# Supplementary material for: Ten quick tips for getting the most scientific value out of numerical data
Source: PLoS Comput Biol. 2018 Oct 11;14(10):e1006141. doi: 10.1371/journal.pcbi.1006141 (PMC6181270; doi:10.1371/journal.pcbi.1006141)
Supplement: S1 Data — The results were obtained using Python 3.5.2, with Numpy 1.11.3 and Pandas 0.19.2. (TGZ) [file pcbi.1006141.s002.tgz]

Archive with 3 entries (3 files):
- nanExample/nanExample.py
- nanExample/nanExampleData.csv
- nanExample/license_CC0.txt
