# Supplementary material for: Ten quick tips for getting the most scientific value out of numerical data
Source: PLoS Comput Biol. 2018 Oct 11;14(10):e1006141. doi: 10.1371/journal.pcbi.1006141 (PMC6181270; doi:10.1371/journal.pcbi.1006141)
Supplement: S1 Data — The results were obtained using Python 3.5.2, with Numpy 1.11.3 and Pandas 0.19.2. (TGZ) [file pcbi.1006141.s002.tgz › nanExample/nanExampleData.csv]

x	y
0.0	1.0
8.0	1.6
0.0	0.0
8.0	2.0
4.0	0.0
1.0
4.0	1.6
0.4	0.4
4.5	1.5
