# Supplementary material for: Ten quick tips for getting the most scientific value out of numerical data
Source: PLoS Comput Biol. 2018 Oct 11;14(10):e1006141. doi: 10.1371/journal.pcbi.1006141 (PMC6181270; doi:10.1371/journal.pcbi.1006141)
Supplement: S2 Data — (TGZ) [file pcbi.1006141.s003.tgz]

Archive with 2 entries (2 files):
- correlationExample/correlationExample.py
- correlationExample/license_CC0.txt
