# Supplementary material for: Ten quick tips for getting the most scientific value out of numerical data
Source: PLoS Comput Biol. 2018 Oct 11;14(10):e1006141. doi: 10.1371/journal.pcbi.1006141 (PMC6181270; doi:10.1371/journal.pcbi.1006141)
Supplement: S3 Data — This archive contains selected tables of the Lahman Baseball Database [41] (in comma-separated values format) by Sean Lahman, licensed under a Creative Commons Attribution-ShareAlike 3.0 Unported License [42], and our Python code implementing the calculations described in Supporting Information S1 Text. (TGZ) [file pcbi.1006141.s004.tgz]

Archive with 8 entries (7 files):
- pValueHackingExample/pValueHacking.py
- pValueHackingExample/license_CC0.txt
- pValueHackingExample/data
- pValueHackingExample/data/Batting.csv
- pValueHackingExample/data/Fielding.csv
- pValueHackingExample/data/People.csv
- pValueHackingExample/data/Pitching.csv
- pValueHackingExample/data/readme2014.txt
