# Supplementary material for: Ten quick tips for getting the most scientific value out of numerical data
Source: PLoS Comput Biol. 2018 Oct 11;14(10):e1006141. doi: 10.1371/journal.pcbi.1006141 (PMC6181270; doi:10.1371/journal.pcbi.1006141)
Supplement: S3 Data — This archive contains selected tables of the Lahman Baseball Database [41] (in comma-separated values format) by Sean Lahman, licensed under a Creative Commons Attribution-ShareAlike 3.0 Unported License [42], and our Python code implementing the calculations described in Supporting Information S1 Text. (TGZ) [file pcbi.1006141.s004.tgz › pValueHackingExample/data/Batting.csv]

playerID	yearID	stint	teamID	lgID	G	AB	R	H	2B	3B	HR	RBI	SB	CS	BB	SO	IBB	HBP	SH	SF	GIDP
abercda01	1871	1	TRO	NA	1	4	0	0	0	0	0	0	0	0	0	0
addybo01	1871	1	RC1	NA	25	118	30	32	6	0	0	13	8	1	4	0
allisar01	1871	1	CL1	NA	29	137	28	40	4	5	0	19	3	1	2	5
allisdo01	1871	1	WS3	NA	27	133	28	44	10	2	2	27	1	1	0	2
ansonca01	1871	1	RC1	NA	25	120	29	39	11	3	0	16	6	2	2	1
armstbo01	1871	1	FW1	NA	12	49	9	11	2	1	0	5	0	1	0	1
barkeal01	1871	1	RC1	NA	1	4	0	1	0	0	0	2	0	0	1	0
barnero01	1871	1	BS1	NA	31	157	66	63	10	9	0	34	11	6	13	1
barrebi01	1871	1	FW1	NA	1	5	1	1	1	0	0	1	0	0	0	0
barrofr01	1871	1	BS1	NA	18	86	13	13	2	1	0	11	1	0	0	0
bassjo01	1871	1	CL1	NA	22	89	18	27	1	10	3	18	0	1	3	4
battijo01	1871	1	CL1	NA	1	3	0	0	0	0	0	0	0	0	1	0
bealsto01	1871	1	WS3	NA	10	36	6	7	0	0	0	1	2	0	2	0
beaveed01	1871	1	TRO	NA	3	15	7	6	0	0	0	5	2	0	0	0
bechtge01	1871	1	PH1	NA	20	94	24	33	9	1	1	21	4	0	2	2
bellast01	1871	1	TRO	NA	29	128	26	32	3	3	0	23	4	4	9	2
berkena01	1871	1	PH1	NA	1	4	0	0	0	0	0	0	0	0	0	3
berryto01	1871	1	PH1	NA	1	4	0	1	0	0	0	0	0	0	0	0
berthha01	1871	1	WS3	NA	17	73	17	17	1	1	0	8	3	1	4	2
biermch01	1871	1	FW1	NA	1	2	0	0	0	0	0	0	0	0	1	0
birdge01	1871	1	RC1	NA	25	106	19	28	2	5	0	13	1	0	3	2
birdsda01	1871	1	BS1	NA	29	152	51	46	3	3	0	24	6	0	4	4
brainas01	1871	1	WS3	NA	30	134	24	30	4	0	0	21	4	0	7	2
brannmi01	1871	1	CH1	NA	3	14	2	1	0	0	0	0	0	0	0	0
burrohe01	1871	1	WS3	NA	12	63	11	15	2	3	1	14	0	0	1	1
careyto01	1871	1	FW1	NA	19	87	16	20	2	0	0	10	5	0	2	1
carleji01	1871	1	CL1	NA	29	127	31	32	8	1	0	18	2	1	8	3
conefr01	1871	1	BS1	NA	19	77	17	20	3	1	0	16	12	1	8	2
connone01	1871	1	TRO	NA	7	33	6	7	0	0	0	2	0	0	0	0
cravebi01	1871	1	TRO	NA	27	118	26	38	8	1	0	26	6	3	3	0
cuthbne01	1871	1	PH1	NA	28	150	47	37	7	5	3	30	16	2	10	2
deaneha01	1871	1	FW1	NA	6	22	3	4	0	1	0	2	0	0	2	0
donnepe01	1871	1	FW1	NA	9	34	7	7	1	1	0	3	0	0	1	2
duffyed01	1871	1	CH1	NA	26	121	30	28	5	0	0	15	11	4	3	2
eggleda01	1871	1	NY2	NA	33	147	37	47	7	3	0	18	14	3	4	3
ewellge01	1871	1	CL1	NA	1	3	0	0	0	0	0	0	0	0	0	0
fergubo01	1871	1	NY2	NA	33	158	30	38	6	1	0	25	4	4	3	2
fishech01	1871	1	RC1	NA	25	123	24	28	3	3	1	22	1	2	3	1
fislewe01	1871	1	PH1	NA	28	147	43	41	8	2	0	16	6	3	3	2
fleetfr01	1871	1	NY2	NA	1	6	1	2	0	0	0	1	0	0	0	0
flowedi01	1871	1	TRO	NA	21	105	39	33	5	4	0	18	8	2	4	0
flynncl01	1871	1	TRO	NA	29	142	43	48	6	1	0	27	3	3	4	2
foleyto01	1871	1	CH1	NA	18	84	18	22	3	1	0	13	1	4	3	2
foranji01	1871	1	FW1	NA	19	89	21	31	1	3	1	18	1	0	2	1
forceda01	1871	1	WS3	NA	32	162	45	45	9	4	0	29	8	0	4	0
fulmech01	1871	1	RC1	NA	16	63	11	17	1	3	0	3	0	0	5	1
glennjo01	1871	1	WS3	NA	26	120	25	37	3	2	0	21	1	1	3	1
goldswa01	1871	1	FW1	NA	19	88	8	18	1	0	0	12	0	0	4	2
gouldch01	1871	1	BS1	NA	31	151	38	43	9	2	2	32	6	2	3	1
hallge01	1871	1	WS3	NA	32	136	31	40	3	3	2	17	2	1	8	0
halliji01	1871	1	FW1	NA	5	25	7	5	0	0	0	2	1	1	2	0
hamra01	1871	1	RC1	NA	25	113	25	28	4	0	0	12	6	2	1	7
hastisc01	1871	1	RC1	NA	25	118	27	30	6	4	0	20	11	2	2	4
hatfijo01	1871	1	NY2	NA	33	168	41	43	3	2	0	22	10	3	4	0
heubege01	1871	1	PH1	NA	17	75	18	23	4	2	0	13	1	0	2	0
highadi01	1871	1	NY2	NA	21	94	21	34	3	1	0	9	3	2	2	0
hodesch01	1871	1	CH1	NA	28	130	32	36	4	1	2	25	3	0	7	0
jackssa01	1871	1	BS1	NA	16	76	17	17	5	3	0	11	0	1	1	4
johnsca01	1871	1	CL1	NA	16	67	10	15	1	0	0	7	1	0	0	1
kellybi01	1871	1	FW1	NA	18	67	16	15	1	1	0	7	0	0	6	1
kimbage01	1871	1	CL1	NA	29	131	18	25	1	0	0	9	5	1	3	2
kingma01	1871	1	CH1	NA	20	101	23	21	1	0	2	16	5	0	8	1
kingst01	1871	1	TRO	NA	29	144	45	57	10	6	0	34	3	3	1	1
kohlehe01	1871	1	FW1	NA	3	12	0	2	1	0	0	1	0	0	0	0
lennobi01	1871	1	FW1	NA	12	48	5	11	3	0	0	5	1	0	1	0
leonaan01	1871	1	WS3	NA	31	148	33	43	8	3	0	30	14	3	3	1
mackde01	1871	1	RC1	NA	25	122	34	30	7	1	0	17	12	0	8	7
malonfe01	1871	1	PH1	NA	27	134	33	46	7	1	1	33	9	3	9	4
mathebo01	1871	1	FW1	NA	19	89	15	24	3	1	0	10	2	1	2	0
mcatebu01	1871	1	CH1	NA	26	135	34	37	8	2	0	10	5	3	5	2
mcbridi01	1871	1	PH1	NA	25	132	36	31	3	0	0	17	4	0	7	1
mcderjo01	1871	1	FW1	NA	2	8	3	2	0	0	0	1	1	0	1	1
mcgeami01	1871	1	TRO	NA	29	148	42	39	4	0	0	12	20	4	6	0
mcmuljo01	1871	1	TRO	NA	29	136	38	38	0	5	0	32	11	1	8	6
mcveyca01	1871	1	BS1	NA	29	153	43	66	9	5	0	43	6	0	1	2
meyerle01	1871	1	PH1	NA	26	130	45	64	9	3	4	40	4	0	2	1
millsch01	1871	1	NY2	NA	32	146	27	36	4	3	0	22	2	0	1	0
millsev01	1871	1	WS3	NA	32	157	38	43	6	4	1	24	2	3	3	1
minched01	1871	1	FW1	NA	9	36	4	8	0	0	0	5	1	0	0	0
nortofr01	1871	1	WS3	NA	1	1	0	0	0	0	0	0	0	0	0	1
paborch01	1871	1	CL1	NA	29	142	24	42	2	4	0	18	1	0	1	3
patteda01	1871	1	NY2	NA	32	151	31	31	2	0	0	13	2	1	1	0
pearcdi01	1871	1	NY2	NA	33	163	31	44	5	0	0	20	0	0	4	1
phelpne01	1871	1	FW1	NA	1	3	0	0	0	0	0	0	0	0	1	0
pikeli01	1871	1	TRO	NA	28	130	43	49	10	7	4	39	3	2	5	7
pinkhed01	1871	1	CH1	NA	24	95	27	25	5	5	1	17	5	2	18	3
prattal01	1871	1	CL1	NA	29	130	31	34	6	8	0	20	1	0	1	0
prattto01	1871	1	PH1	NA	1	6	2	2	0	0	0	1	0	0	0	0
questjo01	1871	1	CL1	NA	3	13	1	3	1	0	0	2	0	0	1	0
quinnpa02	1871	1	FW1	NA	5	17	8	4	0	0	0	2	3	1	4	0
radcljo01	1871	1	PH1	NA	28	145	47	44	7	5	0	22	5	1	6	1
reachal01	1871	1	PH1	NA	26	133	43	47	7	6	0	34	2	0	5	6
sagerpo01	1871	1	RC1	NA	8	39	9	11	0	0	0	5	5	1	2	2
schafha01	1871	1	BS1	NA	31	149	38	42	7	5	0	28	13	4	3	1
selmafr01	1871	1	FW1	NA	14	65	14	15	3	0	1	10	1	0	4	0
senseco01	1871	1	PH1	NA	25	127	38	41	5	2	0	23	5	3	0	1
simmojo01	1871	1	CH1	NA	27	129	29	28	6	1	0	17	4	1	1	0
smithch01	1871	1	NY2	NA	14	72	15	19	2	1	0	5	6	0	1	1
spaldal01	1871	1	BS1	NA	31	144	43	39	10	1	1	31	2	0	8	1
startjo01	1871	1	NY2	NA	33	161	35	58	5	1	1	34	4	2	3	0
stearbi01	1871	1	WS3	NA	2	9	1	0	0	0	0	1	0	0	2	2
stirega01	1871	1	RC1	NA	25	110	23	30	4	6	2	24	3	0	7	5
suttoez01	1871	1	CL1	NA	29	128	35	45	3	7	3	23	3	1	1	0
sweasch01	1871	1	WS3	NA	5	19	5	4	1	0	0	4	0	0	1	0
treacfr01	1871	1	CH1	NA	25	124	39	42	7	5	4	33	13	5	2	5
waterfr01	1871	1	WS3	NA	32	158	46	50	7	4	0	17	11	3	10	0
whitede01	1871	1	CL1	NA	29	146	40	47	6	5	1	21	2	2	4	1
whiteel01	1871	1	CL1	NA	15	70	13	18	2	0	0	9	0	1	1	6
whitewa01	1871	1	WS3	NA	1	4	0	0	0	0	0	0	0	0	0	0
woltery01	1871	1	NY2	NA	32	138	33	51	6	9	0	44	1	0	10	8
woodji01	1871	1	CH1	NA	28	135	45	51	10	6	1	29	18	2	11	3
wrighge01	1871	1	BS1	NA	16	80	33	33	7	5	0	11	9	1	6	1
wrighha01	1871	1	BS1	NA	31	147	42	44	5	2	0	26	7	1	13	2
yorkto01	1871	1	TRO	NA	29	145	36	37	5	7	2	23	2	2	9	1
zettlge01	1871	1	CH1	NA	28	128	23	32	3	0	0	18	4	0	2	4
allenha01	1872	1	MID	NA	16	66	8	18	1	0	0	7	0	0	0	1
allisan01	1872	1	BR1	NA	24	93	11	15	3	0	0	9	0	0	0	3
allisar01	1872	1	CL1	NA	19	87	13	23	4	0	0	8	0	0	0	2
allisbi01	1872	1	BR1	NA	5	19	5	3	0	0	0	1	0	0	0	1
allisdo01	1872	1	TRO	NA	23	115	23	35	4	2	0	20	1	1	1	3
allisdo01	1872	2	BR1	NA	18	79	18	27	2	1	0	5	0	0	1	2
ansonca01	1872	1	PH1	NA	46	217	60	90	10	7	0	50	6	6	16	3
arnolbi01	1872	1	MID	NA	2	7	2	1	0	0	0	0	0	0	0	0
barloto01	1872	1	BR2	NA	37	171	34	53	1	0	0	10	7	5	3	2
barnero01	1872	1	BS1	NA	45	229	81	99	28	2	1	44	12	2	9	4
barre01	1872	1	BR2	NA	8	34	7	7	1	0	0	2	1	0	0	1
barrebi01	1872	1	WS3	NA	1	4	0	0	0	0	0	0	0	0	0	0
bassjo01	1872	1	BR2	NA	2	7	0	1	1	0	0	1	0	0	0	0
bealsto01	1872	1	WS3	NA	9	36	6	11	1	1	0	5	0	0	1	1
beaveed01	1872	1	BR2	NA	10	43	6	9	2	0	0	2	0	0	1	0
bechtge01	1872	1	NY2	NA	51	248	60	74	11	2	0	41	9	1	6	3
bellast01	1872	1	TRO	NA	23	114	22	30	4	0	0	16	1	0	0	0
bentlcy01	1872	1	MID	NA	23	115	25	27	1	2	0	10	1	2	0	2
besti01	1872	1	BR1	NA	4	14	0	4	0	0	0	1	0	0	0	0
bielaos01	1872	1	WS4	NA	10	46	13	9	0	0	0	3	0	0	0	0
birdsda01	1872	1	BS1	NA	16	76	11	16	3	0	0	15	0	2	1	0
boothed01	1872	1	MID	NA	24	117	25	38	4	2	0	12	0	0	0	1
boothed01	1872	2	BR2	NA	15	62	11	19	4	0	0	8	0	2	0	0
boydbi01	1872	1	NY2	NA	35	165	26	44	6	1	1	32	4	2	6	7
brainas01	1872	1	WS3	NA	9	43	8	16	3	0	0	6	0	0	0	0
brainas01	1872	2	MID	NA	6	25	2	5	0	0	0	0	0	0	1	0
brittji01	1872	1	BR2	NA	37	156	26	40	7	0	0	10	0	0	5	5
brownol01	1872	1	BR2	NA	4	15	0	2	0	0	0	0	0	0	0	1
burdoja01	1872	1	BR2	NA	37	174	26	46	3	0	0	15	0	1	1	1
burrohe01	1872	1	WS3	NA	2	7	1	1	0	0	0	0	0	0	1	0
buttefr01	1872	1	MID	NA	18	93	19	24	0	0	0	8	0	0	0	2
careyto01	1872	1	BL1	NA	42	198	42	57	7	0	2	27	4	1	0	2
carleji01	1872	1	CL1	NA	7	38	8	12	1	0	0	4	1	0	1	0
clappjo01	1872	1	MID	NA	19	97	28	28	6	1	1	10	2	1	1	0
clarede01	1872	1	BR2	NA	2	7	1	1	0	0	0	0	0	0	0	0
clintji01	1872	1	BR1	NA	25	97	12	25	3	1	0	6	0	1	0	2
coughde01	1872	1	WS4	NA	8	37	5	12	1	0	0	7	0	0	0	0
cravebi01	1872	1	BL1	NA	35	179	55	50	3	2	0	23	7	1	5	2
cummica01	1872	1	NY2	NA	55	250	36	52	9	3	0	27	0	1	4	14
cuthbne01	1872	1	PH1	NA	47	260	83	88	10	0	1	47	14	4	6	10
dehlmhe01	1872	1	BR2	NA	37	165	30	36	3	1	0	14	4	2	3	1
doschhe01	1872	1	BR2	NA	6	25	4	9	0	0	0	5	0	0	0	1
doylejo01	1872	1	WS4	NA	9	41	6	12	1	0	0	9	0	0	0	0
eggleda01	1872	1	NY2	NA	56	290	94	98	20	0	0	20	18	5	8	9
fergubo01	1872	1	BR2	NA	37	165	33	46	5	0	0	19	4	2	3	0
fieldge01	1872	1	MID	NA	18	87	16	21	3	1	0	9	0	0	0	2
fishech01	1872	1	BL1	NA	46	225	39	52	10	3	1	36	0	1	2	5
fislewe01	1872	1	PH1	NA	47	243	49	85	13	3	0	48	3	0	4	4
fleetfr01	1872	1	BR1	NA	13	53	10	13	1	0	0	5	1	0	0	1
fletcge01	1872	1	BR1	NA	2	8	1	3	0	0	0	0	0	0	0	0
flowedi01	1872	1	PH1	NA	3	15	1	4	0	0	0	4	0	0	2	2
flynncl01	1872	1	WS3	NA	9	40	4	9	1	0	0	2	0	0	0	0
forceda01	1872	1	TRO	NA	25	130	40	53	11	0	0	16	2	2	1	0
forceda01	1872	2	BL1	NA	19	95	29	41	2	2	0	13	3	0	1	0
fulmech01	1872	1	NY2	NA	36	166	28	51	1	1	1	14	1	1	2	3
galvijo01	1872	1	BR2	NA	1	4	0	0	0	0	0	0	0	0	0	0
gedneco01	1872	1	TRO	NA	9	47	14	20	3	0	3	18	1	0	0	0
gedneco01	1872	2	BR1	NA	18	71	4	13	1	0	0	7	2	1	0	1
glennjo01	1872	1	WS3	NA	9	39	6	6	0	0	0	3	0	1	1	0
glennjo01	1872	2	WS4	NA	1	4	0	2	0	0	0	0	0	0	0	0
goldswa01	1872	1	WS3	NA	9	41	4	10	2	0	0	5	0	0	0	0
gouldch01	1872	1	BS1	NA	45	211	40	54	9	8	0	33	0	0	2	3
hallge01	1872	1	BL1	NA	53	250	69	84	17	6	1	37	6	1	3	1
hallji01	1872	1	BR2	NA	13	57	9	18	0	1	0	6	0	0	1	0
hastisc01	1872	1	CL1	NA	22	115	34	45	4	0	0	16	5	1	3	2
hastisc01	1872	2	BL1	NA	13	62	16	19	3	1	0	4	0	1	1	2
hatfijo01	1872	1	NY2	NA	56	288	76	92	15	1	1	45	12	5	9	6
heubege01	1872	1	WS3	NA	5	23	2	3	0	0	0	1	0	0	0	0
hicksna01	1872	1	NY2	NA	56	268	55	82	12	2	0	33	3	0	5	3
higby01	1872	1	BR2	NA	1	4	0	0	0	0	0	0	0	0	0	0
highadi01	1872	1	BL1	NA	50	245	72	84	10	1	2	38	3	5	2	3
hinespa01	1872	1	WS4	NA	11	49	9	12	1	0	0	5	0	0	0	0
hodesch01	1872	1	TRO	NA	13	61	17	15	3	0	0	12	0	0	1	0
holdsji01	1872	1	CL1	NA	22	110	19	33	5	0	0	11	3	2	1	2
holdsji01	1872	2	BR1	NA	2	7	1	2	0	0	0	0	0	0	0	0
holliho01	1872	1	WS4	NA	9	44	12	15	1	1	0	6	0	0	1	0
huntdi01	1872	1	BR1	NA	11	48	11	15	1	1	0	5	0	1	1	0
hurledi01	1872	1	WS3	NA	2	7	0	0	0	0	0	0	0	0	0	1
jackssa01	1872	1	BR2	NA	4	12	0	2	0	0	0	0	0	0	0	0
jewetna01	1872	1	BR1	NA	2	8	1	1	0	0	0	0	0	0	0	0
kavan01	1872	1	BR1	NA	5	23	3	6	1	0	0	2	0	0	0	1
kennejo01	1872	1	BR2	NA	5	19	0	0	0	0	0	1	0	0	0	1
kingma01	1872	1	TRO	NA	3	11	0	0	0	0	0	1	0	0	0	1
kingst01	1872	1	TRO	NA	25	128	33	39	8	0	0	21	1	1	1	2
lennobi01	1872	1	WS4	NA	11	54	11	12	1	0	0	6	0	0	0	0
leonaan01	1872	1	BS1	NA	46	240	57	84	7	1	2	43	8	5	0	2
leutz01	1872	1	BR1	NA	4	12	2	1	0	0	0	0	0	0	0	0
lowech01	1872	1	BR2	NA	7	31	1	5	0	0	0	3	0	0	0	2
mackde01	1872	1	PH1	NA	47	205	68	59	9	1	0	34	9	5	23	9
malonfe01	1872	1	PH1	NA	41	213	46	60	5	3	0	39	3	0	4	5
malonma01	1872	1	BR1	NA	5	16	2	5	0	0	0	1	0	0	1	4
martial01	1872	1	BR1	NA	4	18	2	5	0	0	0	2	0	0	0	0
martiph01	1872	1	TRO	NA	25	117	27	36	2	1	0	14	0	0	0	1
martiph01	1872	2	BR1	NA	18	78	13	12	0	0	0	9	3	1	1	2
mathebo01	1872	1	BL1	NA	50	223	36	50	1	0	0	21	1	1	3	2
mcatebu01	1872	1	TRO	NA	25	129	30	28	3	1	0	15	0	2	1	2
mcbridi01	1872	1	PH1	NA	47	258	57	74	6	1	0	37	2	1	3	2
mccarfr01	1872	1	MID	NA	19	85	17	28	4	1	0	10	0	0	1	3
mcderjo01	1872	1	BR1	NA	7	32	3	9	3	0	0	3	0	0	1	2
mcdonja01	1872	1	BR2	NA	15	62	9	16	3	1	0	4	0	0	0	1
mcdonja01	1872	2	BR1	NA	1	4	0	0	0	0	0	0	0	0	0	0
mcgeami01	1872	1	PH1	NA	47	225	68	81	9	2	0	35	13	8	2	1
mcmuljo01	1872	1	NY2	NA	54	237	48	61	6	1	0	25	8	2	11	6
mcveyca01	1872	1	BS1	NA	46	237	56	76	10	2	0	41	6	1	1	1
meyerle01	1872	1	PH1	NA	27	146	31	48	10	5	1	31	0	0	0	1
millejo01	1872	1	WS4	NA	1	4	0	1	0	0	0	0	0	0	0	0
millsch01	1872	1	NY2	NA	6	31	6	4	0	0	0	2	0	0	0	0
millsev01	1872	1	BL1	NA	55	266	55	79	14	2	0	34	0	2	3	2
minched01	1872	1	WS4	NA	11	53	5	6	0	0	0	4	0	0	0	1
mulle01	1872	1	CL1	NA	1	4	1	0	0	0	0	0	0	0	0	0
murnati01	1872	1	MID	NA	24	117	30	42	1	0	0	13	1	0	0	1
nelsoca01	1872	1	TRO	NA	4	20	2	7	0	0	0	4	0	0	0	2
nelsoca01	1872	2	BR1	NA	18	76	12	19	2	0	0	8	1	0	2	2
orour01	1872	1	BR1	NA	1	4	0	0	0	0	0	0	0	0	0	0
orourji01	1872	1	MID	NA	23	101	25	31	4	1	0	12	1	0	2	0
paborch01	1872	1	CL1	NA	21	92	12	19	0	0	0	7	0	0	0	0
patteda01	1872	1	BR1	NA	12	47	5	9	2	0	0	4	0	0	0	1
pearcdi01	1872	1	NY2	NA	44	206	32	40	1	1	1	23	1	1	4	1
pikeli01	1872	1	BL1	NA	56	288	67	84	15	5	6	60	8	1	3	6
prattal01	1872	1	CL1	NA	16	65	10	18	0	1	0	12	0	0	0	1
radcljo01	1872	1	BL1	NA	56	297	71	86	13	4	1	44	3	3	0	2
reachal01	1872	1	PH1	NA	24	118	21	23	0	0	0	11	1	1	4	0
reachbo01	1872	1	WS3	NA	2	8	1	2	0	0	0	0	0	0	0	0
remseja01	1872	1	BR2	NA	37	164	25	40	4	5	0	13	1	2	2	6
robinva01	1872	1	WS3	NA	7	30	6	6	0	0	0	4	0	0	1	1
rogerfr01	1872	1	BS1	NA	45	204	39	56	7	1	1	28	2	0	1	4
schafha01	1872	1	BS1	NA	48	225	51	65	10	4	1	37	2	0	0	8
selmafr01	1872	1	WS3	NA	9	42	3	10	2	0	0	1	0	2	0	1
senseco01	1872	1	PH1	NA	1	5	2	2	0	0	0	1	0	1	0	0
simmojo01	1872	1	CL1	NA	18	90	11	23	5	1	0	9	1	0	1	2
snydeji01	1872	1	BR1	NA	26	107	16	28	2	2	0	11	0	0	0	1
snydejo01	1872	1	BR1	NA	9	37	2	6	2	0	0	1	0	0	1	1
spaldal01	1872	1	BS1	NA	48	237	60	84	11	5	0	47	3	0	3	1
spenc01	1872	1	WS4	NA	1	4	1	0	0	0	0	0	0	0	0	0
startjo01	1872	1	NY2	NA	55	282	62	76	4	0	0	50	3	3	0	0
stearbi01	1872	1	WS4	NA	11	45	8	12	1	0	0	4	0	0	0	0
studlse01	1872	1	WS4	NA	5	21	3	2	0	0	0	2	0	0	0	1
suttoez01	1872	1	CL1	NA	22	107	30	30	6	1	0	10	1	0	1	1
swandma01	1872	1	BR1	NA	14	55	7	11	0	0	0	4	0	0	2	1
sweasch01	1872	1	CL1	NA	12	57	8	16	0	0	0	6	1	0	2	1
thakeal01	1872	1	BR2	NA	18	78	14	23	2	2	0	15	2	0	0	2
tippeji01	1872	1	MID	NA	24	112	23	31	5	1	0	15	0	0	0	0
treacfr01	1872	1	PH1	NA	47	236	53	65	7	3	2	29	7	5	5	10
waterfr01	1872	1	WS3	NA	9	45	13	17	1	2	0	6	0	0	0	0
whitede01	1872	1	CL1	NA	22	109	21	37	2	2	0	22	0	0	4	1
whitewa01	1872	1	WS4	NA	10	45	7	13	0	0	0	4	0	0	0	0
woltery01	1872	1	CL1	NA	16	69	7	16	1	0	0	11	0	0	4	1
woodji01	1872	1	TRO	NA	25	113	40	38	11	4	2	27	3	0	2	1
woodji01	1872	2	BR1	NA	7	30	10	6	1	1	0	0	1	0	4	1
worthhe01	1872	1	BR2	NA	1	5	1	1	1	0	0	1	0	0	0	0
wrighge01	1872	1	BS1	NA	48	255	87	86	16	6	2	32	14	4	3	1
wrighha01	1872	1	BS1	NA	48	208	39	52	5	1	0	23	0	0	9	2
yeatmbi01	1872	1	WS4	NA	1	4	0	0	0	0	0	0	0	0	0	1
yorkto01	1872	1	BL1	NA	51	248	66	66	10	4	1	41	2	1	4	1
zettlge01	1872	1	TRO	NA	25	113	25	29	9	0	0	21	0	1	0	2
zettlge01	1872	2	BR1	NA	9	34	1	3	0	0	0	1	0	0	0	3
addybo01	1873	1	PH2	NA	10	51	12	16	1	0	0	10	0	1	2	0
addybo01	1873	2	BS1	NA	31	152	37	54	5	2	1	36	2	3	1	0
allisar01	1873	1	ELI	NA	23	99	12	32	2	0	0	11	0	0	0	0
allisdo01	1873	1	ELI	NA	19	83	11	24	5	0	0	8	0	0	0	0
allisdo01	1873	2	NY2	NA	11	48	6	10	0	0	0	3	0	0	1	0
ansonca01	1873	1	PH1	NA	52	254	53	101	9	2	0	36	0	2	5	1
atkined01	1873	1	WS5	NA	2	8	2	0	0	0	0	0	0	0	0	0
austihe01	1873	1	ELI	NA	23	101	10	25	3	3	0	11	0	0	0	4
barloto01	1873	1	BR2	NA	55	271	48	74	0	2	1	14	3	3	4	0
barnero01	1873	1	BS1	NA	60	322	125	137	29	8	2	62	13	4	18	2
barrebi01	1873	1	BL1	NA	1	4	0	1	0	0	0	0	0	1	0	0
battijo01	1873	1	PH1	NA	1	5	4	3	0	0	0	2	0	0	1	0
bealsto01	1873	1	WS5	NA	37	169	35	46	9	5	0	24	1	0	1	1
bechtge01	1873	1	PH2	NA	53	258	53	63	12	1	1	40	2	1	9	1
bellast01	1873	1	NY2	NA	8	32	4	7	2	0	0	3	0	0	2	0
bielaos01	1873	1	WS5	NA	38	173	35	49	3	2	0	23	0	1	4	5
birdsda01	1873	1	BS1	NA	3	12	4	1	0	0	0	1	0	0	0	0
boothed01	1873	1	ELI	NA	18	72	11	21	3	2	0	4	0	0	0	2
boothed01	1873	2	BR2	NA	16	69	8	14	3	1	0	8	0	1	3	0
boydbi01	1873	1	BR2	NA	50	228	31	63	5	4	1	31	1	1	2	2
brainas01	1873	1	BL1	NA	16	69	18	18	1	0	0	8	0	0	0	2
brittji01	1873	1	BR2	NA	54	240	29	47	3	0	0	14	1	1	8	14
burdoja01	1873	1	BR2	NA	55	245	56	62	7	1	2	36	3	1	7	4
campbhu01	1873	1	ELI	NA	20	87	9	13	0	1	0	6	1	0	2	1
campbmi02	1873	1	ELI	NA	21	83	9	12	0	0	0	3	1	0	3	6
careyto01	1873	1	BL1	NA	56	290	76	97	19	3	1	55	1	3	1	2
clappjo01	1873	1	PH1	NA	45	204	36	62	10	2	1	28	4	5	2	2
clintji01	1873	1	ELI	NA	9	38	5	9	1	0	0	4	0	0	0	0
cranefr01	1873	1	ELI	NA	1	4	0	1	0	0	0	1	0	0	0	0
cravebi01	1873	1	BL1	NA	41	196	45	57	9	2	0	28	2	3	2	3
cummica01	1873	1	BL1	NA	42	192	30	48	5	0	0	35	1	0	5	5
cuthbne01	1873	1	PH2	NA	51	278	78	77	5	3	2	33	13	2	2	4
dehlmhe01	1873	1	BR2	NA	54	221	50	52	4	1	0	17	5	0	9	7
devliji01	1873	1	PH2	NA	23	99	18	24	4	4	0	10	0	0	2	4
donnejo01	1873	1	WS5	NA	30	137	15	35	1	0	0	20	0	0	1	0
doschhe01	1873	1	BR2	NA	1	6	1	1	0	0	0	1	0	0	0	0
eggleda01	1873	1	NY2	NA	53	268	82	90	13	4	0	34	4	1	5	2
eland01	1873	1	BL4	NA	1	3	0	0	0	0	0	0	0	0	0	0
farrojo01	1873	1	ELI	NA	12	48	2	8	1	0	0	3	0	0	0	3
fergubo01	1873	1	BR2	NA	51	228	36	59	3	5	0	25	1	2	4	9
fishech01	1873	1	PH1	NA	51	253	50	66	4	3	1	35	1	2	4	5
fislewe01	1873	1	PH1	NA	44	218	44	75	11	4	1	42	2	1	2	2
fleetfr01	1873	1	ELI	NA	22	90	11	23	2	0	0	10	0	1	1	2
forceda01	1873	1	BL1	NA	49	234	77	86	8	1	0	31	1	0	9	0
frencbi01	1873	1	BL4	NA	5	18	3	4	0	0	0	1	0	0	0	0
fulmech01	1873	1	PH2	NA	49	236	42	66	11	3	1	38	3	1	2	3
gedneco01	1873	1	NY2	NA	53	224	41	60	5	5	1	25	1	0	7	5
gerhajo01	1873	1	WS5	NA	13	56	6	12	3	0	0	7	0	0	0	5
glennjo01	1873	1	WS5	NA	39	185	39	49	8	2	1	21	2	1	3	0
goldswa01	1873	1	BL4	NA	1	4	0	0	0	0	0	0	0	0	0	0
greasjo01	1873	1	WS5	NA	7	28	4	4	0	0	0	1	1	0	1	1
hallge01	1873	1	BL1	NA	35	168	44	58	6	3	0	30	0	0	2	0
hastisc01	1873	1	BL1	NA	30	146	41	41	4	0	0	15	4	2	4	1
hatfijo01	1873	1	NY2	NA	52	255	54	78	5	6	2	45	2	0	3	2
hicksna01	1873	1	NY2	NA	28	121	12	29	1	2	1	14	2	0	7	0
highadi01	1873	1	NY2	NA	49	245	57	77	5	4	0	34	1	3	2	1
hinespa01	1873	1	WS5	NA	39	181	33	60	6	3	1	29	0	1	1	1
holdsji01	1873	1	NY2	NA	53	233	46	75	4	8	0	28	1	0	0	3
holliho01	1873	1	WS5	NA	30	136	25	35	2	2	0	22	0	0	0	6
hoopemi01	1873	1	BL4	NA	3	14	3	3	1	0	0	2	0	0	0	0
johnsto01	1873	1	BL4	NA	1	4	0	0	0	0	0	0	0	0	0	0
jones01	1873	1	BL4	NA	1	4	0	3	0	0	0	1	0	0	0	0
kernajo01	1873	1	BL4	NA	2	8	1	3	0	0	0	1	0	0	0	0
kesslhe01	1873	1	BR2	NA	1	5	0	1	0	0	0	1	0	0	0	0
kohlehe01	1873	1	BL4	NA	6	25	2	3	0	0	0	1	0	0	0	1
laughbe01	1873	1	ELI	NA	12	50	3	12	0	0	0	6	0	0	0	0
lennobi01	1873	1	BL4	NA	5	19	2	4	0	0	0	2	0	0	0	0
leonaan01	1873	1	BS1	NA	58	302	81	95	12	7	0	61	5	6	4	0
lovetle01	1873	1	ELI	NA	1	5	1	2	0	0	0	1	0	0	0	0
mackde01	1873	1	PH2	NA	48	205	55	60	5	0	0	20	6	2	15	9
malonfe01	1873	1	PH2	NA	53	259	59	75	11	2	0	43	2	1	14	7
mannija01	1873	1	BS1	NA	32	159	29	43	6	1	0	22	1	0	1	11
martiph01	1873	1	NY2	NA	31	140	12	31	1	0	0	14	0	1	0	4
mathebo01	1873	1	NY2	NA	52	223	40	43	3	3	0	13	1	1	10	3
mcbridi01	1873	1	PH1	NA	49	253	41	71	6	0	0	41	0	0	2	0
mcdoo01	1873	1	BL4	NA	1	4	1	0	0	0	0	0	0	0	0	0
mcgeami01	1873	1	PH1	NA	52	275	63	83	8	1	0	31	3	6	1	1
mcmuljo01	1873	1	PH1	NA	52	227	54	62	7	1	0	29	9	1	8	4
mcveyca01	1873	1	BL1	NA	38	192	49	73	4	5	2	34	1	0	3	2
meyerle01	1873	1	PH2	NA	48	238	53	83	14	4	3	58	5	0	2	0
millsev01	1873	1	BL1	NA	54	263	64	87	19	9	0	57	1	0	2	1
murnati01	1873	1	PH1	NA	41	176	53	39	3	0	1	10	7	2	8	13
nelsoca01	1873	1	NY2	NA	36	168	28	55	4	1	0	22	2	0	1	2
nevinal01	1873	1	ELI	NA	13	53	7	11	1	2	0	2	0	0	0	3
orourji01	1873	1	BS1	NA	57	280	79	98	19	3	1	48	4	2	14	1
paborch01	1873	1	BR2	NA	55	228	36	82	8	3	0	42	2	0	6	3
pearcdi01	1873	1	BR2	NA	55	262	42	72	5	0	1	26	2	0	8	2
phelpne01	1873	1	NY2	NA	1	6	0	0	0	0	0	0	0	0	0	0
pikeli01	1873	1	BL1	NA	56	286	71	90	14	8	4	50	8	1	7	4
popplge01	1873	1	BL4	NA	1	4	0	0	0	0	0	0	0	0	0	0
radcljo01	1873	1	BL1	NA	45	245	59	70	7	0	0	33	0	0	3	2
reachal01	1873	1	PH1	NA	13	73	13	16	5	1	0	9	2	0	0	0
reachbo01	1873	1	WS5	NA	1	5	1	1	0	0	0	0	0	0	0	0
remseja01	1873	1	BR2	NA	50	207	29	61	4	6	1	29	1	2	2	2
rogerfr01	1873	1	BS1	NA	1	6	1	2	1	0	0	2	0	0	0	1
ryanjo01	1873	1	PH2	NA	2	8	1	2	0	0	0	1	0	0	0	0
saylo01	1873	1	BL4	NA	3	12	1	2	0	0	0	2	0	0	0	0
schafha01	1873	1	BS1	NA	60	295	65	79	12	3	2	46	3	4	3	1
selmafr01	1873	1	BL4	NA	1	3	1	1	0	0	0	0	0	0	0	0
senseco01	1873	1	PH1	NA	20	86	12	24	1	0	0	8	0	2	0	2
sheppjo01	1873	1	BL4	NA	3	11	1	0	0	0	0	0	0	0	0	1
simpsma01	1873	1	BL4	NA	4	15	4	2	0	0	0	2	0	0	0	0
smithbi01	1873	1	BL4	NA	6	23	2	4	0	0	0	1	0	0	0	0
smithjo01	1873	1	BL4	NA	5	19	2	2	0	0	0	1	0	0	0	1
snydepo01	1873	1	WS5	NA	28	108	16	21	2	0	0	4	0	1	3	3
spaldal01	1873	1	BS1	NA	60	322	83	106	18	2	1	60	1	0	3	1
startjo01	1873	1	NY2	NA	53	251	42	67	8	3	1	28	1	0	4	0
stearbi01	1873	1	WS5	NA	32	133	22	24	0	0	0	8	0	0	4	9
strated01	1873	1	BL4	NA	4	16	2	2	0	0	0	0	0	0	0	0
suttoez01	1873	1	PH1	NA	51	242	51	81	7	6	0	33	1	3	2	2
swandma01	1873	1	ELI	NA	2	9	1	1	0	0	0	1	0	0	0	0
sweasch01	1873	1	BS1	NA	1	4	0	1	0	0	0	0	0	0	0	0
treacfr01	1873	1	PH2	NA	51	243	49	62	7	2	1	32	2	3	5	6
wallho01	1873	1	WS5	NA	1	4	1	1	0	0	0	0	0	0	0	0
waterfr01	1873	1	WS5	NA	15	80	20	28	1	1	0	12	0	0	1	1
whitede01	1873	1	BS1	NA	60	310	79	121	15	6	0	66	6	2	0	2
whitewa01	1873	1	WS5	NA	39	160	29	43	3	4	0	21	1	1	0	1
woltery01	1873	1	ELI	NA	1	4	1	0	0	0	0	0	0	0	0	0
woodhre01	1873	1	BL4	NA	1	5	1	0	0	0	0	0	0	0	0	0
woodji01	1873	1	PH2	NA	42	209	67	67	11	1	0	27	8	3	8	1
wordsfa01	1873	1	ELI	NA	12	42	5	10	0	0	0	3	0	0	2	1
wrighge01	1873	1	BS1	NA	59	325	99	126	19	8	3	50	3	5	8	2
wrighha01	1873	1	BS1	NA	58	266	57	67	10	4	2	35	1	1	10	3
yorkto01	1873	1	BL1	NA	57	277	70	84	10	7	2	49	3	1	3	3
zettlge01	1873	1	PH2	NA	51	241	39	50	2	0	0	22	3	0	1	4
addybo01	1874	1	HR1	NA	50	213	25	51	9	2	0	23	4	2	1	0
allisdo01	1874	1	NY2	NA	65	318	68	90	7	5	0	28	1	0	6	5
ansonca01	1874	1	PH1	NA	55	259	51	87	8	3	0	37	6	0	4	1
barloto01	1874	1	HR1	NA	32	156	37	46	4	1	0	10	9	2	0	2
barnero01	1874	1	BS1	NA	51	259	72	88	12	4	0	41	8	7	8	2
barnibi01	1874	1	HR1	NA	45	190	21	35	4	2	0	19	2	2	1	13
battijo01	1874	1	PH1	NA	51	226	40	52	11	1	0	27	3	2	1	7
bealsto01	1874	1	BS1	NA	19	97	20	19	3	4	0	17	0	1	0	2
bechtge01	1874	1	PH2	NA	32	151	29	42	4	5	1	34	0	0	2	1
bielaos01	1874	1	BL1	NA	43	187	24	45	0	0	0	8	3	1	2	4
boardfr01	1874	1	BL1	NA	1	4	0	1	0	0	0	0	0	0	0	0
bondto01	1874	1	BR2	NA	55	245	25	54	10	1	0	20	0	0	1	5
boothed01	1874	1	BR2	NA	44	185	24	47	4	3	1	16	0	0	3	3
boydbi01	1874	1	HR1	NA	26	117	22	41	8	4	0	20	1	0	1	2
bradyst01	1874	1	HR1	NA	27	118	19	37	5	1	0	14	1	2	2	10
brainas01	1874	1	BL1	NA	47	196	19	47	3	0	0	8	0	3	2	3
brown01	1874	1	BL1	NA	2	9	0	0	0	0	0	0	0	0	0	0
burdoja01	1874	1	NY2	NA	61	273	45	75	11	4	1	27	4	0	1	5
careyto01	1874	1	NY2	NA	64	286	56	82	10	3	1	39	3	0	2	4
carlle01	1874	1	BL1	NA	1	3	0	0	0	0	0	0	0	0	0	0
chapmja01	1874	1	BR2	NA	53	242	32	64	10	2	0	25	2	1	4	11
clackbo01	1874	1	BR2	NA	33	135	22	23	1	0	0	13	0	0	4	2
clappjo01	1874	1	PH1	NA	39	165	46	48	7	4	3	20	2	0	1	1
clintji01	1874	1	BR2	NA	2	11	3	2	1	0	0	2	0	0	0	2
collida01	1874	1	CH2	NA	3	12	1	1	1	0	0	0	1	0	0	2
connete01	1874	1	CH2	NA	1	4	0	0	0	0	0	0	0	0	0	0
cravebi01	1874	1	PH2	NA	55	265	68	91	19	11	0	56	11	3	4	2
cummica01	1874	1	PH2	NA	54	231	32	52	4	2	0	19	1	1	0	12
cuthbne01	1874	1	CH2	NA	58	295	65	79	6	1	2	22	8	0	5	5
deaneha01	1874	1	BL1	NA	47	203	29	50	8	1	0	13	2	1	5	3
dehlmhe01	1874	1	BR2	NA	53	218	40	49	3	1	0	18	2	0	7	5
devliji01	1874	1	CH2	NA	45	203	26	58	5	0	0	27	2	1	2	9
donnejo01	1874	1	PH2	NA	6	22	2	5	0	0	0	2	0	0	0	0
eggleda01	1874	1	PH2	NA	58	299	70	95	13	8	0	31	5	6	5	1
farreja01	1874	1	HR1	NA	3	13	3	5	0	0	0	0	0	0	1	0
farrojo01	1874	1	BR2	NA	27	122	16	26	3	0	0	10	0	0	1	1
fergubo01	1874	1	BR2	NA	56	245	34	64	4	0	0	18	4	3	2	7
fishech01	1874	1	HR1	NA	52	241	28	54	7	0	0	28	0	2	2	6
fislewe01	1874	1	PH1	NA	37	180	26	59	12	1	0	22	2	0	0	1
fleetfr01	1874	1	BR2	NA	22	97	18	22	0	0	0	10	1	0	1	1
forceda01	1874	1	CH2	NA	59	294	61	92	9	0	0	26	4	0	3	1
fulmech01	1874	1	PH2	NA	57	258	49	72	3	2	0	37	0	2	2	5
gaver01	1874	1	BR2	NA	1	4	1	0	0	0	0	0	0	0	0	0
gedneco01	1874	1	PH1	NA	54	222	49	61	4	1	1	34	2	2	7	11
geerbi01	1874	1	NY2	NA	2	8	0	2	0	0	0	1	0	0	0	0
gerhajo01	1874	1	BL1	NA	14	61	10	19	0	1	0	6	0	0	0	0
gilro01	1874	1	CH2	NA	8	38	4	8	1	0	0	7	0	0	1	3
glennjo01	1874	1	CH2	NA	55	237	33	67	9	0	0	33	2	2	5	4
gouldch01	1874	1	BL1	NA	33	143	20	32	6	0	0	14	1	0	2	1
hallge01	1874	1	BS1	NA	47	222	58	64	10	8	1	32	2	0	1	0
hallji01	1874	1	BR2	NA	2	9	0	1	0	0	0	0	0	0	0	0
hastisc01	1874	1	HR1	NA	52	246	60	80	11	2	0	29	7	4	5	3
hatfijo01	1874	1	NY2	NA	63	292	47	66	12	1	0	30	4	0	7	12
hicksna01	1874	1	PH2	NA	58	266	51	73	8	1	0	30	3	2	5	4
highadi01	1874	1	NY2	NA	65	333	58	87	14	3	1	37	5	3	4	0
hinespa01	1874	1	CH2	NA	59	271	47	80	10	2	0	34	4	1	4	4
hodesch01	1874	1	BR2	NA	21	81	8	12	3	0	0	7	0	0	0	2
holdsji01	1874	1	PH2	NA	57	285	60	97	8	9	0	37	1	2	1	0
jones01	1874	1	BL1	NA	2	7	0	1	0	0	0	1	0	0	0	0
kesslhe01	1874	1	BR2	NA	14	56	8	17	1	0	0	4	0	0	0	2
knowdja01	1874	1	BR2	NA	24	86	8	12	1	1	0	3	1	0	1	3
kohlehe01	1874	1	BL1	NA	2	4	0	0	0	0	0	0	0	0	0	0
ledwimi01	1874	1	BR2	NA	1	4	1	1	0	0	0	1	0	0	0	0
leonaan01	1874	1	BS1	NA	71	339	68	108	18	4	0	51	11	3	2	2
mackde01	1874	1	PH2	NA	56	246	48	51	8	4	0	22	4	0	2	3
malonfe01	1874	1	CH2	NA	47	223	33	56	5	0	0	29	2	1	4	0
mannija01	1874	1	BL1	NA	42	174	32	61	8	2	0	18	0	0	2	2
mannija01	1874	2	HR1	NA	1	5	1	1	0	0	0	0	0	0	0	0
martial01	1874	1	BR2	NA	7	29	1	4	0	0	0	1	0	0	0	1
mathebo01	1874	1	NY2	NA	65	298	46	72	6	1	0	30	2	0	3	3
mcbridi01	1874	1	PH1	NA	55	263	30	57	7	1	0	34	1	0	1	5
mcgeami01	1874	1	PH1	NA	54	271	61	87	10	2	0	22	10	2	1	2
mcgeepa01	1874	1	BR2	NA	16	65	4	11	1	0	0	6	0	0	0	3
mckenfr01	1874	1	PH2	NA	1	4	0	0	0	0	0	0	0	0	0	1
mcmuljo01	1874	1	PH1	NA	55	260	61	90	10	2	2	32	4	3	8	12
mcveyca01	1874	1	BS1	NA	70	343	91	123	21	6	3	71	5	0	1	3
meyerle01	1874	1	CH2	NA	53	254	65	100	19	1	1	47	3	1	3	4
milleto01	1874	1	PH1	NA	4	16	1	8	0	0	0	5	0	0	0	0
millsev01	1874	1	HR1	NA	53	243	39	69	6	1	0	17	0	1	4	2
murnati01	1874	1	PH1	NA	21	82	11	17	2	0	0	11	0	1	1	3
nelsoca01	1874	1	NY2	NA	65	297	55	73	7	5	0	32	6	0	9	5
oneal01	1874	1	HR1	NA	1	3	0	0	0	0	0	0	0	0	0	1
orourji01	1874	1	BS1	NA	70	331	82	104	15	8	5	61	11	1	4	5
paborch01	1874	1	PH2	NA	17	77	11	17	0	1	0	1	0	1	0	0
patteda01	1874	1	NY2	NA	1	5	1	2	0	0	0	2	0	0	0	0
pearcdi01	1874	1	BR2	NA	56	255	48	75	1	0	0	25	1	0	6	1
peterjo01	1874	1	CH2	NA	55	239	39	69	10	0	1	25	2	2	2	11
phelpne01	1874	1	NY2	NA	6	24	5	3	0	0	0	2	0	0	0	0
pikeli01	1874	1	HR1	NA	52	234	58	83	22	5	1	51	3	1	5	0
quinl01	1874	1	PH2	NA	1	4	0	1	0	0	0	1	0	0	0	0
radcljo01	1874	1	PH2	NA	23	103	20	25	7	0	1	14	1	1	2	0
reachal01	1874	1	PH1	NA	14	55	8	7	2	0	0	2	0	0	0	4
reedhu01	1874	1	BL1	NA	1	4	0	0	0	0	0	0	0	0	0	0
remseja01	1874	1	NY2	NA	64	284	52	65	9	3	2	37	6	0	0	5
revilhe01	1874	1	BL1	NA	1	4	0	0	0	0	0	0	0	0	0	0
ryanjo01	1874	1	BL1	NA	47	182	29	35	8	1	0	19	3	0	5	13
saylo01	1874	1	BL1	NA	18	66	4	14	3	0	0	5	0	0	0	1
schafha01	1874	1	BS1	NA	71	327	69	87	10	2	1	45	2	4	1	5
selmafr01	1874	1	BL1	NA	12	54	9	16	3	2	0	5	2	0	0	2
senseco01	1874	1	PH1	NA	5	16	3	3	0	0	0	2	0	0	0	0
shaffor01	1874	1	HR1	NA	9	35	6	8	0	0	1	3	0	0	0	3
shaffor01	1874	2	NY2	NA	1	5	1	1	0	0	0	0	0	0	0	0
smilebi01	1874	1	BL1	NA	2	7	0	0	0	0	0	0	0	0	0	0
smithjo01	1874	1	BL1	NA	6	21	1	4	1	0	0	1	0	0	0	1
snowch01	1874	1	BR2	NA	1	1	0	1	0	0	0	0	0	0	0	0
snydepo01	1874	1	BL1	NA	39	151	24	33	4	0	1	17	0	0	1	2
spaldal01	1874	1	BS1	NA	71	362	80	119	13	1	0	54	2	1	3	0
startjo01	1874	1	NY2	NA	63	306	67	96	13	3	2	45	5	0	4	0
stearbi01	1874	1	HR1	NA	33	132	16	21	1	0	0	9	0	0	7	7
suttoez01	1874	1	PH1	NA	55	243	54	71	10	3	0	28	6	4	0	2
sweasch01	1874	1	BL1	NA	8	33	2	8	0	0	0	4	0	0	2	0
sweasch01	1874	2	BR2	NA	10	44	4	5	1	0	0	3	0	0	0	0
tayloza01	1874	1	BL1	NA	13	48	3	12	0	0	0	3	0	0	0	1
tippeji01	1874	1	HR1	NA	45	197	36	60	8	0	0	20	0	1	1	7
treacfr01	1874	1	CH2	NA	35	148	18	28	5	0	0	12	4	4	2	6
westbi01	1874	1	BR2	NA	9	35	4	8	1	0	0	2	0	0	1	2
whitede01	1874	1	BS1	NA	70	353	75	106	5	7	3	52	1	1	4	0
whitewa01	1874	1	BL1	NA	45	212	21	57	1	0	0	18	1	0	1	2
wood01	1874	1	BL1	NA	1	5	0	0	0	0	0	0	0	0	0	1
wrighge01	1874	1	BS1	NA	60	313	76	103	10	15	2	44	2	0	5	6
wrighha01	1874	1	BS1	NA	40	184	44	58	4	2	2	27	1	0	4	2
yorkto01	1874	1	PH2	NA	50	224	36	56	4	7	0	37	1	0	5	4
zettlge01	1874	1	CH2	NA	57	244	26	47	7	0	0	18	0	0	1	5
abadijo01	1875	1	PH3	NA	11	45	3	10	0	0	0	4	1	0	0	3
abadijo01	1875	2	BR2	NA	1	4	1	1	0	0	0	1	0	0	0	0
addybo01	1875	1	PH2	NA	69	310	60	80	8	4	0	43	16	8	0	2
allisar01	1875	1	WS6	NA	26	112	18	24	3	1	0	3	6	0	1	2
allisar01	1875	2	HR1	NA	40	175	26	42	4	1	1	19	1	2	0	3
allisdo01	1875	1	HR1	NA	61	269	38	67	7	0	0	21	2	0	6	3
ansonca01	1875	1	PH1	NA	69	326	84	106	15	3	0	58	11	6	4	2
arundha01	1875	1	BR2	NA	1	4	0	0	0	0	0	0	0	0	0	0
banckst01	1875	1	NH1	NA	19	72	3	11	0	0	0	2	1	0	0	3
barloto01	1875	1	NH1	NA	1	5	1	1	0	0	0	0	0	0	0	0
barloto01	1875	2	BR2	NA	1	4	0	0	0	0	0	0	0	0	0	0
barnero01	1875	1	BS1	NA	78	393	115	143	20	4	1	58	29	6	7	3
barnibi01	1875	1	KEO	NA	10	36	3	4	1	0	0	2	0	0	0	3
barnibi01	1875	2	NY2	NA	9	34	1	5	0	0	0	1	0	0	1	0
battijo01	1875	1	SL2	NA	67	284	31	71	6	3	0	33	15	3	0	6
bealsto01	1875	1	BS1	NA	35	155	38	41	2	6	0	16	1	0	3	1
bechtge01	1875	1	PH3	NA	14	61	12	17	5	0	0	7	0	0	1	1
bechtge01	1875	2	PH1	NA	35	164	33	46	6	2	0	20	2	0	1	3
bielaos01	1875	1	CH2	NA	51	201	21	48	1	0	0	11	5	5	2	5
blongjo01	1875	1	SL1	NA	16	68	3	10	2	0	0	5	1	0	0	7
bolan01	1875	1	BR2	NA	1	4	0	0	0	0	0	0	0	0	0	0
bondto01	1875	1	HR1	NA	72	289	32	77	11	3	0	33	5	1	0	5
booth01	1875	1	NH1	NA	1	2	0	0	0	0	0	0	0	0	0	1
boothed01	1875	1	NY2	NA	68	281	33	56	3	4	0	18	4	3	0	2
bordejo01	1875	1	PH2	NA	7	28	3	3	0	0	0	1	0	0	0	1
boydbi01	1875	1	BR2	NA	36	151	14	44	11	0	1	10	0	0	1	0
bradlge01	1875	1	SL2	NA	60	254	28	62	7	3	0	24	3	3	1	19
brady01	1875	1	CH2	NA	1	4	1	1	0	1	0	0	0	0	0	0
bradyst01	1875	1	WS6	NA	21	91	7	13	0	0	0	3	5	0	0	4
bradyst01	1875	2	HR1	NA	1	4	0	0	0	0	0	0	0	0	0	1
brannmi01	1875	1	CH2	NA	2	9	2	1	0	0	0	0	2	0	0	0
brownol01	1875	1	BR2	NA	3	10	0	0	0	0	0	0	0	0	0	0
burdoja01	1875	1	HR1	NA	74	350	72	103	12	5	0	35	20	11	3	13
bushodo01	1875	1	BR2	NA	1	5	0	3	0	1	0	0	0	0	0	0
carbijo01	1875	1	KEO	NA	10	36	0	3	0	0	0	2	0	0	0	1
careyto01	1875	1	HR1	NA	86	382	63	101	6	2	0	38	13	3	1	3
cassijo01	1875	1	BR2	NA	41	166	14	29	3	2	1	6	0	0	0	4
cassijo01	1875	2	NH1	NA	6	22	3	3	1	0	0	1	0	1	0	1
chapmja01	1875	1	SL2	NA	43	195	28	44	5	3	0	30	4	1	1	7
clackbo01	1875	1	BR2	NA	17	59	1	6	0	0	0	1	0	0	0	3
clappjo01	1875	1	PH1	NA	60	292	65	77	8	7	0	39	9	5	7	1
clintji01	1875	1	BR2	NA	22	81	3	10	0	0	0	0	0	0	0	0
coonwi01	1875	1	PH1	NA	4	12	1	2	0	0	0	1	1	0	0	0
cranefr01	1875	1	BR2	NA	21	81	7	17	1	0	0	4	0	0	0	4
cravebi01	1875	1	PH3	NA	14	65	8	18	4	2	0	5	1	0	2	4
cravebi01	1875	2	PH1	NA	54	260	71	83	11	11	2	40	8	4	4	5
croftar01	1875	1	SL1	NA	19	75	5	15	3	0	0	2	5	1	0	2
crowlbi01	1875	1	PH2	NA	9	37	4	3	0	0	0	3	0	0	1	0
cummica01	1875	1	HR1	NA	53	221	30	44	7	2	0	15	1	0	3	11
cuthbne01	1875	1	SL2	NA	68	319	68	78	9	2	0	17	18	1	3	8
dailejo01	1875	1	WS6	NA	27	110	16	20	5	4	0	13	3	2	0	1
dailejo01	1875	2	BR2	NA	2	8	3	1	0	0	0	0	0	0	0	1
dehlmhe01	1875	1	SL2	NA	67	254	42	57	12	2	0	14	23	9	11	21
devliji01	1875	1	CH2	NA	69	318	60	92	17	6	0	40	6	1	4	4
dillojo01	1875	1	SL1	NA	1	1	0	0	0	0	0	0	0	0	0	0
dillopa01	1875	1	SL1	NA	3	13	1	3	1	0	0	1	0	0	0	0
dolele01	1875	1	NH1	NA	1	4	1	2	0	0	0	0	0	0	0	0
doschhe01	1875	1	WS6	NA	22	81	5	15	4	0	0	5	1	0	0	6
edwar01	1875	1	BR2	NA	1	5	1	1	0	0	0	0	0	0	0	0
eggleda01	1875	1	PH1	NA	66	295	66	89	13	7	0	33	6	5	1	10
ellicjo01	1875	1	SL1	NA	7	27	1	6	1	0	0	1	1	0	0	1
evans01	1875	1	NH1	NA	1	4	1	2	0	0	0	1	0	0	0	0
fergubo01	1875	1	HR1	NA	85	366	65	88	10	4	0	43	2	1	3	5
fieldsa01	1875	1	PH3	NA	3	11	2	1	0	0	0	0	0	0	0	0
fieldsa01	1875	2	WS6	NA	5	16	0	5	0	0	0	1	1	0	0	1
fishech01	1875	1	PH2	NA	41	177	26	41	3	1	0	11	4	3	1	6
fislewe01	1875	1	PH1	NA	58	268	54	74	13	3	0	31	1	4	4	4
fleetfr01	1875	1	SL2	NA	4	16	1	1	0	0	0	1	0	0	0	0
fleetfr01	1875	2	BR2	NA	26	111	13	25	2	0	0	9	0	0	1	1
flintsi01	1875	1	SL1	NA	17	61	4	5	0	0	0	1	2	0	1	10
foleywi01	1875	1	CH2	NA	3	12	0	3	1	0	0	1	0	0	0	2
forceda01	1875	1	PH1	NA	77	386	78	120	22	5	0	49	6	3	7	5
fulmech01	1875	1	PH2	NA	69	295	50	65	6	1	0	24	10	4	0	6
fulmewa01	1875	1	BR2	NA	1	4	1	2	0	0	0	1	0	0	0	0
galvipu01	1875	1	SL2	NA	13	46	8	6	2	1	0	2	3	0	0	1
gedneco01	1875	1	NY2	NA	68	267	30	55	12	2	0	17	2	3	0	8
geerbi01	1875	1	NH1	NA	37	164	20	40	4	1	0	9	2	2	1	4
gerhajo01	1875	1	NY2	NA	58	252	29	54	7	3	0	20	0	5	0	2
gilgahu01	1875	1	BR2	NA	2	8	2	2	0	0	0	0	0	0	0	0
gilmoji01	1875	1	WS6	NA	3	12	2	3	0	0	0	0	0	0	0	3
gilro01	1875	1	PH1	NA	2	6	0	1	0	0	0	0	0	0	0	0
glennjo01	1875	1	CH2	NA	69	308	46	75	8	0	0	27	10	2	3	6
goldemi01	1875	1	KEO	NA	13	46	6	6	0	0	0	1	0	0	0	3
goldemi01	1875	2	CH2	NA	39	155	16	40	3	0	0	14	3	2	2	10
goldsfr01	1875	1	NH1	NA	1	4	0	2	0	0	0	1	0	0	0	0
goldswa01	1875	1	KEO	NA	13	51	3	6	0	0	0	1	0	0	0	2
gouldch01	1875	1	NH1	NA	27	109	9	29	4	1	0	8	0	1	1	2
haguebi01	1875	1	SL2	NA	62	260	24	57	2	0	0	22	3	4	2	9
hallge01	1875	1	PH1	NA	77	358	71	107	10	12	4	62	8	5	3	4
halliji01	1875	1	KEO	NA	13	51	12	14	2	1	0	3	2	2	0	1
halliji01	1875	2	NY2	NA	44	203	29	58	6	3	3	21	2	2	1	2
hallji01	1875	1	KEO	NA	1	3	0	1	0	1	0	1	0	0	0	0
harbibi01	1875	1	HR1	NA	53	208	32	50	3	3	0	26	2	4	9	3
harriri01	1875	1	NH1	NA	1	4	0	2	1	0	0	1	0	1	0	0
hastisc01	1875	1	CH2	NA	65	287	43	73	9	0	0	30	13	11	9	14
hatfijo01	1875	1	NY2	NA	1	4	1	2	1	0	0	1	0	0	0	0
hautzch01	1875	1	SL1	NA	19	83	5	25	3	0	0	4	5	1	0	9
heifefr01	1875	1	BS1	NA	11	50	11	14	0	3	0	5	0	0	0	0
helli01	1875	1	BR2	NA	1	4	0	1	0	0	0	0	0	0	0	0
hicksna01	1875	1	NY2	NA	62	269	32	67	10	0	0	22	1	0	2	10
highadi01	1875	1	CH2	NA	42	208	44	49	5	3	0	12	6	2	0	0
highadi01	1875	2	NY2	NA	15	64	12	25	5	0	0	10	0	0	0	1
hinespa01	1875	1	CH2	NA	69	308	45	101	14	4	0	36	6	9	1	0
holdsji01	1875	1	NY2	NA	71	324	45	92	12	1	0	23	3	3	1	3
holliho01	1875	1	WS6	NA	19	81	8	20	1	1	0	5	2	1	1	2
jonesch01	1875	1	KEO	NA	12	47	4	13	2	4	0	10	1	1	0	5
jonesch01	1875	2	HR1	NA	1	4	1	0	0	0	0	0	0	0	0	1
keenaji01	1875	1	NH1	NA	5	13	1	1	0	0	0	0	0	0	0	0
keerlge01	1875	1	CH2	NA	6	23	2	3	0	0	0	3	0	0	0	2
kesslhe01	1875	1	BR2	NA	25	105	17	26	2	0	0	7	0	2	1	2
knighge01	1875	1	NH1	NA	1	4	0	0	0	0	0	0	0	0	0	0
knighlo01	1875	1	PH1	NA	13	47	5	6	2	0	0	2	2	0	0	2
knowdja01	1875	1	BR2	NA	43	163	17	32	2	0	0	9	0	1	1	3
lathaju01	1875	1	BS1	NA	16	78	23	21	4	0	0	13	0	0	0	2
lathaju01	1875	2	NH1	NA	20	76	6	15	1	0	0	5	6	0	0	4
leonaan01	1875	1	BS1	NA	80	396	87	127	14	6	1	74	14	8	2	6
lovetle01	1875	1	PH3	NA	6	21	2	5	1	0	0	2	0	0	1	5
lowryjo01	1875	1	WS6	NA	6	22	2	3	0	0	0	0	0	1	1	0
luffhe01	1875	1	NH1	NA	38	166	15	45	10	3	2	18	3	3	0	5
malonfe01	1875	1	PH2	NA	29	123	15	28	2	1	0	10	1	0	1	2
mannija01	1875	1	BS1	NA	77	348	71	94	11	3	1	46	5	5	2	9
martial01	1875	1	BR2	NA	6	26	1	3	0	0	0	1	0	0	0	0
masonch01	1875	1	PH3	NA	12	47	5	11	0	0	0	3	0	0	0	1
masonch01	1875	2	WS6	NA	8	33	2	3	0	0	0	1	0	0	0	3
mathebo01	1875	1	NY2	NA	70	264	23	48	6	2	0	15	1	2	2	5
mcbridi01	1875	1	PH1	NA	60	270	42	73	9	0	0	45	2	1	4	5
mcclobi01	1875	1	WS6	NA	11	40	1	7	0	0	0	4	0	1	1	2
mcgeami01	1875	1	PH2	NA	68	310	71	90	6	2	0	37	19	4	1	1
mcgeepa01	1875	1	NY2	NA	25	95	4	17	2	0	0	9	0	0	0	10
mcgeepa01	1875	2	BR2	NA	18	65	3	10	3	1	0	5	0	0	1	4
mcginti01	1875	1	PH3	NA	13	52	5	12	0	1	0	5	0	0	0	4
mcginti01	1875	2	NH1	NA	32	131	13	36	3	1	0	10	1	1	0	7
mckeljo01	1875	1	NH1	NA	43	188	26	43	3	1	0	10	3	1	5	8
mcmuljo01	1875	1	PH2	NA	54	222	33	57	9	4	2	19	6	10	5	12
mcsortr01	1875	1	SL1	NA	15	52	4	11	0	0	0	2	3	0	0	3
mcveyca01	1875	1	BS1	NA	82	389	89	138	36	9	3	87	7	0	1	5
metcaal01	1875	1	NY2	NA	8	32	2	7	0	0	0	1	2	0	0	3
meyerle01	1875	1	PH2	NA	68	301	55	95	14	8	1	54	7	2	0	2
millejo01	1875	1	KEO	NA	13	50	4	6	1	0	0	0	0	0	0	3
millejo01	1875	2	CH2	NA	15	54	1	8	0	0	0	1	0	0	0	7
milleto01	1875	1	SL2	NA	56	214	18	35	2	0	0	12	2	0	1	8
millsev01	1875	1	HR1	NA	80	342	59	89	8	4	1	48	6	4	0	3
mooremo01	1875	1	BR2	NA	21	86	5	19	4	0	0	5	0	1	0	4
morgapi01	1875	1	SL1	NA	19	69	11	18	4	0	0	1	2	1	5	4
munnho01	1875	1	BR2	NA	1	4	0	0	0	0	0	0	0	0	0	0
murnati01	1875	1	PH2	NA	69	313	71	85	5	0	1	30	30	9	7	7
nelsoca01	1875	1	NY2	NA	70	276	28	55	7	1	0	23	4	2	9	0
nichoal01	1875	1	BR2	NA	32	131	4	20	2	0	0	9	0	0	0	6
nichotr01	1875	1	NH1	NA	34	119	12	23	0	2	0	5	5	0	0	2
oneilj01	1875	1	BR2	NA	7	26	3	2	0	0	0	1	0	1	1	1
oranto01	1875	1	SL1	NA	19	81	7	15	3	1	0	10	3	2	1	1
orourji01	1875	1	BS1	NA	75	358	97	106	13	7	6	72	17	5	9	6
paborch01	1875	1	BR2	NA	42	153	14	36	2	2	0	11	0	0	1	1
paborch01	1875	2	NH1	NA	6	23	4	8	0	2	0	2	0	0	0	1
parksbi01	1875	1	WS6	NA	27	111	13	20	0	0	0	6	1	1	1	1
parksbi01	1875	2	PH2	NA	2	6	0	1	0	0	0	0	0	0	0	1
patteda01	1875	1	BR2	NA	12	45	4	9	0	0	0	4	1	0	0	0
pearcdi01	1875	1	SL2	NA	70	311	51	77	6	3	0	29	8	3	7	7
peterjo01	1875	1	CH2	NA	69	297	40	85	16	2	0	34	12	6	0	3
phelpne01	1875	1	NY2	NA	2	6	1	2	1	0	0	0	0	0	0	1
pikeli01	1875	1	SL2	NA	70	312	61	108	22	12	0	44	25	10	3	8
quinnpa01	1875	1	BR2	NA	2	8	2	1	0	0	0	0	0	0	0	0
quinnpa02	1875	1	KEO	NA	11	43	4	14	1	0	0	5	0	1	0	1
quinnpa02	1875	2	HR1	NA	5	13	1	3	0	0	0	1	0	1	1	3
quinnpa02	1875	3	CH2	NA	17	61	12	14	0	0	0	1	1	1	0	2
radcljo01	1875	1	PH3	NA	5	23	2	4	0	0	0	0	0	0	1	0
reachal01	1875	1	PH1	NA	3	14	4	4	1	0	0	1	2	1	0	0
redmobi01	1875	1	SL1	NA	19	82	12	16	2	0	0	1	3	0	2	7
remseja01	1875	1	HR1	NA	86	358	70	96	10	4	0	34	6	3	5	4
resslla01	1875	1	WS6	NA	27	108	17	21	1	0	0	5	4	0	0	4
rextewi01	1875	1	BR2	NA	1	4	0	0	0	0	0	0	0	0	0	0
richmjo01	1875	1	PH1	NA	29	125	29	25	2	0	0	12	1	0	1	4
rileybi01	1875	1	KEO	NA	8	33	4	5	1	0	0	1	0	0	1	1
rocapad01	1875	1	PH1	NA	16	69	13	12	1	0	0	4	3	2	1	7
ryanjo01	1875	1	NH1	NA	37	146	17	23	2	2	0	8	10	4	3	12
saylo01	1875	1	WS6	NA	11	38	4	10	0	0	0	2	0	0	0	7
schafha01	1875	1	BS1	NA	52	222	49	64	9	0	0	17	3	2	1	8
selmafr01	1875	1	WS6	NA	1	3	0	1	0	0	0	0	0	0	0	0
sewarge01	1875	1	SL2	NA	25	96	12	24	2	0	0	8	1	0	1	1
shaff01	1875	1	BR2	NA	1	4	0	0	0	0	0	0	0	0	0	0
shaffor01	1875	1	PH2	NA	19	70	10	17	2	1	0	6	2	0	0	4
sheri01	1875	1	BR2	NA	1	4	0	0	0	0	0	0	0	0	0	1
simmojo01	1875	1	KEO	NA	13	53	5	9	1	0	0	4	1	2	0	2
smithjo01	1875	1	NH1	NA	1	3	0	0	0	0	0	0	0	0	1	0
smithto01	1875	1	BR2	NA	3	13	0	1	0	0	0	1	0	0	0	0
snydepo01	1875	1	PH2	NA	66	263	38	64	8	2	1	25	3	8	4	4
somered01	1875	1	PH3	NA	14	57	6	13	3	0	0	6	1	0	1	3
somered01	1875	2	NH1	NA	33	136	14	29	5	0	0	7	1	2	1	3
spaldal01	1875	1	BS1	NA	74	343	68	107	15	3	0	56	2	2	3	3
startjo01	1875	1	NY2	NA	69	314	58	90	10	5	4	30	1	4	3	0
stearbi01	1875	1	WS6	NA	21	78	9	20	0	0	0	7	0	1	1	4
stevero01	1875	1	WS6	NA	1	4	0	1	0	0	0	0	0	0	0	0
stodd01	1875	1	BR2	NA	2	9	1	1	1	0	0	0	0	0	0	1
sulli01	1875	1	NH1	NA	2	8	3	3	0	0	0	2	1	0	0	1
suttoez01	1875	1	PH1	NA	75	358	83	116	11	7	1	59	13	10	1	3
sweasch01	1875	1	SL1	NA	19	76	7	13	1	0	0	4	2	4	3	1
terry01	1875	1	WS6	NA	6	22	0	4	0	1	0	2	0	0	0	1
thompan01	1875	1	WS6	NA	11	41	3	4	0	1	0	3	0	0	0	1
thompfr01	1875	1	BR2	NA	1	5	1	2	0	0	0	1	0	0	0	0
tippeji01	1875	1	NH1	NA	41	159	10	25	1	0	0	4	1	0	1	6
treacfr01	1875	1	PH3	NA	11	46	9	12	3	0	0	2	1	0	2	0
treacfr01	1875	2	PH2	NA	43	179	23	38	3	3	0	15	6	3	1	3
trenwge01	1875	1	PH3	NA	10	45	5	8	2	0	0	4	0	0	1	2
trenwge01	1875	2	NH1	NA	6	25	1	6	2	0	0	3	0	0	0	1
waittch01	1875	1	SL2	NA	30	113	14	23	10	0	0	12	3	2	2	7
walkeos01	1875	1	BR2	NA	1	2	0	0	0	0	0	0	0	0	1	0
warnefr01	1875	1	PH3	NA	14	57	11	14	4	0	0	2	0	0	1	2
waterfr01	1875	1	CH2	NA	5	20	2	6	0	0	0	3	0	1	0	2
weavesa01	1875	1	PH2	NA	1	4	1	1	1	0	0	1	0	0	0	0
whitede01	1875	1	BS1	NA	80	371	76	136	23	3	1	60	2	3	3	2
whitewa01	1875	1	CH2	NA	69	287	37	71	9	0	0	23	5	10	0	3
withech01	1875	1	WS6	NA	1	1	0	0	0	0	0	0	0	0	0	0
wrighge01	1875	1	BS1	NA	79	408	106	136	20	7	2	61	13	6	2	6
wrighha01	1875	1	BS1	NA	1	4	1	1	0	0	0	0	0	0	0	1
wrighsa01	1875	1	NH1	NA	33	127	10	24	4	0	0	5	1	0	1	1
yorkto01	1875	1	HR1	NA	86	375	68	111	14	7	0	37	7	3	3	6
zettlge01	1875	1	CH2	NA	32	133	7	29	0	0	0	9	0	0	0	5
zettlge01	1875	2	PH2	NA	21	83	10	15	0	0	0	6	1	0	0	7
addybo01	1876	1	CHN	NL	32	142	36	40	4	1	0	16			5	0
allisar01	1876	1	LS1	NL	31	130	9	27	2	1	0	10			2	6
allisdo01	1876	1	HAR	NL	44	163	19	43	4	0	0	15			3	9
andrufr01	1876	1	CHN	NL	8	36	6	11	3	0	0	2			0	5
ansonca01	1876	1	CHN	NL	66	309	63	110	9	7	2	59			12	8
barnero01	1876	1	CHN	NL	66	322	126	138	21	14	1	59			20	8
battijo01	1876	1	SL3	NL	64	283	34	85	11	4	0	46			6	6
bechtge01	1876	1	LS1	NL	14	55	2	10	1	0	0	2			0	1
bechtge01	1876	2	NY3	NL	2	10	2	3	0	0	0	0			0	0
berghjo01	1876	1	PHN	NL	1	4	0	0	0	0	0	0			0	2
bielaos01	1876	1	CHN	NL	32	139	24	29	3	0	0	10			2	3
blongjo01	1876	1	SL3	NL	62	264	30	62	7	4	0	30			2	9
bondto01	1876	1	HAR	NL	45	182	18	50	8	0	0	21			0	4
bootham01	1876	1	CN1	NL	63	272	31	71	3	0	0	14			9	11
boothed01	1876	1	NY3	NL	57	228	17	49	2	1	0	7			2	4
bordejo01	1876	1	BSN	NL	32	121	19	25	3	0	0	7			3	3
bradlfo01	1876	1	BSN	NL	22	82	12	19	2	1	0	8			2	3
bradlge01	1876	1	SL3	NL	64	265	29	66	7	6	0	28			3	12
brownle01	1876	1	BSN	NL	45	195	23	41	6	6	2	21			3	22
burdoja01	1876	1	HAR	NL	69	309	66	80	9	1	0	23			13	16
bushodo01	1876	1	PHN	NL	5	21	4	1	0	0	0	1			0	0
carbijo01	1876	1	LS1	NL	7	25	3	4	0	0	0	1			0	0
careyto01	1876	1	HAR	NL	68	289	51	78	7	0	0	26			3	4
cassijo01	1876	1	HAR	NL	12	47	6	13	2	0	0	8			1	0
chapmja01	1876	1	LS1	NL	17	67	4	16	1	0	0	5			1	3
clackbo01	1876	1	CN1	NL	32	118	10	19	0	1	0	5			5	12
clappjo01	1876	1	SL3	NL	64	298	60	91	4	2	0	29			8	2
clintji01	1876	1	LS1	NL	16	65	8	22	2	0	0	0			0	0
collida01	1876	1	LS1	NL	7	28	3	4	1	0	0	9			0	2
coonwi01	1876	1	PHN	NL	54	220	30	50	5	1	0	22			2	4
cravebi01	1876	1	NY3	NL	56	246	24	55	4	0	0	22			2	7
cummica01	1876	1	HAR	NL	24	105	14	17	3	0	0	7			0	3
currepe01	1876	1	PHN	NL	3	12	5	4	1	0	0	2			0	0
cuthbne01	1876	1	SL3	NL	63	283	46	70	10	1	0	25			7	4
deando01	1876	1	CN1	NL	34	138	9	36	3	1	0	4			2	13
dehlmhe01	1876	1	SL3	NL	64	245	40	45	6	0	0	9			9	10
devliji01	1876	1	LS1	NL	68	298	38	94	14	1	0	28			1	11
eggleda01	1876	1	PHN	NL	39	174	28	52	4	0	0	19			2	4
fairge01	1876	1	NY3	NL	1	4	0	0	0	0	0	0			0	0
fergubo01	1876	1	HAR	NL	69	310	48	82	8	5	0	32			2	11
fieldsa01	1876	1	CN1	NL	4	14	2	0	0	0	0	0			1	3
fishech01	1876	1	CN1	NL	35	129	12	32	1	0	0	4			0	8
fislewe01	1876	1	PHN	NL	59	278	42	80	15	1	1	30			2	4
foleywi01	1876	1	CN1	NL	58	221	19	50	3	2	0	9			0	14
forceda01	1876	1	PHN	NL	60	284	48	66	6	0	0	17			5	3
forceda01	1876	2	NY3	NL	1	3	0	0	0	0	0	0			0	0
fousebi01	1876	1	PHN	NL	21	89	11	12	0	1	0	2			0	0
fulmech01	1876	1	LS1	NL	66	267	28	73	9	5	1	29			1	10
gerhajo01	1876	1	LS1	NL	65	292	33	76	10	3	2	18			3	5
glennjo01	1876	1	CHN	NL	66	276	55	84	9	2	0	32			12	6
gouldch01	1876	1	CN1	NL	61	258	27	65	7	0	0	11			6	11
haguebi01	1876	1	LS1	NL	67	294	31	78	8	0	1	22			2	10
hallge01	1876	1	PHN	NL	60	268	51	98	7	13	5	45			8	4
halliji01	1876	1	NY3	NL	54	240	45	67	7	6	2	36			2	4
harbibi01	1876	1	HAR	NL	30	106	11	23	2	1	0	6			3	2
hastisc01	1876	1	LS1	NL	67	283	36	73	6	1	0	21			5	11
hatfijo01	1876	1	NY3	NL	1	4	0	1	0	0	0	1			0	0
hayesmi01	1876	1	NY3	NL	5	21	1	3	0	2	0	2			0	0
heubege01	1876	1	NY3	NL	1	4	0	0	0	0	0	0			0	0
hicksna01	1876	1	NY3	NL	45	188	20	44	4	1	0	15			3	4
highadi01	1876	1	HAR	NL	67	312	59	102	21	2	0	35			2	7
hinespa01	1876	1	CHN	NL	64	305	62	101	21	3	2	59			1	3
holbebi01	1876	1	LS1	NL	12	43	3	11	0	0	0	5			0	3
holdsji01	1876	1	NY3	NL	52	241	23	64	3	2	0	19			1	2
jonesch01	1876	1	CN1	NL	64	276	40	79	17	4	4	38			7	17
kesslhe01	1876	1	CN1	NL	59	248	26	64	5	0	0	11			7	10
knighlo01	1876	1	PHN	NL	55	240	32	60	9	3	0	24			2	2
laffefl01	1876	1	PHN	NL	1	3	0	0	0	0	0	0			0	0
larkite01	1876	1	NY3	NL	1	4	0	0	0	0	0	0			0	0
leonaan01	1876	1	BSN	NL	64	303	53	85	10	2	0	27			4	6
mackde01	1876	1	SL3	NL	48	180	32	39	5	0	1	7			11	5
malonfe01	1876	1	PHN	NL	22	96	14	22	2	0	0	6			0	1
malonjo01	1876	1	NY3	NL	2	7	1	2	0	1	0	2			0	1
mannija01	1876	1	BSN	NL	70	288	52	76	13	0	2	25			7	5
mathebo01	1876	1	NY3	NL	56	218	19	40	4	1	0	9			3	2
mcbridi01	1876	1	BSN	NL	4	16	2	3	0	0	0	4			0	0
mcgeami01	1876	1	SL3	NL	61	276	48	72	3	0	0	30			2	1
mcginti01	1876	1	BSN	NL	9	40	5	6	0	0	0	2			0	1
mcguijo01	1876	1	NY3	NL	1	4	0	0	0	0	0	0			0	0
mcveyca01	1876	1	CHN	NL	63	308	62	107	15	0	1	53			2	4
meyerle01	1876	1	PHN	NL	55	256	46	87	12	8	0	34			3	2
millsev01	1876	1	HAR	NL	63	254	28	66	8	1	0	23			1	3
morrijo01	1876	1	BSN	NL	66	278	38	73	5	2	0	26			3	5
mullejo01	1876	1	PHN	NL	1	3	0	0	0	0	0	0			0	0
murnati01	1876	1	BSN	NL	69	308	60	87	4	3	2	34			8	12
nichoal01	1876	1	NY3	NL	57	212	20	38	4	0	0	9			2	3
nichotr01	1876	1	BSN	NL	1	4	0	0	0	0	0	0			0	0
orourji01	1876	1	BSN	NL	70	312	61	102	17	3	2	43			15	17
parksbi01	1876	1	BSN	NL	1	4	0	0	0	0	0	0			0	0
paullo01	1876	1	PHN	NL	3	12	2	2	1	0	0	0			0	0
pearcdi01	1876	1	SL3	NL	25	102	12	21	1	0	0	10			3	5
pearcfr01	1876	1	LS1	NL	1	2	0	0	0	0	0	0			0	0
peterjo01	1876	1	CHN	NL	66	316	70	111	14	2	1	47			3	2
phelpne01	1876	1	NY3	NL	1	3	0	0	0	0	0	0			0	1
phelpne01	1876	2	PHN	NL	1	4	0	0	0	0	0	0			0	0
piersda01	1876	1	CN1	NL	57	233	33	55	4	1	0	13			1	9
pikeli01	1876	1	SL3	NL	63	282	55	91	19	10	1	50			8	9
remseja01	1876	1	HAR	NL	69	324	62	89	12	5	1	30			1	15
rittewh01	1876	1	PHN	NL	16	52	8	13	3	0	0	4			0	2
ryanjo01	1876	1	LS1	NL	64	241	32	61	5	1	1	18			6	23
schafha01	1876	1	BSN	NL	70	286	47	72	11	0	0	35			4	11
sewarge01	1876	1	NY3	NL	1	3	0	0	0	0	0	0			0	0
shandji01	1876	1	NY3	NL	2	8	0	1	0	0	0	0			0	0
snydepo01	1876	1	LS1	NL	56	224	21	44	4	1	1	9			2	7
snydere01	1876	1	CN1	NL	55	205	10	31	3	1	0	12			1	19
somered01	1876	1	LS1	NL	64	256	29	48	5	1	0	14			1	6
spaldal01	1876	1	CHN	NL	66	292	54	91	14	2	0	44			6	3
startjo01	1876	1	NY3	NL	56	264	40	73	6	0	0	21			1	2
suttoez01	1876	1	PHN	NL	54	236	45	70	12	7	1	31			3	2
sweasch01	1876	1	CN1	NL	56	225	18	46	5	2	0	10			2	5
treacfr01	1876	1	NY3	NL	57	256	47	54	5	1	0	18			1	5
treacpe01	1876	1	NY3	NL	2	5	1	0	0	0	0	0			1	0
valenbo01	1876	1	NY3	NL	1	3	0	0	0	0	0	0			0	0
wardji01	1876	1	PHN	NL	1	4	1	2	0	0	0	1			0	1
warnefr01	1876	1	PHN	NL	1	3	0	0	0	0	0	0			0	0
westbi01	1876	1	NY3	NL	1	4	0	0	0	0	0	0			0	0
whitede01	1876	1	CHN	NL	66	303	66	104	18	1	1	60			7	3
whitnfr01	1876	1	BSN	NL	34	139	27	33	7	1	0	15			1	3
willida01	1876	1	CN1	NL	9	35	1	7	0	0	0	1			0	4
wrighge01	1876	1	BSN	NL	70	335	72	100	18	6	1	34			8	9
wrighha01	1876	1	BSN	NL	1	3	0	0	0	0	0	0			0	1
wrighsa01	1876	1	BSN	NL	2	8	0	1	0	0	0	0			0	0
yorkto01	1876	1	HAR	NL	67	263	47	68	12	7	1	39			10	4
zettlge01	1876	1	PHN	NL	32	128	11	27	2	1	0	11			0	5
addybo01	1877	1	CN1	NL	57	245	27	68	2	3	0	31			6	5
allisdo01	1877	1	HAR	NL	29	115	14	17	2	0	0	6			3	7
ansonca01	1877	1	CHN	NL	59	255	52	86	19	1	0	32			9	3
barnero01	1877	1	CHN	NL	22	92	16	25	1	0	0	5			7	4
bassjo01	1877	1	HAR	NL	1	4	1	1	0	0	0	0			0	0
battijo01	1877	1	SL3	NL	57	226	28	45	3	7	1	22			6	17
blongjo01	1877	1	SL3	NL	58	218	17	47	8	3	0	13			4	22
bondto01	1877	1	BSN	NL	61	259	32	59	4	3	0	30			1	15
bootham01	1877	1	CN1	NL	44	157	16	27	2	1	0	13			12	10
bradlge01	1877	1	CHN	NL	55	214	31	52	7	3	0	12			6	19
brownle01	1877	1	BSN	NL	58	221	27	56	12	8	1	31			6	33
buncejo01	1877	1	HAR	NL	1	4	0	0	0	0	0	0			0	0
burdoja01	1877	1	HAR	NL	58	277	35	72	6	0	0	9			2	16
careyto01	1877	1	HAR	NL	60	274	38	70	3	2	1	20			0	9
cassijo01	1877	1	HAR	NL	60	251	43	95	10	5	0	27			3	3
clappjo01	1877	1	SL3	NL	60	255	47	81	6	6	0	34			8	6
cravebi01	1877	1	LS1	NL	57	238	33	63	5	2	0	29			5	11
croftar01	1877	1	SL3	NL	54	220	23	51	5	2	0	27			1	15
crowlbi01	1877	1	LS1	NL	61	238	30	67	9	3	1	23			4	13
cummica01	1877	1	CN1	NL	19	70	6	14	1	2	0	4			4	6
cuthbne01	1877	1	CN1	NL	12	56	6	10	5	0	0	2			1	2
dehlmhe01	1877	1	SL3	NL	32	119	24	22	4	0	0	11			7	21
devliji01	1877	1	LS1	NL	61	268	38	72	6	3	1	27			7	27
dorgami01	1877	1	SL3	NL	60	266	45	82	9	7	0	23			9	13
edench01	1877	1	CHN	NL	15	55	9	12	0	1	0	5			3	6
eggleda01	1877	1	CHN	NL	33	136	20	36	3	0	0	20			1	5
fergubo01	1877	1	HAR	NL	58	254	40	65	7	2	0	35			3	10
fishech01	1877	1	CHN	NL	1	4	0	0	0	0	0	0			0	2
foleywi01	1877	1	CN1	NL	56	216	23	41	5	1	0	18			4	13
forceda01	1877	1	SL3	NL	58	225	24	59	5	3	0	22			11	15
gerhajo01	1877	1	LS1	NL	59	250	41	76	6	5	1	35			5	8
gleasja01	1877	1	SL3	NL	1	4	0	1	0	0	0	0			0	1
glennjo01	1877	1	CHN	NL	50	202	31	46	6	1	0	20			8	16
gouldch01	1877	1	CN1	NL	24	91	5	25	2	1	0	13			5	5
haguebi01	1877	1	LS1	NL	59	263	38	70	7	1	1	24			7	18
haldejo01	1877	1	LS1	NL	1	4	0	0	0	0	0	0			0	0
hallge01	1877	1	LS1	NL	61	269	53	87	15	8	0	26			12	19
halliji01	1877	1	CN1	NL	16	73	18	27	1	1	0	7			1	1
halliji01	1877	2	CHN	NL	19	89	17	25	4	1	0	11			4	2
harbibi01	1877	1	HAR	NL	41	167	18	37	5	2	0	8			3	6
hastisc01	1877	1	CN1	NL	20	71	7	10	1	0	0	3			3	6
hicksna01	1877	1	CN1	NL	8	32	3	6	0	0	0	3			1	2
hinespa01	1877	1	CHN	NL	60	261	44	73	11	7	0	23			1	8
holdsji01	1877	1	HAR	NL	55	260	26	66	5	2	0	20			2	8
jonesch01	1877	1	CN1	NL	17	69	16	21	3	3	1	10	0	0	4	8	0	0	0
jonesch01	1877	2	CHN	NL	2	8	1	3	1	0	0	2			1	0
jonesch01	1877	3	CN1	NL	38	163	36	51	8	7	1	26			10	17
kesslhe01	1877	1	CN1	NL	6	20	0	2	0	0	0	0			2	1
laffefl01	1877	1	LS1	NL	4	17	2	1	1	0	0	0			0	4
larkite01	1877	1	HAR	NL	58	228	28	52	6	5	1	18			5	23
lathaju01	1877	1	LS1	NL	59	278	42	81	10	6	0	22			5	6
leele01	1877	1	SL3	NL	4	18	0	5	1	0	0	0			0	1
leonaan01	1877	1	BSN	NL	58	272	46	78	5	0	0	27			5	5
littlha01	1877	1	SL3	NL	3	12	2	2	0	0	0	0			1	6
littlha01	1877	2	LS1	NL	1	3	0	0	0	0	0	0			1	1
loftuto01	1877	1	SL3	NL	3	11	2	2	0	0	0	0			0	1
malonjo01	1877	1	HAR	NL	1	4	0	1	0	0	0	0			0	0
mannija01	1877	1	CN1	NL	57	252	47	80	16	7	0	36			5	6
mathebo01	1877	1	CN1	NL	15	59	5	10	0	0	0	0			1	2
mcgeami01	1877	1	SL3	NL	57	258	35	65	3	2	0	20			2	6
mckenpa01	1877	1	SL3	NL	1	5	0	1	0	0	0	0			0	1
mcveyca01	1877	1	CHN	NL	60	266	58	98	9	7	0	36			8	11
meyerle01	1877	1	CN1	NL	27	107	11	35	7	2	0	15			0	4
millege01	1877	1	CN1	NL	11	37	4	6	1	0	0	3			5	2
mitchbo01	1877	1	CN1	NL	13	49	5	10	3	0	0	5			1	2
morrijo01	1877	1	BSN	NL	61	242	47	73	5	1	0	28			6	15
murnati01	1877	1	BSN	NL	35	140	23	39	7	1	1	15			6	7
newelte01	1877	1	SL3	NL	1	3	0	0	0	0	0	0			0	0
nichoal01	1877	1	LS1	NL	6	19	1	4	0	1	0	0			0	2
nichotr01	1877	1	SL3	NL	51	186	22	31	4	2	0	9			3	15
orourji01	1877	1	BSN	NL	61	265	68	96	14	4	0	23			20	9
pearcdi01	1877	1	SL3	NL	8	29	1	5	0	0	0	4			1	4
peterjo01	1877	1	CHN	NL	60	265	45	84	10	3	0	41			1	7
pikeja01	1877	1	HAR	NL	1	4	0	1	0	0	0	0			0	0
pikeli01	1877	1	CN1	NL	58	262	45	78	12	4	4	23			9	7
quinnpa02	1877	1	CHN	NL	4	14	1	1	0	0	0	0			1	0
redmobi01	1877	1	CN1	NL	3	12	1	3	1	0	0	3			1	1
reisla01	1877	1	CHN	NL	4	16	3	2	0	0	0	1			0	0
remseja01	1877	1	SL3	NL	33	123	14	32	3	4	0	13			4	3
roweda01	1877	1	CHN	NL	2	7	0	2	0	0	0	0			0	3
ryanjo01	1877	1	CN1	NL	6	26	2	4	0	1	0	2			1	5
schafha01	1877	1	BSN	NL	33	141	20	39	5	2	0	13			0	7
shaffor01	1877	1	LS1	NL	61	260	38	74	9	5	3	34			9	17
smithha01	1877	1	CHN	NL	24	94	7	19	1	0	0	3			4	6
smithha01	1877	2	CN1	NL	10	36	4	9	2	1	0	3			1	5
snydepo01	1877	1	LS1	NL	61	248	23	64	7	2	2	28			3	14
spaldal01	1877	1	CHN	NL	60	254	29	65	7	6	0	35			3	16
startjo01	1877	1	HAR	NL	60	271	55	90	3	6	1	21			6	2
sullich01	1877	1	CN1	NL	8	32	4	8	0	0	0	4			1	0
suttoez01	1877	1	BSN	NL	58	253	43	74	10	6	0	39			4	10
tayloli01	1877	1	HAR	NL	2	8	0	3	0	0	0	0			0	2
waittch01	1877	1	CHN	NL	10	41	2	4	0	0	0	2			0	3
whitede01	1877	1	BSN	NL	59	266	51	103	14	11	2	49			8	3
whitewi01	1877	1	BSN	NL	3	15	4	3	0	0	0	1			0	1
wrighge01	1877	1	BSN	NL	61	290	58	80	15	1	0	35			9	15
wrighha01	1877	1	BSN	NL	1	4	0	0	0	0	0	0			0	1
yorkto01	1877	1	HAR	NL	56	237	43	67	16	7	1	37			3	11
allisdo01	1878	1	PRO	NL	19	76	9	22	2	0	0	7			1	8
ansonca01	1878	1	CHN	NL	60	261	55	89	12	2	0	40			13	1
bennech01	1878	1	ML2	NL	49	184	16	45	9	0	1	12			10	26
blissfr01	1878	1	ML2	NL	2	8	1	1	0	0	0	0			0	0
bondto01	1878	1	BSN	NL	59	236	22	50	4	1	0	23			0	9
brownle01	1878	1	PRO	NL	58	243	44	74	21	6	1	43			7	37
burdoja01	1878	1	BSN	NL	60	246	37	64	12	6	0	25			3	17
careyto01	1878	1	PRO	NL	61	253	33	60	10	3	0	24			0	14
cassijo01	1878	1	CHN	NL	60	256	33	68	7	1	0	29			9	11
clappjo01	1878	1	IN1	NL	63	263	42	80	10	2	0	29			13	8
coreyfr01	1878	1	PRO	NL	7	21	3	3	0	0	0	1			0	2
creamge01	1878	1	ML2	NL	50	193	30	41	7	3	0	15			5	15
croftar01	1878	1	IN1	NL	60	222	22	35	6	0	0	16			5	23
dalryab01	1878	1	ML2	NL	61	271	52	96	10	4	0	15			6	29
dickebu01	1878	1	CN1	NL	29	123	17	38	5	1	0	9			0	7
ellicjo01	1878	1	ML2	NL	3	13	2	2	0	0	0	1			0	1
fergubo01	1878	1	CHN	NL	61	259	44	91	10	2	0	39			10	12
fishech01	1878	1	PRO	NL	1	3	0	0	0	0	0	0			0	0
flintsi01	1878	1	IN1	NL	63	254	23	57	7	0	0	18			2	15
foleywi01	1878	1	ML2	NL	56	229	33	62	8	5	0	22			7	14
geerbi01	1878	1	CN1	NL	61	237	31	52	13	2	0	20			10	18
gerhajo01	1878	1	CN1	NL	60	259	46	77	7	2	0	28			7	14
goldemi01	1878	1	ML2	NL	55	214	16	44	6	3	0	20			3	35
goodmja01	1878	1	ML2	NL	60	252	28	62	4	3	1	27			7	33
haguebi01	1878	1	PRO	NL	62	250	21	51	3	0	0	25			5	34
halliji01	1878	1	CHN	NL	16	67	14	19	3	0	0	2			5	6
halliji01	1878	2	IN1	NL	3	12	0	3	2	0	0	1			0	2
hankifr01	1878	1	CHN	NL	58	240	38	64	8	3	1	27			5	36
harbibi01	1878	1	CHN	NL	54	240	32	71	12	0	0	37			6	13
healeto01	1878	1	PRO	NL	3	9	0	2	1	0	0	2			0	4
healeto01	1878	2	IN1	NL	12	45	2	8	1	0	0	4			0	14
highadi01	1878	1	PRO	NL	62	281	60	90	22	1	1	29			5	16
hinespa01	1878	1	PRO	NL	62	257	42	92	13	4	4	50			2	10
holbebi01	1878	1	ML2	NL	45	173	10	32	2	0	0	12			3	14
jennial01	1878	1	ML2	NL	1	2	0	0	0	0	0	0			1	0
jonesch01	1878	1	CN1	NL	61	261	50	81	11	7	3	39			4	17
kellyki01	1878	1	CN1	NL	60	237	29	67	7	1	0	27			7	7
knowdja01	1878	1	ML2	NL	4	14	2	3	1	0	0	2			0	3
larkite01	1878	1	CHN	NL	58	226	33	65	9	4	0	32			17	17
leonaan01	1878	1	BSN	NL	60	262	41	68	8	5	0	16			3	19
mannija01	1878	1	BSN	NL	60	248	41	63	10	1	0	23			10	16
mcclebi01	1878	1	CHN	NL	48	205	26	46	6	1	0	29			2	13
mccorji01	1878	1	IN1	NL	15	56	5	8	1	0	0	0			0	2
mckelru01	1878	1	IN1	NL	63	253	33	57	4	3	2	36			5	38
mcveyca01	1878	1	CN1	NL	61	271	43	83	10	4	2	28			5	10
mitchbo01	1878	1	CN1	NL	13	49	4	12	0	0	0	8			1	4
morgapi01	1878	1	ML2	NL	14	56	2	11	0	0	0	5			3	9
morrijo01	1878	1	BSN	NL	60	233	26	56	5	1	0	23			5	16
murnati01	1878	1	PRO	NL	49	188	35	45	6	1	0	14			8	12
nelsoca01	1878	1	IN1	NL	19	84	12	11	1	0	0	5			5	11
nichotr01	1878	1	PRO	NL	11	49	2	9	2	0	0	2			2	10
nolanth01	1878	1	IN1	NL	38	152	11	37	8	0	0	16			2	10
orourji01	1878	1	BSN	NL	60	255	44	71	17	7	1	29			5	21
peterjo01	1878	1	ML2	NL	55	246	33	76	6	1	0	22			5	8
pikeli01	1878	1	CN1	NL	31	145	28	47	5	1	0	11			4	9
pikeli01	1878	2	PRO	NL	5	22	4	5	0	1	0	4			1	1
powerph01	1878	1	CHN	NL	8	31	2	5	1	1	0	2			1	5
questjo01	1878	1	IN1	NL	62	278	45	57	3	2	0	13			12	24
redmobi01	1878	1	ML2	NL	48	187	16	43	8	0	0	21			8	13
reisla01	1878	1	CHN	NL	5	20	2	3	0	0	0	0			1	6
remseja01	1878	1	CHN	NL	56	224	32	52	11	1	1	19			17	33
schafha01	1878	1	BSN	NL	2	8	0	1	0	0	0	0			0	1
shaffor01	1878	1	IN1	NL	63	266	48	90	19	6	0	30			13	20
snydepo01	1878	1	BSN	NL	60	226	21	48	5	0	0	14			1	19
spaldal01	1878	1	CHN	NL	1	4	0	2	0	0	0	0			0	0
startjo01	1878	1	CHN	NL	61	285	58	100	12	5	1	27			2	3
sullibi01	1878	1	CHN	NL	2	6	1	1	0	0	0	0			0	0
sullich01	1878	1	CN1	NL	61	244	29	63	4	2	0	20			2	9
suttoez01	1878	1	BSN	NL	60	239	31	54	9	3	1	29			2	14
sweasch01	1878	1	PRO	NL	55	212	23	37	3	0	0	8			7	23
traffbi01	1878	1	CHN	NL	2	9	1	1	0	0	0	1			0	1
wardjo01	1878	1	PRO	NL	37	138	14	27	5	4	1	15			2	13
warnefr01	1878	1	IN1	NL	43	165	19	41	4	0	0	10			2	15
weavesa01	1878	1	ML2	NL	48	170	15	34	4	1	0	3			11	14
wheelha01	1878	1	PRO	NL	7	27	7	4	0	0	0	1			2	15
whitede01	1878	1	CN1	NL	61	258	41	81	4	1	0	29			10	5
whitewi01	1878	1	CN1	NL	52	197	15	28	1	1	0	9			8	41
willine01	1878	1	IN1	NL	63	250	31	58	10	2	1	19			5	15
wrighge01	1878	1	BSN	NL	59	267	35	60	5	1	0	12			6	22
yorkto01	1878	1	PRO	NL	62	269	56	83	19	10	1	26			8	19
adamsge01	1879	1	SR1	NL	4	13	0	3	0	0	0	0			1	1
allenja01	1879	1	SR1	NL	11	48	7	9	2	1	0	3			1	5
allenja01	1879	2	CL2	NL	16	60	7	7	1	1	0	4			1	9
allisdo01	1879	1	PRO	NL	1	5	0	0	0	0	0	0			0	1
ansonca01	1879	1	CHN	NL	51	227	40	72	20	1	0	34			2	2
barnero01	1879	1	CN1	NL	77	323	55	86	9	2	1	30			16	25
bondto01	1879	1	BSN	NL	65	257	35	62	3	1	0	21			6	8
bradlge01	1879	1	TRN	NL	63	251	36	62	9	5	0	23			1	20
broutda01	1879	1	TRN	NL	39	168	17	46	12	1	4	17			1	18
brownle01	1879	1	PRO	NL	53	229	23	59	13	4	2	38			4	24
brownle01	1879	2	CHN	NL	6	21	2	6	1	0	0	3			1	4
burdoja01	1879	1	BSN	NL	84	359	64	86	10	3	0	36			9	28
burkemi01	1879	1	CN1	NL	28	117	13	26	3	0	0	8			2	5
careyto01	1879	1	CL2	NL	80	335	30	80	14	1	0	32			5	20
carpehi01	1879	1	SR1	NL	65	261	30	53	6	0	0	20			2	15
caskied01	1879	1	TRN	NL	70	304	32	78	13	2	0	21			2	14
cassijo01	1879	1	TRN	NL	9	37	4	7	1	0	0	1			2	4
clappaa01	1879	1	TRN	NL	36	146	24	39	9	3	0	18			6	10
clappjo01	1879	1	BFN	NL	70	292	47	77	12	5	1	36			11	11
cogswed01	1879	1	BSN	NL	49	236	51	76	8	1	1	18			8	5
creamge01	1879	1	SR1	NL	15	60	3	13	2	0	0	3			1	2
crowlbi01	1879	1	BFN	NL	60	261	41	75	9	5	0	30			6	14
dalryab01	1879	1	CHN	NL	71	333	47	97	25	1	0	23			4	29
deckefr01	1879	1	SR1	NL	3	10	0	1	0	0	0	0			0	3
dickebu01	1879	1	CN1	NL	81	350	73	102	18	14	2	57			3	27
dolanto01	1879	1	CHN	NL	1	4	0	0	0	0	0	0			0	2
dorgami01	1879	1	SR1	NL	59	270	38	72	11	5	1	17			4	13
doschhe01	1879	1	TRN	NL	47	191	16	42	8	0	0	18			2	10
doschhe01	1879	2	CHN	NL	3	11	1	2	0	0	0	1			0	3
edench01	1879	1	CL2	NL	81	353	40	96	31	7	3	34			6	20
eggleda01	1879	1	BFN	NL	78	317	41	66	5	7	0	27			11	41
evansja01	1879	1	TRN	NL	72	280	30	65	9	5	0	17			5	18
farreja02	1879	1	SR1	NL	54	241	40	73	6	2	1	21			3	13
farreja02	1879	2	PRO	NL	12	51	5	13	2	0	0	5			0	0
fergubo01	1879	1	TRN	NL	30	123	18	31	5	2	0	4			4	3
flintsi01	1879	1	CHN	NL	79	324	46	92	22	6	1	41			6	44
foleycu01	1879	1	BSN	NL	35	146	16	46	3	1	0	17			3	4
foleywi01	1879	1	CN1	NL	56	218	22	46	5	1	0	25			2	16
forceda01	1879	1	BFN	NL	79	316	36	66	5	2	0	8			13	37
fulmech01	1879	1	BFN	NL	76	306	30	82	11	5	0	28			5	34
galvipu01	1879	1	BFN	NL	67	265	34	66	11	6	0	27			1	56
gardngi01	1879	1	TRN	NL	2	6	1	1	0	0	0	0			0	0
gerhajo01	1879	1	CN1	NL	79	313	22	62	12	3	1	39			3	19
gilliba01	1879	1	CL2	NL	52	205	20	35	6	2	0	11			0	13
glassja01	1879	1	CL2	NL	80	325	31	68	9	3	0	29			6	24
goldsfr01	1879	1	TRN	NL	9	38	6	9	1	0	0	2			1	3
gorege01	1879	1	CHN	NL	63	266	43	70	17	4	0	32			8	30
grossem01	1879	1	PRO	NL	30	132	31	46	9	5	0	24			4	8
gunklfr01	1879	1	CL2	NL	1	3	1	0	0	0	0	0			0	1
haguebi01	1879	1	PRO	NL	51	209	20	47	3	1	0	21			3	19
hallal01	1879	1	TRN	NL	67	306	30	79	7	3	0	14			3	13
hankifr01	1879	1	CHN	NL	44	171	14	31	4	0	0	8			2	14
harbibi01	1879	1	CHN	NL	4	18	2	2	0	0	0	1			0	5
hawesbi01	1879	1	BSN	NL	38	155	19	31	3	3	0	9			2	13
hawketh01	1879	1	TRN	NL	64	250	24	52	6	1	0	20			4	14
hinespa01	1879	1	PRO	NL	85	409	81	146	25	10	2	52			8	16
hoffmhi01	1879	1	CL2	NL	2	6	0	0	0	0	0	0			0	3
holbebi01	1879	1	SR1	NL	59	229	11	46	0	0	0	21			1	20
holbebi01	1879	2	TRN	NL	4	15	1	4	0	0	0	2			0	1
hornujo01	1879	1	BFN	NL	78	319	46	85	18	7	0	38			2	27
hotalpe01	1879	1	CN1	NL	81	369	64	103	20	9	1	27			12	17
houcksa01	1879	1	BSN	NL	80	356	69	95	24	9	2	49			4	11
jonesch01	1879	1	BSN	NL	83	355	85	112	22	10	9	62			29	38
kellyjo01	1879	1	CL2	NL	1	4	0	1	0	0	0	0			0	0
kellyki01	1879	1	CN1	NL	77	345	78	120	20	12	2	47			8	14
kellyki02	1879	1	SR1	NL	10	36	4	4	1	0	0	2			0	6
kellyki02	1879	2	TRN	NL	6	22	1	5	0	0	0	0			0	1
kemmlru01	1879	1	PRO	NL	2	7	0	1	0	0	0	0			0	1
kennedo01	1879	1	CL2	NL	49	193	19	56	8	2	1	18			2	10
larkite01	1879	1	CHN	NL	60	228	26	50	12	2	0	18			8	24
libbyst01	1879	1	BFN	NL	1	2	0	0	0	0	0	0			0	1
maculji01	1879	1	SR1	NL	64	246	24	52	9	0	0	13			3	27
magnejo01	1879	1	CN1	NL	1	4	0	0	0	0	0	1			0	1
mansemi01	1879	1	SR1	NL	67	242	24	52	4	2	1	13			5	45
manseto01	1879	1	TRN	NL	40	177	29	43	6	0	0	11			3	9
manseto01	1879	2	SR1	NL	1	4	0	1	0	0	0	0			0	0
mathebo01	1879	1	PRO	NL	43	173	25	35	2	0	1	10			7	12
mccorha01	1879	1	SR1	NL	57	230	21	51	4	1	1	21			0	22
mccorji01	1879	1	CL2	NL	75	282	35	62	10	2	0	20			1	9
mcgeami01	1879	1	PRO	NL	85	374	62	103	7	2	0	35			5	13
mcguijo01	1879	1	SR1	NL	12	51	7	15	1	1	0	4			0	6
mcgunbi01	1879	1	BFN	NL	47	171	22	30	0	1	0	5			5	24
mcmanpa01	1879	1	TRN	NL	2	8	0	1	0	0	0	0			0	2
mcveyca01	1879	1	CN1	NL	81	354	64	105	18	6	0	55			8	13
mitchbo01	1879	1	CL2	NL	30	109	11	16	2	2	0	6			0	14
morrijo01	1879	1	BSN	NL	84	348	56	98	18	5	0	49			14	32
neaglja01	1879	1	CN1	NL	3	12	1	2	0	0	0	2			0	0
nelsoca01	1879	1	TRN	NL	28	106	17	28	7	1	0	10			8	4
olearda01	1879	1	PRO	NL	2	7	1	3	0	0	0	2			0	0
orourji01	1879	1	PRO	NL	81	362	69	126	19	9	1	46			13	10
orourjo01	1879	1	BSN	NL	72	317	69	108	17	11	6	62			8	32
osterch01	1879	1	SR1	NL	2	8	0	0	0	0	0	0			0	0
peterjo01	1879	1	CHN	NL	83	379	45	93	13	2	1	31			1	19
phillbi01	1879	1	CL2	NL	81	365	58	99	15	4	0	29			2	20
purcebl01	1879	1	SR1	NL	63	277	32	72	6	3	0	25			3	13
purcebl01	1879	2	CN1	NL	12	50	10	11	0	0	0	4			0	3
questjo01	1879	1	CHN	NL	83	334	38	69	16	1	0	22			9	33
reillch01	1879	1	TRN	NL	62	236	17	54	5	1	0	19			1	20
remseja01	1879	1	CHN	NL	42	152	14	33	4	2	0	8			2	23
richaha01	1879	1	BFN	NL	79	336	54	95	18	10	0	37			16	30
richmjo01	1879	1	SR1	NL	62	254	31	54	8	4	1	23			4	24
richmle01	1879	1	BSN	NL	1	6	0	2	0	0	0	1			0	1
rileybi01	1879	1	CL2	NL	43	161	14	23	2	0	0	9			2	26
roweja01	1879	1	BFN	NL	8	34	8	12	1	0	0	8			0	1
salisha01	1879	1	TRN	NL	10	36	3	2	0	0	0	0			1	7
shaffor01	1879	1	CHN	NL	73	316	53	96	13	0	0	35			6	28
shoupjo01	1879	1	TRN	NL	11	44	5	4	0	0	0	1			0	3
snydepo01	1879	1	BSN	NL	81	329	42	78	16	3	2	35			5	31
startjo01	1879	1	PRO	NL	66	317	70	101	11	5	2	37			7	4
stedrjo01	1879	1	CHN	NL	4	12	0	1	0	0	0	0			0	3
stockle01	1879	1	CL2	NL	2	6	0	0	0	0	0	0			0	2
striege01	1879	1	CL2	NL	71	264	24	46	7	1	0	15			10	23
sullide01	1879	1	PRO	NL	5	19	5	5	2	0	0	2			1	1
suttoez01	1879	1	BSN	NL	84	339	54	84	13	4	0	34			2	18
tayloli01	1879	1	TRN	NL	24	97	10	21	4	0	0	8			1	8
tyngji01	1879	1	BSN	NL	3	14	2	5	1	0	0	0			0	1
walkeos01	1879	1	BFN	NL	72	287	35	79	15	6	1	35			8	38
wardjo01	1879	1	PRO	NL	83	364	71	104	9	4	2	41			7	14
warnefr01	1879	1	CL2	NL	76	316	32	77	11	4	0	22			2	20
wheelha01	1879	1	CN1	NL	1	3	0	0	0	0	0	0			0	2
whitebi01	1879	1	PRO	NL	1	4	1	1	0	0	0	0			0	1
whitede01	1879	1	CN1	NL	78	333	55	110	16	6	1	52			6	9
whitewi01	1879	1	CN1	NL	76	294	28	40	6	0	0	17			6	56
willine01	1879	1	CHN	NL	80	320	66	94	20	13	1	36			24	31
woodhre01	1879	1	SR1	NL	34	131	4	21	1	0	0	2			0	23
wrighge01	1879	1	PRO	NL	85	388	79	107	15	10	1	42			13	20
yorkto01	1879	1	PRO	NL	81	342	69	106	25	5	1	50			19	28
ahearch01	1880	1	TRN	NL	1	4	1	1	0	0	0	0			0	0
ansonca01	1880	1	CHN	NL	86	356	54	120	24	1	1	74			14	12
bealsto01	1880	1	CHN	NL	13	46	4	7	0	0	0	3			1	6
bennech01	1880	1	WOR	NL	51	193	20	44	9	3	0	18			10	30
berghjo01	1880	1	BSN	NL	11	40	2	8	3	0	0	0			2	5
bondto01	1880	1	BSN	NL	76	282	27	62	4	1	0	24			8	14
bootham01	1880	1	CN1	NL	1	2	0	0	0	0	0	0			0	0
bradlge01	1880	1	PRO	NL	82	309	32	70	7	6	0	23			5	38
briodfa01	1880	1	TRN	NL	1	4	0	0	0	0	0	0			0	0
broutda01	1880	1	TRN	NL	3	12	0	2	0	0	0	1			1	0
burdoja01	1880	1	BSN	NL	86	356	58	90	17	4	2	35			8	26
burnsto01	1880	1	CHN	NL	85	333	47	103	17	3	0	43			12	23
bushodo01	1880	1	WOR	NL	41	146	13	25	3	0	0	19			1	16
carpehi01	1880	1	CN1	NL	77	300	32	72	6	4	0	23			2	15
caskied01	1880	1	TRN	NL	82	333	36	75	5	4	0	28			7	24
cassijo01	1880	1	TRN	NL	83	352	40	89	14	8	0	29			12	34
clappjo01	1880	1	CN1	NL	80	323	33	91	16	4	1	20			21	10
cogswed01	1880	1	TRN	NL	47	209	41	63	7	3	0	13			11	10
connoro01	1880	1	TRN	NL	83	340	53	113	18	8	3	47			13	21
corcola01	1880	1	CHN	NL	72	286	41	66	11	1	0	25			10	33
coreyfr01	1880	1	WOR	NL	41	138	11	24	8	1	0	6			4	27
cranesa01	1880	1	BFN	NL	10	31	4	4	0	0	0	2			1	8
creamge01	1880	1	WOR	NL	85	306	40	61	6	3	0	27			4	21
crowlbi01	1880	1	BFN	NL	85	354	57	95	16	4	0	20			19	23
dalryab01	1880	1	CHN	NL	86	382	91	126	25	12	0	36			3	18
dickebu01	1880	1	TRN	NL	30	119	15	23	2	2	0	10			2	3
dickebu01	1880	2	WOR	NL	31	133	22	39	8	6	0	20			1	2
dignast01	1880	1	BSN	NL	8	34	4	11	1	0	0	4			0	3
dignast01	1880	2	WOR	NL	3	10	1	3	0	1	0	2			0	1
dorgaje01	1880	1	WOR	NL	10	35	2	7	1	0	0	1			0	1
dorgami01	1880	1	PRO	NL	79	321	45	79	10	1	0	31			10	18
driscde01	1880	1	BFN	NL	18	65	1	10	1	0	0	4			1	7
dunlafr01	1880	1	CL2	NL	85	373	61	103	27	9	4	30			7	32
ellicjo01	1880	1	WOR	NL	5	18	1	1	0	0	0	0			1	2
esterdu01	1880	1	BFN	NL	64	253	20	61	12	1	0	35			0	15
evansja01	1880	1	TRN	NL	47	180	31	46	8	1	0	22			7	15
ewingbu01	1880	1	TRN	NL	13	45	1	8	1	0	0	5			1	3
farreja02	1880	1	PRO	NL	80	339	46	92	12	5	3	36			10	6
fergubo01	1880	1	TRN	NL	82	332	55	87	9	0	0	22			24	24
flintsi01	1880	1	CHN	NL	74	284	30	46	10	4	0	17			5	32
foleycu01	1880	1	BSN	NL	80	332	44	97	13	2	2	31			8	14
forceda01	1880	1	BFN	NL	81	290	22	49	10	0	0	17			10	35
fulmech01	1880	1	BFN	NL	11	44	3	7	0	0	0	1			2	4
galvipu01	1880	1	BFN	NL	66	241	25	51	9	2	0	12			5	57
gardngi01	1880	1	CL2	NL	10	32	0	6	1	1	0	4			2	4
geerbi01	1880	1	WOR	NL	2	6	0	0	0	0	0	0			0	0
gillepe01	1880	1	TRN	NL	82	346	50	84	20	5	2	24			17	35
gilliba01	1880	1	CL2	NL	30	99	9	17	4	3	1	13			6	12
glassja01	1880	1	CL2	NL	77	296	37	72	13	3	0	27			2	21
goldsfr01	1880	1	CHN	NL	35	142	24	37	4	2	0	15			2	15
gorege01	1880	1	CHN	NL	77	322	70	116	23	2	2	47			21	10
grossem01	1880	1	PRO	NL	87	347	43	90	18	3	1	34			16	15
guthch01	1880	1	CHN	NL	1	4	0	1	0	0	0	0			1	2
haleyfr01	1880	1	TRN	NL	2	7	0	0	0	0	0	0			1	2
hallal01	1880	1	CL2	NL	3	8	1	1	0	0	0	0			0	0
hankifr01	1880	1	CL2	NL	69	263	32	55	7	4	1	19			1	23
hanlone01	1880	1	CL2	NL	73	280	30	69	10	3	0	32			11	30
harbibi01	1880	1	TRN	NL	9	27	3	10	0	1	0	2			0	3
highadi01	1880	1	TRN	NL	1	5	1	1	0	0	0	0			0	0
hinespa01	1880	1	PRO	NL	85	374	64	115	20	2	3	35			13	17
holbebi01	1880	1	TRN	NL	60	212	18	40	5	1	0	8			9	18
hornujo01	1880	1	BFN	NL	85	342	47	91	8	11	1	42			8	29
hotalpe01	1880	1	CL2	NL	78	325	40	78	17	8	0	41			10	30
houcksa01	1880	1	BSN	NL	12	47	2	7	0	0	0	2			0	6
houcksa01	1880	2	PRO	NL	49	184	27	37	7	7	1	22			3	6
irwinar01	1880	1	WOR	NL	85	352	53	91	19	4	1	35			11	27
jonesch01	1880	1	BSN	NL	66	280	44	84	15	3	5	37			11	27
kearnto01	1880	1	BFN	NL	2	7	0	0	0	0	0	0			0	0
keefeti01	1880	1	TRN	NL	12	43	4	10	3	0	0	3			1	12
keenaji01	1880	1	BFN	NL	2	7	1	1	0	0	0	0			1	1
kellyki01	1880	1	CHN	NL	84	344	72	100	17	9	1	60			12	22
kennedo01	1880	1	CL2	NL	66	250	26	50	10	1	0	18			5	12
knighlo01	1880	1	WOR	NL	49	201	31	48	11	3	0	21			5	8
larkite01	1880	1	TRN	NL	6	20	1	3	1	0	0	1			3	4
lathaar01	1880	1	BFN	NL	22	79	9	10	3	1	0	3			1	8
lawlomi01	1880	1	TRN	NL	4	9	1	1	0	0	0	0			1	1
learyja01	1880	1	BSN	NL	1	3	1	0	0	0	0	0			1	0
leonaan01	1880	1	CN1	NL	33	133	15	28	3	0	1	17			8	11
mackde01	1880	1	BFN	NL	17	59	5	12	0	0	0	3			5	7
mannija01	1880	1	CN1	NL	48	190	20	41	6	3	2	17			7	15
mansemi01	1880	1	CN1	NL	53	187	22	36	6	2	2	12			4	37
mccorji01	1880	1	CL2	NL	78	289	34	71	11	0	0	26			5	5
mcgeami01	1880	1	PRO	NL	18	59	5	8	0	0	0	1			0	6
mcgeami01	1880	2	CL2	NL	31	111	14	28	2	1	0	6			4	3
mcgunbi01	1880	1	BFN	NL	7	22	0	4	0	0	0	1			0	4
mcgunbi01	1880	2	WOR	NL	1	4	0	0	0	0	0	0			0	2
morrijo01	1880	1	BSN	NL	86	342	51	81	16	8	2	44			11	37
mountfr01	1880	1	TRN	NL	2	9	1	2	0	0	0	0			0	4
moynami01	1880	1	BFN	NL	27	100	12	33	5	1	0	14			6	9
nichotr01	1880	1	WOR	NL	2	7	0	0	0	0	0	0			0	0
olearda01	1880	1	BSN	NL	3	12	1	3	2	0	0	1			0	3
orourji01	1880	1	BSN	NL	86	363	71	100	20	11	6	45			21	8
orourjo01	1880	1	BSN	NL	81	313	30	86	22	8	3	36			18	32
peterjo01	1880	1	PRO	NL	86	359	30	82	5	0	0	24			5	15
phillbi01	1880	1	CL2	NL	85	334	41	85	14	10	1	36			6	29
poormto01	1880	1	BFN	NL	19	70	5	11	1	0	0	1			0	13
poormto01	1880	2	CHN	NL	7	25	3	5	1	2	0	0			0	2
powerph01	1880	1	BSN	NL	37	126	11	18	5	0	0	10			5	15
purcebl01	1880	1	CN1	NL	77	325	48	95	13	6	1	24			5	13
questjo01	1880	1	CHN	NL	82	300	37	71	12	1	0	27			8	16
radboch01	1880	1	BFN	NL	6	21	1	3	0	0	0	1			0	1
reillch01	1880	1	CN1	NL	30	103	8	21	1	0	0	9			0	5
reilljo01	1880	1	CN1	NL	73	272	21	56	8	4	0	16			3	36
richaha01	1880	1	BFN	NL	83	343	48	89	18	8	0	17			14	37
richmjo01	1880	1	BSN	NL	32	129	12	32	3	1	0	9			2	18
richmle01	1880	1	WOR	NL	77	309	44	70	8	4	0	34			9	32
roweja01	1880	1	BFN	NL	79	326	43	82	10	6	1	36			6	17
saylo01	1880	1	CN1	NL	48	191	14	38	8	1	0	15			4	31
shaffor01	1880	1	CL2	NL	83	338	62	90	14	9	0	21			17	36
smithpo01	1880	1	CN1	NL	83	334	35	69	10	9	0	27			6	36
sommejo01	1880	1	CN1	NL	24	88	10	16	1	0	0	6			0	2
startjo01	1880	1	PRO	NL	82	345	53	96	14	6	0	27			13	20
stearec01	1880	1	BFN	NL	28	104	8	19	6	1	0	13			3	23
stoveha01	1880	1	WOR	NL	83	355	76	94	21	14	6	28			12	46
straujo01	1880	1	TRN	NL	3	12	1	3	0	0	0	3			1	3
sullich01	1880	1	WOR	NL	43	166	22	43	6	3	0	0			4	6
sullide01	1880	1	BSN	NL	1	4	1	1	0	0	0	1			0	1
suttoez01	1880	1	BSN	NL	76	288	41	72	9	2	0	25			7	7
tobinbi01	1880	1	WOR	NL	5	16	1	2	0	0	0	3			0	5
tobinbi01	1880	2	TRN	NL	33	136	14	22	1	1	0	8			4	20
trottsa01	1880	1	BSN	NL	39	125	14	26	4	1	0	9			3	5
walkeos01	1880	1	BFN	NL	34	126	12	29	4	2	1	15			6	18
wardjo01	1880	1	PRO	NL	86	356	53	81	12	2	0	27			6	16
welchmi01	1880	1	TRN	NL	66	251	25	72	20	3	0	27			5	24
wheelha01	1880	1	CL2	NL	1	4	0	1	0	0	0	0			0	0
wheelha01	1880	2	CN1	NL	17	65	1	6	2	0	0	2			0	15
whitede01	1880	1	CN1	NL	35	141	21	42	4	2	0	7			9	7
whitewi01	1880	1	CN1	NL	62	207	16	35	7	1	0	14			6	29
whitnar01	1880	1	WOR	NL	76	302	38	67	13	5	1	36			9	15
wiedmst01	1880	1	BFN	NL	23	78	8	8	1	0	0	3			2	11
willine01	1880	1	CHN	NL	75	311	65	78	20	2	0	31			15	26
woodge01	1880	1	WOR	NL	81	327	37	80	16	5	0	28			10	37
wrighge01	1880	1	BSN	NL	1	4	2	1	0	0	0	0			0	0
wrighsa01	1880	1	CN1	NL	9	34	0	3	0	0	0	0			0	5
yorkto01	1880	1	PRO	NL	53	203	21	43	9	2	0	18			8	29
ansonca01	1881	1	CHN	NL	84	343	67	137	21	7	1	82			26	4
barnero01	1881	1	BSN	NL	69	295	42	80	14	1	0	17			16	16
bennech01	1881	1	DTN	NL	76	299	44	90	18	7	7	64			18	37
bondto01	1881	1	BSN	NL	3	10	0	2	0	0	0	0			0	0
bradlge01	1881	1	DTN	NL	1	4	0	0	0	0	0	0			0	0
bradlge01	1881	2	CL2	NL	60	241	21	60	10	1	2	18			4	25
broutda01	1881	1	BFN	NL	65	270	60	86	18	9	8	45			18	22
brownle01	1881	1	DTN	NL	27	108	16	26	3	1	3	14			3	16
brownle01	1881	2	PRO	NL	18	75	9	18	3	1	0	10			4	13
burdoja01	1881	1	BSN	NL	73	282	36	67	12	4	1	24			7	18
burnsto01	1881	1	CHN	NL	84	342	41	95	20	3	4	42			14	22
bushodo01	1881	1	WOR	NL	76	275	35	64	7	4	0	21			21	23
carpehi01	1881	1	WOR	NL	83	347	40	75	12	2	2	31			3	19
caskied01	1881	1	TRN	NL	63	234	33	53	7	1	0	21			13	29
cassijo01	1881	1	TRN	NL	85	370	57	82	13	3	1	11			18	21
clappjo01	1881	1	CL2	NL	68	261	47	66	12	2	0	25			35	6
connoro01	1881	1	TRN	NL	85	367	55	107	17	6	2	31			15	20
corcola01	1881	1	CHN	NL	47	189	25	42	8	0	0	9			5	22
coreyfr01	1881	1	WOR	NL	51	203	22	45	8	4	0	10			5	10
creamge01	1881	1	WOR	NL	80	309	42	64	9	2	0	25			11	27
crowlbi01	1881	1	BSN	NL	72	279	33	71	12	0	0	31			14	15
dalryab01	1881	1	CHN	NL	82	362	72	117	22	4	1	37			15	22
deaslpa01	1881	1	BSN	NL	43	147	13	35	5	2	0	8			5	10
dennyje01	1881	1	PRO	NL	85	320	38	77	16	2	1	24			5	44
derbyge01	1881	1	DTN	NL	59	236	17	44	3	1	0	12			4	29
dickebu01	1881	1	WOR	NL	80	367	48	116	18	6	1	31			8	8
dorgami01	1881	1	WOR	NL	51	220	36	61	5	0	0	18			8	4
dorgami01	1881	2	DTN	NL	8	34	5	8	1	0	0	5			1	0
doschhe01	1881	1	CL2	NL	5	19	2	4	0	0	0	0			0	2
dunlafr01	1881	1	CL2	NL	80	351	60	114	25	4	3	24			18	24
evansja01	1881	1	TRN	NL	83	315	35	76	11	5	0	28			14	30
ewingbu01	1881	1	TRN	NL	67	272	40	68	14	7	0	25			7	8
farreja02	1881	1	PRO	NL	84	345	69	82	16	5	5	36			29	23
fergubo01	1881	1	TRN	NL	85	339	56	96	13	5	1	35			29	12
flahema01	1881	1	WOR	NL	1	2	0	0	0	0	0	0			0	2
flintsi01	1881	1	CHN	NL	80	306	46	95	18	0	1	34			6	39
foleycu01	1881	1	BFN	NL	83	375	58	96	20	2	1	25			7	27
foleywi01	1881	1	DTN	NL	5	15	0	2	0	0	0	1			2	3
forceda01	1881	1	BFN	NL	75	278	21	50	9	1	0	15			11	29
foxjo01	1881	1	BSN	NL	30	118	8	21	0	0	0	4			0	11
galvipu01	1881	1	BFN	NL	62	236	19	50	12	4	0	21			3	70
gerhajo01	1881	1	DTN	NL	80	297	35	72	13	6	0	36			7	31
gillepe01	1881	1	TRN	NL	84	348	43	96	14	3	0	41			9	24
gilliba01	1881	1	PRO	NL	46	183	19	40	7	2	0	20			9	24
glassja01	1881	1	CL2	NL	85	335	49	86	9	5	0	33			15	8
goldsfr01	1881	1	CHN	NL	42	158	24	38	3	4	0	16			6	17
gorege01	1881	1	CHN	NL	73	309	86	92	18	9	1	44			27	23
grossem01	1881	1	PRO	NL	51	182	15	50	9	4	1	24			13	11
hankifr01	1881	1	TRN	NL	85	321	34	62	15	0	1	19			10	41
hanlone01	1881	1	DTN	NL	76	305	63	85	14	8	2	28			22	11
hinespa01	1881	1	PRO	NL	80	361	65	103	27	5	2	31			13	12
holbebi01	1881	1	TRN	NL	46	180	16	49	3	0	0	14			3	13
hornujo01	1881	1	BSN	NL	83	324	40	78	12	8	2	25			5	25
hotalpe01	1881	1	WOR	NL	77	317	51	98	15	3	1	35			18	12
houcksa01	1881	1	DTN	NL	75	308	43	86	16	6	1	36			6	6
irwinar01	1881	1	WOR	NL	50	206	27	55	8	2	0	24			7	4
keefeti01	1881	1	TRN	NL	46	152	18	35	7	1	0	19			21	26
kellyki01	1881	1	CHN	NL	82	353	84	114	27	3	2	55			16	14
kemmlru01	1881	1	CL2	NL	1	3	0	0	0	0	0	0			0	1
kennedo01	1881	1	CL2	NL	39	150	19	47	7	1	0	15			5	13
knighlo01	1881	1	DTN	NL	83	340	67	92	16	3	1	52			23	21
learyja01	1881	1	DTN	NL	3	11	2	3	1	1	0	4			1	1
lewisfr01	1881	1	BSN	NL	27	114	17	25	6	0	0	9			7	5
lynchja01	1881	1	BFN	NL	23	78	6	13	3	0	0	3			4	8
mannija01	1881	1	BFN	NL	1	1	0	0	0	0	0	0			0	0
mathebo01	1881	1	PRO	NL	16	57	6	11	1	0	0	4			5	6
mathebo01	1881	2	BSN	NL	19	71	2	12	2	0	0	4			0	5
mcclebi01	1881	1	PRO	NL	68	259	30	43	3	1	0	16			15	21
mccorha01	1881	1	WOR	NL	12	45	1	6	0	0	0	3			5	6
mccorji01	1881	1	CL2	NL	70	309	45	79	9	4	0	26			5	16
mcgeami01	1881	1	CL2	NL	11	41	1	9	0	0	0	5			0	6
morrijo01	1881	1	BSN	NL	81	311	47	90	19	3	1	39			12	30
morrijo02	1881	1	BFN	NL	12	47	3	10	2	0	0	3			0	3
mountfr01	1881	1	DTN	NL	7	25	0	4	1	1	0	4			2	8
moynami01	1881	1	CL2	NL	33	135	12	31	5	1	0	8			3	14
moynami01	1881	2	DTN	NL	1	4	1	1	0	0	0	0			0	1
mullato01	1881	1	DTN	NL	5	19	0	5	0	0	0	1			0	0
myershe01	1881	1	PRO	NL	1	4	0	0	0	0	0	0			0	2
nelsoca01	1881	1	WOR	NL	24	103	13	29	1	0	1	15			5	6
nicolhu01	1881	1	CHN	NL	26	108	13	22	2	0	0	7			4	12
nolanth01	1881	1	CL2	NL	41	168	12	41	5	1	0	18			4	13
olearda01	1881	1	DTN	NL	2	8	0	0	0	0	0	0			0	2
orourji01	1881	1	BFN	NL	83	348	71	105	21	7	0	30			27	18
peterjo01	1881	1	BFN	NL	54	229	21	49	8	1	0	25			3	12
phillbi01	1881	1	CL2	NL	85	357	51	97	18	10	1	44			5	19
piercan01	1881	1	CHN	NL	2	8	1	2	0	0	0	0			0	1
pikeli01	1881	1	WOR	NL	5	18	1	2	0	0	0	0			4	3
powelma01	1881	1	DTN	NL	55	219	47	74	9	4	1	38			15	9
powerph01	1881	1	CL2	NL	5	15	1	1	0	0	0	0			1	2
purcebl01	1881	1	CL2	NL	20	80	3	14	2	1	0	4			5	8
purcebl01	1881	2	BFN	NL	30	113	15	33	7	2	0	17			8	8
questjo01	1881	1	CHN	NL	78	293	35	72	6	0	1	26			2	29
quinnjo01	1881	1	BSN	NL	1	4	0	0	0	0	0	0			0	0
quinnjo01	1881	2	WOR	NL	2	7	0	1	0	0	0	1			1	2
radboch01	1881	1	PRO	NL	72	270	27	59	9	0	0	28			10	15
reillch01	1881	1	DTN	NL	19	70	8	12	2	0	0	3			0	10
reillch01	1881	2	WOR	NL	2	8	2	3	0	0	0	1			0	1
remseja01	1881	1	CL2	NL	48	172	14	30	4	3	0	13			9	31
richaha01	1881	1	BFN	NL	83	344	62	100	18	9	2	53			12	27
richmjo01	1881	1	BSN	NL	27	98	13	27	2	2	1	12			6	7
richmle01	1881	1	WOR	NL	61	252	31	63	5	1	0	28			10	10
roweja01	1881	1	BFN	NL	64	246	30	82	11	11	1	43			1	12
shaffor01	1881	1	CL2	NL	85	343	48	88	13	6	1	34			23	20
smithpo01	1881	1	CL2	NL	10	34	1	4	0	0	0	3			0	8
smithpo01	1881	2	BFN	NL	3	11	3	0	0	0	0	1			3	5
smithpo01	1881	3	WOR	NL	11	41	1	3	0	0	0	2			3	5
snydepo01	1881	1	BSN	NL	62	219	14	50	8	0	0	16			3	23
startjo01	1881	1	PRO	NL	79	348	56	114	12	6	0	29			9	7
stearec01	1881	1	DTN	NL	3	11	1	1	1	0	0	0			0	2
stoveha01	1881	1	WOR	NL	75	341	57	92	25	7	2	30			12	23
stratas01	1881	1	WOR	NL	1	4	0	1	0	0	0	0			0	2
sullisl01	1881	1	BFN	NL	35	121	13	23	4	0	0	15			1	21
suttoez01	1881	1	BSN	NL	83	333	43	97	12	4	0	31			13	9
swarted01	1881	1	BFN	NL	1	3	0	1	0	0	0	0			1	0
taylobi01	1881	1	WOR	NL	6	28	3	3	1	0	0	2			0	2
taylobi01	1881	2	DTN	NL	1	4	0	2	2	0	0	1			0	0
taylobi01	1881	3	CL2	NL	24	103	6	25	1	0	0	12			0	8
trottsa01	1881	1	DTN	NL	6	25	3	5	2	1	0	2			1	3
troyda01	1881	1	DTN	NL	11	44	2	15	3	0	0	4			3	8
wardjo01	1881	1	PRO	NL	85	357	56	87	18	6	0	53			5	10
welchmi01	1881	1	TRN	NL	40	148	12	30	10	0	0	11			1	16
whitede01	1881	1	BFN	NL	78	319	58	99	24	4	0	53			9	8
whitewi01	1881	1	DTN	NL	2	7	0	0	0	0	0	0			0	1
whitnar01	1881	1	DTN	NL	58	214	23	39	7	5	0	9			7	15
whitnji01	1881	1	BSN	NL	75	282	37	72	17	3	0	32			19	18
wiedmst01	1881	1	DTN	NL	13	47	8	12	1	0	0	5			2	2
willine01	1881	1	CHN	NL	82	343	56	92	12	6	1	48			19	19
wisesa01	1881	1	DTN	NL	1	4	0	2	0	0	0	0			0	2
woodge01	1881	1	DTN	NL	80	337	54	100	18	9	2	32			19	32
wrighge01	1881	1	BSN	NL	7	25	4	5	0	0	0	0			3	1
wrighsa01	1881	1	BSN	NL	1	4	0	1	0	0	0	0			0	0
yorkto01	1881	1	PRO	NL	85	316	57	96	23	5	2	47			29	26
ansonca01	1882	1	CHN	NL	82	348	69	126	29	8	1	83			20	7
arundha01	1882	1	PT1	AA	14	53	8	10	0	0	0		0		5
arundtu01	1882	1	PH4	AA	1	5	0	0	0	0	0		0		0
battijo01	1882	1	PT1	AA	34	133	13	28	5	1	1		0		3
bennech01	1882	1	DTN	NL	84	342	43	103	16	10	5	51			20	33
birchju01	1882	1	PH4	AA	75	338	65	89	12	1	0	27	0		8
blakibo01	1882	1	PH4	AA	72	281	40	64	4	1	0	20	0		9
bohnch01	1882	1	LS2	AA	4	13	0	2	0	0	0		0		0
bondto01	1882	1	WOR	NL	8	30	1	4	0	0	0	2			2	3
bootham01	1882	1	BL2	AA	1	3	0	0	0	0	0		0		0
bootham01	1882	2	LS2	AA	1	4	0	0	0	0	0		0		0
bradlge01	1882	1	CL2	NL	30	115	16	21	5	0	0	6			4	16
briodfa01	1882	1	CL2	NL	53	194	30	50	13	0	0	13			9	13
broutda01	1882	1	BFN	NL	84	351	71	129	23	11	6	63			21	7
browned01	1882	1	SL4	AA	17	60	4	11	0	0	0		0		4
brownpe01	1882	1	LS2	AA	69	288	67	109	17	3	5		0		26
brownto01	1882	1	BL2	AA	45	181	30	55	5	2	1	23	0		6
buffich01	1882	1	BSN	NL	15	50	5	13	1	0	0	4			2	3
burdoja01	1882	1	BSN	NL	83	319	36	76	6	7	0	27			9	24
burkeja01	1882	1	BFN	NL	1	4	0	0	0	0	0	0			0	1
burnsto01	1882	1	CHN	NL	84	355	55	88	23	6	0	48			15	28
burtfr01	1882	1	BL2	AA	10	36	2	4	2	1	0		0		1
bushodo01	1882	1	WOR	NL	69	253	20	40	4	1	1	15			5	17
carpehi01	1882	1	CN2	AA	80	351	78	120	15	5	1	67	0		10
carrocl01	1882	1	PRO	NL	10	41	4	5	0	0	0	2			0	4
caseybo01	1882	1	DTN	NL	9	39	5	9	2	1	1	7			0	15
cassijo01	1882	1	TRN	NL	29	121	14	21	3	1	0	9			3	16
clarkjo01	1882	1	WOR	NL	3	11	0	4	2	0	0	2			0	3
clinemo01	1882	1	BL2	AA	44	172	18	38	6	2	0		0		3
clintji01	1882	1	WOR	NL	26	98	9	16	2	0	0	3			7	13
cogswed01	1882	1	WOR	NL	13	51	10	7	1	0	0	1			6	6
comisch01	1882	1	SL4	AA	78	329	58	80	9	5	1	45	0		4
connoro01	1882	1	TRN	NL	81	349	65	115	22	18	4	42			13	20
corcola01	1882	1	CHN	NL	40	169	23	35	10	2	1	24			6	18
coreyfr01	1882	1	WOR	NL	64	255	33	63	7	12	0	29			5	31
creamge01	1882	1	WOR	NL	81	286	27	65	16	6	1	29			14	24
critcmo01	1882	1	PT1	AA	1	5	0	0	0	0	0		0		0
critcmo01	1882	2	SL4	AA	4	14	0	3	0	0	0		0		0
crottjo01	1882	1	LS2	AA	5	20	1	2	0	0	0		0		0
crottjo01	1882	2	SL4	AA	8	28	2	4	1	0	0		0		3
cuthbne01	1882	1	SL4	AA	60	233	28	52	16	5	0		0		17
dailyhu01	1882	1	BFN	NL	29	110	10	18	6	1	0	9			2	28
dalryab01	1882	1	CHN	NL	84	397	96	117	25	11	1	36			14	18
deaslpa01	1882	1	BSN	NL	67	264	36	70	8	0	0	29			7	22
deckefr01	1882	1	SL4	AA	2	8	0	2	0	0	0	1	0		0
dennyje01	1882	1	PRO	NL	84	329	54	81	10	9	2	42			4	46
derbyge01	1882	1	DTN	NL	40	149	13	29	2	1	0	8			7	23
dolanto01	1882	1	BFN	NL	22	89	12	14	0	1	0	8			2	11
dorgaje01	1882	1	PH4	AA	44	181	25	51	9	1	0	24	0		4
dorrbe01	1882	1	SL4	AA	8	26	2	4	0	0	0		0		0
doschhe01	1882	1	CL2	NL	25	104	7	25	2	0	0	10			0	11
doylejo02	1882	1	SL4	AA	3	11	0	2	0	0	0		0		0
driscde01	1882	1	PT1	AA	23	80	12	11	2	0	1		0		3
dunlafr01	1882	1	CL2	NL	84	364	68	102	19	4	0	28			23	26
dwyerjo01	1882	1	CL2	NL	1	3	0	0	0	0	0	1			0	0
dylerjo01	1882	1	LS2	AA	1	4	0	0	0	0	0		0		0
eastha01	1882	1	BL2	AA	1	4	0	0	0	0	0		0		0
eganji01	1882	1	TRN	NL	30	115	15	23	3	2	0	10			1	21
esterdu01	1882	1	CL2	NL	45	179	13	44	4	3	0	19			5	12
evansja01	1882	1	WOR	NL	80	334	33	71	10	4	0	25			7	22
eversto01	1882	1	BL2	AA	1	4	0	0	0	0	0		0		0
ewingbu01	1882	1	TRN	NL	74	328	67	89	16	11	2	29			10	15
farrebi01	1882	1	PH4	AA	2	7	2	2	1	0	0	1	0		1
farreja02	1882	1	PRO	NL	84	366	67	93	21	6	2	31			16	23
farrejo01	1882	1	DTN	NL	69	283	34	70	12	2	1	24			4	20
fergubo01	1882	1	TRN	NL	81	319	44	82	15	2	0	32			23	21
flintsi01	1882	1	CHN	NL	81	331	48	83	18	8	4	44			2	50
foleycu01	1882	1	BFN	NL	84	341	51	104	16	4	3	49			12	26
forceda01	1882	1	BFN	NL	73	278	39	67	10	1	1	28			12	17
forstto01	1882	1	DTN	NL	21	76	5	7	0	0	0	2			5	12
fulmech01	1882	1	CN2	AA	79	324	54	91	13	4	0	27	0		10
fusseed01	1882	1	SL4	AA	35	136	13	31	2	0	0		0		5
galvipu01	1882	1	BFN	NL	54	206	21	44	7	4	0	17			2	49
geisbi01	1882	1	BL2	AA	13	41	2	6	0	1	0	2	0		1
gillepe01	1882	1	TRN	NL	74	298	46	82	5	4	2	33			9	14
gilliba01	1882	1	PRO	NL	56	201	32	45	7	6	0	26			4	26
glassja01	1882	1	CL2	NL	84	358	66	104	27	9	4	46			13	9
gleasbi01	1882	1	SL4	AA	79	347	63	100	11	6	1		0		6
gleasja01	1882	1	SL4	AA	78	331	53	84	10	1	2		0		27
goldsfr01	1882	1	CHN	NL	45	183	23	42	11	1	0	19			4	29
goodmja01	1882	1	PT1	AA	10	41	5	13	2	2	0		0		2
gorege01	1882	1	CHN	NL	84	367	99	117	15	7	3	51			29	19
greenbi01	1882	1	PH4	AA	7	30	8	9	1	0	0	1	0		1
halbred01	1882	1	PH4	AA	1	4	0	0	0	0	0		0		0
halpiji01	1882	1	WOR	NL	2	8	0	0	0	0	0	0			0	2
hanlone01	1882	1	DTN	NL	82	347	68	80	18	6	5	38			26	25
harbibi01	1882	1	TRN	NL	32	123	11	23	1	1	0	13			10	17
hayesja01	1882	1	WOR	NL	78	326	27	88	22	4	4	54			6	26
heckegu01	1882	1	LS2	AA	78	340	62	94	14	4	3		0		5
hinespa01	1882	1	PRO	NL	84	379	73	117	28	10	4	34			10	14
hoganed01	1882	1	SL4	AA	1	3	1	1	0	0	0		0		0
holbebi01	1882	1	TRN	NL	71	251	24	46	5	0	0	23			11	22
holdsji01	1882	1	TRN	NL	1	3	0	0	0	0	0	0			0	1
hornujo01	1882	1	BSN	NL	85	388	67	117	14	11	1	50			2	25
hotalpe01	1882	1	BSN	NL	84	378	64	98	16	5	0	28			16	21
housech02	1882	1	BL2	AA	74	307	42	78	10	7	1		0		4
irwinar01	1882	1	WOR	NL	84	333	30	73	12	4	0	30			14	34
irwinjo01	1882	1	WOR	NL	1	4	0	0	0	0	0	0			0	2
jacobha01	1882	1	BL2	AA	31	121	17	21	1	1	1		0		7
jonesbi01	1882	1	BL2	AA	4	15	1	1	0	0	0		0		0
kearnto01	1882	1	DTN	NL	4	13	2	4	2	0	0	1			0	4
keefeti01	1882	1	TRN	NL	53	189	24	43	8	7	1	19			17	46
keenaji01	1882	1	PT1	AA	25	96	10	21	7	0	1		0		1
kellyjo01	1882	1	CL2	NL	30	104	6	14	2	0	0	5			1	24
kellyki01	1882	1	CHN	NL	84	377	81	115	37	4	1	55			10	27
kemmlru01	1882	1	CN2	AA	3	11	0	1	1	0	0		0		0
kemmlru01	1882	2	PT1	AA	24	99	7	25	4	0	0		0		1
kennedo01	1882	1	CL2	NL	1	3	0	1	0	0	0	0			1	0
kienzbi01	1882	1	PH4	AA	9	33	8	11	3	2	0	9	0		5
kinziwa01	1882	1	DTN	NL	13	53	5	5	0	1	0	2			0	8
knighlo01	1882	1	DTN	NL	86	347	39	72	12	6	0	24			16	21
landido01	1882	1	PH4	AA	3	12	1	2	0	0	0		0		0
landido01	1882	2	BL2	AA	50	175	9	29	1	0	0		0		3
lanech01	1882	1	PT1	AA	57	214	26	38	8	2	3		0		5
lathaju01	1882	1	PH4	AA	74	323	47	92	10	2	0	38	0		10
learyja01	1882	1	PT1	AA	60	257	32	75	7	3	1		0		5
learyja01	1882	2	BL2	AA	4	18	3	4	1	0	0		0		0
luffhe01	1882	1	DTN	NL	3	11	1	3	2	0	0	1			0	0
luffhe01	1882	2	CN2	AA	28	120	16	28	2	2	0	6	0		2
mackde01	1882	1	LS2	AA	72	264	41	48	3	1	0		0		16
maculji01	1882	1	CN2	AA	79	299	44	70	6	6	0	22	0		14
mannfr01	1882	1	WOR	NL	19	77	12	18	5	0	0	7			2	15
mannfr01	1882	2	PH4	AA	29	121	13	28	7	4	0		0		4
manniti01	1882	1	PRO	NL	21	76	7	8	0	0	0	8			5	13
mansejo01	1882	1	PH4	AA	31	126	17	30	3	1	0	17	0		4
mansemi01	1882	1	PT1	AA	79	347	59	96	18	16	2		0		7
maskrha01	1882	1	LS2	AA	1	4	0	0	0	0	0		0		0
maskrle01	1882	1	LS2	AA	76	288	30	65	14	2	0		0		9
mathebo01	1882	1	BSN	NL	45	169	17	38	6	0	0	13			8	18
mccafha01	1882	1	SL4	AA	38	153	23	42	8	6	0		0		3
mccafha01	1882	2	LS2	AA	1	4	1	1	0	0	0		0		0
mccluha01	1882	1	BSN	NL	2	6	1	2	0	0	0	0			0	1
mccorha01	1882	1	CN2	AA	26	93	3	12	0	1	0	3	0		1
mccorji01	1882	1	CL2	NL	70	262	35	57	7	3	2	15			2	22
mcgeami01	1882	1	DTN	NL	34	133	14	19	4	1	0	2			2	20
mcginju01	1882	1	SL4	AA	51	203	17	44	6	4	0		0		3
mcgunbi01	1882	1	CL2	NL	1	5	2	1	0	0	0	0			0	1
mckelru01	1882	1	PT1	AA	1	4	0	0	0	0	0		0		0
mclaufr01	1882	1	WOR	NL	15	55	7	12	0	2	1	4			0	11
mcphebi01	1882	1	CN2	AA	78	311	43	71	8	7	1	31	0		11
merried01	1882	1	LS2	AA	1	0	0	0	0	0	0		0		0
merried01	1882	2	WOR	NL	2	8	0	1	0	0	0	4			0	1
mitchbo01	1882	1	SL4	AA	1	4	0	0	0	0	0		0		0
morgabi02	1882	1	PT1	AA	17	66	10	17	2	1	0		0		4
morrijo01	1882	1	BSN	NL	83	349	73	101	19	11	2	54			18	29
morrito01	1882	1	DTN	NL	2	7	1	2	0	0	0	0			0	2
mortoch01	1882	1	PT1	AA	25	103	12	29	0	3	0		0		5
mortoch01	1882	2	SL4	AA	9	32	2	2	0	1	0		0		2
mountfr01	1882	1	WOR	NL	5	16	1	1	0	0	0	1	0	0	0	5	0	0	0
mountfr01	1882	2	PH4	AA	9	36	5	12	3	0	0		0		2
mountfr01	1882	3	WOR	NL	20	70	8	19	2	2	2	5			3	18
muldomi01	1882	1	CL2	NL	84	341	50	84	17	5	6	45			10	28
mullato01	1882	1	LS2	AA	77	303	46	78	13	1	0		0		13
myershe01	1882	1	BL2	AA	69	294	43	53	3	0	0		0		12
navasa01	1882	1	PRO	NL	28	97	15	20	2	0	0	7			1	13
nichotr01	1882	1	BL2	AA	26	95	4	15	1	0	0		0		7
nicolhu01	1882	1	CHN	NL	47	186	19	37	9	1	1	16			7	29
obrieja01	1882	1	PH4	AA	62	241	44	73	13	3	3	37	0		13
obrieto01	1882	1	WOR	NL	22	89	9	18	1	1	0	7			1	10
olearda01	1882	1	WOR	NL	6	22	2	4	1	0	0	2			5	5
orourji01	1882	1	BFN	NL	84	370	62	104	15	6	2	37			13	13
peterjo01	1882	1	PT1	AA	78	333	46	96	10	1	0		0		4
pfefffr01	1882	1	TRN	NL	85	330	26	72	7	4	1	43			1	24
phillbi01	1882	1	CL2	NL	78	335	40	87	17	7	4	47			7	18
piercgr01	1882	1	LS2	AA	9	33	3	10	1	0	0		0		1
piercgr01	1882	2	BL2	AA	41	151	8	30	2	1	0		0		3
powelma01	1882	1	DTN	NL	80	338	44	81	13	0	0	29			19	27
powerph01	1882	1	CN2	AA	16	60	4	13	1	1	0	5	0		3
purcebl01	1882	1	BFN	NL	84	380	79	105	18	6	2	40			14	27
questjo01	1882	1	CHN	NL	42	159	24	32	5	2	0	15			8	16
radboch01	1882	1	PRO	NL	83	326	30	78	11	0	1	32			12	22
reccijo01	1882	1	LS2	AA	74	266	46	63	12	3	1		0		23
recciph01	1882	1	LS2	AA	4	15	0	2	0	0	0		0		0
reillch01	1882	1	PRO	NL	3	11	0	2	0	0	0	2			1	2
reynoch01	1882	1	PH4	AA	2	8	1	1	0	0	0		0		0
richaha01	1882	1	BFN	NL	83	354	61	96	20	8	2	57			11	33
richmjo01	1882	1	CL2	NL	41	140	12	24	6	2	0	11			11	27
richmjo01	1882	2	PH4	AA	18	65	8	12	2	2	0	4	0		11
richmle01	1882	1	WOR	NL	55	228	50	64	8	9	2	28			9	11
robinya01	1882	1	DTN	NL	11	39	1	7	1	0	0	2			1	13
rosemch01	1882	1	TRN	NL	82	331	41	78	21	6	1	29			3	41
roweda01	1882	1	CL2	NL	24	97	13	25	4	3	1	17			4	9
roweja01	1882	1	BFN	NL	75	308	43	82	14	5	1	42			12	0
rowened01	1882	1	BSN	NL	83	327	36	81	7	4	1	43			19	18
russjo01	1882	1	BL2	AA	1	3	0	1	0	0	0		0		0
salisha01	1882	1	PT1	AA	39	145	17	22	2	0	0		0		4
sayji01	1882	1	PH4	AA	22	82	12	17	2	0	1		0		1
sayji01	1882	2	LS2	AA	1	4	1	1	0	0	0		0		0
saylo01	1882	1	PH4	AA	49	199	35	45	4	3	1	28	0		8
schapjo01	1882	1	SL4	AA	15	50	7	9	1	0	0		0		7
scharni01	1882	1	BL2	AA	10	39	4	8	1	1	1		0		0
schenbi01	1882	1	LS2	AA	60	231	37	60	11	3	0		0		8
scottmi01	1882	1	CHN	NL	1	5	1	2	0	0	0	0			0	0
sewarge01	1882	1	SL4	AA	38	144	23	31	1	1	0		0		12
seymoja01	1882	1	PT1	AA	1	4	0	0	0	0	0		0		0
shaffor01	1882	1	CL2	NL	84	313	37	67	14	2	3	28			27	27
shetzjo01	1882	1	BL2	AA	73	282	23	62	8	3	0		0		5
shoupjo01	1882	1	SL4	AA	2	7	1	0	0	0	0		0		0
smilebi01	1882	1	SL4	AA	59	240	30	51	4	2	0		0		6
smilebi01	1882	2	BL2	AA	16	61	3	9	0	0	0		0		0
smithjo02	1882	1	TRN	NL	35	149	27	36	4	3	0	14			3	24
smithjo02	1882	2	WOR	NL	19	70	10	17	3	2	0	5			5	10
smithl01	1882	1	BL2	AA	1	3	0	0	0	0	0		0		0
smithpo01	1882	1	PH4	AA	20	65	10	6	0	0	0	2	0		12
smithpo01	1882	2	LS2	AA	3	11	1	2	0	0	0		0		0
snydege01	1882	1	PH4	AA	1	3	2	1	0	0	0		0		0
snydepo01	1882	1	CN2	AA	72	309	49	90	12	2	1	50	0		9
sommejo01	1882	1	CN2	AA	80	354	82	102	12	6	1	29	0		24
startjo01	1882	1	PRO	NL	82	356	58	117	8	10	0	48			11	7
stearec01	1882	1	CN2	AA	49	214	28	55	10	2	0	35	0		6
stoveha01	1882	1	WOR	NL	84	360	90	104	13	10	5	26			22	34
straujo01	1882	1	PH4	AA	8	32	2	6	2	0	0	1	0		1
striccu01	1882	1	PH4	AA	72	272	34	59	6	1	0	18	0		15
stricjo01	1882	1	LS2	AA	32	110	17	18	6	1	0		0		9
striege01	1882	1	PT1	AA	79	297	45	58	9	6	2		0		13
sullida01	1882	1	LS2	AA	67	286	44	78	8	2	0		0		9
sullisl01	1882	1	SL4	AA	51	188	24	34	3	3	0		0		3
suttoez01	1882	1	BSN	NL	81	319	44	80	8	1	2	38			24	25
swarted01	1882	1	PT1	AA	76	325	86	107	18	11	4		0		21
sweenbi01	1882	1	PH4	AA	23	88	8	14	4	0	0	6	0		4
sweench01	1882	1	PRO	NL	1	4	0	0	0	0	0	0			0	1
taylobi01	1882	1	PT1	AA	70	299	40	84	16	13	3		0		7
thomptu01	1882	1	CN2	AA	1	5	0	1	0	0	0		0		0
tiernbi01	1882	1	CN2	AA	1	5	1	0	0	0	0		0		0
tillejo01	1882	1	CL2	NL	15	56	2	5	1	1	0	4			2	11
trottsa01	1882	1	DTN	NL	32	129	11	31	7	1	0	12			0	13
troyda01	1882	1	DTN	NL	40	152	22	37	7	2	0	14			5	10
troyda01	1882	2	PRO	NL	4	17	1	4	0	0	0	1			0	1
waittch01	1882	1	BL2	AA	72	250	19	39	4	0	0		0		13
walkeos01	1882	1	SL4	AA	76	318	48	76	15	7	7		0		10
wardjo01	1882	1	PRO	NL	83	355	58	87	10	3	1	39			13	22
weavesa01	1882	1	PH4	AA	43	155	19	36	3	0	0	8	0		12
welchmi01	1882	1	TRN	NL	38	151	26	37	6	0	1	17			5	16
wheelha01	1882	1	CN2	AA	76	344	59	86	11	11	1	29	0		7
whitede01	1882	1	BFN	NL	83	337	51	95	17	0	1	33			15	16
whitewi01	1882	1	CN2	AA	54	207	28	55	4	0	0	25	0		5
whitied01	1882	1	BL2	AA	74	308	43	80	14	5	0		0		7
whitnar01	1882	1	PRO	NL	11	40	2	3	0	0	0	1			2	11
whitnar01	1882	2	DTN	NL	31	115	10	21	0	0	0	4			1	12
whitnji01	1882	1	BSN	NL	61	251	49	81	18	7	5	48			24	13
wiedmst01	1882	1	DTN	NL	50	193	20	42	7	1	0	20			2	19
williju01	1882	1	DTN	NL	1	3	0	1	0	0	0	1			0	1
williju01	1882	2	CL2	NL	9	36	5	5	1	1	0	2			3	7
willine01	1882	1	CHN	NL	83	348	66	98	27	4	3	60			27	21
wisebi01	1882	1	BL2	AA	5	20	2	2	1	0	0	1	0		0
wisesa01	1882	1	BSN	NL	78	298	44	66	11	4	4	34			5	45
wolfji01	1882	1	LS2	AA	78	318	46	95	11	8	0		0		9
woodge01	1882	1	DTN	NL	84	375	69	101	12	12	7	29			14	30
wrighge01	1882	1	PRO	NL	46	185	14	30	1	2	0	9			4	36
wyliere01	1882	1	PT1	AA	1	3	0	0	0	0	0		0		0
yorkto01	1882	1	PRO	NL	81	321	48	86	23	7	1	40			19	14
allenmy01	1883	1	NY1	NL	1	4	0	0	0	0	0	1			0	2
allisdo01	1883	1	BL2	AA	1	3	2	2	0	0	0	0	0		0
ansonca01	1883	1	CHN	NL	98	413	70	127	36	5	0	68			18	9
bakelje01	1883	1	PH4	AA	8	26	4	5	1	0	0	2	0		6
bakerge01	1883	1	BL2	AA	7	22	0	5	0	0	0	0	0		0
bakerno01	1883	1	PT1	AA	4	12	1	0	0	0	0	1	0		0
bakerph01	1883	1	BL2	AA	28	121	22	33	2	1	1	0	0		8
barnibi01	1883	1	BL2	AA	17	55	7	11	0	0	0	0	0		2
barrbo01	1883	1	PT1	AA	37	142	12	35	4	3	0	0	0		5
battijo01	1883	1	PT1	AA	98	388	42	83	9	6	1	0	0		11
benedar01	1883	1	PHI	NL	3	15	3	4	1	0	0	4			0	4
bennech01	1883	1	DTN	NL	92	371	56	113	34	7	5	55			26	59
birchju01	1883	1	PH4	AA	96	448	95	108	10	1	1	24	0		20
blakibo01	1883	1	PH4	AA	44	167	26	41	3	3	0	26	0		9
bloggwe01	1883	1	PT1	AA	9	34	0	5	0	0	0	0	0		0
bradlge01	1883	1	CL2	NL	4	16	0	5	0	1	0	1			0	1
bradlge01	1883	2	PH4	AA	76	312	47	73	8	5	1	36	0		8
bradyst01	1883	1	NY4	AA	97	432	69	117	12	6	0	0	0		11
breital01	1883	1	PHI	NL	1	2	0	0	0	0	0	0			0	1
briodfa01	1883	1	CL2	NL	40	145	23	34	5	1	0	10			3	13
brougca01	1883	1	CL2	NL	4	10	2	2	0	0	0	1			2	2
brougca01	1883	2	BL2	AA	9	32	1	6	0	0	0	0	0		1
broutda01	1883	1	BFN	NL	98	425	85	159	41	17	3	97			16	17
brownle01	1883	1	BSN	NL	14	54	5	13	4	1	0	9			3	6
brownle01	1883	2	LS2	AA	14	60	6	11	2	1	0	0	0		1
brownpe01	1883	1	LS2	AA	84	358	95	121	15	9	4	0	0		23
brownto01	1883	1	CL5	AA	97	420	69	115	12	7	5	32	0		20
buffich01	1883	1	BSN	NL	86	341	28	81	8	3	1	26			6	24
burdoja01	1883	1	BSN	NL	96	400	80	132	27	8	5	88			14	35
burkeja01	1883	1	BFN	NL	1	5	0	1	0	0	0	1			0	3
burnsdi01	1883	1	DTN	NL	37	140	11	26	7	1	0	5			2	22
burnsto01	1883	1	CHN	NL	97	405	69	119	37	7	2	67			13	31
bushodo01	1883	1	CL2	NL	63	215	15	37	5	0	0	9			7	19
cadych01	1883	1	CL2	NL	3	11	0	0	0	0	0	0			1	5
carpehi01	1883	1	CN2	AA	95	435	99	130	18	4	3	40	0		19
carrocl01	1883	1	PRO	NL	58	238	37	63	12	3	1	20			4	28
caskied01	1883	1	NY1	NL	95	383	47	91	11	2	1	40			14	25
cassijo01	1883	1	PRO	NL	89	366	46	87	16	5	0	42			9	38
childsa01	1883	1	CL5	AA	1	3	0	0	0	0	0	0	0		0
clappjo01	1883	1	NY1	NL	20	73	6	13	0	0	0	5			5	4
clintji01	1883	1	BL2	AA	94	399	69	125	16	8	0	0	0		27
colemjo01	1883	1	PHI	NL	90	354	33	83	12	8	0	32			15	39
comisch01	1883	1	SL4	AA	96	401	87	118	17	9	2	64	0		11
connoro01	1883	1	NY1	NL	98	409	80	146	28	15	1	50			25	16
corcola01	1883	1	CHN	NL	68	263	40	55	12	7	0	25			6	62
coreyfr01	1883	1	PH4	AA	71	298	45	77	16	2	1	40	0		12
corkhpo01	1883	1	CN2	AA	88	375	53	81	10	8	2	46	0		3
cramedi01	1883	1	NY1	NL	2	6	0	0	0	0	0	0			1	5
cranesa01	1883	1	NY4	AA	96	349	57	82	8	5	0	0	0		13
creamge01	1883	1	PT1	AA	91	369	54	94	7	9	0	0	0		20
crowlbi01	1883	1	PH4	AA	23	96	16	24	4	3	0	16	0		3
crowlbi01	1883	2	CL2	NL	11	41	3	12	5	0	0	5			1	7
cushmed01	1883	1	BFN	NL	7	23	3	5	0	0	0	1			2	7
cuthbne01	1883	1	SL4	AA	21	71	3	12	1	0	0	3	0		4
dailyhu01	1883	1	CL2	NL	45	142	18	18	1	0	0	5			10	36
dalryab01	1883	1	CHN	NL	80	363	78	108	24	4	2	37			11	29
darlide01	1883	1	BFN	NL	6	18	1	3	0	0	0	1			2	5
deaglre01	1883	1	CN2	AA	19	70	9	9	2	0	0	5	0		1
deaslpa01	1883	1	SL4	AA	58	206	27	53	2	1	0	15	0		6
dennyje01	1883	1	PRO	NL	98	393	73	108	26	8	8	55			9	48
derbyge01	1883	1	BFN	NL	16	59	10	14	1	0	0	3			0	7
devinji01	1883	1	BL2	AA	2	9	4	2	0	0	0	0	0		0
dickebu01	1883	1	PT1	AA	85	354	62	88	15	1	0	0	0		18
dolanto01	1883	1	SL4	AA	81	295	32	63	9	2	1	18	0		9
dorgami01	1883	1	NY1	NL	64	261	32	61	11	3	0	27			2	23
doyleco01	1883	1	PHI	NL	16	68	3	15	3	2	0	3			0	15
driscde01	1883	1	PT1	AA	41	148	19	27	2	1	0	0	0		4
dundoed01	1883	1	CL5	AA	26	93	8	15	1	0	0	0	0		3
dunlafr01	1883	1	CL2	NL	93	396	81	129	34	2	4	37			22	21
eggleda01	1883	1	BL2	AA	53	202	15	38	2	0	0	7	0		1
eggleda01	1883	2	BFN	NL	38	153	13	38	2	1	0	13			2	29
emslibo01	1883	1	BL2	AA	27	97	14	16	1	2	0	0	0		6
esterdu01	1883	1	NY4	AA	97	407	55	103	9	7	0	0	0		15
evansja01	1883	1	CL2	NL	90	332	36	79	13	2	0	31			8	38
ewingbu01	1883	1	NY1	NL	88	376	90	114	11	13	10	41			20	14
ewingjo01	1883	1	SL4	AA	1	5	0	0	0	0	0	0	0		0
farrasi01	1883	1	PHI	NL	99	377	41	88	19	8	0	29			4	37
farrebi01	1883	1	BL2	AA	2	7	0	0	0	0	0	0	0		1
farreja02	1883	1	PRO	NL	95	420	92	128	24	11	3	61			15	21
farrejo01	1883	1	DTN	NL	101	444	58	108	13	5	0	36			5	29
fergubo01	1883	1	PHI	NL	86	329	39	85	9	2	0	27			18	21
fieldji01	1883	1	CL5	AA	76	292	31	75	10	6	1	0	0		7
flintsi01	1883	1	CHN	NL	85	332	57	88	23	4	0	32			3	69
foleycu01	1883	1	BFN	NL	23	111	23	30	5	3	0	6			4	12
forceda01	1883	1	BFN	NL	96	378	40	82	11	3	0	35			12	39
foxjo01	1883	1	BL2	AA	23	92	12	14	3	0	0	0	0		4
friespe01	1883	1	CL5	AA	3	10	1	3	1	0	0	0	0		1
fulmech01	1883	1	CN2	AA	92	362	52	92	13	5	5	52	0		12
gallabi01	1883	1	BL2	AA	16	61	9	10	3	1	0	0	0		3
gallabi01	1883	2	PHI	NL	2	8	1	0	0	0	0	0			0	4
galvipu01	1883	1	BFN	NL	80	322	41	71	11	2	1	19			3	79
gardngi01	1883	1	BL2	AA	42	161	28	44	10	3	1	0	0		18
gerhajo01	1883	1	LS2	AA	78	319	56	84	11	9	0	0	0		14
gillepe01	1883	1	NY1	NL	98	411	64	129	23	12	1	62			9	27
gilliba01	1883	1	PRO	NL	74	263	34	52	13	3	0	24			26	32
gladmbu01	1883	1	PHI	NL	1	4	1	0	0	0	0	0			0	2
glassja01	1883	1	CL2	NL	96	383	67	110	19	6	0	46			13	23
gleasbi01	1883	1	SL4	AA	98	425	81	122	21	9	2	42	0		15
gleasja01	1883	1	SL4	AA	9	34	2	8	0	0	0	0	0		4
gleasja01	1883	2	LS2	AA	84	355	69	106	11	4	2	0	0		25
goldsfr01	1883	1	CHN	NL	60	235	38	52	12	3	1	16			4	35
gorege01	1883	1	CHN	NL	92	392	105	131	30	9	2	52			27	13
gormaja01	1883	1	SL4	AA	1	4	0	0	0	0	0	0	0		0
grossem01	1883	1	PHI	NL	57	231	39	71	25	7	1	25			12	18
guinebe01	1883	1	DTN	NL	1	5	1	1	0	0	0	0			0	1
hackeme01	1883	1	BSN	NL	46	179	20	42	8	6	2	24			1	48
haganar01	1883	1	PHI	NL	17	59	3	6	1	1	0	3			0	20
haganar01	1883	2	BFN	NL	2	7	0	0	0	0	0	0			0	3
hankifr01	1883	1	NY1	NL	94	337	40	74	13	6	2	30			19	38
hanlone01	1883	1	DTN	NL	100	413	65	100	13	2	1	40			34	44
harbibi01	1883	1	PHI	NL	73	280	32	62	12	3	0	21			24	20
hayesja01	1883	1	PT1	AA	85	351	41	92	23	5	3	0	0		15
heckegu01	1883	1	LS2	AA	81	332	59	90	6	6	1	0	0		12
hendeha01	1883	1	PHI	NL	2	8	1	2	1	0	0	1			0	1
hendeha01	1883	2	BL2	AA	51	191	13	31	5	1	1	0	0		10
hilsech01	1883	1	PHI	NL	3	10	0	1	0	0	0	1			0	4
hinesmi01	1883	1	BSN	NL	63	231	38	52	13	1	0	16			7	36
hinespa01	1883	1	PRO	NL	97	442	94	132	32	4	4	45			18	23
hodnech01	1883	1	SL4	AA	4	11	3	2	0	0	0	0	0		2
holbebi01	1883	1	NY4	AA	73	299	26	71	9	1	0	0	0		1
hornujo01	1883	1	BSN	NL	98	446	107	124	25	13	8	66			8	54
hotalpe01	1883	1	CL2	NL	100	417	54	108	20	8	0	30			12	31
houcksa01	1883	1	DTN	NL	101	416	52	105	18	12	0	40			9	18
hubbaal01	1883	1	PH4	AA	2	6	2	2	0	0	0	2	0		1
humphjo01	1883	1	NY1	NL	29	107	5	12	1	0	0	4			1	22
huntele01	1883	1	CL2	NL	1	4	1	1	0	0	0	0			0	2
ingrach01	1883	1	BL2	AA	1	4	0	1	0	0	0	0	0		0
irwinar01	1883	1	PRO	NL	98	406	67	116	22	7	0	44			12	38
jonesch01	1883	1	CN2	AA	90	391	84	115	15	12	10	80	0		20
jonesja01	1883	1	LS2	AA	2	7	1	0	0	0	0	0	0		0
jonesja02	1883	1	DTN	NL	12	42	3	8	1	0	0	3			1	11
jonesja02	1883	2	PH4	AA	7	25	3	6	1	0	0	1	0		1
keefeti01	1883	1	NY4	AA	70	259	39	57	6	9	0	0	0		14
kellych01	1883	1	PHI	NL	2	7	1	1	0	1	0	0			0	3
kellyjo01	1883	1	BL2	AA	48	202	18	46	9	2	0	0	0		3
kellyjo01	1883	2	PHI	NL	1	3	0	0	0	0	0	0			0	2
kellyki01	1883	1	CHN	NL	98	428	92	109	28	10	3	61			16	35
kemmlru01	1883	1	CL5	AA	84	318	27	66	6	2	0	0	0		13
kennedo01	1883	1	BFN	NL	5	19	3	6	0	0	0	2			2	2
kenneed01	1883	1	NY4	AA	94	356	57	78	6	7	2	0	0		17
knighlo01	1883	1	PH4	AA	97	429	98	108	23	9	1	53	0		21
kuehnbi01	1883	1	CL5	AA	95	374	38	85	8	14	1	0	0		2
lathaar01	1883	1	SL4	AA	98	406	86	96	12	7	0	0	0		18
lathaju01	1883	1	LS2	AA	88	368	60	92	7	6	0	0	0		12
learyja01	1883	1	LS2	AA	40	165	16	31	1	3	3	0	0		2
learyja01	1883	2	BL2	AA	3	11	1	2	0	2	0	0	0		0
lewisfr01	1883	1	PHI	NL	38	160	21	40	7	0	0	18			4	13
lewisfr01	1883	2	SL4	AA	49	209	37	63	8	4	1	33	0		1
lilliji01	1883	1	BFN	NL	50	201	25	47	7	3	1	29			1	31
loftuto01	1883	1	SL4	AA	6	22	1	4	0	0	0	0	0		2
lough01	1883	1	BL2	AA	1	5	0	2	0	0	0	0	0		0
luffhe01	1883	1	LS2	AA	6	23	1	4	0	0	0	2	0		0
lynchja01	1883	1	NY4	AA	29	107	9	20	2	1	0	0	0		4
mackde01	1883	1	PT1	AA	60	224	26	44	5	3	0	0	0		13
maculji01	1883	1	CN2	AA	14	48	4	8	2	0	0	4	0		4
mannfr01	1883	1	CL5	AA	96	394	61	98	18	13	1	0	0		18
mannija01	1883	1	PHI	NL	98	420	60	112	31	5	0	37			20	37
manniti01	1883	1	BL2	AA	35	121	23	26	5	0	0	0	0		14
mansemi01	1883	1	PT1	AA	96	412	90	106	12	13	3	0	0		25
manseto01	1883	1	DTN	NL	34	131	22	29	4	1	0	10			8	13
manseto01	1883	2	SL4	AA	28	112	23	45	8	1	0	24	0		7
maskrle01	1883	1	LS2	AA	96	361	50	73	13	8	1	0	0		10
masonch01	1883	1	PH4	AA	1	2	0	1	0	0	0	1	0		0
mathebo01	1883	1	PH4	AA	45	167	15	31	2	0	0	11	0		5
mccafha01	1883	1	SL4	AA	5	18	0	1	0	0	0	1	0		1
mcclebi01	1883	1	PHI	NL	80	326	42	75	21	4	1	33			19	18
mccorha01	1883	1	CN2	AA	15	55	8	17	2	1	0	11	0		2
mccorje01	1883	1	BL2	AA	93	389	40	102	16	6	0	0	0		2
mccorji01	1883	1	CL2	NL	43	157	21	37	2	2	0	13			2	14
mcginju01	1883	1	SL4	AA	45	180	20	36	4	2	0	14	0		0
mcintfr01	1883	1	DTN	NL	1	4	1	0	0	0	0	0			1	1
mcintfr01	1883	2	CL5	AA	2	7	0	0	0	0	0	0	0		2
mclaufr01	1883	1	PT1	AA	29	114	15	25	2	0	1	0	0		6
mclauto01	1883	1	LS2	AA	42	146	16	28	1	2	0	0	0		5
mcphebi01	1883	1	CN2	AA	96	367	61	90	10	10	2	42	0		18
morgabi02	1883	1	PT1	AA	32	114	12	18	2	1	0	0	0		7
morrijo01	1883	1	BSN	NL	97	404	83	129	33	16	6	68			15	68
mountbi01	1883	1	CN2	AA	1	3	0	0	0	0	0	0	0		0
mountfr01	1883	1	CL5	AA	70	276	36	60	14	5	3	0	0		9
moynami01	1883	1	PH4	AA	95	400	90	124	18	10	1	67	0		31
muldomi01	1883	1	CL2	NL	98	378	54	86	22	3	0	29			10	39
mullato01	1883	1	SL4	AA	83	307	38	69	11	6	0	33	0		13
mulvejo01	1883	1	PRO	NL	4	16	1	2	1	0	0	2			0	1
mulvejo01	1883	2	PHI	NL	3	12	2	6	1	0	0	3			0	1
navasa01	1883	1	PRO	NL	29	100	18	24	4	2	0	16			3	17
neaglja01	1883	1	PHI	NL	18	73	6	12	1	0	0	4			1	9
neaglja01	1883	2	BL2	AA	9	35	3	10	4	0	0	0	0		2
neaglja01	1883	3	PT1	AA	27	101	14	19	0	1	0	0	0		5
nelsoca01	1883	1	NY4	AA	97	417	75	127	19	6	0	0	0		31
nicolhu01	1883	1	SL4	AA	94	368	73	105	13	3	0	39	0		18
nolanth01	1883	1	PT1	AA	7	26	4	8	1	0	0	0	0		1
oberbhe01	1883	1	PT1	AA	2	9	1	2	1	0	0	0	0		0
oberbhe01	1883	2	SL4	AA	4	14	0	0	0	0	0	0	0		0
obrieja01	1883	1	PH4	AA	94	390	74	113	14	10	0	70	0		25
obrieto01	1883	1	BL2	AA	33	138	16	37	6	4	0	0	0		5
oldfida01	1883	1	BL2	AA	1	4	0	0	0	0	0	0	0		0
oneilti01	1883	1	NY1	NL	23	76	8	15	3	0	0	5			3	15
orourji01	1883	1	BFN	NL	94	436	102	143	29	8	1	38			15	13
orourjo01	1883	1	NY4	AA	77	315	49	85	19	5	2	0	0		21
orrda01	1883	1	NY4	AA	1	4	1	1	1	0	0	0	0		0
orrda01	1883	2	NY1	NL	1	3	0	0	0	0	0	0			0	1
orrda01	1883	3	NY4	AA	12	46	5	15	3	3	2	11	0		0
peterjo01	1883	1	PT1	AA	8	28	3	3	0	0	0	0	0		0
pfefffr01	1883	1	CHN	NL	96	371	41	87	22	7	1	45			8	50
phillbi01	1883	1	CL2	NL	97	382	42	94	29	8	2	40			8	49
piercgr01	1883	1	CL5	AA	11	41	5	7	0	0	0	0	0		0
piercgr01	1883	2	NY1	NL	18	62	3	5	0	1	0	2			1	9
pirieji01	1883	1	PHI	NL	5	19	1	3	0	0	0	0			0	2
powelma01	1883	1	DTN	NL	101	421	76	115	17	5	1	48			28	23
powerph01	1883	1	CN2	AA	30	114	16	28	1	4	0	8	0		3
princwa01	1883	1	LS2	AA	4	11	1	2	0	0	0	0	0		0
purcebl01	1883	1	PHI	NL	97	425	70	114	20	5	1	32			13	26
questjo01	1883	1	DTN	NL	37	137	22	32	8	2	0	15			10	18
questjo01	1883	2	SL4	AA	19	78	12	20	3	1	0	10	0		1
radboch01	1883	1	PRO	NL	89	381	59	108	11	3	3	48			14	16
radboge01	1883	1	DTN	NL	3	12	2	2	0	0	0	0			0	5
radfopa01	1883	1	BSN	NL	72	258	46	53	6	3	0	14			9	26
reccijo01	1883	1	LS2	AA	18	63	10	9	2	0	0	3	0		7
recciph01	1883	1	LS2	AA	1	3	1	1	1	0	0	0	0		0
reidbi01	1883	1	BL2	AA	24	97	14	27	3	0	0	0	0		4
reilljo01	1883	1	CN2	AA	98	437	103	136	21	14	9	79	0		9
reipsch01	1883	1	NY4	AA	37	145	8	27	4	2	0	0	0		4
richaha01	1883	1	BFN	NL	92	399	73	124	34	7	1	56			22	20
richmjo01	1883	1	CL5	AA	92	385	63	109	7	8	0	0	0		25
richmle01	1883	1	PRO	NL	49	194	41	55	8	6	1	19			15	19
ringofr01	1883	1	PHI	NL	60	221	24	42	10	1	0	12			6	34
rosemch01	1883	1	NY4	AA	93	398	48	100	13	6	0	0	0		11
roweda01	1883	1	BL2	AA	59	256	40	80	11	6	0	0	0		2
roweja01	1883	1	BFN	NL	87	374	65	104	18	7	1	38			15	14
rowened01	1883	1	PH4	AA	49	196	28	43	10	1	0	21	0		11
sawyewi01	1883	1	CL2	NL	17	47	3	1	0	0	0	0			3	19
saylo01	1883	1	BL2	AA	74	324	52	83	13	2	1	0	0		10
scharni01	1883	1	BL2	AA	3	13	1	2	1	0	0	0	0		1
schwabi01	1883	1	CL5	AA	2	4	0	1	0	0	0	0	0		0
shaffor01	1883	1	BFN	NL	95	401	67	117	11	3	0	41			27	39
shawdu01	1883	1	DTN	NL	38	141	13	29	3	0	0	5			3	36
smithed01	1883	1	PRO	NL	2	9	2	2	1	0	0	1			0	2
smithed01	1883	2	PHI	NL	1	4	1	3	0	0	0	1			0	0
smithed02	1883	1	BSN	NL	30	115	10	25	5	3	0	16			5	11
smithpo01	1883	1	CL5	AA	97	405	82	106	14	17	4	0	0		22
snydepo01	1883	1	CN2	AA	58	250	38	64	14	6	0	34	0		8
sommejo01	1883	1	CN2	AA	97	413	79	115	5	7	3	52	0		20
startjo01	1883	1	PRO	NL	87	370	63	105	16	7	1	57			22	16
stearec01	1883	1	BL2	AA	93	382	54	94	10	9	1	0	0		34
stoveha01	1883	1	PH4	AA	94	421	110	128	31	6	14	66	0		27
straujo01	1883	1	CL5	AA	27	100	4	13	0	0	0	0	0		4
striccu01	1883	1	PH4	AA	89	330	67	90	8	0	1	40	0		19
striege01	1883	1	SL4	AA	82	302	22	68	9	0	1	22	0		12
suckto01	1883	1	BFN	NL	2	7	1	0	0	0	0	0			1	4
sullida01	1883	1	LS2	AA	37	147	8	31	5	2	0	0	0		3
sullisl01	1883	1	SL4	AA	8	27	2	6	0	1	0	0	0		0
sullisl01	1883	2	LS2	AA	1	2	0	0	0	0	0	0	0		0
sundabi01	1883	1	CHN	NL	14	54	6	13	4	0	0	5			1	18
suttoez01	1883	1	BSN	NL	94	414	101	134	28	15	3	73			17	12
swarted01	1883	1	PT1	AA	94	412	86	147	24	8	3	0	0		25
sweench01	1883	1	PRO	NL	22	87	9	19	3	0	0	15			2	10
sweenro01	1883	1	BL2	AA	25	101	13	21	5	2	0	0	0		4
taylobi01	1883	1	PT1	AA	83	369	43	96	13	7	2	0	0		9
traffbi01	1883	1	CN2	AA	30	105	17	21	5	0	0	8	0		4
trottsa01	1883	1	DTN	NL	75	295	27	72	14	1	0	29			10	23
troyda01	1883	1	NY1	NL	85	316	37	68	7	5	0	20			9	33
valenjo01	1883	1	CL5	AA	16	60	9	17	4	0	0	0	0		2
waittch01	1883	1	PHI	NL	1	3	0	1	0	0	0	0			0	1
wardjo01	1883	1	NY1	NL	88	380	76	97	18	7	7	54			8	25
wardpi01	1883	1	PHI	NL	1	5	0	0	0	0	0	0			0	2
warnefr01	1883	1	PHI	NL	39	141	13	32	6	1	0	13			5	21
weavesa01	1883	1	LS2	AA	53	193	19	37	6	1	0	0	0		12
weihepo01	1883	1	CN2	AA	1	4	1	1	0	0	0	0	0		0
welchmi01	1883	1	NY1	NL	84	320	42	75	13	5	2	30			10	38
wheelha01	1883	1	CL5	AA	82	371	42	84	6	7	0	0	0		6
whitebi02	1883	1	PHI	NL	1	1	0	0	0	0	0	0			0	0
whitede01	1883	1	BFN	NL	94	391	62	114	14	5	0	47			23	18
whitewi01	1883	1	CN2	AA	65	240	38	54	4	3	0	23	0		16
whitied01	1883	1	LS2	AA	58	240	35	70	16	4	2	0	0		9
whitnji01	1883	1	BSN	NL	96	409	78	115	27	10	5	57			25	29
wiedmst01	1883	1	DTN	NL	79	313	34	58	6	1	1	24			4	38
willine01	1883	1	CHN	NL	98	402	83	111	49	5	2	59			22	48
winklge01	1883	1	LS2	AA	4	13	2	0	0	0	0	0	0		1
wisesa01	1883	1	BSN	NL	96	406	73	110	25	7	4	58			13	74
wolfji01	1883	1	LS2	AA	98	389	59	102	17	9	1	0	0		5
wolstab01	1883	1	PHI	NL	3	11	0	1	1	0	0	0			0	0
woodge01	1883	1	DTN	NL	99	441	81	133	26	11	5	47			25	37
yorkto01	1883	1	CL2	NL	100	381	56	99	29	5	2	46			37	55
akejo01	1884	1	BL2	AA	13	52	1	10	0	1	0	2	0		0			1
albergu01	1884	1	PT1	AA	2	5	1	1	0	0	0	0	0		0			0
albergu01	1884	2	WSU	UA	4	16	4	4	0	0	0		0		4
alexani01	1884	1	KCU	UA	19	65	2	9	0	0	0		0		1
alexani01	1884	2	SL4	AA	1	4	0	0	0	0	0	0	0		0			0
allenhe01	1884	1	PHI	NL	1	3	0	2	0	0	0	0			0	0
andreed01	1884	1	PHI	NL	109	420	74	93	21	2	0	23			9	42
andrewa01	1884	1	LS2	AA	14	49	10	10	5	1	0	8	0		4			0
andrufr01	1884	1	CHN	NL	1	5	3	1	0	0	0	0			1	0
annisbi01	1884	1	BSN	NL	27	96	17	17	2	0	0	3			0	8
ansonca01	1884	1	CHN	NL	112	475	108	159	30	3	21	102			29	13
ardnejo01	1884	1	CL2	NL	26	92	6	16	1	1	0	4			1	24
arundha01	1884	1	PRO	NL	1	3	2	1	0	0	0	1			1	1
arundtu01	1884	1	TL1	AA	15	47	6	4	0	0	0	0	0		3			0
atkinal01	1884	1	PH4	AA	22	83	13	16	3	1	0	0	0		4			1
atkinal01	1884	2	CHU	UA	19	68	4	14	0	0	0		0		0
atkinal01	1884	3	BLU	UA	8	29	3	4	1	0	0		0		1
aydelja01	1884	1	IN2	AA	12	44	1	5	1	0	0	0	0		2			0
bahrefr01	1884	1	BLU	UA	2	8	0	0	0	0	0		0		0
bakelje01	1884	1	PHU	UA	45	167	21	22	4	2	0		0		11
bakelje01	1884	2	WIL	UA	2	5	0	0	0	0	0		0		1
bakelje01	1884	3	KCU	UA	6	20	3	3	1	0	0		0		1
bakerch01	1884	1	CHU	UA	15	57	5	8	2	0	1		0		0
bakerge01	1884	1	SLU	UA	80	317	39	52	6	0	0		0		5
bakerph01	1884	1	WSU	UA	86	371	75	107	12	5	1		0		11
baldwki01	1884	1	KCU	UA	50	191	19	37	6	3	0		0		4
baldwki01	1884	2	CHU	UA	1	1	0	1	0	0	0		0		0
baldwla01	1884	1	MLU	UA	7	27	6	6	3	0	0		0		0
barbech01	1884	1	CNU	UA	55	204	38	41	1	4	0		0		11
barklsa01	1884	1	TL1	AA	104	435	71	133	39	9	1	0	0		22			2
barnebi01	1884	1	SPU	UA	8	30	2	6	1	0	0		0		0
barrbo01	1884	1	WS7	AA	39	135	15	20	3	1	2	0	0		4			2
barrbo01	1884	2	IN2	AA	18	65	6	12	3	2	0	0	0		3			0
[truncated: 100,817 more rows]
