# Supplementary material for: Ten quick tips for getting the most scientific value out of numerical data
Source: PLoS Comput Biol. 2018 Oct 11;14(10):e1006141. doi: 10.1371/journal.pcbi.1006141 (PMC6181270; doi:10.1371/journal.pcbi.1006141)
Supplement: S3 Data — This archive contains selected tables of the Lahman Baseball Database [41] (in comma-separated values format) by Sean Lahman, licensed under a Creative Commons Attribution-ShareAlike 3.0 Unported License [42], and our Python code implementing the calculations described in Supporting Information S1 Text. (TGZ) [file pcbi.1006141.s004.tgz › pValueHackingExample/data/Fielding.csv]

playerID	yearID	stint	teamID	lgID	POS	G	GS	InnOuts	PO	A	E	DP	PB	WP	SB	CS	ZR
abercda01	1871	1	TRO	NA	SS	1			1	3	2	0
addybo01	1871	1	RC1	NA	2B	22			67	72	42	5
addybo01	1871	1	RC1	NA	SS	3			8	14	7	0
allisar01	1871	1	CL1	NA	2B	2			1	4	0	0
allisar01	1871	1	CL1	NA	OF	29			51	3	7	1
allisdo01	1871	1	WS3	NA	C	27			68	15	20	4	0
ansonca01	1871	1	RC1	NA	1B	1			7	0	0	0
ansonca01	1871	1	RC1	NA	2B	2			3	4	1	0
ansonca01	1871	1	RC1	NA	3B	20			38	52	28	2
ansonca01	1871	1	RC1	NA	C	5			10	0	8	0	0
ansonca01	1871	1	RC1	NA	OF	1			0	0	0	0
armstbo01	1871	1	FW1	NA	OF	12			29	2	7	0
barkeal01	1871	1	RC1	NA	OF	1			2	0	0	0
barnero01	1871	1	BS1	NA	2B	16			42	61	15	10
barnero01	1871	1	BS1	NA	SS	15			44	64	21	3
barrebi01	1871	1	FW1	NA	3B	1			1	0	0	0
barrebi01	1871	1	FW1	NA	C	1			8	0	0	0	0
barrofr01	1871	1	BS1	NA	2B	1			2	0	1	0
barrofr01	1871	1	BS1	NA	OF	17			28	1	6	0
bassjo01	1871	1	CL1	NA	C	1			4	0	1	0	0
bassjo01	1871	1	CL1	NA	SS	22			41	61	29	3
battijo01	1871	1	CL1	NA	OF	1			1	0	0	0
bealsto01	1871	1	WS3	NA	2B	2			9	7	0	1
bealsto01	1871	1	WS3	NA	OF	8			20	1	6	0
beaveed01	1871	1	TRO	NA	2B	3			8	10	4	2
bechtge01	1871	1	PH1	NA	3B	3			3	3	2	0
bechtge01	1871	1	PH1	NA	OF	15			21	2	5	1
bechtge01	1871	1	PH1	NA	P	3			1	7	0	0
bellast01	1871	1	TRO	NA	3B	28			48	49	39	4
bellast01	1871	1	TRO	NA	SS	1			1	4	0	0
berkena01	1871	1	PH1	NA	OF	1			3	0	0	0
berryto01	1871	1	PH1	NA	OF	1			0	0	1	0
berthha01	1871	1	WS3	NA	2B	5			16	10	7	1
berthha01	1871	1	WS3	NA	C	1			0	0	1	0	0
berthha01	1871	1	WS3	NA	OF	12			29	0	7	0
biermch01	1871	1	FW1	NA	1B	1			9	0	2	0
birdge01	1871	1	RC1	NA	OF	25			32	2	11	0
birdsda01	1871	1	BS1	NA	C	7			9	6	2	0	0
birdsda01	1871	1	BS1	NA	OF	27			27	3	9	1
brainas01	1871	1	WS3	NA	P	30			18	28	8	1
brannmi01	1871	1	CH1	NA	3B	3			3	2	5	0
burrohe01	1871	1	WS3	NA	2B	1			1	0	1	0
burrohe01	1871	1	WS3	NA	3B	5			10	11	9	0
burrohe01	1871	1	WS3	NA	OF	8			11	1	5	0
careyto01	1871	1	FW1	NA	2B	19			58	50	18	5
carleji01	1871	1	CL1	NA	1B	29			295	4	34	10
conefr01	1871	1	BS1	NA	OF	18			39	2	7	0
connone01	1871	1	TRO	NA	1B	4			35	1	5	1
connone01	1871	1	TRO	NA	OF	3			4	1	4	0
cravebi01	1871	1	TRO	NA	1B	2			18	1	1	1
cravebi01	1871	1	TRO	NA	2B	18			57	50	16	11
cravebi01	1871	1	TRO	NA	C	3			10	4	1	0	0
cravebi01	1871	1	TRO	NA	OF	1			0	0	0	0
cravebi01	1871	1	TRO	NA	SS	4			6	12	4	3
cuthbne01	1871	1	PH1	NA	C	1			2	1	1	0	0
cuthbne01	1871	1	PH1	NA	OF	27			78	3	10	0
deaneha01	1871	1	FW1	NA	OF	6			21	0	0	0
donnepe01	1871	1	FW1	NA	3B	2			1	1	8	0
donnepe01	1871	1	FW1	NA	OF	9			5	0	2	0
duffyed01	1871	1	CH1	NA	3B	1			0	0	1	0
duffyed01	1871	1	CH1	NA	SS	26			42	90	44	5
eggleda01	1871	1	NY2	NA	OF	33			88	3	9	1
ewellge01	1871	1	CL1	NA	OF	1			1	0	0	0
fergubo01	1871	1	NY2	NA	2B	11			29	22	13	4
fergubo01	1871	1	NY2	NA	3B	20			31	58	26	3
fergubo01	1871	1	NY2	NA	C	5			19	0	4	0	0
fergubo01	1871	1	NY2	NA	P	1			0	0	0	0
fishech01	1871	1	RC1	NA	1B	2			12	0	1	0
fishech01	1871	1	RC1	NA	2B	1			1	1	1	0
fishech01	1871	1	RC1	NA	P	24			22	54	6	3
fislewe01	1871	1	PH1	NA	1B	26			240	1	7	9
fislewe01	1871	1	PH1	NA	2B	2			6	2	2	0
fleetfr01	1871	1	NY2	NA	P	1			0	5	0	0
flowedi01	1871	1	TRO	NA	2B	1			1	4	2	0
flowedi01	1871	1	TRO	NA	P	1			0	0	0	0
flowedi01	1871	1	TRO	NA	SS	20			28	72	30	8
flynncl01	1871	1	TRO	NA	1B	19			183	8	9	12
flynncl01	1871	1	TRO	NA	2B	1			2	3	2	0
flynncl01	1871	1	TRO	NA	3B	1			2	4	2	0
flynncl01	1871	1	TRO	NA	OF	8			16	2	7	2
foleyto01	1871	1	CH1	NA	3B	1			2	1	1	0
foleyto01	1871	1	CH1	NA	C	4			13	1	8	0	0
foleyto01	1871	1	CH1	NA	OF	16			18	1	11	0
foranji01	1871	1	FW1	NA	1B	16			111	4	16	2
foranji01	1871	1	FW1	NA	OF	4			11	1	2	0
forceda01	1871	1	WS3	NA	3B	1			2	2	1	0
forceda01	1871	1	WS3	NA	SS	31			46	159	38	7
fulmech01	1871	1	RC1	NA	1B	1			9	0	0	0
fulmech01	1871	1	RC1	NA	SS	16			29	65	28	4
glennjo01	1871	1	WS3	NA	OF	26			34	3	6	2
goldswa01	1871	1	FW1	NA	3B	8			10	5	14	0
goldswa01	1871	1	FW1	NA	C	2			4	0	4	0	0
goldswa01	1871	1	FW1	NA	SS	14			27	29	17	1
gouldch01	1871	1	BS1	NA	1B	30			343	3	36	21
gouldch01	1871	1	BS1	NA	OF	1			2	0	1	0
hallge01	1871	1	WS3	NA	OF	32			92	3	9	0
halliji01	1871	1	FW1	NA	SS	5			8	11	21	0
hamra01	1871	1	RC1	NA	3B	7			5	6	13	0
hamra01	1871	1	RC1	NA	OF	19			29	5	13	1
hamra01	1871	1	RC1	NA	SS	2			2	8	4	1
hastisc01	1871	1	RC1	NA	1B	1			4	0	1	0
hastisc01	1871	1	RC1	NA	2B	2			4	5	1	0
hastisc01	1871	1	RC1	NA	C	23			77	18	16	3	0
hastisc01	1871	1	RC1	NA	OF	2			1	0	0	0
hatfijo01	1871	1	NY2	NA	2B	7			22	16	6	2
hatfijo01	1871	1	NY2	NA	3B	2			4	4	5	0
hatfijo01	1871	1	NY2	NA	OF	24			79	2	14	0
heubege01	1871	1	PH1	NA	1B	1			6	0	0	0
heubege01	1871	1	PH1	NA	OF	16			22	3	8	0
highadi01	1871	1	NY2	NA	2B	12			29	30	20	3
highadi01	1871	1	NY2	NA	C	1			6	0	2	0	0
highadi01	1871	1	NY2	NA	OF	8			14	0	4	0
hodesch01	1871	1	CH1	NA	3B	10			10	27	23	1
hodesch01	1871	1	CH1	NA	C	20			64	18	21	2	0
hodesch01	1871	1	CH1	NA	OF	4			2	0	0	0
hodesch01	1871	1	CH1	NA	SS	1			1	1	0	0
jackssa01	1871	1	BS1	NA	2B	14			38	43	18	1
jackssa01	1871	1	BS1	NA	OF	1			0	0	0	0
jackssa01	1871	1	BS1	NA	SS	1			0	0	1	0
johnsca01	1871	1	CL1	NA	2B	10			30	23	19	3
johnsca01	1871	1	CL1	NA	OF	6			5	0	3	0
kellybi01	1871	1	FW1	NA	OF	18			34	1	7	1
kimbage01	1871	1	CL1	NA	2B	17			49	35	29	3
kimbage01	1871	1	CL1	NA	3B	2			1	2	2	0
kimbage01	1871	1	CL1	NA	OF	9			13	1	5	1
kimbage01	1871	1	CL1	NA	SS	6			8	17	8	0
kingma01	1871	1	CH1	NA	3B	1			1	1	0	0
kingma01	1871	1	CH1	NA	C	9			22	5	8	0	0
kingma01	1871	1	CH1	NA	OF	11			11	0	3	0
kingma01	1871	1	CH1	NA	SS	3			1	15	6	0
kingst01	1871	1	TRO	NA	OF	29			69	6	15	0
kohlehe01	1871	1	FW1	NA	1B	2			17	0	1	0
kohlehe01	1871	1	FW1	NA	3B	1			4	0	1	0
kohlehe01	1871	1	FW1	NA	C	2			0	0	0	0	0
lennobi01	1871	1	FW1	NA	C	12			43	4	6	0	0
lennobi01	1871	1	FW1	NA	OF	1			0	0	1	0
lennobi01	1871	1	FW1	NA	SS	2			1	4	7	1
leonaan01	1871	1	WS3	NA	2B	19			51	50	16	6
leonaan01	1871	1	WS3	NA	OF	11			16	3	9	0
leonaan01	1871	1	WS3	NA	SS	1			2	3	2	0
mackde01	1871	1	RC1	NA	1B	24			271	6	19	11
mackde01	1871	1	RC1	NA	OF	1			1	0	0	0
mackde01	1871	1	RC1	NA	P	3			1	2	0	0
mackde01	1871	1	RC1	NA	SS	1			1	2	1	0
malonfe01	1871	1	PH1	NA	C	27			122	32	26	2	0
mathebo01	1871	1	FW1	NA	P	19			19	23	8	2
mcatebu01	1871	1	CH1	NA	1B	26			276	5	17	14
mcbridi01	1871	1	PH1	NA	P	25			20	33	7	2
mcderjo01	1871	1	FW1	NA	OF	2			0	1	1	0
mcgeami01	1871	1	TRO	NA	C	26			82	22	12	2	0
mcgeami01	1871	1	TRO	NA	SS	3			9	9	4	0
mcmuljo01	1871	1	TRO	NA	P	29			11	43	8	1
mcmuljo01	1871	1	TRO	NA	SS	1			0	1	0	1
mcveyca01	1871	1	BS1	NA	3B	1			0	0	0	0
mcveyca01	1871	1	BS1	NA	C	29			105	12	17	1	0
mcveyca01	1871	1	BS1	NA	OF	5			2	0	1	0
meyerle01	1871	1	PH1	NA	3B	26			43	39	45	1
meyerle01	1871	1	PH1	NA	P	1			0	1	0	0
millsch01	1871	1	NY2	NA	3B	1			1	0	0	0
millsch01	1871	1	NY2	NA	C	29			110	19	20	1	0
millsch01	1871	1	NY2	NA	OF	4			1	0	0	0
millsev01	1871	1	WS3	NA	1B	32			343	5	12	16
minched01	1871	1	FW1	NA	OF	9			23	0	4	0
nortofr01	1871	1	WS3	NA	3B	1			0	0	1	0
nortofr01	1871	1	WS3	NA	OF	1			0	0	0	0
paborch01	1871	1	CL1	NA	OF	28			31	3	10	0
paborch01	1871	1	CL1	NA	P	7			2	7	2	0
patteda01	1871	1	NY2	NA	2B	2			1	5	0	1
patteda01	1871	1	NY2	NA	OF	31			40	2	9	0
pearcdi01	1871	1	NY2	NA	SS	33			27	115	37	8
phelpne01	1871	1	FW1	NA	1B	1			8	0	1	1
pikeli01	1871	1	TRO	NA	1B	4			44	0	5	3
pikeli01	1871	1	TRO	NA	2B	7			24	16	9	2
pikeli01	1871	1	TRO	NA	OF	18			31	3	6	0
pinkhed01	1871	1	CH1	NA	3B	18			30	56	28	1
pinkhed01	1871	1	CH1	NA	OF	8			13	1	3	0
pinkhed01	1871	1	CH1	NA	P	3			0	2	1	0
prattal01	1871	1	CL1	NA	OF	7			3	0	1	0
prattal01	1871	1	CL1	NA	P	28			22	44	9	3
prattto01	1871	1	PH1	NA	1B	1			11	0	3	0
questjo01	1871	1	CL1	NA	2B	2			2	6	6	0
questjo01	1871	1	CL1	NA	SS	1			1	0	1	0
quinnpa02	1871	1	FW1	NA	C	5			21	6	1	0	0
radcljo01	1871	1	PH1	NA	SS	28			40	116	38	5
reachal01	1871	1	PH1	NA	2B	26			83	68	28	10
sagerpo01	1871	1	RC1	NA	OF	4			4	0	2	0
sagerpo01	1871	1	RC1	NA	SS	4			5	13	10	0
schafha01	1871	1	BS1	NA	3B	31			49	79	59	7
selmafr01	1871	1	FW1	NA	3B	14			24	8	13	2
selmafr01	1871	1	FW1	NA	C	5			9	2	0	0	0
selmafr01	1871	1	FW1	NA	SS	2			1	6	1	1
senseco01	1871	1	PH1	NA	OF	25			46	2	11	1
simmojo01	1871	1	CH1	NA	1B	2			18	0	2	0
simmojo01	1871	1	CH1	NA	OF	25			41	1	5	0
smithch01	1871	1	NY2	NA	2B	3			6	5	4	2
smithch01	1871	1	NY2	NA	3B	12			27	26	24	1
spaldal01	1871	1	BS1	NA	OF	9			3	0	0	0
spaldal01	1871	1	BS1	NA	P	31			11	48	17	2
startjo01	1871	1	NY2	NA	1B	33			334	2	29	11
stearbi01	1871	1	WS3	NA	P	2			0	5	1	0
stirega01	1871	1	RC1	NA	OF	25			33	3	7	0
suttoez01	1871	1	CL1	NA	3B	29			40	53	24	3
suttoez01	1871	1	CL1	NA	C	1			0	0	1	0	0
suttoez01	1871	1	CL1	NA	OF	2			1	0	0	0
sweasch01	1871	1	WS3	NA	2B	5			13	13	7	0
treacfr01	1871	1	CH1	NA	OF	25			71	7	7	1
waterfr01	1871	1	WS3	NA	3B	28			47	67	50	6
waterfr01	1871	1	WS3	NA	C	6			17	5	2	0	0
whitede01	1871	1	CL1	NA	2B	1			2	0	0	0
whitede01	1871	1	CL1	NA	3B	1			0	1	0	0
whitede01	1871	1	CL1	NA	C	29			136	20	34	3	0
whitede01	1871	1	CL1	NA	OF	1			0	0	0	0
whitede01	1871	1	CL1	NA	SS	2			0	3	2	0
whiteel01	1871	1	CL1	NA	C	3			5	3	2	0	0
whiteel01	1871	1	CL1	NA	OF	15			17	1	5	0
whitewa01	1871	1	WS3	NA	2B	1			1	1	0	0
woltery01	1871	1	NY2	NA	3B	1			0	2	1	0
woltery01	1871	1	NY2	NA	P	32			11	40	8	1
woodji01	1871	1	CH1	NA	2B	28			105	83	24	11
wrighge01	1871	1	BS1	NA	1B	1			9	1	0	1
wrighge01	1871	1	BS1	NA	SS	15			32	61	21	8
wrighha01	1871	1	BS1	NA	OF	30			42	5	8	1
wrighha01	1871	1	BS1	NA	P	9			1	5	1	0
wrighha01	1871	1	BS1	NA	SS	1			0	3	2	0
yorkto01	1871	1	TRO	NA	OF	29			60	5	11	2
zettlge01	1871	1	CH1	NA	OF	3			1	0	1	0
zettlge01	1871	1	CH1	NA	P	28			8	41	10	2
allenha01	1872	1	MID	NA	OF	9			10	5	5	1
allenha01	1872	1	MID	NA	SS	8			6	31	8	0
allisan01	1872	1	BR1	NA	1B	22			229	2	22	5
allisan01	1872	1	BR1	NA	OF	1			0	0	2	0
allisar01	1872	1	CL1	NA	OF	19			39	2	10	1
allisbi01	1872	1	BR1	NA	1B	2			24	0	2	0
allisbi01	1872	1	BR1	NA	2B	1			1	4	2	0
allisbi01	1872	1	BR1	NA	OF	2			2	0	3	0
allisdo01	1872	1	TRO	NA	C	22			107	23	15	2	0
allisdo01	1872	1	TRO	NA	SS	1			1	2	0	0
allisdo01	1872	2	BR1	NA	C	18			64	8	14	0	0
ansonca01	1872	1	PH1	NA	3B	46			89	84	57	5
arnolbi01	1872	1	MID	NA	OF	2			1	0	0	0
barloto01	1872	1	BR2	NA	3B	1			0	0	0	0
barloto01	1872	1	BR2	NA	C	36			92	48	44	1	0
barloto01	1872	1	BR2	NA	SS	4			1	4	1	0
barnero01	1872	1	BS1	NA	2B	45			138	162	33	30
barre01	1872	1	BR2	NA	OF	8			21	0	5	0
barrebi01	1872	1	WS3	NA	C	1			2	0	3	0	0
bassjo01	1872	1	BR2	NA	OF	2			2	0	2	0
bealsto01	1872	1	WS3	NA	2B	5			11	18	5	2
bealsto01	1872	1	WS3	NA	OF	2			0	0	2	0
bealsto01	1872	1	WS3	NA	SS	2			3	8	4	0
beaveed01	1872	1	BR2	NA	2B	10			17	24	19	2
beaveed01	1872	1	BR2	NA	OF	1			0	0	1	0
beaveed01	1872	1	BR2	NA	SS	1			1	2	2	0
bechtge01	1872	1	NY2	NA	1B	1			6	0	3	0
bechtge01	1872	1	NY2	NA	OF	50			75	4	17	1
bellast01	1872	1	TRO	NA	3B	8			14	15	11	1
bellast01	1872	1	TRO	NA	OF	6			10	2	3	0
bellast01	1872	1	TRO	NA	SS	9			12	21	16	0
bentlcy01	1872	1	MID	NA	OF	7			12	1	1	1
bentlcy01	1872	1	MID	NA	P	18			8	42	9	2
besti01	1872	1	BR1	NA	C	4			14	3	5	0	0
bielaos01	1872	1	WS4	NA	OF	10			14	0	5	0
birdsda01	1872	1	BS1	NA	C	12			44	13	11	0	0
birdsda01	1872	1	BS1	NA	OF	8			5	0	1	0
boothed01	1872	1	MID	NA	2B	20			63	60	38	4
boothed01	1872	1	MID	NA	OF	4			5	1	0	0
boothed01	1872	2	BR2	NA	2B	1			2	5	1	1
boothed01	1872	2	BR2	NA	OF	14			16	3	5	0
boydbi01	1872	1	NY2	NA	3B	34			53	63	43	2
boydbi01	1872	1	NY2	NA	OF	1			2	0	0	0
brainas01	1872	1	WS3	NA	P	9			1	9	6	0
brainas01	1872	2	MID	NA	2B	4			7	8	7	0
brainas01	1872	2	MID	NA	OF	1			0	0	0	0
brainas01	1872	2	MID	NA	P	2			0	2	0	0
brittji01	1872	1	BR2	NA	P	37			13	53	17	1
brownol01	1872	1	BR2	NA	OF	4			8	0	1	0
burdoja01	1872	1	BR2	NA	2B	2			3	3	0	0
burdoja01	1872	1	BR2	NA	C	4			3	4	2	0	0
burdoja01	1872	1	BR2	NA	SS	36			49	114	58	2
burrohe01	1872	1	WS3	NA	OF	2			4	1	3	0
buttefr01	1872	1	MID	NA	3B	5			8	17	8	0
buttefr01	1872	1	MID	NA	OF	8			3	0	2	0
buttefr01	1872	1	MID	NA	P	7			1	3	1	0
careyto01	1872	1	BL1	NA	1B	1			5	0	1	0
careyto01	1872	1	BL1	NA	2B	29			79	44	28	3
careyto01	1872	1	BL1	NA	3B	3			4	2	4	0
careyto01	1872	1	BL1	NA	OF	3			4	0	3	0
careyto01	1872	1	BL1	NA	SS	9			11	19	12	0
carleji01	1872	1	CL1	NA	1B	7			61	4	3	4
clappjo01	1872	1	MID	NA	C	19			64	28	15	1	0
clappjo01	1872	1	MID	NA	OF	1			1	0	0	0
clappjo01	1872	1	MID	NA	SS	2			0	5	1	2
clarede01	1872	1	BR2	NA	2B	2			0	6	1	0
clarede01	1872	1	BR2	NA	SS	1			1	0	4	0
clintji01	1872	1	BR1	NA	2B	3			9	4	6	0
clintji01	1872	1	BR1	NA	3B	10			16	24	17	0
clintji01	1872	1	BR1	NA	C	2			3	0	2	0	0
clintji01	1872	1	BR1	NA	OF	11			18	1	5	0
clintji01	1872	1	BR1	NA	SS	2			2	6	5	0
coughde01	1872	1	WS4	NA	1B	1			2	0	1	0
coughde01	1872	1	WS4	NA	2B	1			0	4	2	0
coughde01	1872	1	WS4	NA	OF	5			15	1	1	1
coughde01	1872	1	WS4	NA	SS	1			2	3	3	0
cravebi01	1872	1	BL1	NA	2B	2			5	8	4	0
cravebi01	1872	1	BL1	NA	3B	2			2	2	5	0
cravebi01	1872	1	BL1	NA	C	27			166	26	28	4	0
cravebi01	1872	1	BL1	NA	OF	4			0	0	1	0
cummica01	1872	1	NY2	NA	OF	2			0	0	2	0
cummica01	1872	1	NY2	NA	P	55			20	61	9	3
cuthbne01	1872	1	PH1	NA	OF	47			95	2	16	0
dehlmhe01	1872	1	BR2	NA	1B	37			459	4	36	9
doschhe01	1872	1	BR2	NA	OF	6			9	1	3	0
doylejo01	1872	1	WS4	NA	2B	1			2	0	3	0
doylejo01	1872	1	WS4	NA	SS	8			14	22	18	0
eggleda01	1872	1	NY2	NA	OF	56			154	12	14	2
fergubo01	1872	1	BR2	NA	3B	37			84	178	62	7
fergubo01	1872	1	BR2	NA	C	1			0	0	0	0	0
fieldge01	1872	1	MID	NA	3B	12			17	10	21	0
fieldge01	1872	1	MID	NA	OF	5			3	0	0	0
fieldge01	1872	1	MID	NA	SS	1			1	2	1	0
fishech01	1872	1	BL1	NA	3B	18			45	29	33	2
fishech01	1872	1	BL1	NA	OF	19			14	1	4	1
fishech01	1872	1	BL1	NA	P	19			14	21	11	1
fislewe01	1872	1	PH1	NA	2B	47			117	140	32	13
fleetfr01	1872	1	BR1	NA	2B	2			6	8	3	0
fleetfr01	1872	1	BR1	NA	3B	10			26	31	18	1
fleetfr01	1872	1	BR1	NA	OF	2			1	0	0	0
fletcge01	1872	1	BR1	NA	OF	2			2	0	2	0
flowedi01	1872	1	PH1	NA	SS	3			1	8	5	0
flynncl01	1872	1	WS3	NA	1B	9			107	1	12	5
forceda01	1872	1	TRO	NA	3B	16			32	42	11	4
forceda01	1872	1	TRO	NA	SS	9			15	28	10	2
forceda01	1872	2	BL1	NA	3B	19			43	45	16	0
fulmech01	1872	1	NY2	NA	3B	22			39	43	27	2
fulmech01	1872	1	NY2	NA	SS	14			24	53	17	5
galvijo01	1872	1	BR2	NA	2B	1			1	0	4	0
gedneco01	1872	1	TRO	NA	OF	9			14	0	1	0
gedneco01	1872	2	BR1	NA	OF	18			51	0	5	0
glennjo01	1872	1	WS3	NA	OF	9			29	3	8	2
glennjo01	1872	2	WS4	NA	OF	1			2	0	1	0
goldswa01	1872	1	WS3	NA	2B	4			14	14	12	4
goldswa01	1872	1	WS3	NA	SS	5			6	13	9	1
gouldch01	1872	1	BS1	NA	1B	44			513	6	37	32
gouldch01	1872	1	BS1	NA	OF	2			3	0	0	0
hallge01	1872	1	BL1	NA	1B	1			4	0	0	1
hallge01	1872	1	BL1	NA	OF	52			88	4	18	2
hallji01	1872	1	BR2	NA	2B	13			35	34	23	5
hastisc01	1872	1	CL1	NA	2B	6			9	8	10	1
hastisc01	1872	1	CL1	NA	C	12			56	3	15	2	0
hastisc01	1872	1	CL1	NA	OF	8			15	1	2	0
hastisc01	1872	2	BL1	NA	2B	2			7	3	4	1
hastisc01	1872	2	BL1	NA	C	12			58	14	8	1	0
hastisc01	1872	2	BL1	NA	OF	1			0	0	0	0
hatfijo01	1872	1	NY2	NA	2B	56			160	162	58	25
heubege01	1872	1	WS3	NA	OF	5			8	0	2	0
hicksna01	1872	1	NY2	NA	C	54			294	34	47	3	0
hicksna01	1872	1	NY2	NA	OF	3			1	0	2	0
higby01	1872	1	BR2	NA	OF	1			2	0	1	0
highadi01	1872	1	BL1	NA	1B	1			9	0	3	0
highadi01	1872	1	BL1	NA	2B	5			10	6	7	0
highadi01	1872	1	BL1	NA	3B	2			2	2	6	0
highadi01	1872	1	BL1	NA	C	25			131	24	28	0	0
highadi01	1872	1	BL1	NA	OF	24			29	1	11	0
hinespa01	1872	1	WS4	NA	1B	9			74	1	12	0
hinespa01	1872	1	WS4	NA	3B	2			2	2	3	0
hinespa01	1872	1	WS4	NA	C	1			2	1	1	0	0
hodesch01	1872	1	TRO	NA	3B	1			3	1	1	0
hodesch01	1872	1	TRO	NA	C	3			9	6	3	0	0
hodesch01	1872	1	TRO	NA	OF	4			5	1	2	0
hodesch01	1872	1	TRO	NA	SS	5			2	20	7	0
holdsji01	1872	1	CL1	NA	SS	22			58	59	36	10
holdsji01	1872	2	BR1	NA	SS	2			5	9	1	0
holliho01	1872	1	WS4	NA	2B	9			31	18	14	2
huntdi01	1872	1	BR1	NA	2B	3			8	5	12	0
huntdi01	1872	1	BR1	NA	OF	8			5	2	4	0
hurledi01	1872	1	WS3	NA	OF	2			2	0	1	0
jackssa01	1872	1	BR2	NA	2B	1			0	0	1	0
jackssa01	1872	1	BR2	NA	3B	1			0	1	3	0
jackssa01	1872	1	BR2	NA	OF	3			5	1	3	0
jewetna01	1872	1	BR1	NA	C	2			6	1	3	0	0
kavan01	1872	1	BR1	NA	1B	4			35	0	3	0
kavan01	1872	1	BR1	NA	OF	2			1	0	1	0
kennejo01	1872	1	BR2	NA	2B	3			5	4	4	1
kennejo01	1872	1	BR2	NA	OF	3			4	0	4	0
kingma01	1872	1	TRO	NA	OF	3			6	0	1	0
kingst01	1872	1	TRO	NA	OF	25			54	5	17	1
lennobi01	1872	1	WS4	NA	1B	1			7	0	1	0
lennobi01	1872	1	WS4	NA	C	11			33	6	12	0	0
leonaan01	1872	1	BS1	NA	2B	4			8	12	1	2
leonaan01	1872	1	BS1	NA	3B	6			9	8	6	0
leonaan01	1872	1	BS1	NA	OF	38			41	7	10	0
leonaan01	1872	1	BS1	NA	SS	1			0	0	0	0
leutz01	1872	1	BR1	NA	C	4			11	0	4	0	0
lowech01	1872	1	BR2	NA	2B	7			22	19	9	1
mackde01	1872	1	PH1	NA	1B	26			280	11	16	8
mackde01	1872	1	PH1	NA	SS	21			22	56	25	0
malonfe01	1872	1	PH1	NA	1B	17			162	3	16	4
malonfe01	1872	1	PH1	NA	C	24			101	28	17	3	0
malonma01	1872	1	BR1	NA	OF	2			1	0	1	0
malonma01	1872	1	BR1	NA	P	3			1	3	4	0
martial01	1872	1	BR1	NA	2B	4			7	7	8	1
martiph01	1872	1	TRO	NA	OF	25			32	0	9	0
martiph01	1872	1	TRO	NA	P	8			2	3	2	0
martiph01	1872	2	BR1	NA	OF	9			11	2	4	0
martiph01	1872	2	BR1	NA	P	10			13	16	7	0
mathebo01	1872	1	BL1	NA	3B	3			1	3	6	0
mathebo01	1872	1	BL1	NA	OF	8			1	0	0	0
mathebo01	1872	1	BL1	NA	P	49			20	51	20	2
mcatebu01	1872	1	TRO	NA	1B	25			253	2	14	6
mcbridi01	1872	1	PH1	NA	P	47			34	83	24	3
mccarfr01	1872	1	MID	NA	OF	19			33	1	9	0
mcderjo01	1872	1	BR1	NA	P	7			1	8	5	0
mcdonja01	1872	1	BR2	NA	OF	15			18	0	7	0
mcdonja01	1872	2	BR1	NA	SS	1			0	2	4	0
mcgeami01	1872	1	PH1	NA	C	23			109	15	19	3	0
mcgeami01	1872	1	PH1	NA	OF	1			2	1	0	0
mcgeami01	1872	1	PH1	NA	SS	23			24	94	30	1
mcmuljo01	1872	1	NY2	NA	OF	53			146	3	22	0
mcmuljo01	1872	1	NY2	NA	P	3			1	4	0	0
mcveyca01	1872	1	BS1	NA	3B	1			0	2	0	0
mcveyca01	1872	1	BS1	NA	C	40			149	30	27	2	0
mcveyca01	1872	1	BS1	NA	OF	11			8	0	1	0
meyerle01	1872	1	PH1	NA	3B	1			3	2	0	1
meyerle01	1872	1	PH1	NA	OF	26			46	5	15	0
millejo01	1872	1	WS4	NA	1B	1			12	0	1	0
millsch01	1872	1	NY2	NA	C	3			9	2	4	1	0
millsch01	1872	1	NY2	NA	OF	4			6	0	3	0
millsev01	1872	1	BL1	NA	1B	55			464	6	35	17
minched01	1872	1	WS4	NA	OF	11			40	1	8	0
mulle01	1872	1	CL1	NA	OF	1			2	0	3	0
murnati01	1872	1	MID	NA	1B	24			309	0	41	6
nelsoca01	1872	1	TRO	NA	OF	3			7	0	0	0
nelsoca01	1872	1	TRO	NA	SS	1			1	2	2	0
nelsoca01	1872	2	BR1	NA	2B	9			17	28	10	0
nelsoca01	1872	2	BR1	NA	3B	3			4	5	1	0
nelsoca01	1872	2	BR1	NA	OF	8			19	0	6	0
orour01	1872	1	BR1	NA	P	1			0	0	1	0
orourji01	1872	1	MID	NA	3B	2			7	3	1	0
orourji01	1872	1	MID	NA	C	8			21	5	11	1	0
orourji01	1872	1	MID	NA	SS	16			16	54	26	1
paborch01	1872	1	CL1	NA	OF	20			43	1	7	1
paborch01	1872	1	CL1	NA	P	2			1	4	1	0
patteda01	1872	1	BR1	NA	1B	1			8	0	1	0
patteda01	1872	1	BR1	NA	OF	11			27	3	4	0
pearcdi01	1872	1	NY2	NA	OF	2			2	0	0	0
pearcdi01	1872	1	NY2	NA	SS	42			35	142	34	12
pikeli01	1872	1	BL1	NA	2B	24			55	49	27	7
pikeli01	1872	1	BL1	NA	3B	9			17	19	16	2
pikeli01	1872	1	BL1	NA	OF	25			35	0	5	0
prattal01	1872	1	CL1	NA	OF	6			1	0	0	0
prattal01	1872	1	CL1	NA	P	15			8	11	6	3
radcljo01	1872	1	BL1	NA	2B	1			1	1	0	0
radcljo01	1872	1	BL1	NA	3B	6			13	9	8	0
radcljo01	1872	1	BL1	NA	SS	50			66	156	66	9
reachal01	1872	1	PH1	NA	1B	4			51	0	2	3
reachal01	1872	1	PH1	NA	OF	20			29	4	2	2
reachbo01	1872	1	WS3	NA	SS	2			2	6	3	0
remseja01	1872	1	BR2	NA	OF	37			90	5	25	2
robinva01	1872	1	WS3	NA	OF	7			5	1	2	0
rogerfr01	1872	1	BS1	NA	1B	6			62	0	6	2
rogerfr01	1872	1	BS1	NA	OF	41			45	4	13	1
schafha01	1872	1	BS1	NA	3B	43			73	117	49	5
schafha01	1872	1	BS1	NA	C	2			2	0	2	0	0
schafha01	1872	1	BS1	NA	OF	5			7	1	1	0
selmafr01	1872	1	WS3	NA	3B	2			5	6	7	3
selmafr01	1872	1	WS3	NA	C	7			20	6	7	1	0
senseco01	1872	1	PH1	NA	OF	1			0	0	0	0
simmojo01	1872	1	CL1	NA	1B	15			133	3	9	11
simmojo01	1872	1	CL1	NA	OF	3			0	0	0	0
snydeji01	1872	1	BR1	NA	C	1			2	1	0	0	0
snydeji01	1872	1	BR1	NA	OF	1			1	0	0	0
snydeji01	1872	1	BR1	NA	SS	25			29	100	40	2
snydejo01	1872	1	BR1	NA	OF	9			25	3	8	0
spaldal01	1872	1	BS1	NA	OF	7			1	0	0	0
spaldal01	1872	1	BS1	NA	P	48			28	101	14	2
spenc01	1872	1	WS4	NA	SS	1			0	3	4	0
startjo01	1872	1	NY2	NA	1B	55			509	0	24	26
stearbi01	1872	1	WS4	NA	P	11			3	12	7	0
studlse01	1872	1	WS4	NA	OF	5			12	0	9	0
suttoez01	1872	1	CL1	NA	3B	22			47	42	35	2
swandma01	1872	1	BR1	NA	1B	1			13	1	0	0
swandma01	1872	1	BR1	NA	2B	1			3	1	0	0
swandma01	1872	1	BR1	NA	3B	8			16	14	18	0
swandma01	1872	1	BR1	NA	OF	4			13	0	8	0
sweasch01	1872	1	CL1	NA	2B	11			30	35	13	3
sweasch01	1872	1	CL1	NA	OF	1			5	0	0	0
thakeal01	1872	1	BR2	NA	2B	1			3	0	0	0
thakeal01	1872	1	BR2	NA	OF	18			41	1	10	0
tippeji01	1872	1	MID	NA	3B	5			5	15	9	1
tippeji01	1872	1	MID	NA	OF	19			32	3	10	0
treacfr01	1872	1	PH1	NA	OF	47			93	3	22	1
waterfr01	1872	1	WS3	NA	3B	7			15	28	8	3
waterfr01	1872	1	WS3	NA	C	2			3	1	2	0	0
whitede01	1872	1	CL1	NA	2B	7			16	22	9	4
whitede01	1872	1	CL1	NA	C	14			61	14	10	5	0
whitede01	1872	1	CL1	NA	OF	5			5	1	4	0
whitewa01	1872	1	WS4	NA	3B	9			27	35	10	2
whitewa01	1872	1	WS4	NA	SS	1			3	5	3	0
woltery01	1872	1	CL1	NA	OF	11			6	1	2	0
woltery01	1872	1	CL1	NA	P	12			1	8	9	1
woodji01	1872	1	TRO	NA	2B	25			83	57	18	4
woodji01	1872	2	BR1	NA	2B	7			23	19	8	1
worthhe01	1872	1	BR2	NA	OF	1			1	0	0	0
wrighge01	1872	1	BS1	NA	SS	48			87	193	54	25
wrighha01	1872	1	BS1	NA	OF	48			67	4	11	1
wrighha01	1872	1	BS1	NA	P	7			1	5	1	1
yeatmbi01	1872	1	WS4	NA	OF	1			0	0	1	0
yorkto01	1872	1	BL1	NA	OF	51			145	7	14	2
zettlge01	1872	1	TRO	NA	OF	8			5	0	1	0
zettlge01	1872	1	TRO	NA	P	25			8	34	10	0
zettlge01	1872	2	BR1	NA	OF	1			1	1	0	1
zettlge01	1872	2	BR1	NA	P	9			4	18	5	1
addybo01	1873	1	PH2	NA	2B	10			24	23	8	2
addybo01	1873	2	BS1	NA	OF	31			30	3	11	0
allisar01	1873	1	ELI	NA	1B	3			27	0	6	0
allisar01	1873	1	ELI	NA	C	1			5	1	1	0	0
allisar01	1873	1	ELI	NA	OF	21			37	2	7	1
allisdo01	1873	1	ELI	NA	C	18			47	17	15	3	0
allisdo01	1873	1	ELI	NA	OF	3			1	0	1	0
allisdo01	1873	2	NY2	NA	C	11			49	10	9	1	0
allisdo01	1873	2	NY2	NA	OF	1			0	0	0	0
ansonca01	1873	1	PH1	NA	1B	36			396	9	34	19
ansonca01	1873	1	PH1	NA	2B	3			4	5	7	1
ansonca01	1873	1	PH1	NA	3B	11			27	16	10	1
ansonca01	1873	1	PH1	NA	C	3			7	1	1	0	0
ansonca01	1873	1	PH1	NA	OF	3			6	1	1	0
atkined01	1873	1	WS5	NA	OF	2			1	0	0	0
austihe01	1873	1	ELI	NA	OF	23			35	4	15	1
barloto01	1873	1	BR2	NA	2B	1			0	0	0	0
barloto01	1873	1	BR2	NA	C	55			157	58	67	2	0
barloto01	1873	1	BR2	NA	SS	1			1	2	1	0
barnero01	1873	1	BS1	NA	2B	47			167	168	58	22
barnero01	1873	1	BS1	NA	3B	13			31	29	16	4
barrebi01	1873	1	BL1	NA	OF	1			0	0	0	0
barrebi01	1873	1	BL1	NA	SS	1			3	1	2	0
battijo01	1873	1	PH1	NA	OF	1			1	1	1	0
bealsto01	1873	1	WS5	NA	2B	26			101	81	27	16
bealsto01	1873	1	WS5	NA	C	13			26	12	9	1	0
bealsto01	1873	1	WS5	NA	OF	1			1	0	0	0
bechtge01	1873	1	PH2	NA	OF	52			84	9	16	2
bechtge01	1873	1	PH2	NA	P	3			1	3	2	0
bellast01	1873	1	NY2	NA	2B	3			0	1	0	0
bellast01	1873	1	NY2	NA	3B	7			13	8	22	3
bielaos01	1873	1	WS5	NA	OF	38			64	7	21	0
birdsda01	1873	1	BS1	NA	OF	3			1	0	4	0
boothed01	1873	1	ELI	NA	2B	1			2	4	3	0
boothed01	1873	1	ELI	NA	OF	17			27	1	5	0
boothed01	1873	2	BR2	NA	OF	16			23	3	7	0
boydbi01	1873	1	BR2	NA	3B	8			13	18	7	1
boydbi01	1873	1	BR2	NA	OF	43			38	10	19	1
brainas01	1873	1	BL1	NA	2B	1			0	2	1	0
brainas01	1873	1	BL1	NA	OF	2			0	0	0	0
brainas01	1873	1	BL1	NA	P	14			2	14	4	0
brittji01	1873	1	BR2	NA	OF	3			3	0	0	0
brittji01	1873	1	BR2	NA	P	54			12	71	31	0
burdoja01	1873	1	BR2	NA	2B	55			170	166	76	21
burdoja01	1873	1	BR2	NA	C	2			0	0	0	0	0
campbhu01	1873	1	ELI	NA	2B	1			2	4	1	0
campbhu01	1873	1	ELI	NA	OF	1			0	0	0	0
campbhu01	1873	1	ELI	NA	P	19			6	41	20	0
campbhu01	1873	1	ELI	NA	SS	1			0	2	0	0
campbmi02	1873	1	ELI	NA	1B	18			225	2	18	5
campbmi02	1873	1	ELI	NA	OF	1			4	0	0	0
campbmi02	1873	1	ELI	NA	SS	3			8	8	6	0
careyto01	1873	1	BL1	NA	2B	54			134	134	49	22
careyto01	1873	1	BL1	NA	3B	4			1	5	4	0
careyto01	1873	1	BL1	NA	SS	3			2	13	2	0
clappjo01	1873	1	PH1	NA	2B	1			0	2	2	0
clappjo01	1873	1	PH1	NA	C	43			182	34	22	2	0
clappjo01	1873	1	PH1	NA	OF	1			0	0	0	0
clappjo01	1873	1	PH1	NA	SS	6			1	15	7	0
clintji01	1873	1	ELI	NA	3B	9			25	21	20	1
cranefr01	1873	1	ELI	NA	2B	1			2	2	2	0
cravebi01	1873	1	BL1	NA	1B	3			17	0	0	1
cravebi01	1873	1	BL1	NA	C	22			78	21	9	2	0
cravebi01	1873	1	BL1	NA	OF	7			10	0	0	0
cravebi01	1873	1	BL1	NA	SS	15			24	45	20	5
cummica01	1873	1	BL1	NA	P	42			20	41	16	2
cuthbne01	1873	1	PH2	NA	OF	51			110	2	20	1
dehlmhe01	1873	1	BR2	NA	1B	54			682	9	53	21
dehlmhe01	1873	1	BR2	NA	SS	1			0	1	0	0
devliji01	1873	1	PH2	NA	1B	12			118	4	8	9
devliji01	1873	1	PH2	NA	3B	6			8	11	12	1
devliji01	1873	1	PH2	NA	OF	1			1	1	0	0
devliji01	1873	1	PH2	NA	SS	5			4	6	6	0
donnejo01	1873	1	WS5	NA	2B	12			36	36	10	1
donnejo01	1873	1	WS5	NA	3B	1			0	0	0	0
donnejo01	1873	1	WS5	NA	OF	6			13	1	4	0
donnejo01	1873	1	WS5	NA	SS	13			16	38	15	4
doschhe01	1873	1	BR2	NA	OF	1			1	0	1	0
eggleda01	1873	1	NY2	NA	3B	1			0	0	1	0
eggleda01	1873	1	NY2	NA	OF	53			119	6	20	1
eland01	1873	1	BL4	NA	OF	1			2	0	1	0
farrojo01	1873	1	ELI	NA	1B	1			6	0	2	0
farrojo01	1873	1	ELI	NA	C	9			26	9	17	0	0
farrojo01	1873	1	ELI	NA	OF	3			2	0	0	0
farrojo01	1873	1	ELI	NA	SS	1			0	2	2	0
fergubo01	1873	1	BR2	NA	3B	50			109	211	104	9
fergubo01	1873	1	BR2	NA	P	4			0	4	1	0
fishech01	1873	1	PH1	NA	1B	1			9	1	1	2
fishech01	1873	1	PH1	NA	2B	3			3	4	3	0
fishech01	1873	1	PH1	NA	OF	45			72	12	29	3
fishech01	1873	1	PH1	NA	P	13			8	8	4	0
fislewe01	1873	1	PH1	NA	1B	10			72	2	13	3
fislewe01	1873	1	PH1	NA	2B	36			99	113	36	19
fleetfr01	1873	1	ELI	NA	1B	1			11	0	0	0
fleetfr01	1873	1	ELI	NA	2B	9			26	25	8	1
fleetfr01	1873	1	ELI	NA	3B	2			6	8	4	0
fleetfr01	1873	1	ELI	NA	P	3			4	7	0	0
fleetfr01	1873	1	ELI	NA	SS	9			10	32	14	1
forceda01	1873	1	BL1	NA	3B	34			59	73	29	1
forceda01	1873	1	BL1	NA	P	3			0	1	0	0
forceda01	1873	1	BL1	NA	SS	17			32	61	18	5
frencbi01	1873	1	BL4	NA	1B	2			19	0	2	0
frencbi01	1873	1	BL4	NA	3B	1			1	1	1	0
frencbi01	1873	1	BL4	NA	OF	2			2	1	2	0
frencbi01	1873	1	BL4	NA	P	1			0	0	0	0
fulmech01	1873	1	PH2	NA	1B	1			5	0	1	0
fulmech01	1873	1	PH2	NA	C	1			0	0	0	0	0
fulmech01	1873	1	PH2	NA	P	2			1	1	1	0
fulmech01	1873	1	PH2	NA	SS	49			81	220	75	15
gedneco01	1873	1	NY2	NA	OF	53			185	10	30	4
gerhajo01	1873	1	WS5	NA	SS	13			9	40	21	4
glennjo01	1873	1	WS5	NA	1B	39			384	4	30	20
goldswa01	1873	1	BL4	NA	2B	1			1	3	2	0
greasjo01	1873	1	WS5	NA	P	7			5	6	5	1
hallge01	1873	1	BL1	NA	OF	35			87	2	17	0
hastisc01	1873	1	BL1	NA	2B	1			1	1	1	0
hastisc01	1873	1	BL1	NA	C	19			81	10	11	2	0
hastisc01	1873	1	BL1	NA	OF	12			18	0	2	0
hatfijo01	1873	1	NY2	NA	2B	11			29	20	11	1
hatfijo01	1873	1	NY2	NA	3B	45			105	84	65	5
hatfijo01	1873	1	NY2	NA	OF	1			0	0	0	0
hicksna01	1873	1	NY2	NA	C	28			170	23	52	4	0
highadi01	1873	1	NY2	NA	2B	18			35	25	22	8
highadi01	1873	1	NY2	NA	C	17			100	17	22	1	0
highadi01	1873	1	NY2	NA	OF	19			15	0	6	0
hinespa01	1873	1	WS5	NA	2B	2			8	11	3	3
hinespa01	1873	1	WS5	NA	C	1			2	0	1	0	0
hinespa01	1873	1	WS5	NA	OF	36			83	4	22	0
holdsji01	1873	1	NY2	NA	SS	53			78	146	65	10
holliho01	1873	1	WS5	NA	2B	2			2	4	1	1
holliho01	1873	1	WS5	NA	OF	30			65	5	14	0
hoopemi01	1873	1	BL4	NA	C	1			3	1	3	0	0
hoopemi01	1873	1	BL4	NA	OF	2			5	0	1	0
johnsto01	1873	1	BL4	NA	OF	1			0	0	1	0
jones01	1873	1	BL4	NA	OF	1			4	0	1	0
kernajo01	1873	1	BL4	NA	2B	1			3	4	3	0
kernajo01	1873	1	BL4	NA	OF	1			4	0	0	0
kesslhe01	1873	1	BR2	NA	1B	1			14	1	2	0
kohlehe01	1873	1	BL4	NA	1B	1			4	0	0	0
kohlehe01	1873	1	BL4	NA	3B	6			18	6	11	0
kohlehe01	1873	1	BL4	NA	C	1			2	0	2	0	0
kohlehe01	1873	1	BL4	NA	OF	1			0	0	0	0
laughbe01	1873	1	ELI	NA	2B	12			36	38	28	6
lennobi01	1873	1	BL4	NA	1B	4			49	0	3	0
lennobi01	1873	1	BL4	NA	3B	1			2	1	1	0
lennobi01	1873	1	BL4	NA	C	1			3	0	2	0	0
leonaan01	1873	1	BS1	NA	1B	2			2	0	2	0
leonaan01	1873	1	BS1	NA	2B	12			30	31	11	6
leonaan01	1873	1	BS1	NA	OF	45			79	16	38	1
leonaan01	1873	1	BS1	NA	SS	1			1	6	1	0
lovetle01	1873	1	ELI	NA	P	1			0	1	1	0
mackde01	1873	1	PH2	NA	1B	42			429	8	30	20
mackde01	1873	1	PH2	NA	2B	1			6	2	0	0
mackde01	1873	1	PH2	NA	OF	4			3	1	1	0
mackde01	1873	1	PH2	NA	SS	3			2	12	2	0
malonfe01	1873	1	PH2	NA	C	53			198	48	28	7	0
malonfe01	1873	1	PH2	NA	SS	1			1	0	2	0
mannija01	1873	1	BS1	NA	1B	29			306	10	20	14
mannija01	1873	1	BS1	NA	OF	5			7	0	4	0
martiph01	1873	1	NY2	NA	OF	30			17	0	8	0
martiph01	1873	1	NY2	NA	P	6			0	3	7	0
mathebo01	1873	1	NY2	NA	OF	5			2	0	1	0
mathebo01	1873	1	NY2	NA	P	52			27	58	27	1
mcbridi01	1873	1	PH1	NA	OF	11			4	0	5	0
mcbridi01	1873	1	PH1	NA	P	46			22	60	15	2
mcdoo01	1873	1	BL4	NA	P	1			0	4	1	0
mcgeami01	1873	1	PH1	NA	3B	1			0	0	0	0
mcgeami01	1873	1	PH1	NA	C	13			34	8	11	0	0
mcgeami01	1873	1	PH1	NA	SS	44			60	147	50	9
mcmuljo01	1873	1	PH1	NA	OF	51			117	3	25	1
mcmuljo01	1873	1	PH1	NA	P	1			0	3	1	0
mcveyca01	1873	1	BL1	NA	1B	3			13	0	2	2
mcveyca01	1873	1	BL1	NA	2B	4			12	5	6	0
mcveyca01	1873	1	BL1	NA	3B	2			4	1	5	0
mcveyca01	1873	1	BL1	NA	C	25			82	15	10	0	0
mcveyca01	1873	1	BL1	NA	OF	6			13	0	2	0
mcveyca01	1873	1	BL1	NA	SS	5			11	18	4	0
meyerle01	1873	1	PH2	NA	3B	48			86	108	67	7
meyerle01	1873	1	PH2	NA	SS	1			0	0	0	0
millsev01	1873	1	BL1	NA	1B	53			515	8	28	14
millsev01	1873	1	BL1	NA	OF	1			2	0	0	0
murnati01	1873	1	PH1	NA	1B	10			81	4	12	1
murnati01	1873	1	PH1	NA	2B	6			12	9	5	0
murnati01	1873	1	PH1	NA	OF	30			49	2	13	0
nelsoca01	1873	1	NY2	NA	1B	1			2	0	0	0
nelsoca01	1873	1	NY2	NA	2B	27			59	54	17	4
nelsoca01	1873	1	NY2	NA	3B	5			6	11	7	1
nelsoca01	1873	1	NY2	NA	C	1			2	1	0	0	0
nelsoca01	1873	1	NY2	NA	OF	6			4	0	1	0
nevinal01	1873	1	ELI	NA	3B	12			11	22	24	0
nevinal01	1873	1	ELI	NA	OF	1			1	0	0	0
orourji01	1873	1	BS1	NA	1B	32			350	11	33	18
orourji01	1873	1	BS1	NA	C	9			27	4	4	2	0
orourji01	1873	1	BS1	NA	OF	22			19	4	11	0
paborch01	1873	1	BR2	NA	OF	55			138	4	34	1
pearcdi01	1873	1	BR2	NA	1B	1			1	0	0	0
pearcdi01	1873	1	BR2	NA	2B	1			0	0	1	0
pearcdi01	1873	1	BR2	NA	SS	55			36	233	76	10
phelpne01	1873	1	NY2	NA	1B	1			1	0	0	0
phelpne01	1873	1	NY2	NA	OF	1			0	0	0	0
pikeli01	1873	1	BL1	NA	2B	2			6	0	1	0
pikeli01	1873	1	BL1	NA	OF	56			47	10	24	5
popplge01	1873	1	BL4	NA	OF	1			1	0	0	0
popplge01	1873	1	BL4	NA	SS	1			0	1	1	0
radcljo01	1873	1	BL1	NA	2B	1			1	2	0	0
radcljo01	1873	1	BL1	NA	3B	24			36	79	36	2
radcljo01	1873	1	BL1	NA	SS	23			35	56	35	3
reachal01	1873	1	PH1	NA	2B	9			12	25	5	2
reachal01	1873	1	PH1	NA	OF	7			17	3	1	0
reachbo01	1873	1	WS5	NA	SS	1			1	3	4	0
remseja01	1873	1	BR2	NA	OF	50			102	5	25	2
rogerfr01	1873	1	BS1	NA	1B	1			13	0	3	1
ryanjo01	1873	1	PH2	NA	1B	1			7	1	2	1
ryanjo01	1873	1	PH2	NA	OF	1			2	0	0	0
saylo01	1873	1	BL4	NA	OF	1			4	0	0	0
saylo01	1873	1	BL4	NA	SS	2			3	7	5	0
schafha01	1873	1	BS1	NA	3B	47			90	79	62	7
schafha01	1873	1	BS1	NA	OF	13			28	2	8	1
selmafr01	1873	1	BL4	NA	P	1			0	0	1	0
senseco01	1873	1	PH1	NA	1B	1			0	0	0	0
senseco01	1873	1	PH1	NA	OF	19			42	1	9	0
sheppjo01	1873	1	BL4	NA	C	1			2	1	2	0	0
sheppjo01	1873	1	BL4	NA	OF	2			3	0	3	0
simpsma01	1873	1	BL4	NA	2B	3			4	15	5	0
simpsma01	1873	1	BL4	NA	C	1			3	2	2	0	0
smithbi01	1873	1	BL4	NA	2B	1			2	3	3	0
smithbi01	1873	1	BL4	NA	C	2			6	2	2	0	0
smithbi01	1873	1	BL4	NA	OF	3			3	0	3	0
smithjo01	1873	1	BL4	NA	OF	2			1	0	1	0
smithjo01	1873	1	BL4	NA	SS	3			7	10	5	0
snydepo01	1873	1	WS5	NA	C	28			96	44	25	3	0
snydepo01	1873	1	WS5	NA	OF	3			1	0	0	0
spaldal01	1873	1	BS1	NA	OF	13			1	0	1	0
spaldal01	1873	1	BS1	NA	P	60			40	131	29	2
startjo01	1873	1	NY2	NA	1B	53			413	18	26	19
startjo01	1873	1	NY2	NA	OF	2			0	0	0	0
stearbi01	1873	1	WS5	NA	P	32			17	27	16	1
strated01	1873	1	BL4	NA	OF	1			0	0	0	0
strated01	1873	1	BL4	NA	P	3			0	3	3	0
suttoez01	1873	1	PH1	NA	2B	2			1	2	3	0
suttoez01	1873	1	PH1	NA	3B	43			74	113	45	3
suttoez01	1873	1	PH1	NA	SS	8			13	18	12	2
swandma01	1873	1	ELI	NA	1B	2			20	0	2	0
sweasch01	1873	1	BS1	NA	2B	1			1	4	2	0
treacfr01	1873	1	PH2	NA	OF	51			108	10	35	4
wallho01	1873	1	WS5	NA	SS	1			0	0	0	0
waterfr01	1873	1	WS5	NA	3B	2			3	2	2	0
waterfr01	1873	1	WS5	NA	OF	4			3	2	3	0
waterfr01	1873	1	WS5	NA	SS	9			13	24	23	0
whitede01	1873	1	BS1	NA	C	56			229	44	50	4	0
whitede01	1873	1	BS1	NA	OF	9			4	1	2	0
whitewa01	1873	1	WS5	NA	3B	37			85	108	76	9
whitewa01	1873	1	WS5	NA	SS	3			3	9	2	0
woltery01	1873	1	ELI	NA	P	1			0	2	0	0
woodhre01	1873	1	BL4	NA	SS	1			1	8	1	0
woodji01	1873	1	PH2	NA	2B	42			141	115	45	27
wordsfa01	1873	1	ELI	NA	OF	1			1	0	0	0
wordsfa01	1873	1	ELI	NA	SS	11			8	37	25	1
wrighge01	1873	1	BS1	NA	SS	59			89	244	79	16
wrighha01	1873	1	BS1	NA	OF	58			61	11	14	1
wrighha01	1873	1	BS1	NA	P	13			2	3	2	1
yorkto01	1873	1	BL1	NA	OF	57			180	10	28	1
zettlge01	1873	1	PH2	NA	1B	1			1	0	0	0
zettlge01	1873	1	PH2	NA	P	51			22	93	18	4
addybo01	1874	1	HR1	NA	2B	45			125	139	48	7
addybo01	1874	1	HR1	NA	3B	5			10	10	15	0
addybo01	1874	1	HR1	NA	SS	1			0	1	2	0
allisdo01	1874	1	NY2	NA	2B	1			1	0	1	0
allisdo01	1874	1	NY2	NA	C	34			161	25	40	2	0
allisdo01	1874	1	NY2	NA	OF	47			28	4	8	0
ansonca01	1874	1	PH1	NA	1B	24			229	5	16	9
ansonca01	1874	1	PH1	NA	3B	20			38	33	21	2
ansonca01	1874	1	PH1	NA	C	1			0	0	0	0	0
ansonca01	1874	1	PH1	NA	OF	8			11	1	4	0
ansonca01	1874	1	PH1	NA	SS	6			5	18	8	0
barloto01	1874	1	HR1	NA	SS	32			65	126	42	4
barnero01	1874	1	BS1	NA	2B	51			160	167	55	31
barnero01	1874	1	BS1	NA	OF	1			1	0	2	0
barnibi01	1874	1	HR1	NA	C	30			111	18	47	0	0
barnibi01	1874	1	HR1	NA	OF	29			26	5	19	2
barnibi01	1874	1	HR1	NA	SS	1			0	0	2	0
battijo01	1874	1	PH1	NA	2B	41			111	124	54	20
battijo01	1874	1	PH1	NA	OF	7			13	1	6	0
battijo01	1874	1	PH1	NA	SS	5			10	11	9	0
bealsto01	1874	1	BS1	NA	2B	12			29	33	11	2
bealsto01	1874	1	BS1	NA	OF	9			6	2	4	0
bechtge01	1874	1	PH2	NA	OF	28			38	0	14	0
bechtge01	1874	1	PH2	NA	P	6			2	6	9	0
bielaos01	1874	1	BL1	NA	1B	1			3	0	1	0
bielaos01	1874	1	BL1	NA	OF	43			65	10	18	1
boardfr01	1874	1	BL1	NA	OF	1			0	0	0	0
bondto01	1874	1	BR2	NA	P	55			27	137	31	1
boothed01	1874	1	BR2	NA	2B	1			1	0	0	0
boothed01	1874	1	BR2	NA	OF	44			69	3	17	0
boydbi01	1874	1	HR1	NA	3B	25			43	44	44	6
boydbi01	1874	1	HR1	NA	OF	1			2	0	0	0
bradyst01	1874	1	HR1	NA	3B	16			28	19	24	0
bradyst01	1874	1	HR1	NA	OF	11			16	2	10	0
bradyst01	1874	1	HR1	NA	SS	1			0	0	1	0
brainas01	1874	1	BL1	NA	2B	21			24	41	22	1
brainas01	1874	1	BL1	NA	OF	2			1	0	0	0
brainas01	1874	1	BL1	NA	P	30			8	33	9	2
brown01	1874	1	BL1	NA	SS	2			3	5	3	0
burdoja01	1874	1	NY2	NA	3B	60			160	131	64	7
burdoja01	1874	1	NY2	NA	OF	3			3	0	0	0
careyto01	1874	1	NY2	NA	2B	13			30	34	18	2
careyto01	1874	1	NY2	NA	SS	51			40	133	50	5
carlle01	1874	1	BL1	NA	C	1			1	0	3	0	0
chapmja01	1874	1	BR2	NA	1B	1			10	0	0	0
chapmja01	1874	1	BR2	NA	OF	53			51	12	22	0
clackbo01	1874	1	BR2	NA	1B	2			29	1	3	1
clackbo01	1874	1	BR2	NA	OF	31			55	5	17	0
clappjo01	1874	1	PH1	NA	C	27			126	23	24	3	0
clappjo01	1874	1	PH1	NA	OF	15			19	1	10	1
clappjo01	1874	1	PH1	NA	SS	1			0	1	0	0
clintji01	1874	1	BR2	NA	2B	1			2	2	5	0
clintji01	1874	1	BR2	NA	OF	1			0	0	0	0
collida01	1874	1	CH2	NA	OF	2			3	0	0	0
collida01	1874	1	CH2	NA	P	2			0	5	0	0
collida01	1874	1	CH2	NA	SS	1			1	0	1	0
connete01	1874	1	CH2	NA	C	1			2	1	4	0	0
cravebi01	1874	1	PH2	NA	1B	1			1	1	0	0
cravebi01	1874	1	PH2	NA	2B	54			175	138	75	27
cravebi01	1874	1	PH2	NA	C	5			12	4	8	0	0
cummica01	1874	1	PH2	NA	OF	1			0	0	0	0
cummica01	1874	1	PH2	NA	P	54			16	73	23	0
cuthbne01	1874	1	CH2	NA	C	4			15	2	6	0	0
cuthbne01	1874	1	CH2	NA	OF	55			135	10	35	1
deaneha01	1874	1	BL1	NA	2B	2			3	4	2	0
deaneha01	1874	1	BL1	NA	OF	46			75	6	18	2
deaneha01	1874	1	BL1	NA	SS	1			0	1	1	0
dehlmhe01	1874	1	BR2	NA	1B	53			701	9	42	8
devliji01	1874	1	CH2	NA	1B	24			248	3	19	5
devliji01	1874	1	CH2	NA	3B	5			5	6	9	0
devliji01	1874	1	CH2	NA	OF	17			20	2	7	2
donnejo01	1874	1	PH2	NA	2B	1			1	1	1	0
donnejo01	1874	1	PH2	NA	OF	3			2	0	1	0
donnejo01	1874	1	PH2	NA	SS	2			1	3	3	0
eggleda01	1874	1	PH2	NA	2B	2			5	3	1	0
eggleda01	1874	1	PH2	NA	OF	57			135	9	15	3
farreja01	1874	1	HR1	NA	OF	3			6	0	0	0
farrojo01	1874	1	BR2	NA	2B	12			34	45	23	5
farrojo01	1874	1	BR2	NA	C	16			40	19	26	1	0
farrojo01	1874	1	BR2	NA	OF	3			0	2	0	0
fergubo01	1874	1	BR2	NA	3B	55			79	158	75	1
fergubo01	1874	1	BR2	NA	C	2			8	1	4	0	0
fergubo01	1874	1	BR2	NA	P	1			0	3	1	1
fishech01	1874	1	HR1	NA	3B	7			12	12	16	0
fishech01	1874	1	HR1	NA	OF	12			9	4	2	0
fishech01	1874	1	HR1	NA	P	39			29	46	15	2
fishech01	1874	1	HR1	NA	SS	2			1	1	1	0
fislewe01	1874	1	PH1	NA	1B	28			271	10	14	17
fislewe01	1874	1	PH1	NA	2B	9			12	29	6	2
fislewe01	1874	1	PH1	NA	OF	1			0	0	0	0
fleetfr01	1874	1	BR2	NA	2B	11			31	26	21	0
fleetfr01	1874	1	BR2	NA	C	13			54	9	20	1	0
fleetfr01	1874	1	BR2	NA	OF	1			0	0	0	0
forceda01	1874	1	CH2	NA	3B	42			93	113	51	6
forceda01	1874	1	CH2	NA	P	1			0	2	1	0
forceda01	1874	1	CH2	NA	SS	18			23	66	16	2
fulmech01	1874	1	PH2	NA	3B	25			48	61	40	3
fulmech01	1874	1	PH2	NA	SS	32			50	119	44	8
gaver01	1874	1	BR2	NA	2B	1			1	8	3	0
gedneco01	1874	1	PH1	NA	1B	4			43	1	6	1
gedneco01	1874	1	PH1	NA	OF	51			126	3	28	2
geerbi01	1874	1	NY2	NA	OF	2			6	2	1	1
gerhajo01	1874	1	BL1	NA	SS	14			7	59	22	3
gilro01	1874	1	CH2	NA	C	8			25	6	7	0	0
glennjo01	1874	1	CH2	NA	1B	37			328	9	30	10
glennjo01	1874	1	CH2	NA	OF	19			38	2	13	1
gouldch01	1874	1	BL1	NA	1B	32			344	4	18	11
gouldch01	1874	1	BL1	NA	C	1			4	2	1	0	0
hallge01	1874	1	BS1	NA	OF	47			85	5	21	2
hallji01	1874	1	BR2	NA	2B	2			4	2	1	0
hallji01	1874	1	BR2	NA	OF	1			2	0	0	0
hastisc01	1874	1	HR1	NA	2B	1			4	2	2	0
hastisc01	1874	1	HR1	NA	C	39			117	29	48	4	0
hastisc01	1874	1	HR1	NA	OF	26			23	2	9	0
hastisc01	1874	1	HR1	NA	SS	1			1	1	1	0
hatfijo01	1874	1	NY2	NA	1B	1			3	0	2	0
hatfijo01	1874	1	NY2	NA	3B	7			16	13	7	2
hatfijo01	1874	1	NY2	NA	OF	58			171	3	25	0
hatfijo01	1874	1	NY2	NA	P	3			2	5	0	1
hatfijo01	1874	1	NY2	NA	SS	1			0	1	1	0
hicksna01	1874	1	PH2	NA	2B	1			0	0	0	0
hicksna01	1874	1	PH2	NA	C	57			261	59	69	4	0
hicksna01	1874	1	PH2	NA	OF	4			3	0	0	0
highadi01	1874	1	NY2	NA	2B	1			2	0	1	0
highadi01	1874	1	NY2	NA	C	48			248	45	51	4	0
highadi01	1874	1	NY2	NA	OF	33			13	2	18	0
hinespa01	1874	1	CH2	NA	2B	11			28	24	15	2
hinespa01	1874	1	CH2	NA	OF	50			137	5	20	2
hinespa01	1874	1	CH2	NA	SS	2			2	4	5	0
hodesch01	1874	1	BR2	NA	1B	1			0	0	1	0
hodesch01	1874	1	BR2	NA	2B	3			7	5	5	0
hodesch01	1874	1	BR2	NA	C	3			2	1	4	0	0
hodesch01	1874	1	BR2	NA	OF	18			32	1	7	0
holdsji01	1874	1	PH2	NA	1B	1			10	0	5	1
holdsji01	1874	1	PH2	NA	2B	2			1	2	1	0
holdsji01	1874	1	PH2	NA	3B	31			58	42	44	5
holdsji01	1874	1	PH2	NA	OF	6			3	0	3	0
holdsji01	1874	1	PH2	NA	SS	21			26	59	45	5
jones01	1874	1	BL1	NA	C	1			6	1	1	0	0
jones01	1874	1	BL1	NA	OF	1			0	0	0	0
kesslhe01	1874	1	BR2	NA	2B	4			12	5	10	0
kesslhe01	1874	1	BR2	NA	3B	1			0	2	1	2
kesslhe01	1874	1	BR2	NA	C	9			36	6	15	0	0
kesslhe01	1874	1	BR2	NA	OF	4			4	0	3	0
knowdja01	1874	1	BR2	NA	C	21			73	16	19	1	0
knowdja01	1874	1	BR2	NA	OF	4			4	0	2	0
kohlehe01	1874	1	BL1	NA	1B	1			14	1	6	0
ledwimi01	1874	1	BR2	NA	C	1			3	0	2	0	0
leonaan01	1874	1	BS1	NA	2B	11			24	28	9	4
leonaan01	1874	1	BS1	NA	OF	51			90	6	23	1
leonaan01	1874	1	BS1	NA	SS	11			15	40	12	8
mackde01	1874	1	PH2	NA	1B	56			488	8	55	31
malonfe01	1874	1	CH2	NA	C	47			193	58	55	2	0
mannija01	1874	1	BL1	NA	1B	1			7	0	0	0
mannija01	1874	1	BL1	NA	2B	22			52	44	25	8
mannija01	1874	1	BL1	NA	3B	1			4	2	2	0
mannija01	1874	1	BL1	NA	P	22			11	36	9	0
mannija01	1874	1	BL1	NA	SS	4			4	8	6	1
mannija01	1874	2	HR1	NA	3B	1			0	1	5	0
martial01	1874	1	BR2	NA	2B	6			15	16	17	1
martial01	1874	1	BR2	NA	OF	1			1	0	2	0
mathebo01	1874	1	NY2	NA	3B	1			1	1	0	1
mathebo01	1874	1	NY2	NA	OF	1			0	0	0	0
mathebo01	1874	1	NY2	NA	P	65			29	101	38	2
mcbridi01	1874	1	PH1	NA	P	55			21	61	17	1
mcgeami01	1874	1	PH1	NA	C	28			119	20	27	0	0
mcgeami01	1874	1	PH1	NA	OF	4			1	0	2	0
mcgeami01	1874	1	PH1	NA	SS	26			37	96	27	10
mcgeepa01	1874	1	BR2	NA	2B	1			1	5	2	1
mcgeepa01	1874	1	BR2	NA	OF	15			30	1	8	0
mcgeepa01	1874	1	BR2	NA	SS	2			2	2	3	0
mckenfr01	1874	1	PH2	NA	1B	1			13	0	0	0
mcmuljo01	1874	1	PH1	NA	OF	55			103	5	32	1
mcveyca01	1874	1	BS1	NA	C	23			66	9	12	0	0
mcveyca01	1874	1	BS1	NA	OF	57			64	7	29	0
meyerle01	1874	1	CH2	NA	2B	31			100	65	33	11
meyerle01	1874	1	CH2	NA	3B	14			28	25	26	2
meyerle01	1874	1	CH2	NA	OF	5			4	0	4	0
meyerle01	1874	1	CH2	NA	SS	5			2	11	9	0
milleto01	1874	1	PH1	NA	C	4			21	2	6	0	0
milleto01	1874	1	PH1	NA	OF	1			0	0	0	0
millsev01	1874	1	HR1	NA	1B	53			522	9	46	12
murnati01	1874	1	PH1	NA	1B	3			15	0	2	1
murnati01	1874	1	PH1	NA	2B	6			6	9	12	2
murnati01	1874	1	PH1	NA	OF	14			16	2	3	0
nelsoca01	1874	1	NY2	NA	2B	51			115	105	47	8
nelsoca01	1874	1	NY2	NA	OF	1			1	1	1	0
nelsoca01	1874	1	NY2	NA	SS	14			17	37	16	3
oneal01	1874	1	HR1	NA	OF	1			0	2	1	0
orourji01	1874	1	BS1	NA	1B	70			755	12	46	40
paborch01	1874	1	PH2	NA	OF	17			16	5	17	1
patteda01	1874	1	NY2	NA	1B	1			4	0	0	0
patteda01	1874	1	NY2	NA	OF	1			0	0	0	0
pearcdi01	1874	1	BR2	NA	2B	1			0	0	0	0
pearcdi01	1874	1	BR2	NA	3B	2			1	1	2	0
pearcdi01	1874	1	BR2	NA	SS	56			63	204	49	7
peterjo01	1874	1	CH2	NA	2B	19			61	61	24	3
peterjo01	1874	1	CH2	NA	SS	36			33	122	39	5
phelpne01	1874	1	NY2	NA	OF	6			7	2	2	1
pikeli01	1874	1	HR1	NA	2B	7			24	23	15	1
pikeli01	1874	1	HR1	NA	3B	1			1	0	0	0
pikeli01	1874	1	HR1	NA	OF	27			70	7	13	1
pikeli01	1874	1	HR1	NA	SS	20			38	72	31	0
quinl01	1874	1	PH2	NA	SS	1			0	3	0	0
radcljo01	1874	1	PH2	NA	1B	2			7	0	0	0
radcljo01	1874	1	PH2	NA	2B	4			13	6	5	2
radcljo01	1874	1	PH2	NA	3B	3			1	5	4	0
radcljo01	1874	1	PH2	NA	OF	15			15	1	4	0
radcljo01	1874	1	PH2	NA	SS	3			4	13	5	1
reachal01	1874	1	PH1	NA	OF	14			24	6	11	1
reedhu01	1874	1	BL1	NA	OF	1			1	0	0	0
remseja01	1874	1	NY2	NA	1B	3			12	0	2	0
remseja01	1874	1	NY2	NA	OF	63			128	12	22	2
revilhe01	1874	1	BL1	NA	OF	1			0	1	0	0
ryanjo01	1874	1	BL1	NA	OF	47			174	7	29	1
ryanjo01	1874	1	BL1	NA	P	1			0	1	0	0
saylo01	1874	1	BL1	NA	SS	18			16	83	27	0
schafha01	1874	1	BS1	NA	3B	71			136	175	85	17
schafha01	1874	1	BS1	NA	SS	1			0	0	0	0
selmafr01	1874	1	BL1	NA	2B	2			2	1	2	0
selmafr01	1874	1	BL1	NA	3B	2			1	0	3	0
selmafr01	1874	1	BL1	NA	C	6			3	4	16	0	0
selmafr01	1874	1	BL1	NA	OF	2			1	0	0	0
selmafr01	1874	1	BL1	NA	SS	6			5	12	19	0
senseco01	1874	1	PH1	NA	OF	5			5	0	3	0
shaffor01	1874	1	HR1	NA	OF	9			22	0	9	0
shaffor01	1874	2	NY2	NA	OF	1			0	0	0	0
smilebi01	1874	1	BL1	NA	3B	2			1	0	3	0
smithjo01	1874	1	BL1	NA	SS	6			9	10	7	0
snowch01	1874	1	BR2	NA	C	1			0	0	3	0	0
snydepo01	1874	1	BL1	NA	C	39			132	47	48	0	0
spaldal01	1874	1	BS1	NA	OF	6			5	0	1	0
spaldal01	1874	1	BS1	NA	P	71			38	143	31	3
startjo01	1874	1	NY2	NA	1B	63			560	13	23	13
startjo01	1874	1	NY2	NA	OF	2			0	0	0	0
stearbi01	1874	1	HR1	NA	OF	19			17	0	7	0
stearbi01	1874	1	HR1	NA	P	22			14	20	20	1
suttoez01	1874	1	PH1	NA	3B	36			62	72	28	4
suttoez01	1874	1	PH1	NA	SS	20			17	64	20	3
sweasch01	1874	1	BL1	NA	2B	8			19	12	17	3
sweasch01	1874	1	BL1	NA	OF	1			0	0	0	0
sweasch01	1874	2	BR2	NA	2B	10			14	44	8	3
tayloza01	1874	1	BL1	NA	1B	13			166	3	16	1
tippeji01	1874	1	HR1	NA	OF	45			107	5	26	1
treacfr01	1874	1	CH2	NA	OF	35			50	14	17	3
westbi01	1874	1	BR2	NA	2B	9			20	33	22	2
westbi01	1874	1	BR2	NA	C	1			0	0	3	0	0
westbi01	1874	1	BR2	NA	SS	1			0	0	1	0
whitede01	1874	1	BS1	NA	1B	1			8	0	3	0
whitede01	1874	1	BS1	NA	C	58			253	39	56	2	0
whitede01	1874	1	BS1	NA	OF	21			12	1	11	0
whitewa01	1874	1	BL1	NA	3B	45			83	183	74	6
whitewa01	1874	1	BL1	NA	C	3			4	3	7	0	0
wood01	1874	1	BL1	NA	2B	1			0	0	1	0
wrighge01	1874	1	BS1	NA	3B	1			0	1	0	0
wrighge01	1874	1	BS1	NA	SS	60			97	197	64	23
wrighha01	1874	1	BS1	NA	OF	40			57	5	13	3
wrighha01	1874	1	BS1	NA	P	6			1	8	1	0
yorkto01	1874	1	PH2	NA	OF	50			161	6	27	0
zettlge01	1874	1	CH2	NA	P	57			27	99	31	1
abadijo01	1875	1	PH3	NA	1B	11			122	3	12	1
abadijo01	1875	2	BR2	NA	1B	1			7	0	1	0
addybo01	1875	1	PH2	NA	2B	2			3	7	3	0
addybo01	1875	1	PH2	NA	OF	68			91	14	33	2
allisar01	1875	1	WS6	NA	1B	23			252	2	21	6
allisar01	1875	1	WS6	NA	C	1			6	1	6	0	0
allisar01	1875	1	WS6	NA	OF	3			5	0	0	0
allisar01	1875	2	HR1	NA	1B	1			11	0	2	0
allisar01	1875	2	HR1	NA	2B	2			3	2	3	0
allisar01	1875	2	HR1	NA	C	1			0	0	1	0	0
allisar01	1875	2	HR1	NA	OF	37			34	17	14	2
allisdo01	1875	1	HR1	NA	1B	2			12	0	2	0
allisdo01	1875	1	HR1	NA	C	59			338	57	46	5	0
allisdo01	1875	1	HR1	NA	OF	2			1	0	0	0
ansonca01	1875	1	PH1	NA	1B	32			269	14	24	13
ansonca01	1875	1	PH1	NA	3B	5			2	8	3	1
ansonca01	1875	1	PH1	NA	C	13			41	14	15	1	0
ansonca01	1875	1	PH1	NA	OF	25			40	13	12	5
arundha01	1875	1	BR2	NA	OF	1			0	0	0	0
arundha01	1875	1	BR2	NA	P	1			0	0	0	0
banckst01	1875	1	NH1	NA	1B	1			0	0	0	0
banckst01	1875	1	NH1	NA	2B	4			15	9	10	0
banckst01	1875	1	NH1	NA	3B	3			2	6	1	0
banckst01	1875	1	NH1	NA	C	14			29	14	11	1	0
banckst01	1875	1	NH1	NA	SS	1			1	2	1	1
barloto01	1875	1	NH1	NA	SS	1			3	5	2	0
barloto01	1875	2	BR2	NA	2B	1			2	0	2	0
barnero01	1875	1	BS1	NA	2B	76			253	252	71	35
barnero01	1875	1	BS1	NA	OF	3			4	0	2	0
barnero01	1875	1	BS1	NA	SS	2			0	1	1	0
barnibi01	1875	1	KEO	NA	C	3			21	4	3	0	0
barnibi01	1875	1	KEO	NA	OF	7			16	0	2	0
barnibi01	1875	2	NY2	NA	C	6			21	6	9	0	0
barnibi01	1875	2	NY2	NA	OF	3			2	0	1	0
battijo01	1875	1	SL2	NA	2B	62			168	211	61	22
battijo01	1875	1	SL2	NA	3B	6			9	19	4	1
battijo01	1875	1	SL2	NA	C	2			2	0	3	0	0
battijo01	1875	1	SL2	NA	OF	1			1	0	0	0
bealsto01	1875	1	BS1	NA	2B	8			21	15	8	4
bealsto01	1875	1	BS1	NA	OF	30			50	2	8	1
bechtge01	1875	1	PH3	NA	P	14			10	24	9	2
bechtge01	1875	2	PH1	NA	OF	31			60	4	15	1
bechtge01	1875	2	PH1	NA	P	4			4	5	0	0
bielaos01	1875	1	CH2	NA	OF	51			68	12	27	2
blongjo01	1875	1	SL1	NA	OF	4			3	2	2	0
blongjo01	1875	1	SL1	NA	P	15			15	36	4	1
bolan01	1875	1	BR2	NA	3B	1			2	1	1	0
bondto01	1875	1	HR1	NA	1B	4			21	0	2	0
bondto01	1875	1	HR1	NA	2B	3			9	8	0	1
bondto01	1875	1	HR1	NA	OF	29			28	10	13	2
bondto01	1875	1	HR1	NA	P	40			32	92	13	4
booth01	1875	1	NH1	NA	SS	1			0	1	1	0
boothed01	1875	1	NY2	NA	2B	8			10	11	4	0
boothed01	1875	1	NY2	NA	OF	63			75	16	19	2
bordejo01	1875	1	PH2	NA	P	7			2	12	3	0
boydbi01	1875	1	BR2	NA	1B	2			16	0	4	0
boydbi01	1875	1	BR2	NA	2B	15			35	37	21	3
boydbi01	1875	1	BR2	NA	3B	9			16	12	16	0
boydbi01	1875	1	BR2	NA	OF	12			14	6	10	0
boydbi01	1875	1	BR2	NA	P	1			0	0	0	0
boydbi01	1875	1	BR2	NA	SS	1			0	0	0	0
bradlge01	1875	1	SL2	NA	2B	1			0	0	1	0
bradlge01	1875	1	SL2	NA	OF	1			0	0	0	0
bradlge01	1875	1	SL2	NA	P	60			52	121	20	8
bradlge01	1875	1	SL2	NA	SS	2			2	2	1	1
brady01	1875	1	CH2	NA	OF	1			4	1	3	0
bradyst01	1875	1	WS6	NA	1B	1			9	0	2	0
bradyst01	1875	1	WS6	NA	2B	18			32	56	20	2
bradyst01	1875	1	WS6	NA	C	1			1	0	0	0	0
bradyst01	1875	1	WS6	NA	OF	2			5	0	1	0
bradyst01	1875	2	HR1	NA	OF	1			2	1	0	0
brannmi01	1875	1	CH2	NA	3B	2			0	3	3	0
brownol01	1875	1	BR2	NA	1B	2			10	0	2	0
brownol01	1875	1	BR2	NA	OF	2			3	0	1	0
burdoja01	1875	1	HR1	NA	2B	73			208	185	46	24
burdoja01	1875	1	HR1	NA	3B	2			3	0	2	0
burdoja01	1875	1	HR1	NA	C	1			0	0	1	0	0
bushodo01	1875	1	BR2	NA	C	1			4	0	1	1	0
carbijo01	1875	1	KEO	NA	1B	10			112	3	6	4
careyto01	1875	1	HR1	NA	2B	1			0	0	0	0
careyto01	1875	1	HR1	NA	SS	86			89	240	61	17
cassijo01	1875	1	BR2	NA	1B	10			101	1	9	2
cassijo01	1875	1	BR2	NA	2B	2			2	3	0	0
cassijo01	1875	1	BR2	NA	OF	12			4	1	5	1
cassijo01	1875	1	BR2	NA	P	30			19	49	19	1
cassijo01	1875	2	NH1	NA	1B	6			80	1	1	4
chapmja01	1875	1	SL2	NA	1B	1			3	0	0	0
chapmja01	1875	1	SL2	NA	OF	43			49	6	20	2
clackbo01	1875	1	BR2	NA	1B	1			3	0	2	0
clackbo01	1875	1	BR2	NA	OF	17			35	4	6	2
clappjo01	1875	1	PH1	NA	C	60			305	62	53	4	0
clintji01	1875	1	BR2	NA	1B	5			29	4	1	1
clintji01	1875	1	BR2	NA	2B	1			5	1	1	0
clintji01	1875	1	BR2	NA	OF	7			9	2	1	0
clintji01	1875	1	BR2	NA	P	17			7	32	8	1
coonwi01	1875	1	PH1	NA	C	4			13	4	4	1	0
coonwi01	1875	1	PH1	NA	OF	1			0	0	0	0
cranefr01	1875	1	BR2	NA	1B	20			213	9	11	12
cranefr01	1875	1	BR2	NA	OF	1			3	0	1	0
cranefr01	1875	1	BR2	NA	SS	1			0	2	2	0
cravebi01	1875	1	PH3	NA	1B	1			13	0	4	2
cravebi01	1875	1	PH3	NA	3B	4			10	10	5	0
cravebi01	1875	1	PH3	NA	SS	9			12	39	15	2
cravebi01	1875	2	PH1	NA	2B	54			140	152	49	28
cravebi01	1875	2	PH1	NA	3B	1			0	1	0	0
cravebi01	1875	2	PH1	NA	C	2			4	1	2	0	0
croftar01	1875	1	SL1	NA	OF	19			24	0	6	0
crowlbi01	1875	1	PH2	NA	1B	1			5	0	0	1
crowlbi01	1875	1	PH2	NA	3B	4			6	6	3	0
crowlbi01	1875	1	PH2	NA	OF	4			11	0	2	0
cummica01	1875	1	HR1	NA	OF	6			4	0	3	0
cummica01	1875	1	HR1	NA	P	48			28	85	11	5
cuthbne01	1875	1	SL2	NA	2B	1			1	0	1	0
cuthbne01	1875	1	SL2	NA	C	3			1	2	5	0	0
cuthbne01	1875	1	SL2	NA	OF	67			102	2	17	0
dailejo01	1875	1	WS6	NA	2B	2			3	4	3	0
dailejo01	1875	1	WS6	NA	3B	5			12	3	7	0
dailejo01	1875	1	WS6	NA	SS	20			27	75	24	2
dailejo01	1875	2	BR2	NA	1B	1			9	0	2	0
dailejo01	1875	2	BR2	NA	OF	2			1	0	0	0
dailejo01	1875	2	BR2	NA	SS	1			0	0	2	0
dehlmhe01	1875	1	SL2	NA	1B	67			849	12	41	26
dehlmhe01	1875	1	SL2	NA	OF	2			2	0	0	0
devliji01	1875	1	CH2	NA	1B	42			472	11	34	11
devliji01	1875	1	CH2	NA	OF	4			1	0	0	0
devliji01	1875	1	CH2	NA	P	28			15	52	11	1
dillojo01	1875	1	SL1	NA	SS	1			0	0	0	0
dillopa01	1875	1	SL1	NA	C	3			11	1	1	0	0
dolele01	1875	1	NH1	NA	OF	1			3	0	1	0
doschhe01	1875	1	WS6	NA	3B	22			32	53	28	1
edwar01	1875	1	BR2	NA	OF	1			1	0	0	0
edwar01	1875	1	BR2	NA	P	1			0	0	1	0
eggleda01	1875	1	PH1	NA	OF	66			132	7	12	3
ellicjo01	1875	1	SL1	NA	3B	5			3	5	9	0
ellicjo01	1875	1	SL1	NA	OF	2			4	0	2	0
evans01	1875	1	NH1	NA	OF	1			0	0	0	0
fergubo01	1875	1	HR1	NA	3B	85			173	157	69	7
fergubo01	1875	1	HR1	NA	P	1			0	0	0	0
fieldsa01	1875	1	PH3	NA	C	2			14	1	6	0	0
fieldsa01	1875	1	PH3	NA	OF	1			1	0	1	0
fieldsa01	1875	2	WS6	NA	C	4			18	1	7	0	0
fieldsa01	1875	2	WS6	NA	OF	1			1	0	0	0
fishech01	1875	1	PH2	NA	OF	5			2	1	1	1
fishech01	1875	1	PH2	NA	P	41			33	53	10	1
fislewe01	1875	1	PH1	NA	1B	46			450	6	20	25
fislewe01	1875	1	PH1	NA	2B	5			10	9	1	0
fislewe01	1875	1	PH1	NA	OF	10			7	1	3	0
fleetfr01	1875	1	SL2	NA	3B	1			1	3	1	1
fleetfr01	1875	1	SL2	NA	OF	1			1	0	1	0
fleetfr01	1875	1	SL2	NA	P	3			2	7	1	1
fleetfr01	1875	2	BR2	NA	2B	10			24	23	15	1
fleetfr01	1875	2	BR2	NA	3B	1			0	0	0	0
fleetfr01	1875	2	BR2	NA	C	11			34	7	16	1	0
fleetfr01	1875	2	BR2	NA	P	2			1	6	2	0
fleetfr01	1875	2	BR2	NA	SS	9			9	19	8	0
flintsi01	1875	1	SL1	NA	3B	1			0	0	1	0
flintsi01	1875	1	SL1	NA	C	16			72	19	20	1	0
flintsi01	1875	1	SL1	NA	OF	2			2	0	1	0
foleywi01	1875	1	CH2	NA	3B	3			4	9	3	1
forceda01	1875	1	PH1	NA	3B	2			3	1	1	0
forceda01	1875	1	PH1	NA	SS	77			116	259	48	22
fulmech01	1875	1	PH2	NA	3B	17			28	28	15	4
fulmech01	1875	1	PH2	NA	SS	53			77	181	51	7
fulmewa01	1875	1	BR2	NA	OF	1			3	0	1	0
galvipu01	1875	1	SL2	NA	OF	6			6	0	1	0
galvipu01	1875	1	SL2	NA	P	8			1	22	2	1
gedneco01	1875	1	NY2	NA	OF	67			201	8	39	2
gedneco01	1875	1	NY2	NA	P	2			3	3	1	0
geerbi01	1875	1	NH1	NA	1B	1			8	2	2	0
geerbi01	1875	1	NH1	NA	2B	13			48	47	26	2
geerbi01	1875	1	NH1	NA	3B	1			1	1	1	0
geerbi01	1875	1	NH1	NA	OF	17			20	6	8	3
geerbi01	1875	1	NH1	NA	SS	6			14	18	12	0
gerhajo01	1875	1	NY2	NA	2B	13			28	37	15	5
gerhajo01	1875	1	NY2	NA	3B	47			82	98	59	3
gerhajo01	1875	1	NY2	NA	OF	1			0	0	0	0
gerhajo01	1875	1	NY2	NA	SS	1			1	4	1	0
gilgahu01	1875	1	BR2	NA	C	1			2	0	0	0	0
gilgahu01	1875	1	BR2	NA	OF	1			1	0	0	0
gilmoji01	1875	1	WS6	NA	3B	1			0	0	0	0
gilmoji01	1875	1	WS6	NA	C	2			3	3	3	0	0
gilmoji01	1875	1	WS6	NA	OF	1			1	1	0	0
gilro01	1875	1	PH1	NA	C	1			4	0	1	0	0
gilro01	1875	1	PH1	NA	OF	1			1	2	2	0
glennjo01	1875	1	CH2	NA	1B	29			309	0	26	10
glennjo01	1875	1	CH2	NA	OF	44			103	3	12	1
goldemi01	1875	1	KEO	NA	P	13			9	18	5	0
goldemi01	1875	2	CH2	NA	OF	27			45	5	10	1
goldemi01	1875	2	CH2	NA	P	14			13	21	6	0
goldsfr01	1875	1	NH1	NA	2B	1			4	3	3	0
goldswa01	1875	1	KEO	NA	3B	13			12	23	8	2
gouldch01	1875	1	NH1	NA	1B	26			329	3	19	8
gouldch01	1875	1	NH1	NA	C	1			2	0	5	0	0
gouldch01	1875	1	NH1	NA	OF	1			1	0	1	0
haguebi01	1875	1	SL2	NA	1B	1			12	0	3	0
haguebi01	1875	1	SL2	NA	3B	62			90	128	61	3
hallge01	1875	1	PH1	NA	1B	1			1	0	0	0
hallge01	1875	1	PH1	NA	OF	77			165	8	22	2
halliji01	1875	1	KEO	NA	SS	13			14	32	16	2
halliji01	1875	2	NY2	NA	3B	1			1	1	3	0
halliji01	1875	2	NY2	NA	OF	1			0	0	0	0
halliji01	1875	2	NY2	NA	SS	43			52	134	57	3
hallji01	1875	1	KEO	NA	OF	1			0	0	1	0
harbibi01	1875	1	HR1	NA	1B	3			23	1	1	1
harbibi01	1875	1	HR1	NA	2B	11			26	20	14	4
harbibi01	1875	1	HR1	NA	C	31			150	26	26	1	0
harbibi01	1875	1	HR1	NA	OF	13			11	3	4	1
harbibi01	1875	1	HR1	NA	SS	1			0	1	1	0
harriri01	1875	1	NH1	NA	C	1			0	1	2	0	0
harriri01	1875	1	NH1	NA	SS	1			0	1	1	0
hastisc01	1875	1	CH2	NA	2B	3			2	7	3	0
hastisc01	1875	1	CH2	NA	C	46			171	53	51	2	0
hastisc01	1875	1	CH2	NA	OF	29			29	8	11	0
hatfijo01	1875	1	NY2	NA	OF	1			2	0	0	0
hautzch01	1875	1	SL1	NA	1B	19			231	3	20	6
heifefr01	1875	1	BS1	NA	1B	9			54	0	7	1
heifefr01	1875	1	BS1	NA	OF	6			12	0	3	0
heifefr01	1875	1	BS1	NA	P	2			0	0	0	0
helli01	1875	1	BR2	NA	2B	1			3	3	2	0
hicksna01	1875	1	NY2	NA	C	60			296	67	80	7	0
hicksna01	1875	1	NY2	NA	OF	5			5	1	1	0
highadi01	1875	1	CH2	NA	2B	13			34	38	17	2
highadi01	1875	1	CH2	NA	C	24			110	14	27	0	0
highadi01	1875	1	CH2	NA	OF	14			11	1	3	0
highadi01	1875	2	NY2	NA	1B	2			12	0	3	0
highadi01	1875	2	NY2	NA	2B	6			23	14	9	1
highadi01	1875	2	NY2	NA	C	8			27	7	12	0	0
highadi01	1875	2	NY2	NA	OF	3			2	0	0	0
hinespa01	1875	1	CH2	NA	2B	30			88	110	36	11
hinespa01	1875	1	CH2	NA	C	1			0	0	0	0	0
hinespa01	1875	1	CH2	NA	OF	39			81	7	11	3
hinespa01	1875	1	CH2	NA	SS	1			0	1	1	1
holdsji01	1875	1	NY2	NA	OF	45			87	12	28	2
holdsji01	1875	1	NY2	NA	SS	26			33	74	35	5
holliho01	1875	1	WS6	NA	OF	19			32	6	8	1
jonesch01	1875	1	KEO	NA	OF	12			10	2	3	0
jonesch01	1875	2	HR1	NA	OF	1			2	0	1	0
keenaji01	1875	1	NH1	NA	3B	2			2	0	9	0
keenaji01	1875	1	NH1	NA	C	3			6	2	2	0	0
keenaji01	1875	1	NH1	NA	OF	1			0	0	0	0
keerlge01	1875	1	CH2	NA	2B	6			8	14	5	0
kesslhe01	1875	1	BR2	NA	1B	1			3	0	0	0
kesslhe01	1875	1	BR2	NA	2B	1			3	1	2	0
kesslhe01	1875	1	BR2	NA	C	3			8	1	3	1	0
kesslhe01	1875	1	BR2	NA	OF	7			9	2	8	0
kesslhe01	1875	1	BR2	NA	SS	18			24	53	20	1
knighge01	1875	1	NH1	NA	P	1			2	1	0	0
knighlo01	1875	1	PH1	NA	P	13			10	25	5	1
knighlo01	1875	1	PH1	NA	SS	1			0	2	2	0
knowdja01	1875	1	BR2	NA	2B	1			2	1	0	1
knowdja01	1875	1	BR2	NA	C	33			128	29	44	4	0
knowdja01	1875	1	BR2	NA	OF	4			8	0	0	0
knowdja01	1875	1	BR2	NA	SS	11			11	31	24	0
lathaju01	1875	1	BS1	NA	1B	16			174	5	14	12
lathaju01	1875	2	NH1	NA	1B	14			181	6	9	7
lathaju01	1875	2	NH1	NA	3B	3			2	7	5	0
lathaju01	1875	2	NH1	NA	SS	4			3	18	8	1
leonaan01	1875	1	BS1	NA	2B	2			2	3	0	0
leonaan01	1875	1	BS1	NA	3B	3			6	6	7	2
leonaan01	1875	1	BS1	NA	OF	73			125	12	33	0
leonaan01	1875	1	BS1	NA	SS	3			5	10	3	0
lovetle01	1875	1	PH3	NA	OF	6			6	1	3	0
lowryjo01	1875	1	WS6	NA	OF	6			8	0	3	0
luffhe01	1875	1	NH1	NA	3B	30			36	55	41	5
luffhe01	1875	1	NH1	NA	OF	4			4	1	0	0
luffhe01	1875	1	NH1	NA	P	10			7	15	8	0
luffhe01	1875	1	NH1	NA	SS	1			1	1	1	0
malonfe01	1875	1	PH2	NA	1B	22			203	1	18	4
malonfe01	1875	1	PH2	NA	C	6			16	6	9	3	0
malonfe01	1875	1	PH2	NA	OF	2			4	0	1	0
mannija01	1875	1	BS1	NA	1B	3			14	0	1	1
mannija01	1875	1	BS1	NA	3B	1			2	0	0	0
mannija01	1875	1	BS1	NA	OF	65			62	15	19	2
mannija01	1875	1	BS1	NA	P	27			6	29	8	1
martial01	1875	1	BR2	NA	OF	6			10	0	1	0
masonch01	1875	1	PH3	NA	1B	2			23	0	4	1
masonch01	1875	1	PH3	NA	C	1			0	0	0	0	0
masonch01	1875	1	PH3	NA	OF	10			20	3	9	0
masonch01	1875	2	WS6	NA	OF	8			17	3	2	0
masonch01	1875	2	WS6	NA	P	1			0	0	0	0
mathebo01	1875	1	NY2	NA	OF	1			0	0	0	0
mathebo01	1875	1	NY2	NA	P	70			44	106	29	4
mcbridi01	1875	1	PH1	NA	OF	1			0	0	0	0
mcbridi01	1875	1	PH1	NA	P	60			28	77	5	4
mcclobi01	1875	1	WS6	NA	C	11			32	3	17	0	0
mcgeami01	1875	1	PH2	NA	2B	23			64	88	24	6
mcgeami01	1875	1	PH2	NA	3B	27			50	51	35	2
mcgeami01	1875	1	PH2	NA	OF	3			5	1	1	0
mcgeami01	1875	1	PH2	NA	SS	18			19	51	19	3
mcgeepa01	1875	1	NY2	NA	OF	25			37	2	7	0
mcgeepa01	1875	2	BR2	NA	2B	6			17	23	10	0
mcgeepa01	1875	2	BR2	NA	3B	1			2	1	2	0
mcgeepa01	1875	2	BR2	NA	OF	13			24	7	3	1
mcginti01	1875	1	PH3	NA	C	12			39	14	29	0	0
mcginti01	1875	1	PH3	NA	OF	2			2	0	2	0
mcginti01	1875	2	NH1	NA	3B	2			1	1	1	0
mcginti01	1875	2	NH1	NA	C	32			143	28	41	3	0
mckeljo01	1875	1	NH1	NA	3B	5			6	7	8	1
mckeljo01	1875	1	NH1	NA	OF	39			34	6	21	1
mcmuljo01	1875	1	PH2	NA	OF	54			112	4	23	2
mcmuljo01	1875	1	PH2	NA	P	4			0	0	1	0
mcsortr01	1875	1	SL1	NA	3B	9			13	22	12	0
mcsortr01	1875	1	SL1	NA	OF	7			14	0	2	0
mcveyca01	1875	1	BS1	NA	1B	55			532	13	29	28
mcveyca01	1875	1	BS1	NA	C	16			74	21	14	1	0
mcveyca01	1875	1	BS1	NA	OF	23			29	2	5	0
mcveyca01	1875	1	BS1	NA	P	3			1	2	1	0
metcaal01	1875	1	NY2	NA	3B	5			8	12	10	0
metcaal01	1875	1	NY2	NA	OF	2			0	0	0	0
metcaal01	1875	1	NY2	NA	SS	1			1	0	1	0
meyerle01	1875	1	PH2	NA	1B	16			174	2	14	6
meyerle01	1875	1	PH2	NA	2B	36			98	91	31	9
meyerle01	1875	1	PH2	NA	3B	20			22	17	19	2
millejo01	1875	1	KEO	NA	2B	13			46	41	13	4
millejo01	1875	2	CH2	NA	2B	14			29	38	18	2
millejo01	1875	2	CH2	NA	OF	1			0	0	0	0
milleto01	1875	1	SL2	NA	3B	2			2	6	4	0
milleto01	1875	1	SL2	NA	C	53			185	59	51	3	0
millsev01	1875	1	HR1	NA	1B	80			737	12	44	40
mooremo01	1875	1	BR2	NA	1B	8			69	2	11	0
mooremo01	1875	1	BR2	NA	2B	1			1	2	2	0
mooremo01	1875	1	BR2	NA	3B	1			1	2	2	0
mooremo01	1875	1	BR2	NA	C	1			1	0	0	0	0
mooremo01	1875	1	BR2	NA	OF	2			1	0	1	0
mooremo01	1875	1	BR2	NA	SS	14			15	47	21	0
morgapi01	1875	1	SL1	NA	3B	7			6	8	12	0
morgapi01	1875	1	SL1	NA	OF	10			13	1	3	0
morgapi01	1875	1	SL1	NA	P	7			5	8	2	0
munnho01	1875	1	BR2	NA	2B	1			2	3	1	0
murnati01	1875	1	PH2	NA	1B	31			288	5	26	8
murnati01	1875	1	PH2	NA	2B	15			53	52	19	5
murnati01	1875	1	PH2	NA	OF	26			53	0	9	0
nelsoca01	1875	1	NY2	NA	2B	49			109	139	42	14
nelsoca01	1875	1	NY2	NA	3B	23			41	50	22	1
nelsoca01	1875	1	NY2	NA	OF	1			2	0	0	0
nelsoca01	1875	1	NY2	NA	SS	2			1	0	0	0
nichoal01	1875	1	BR2	NA	3B	32			68	82	41	8
nichotr01	1875	1	NH1	NA	OF	3			2	0	2	0
nichotr01	1875	1	NH1	NA	P	34			14	107	28	4
oneilj01	1875	1	BR2	NA	1B	1			12	1	1	0
oneilj01	1875	1	BR2	NA	OF	3			3	1	2	0
oneilj01	1875	1	BR2	NA	P	5			3	9	2	0
oranto01	1875	1	SL1	NA	OF	19			16	3	11	0
oranto01	1875	1	SL1	NA	SS	1			0	2	1	0
orourji01	1875	1	BS1	NA	1B	6			44	0	4	1
orourji01	1875	1	BS1	NA	3B	27			26	55	34	3
orourji01	1875	1	BS1	NA	C	1			0	0	0	0	0
orourji01	1875	1	BS1	NA	OF	45			72	8	20	1
paborch01	1875	1	BR2	NA	OF	42			97	5	25	1
paborch01	1875	1	BR2	NA	P	1			1	1	1	0
paborch01	1875	2	NH1	NA	OF	6			9	0	2	0
parksbi01	1875	1	WS6	NA	OF	17			47	4	10	0
parksbi01	1875	1	WS6	NA	P	14			14	19	6	0
parksbi01	1875	2	PH2	NA	OF	2			4	0	1	0
parksbi01	1875	2	PH2	NA	P	2			1	0	1	0
patteda01	1875	1	BR2	NA	2B	7			11	10	12	0
patteda01	1875	1	BR2	NA	OF	7			8	0	3	0
pearcdi01	1875	1	SL2	NA	P	2			0	1	1	0
pearcdi01	1875	1	SL2	NA	SS	70			74	262	69	17
peterjo01	1875	1	CH2	NA	2B	6			14	13	6	2
peterjo01	1875	1	CH2	NA	SS	65			66	239	45	18
phelpne01	1875	1	NY2	NA	OF	2			2	1	0	0
pikeli01	1875	1	SL2	NA	2B	10			20	26	6	1
pikeli01	1875	1	SL2	NA	3B	2			2	1	2	1
pikeli01	1875	1	SL2	NA	OF	64			111	5	15	2
pikeli01	1875	1	SL2	NA	SS	1			1	0	1	0
quinnpa01	1875	1	BR2	NA	OF	2			4	0	1	0
quinnpa01	1875	1	BR2	NA	SS	1			0	0	2	0
quinnpa02	1875	1	KEO	NA	C	10			50	12	10	0	0
quinnpa02	1875	1	KEO	NA	OF	1			2	0	0	0
quinnpa02	1875	2	HR1	NA	C	3			9	1	2	0	0
quinnpa02	1875	2	HR1	NA	OF	3			4	0	4	0
quinnpa02	1875	3	CH2	NA	C	11			32	10	12	0	0
quinnpa02	1875	3	CH2	NA	OF	10			4	0	9	0
radcljo01	1875	1	PH3	NA	SS	5			5	23	15	0
reachal01	1875	1	PH1	NA	2B	1			1	2	3	0
reachal01	1875	1	PH1	NA	OF	2			1	0	0	0
redmobi01	1875	1	SL1	NA	C	2			3	0	0	0	0
redmobi01	1875	1	SL1	NA	SS	19			22	81	20	0
remseja01	1875	1	HR1	NA	OF	86			162	10	22	1
resslla01	1875	1	WS6	NA	2B	7			18	25	18	0
resslla01	1875	1	WS6	NA	OF	20			44	10	11	2
rextewi01	1875	1	BR2	NA	OF	1			1	0	0	0
richmjo01	1875	1	PH1	NA	2B	17			44	35	18	6
richmjo01	1875	1	PH1	NA	C	3			6	4	3	0	0
richmjo01	1875	1	PH1	NA	OF	11			18	4	5	0
rileybi01	1875	1	KEO	NA	OF	8			10	2	6	0
rocapad01	1875	1	PH1	NA	2B	4			13	7	10	0
rocapad01	1875	1	PH1	NA	OF	12			23	3	5	0
ryanjo01	1875	1	NH1	NA	C	4			10	2	5	0	0
ryanjo01	1875	1	NH1	NA	OF	30			42	1	11	1
ryanjo01	1875	1	NH1	NA	P	10			9	9	10	0
ryanjo01	1875	1	NH1	NA	SS	1			0	5	1	0
saylo01	1875	1	WS6	NA	2B	2			2	3	2	0
saylo01	1875	1	WS6	NA	OF	1			1	0	2	0
saylo01	1875	1	WS6	NA	SS	8			13	31	19	0
schafha01	1875	1	BS1	NA	3B	51			73	109	47	4
schafha01	1875	1	BS1	NA	OF	1			1	0	0	0
selmafr01	1875	1	WS6	NA	1B	1			11	0	0	0
sewarge01	1875	1	SL2	NA	2B	2			3	2	1	0
sewarge01	1875	1	SL2	NA	C	18			65	20	19	0	0
sewarge01	1875	1	SL2	NA	OF	7			8	2	2	0
shaff01	1875	1	BR2	NA	OF	1			1	0	1	0
shaffor01	1875	1	PH2	NA	1B	2			10	0	0	1
shaffor01	1875	1	PH2	NA	3B	5			2	6	3	0
shaffor01	1875	1	PH2	NA	OF	12			19	1	6	1
sheri01	1875	1	BR2	NA	OF	1			0	0	0	0
simmojo01	1875	1	KEO	NA	1B	3			27	2	1	0
simmojo01	1875	1	KEO	NA	OF	10			10	1	4	0
smithjo01	1875	1	NH1	NA	SS	1			1	2	3	0
smithto01	1875	1	BR2	NA	2B	3			7	11	5	0
snydepo01	1875	1	PH2	NA	1B	1			5	0	0	0
snydepo01	1875	1	PH2	NA	C	66			304	58	77	2	0
somered01	1875	1	PH3	NA	2B	14			38	36	22	2
somered01	1875	1	PH3	NA	SS	1			0	0	0	0
somered01	1875	2	NH1	NA	1B	1			5	0	1	0
somered01	1875	2	NH1	NA	2B	29			98	125	55	13
somered01	1875	2	NH1	NA	3B	2			7	2	1	0
somered01	1875	2	NH1	NA	SS	1			0	1	1	0
spaldal01	1875	1	BS1	NA	1B	4			28	0	0	0
spaldal01	1875	1	BS1	NA	OF	18			11	0	6	0
spaldal01	1875	1	BS1	NA	P	72			51	133	19	10
startjo01	1875	1	NY2	NA	1B	69			702	12	39	20
stearbi01	1875	1	WS6	NA	OF	7			10	1	5	1
stearbi01	1875	1	WS6	NA	P	17			13	19	16	0
stevero01	1875	1	WS6	NA	OF	1			0	0	1	0
stodd01	1875	1	BR2	NA	OF	2			4	0	1	0
sulli01	1875	1	NH1	NA	OF	2			1	0	0	0
suttoez01	1875	1	PH1	NA	1B	2			15	0	1	1
suttoez01	1875	1	PH1	NA	3B	73			133	168	74	10
suttoez01	1875	1	PH1	NA	OF	1			2	0	0	0
suttoez01	1875	1	PH1	NA	P	2			0	0	1	0
suttoez01	1875	1	PH1	NA	SS	1			0	0	0	0
sweasch01	1875	1	SL1	NA	2B	19			56	45	21	5
terry01	1875	1	WS6	NA	1B	4			34	0	8	0
terry01	1875	1	WS6	NA	OF	3			1	0	3	0
thompan01	1875	1	WS6	NA	C	11			47	6	32	1	0
thompan01	1875	1	WS6	NA	OF	1			1	0	0	0
thompfr01	1875	1	BR2	NA	OF	1			0	0	2	0
tippeji01	1875	1	NH1	NA	OF	41			58	6	17	1
treacfr01	1875	1	PH3	NA	OF	11			26	2	5	1
treacfr01	1875	2	PH2	NA	OF	43			106	3	18	1
trenwge01	1875	1	PH3	NA	3B	10			10	11	15	0
trenwge01	1875	2	NH1	NA	3B	6			9	9	8	0
waittch01	1875	1	SL2	NA	1B	4			31	0	0	2
waittch01	1875	1	SL2	NA	OF	28			34	3	10	2
walkeos01	1875	1	BR2	NA	1B	1			2	0	3	1
walkeos01	1875	1	BR2	NA	OF	1			0	1	1	0
warnefr01	1875	1	PH3	NA	OF	14			27	2	8	0
waterfr01	1875	1	CH2	NA	3B	5			5	7	10	1
weavesa01	1875	1	PH2	NA	P	1			0	1	0	0
whitede01	1875	1	BS1	NA	1B	1			9	0	1	0
whitede01	1875	1	BS1	NA	C	75			355	87	60	6	0
whitede01	1875	1	BS1	NA	OF	14			4	1	2	0
whitewa01	1875	1	CH2	NA	2B	2			2	2	2	0
whitewa01	1875	1	CH2	NA	3B	59			99	136	54	4
whitewa01	1875	1	CH2	NA	OF	5			11	0	2	0
whitewa01	1875	1	CH2	NA	SS	5			3	17	7	0
withech01	1875	1	WS6	NA	P	1			0	0	0	0
wrighge01	1875	1	BS1	NA	P	2			0	1	0	0
wrighge01	1875	1	BS1	NA	SS	79			95	253	56	20
wrighha01	1875	1	BS1	NA	OF	1			1	0	0	0
wrighsa01	1875	1	NH1	NA	SS	33			22	145	40	5
yorkto01	1875	1	HR1	NA	OF	86			190	7	30	1
zettlge01	1875	1	CH2	NA	1B	3			21	0	6	0
zettlge01	1875	1	CH2	NA	P	31			21	62	7	0
zettlge01	1875	2	PH2	NA	P	21			14	28	1	3
addybo01	1876	1	CHN	NL	OF	32			46	6	13	0
allisar01	1876	1	LS1	NL	1B	8			90	1	4	2
allisar01	1876	1	LS1	NL	OF	23			34	11	12	1
allisdo01	1876	1	HAR	NL	C	40			201	43	33	2	12
allisdo01	1876	1	HAR	NL	OF	6			5	0	1	0
andrufr01	1876	1	CHN	NL	OF	8			5	0	2	0
ansonca01	1876	1	CHN	NL	3B	66			135	147	50	8
ansonca01	1876	1	CHN	NL	C	2			2	0	0	0	1
barnero01	1876	1	CHN	NL	2B	66			167	199	36	22
barnero01	1876	1	CHN	NL	P	1			0	0	0	0
battijo01	1876	1	SL3	NL	2B	1			3	1	0	0
battijo01	1876	1	SL3	NL	3B	63			115	145	40	8
bechtge01	1876	1	LS1	NL	OF	14			14	1	2	0
bechtge01	1876	2	NY3	NL	OF	2			3	0	4	0
berghjo01	1876	1	PHN	NL	C	1			2	2	1	0	5
berghjo01	1876	1	PHN	NL	OF	1			1	0	0	0
bielaos01	1876	1	CHN	NL	OF	32			41	4	14	1
blongjo01	1876	1	SL3	NL	OF	62			64	13	9	2
blongjo01	1876	1	SL3	NL	P	1			0	2	0	0
bondto01	1876	1	HAR	NL	P	45			25	93	15	0
bootham01	1876	1	CN1	NL	3B	24			29	28	18	0
bootham01	1876	1	CN1	NL	C	24			77	29	38	3	26
bootham01	1876	1	CN1	NL	OF	3			1	0	1	0
bootham01	1876	1	CN1	NL	P	3			0	1	1	0
bootham01	1876	1	CN1	NL	SS	22			31	59	18	7
boothed01	1876	1	NY3	NL	2B	5			15	7	5	1
boothed01	1876	1	NY3	NL	OF	53			73	11	26	0
boothed01	1876	1	NY3	NL	P	1			0	0	0	0
bordejo01	1876	1	BSN	NL	OF	16			5	1	7	0
bordejo01	1876	1	BSN	NL	P	29			15	33	22	0
bradlfo01	1876	1	BSN	NL	OF	4			2	0	1	0
bradlfo01	1876	1	BSN	NL	P	22			10	24	2	0
bradlge01	1876	1	SL3	NL	P	64			50	87	12	4
brownle01	1876	1	BSN	NL	C	45			192	45	40	4	32
brownle01	1876	1	BSN	NL	OF	1			1	0	0	0
burdoja01	1876	1	HAR	NL	2B	69			211	174	45	18
burdoja01	1876	1	HAR	NL	3B	1			0	1	0	1
bushodo01	1876	1	PHN	NL	C	5			24	6	9	0	12
carbijo01	1876	1	LS1	NL	1B	6			71	1	10	4
carbijo01	1876	1	LS1	NL	OF	1			1	1	0	1
careyto01	1876	1	HAR	NL	SS	68			74	218	39	9
cassijo01	1876	1	HAR	NL	1B	4			34	2	2	3
cassijo01	1876	1	HAR	NL	OF	8			7	2	0	0
chapmja01	1876	1	LS1	NL	3B	1			1	0	1	1
chapmja01	1876	1	LS1	NL	OF	17			16	2	6	0
clackbo01	1876	1	CN1	NL	1B	5			45	0	1	1
clackbo01	1876	1	CN1	NL	2B	8			21	22	7	0
clackbo01	1876	1	CN1	NL	3B	3			3	6	4	0
clackbo01	1876	1	CN1	NL	OF	17			36	3	14	0
clackbo01	1876	1	CN1	NL	P	1			0	1	0	0
clappjo01	1876	1	SL3	NL	2B	1			0	0	1	0
clappjo01	1876	1	SL3	NL	C	61			333	56	56	5	52
clappjo01	1876	1	SL3	NL	OF	4			2	0	1	0
clintji01	1876	1	LS1	NL	1B	1			6	0	0	0
clintji01	1876	1	LS1	NL	OF	14			14	4	5	1
clintji01	1876	1	LS1	NL	P	1			0	3	2	0
collida01	1876	1	LS1	NL	OF	7			8	2	1	1
coonwi01	1876	1	PHN	NL	2B	4			8	10	8	1
coonwi01	1876	1	PHN	NL	3B	4			5	3	8	0
coonwi01	1876	1	PHN	NL	C	18			50	10	27	0	21
coonwi01	1876	1	PHN	NL	OF	29			43	8	16	1
coonwi01	1876	1	PHN	NL	P	2			0	0	1	0
cravebi01	1876	1	NY3	NL	2B	42			95	84	41	7
cravebi01	1876	1	NY3	NL	C	11			57	21	26	2	8
cravebi01	1876	1	NY3	NL	SS	6			6	17	5	1
cummica01	1876	1	HAR	NL	P	24			9	27	2	0
currepe01	1876	1	PHN	NL	C	2			9	1	7	0	2
currepe01	1876	1	PHN	NL	OF	1			1	1	3	1
cuthbne01	1876	1	SL3	NL	OF	63			95	7	19	2
deando01	1876	1	CN1	NL	OF	5			4	0	2	0
deando01	1876	1	CN1	NL	P	30			22	38	13	2
deando01	1876	1	CN1	NL	SS	2			0	0	0	0
dehlmhe01	1876	1	SL3	NL	1B	64			750	8	33	21
devliji01	1876	1	LS1	NL	1B	1			8	1	1	1
devliji01	1876	1	LS1	NL	P	68			44	100	9	4
eggleda01	1876	1	PHN	NL	OF	39			109	6	11	1
fairge01	1876	1	NY3	NL	2B	1			2	4	2	1
fergubo01	1876	1	HAR	NL	3B	69			124	133	54	5
fieldsa01	1876	1	CN1	NL	2B	2			6	1	3	0
fieldsa01	1876	1	CN1	NL	C	3			4	0	2	0	1
fishech01	1876	1	CN1	NL	1B	1			4	0	0	0
fishech01	1876	1	CN1	NL	OF	11			12	1	1	0
fishech01	1876	1	CN1	NL	P	28			19	27	12	0
fishech01	1876	1	CN1	NL	SS	1			3	1	2	0
fislewe01	1876	1	PHN	NL	1B	14			141	4	3	3
fislewe01	1876	1	PHN	NL	2B	21			45	65	22	7
fislewe01	1876	1	PHN	NL	OF	24			46	5	5	1
fislewe01	1876	1	PHN	NL	SS	1			2	1	0	0
foleywi01	1876	1	CN1	NL	3B	46			67	101	41	4
foleywi01	1876	1	CN1	NL	C	20			70	10	22	1	19
forceda01	1876	1	PHN	NL	3B	2			2	3	2	0
forceda01	1876	1	PHN	NL	SS	60			108	237	39	11
forceda01	1876	2	NY3	NL	SS	1			2	3	1	0
fousebi01	1876	1	PHN	NL	1B	1			7	1	3	0
fousebi01	1876	1	PHN	NL	2B	14			34	52	18	3
fousebi01	1876	1	PHN	NL	OF	7			11	3	3	0
fulmech01	1876	1	LS1	NL	SS	66			83	209	47	13
gerhajo01	1876	1	LS1	NL	1B	54			664	13	40	13
gerhajo01	1876	1	LS1	NL	2B	5			16	16	2	1
gerhajo01	1876	1	LS1	NL	3B	2			5	4	4	0
gerhajo01	1876	1	LS1	NL	OF	2			7	3	0	0
gerhajo01	1876	1	LS1	NL	SS	3			3	8	1	1
glennjo01	1876	1	CHN	NL	1B	15			112	0	8	4
glennjo01	1876	1	CHN	NL	OF	56			128	5	18	1
gouldch01	1876	1	CN1	NL	1B	61			584	13	39	28
gouldch01	1876	1	CN1	NL	P	2			0	1	1	0
haguebi01	1876	1	LS1	NL	3B	67			67	89	51	5
haguebi01	1876	1	LS1	NL	SS	1			0	1	1	0
hallge01	1876	1	PHN	NL	OF	60			150	7	39	3
halliji01	1876	1	NY3	NL	2B	4			4	6	6	0
halliji01	1876	1	NY3	NL	OF	2			0	0	0	0
halliji01	1876	1	NY3	NL	SS	50			45	172	67	7
harbibi01	1876	1	HAR	NL	1B	2			9	0	2	0
harbibi01	1876	1	HAR	NL	C	24			97	30	32	0	9
harbibi01	1876	1	HAR	NL	OF	6			5	1	2	1
hastisc01	1876	1	LS1	NL	C	5			24	6	11	0	13
hastisc01	1876	1	LS1	NL	OF	65			98	11	16	4
hatfijo01	1876	1	NY3	NL	2B	1			1	4	1	0
hayesmi01	1876	1	NY3	NL	OF	5			15	0	2	0
heubege01	1876	1	NY3	NL	1B	1			6	0	2	0
hicksna01	1876	1	NY3	NL	C	45			222	47	94	3	28
highadi01	1876	1	HAR	NL	2B	1			3	2	0	0
highadi01	1876	1	HAR	NL	C	13			38	14	14	0	10
highadi01	1876	1	HAR	NL	OF	59			57	16	11	1
highadi01	1876	1	HAR	NL	SS	1			1	3	1	0
hinespa01	1876	1	CHN	NL	2B	1			0	0	0	0
hinespa01	1876	1	CHN	NL	OF	64			159	8	14	4
holbebi01	1876	1	LS1	NL	C	12			62	24	16	3	7
holdsji01	1876	1	NY3	NL	2B	3			10	4	2	1
holdsji01	1876	1	NY3	NL	OF	49			109	10	13	1
jonesch01	1876	1	CN1	NL	OF	64			151	11	27	2
kesslhe01	1876	1	CN1	NL	OF	16			20	7	5	2
kesslhe01	1876	1	CN1	NL	SS	46			57	118	47	11
knighlo01	1876	1	PHN	NL	1B	13			91	3	8	6
knighlo01	1876	1	PHN	NL	2B	6			17	4	11	3
knighlo01	1876	1	PHN	NL	OF	9			15	0	3	0
knighlo01	1876	1	PHN	NL	P	34			33	41	18	1
laffefl01	1876	1	PHN	NL	P	1			1	2	1	1
larkite01	1876	1	NY3	NL	P	1			0	2	2	0
leonaan01	1876	1	BSN	NL	2B	30			89	81	29	10
leonaan01	1876	1	BSN	NL	OF	35			68	6	6	2
mackde01	1876	1	SL3	NL	2B	5			14	10	4	2
mackde01	1876	1	SL3	NL	OF	2			3	0	2	0
mackde01	1876	1	SL3	NL	SS	41			42	114	20	6
malonfe01	1876	1	PHN	NL	C	20			78	30	31	0	25
malonfe01	1876	1	PHN	NL	OF	3			3	0	0	0
malonfe01	1876	1	PHN	NL	SS	1			1	2	1	0
malonjo01	1876	1	NY3	NL	OF	2			4	0	1	0
mannija01	1876	1	BSN	NL	2B	1			2	0	3	0
mannija01	1876	1	BSN	NL	OF	56			73	7	23	0
mannija01	1876	1	BSN	NL	P	34			10	30	0	3
mannija01	1876	1	BSN	NL	SS	1			0	0	0	0
mathebo01	1876	1	NY3	NL	OF	1			0	0	0	0
mathebo01	1876	1	NY3	NL	P	56			41	78	28	0
mcbridi01	1876	1	BSN	NL	OF	1			0	0	0	0
mcbridi01	1876	1	BSN	NL	P	4			0	5	1	0
mcgeami01	1876	1	SL3	NL	2B	56			132	180	39	16
mcgeami01	1876	1	SL3	NL	3B	1			0	4	0	0
mcgeami01	1876	1	SL3	NL	C	5			14	1	5	1	5
mcgeami01	1876	1	SL3	NL	OF	1			0	0	0	0
mcginti01	1876	1	BSN	NL	C	3			17	3	10	1	5
mcginti01	1876	1	BSN	NL	OF	6			9	0	6	0
mcguijo01	1876	1	NY3	NL	2B	1			0	1	1	0
mcguijo01	1876	1	NY3	NL	C	1			1	0	3	0	1
mcveyca01	1876	1	CHN	NL	1B	55			485	10	21	21
mcveyca01	1876	1	CHN	NL	3B	1			2	0	0	0
mcveyca01	1876	1	CHN	NL	C	6			23	1	2	0	1
mcveyca01	1876	1	CHN	NL	OF	1			0	0	0	0
mcveyca01	1876	1	CHN	NL	P	11			1	13	4	0
meyerle01	1876	1	PHN	NL	2B	3			8	8	2	1
meyerle01	1876	1	PHN	NL	3B	49			84	101	49	4
meyerle01	1876	1	PHN	NL	OF	3			3	0	1	0
meyerle01	1876	1	PHN	NL	P	2			3	1	0	0
millsev01	1876	1	HAR	NL	1B	63			644	7	42	13
morrijo01	1876	1	BSN	NL	1B	3			37	0	5	0
morrijo01	1876	1	BSN	NL	2B	37			105	117	37	18
morrijo01	1876	1	BSN	NL	C	23			90	43	31	3	24
morrijo01	1876	1	BSN	NL	OF	5			6	0	5	0
mullejo01	1876	1	PHN	NL	C	1			3	2	2	0	2
murnati01	1876	1	BSN	NL	1B	65			689	5	55	30
murnati01	1876	1	BSN	NL	2B	1			1	2	0	0
murnati01	1876	1	BSN	NL	OF	3			7	2	1	0
nichoal01	1876	1	NY3	NL	3B	57			123	135	73	1
nichotr01	1876	1	BSN	NL	P	1			0	2	0	0
orourji01	1876	1	BSN	NL	1B	2			16	0	1	0
orourji01	1876	1	BSN	NL	C	1			0	0	0	0	1
orourji01	1876	1	BSN	NL	OF	68			154	7	27	1
parksbi01	1876	1	BSN	NL	OF	1			3	0	1	0
paullo01	1876	1	PHN	NL	C	3			5	4	5	0	9
pearcdi01	1876	1	SL3	NL	2B	1			2	1	2	0
pearcdi01	1876	1	SL3	NL	OF	1			2	0	0	0
pearcdi01	1876	1	SL3	NL	SS	23			23	87	12	6
pearcfr01	1876	1	LS1	NL	P	1			0	0	0	0
peterjo01	1876	1	CHN	NL	P	1			0	0	0	0
peterjo01	1876	1	CHN	NL	SS	66			95	193	21	16
phelpne01	1876	1	NY3	NL	OF	1			2	0	1	0
phelpne01	1876	2	PHN	NL	C	1			3	1	3	0	7
piersda01	1876	1	CN1	NL	2B	1			1	2	0	1
piersda01	1876	1	CN1	NL	3B	1			0	0	0	0
piersda01	1876	1	CN1	NL	C	31			112	46	50	3	35
piersda01	1876	1	CN1	NL	OF	30			46	9	9	2
piersda01	1876	1	CN1	NL	P	1			0	0	0	0
piersda01	1876	1	CN1	NL	SS	1			0	1	0	0
pikeli01	1876	1	SL3	NL	2B	2			8	3	2	2
pikeli01	1876	1	SL3	NL	OF	62			82	13	11	5
remseja01	1876	1	HAR	NL	OF	69			177	12	24	5
rittewh01	1876	1	PHN	NL	3B	1			0	1	0	0
rittewh01	1876	1	PHN	NL	C	14			41	6	23	1	21
rittewh01	1876	1	PHN	NL	OF	4			2	1	0	0
ryanjo01	1876	1	LS1	NL	OF	64			131	1	17	1
ryanjo01	1876	1	LS1	NL	P	1			0	0	0	0
schafha01	1876	1	BSN	NL	3B	70			122	146	63	8
sewarge01	1876	1	NY3	NL	2B	1			2	3	0	0
shandji01	1876	1	NY3	NL	OF	2			3	0	2	0
snydepo01	1876	1	LS1	NL	C	55			249	86	67	2	25
snydepo01	1876	1	LS1	NL	OF	4			3	1	1	1
snydere01	1876	1	CN1	NL	OF	55			168	6	37	1
somered01	1876	1	LS1	NL	2B	64			210	251	69	22
spaldal01	1876	1	CHN	NL	1B	3			6	0	0	0
spaldal01	1876	1	CHN	NL	OF	10			7	2	3	0
spaldal01	1876	1	CHN	NL	P	61			45	92	7	7
spaldal01	1876	1	CHN	NL	SS	1			0	0	0	0
startjo01	1876	1	NY3	NL	1B	56			547	10	21	11
suttoez01	1876	1	PHN	NL	1B	29			324	11	31	6
suttoez01	1876	1	PHN	NL	2B	15			47	32	16	7
suttoez01	1876	1	PHN	NL	3B	8			11	8	9	0
suttoez01	1876	1	PHN	NL	OF	4			8	1	2	0
sweasch01	1876	1	CN1	NL	2B	55			167	158	51	30
sweasch01	1876	1	CN1	NL	OF	1			2	0	3	0
treacfr01	1876	1	NY3	NL	OF	57			202	9	39	1
treacpe01	1876	1	NY3	NL	SS	2			0	3	1	0
valenbo01	1876	1	NY3	NL	C	1			0	4	6	0	0
wardji01	1876	1	PHN	NL	C	1			5	1	2	0	5
warnefr01	1876	1	PHN	NL	OF	1			3	0	2	0
westbi01	1876	1	NY3	NL	2B	1			1	3	0	1
whitede01	1876	1	CHN	NL	1B	3			15	0	3	0
whitede01	1876	1	CHN	NL	3B	1			0	0	0	0
whitede01	1876	1	CHN	NL	C	63			295	50	64	3	29
whitede01	1876	1	CHN	NL	OF	3			8	0	2	0
whitede01	1876	1	CHN	NL	P	1			0	1	0	0
whitnfr01	1876	1	BSN	NL	2B	1			2	0	2	0
whitnfr01	1876	1	BSN	NL	OF	34			73	8	18	4
willida01	1876	1	CN1	NL	P	9			10	8	0	0
wrighge01	1876	1	BSN	NL	2B	2			7	2	1	0
wrighge01	1876	1	BSN	NL	P	1			0	0	0	0
wrighge01	1876	1	BSN	NL	SS	68			89	251	43	16
wrighha01	1876	1	BSN	NL	OF	1			0	0	0	0
wrighsa01	1876	1	BSN	NL	SS	2			1	6	2	0
yorkto01	1876	1	HAR	NL	OF	67			153	8	18	1
zettlge01	1876	1	PHN	NL	1B	7			62	2	5	4
zettlge01	1876	1	PHN	NL	2B	1			0	0	0	0
zettlge01	1876	1	PHN	NL	OF	1			1	1	1	0
zettlge01	1876	1	PHN	NL	P	28			7	36	5	2
addybo01	1877	1	CN1	NL	OF	57			74	17	22	5
allisdo01	1877	1	HAR	NL	C	29			127	36	19	4	16
ansonca01	1877	1	CHN	NL	3B	40			74	77	20	9
ansonca01	1877	1	CHN	NL	C	31			103	41	22	5	26
barnero01	1877	1	CHN	NL	2B	22			49	70	23	5
bassjo01	1877	1	HAR	NL	OF	1			0	0	0	0
battijo01	1877	1	SL3	NL	2B	21			54	59	24	4
battijo01	1877	1	SL3	NL	3B	32			58	77	29	6
battijo01	1877	1	SL3	NL	OF	5			4	0	2	0
battijo01	1877	1	SL3	NL	P	1			0	0	0	0
blongjo01	1877	1	SL3	NL	OF	40			60	6	13	0
blongjo01	1877	1	SL3	NL	P	25			13	24	5	0
bondto01	1877	1	BSN	NL	OF	3			1	0	0	0
bondto01	1877	1	BSN	NL	P	58			29	104	9	2
bootham01	1877	1	CN1	NL	2B	10			26	27	9	1
bootham01	1877	1	CN1	NL	3B	3			5	4	2	1
bootham01	1877	1	CN1	NL	C	12			25	16	12	2	11
bootham01	1877	1	CN1	NL	OF	1			0	0	1	0
bootham01	1877	1	CN1	NL	P	12			3	11	1	1
bootham01	1877	1	CN1	NL	SS	13			18	40	10	1
bradlge01	1877	1	CHN	NL	1B	3			12	0	0	0
bradlge01	1877	1	CHN	NL	3B	16			11	18	13	1
bradlge01	1877	1	CHN	NL	OF	1			0	0	0	0
bradlge01	1877	1	CHN	NL	P	50			25	71	5	1
brownle01	1877	1	BSN	NL	1B	4			27	0	0	0
brownle01	1877	1	BSN	NL	C	55			360	67	49	5	39
buncejo01	1877	1	HAR	NL	OF	1			1	0	0	0
burdoja01	1877	1	HAR	NL	2B	55			185	189	40	25
burdoja01	1877	1	HAR	NL	3B	3			5	12	4	0
careyto01	1877	1	HAR	NL	SS	60			49	203	53	11
cassijo01	1877	1	HAR	NL	OF	58			41	16	22	2
cassijo01	1877	1	HAR	NL	P	2			1	2	1	0
clappjo01	1877	1	SL3	NL	1B	1			9	1	0	0
clappjo01	1877	1	SL3	NL	C	53			269	44	40	2	45
clappjo01	1877	1	SL3	NL	OF	10			7	0	2	0
cravebi01	1877	1	LS1	NL	SS	57			71	175	26	15
croftar01	1877	1	SL3	NL	1B	28			290	7	9	10
croftar01	1877	1	SL3	NL	2B	1			2	2	1	0
croftar01	1877	1	SL3	NL	OF	25			48	3	13	0
crowlbi01	1877	1	LS1	NL	2B	1			1	1	0	0
crowlbi01	1877	1	LS1	NL	3B	1			1	1	2	0
crowlbi01	1877	1	LS1	NL	C	2			8	1	0	0	2
crowlbi01	1877	1	LS1	NL	OF	58			109	20	23	2
crowlbi01	1877	1	LS1	NL	SS	2			4	4	0	0
cummica01	1877	1	CN1	NL	OF	3			5	1	1	0
cummica01	1877	1	CN1	NL	P	19			6	31	3	0
cuthbne01	1877	1	CN1	NL	OF	12			34	5	8	2
dehlmhe01	1877	1	SL3	NL	1B	31			306	4	23	14
dehlmhe01	1877	1	SL3	NL	OF	1			3	0	0	0
devliji01	1877	1	LS1	NL	P	61			30	110	10	2
dorgami01	1877	1	SL3	NL	2B	1			0	0	0	0
dorgami01	1877	1	SL3	NL	3B	2			2	2	1	0
dorgami01	1877	1	SL3	NL	C	12			44	13	12	0	13
dorgami01	1877	1	SL3	NL	OF	50			70	5	16	3
dorgami01	1877	1	SL3	NL	SS	1			2	1	0	0
edench01	1877	1	CHN	NL	OF	15			17	2	9	1
eggleda01	1877	1	CHN	NL	OF	33			60	8	11	3
fergubo01	1877	1	HAR	NL	3B	56			109	155	50	6
fergubo01	1877	1	HAR	NL	P	3			4	4	1	0
fishech01	1877	1	CHN	NL	3B	1			0	2	1	0
foleywi01	1877	1	CN1	NL	3B	56			94	130	44	9
forceda01	1877	1	SL3	NL	3B	8			11	15	2	0
forceda01	1877	1	SL3	NL	SS	50			75	160	22	9
gerhajo01	1877	1	LS1	NL	1B	1			11	0	0	0
gerhajo01	1877	1	LS1	NL	2B	57			167	244	52	30
gerhajo01	1877	1	LS1	NL	OF	1			3	0	0	0
gerhajo01	1877	1	LS1	NL	SS	1			2	4	0	0
gleasja01	1877	1	SL3	NL	OF	1			0	0	0	0
glennjo01	1877	1	CHN	NL	1B	14			160	4	13	9
glennjo01	1877	1	CHN	NL	OF	36			66	7	4	1
gouldch01	1877	1	CN1	NL	1B	24			229	9	20	13
gouldch01	1877	1	CN1	NL	OF	1			2	0	0	0
haguebi01	1877	1	LS1	NL	3B	59			78	78	29	4
haldejo01	1877	1	LS1	NL	2B	1			0	4	3	0
hallge01	1877	1	LS1	NL	OF	61			92	7	11	1
halliji01	1877	1	CN1	NL	2B	16			52	36	15	8
halliji01	1877	2	CHN	NL	OF	19			27	1	7	1
harbibi01	1877	1	HAR	NL	2B	4			8	13	10	0
harbibi01	1877	1	HAR	NL	3B	1			0	0	0	0
harbibi01	1877	1	HAR	NL	C	32			143	27	23	2	22
harbibi01	1877	1	HAR	NL	OF	5			12	1	0	0
hastisc01	1877	1	CN1	NL	C	20			63	24	23	1	29
hastisc01	1877	1	CN1	NL	OF	1			0	0	0	0
hicksna01	1877	1	CN1	NL	C	8			31	15	7	3	6
hinespa01	1877	1	CHN	NL	2B	11			27	36	17	4
hinespa01	1877	1	CHN	NL	OF	49			75	4	19	1
holdsji01	1877	1	HAR	NL	OF	55			79	11	18	1
jonesch01	1877	1	CN1	NL	1B	10			100	3	9	4
jonesch01	1877	1	CN1	NL	OF	8			21	2	4	0
jonesch01	1877	2	CHN	NL	OF	2			5	1	0	0
jonesch01	1877	3	CN1	NL	OF	38			112	12	24	2
kesslhe01	1877	1	CN1	NL	1B	1			6	0	0	1
kesslhe01	1877	1	CN1	NL	C	5			7	8	15	1	8
laffefl01	1877	1	LS1	NL	OF	4			3	0	1	0
larkite01	1877	1	HAR	NL	2B	1			2	5	2	0
larkite01	1877	1	HAR	NL	3B	2			3	5	3	1
larkite01	1877	1	HAR	NL	P	56			26	89	15	0
lathaju01	1877	1	LS1	NL	1B	59			659	24	36	28
leele01	1877	1	SL3	NL	OF	4			6	0	3	0
leele01	1877	1	SL3	NL	SS	1			0	1	1	0
leonaan01	1877	1	BSN	NL	OF	37			79	5	12	2
leonaan01	1877	1	BSN	NL	SS	21			28	48	12	3
littlha01	1877	1	SL3	NL	OF	3			6	0	0	0
littlha01	1877	2	LS1	NL	2B	1			1	5	1	0
loftuto01	1877	1	SL3	NL	OF	3			4	3	2	0
malonjo01	1877	1	HAR	NL	OF	1			1	0	3	0
mannija01	1877	1	CN1	NL	1B	17			173	5	7	4
mannija01	1877	1	CN1	NL	2B	2			9	4	4	1
mannija01	1877	1	CN1	NL	OF	12			20	2	5	0
mannija01	1877	1	CN1	NL	P	10			1	11	3	1
mannija01	1877	1	CN1	NL	SS	26			30	62	32	2
mathebo01	1877	1	CN1	NL	OF	1			0	0	0	0
mathebo01	1877	1	CN1	NL	P	15			7	18	4	0
mathebo01	1877	1	CN1	NL	SS	1			1	1	3	0
mcgeami01	1877	1	SL3	NL	2B	39			125	140	35	12
mcgeami01	1877	1	SL3	NL	3B	19			39	41	7	0
mckenpa01	1877	1	SL3	NL	OF	1			1	0	0	0
mcveyca01	1877	1	CHN	NL	1B	1			17	0	1	0
mcveyca01	1877	1	CHN	NL	2B	1			1	4	0	1
mcveyca01	1877	1	CHN	NL	3B	17			18	23	8	0
mcveyca01	1877	1	CHN	NL	C	40			137	34	28	3	48
mcveyca01	1877	1	CHN	NL	P	17			6	14	5	0
meyerle01	1877	1	CN1	NL	2B	12			28	38	8	1
meyerle01	1877	1	CN1	NL	OF	1			1	0	0	0
meyerle01	1877	1	CN1	NL	SS	18			26	48	16	4
millege01	1877	1	CN1	NL	C	11			56	11	6	0	10
mitchbo01	1877	1	CN1	NL	OF	2			1	0	0	0
mitchbo01	1877	1	CN1	NL	P	12			9	14	2	0
morrijo01	1877	1	BSN	NL	1B	18			170	8	13	11
morrijo01	1877	1	BSN	NL	2B	3			10	9	6	2
morrijo01	1877	1	BSN	NL	3B	30			33	43	12	1
morrijo01	1877	1	BSN	NL	OF	11			10	1	7	0
murnati01	1877	1	BSN	NL	1B	5			39	4	3	1
murnati01	1877	1	BSN	NL	OF	30			39	5	10	2
newelte01	1877	1	SL3	NL	SS	1			2	3	1	0
nichoal01	1877	1	LS1	NL	1B	1			5	0	0	0
nichoal01	1877	1	LS1	NL	2B	3			3	9	5	0
nichoal01	1877	1	LS1	NL	3B	1			2	6	0	0
nichoal01	1877	1	LS1	NL	SS	1			2	7	0	2
nichotr01	1877	1	SL3	NL	OF	16			18	0	4	0
nichotr01	1877	1	SL3	NL	P	42			14	62	4	1
orourji01	1877	1	BSN	NL	1B	1			6	0	1	2
orourji01	1877	1	BSN	NL	OF	60			112	9	22	0
pearcdi01	1877	1	SL3	NL	SS	8			7	31	2	3
peterjo01	1877	1	CHN	NL	SS	60			124	215	45	23
pikeja01	1877	1	HAR	NL	OF	1			0	0	1	0
pikeli01	1877	1	CN1	NL	2B	22			62	57	23	5
pikeli01	1877	1	CN1	NL	OF	38			79	10	22	1
pikeli01	1877	1	CN1	NL	SS	2			3	8	6	1
quinnpa02	1877	1	CHN	NL	OF	4			7	1	4	0
redmobi01	1877	1	CN1	NL	SS	3			6	14	4	0
reisla01	1877	1	CHN	NL	P	4			1	4	0	0
remseja01	1877	1	SL3	NL	OF	33			73	4	8	0
roweda01	1877	1	CHN	NL	OF	2			2	0	1	0
roweda01	1877	1	CHN	NL	P	1			0	0	0	0
ryanjo01	1877	1	CN1	NL	OF	6			10	0	3	0
schafha01	1877	1	BSN	NL	3B	9			16	5	5	1
schafha01	1877	1	BSN	NL	OF	23			17	1	11	0
schafha01	1877	1	BSN	NL	SS	1			1	2	1	0
shaffor01	1877	1	LS1	NL	1B	1			12	0	0	0
shaffor01	1877	1	LS1	NL	OF	60			121	21	28	1
smithha01	1877	1	CHN	NL	2B	14			32	32	11	2
smithha01	1877	1	CHN	NL	OF	10			15	0	7	0
smithha01	1877	2	CN1	NL	2B	3			5	3	3	0
smithha01	1877	2	CN1	NL	C	8			45	13	8	1	17
smithha01	1877	2	CN1	NL	OF	3			3	0	0	0
snydepo01	1877	1	LS1	NL	C	61			292	102	39	8	58
snydepo01	1877	1	LS1	NL	OF	1			0	0	0	0
snydepo01	1877	1	LS1	NL	SS	1			0	1	1	0
spaldal01	1877	1	CHN	NL	1B	45			472	21	21	23
spaldal01	1877	1	CHN	NL	2B	13			37	50	8	6
spaldal01	1877	1	CHN	NL	3B	2			0	5	3	0
spaldal01	1877	1	CHN	NL	P	4			2	6	1	0
startjo01	1877	1	HAR	NL	1B	60			704	10	27	25
sullich01	1877	1	CN1	NL	1B	8			66	1	4	1
suttoez01	1877	1	BSN	NL	3B	22			38	31	15	2
suttoez01	1877	1	BSN	NL	SS	36			66	91	21	8
tayloli01	1877	1	HAR	NL	OF	2			2	0	0	0
waittch01	1877	1	CHN	NL	OF	10			20	3	6	1
whitede01	1877	1	BSN	NL	1B	35			324	13	13	16
whitede01	1877	1	BSN	NL	C	7			39	5	9	0	9
whitede01	1877	1	BSN	NL	OF	19			21	4	2	0
whitewi01	1877	1	BSN	NL	P	3			3	1	1	0
wrighge01	1877	1	BSN	NL	2B	58			171	209	53	28
wrighge01	1877	1	BSN	NL	SS	3			4	8	2	1
wrighha01	1877	1	BSN	NL	OF	1			1	1	1	1
yorkto01	1877	1	HAR	NL	OF	56			130	5	21	1
allisdo01	1878	1	PRO	NL	C	19			96	27	12	1	20
allisdo01	1878	1	PRO	NL	P	1			0	0	0	0
ansonca01	1878	1	CHN	NL	2B	9			22	26	7	4
ansonca01	1878	1	CHN	NL	3B	3			0	5	3	0
ansonca01	1878	1	CHN	NL	C	3			13	5	1	3	11
ansonca01	1878	1	CHN	NL	OF	48			60	6	14	0
bennech01	1878	1	ML2	NL	C	35			176	31	42	4	25
bennech01	1878	1	ML2	NL	OF	20			21	2	9	0
blissfr01	1878	1	ML2	NL	3B	1			2	2	0	0
blissfr01	1878	1	ML2	NL	C	1			7	1	1	0	6
bondto01	1878	1	BSN	NL	OF	2			0	0	0	0
bondto01	1878	1	BSN	NL	P	59			27	117	9	4
brownle01	1878	1	PRO	NL	1B	15			178	3	11	7
brownle01	1878	1	PRO	NL	C	45			232	84	43	11	55
brownle01	1878	1	PRO	NL	OF	1			0	0	0	0
brownle01	1878	1	PRO	NL	P	1			0	1	0	0
burdoja01	1878	1	BSN	NL	2B	60			245	212	41	34
careyto01	1878	1	PRO	NL	SS	61			56	207	38	8
cassijo01	1878	1	CHN	NL	C	1			2	1	0	0	5
cassijo01	1878	1	CHN	NL	OF	60			89	30	28	6
clappjo01	1878	1	IN1	NL	1B	12			143	2	5	6
clappjo01	1878	1	IN1	NL	2B	1			1	7	2	0
clappjo01	1878	1	IN1	NL	C	9			29	11	3	0	10
clappjo01	1878	1	IN1	NL	OF	44			60	5	8	0
clappjo01	1878	1	IN1	NL	SS	3			1	8	3	0
coreyfr01	1878	1	PRO	NL	1B	1			8	0	0	1
coreyfr01	1878	1	PRO	NL	2B	2			2	9	1	0
coreyfr01	1878	1	PRO	NL	P	5			1	2	0	0
creamge01	1878	1	ML2	NL	2B	28			53	103	30	5
creamge01	1878	1	ML2	NL	3B	6			8	10	2	2
creamge01	1878	1	ML2	NL	OF	17			21	4	5	0
croftar01	1878	1	IN1	NL	1B	51			534	8	21	19
croftar01	1878	1	IN1	NL	OF	9			18	1	4	0
dalryab01	1878	1	ML2	NL	OF	61			128	11	28	3
dickebu01	1878	1	CN1	NL	OF	29			56	1	8	0
ellicjo01	1878	1	ML2	NL	3B	1			1	0	0	0
ellicjo01	1878	1	ML2	NL	C	2			7	3	3	1	11
ellicjo01	1878	1	ML2	NL	P	1			0	0	0	0
fergubo01	1878	1	CHN	NL	2B	4			13	10	4	0
fergubo01	1878	1	CHN	NL	C	1			7	2	2	0	9
fergubo01	1878	1	CHN	NL	SS	57			71	226	40	17
fishech01	1878	1	PRO	NL	P	1			2	1	0	0
flintsi01	1878	1	IN1	NL	C	59			285	102	39	7	55
flintsi01	1878	1	IN1	NL	OF	9			11	0	5	0
foleywi01	1878	1	ML2	NL	3B	53			68	87	36	8
foleywi01	1878	1	ML2	NL	C	7			33	16	3	0	20
geerbi01	1878	1	CN1	NL	2B	2			4	5	2	0
geerbi01	1878	1	CN1	NL	SS	60			58	177	36	15
gerhajo01	1878	1	CN1	NL	2B	60			159	206	38	26
goldemi01	1878	1	ML2	NL	1B	1			18	0	2	0
goldemi01	1878	1	ML2	NL	OF	39			50	9	12	2
goldemi01	1878	1	ML2	NL	P	22			7	36	8	0
goodmja01	1878	1	ML2	NL	1B	60			693	12	42	15
haguebi01	1878	1	PRO	NL	3B	62			81	177	21	5
halliji01	1878	1	CHN	NL	2B	5			12	12	8	1
halliji01	1878	1	CHN	NL	OF	11			13	2	4	0
[truncated: 134,816 more rows]
