# Supplementary material for: Ten quick tips for getting the most scientific value out of numerical data
Source: PLoS Comput Biol. 2018 Oct 11;14(10):e1006141. doi: 10.1371/journal.pcbi.1006141 (PMC6181270; doi:10.1371/journal.pcbi.1006141)
Supplement: S3 Data — This archive contains selected tables of the Lahman Baseball Database [41] (in comma-separated values format) by Sean Lahman, licensed under a Creative Commons Attribution-ShareAlike 3.0 Unported License [42], and our Python code implementing the calculations described in Supporting Information S1 Text. (TGZ) [file pcbi.1006141.s004.tgz › pValueHackingExample/data/People.csv]

playerID	birthYear	birthMonth	birthDay	birthCountry	birthState	birthCity	deathYear	deathMonth	deathDay	deathCountry	deathState	deathCity	nameFirst	nameLast	nameGiven	weight	height	bats	throws	debut	finalGame	retroID	bbrefID
aardsda01	1981	12	27	USA	CO	Denver							David	Aardsma	David Allan	215	75	R	R	2004-04-06	2015-08-23	aardd001	aardsda01
aaronha01	1934	2	5	USA	AL	Mobile							Hank	Aaron	Henry Louis	180	72	R	R	1954-04-13	1976-10-03	aaroh101	aaronha01
aaronto01	1939	8	5	USA	AL	Mobile	1984	8	16	USA	GA	Atlanta	Tommie	Aaron	Tommie Lee	190	75	R	R	1962-04-10	1971-09-26	aarot101	aaronto01
aasedo01	1954	9	8	USA	CA	Orange							Don	Aase	Donald William	190	75	R	R	1977-07-26	1990-10-03	aased001	aasedo01
abadan01	1972	8	25	USA	FL	Palm Beach							Andy	Abad	Fausto Andres	184	73	L	L	2001-09-10	2006-04-13	abada001	abadan01
abadfe01	1985	12	17	D.R.	La Romana	La Romana							Fernando	Abad	Fernando Antonio	220	73	L	L	2010-07-28	2017-06-13	abadf001	abadfe01
abadijo01	1850	11	4	USA	PA	Philadelphia	1905	5	17	USA	NJ	Pemberton	John	Abadie	John W.	192	72	R	R	1875-04-26	1875-06-10	abadj101	abadijo01
abbated01	1877	4	15	USA	PA	Latrobe	1957	1	6	USA	FL	Fort Lauderdale	Ed	Abbaticchio	Edward James	170	71	R	R	1897-09-04	1910-09-15	abbae101	abbated01
abbeybe01	1869	11	11	USA	VT	Essex	1962	6	11	USA	VT	Colchester	Bert	Abbey	Bert Wood	175	71	R	R	1892-06-14	1896-09-23	abbeb101	abbeybe01
abbeych01	1866	10	14	USA	NE	Falls City	1926	4	27	USA	CA	San Francisco	Charlie	Abbey	Charles S.	169	68	L	L	1893-08-16	1897-08-19	abbec101	abbeych01
abbotda01	1862	3	16	USA	OH	Portage	1930	2	13	USA	MI	Ottawa Lake	Dan	Abbott	Leander Franklin	190	71	R	R	1890-04-19	1890-05-23	abbod101	abbotda01
abbotfr01	1874	10	22	USA	OH	Versailles	1935	6	11	USA	CA	Los Angeles	Fred	Abbott	Harry Frederick	180	70	R	R	1903-04-25	1905-09-20	abbof101	abbotfr01
abbotgl01	1951	2	16	USA	AR	Little Rock							Glenn	Abbott	William Glenn	200	78	R	R	1973-07-29	1984-08-08	abbog001	abbotgl01
abbotje01	1972	8	17	USA	GA	Atlanta							Jeff	Abbott	Jeffrey William	190	74	R	L	1997-06-10	2001-09-29	abboj002	abbotje01
abbotji01	1967	9	19	USA	MI	Flint							Jim	Abbott	James Anthony	200	75	L	L	1989-04-08	1999-07-21	abboj001	abbotji01
abbotku01	1969	6	2	USA	OH	Zanesville							Kurt	Abbott	Kurt Thomas	180	71	R	R	1993-09-07	2001-04-13	abbok002	abbotku01
abbotky01	1968	2	18	USA	MA	Newburyport							Kyle	Abbott	Lawrence Kyle	200	76	L	L	1991-09-10	1996-08-24	abbok001	abbotky01
abbotod01	1886	9	5	USA	PA	New Eagle	1933	4	13	USA	DC	Washington	Ody	Abbott	Ody Cleon	165	69	L	R	1910-09-10	1910-10-15	abboo101	abbotod01
abbotpa01	1967	9	15	USA	CA	Van Nuys							Paul	Abbott	Paul David	185	75	R	R	1990-08-21	2004-08-07	abbop001	abbotpa01
aberal01	1927	7	31	USA	OH	Cleveland	1993	5	20	USA	OH	Garfield Heights	Al	Aber	Albert Julius	195	74	L	L	1950-09-15	1957-09-11	abera101	aberal01
abercda01	1850	1	2	USA	OK	Fort Towson	1939	11	11	USA	PA	Philadelphia	Frank	Abercrombie	Francis Patterson					1871-10-21	1871-10-21	aberd101	abercda01
abercre01	1980	7	15	USA	GA	Columbus							Reggie	Abercrombie	Reginald Damascus	215	75	R	R	2006-04-04	2008-09-28	aberr001	abercre01
abernbi01	1929	1	30	USA	CA	Torrance	2006	2	19	USA	CA	Yucaipa	Bill	Abernathie	William Edward	190	70	R	R	1952-09-27	1952-09-27	aberb101	abernbi01
abernbr01	1977	9	23	USA	GA	Atlanta							Brent	Abernathy	Michael Brent	185	73	R	R	2001-06-25	2005-09-29	aberb001	abernbr01
abernte01	1921	10	30	USA	NC	Bynum	2001	11	16	USA	NC	Charlotte	Ted	Abernathy	Talmadge Lafayette	210	74	R	L	1942-09-19	1944-04-29	abert102	abernte01
abernte02	1933	3	6	USA	NC	Stanley	2004	12	16	USA	NC	Gastonia	Ted	Abernathy	Theodore Wade	215	76	R	R	1955-04-13	1972-09-30	abert101	abernte02
abernwo01	1915	2	1	USA	NC	Forest City	1994	12	5	USA	KY	Louisville	Woody	Abernathy	Virgil Woodrow	170	72	L	L	1946-07-28	1947-04-17	aberw101	abernwo01
aberscl01	1921	8	28	USA	IL	Chicago	1973	6	23	USA	CA	Vallejo	Cliff	Aberson	Clifford Alexander	200	72	R	R	1947-07-18	1949-05-09	aberc101	aberscl01
ablesha01	1883	10	4	USA	TX	Terrell	1951	2	8	USA	TX	San Antonio	Harry	Ables	Harry Terrell	200	74	R	L	1905-09-04	1911-05-05	ableh101	ablesha01
abnersh01	1966	6	17	USA	OH	Hamilton							Shawn	Abner	Shawn Wesley	190	73	R	R	1987-09-08	1992-10-03	abnes001	abnersh01
abramca01	1924	3	2	USA	PA	Philadelphia	1997	2	25	USA	FL	Fort Lauderdale	Cal	Abrams	Calvin Ross	185	72	L	L	1949-04-19	1956-05-09	abrac101	abramca01
abramge01	1899	11	9	USA	WA	Seattle	1986	12	5	USA	FL	Clearwater	George	Abrams	George Allen	170	69	R	R	1923-04-19	1923-05-04	abrag101	abramge01
abregjo01	1962	7	4	USA	TX	Corpus Christi							Johnny	Abrego	Johnny Ray	185	72	R	R	1985-09-04	1985-10-03	abrej001	abregjo01
abreubo01	1974	3	11	Venezuela	Aragua	Maracay							Bobby	Abreu	Bob Kelly	220	72	L	R	1996-09-01	2014-09-28	abreb001	abreubo01
abreujo01	1913	5	24	USA	CA	Oakland	1993	3	17	USA	CA	Hayward	Joe	Abreu	Joseph Lawrence	160	68	R	R	1942-04-23	1942-07-11	abrej101	abreujo01
abreujo02	1987	1	29	Cuba	Cienfuegos	Cienfuegos							Jose	Abreu	Jose Dariel	255	75	R	R	2014-03-31	2017-06-16	abrej003	abreujo02
abreuju01	1985	4	8	D.R.	Duarte	San Francisco de Macoris							Juan	Abreu	Juan de Dios	185	72	R	R	2011-08-29	2011-09-27	abrej002	abreuju01
abreuto01	1984	11	13	D.R.	Puerto Plata	Puerto Plata							Tony	Abreu	Etanislao Toni	200	70	B	R	2007-05-22	2014-07-28	abret001	abreuto01
abreuwi01	1977	4	5	D.R.	Sanchez Ramirez	Cotui							Winston	Abreu	Winston Leonardo	170	74	R	R	2006-08-06	2009-07-25	abrew001	abreuwi01
abstebi01	1883	2	2	USA	MO	St. Louis	1940	4	8	USA	MO	St. Louis	Bill	Abstein	William Henry	185	72	R	R	1906-09-25	1910-06-02	abstb101	abstebi01
accarje01	1981	12	18	USA	AZ	Phoenix							Jeremy	Accardo	Jeremiah Lee	195	72	R	R	2005-05-04	2012-09-27	accaj001	accarje01
aceveal01	1982	12	8	Mexico	Sonora	San Luis Rio Colorado							Alfredo	Aceves	Alfredo	205	74	R	R	2008-08-31	2014-06-02	aceva001	aceveal01
acevejo01	1977	12	18	D.R.	Distrito Nacional	Santo Domingo							Jose	Acevedo	Jose Omar	185	72	R	R	2001-06-19	2005-09-29	acevj002	acevejo01
aceveju01	1970	5	5	Mexico	Chihuahua	Ciudad Juarez							Juan	Acevedo	Juan Carlos	245	74	R	R	1995-04-30	2003-08-05	acevj001	aceveju01
achteaj01	1988	8	27	USA	OH	Toledo							A. J.	Achter	Adam Joseph	215	77	R	R	2014-09-03	2016-10-01	achta001	achteaj01
ackerji01	1958	9	24	USA	TX	Freer							Jim	Acker	James Justin	210	74	R	R	1983-04-07	1992-06-14	ackej001	ackerji01
ackerto01	1930	3	7	USA	NJ	Paterson							Tom	Acker	Thomas James	215	76	R	R	1956-04-20	1959-09-20	acket101	ackerto01
ackledu01	1988	2	26	USA	NC	Winston-Salem							Dustin	Ackley	Dustin Michael	205	73	L	R	2011-06-17	2016-05-29	ackld001	ackledu01
acklefr01	1937	4	10	USA	WI	Hayward	2002	5	22	USA	MN	Duluth	Fritz	Ackley	Florian Frederick	202	73	L	R	1963-09-21	1964-05-09	acklf101	acklefr01
acostcy01	1946	11	22	Mexico	Sinaloa	El Sabino							Cy	Acosta	Cecilio	165	70	R	R	1972-06-04	1975-05-05	acosc101	acostcy01
acosted01	1944	3	9	Panama	Chiriqui	Boquete							Ed	Acosta	Eduardo Elixbet	215	77	B	R	1970-09-07	1972-10-04	acose101	acosted01
acostjo01	1891	3	4	Cuba	La Habana	La Habana	1977	11	16	Cuba	La Habana	La Habana	Jose	Acosta	Jose	134	66	R	R	1920-07-28	1922-05-12	acosj101	acostjo01
acostma01	1981	5	1	Panama	Colon	Colon							Manny	Acosta	Manuel Alcides	215	76	R	R	2007-08-12	2012-10-03	acosm001	acostma01
acostme01	1896	5	19	Cuba		Bauta	1963	11	17	USA	FL	Miami	Merito	Acosta	Baldomero Pedro	140	67	L	L	1913-06-15	1918-09-02	acosm101	acostme01
acrema01	1968	9	16	USA	CA	Concord							Mark	Acre	Mark Robert	235	80	R	R	1994-05-13	1997-05-10	acrem001	acrema01
actama99	1969	1	11	D.R.	San Pedro de Macoris	San Pedro de Macoris							Manny	Acta	Manuel Elias	172	74	R	R			actam801	actama99
adairbi99	1913	2	10	USA	AL	Mobile	2002	6	17	USA	AL	Bay Minette	Bill	Adair	Marion Danne	168	72	R	R			adaib801	adairbi99
adairje01	1936	12	17	USA	OK	Sand Springs	1987	5	31	USA	OK	Tulsa	Jerry	Adair	Kenneth Jerry	175	72	R	R	1958-09-02	1970-05-03	adaij101	adairje01
adairji01	1907	1	25	USA	TX	Waxahachie	1982	12	9	USA	TX	Farmers Branch	Jimmy	Adair	James Audrey	154	70	R	R	1931-08-24	1931-09-07	adaij102	adairji01
adamecr01	1991	7	26	D.R.	Distrito Nacional	Santo Domingo							Cristhian	Adames	Cristhian Pascual	185	72	B	R	2014-07-29	2017-04-28	adamc001	adamecr01
adamsac01	1910	3	2	USA	CA	Willows	2006	2	26	USA	GA	Albany	Ace	Adams	Ace Townsend	182	70	R	R	1941-04-15	1946-04-24	adama101	adamsac01
adamsau01	1986	8	19	USA	AL	Montgomery							Austin	Adams	Austin David	200	71	R	R	2014-07-12	2016-09-27	adama001	adamsau01
adamsba01	1882	5	18	USA	IN	Tipton	1968	7	27	USA	MD	Silver Spring	Babe	Adams	Charles Benjamin	185	71	L	R	1906-04-18	1926-08-11	adamb104	adamsba01
adamsbe01	1891	6	21	USA	TX	Wharton	1940	6	24	USA	CA	Los Angeles	Bert	Adams	John Bertram	185	73	B	R	1910-08-30	1919-09-28	adamb106	adamsbe01
adamsbo01	1901	7	24	USA	MA	Holyoke	1996	10	17	USA	PA	Lemoyne	Bob	Adams	Robert Burnette	168	71	R	R	1925-09-22	1925-09-23	adamb107	adamsbo01
adamsbo02	1907	1	20	USA	AL	Birmingham	1970	3	6	USA	FL	Jacksonville	Bob	Adams	Robert Andrew	165	72	R	R	1931-09-27	1932-09-17	adamb102	adamsbo02
adamsbo03	1921	12	14	USA	CA	Tuolumne	1997	2	13	USA	WA	Gig Harbor	Bobby	Adams	Robert Henry	160	70	R	R	1946-04-16	1959-04-22	adamb103	adamsbo03
adamsbo04	1952	1	6	USA	PA	Pittsburgh							Bob	Adams	Robert Melvin	200	74	R	R	1977-07-10	1977-09-29	adamb105	adamsbo04
adamsbu01	1915	6	24	USA	CO	Trinidad	1990	9	1	USA	CA	Rancho Mirage	Buster	Adams	Elvin Clark	180	72	R	R	1939-04-27	1947-09-21	adamb101	adamsbu01
adamsda01	1887	6	19	USA	MO	St. Louis	1964	10	6	USA	MO	St. Louis	Dan	Adams	Daniel Leslie	165	71	R	R	1914-05-22	1915-09-26	adamd103	adamsda01
adamsda02	1987	5	15	USA	FL	Margate							David	Adams	David Lee	205	74	R	R	2013-05-15	2013-09-29	adamd001	adamsda02
adamsdi01	1920	4	8	USA	CA	Tuolumne	2016	9	14	USA	CA	Fallbrook	Dick	Adams	Richard Leroy	185	72	R	L	1947-05-20	1947-09-28	adamd102	adamsdi01
adamsdo01	1943	1	27	USA	WI	Blue River							Doug	Adams	Harold Douglas	185	75	L	R	1969-09-08	1969-10-01	adamd101	adamsdo01
adamsge01	1855	1	26	USA	MA	Worcester	1920	10	11	USA	WA	Clarkston	George	Adams	George Henry	175	66	R	R	1879-06-14	1879-06-21	adamg102	adamsge01
adamsgl01	1947	10	4	USA	MA	Northbridge							Glenn	Adams	Glenn Charles	180	73	L	R	1975-05-04	1982-10-03	adamg101	adamsgl01
adamshe01	1928	4	14	USA	CA	Hollywood	2012	2	1	USA	OK	Tulsa	Herb	Adams	Herbert Loren	160	69	L	L	1948-09-17	1950-08-30	adamh101	adamshe01
adamsji01	1868			USA	IL	East St. Louis							Jim	Adams	James J.	148	66		R	1890-04-21	1890-04-21	adamj101	adamsji01
adamsjo01	1877	10	28	USA	IL	Cowden	1952	10	8	USA	MO	Bachelor	Joe	Adams	Joseph Edward	190	72	R	L	1902-04-26	1902-04-26	adamj102	adamsjo01
adamsjo02	1971	7	2	USA	CA	Lakewood							Joel	Adamson	Joel Lee	185	76	L	L	1996-04-10	1998-04-26	adamj001	adamsjo02
adamska01	1891	8	11	USA	GA	Columbus	1967	9	17	USA	WA	Everett	Karl	Adams	Karl Tutwiler	170	74	R	R	1914-04-19	1915-09-23	adamk101	adamska01
adamsla01	1989	11	13	USA	OK	Talihina							Lane	Adams	Lane Weston	220	75	R	R	2014-09-01	2017-06-16	adaml001	adamsla01
adamsma01	1988	8	31	USA	PA	Philipsburg							Matt	Adams	Matthew James	260	75	L	R	2012-05-20	2017-06-16	adamm002	adamsma01
adamsmi01	1947	9	13	USA	CA	San Diego							Mike	Adamson	John Michael	185	74	R	R	1967-07-01	1969-05-07	adamm101	adamsmi01
adamsmi02	1948	7	24	USA	OH	Cincinnati							Mike	Adams	Robert Michael	180	69	R	R	1972-09-10	1978-07-25	adamm102	adamsmi02
adamsmi03	1978	7	29	USA	TX	Corpus Christi							Mike	Adams	Jon Michael	210	77	R	R	2004-05-18	2014-09-18	adamm001	adamsmi03
adamsre01	1921	10	7	USA	CA	Parlier	2017	1	18	USA	CA	Fresno	Red	Adams	Charles Dwight	185	72	R	R	1946-05-05	1946-07-02	adamr101	adamsre01
adamsri01	1878	12	24	USA	TX	Paris	1955	3	10	USA	TX	Paris	Rick	Adams	Reuben Alexander	165	72	L	L	1905-07-13	1905-09-29	adamr102	adamsri01
adamsri02	1959	1	21	USA	CA	Upland	2011	10	28	USA	CA	Rancho Cucamonga	Ricky	Adams	Ricky Lee	180	74	R	R	1982-09-15	1985-10-05	adamr001	adamsri02
adamsru01	1980	8	30	USA	NC	Laurinburg							Russ	Adams	Russ Moore	205	72	L	R	2004-09-03	2009-06-30	adamr002	adamsru01
adamsry01	1987	4	21	USA	LA	New Orleans							Ryan	Adams	Ryan Scott	185	71	R	R	2011-05-20	2011-09-19	adamr003	adamsry01
adamssp01	1894	8	26	USA	PA	Zerbe	1989	2	24	USA	PA	Pottsville	Sparky	Adams	Earl John	151	65	R	R	1922-09-18	1934-09-30	adams101	adamssp01
adamssp02	1898	6	21	USA	UT	Layton	1970	11	24	USA	UT	Salt Lake City	Spencer	Adams	Spencer Dewey	158	69	L	R	1923-04-22	1927-10-02	adams102	adamssp02
adamste01	1973	3	6	USA	AL	Mobile							Terry	Adams	Terry Wayne	180	75	R	R	1995-08-10	2005-05-23	adamt001	adamste01
adamswi01	1890	9	27	USA	PA	Clearfield	1937	6	18	USA	NY	Albany	Willie	Adams	James Irvin	180	76	R	R	1912-06-30	1919-09-06	adamw101	adamswi01
adamswi02	1972	10	8	USA	NM	Gallup							Willie	Adams	William Edward	215	79	R	R	1996-06-11	1997-08-14	adamw001	adamswi02
adcocjo01	1927	10	30	USA	LA	Coushatta	1999	5	3	USA	LA	Coushatta	Joe	Adcock	Joseph Wilbur	210	76	R	R	1950-04-23	1966-10-01	adcoj101	adcocjo01
adcocna01	1988	2	25	USA	KY	Elizabethtown							Nathan	Adcock	Nathan Masler	235	76	R	R	2011-03-31	2015-07-26	adcon001	adcocna01
addisbo01	1925	11	6	USA	OH	Mineral	2016	11	15	USA	OH	Mentor	Bob	Addis	Robert Gordon	175	72	L	R	1950-09-01	1953-06-12	addib101	addisbo01
adducji01	1959	8	9	USA	IL	Chicago							Jim	Adduci	James David	200	77	L	L	1983-09-12	1989-07-26	adduj001	adducji01
adducji02	1985	5	15	CAN	BC	Burnaby							Jim	Adduci	Jim Charles	210	74	L	L	2013-09-01	2017-05-10	adduj002	adducji02
addybo01	1842	2		CAN	ON	Port Hope	1910	4	9	USA	ID	Pocatello	Bob	Addy	Robert Edward	160	68	L	L	1871-05-06	1877-10-06	addyb101	addybo01
adenhni01	1986	8	24	USA	MD	Silver Spring	2009	4	9	USA	CA	Orange	Nick	Adenhart	Nicholas James	185	75	R	R	2008-05-01	2009-04-08	adenn001	adenhni01
aderhmo01	1915	9	13	USA	NC	Mount Olive	1955	3	18	USA	FL	Sarasota	Morrie	Aderholt	Morris Woodrow	188	73	L	R	1939-09-13	1945-09-30	aderm101	aderhmo01
adkinde01	1918	5	11	USA	KS	Norcatur	1998	12	26	USA	CA	Santa Monica	Dewey	Adkins	John Dewey	195	74	R	R	1942-09-19	1949-10-02	adkid103	adkinde01
adkindi01	1920	3	3	USA	TX	Electra	1955	9	12	USA	TX	Electra	Dick	Adkins	Richard Earl	165	70	R	R	1942-09-19	1942-09-20	adkid101	adkindi01
adkindo01	1872	8	5	USA	WI	Troy	1934	2	21	USA	NC	Durham	Doc	Adkins	Merle Theron	220	70	R	R	1902-06-24	1903-09-29	adkid102	adkindo01
adkingr01	1897	6	29	USA	AR	Jacksonville	1966	3	31	USA	AR	Little Rock	Grady	Adkins	Grady Emmett	175	71	R	R	1928-04-13	1929-10-05	adkig101	adkingr01
adkinhe01	1874	1	19	USA	MO	Fulton	1953	1	2	USA	MO	Mexico	Harry	Atkinson	John Harry					1895-09-25	1895-09-25	adkih101	adkinhe01
adkinjo01	1977	8	30	USA	WV	Huntington							Jon	Adkins	Jonathan Scott	200	72	L	R	2003-08-14	2008-09-27	adkij001	adkinjo01
adkinst01	1964	10	26	USA	IL	Chicago							Steve	Adkins	Steven Thomas	210	78	R	L	1990-09-12	1990-10-03	adkis001	adkinst01
adlemti01	1987	11	13	USA	NY	Staten Island							Tim	Adleman	Timothy Max	225	77	R	R	2016-05-01	2017-06-16	adlet001	adlemti01
adlesda01	1943	7	15	USA	CA	Long Beach	2016	2	15	USA	CA	Long Beach	Dave	Adlesh	David George	187	72	R	R	1963-05-12	1968-09-28	adled101	adlesda01
adriaeh01	1989	8	21	Venezuela	Miranda	Guarenas							Ehire	Adrianza	Ehire Enrique	170	73	B	R	2013-09-08	2017-06-16	adrie001	adriaeh01
afenitr01	1963	9	21	USA	CA	Escondido							Troy	Afenir	Michael Troy	185	76	R	R	1987-09-14	1992-07-10	afent001	afenitr01
affelje01	1979	6	6	USA	AZ	Phoenix							Jeremy	Affeldt	Jeremy David	225	76	L	L	2002-04-06	2015-10-04	affej001	affelje01
agbaybe01	1971	12	28	USA	HI	Honolulu							Benny	Agbayani	Benny Peter	225	72	R	R	1998-06-17	2002-09-29	agbab001	agbaybe01
ageeto01	1942	8	9	USA	AL	Magnolia	2001	1	22	USA	NY	New York	Tommie	Agee	Tommie Lee	195	71	R	R	1962-09-14	1973-09-30	ageet101	ageeto01
agganha01	1929	4	20	USA	MA	Lynn	1955	6	27	USA	MA	Cambridge	Harry	Agganis	Harry	200	74	L	L	1954-04-13	1955-06-02	aggah101	agganha01
aglerjo01	1887	6	12	USA	OH	Coshocton	1971	4	26	USA	OH	Massillon	Joe	Agler	Joseph Abram	165	71	L	L	1912-10-01	1915-10-02	aglej101	aglerjo01
agnewsa01	1887	4	12	USA	MO	Farmington	1951	7	19	USA	CA	Sonoma	Sam	Agnew	Samuel Lester	185	71	R	R	1913-04-10	1919-09-28	agnes101	agnewsa01
agostju01	1958	2	23	P.R.		Rio Piedras							Juan	Agosto	Juan Roberto	190	74	L	L	1981-09-07	1993-06-19	agosj001	agostju01
aguaylu01	1959	3	13	P.R.		Vega Baja							Luis	Aguayo	Luis	173	69	R	R	1980-04-19	1989-09-30	agual001	aguaylu01
aguilch01	1979	2	23	USA	CA	Redwood City							Chris	Aguila	Christopher Louis	200	71	R	R	2004-06-28	2008-07-10	aguic001	aguilch01
aguilje01	1990	6	30	Venezuela	Aragua	Maracay							Jesus	Aguilar	Jesus Alexander	250	75	R	R	2014-05-15	2017-06-16	aguij001	aguilje01
aguilri01	1961	12	31	USA	CA	San Gabriel							Rick	Aguilera	Richard Warren	195	76	R	R	1985-06-12	2000-09-06	aguir001	aguilri01
aguirha01	1931	1	31	USA	CA	Azusa	1994	9	5	USA	MI	Bloomfield Hills	Hank	Aguirre	Henry John	205	76	R	L	1955-09-10	1970-06-24	aguih101	aguirha01
ahearch01	1858			USA	NY	Troy	1919	4	28	USA	NY	Troy	Bill	Ahearn	William H.					1880-06-19	1880-06-19	aheac101	ahearch01
ahearpa01	1969	12	10	USA	CA	San Francisco							Pat	Ahearne	Patrick Howard	195	75	R	R	1995-06-14	1995-06-30	aheap001	ahearpa01
ahmedni01	1990	3	15	USA	MA	Springfield							Nick	Ahmed	Nicholas Mark	195	74	R	R	2014-06-29	2017-06-14	ahmen001	ahmedni01
aikenwi01	1954	10	14	USA	SC	Seneca							Willie	Aikens	Willie Mays	220	75	L	R	1977-05-17	1985-04-27	aikew001	aikenwi01
aingeda01	1959	3	17	USA	OR	Eugene							Danny	Ainge	Daniel Ray	175	76	R	R	1979-05-21	1981-09-22	aingd101	aingeda01
ainsmed01	1890	2	4	Russia			1981	9	6	USA	FL	Fort Lauderdale	Eddie	Ainsmith	Edward Wilbur	180	71	R	R	1910-08-09	1924-07-21	ainse101	ainsmed01
ainswku01	1978	9	9	USA	LA	Baton Rouge							Kurt	Ainsworth	Kurt Harold	192	75	R	R	2001-09-05	2004-05-14	ainsk001	ainswku01
aitchra01	1887	12	5	USA	SD	Tyndall	1958	9	26	USA	KS	Columbus	Raleigh	Aitchison	Raleigh Leonidas	175	71	R	L	1911-04-19	1915-06-20	aitcr101	aitchra01
aitonge01	1890	12	29	USA	KS	Kingman	1976	8	16	USA	CA	North Hollywood	George	Aiton	George Wilson	175	71	B	R	1912-06-29	1912-07-28	aitog101	aitonge01
akejo01	1861	8	29	USA	PA	Altoona	1887	5	11	USA	WI	La Crosse	John	Ake	John Leckie	180	73	R	R	1884-05-12	1884-07-15	ake-j101	akejo01
akerfda01	1962	6	12	USA	CO	Denver	2012	6	24	USA	AZ	Phoenix	Darrel	Akerfelds	Darrel Wayne	210	74	R	R	1986-08-01	1991-07-02	akerd001	akerfda01
akerja01	1940	7	13	USA	CA	Tulare							Jack	Aker	Jackie Delane	190	74	R	R	1964-05-03	1974-09-27	akerj102	akerja01
akersbi01	1904	12	25	USA	TN	Chattanooga	1962	4	13	USA	TN	Chattanooga	Bill	Akers	William G.	178	71	R	R	1929-09-08	1932-07-27	akerb101	akersbi01
akersje01	1887	11	1	USA	IN	Shelbyville	1979	5	15	USA	FL	Bay Pines	Jerry	Akers	Albert Earl	175	71	R	R	1912-05-04	1912-05-25	akerj101	akersje01
albagi01	1960	1	18	D.R.	Santiago	Santiago							Gibson	Alba	Gibson Alberto	160	74	L	L	1988-05-03	1988-05-08	albag001	albagi01
albaljo01	1982	10	30	P.R.		San Juan							Jonathan	Albaladejo	Jonathan	270	77	R	R	2007-09-05	2012-07-20	albaj001	albaljo01
albanjo01	1933	6	26	USA	NY	New York	2000	6	17	USA	NY	New York	Joe	Albanese	Joseph Peter	215	75	R	R	1958-07-18	1958-09-09	albaj101	albanjo01
alberan01	1985	10	6	CAN	SK	North Battleford							Andrew	Albers	Andrew William	200	73	R	L	2013-08-06	2016-09-23	albea001	alberan01
alberbu01	1950	5	4	USA	PA	Williamsport							Butch	Alberts	Francis Burt	205	74	R	R	1978-09-07	1978-09-28	albeb101	alberbu01
albercy01	1882	1	14	USA	MI	Grand Rapids	1917	8	27	USA	IN	Fort Wayne	Cy	Alberts	Frederick Joseph	230	72	R	R	1910-09-17	1910-10-12	albec101	albercy01
albergu01	1860	9		USA	PA	Reading	1912	5	7	USA	CO	Idaho Springs	Gus	Alberts	Augustus Peter	180	66	R	R	1884-05-01	1891-09-22	albeg101	albergu01
alberha01	1992	10	17	D.R.	Duarte	San Francisco de Macoris							Hanser	Alberto	Hanser Joel	215	71	R	R	2015-05-29	2016-10-02	albeh001	alberha01
alberjo01	1969	6	29	P.R.		San Juan							Jose	Alberro	Jose Edgardo	190	74	R	R	1995-04-27	1997-08-05	albej001	alberjo01
alberma01	1983	1	20	USA	TX	Houston							Matt	Albers	Matthew James	225	73	L	R	2006-07-25	2017-06-12	albem001	alberma01
albosed01	1918	10	27	USA	MI	Saginaw	2003	1	7	USA	MI	Saginaw	Ed	Albosta	Edward John	175	73	R	R	1941-09-03	1946-09-24	alboe101	albosed01
albreed01	1929	2	28	USA	MO	St. Louis	1979	12	29	USA	IL	Centreville	Ed	Albrecht	Edward Arthur	165	70	R	R	1949-10-02	1950-04-26	albre101	albreed01
albrija01	1921	6	30	USA	FL	St. Petersburg	1991	7	22	USA	CA	San Diego	Jack	Albright	Harold John	175	69	R	R	1947-05-19	1947-07-27	albrj101	albrija01
albural01	1986	6	10	D.R.	San Pedro de Macoris	San Pedro de Macoris							Al	Alburquerque	Alberto Jose	195	72	R	R	2011-04-15	2017-05-19	albua001	albural01
alburvi01	1947	5	12	USA	FL	Key West	2017	4	18	USA	FL	Tampa	Vic	Albury	Victor	190	72	L	L	1973-08-07	1976-09-26	albuv101	alburvi01
alcalsa01	1952	12	23	D.R.	San Pedro de Macoris	San Pedro de Macoris							Santo	Alcala	Santo	195	77	R	R	1976-04-10	1977-09-25	alcas101	alcalsa01
alcanar01	1991	10	29	D.R.	Distrito Nacional	Santo Domingo							Arismendy	Alcantara	Arismendy	170	70	B	R	2014-07-09	2017-06-16	alcaa001	alcanar01
alcanis01	1973	5	6	D.R.	Peravia	Bani							Israel	Alcantara	Israel	180	74	R	R	2000-06-25	2002-08-22	alcai001	alcanis01
alcanra01	1992	12	4	D.R.	Barahona	Barahona							Raul	Alcantara	Raul	220	76	R	R	2016-09-05	2017-04-23	alcar001	alcanra01
alcarlu01	1941	6	20	P.R.		Humacao							Luis	Alcaraz	Angel Luis	165	69	R	R	1967-09-13	1970-06-07	alcal101	alcarlu01
alcocsc01	1885	11	29	USA	OH	Wooster	1973	1	30	USA	OH	Wooster	Scotty	Alcock	John Forbes	160	69	R	R	1914-04-19	1914-08-02	alcos101	alcocsc01
alderda01	1918	3	9	USA	NE	Belden	1982	2	12	USA	CA	Garden Grove	Dale	Alderson	Dale Leonard	190	70	R	R	1943-09-18	1944-07-05	alded101	alderda01
aldremi01	1961	1	29	USA	CA	Carmel							Mike	Aldrete	Michael Peter	180	71	L	L	1986-05-28	1996-09-29	aldrm001	aldremi01
aldresc01	1968	6	12	USA	MI	Flint							Scott	Aldred	Scott Phillip	195	76	L	L	1990-09-09	2000-05-29	aldrs001	aldresc01
aldrico01	1979	6	13	USA	TX	San Angelo							Cory	Aldridge	Cory Jerome	210	72	L	R	2001-09-05	2010-07-11	aldrc001	aldrico01
aldrija01	1961	4	14	USA	LA	Alexandria							Jay	Aldrich	Jay Robert	210	75	R	R	1987-06-05	1990-04-26	aldrj001	aldrija01
aldrivi01	1893	10	25	USA	IN	Crane	1973	4	17	USA	IN	Terre Haute	Vic	Aldridge	Victor	175	69	R	R	1917-04-15	1928-08-29	aldrv101	aldrivi01
alenoch01	1917	2	19	USA	MO	St. Louis	2003	2	10	USA	FL	DeLand	Chuck	Aleno	Charles	215	73	R	R	1941-05-15	1944-09-23	alenc101	alenoch01
alexabo01	1922	8	7	CAN	BC	Vancouver	1993	4	7	USA	CA	Oceanside	Bob	Alexander	Robert Somerville	205	74	R	R	1955-04-11	1957-09-22	alexb101	alexabo01
alexada01	1903	4	26	USA	TN	Greeneville	1979	3	2	USA	TN	Greeneville	Dale	Alexander	David Dale	210	75	R	R	1929-04-16	1933-09-23	alexd101	alexada01
alexado01	1950	9	4	USA	AL	Cordova							Doyle	Alexander	Doyle Lafayette	190	75	R	R	1971-06-26	1989-09-27	alexd001	alexado01
alexaga01	1953	3	27	USA	CA	Los Angeles							Gary	Alexander	Gary Wayne	195	74	R	R	1975-09-12	1981-09-28	alexg101	alexaga01
alexage01	1968	3	26	USA	LA	Baton Rouge							Gerald	Alexander	Gerald Paul	190	71	R	R	1990-09-09	1992-06-30	alexg001	alexage01
alexahu01	1917	7	10	USA	MO	Buffalo	2000	11	25	USA	OK	Oklahoma City	Hugh	Alexander	Hugh	190	72	R	R	1937-08-15	1937-09-22	alexh101	alexahu01
alexama01	1947	1	30	USA	LA	Shreveport							Matt	Alexander	Matthew	168	71	B	R	1973-08-23	1981-10-03	alexm101	alexama01
alexama02	1971	3	20	D.R.	San Pedro de Macoris	San Pedro de Macoris							Manny	Alexander	Manuel de Jesus	150	70	R	R	1992-09-18	2006-09-28	alexm001	alexama02
alexani01	1858	11	24	USA	IL	Pana	1933	12	22	USA	IL	Pana	Nin	Alexander	William Henry	163	64	R	R	1884-06-07	1884-09-03	alexn101	alexani01
alexape01	1887	2	26	USA	NE	Elba	1950	11	4	USA	NE	St. Paul	Pete	Alexander	Grover Cleveland	185	73	R	R	1911-04-15	1930-05-28	alexg102	alexape01
alexasc01	1989	7	10	USA	CA	Santa Rosa							Scott	Alexander	Scott Alain	190	74	L	L	2015-09-02	2017-06-15	alexs001	alexasc02
alexawa01	1891	3	5	USA	GA	Atlanta	1978	12	29	USA	TX	Fort Worth	Walt	Alexander	Walter Ernest	165	70	R	R	1912-06-21	1917-09-08	alexw101	alexawa01
alfarja01	1977	11	29	USA	TX	San Antonio							Jason	Alfaro	Jason	185	70	R	R	2004-09-09	2004-10-01	alfaj001	alfarja01
alfarjo01	1993	6	11	Colombia	Sucre	Sincelejo							Jorge	Alfaro	Jorge Mario	225	74	R	R	2016-09-12	2016-09-25	alfaj002	alfarjo01
alfonan01	1972	4	16	D.R.	La Romana	La Romana							Antonio	Alfonseca	Antonio	250	77	R	R	1997-06-17	2007-09-23	alfoa001	alfonan01
alfoned01	1973	11	8	Venezuela	Miranda	Santa Teresa del Tuy							Edgardo	Alfonzo	Edgardo Antonio	210	71	R	R	1995-04-26	2006-06-11	alfoe001	alfoned01
alfonel01	1979	2	7	Venezuela	Anzoategui	Puerto La Cruz							Eliezer	Alfonzo	Eliezer Jesus	220	71	R	R	2006-06-03	2011-09-13	alfoe002	alfonel01
alforan01	1994	7	20	USA	MS	Columbia							Anthony	Alford	Anthony Joseph	215	73	R	R	2017-05-19	2017-05-23		alforan01
alicelu01	1965	7	29	P.R.		Santurce							Luis	Alicea	Luis Rene	165	69	B	R	1988-04-23	2002-09-25	alicl001	alicelu01
allanan01	1961	12	22	USA	VA	Richmond							Andy	Allanson	Andrew Neal	220	77	R	R	1986-04-07	1995-10-02	allaa001	allanan01
allarbr01	1958	1	3	USA	IL	Spring Valley							Brian	Allard	Brian Marshall	175	73	R	R	1979-08-08	1981-06-10	allab101	allarbr01
allenbe01	1939	4	16	USA	OH	East Liverpool							Bernie	Allen	Bernard Keith	175	72	L	R	1962-04-10	1973-09-19	alleb105	allenbe01
allenbo01	1867	7	10	USA	OH	Marion	1943	5	14	USA	AR	Little Rock	Bob	Allen	Robert Gilman	175	71	R	R	1890-04-19	1900-06-01	alleb103	allenbo01
allenbo02	1894	10	13	USA	WI	Muscoda	1975	12	18	USA	IL	Naperville	Bob	Allen	Robert	180	70	R	R	1919-08-20	1919-09-09	alleb104	allenbo02
allenbo03	1914	7	2	USA	TN	Smithville	2005	10	30	USA	VA	Chesapeake	Bob	Allen	Robert Earl	165	73	R	R	1937-09-19	1937-10-02	alleb102	allenbo03
allenbo04	1937	10	23	USA	TX	Tatum							Bob	Allen	Robert Gray	175	74	L	L	1961-04-14	1967-09-27	alleb101	allenbo04
allenbr01	1986	2	12	USA	TX	Conroe							Brandon	Allen	Brandon Durell	230	74	L	R	2009-08-22	2012-05-09	alleb001	allenbr01
allench01	1975	2	6	USA	TX	Dallas							Chad	Allen	John Chad	195	73	R	R	1999-04-06	2005-06-02	allec001	allench01
allenco01	1988	11	20	USA	FL	Orlando							Cody	Allen	Cody Edward	210	73	R	R	2012-07-20	2017-06-11	allec002	allenco01
allendi01	1942	3	8	USA	PA	Wampum							Dick	Allen	Richard Anthony	187	71	R	R	1963-09-03	1977-06-19	alled101	allendi01
allendu01	1972	8	9	USA	OK	Oklahoma City							Dusty	Allen	Dustin R.	215	76	R	R	2000-07-01	2000-10-01	alled001	allendu01
allenet01	1904	1	1	USA	OH	Cincinnati	1993	9	15	USA	CA	Crescent City	Ethan	Allen	Ethan Nathan	180	73	R	R	1926-06-13	1938-06-18	allee101	allenet01
allenfr01	1888	8	26	USA	AL	Newbern	1933	7	30	USA	AL	Gainsville	Frank	Allen	Frank Leon	175	69	R	L	1912-04-24	1917-09-19	allef101	allenfr01
allenga01	1955	2	4	USA	CA	Culver City							Gary	Allenson	Gary Martin	185	71	R	R	1979-04-08	1985-08-23	alleg001	allenga01
allenha01	1846	4	20	USA	ME	Augusta	1881	2	6	USA	MA	Natick	Ham	Allen	Frank Erwin		64			1872-04-27	1872-08-09	alleh102	allenha01
allenha02	1940	7	23	USA	PA	Wampum							Hank	Allen	Harold Andrew	190	72	R	R	1966-09-09	1973-09-28	alleh104	allenha02
allenhe01	1863	2	25	USA	CT	Westport	1916	9	21	USA	CT	Saugatuck	Hezekiah	Allen	Hezekiah	160	71			1884-05-16	1884-05-16	alleh103	allenhe01
allenho01	1899	6	11	USA	FL	DeLand	1981	7	5	USA	NC	Canton	Horace	Allen	Horace Tanner	187	72	L	R	1919-06-15	1919-09-27	alleh101	allenho01
allenja01	1855	10	2	USA	IL	Woodstock	1915	4	21	USA	NJ	Trenton	Jack	Allen	Cyrus Alban	160		R	R	1879-05-01	1879-07-17	allej103	allenja01
allenja02	1958	5	29	USA	WA	Yakima							Jamie	Allen	James Bradley	205	72	R	R	1983-05-01	1983-09-04	allej101	allenja02
allenje01	1972	1	11	USA	IN	Anderson							Jermaine	Allensworth	Jermaine LaMont	178	72	R	R	1996-07-23	1999-05-29	allej001	allenje01
allenjo01	1890	10	27	USA	WV	Berkeley Springs	1967	9	24	USA	MD	Hagerstown	John	Allen	John Marshall	170	73	R	R	1914-06-02	1914-06-02	allej104	allenjo01
allenjo02	1904	9	30	USA	NC	Lenoir	1959	5	29	USA	FL	St. Petersburg	Johnny	Allen	John Thomas	180	72	R	R	1932-04-19	1944-09-26	allej102	allenjo02
allenki01	1953	4	5	USA	CA	Fontana							Kim	Allen	Kim Bryant	175	71	R	R	1980-09-02	1981-09-29	allek101	allenki01
allenll01	1950	5	8	USA	CA	Merced							Lloyd	Allen	Lloyd Cecil	185	73	R	R	1969-09-01	1975-07-27	allel101	allenll01
allenlu01	1978	8	4	USA	GA	Covington							Luke	Allen	Lucas Gale	208	74	L	R	2002-09-10	2003-07-17	allel001	allenlu01
allenmy01	1854	3	22	USA	NY	Kingston	1924	3	8	USA	NY	Kingston	Myron	Allen	Myron Smith	150	68	R	R	1883-07-19	1888-07-01	allem101	allenmy01
allenne01	1958	1	24	USA	KS	Kansas City							Neil	Allen	Neil Patrick	185	75	R	R	1979-04-15	1989-09-19	allen001	allenne01
allenni01	1888	9	14	USA	KS	Norton	1939	10	16	USA	IL	Hines	Nick	Allen	Artemus Ward	180	72	R	R	1914-05-01	1920-10-02	allen101	allenni01
allenpe01	1868	5	1	USA	OH	Columbiana	1946	4	15	USA	PA	Philadelphia	Pete	Allen	Jesse Hall	185	68	R	R	1893-08-04	1893-08-04	allep101	allenpe01
allenro01	1943	12	23	USA	PA	Wampum							Ron	Allen	Ronald Frederick	205	75	B	R	1972-08-11	1972-08-21	aller101	allenro01
allenro02	1959	10	5	USA	CA	Los Angeles							Rod	Allen	Roderick Bernet	185	73	R	R	1983-04-07	1988-10-02	aller001	allenro02
allensl01	1886	8	23	USA	MO	West Plains	1959	10	16	USA	TX	Lubbock	Sled	Allen	Fletcher Manson	180	73	R	R	1910-05-04	1910-08-05	alles101	allensl01
alleyge01	1940	7	10	USA	VA	Richmond							Gene	Alley	Leonard Eugene	160	70	R	R	1963-09-04	1973-09-27	alleg101	alleyge01
alliebo01	1952	5	1	USA	MA	New Bedford							Bob	Allietta	Robert George	190	72	R	R	1975-05-06	1975-09-28	allib101	alliebo01
alliega01	1931	10	28	USA	NC	Statesville	2016	10	4	USA	TX	San Antonio	Gair	Allie	Gair Roosevelt	190	73	R	R	1954-04-13	1954-09-26	allig101	alliega01
allisan01	1848			USA	NY	New York	1897	3	21	USA	NY	Brooklyn	Andy	Allison	Andrew Kent	150	70			1872-05-07	1872-10-21	allia102	allisan01
allisar01	1849	1	29	USA	PA	Philadelphia	1916	2	25	USA	DC	Washington	Art	Allison	Arthur Algernon	150	68			1871-05-04	1876-10-05	allia101	allisar01
allisbi01	1850	7	16	USA	NY	New York	1887	1	25	USA	NY	Brooklyn	Bill	Allison	William					1872-05-21	1872-07-04	allib102	allisbi01
allisbo01	1934	7	11	USA	MO	Raytown	1995	4	9	USA	AZ	Rio Verde	Bob	Allison	William Robert	205	75	R	R	1958-09-16	1970-09-29	allib103	allisbo01
allisda01	1966	8	14	USA	VA	Front Royal							Dana	Allison	Dana Eric	215	75	R	L	1991-04-12	1991-05-23	allid001	allisda01
allisdo01	1846	7	12	USA	PA	Philadelphia	1916	12	19	USA	DC	Washington	Doug	Allison	Douglas L.	160	70	R	R	1871-05-05	1883-07-13	allid101	allisdo01
allisma01	1887	1	23	USA	KY	Owensboro	1964	3	13	USA	MO	Mount Vernon	Mack	Allison	Mack Pendleton	185	73	R	R	1911-09-13	1913-08-20	allim102	allisma01
allismi01	1890	10	16	USA	MI	Elk Rapids	1957	6	18	USA	WI	Kenosha	Milo	Allison	Milo Henry	163	72	L	R	1913-09-26	1917-06-29	allim101	allismi01
allrebe01	1965	6	4	USA	AZ	Mesa							Beau	Allred	Dale LeBeau	190	72	L	L	1989-09-07	1991-06-25	allrb001	allrebe01
almadme01	1913	2	7	Mexico	Sonora	Huatabampo	1988	8	13	Mexico	Sonora	Caborca	Mel	Almada	Baldomero Melo	170	72	L	L	1933-09-08	1939-10-01	almam101	almadme01
almanar01	1972	10	26	USA	TX	El Paso							Armando	Almanza	Armando	205	75	L	L	1999-07-29	2005-07-20	almaa001	almanar01
almanca01	1973	11	6	D.R.	Santiago	Santiago							Carlos	Almanzar	Carlos Manuel	166	74	R	R	1997-09-04	2005-04-30	almac001	almanca01
almeira01	1887	6	30	Cuba	La Habana	La Habana	1969	3	18	Cuba	La Habana	La Habana	Rafael	Almeida	Rafael D.	164	69	R	R	1911-07-04	1913-07-18	almer101	almeira01
almonab01	1989	6	27	D.R.	Distrito Nacional	Santo Domingo							Abraham	Almonte	Abraham	210	69	B	R	2013-08-30	2017-05-15	almoa001	almonab01
almonbi01	1952	11	21	USA	RI	Providence							Bill	Almon	William Francis	180	75	R	R	1974-09-02	1988-06-14	almob001	almonbi01
almoned01	1976	12	17	D.R.	Santiago	Santiago							Edwin	Almonte	Edwin	200	75	R	R	2003-07-07	2003-09-10	almoe002	almoned01
almoner01	1978	2	1	D.R.	Distrito Nacional	Santo Domingo							Erick	Almonte	Erick R.	245	74	R	R	2001-09-04	2011-04-25	almoe001	almoner01
almonhe01	1975	10	17	D.R.	Distrito Nacional	Santo Domingo							Hector	Almonte	Hector Radhames	190	74	R	R	1999-07-26	2003-09-28	almoh001	almonhe01
almonmi01	1993	4	4	D.R.	Santiago	Santiago							Miguel	Almonte	Miguel Emilio	210	74	R	R	2015-09-01	2017-05-28	almom001	almonmi01
almonzo01	1989	6	10	D.R.	Distrito Nacional	Santo Domingo							Zoilo	Almonte	Zoilo Manuel	205	72	B	R	2013-06-19	2014-07-30	almoz001	almonzo01
almoral01	1994	4	16	USA	FL	Hialeah							Albert	Almora	Reinaldo Albert	190	74	R	R	2016-06-07	2017-06-16	almoa002	almoral01
alomalu01	1923	6	19	Cuba	La Habana	La Habana	1997	4	7	USA	IL	Park Ridge	Luis	Aloma	Luis	195	74	R	R	1950-04-19	1953-08-30	aloml101	alomalu01
alomaro01	1968	2	5	P.R.		Ponce							Roberto	Alomar	Roberto	184	72	B	R	1988-04-22	2004-09-05	alomr001	alomaro01
alomasa01	1943	10	19	P.R.		Salinas							Sandy	Alomar	Santos	140	69	B	R	1964-09-15	1978-09-30	aloms101	alomasa01
alomasa02	1966	6	18	P.R.		Salinas							Sandy	Alomar	Santos	200	77	R	R	1988-09-30	2007-09-30	aloms001	alomasa02
alonsyo01	1987	4	8	Cuba	La Habana	La Habana							Yonder	Alonso	Yonder	230	73	L	R	2010-09-01	2017-06-16	alony001	alonsyo01
aloufe01	1935	5	12	D.R.	San Cristobal	Bajos de Haina							Felipe	Alou	Felipe Rojas	195	72	R	R	1958-06-08	1974-04-24	alouf101	aloufe01
alouje01	1942	3	24	D.R.	San Cristobal	Bajos de Haina							Jesus	Alou	Jesus Maria Rojas	190	74	R	R	1963-09-10	1979-09-29	alouj101	alouje01
alouma01	1938	12	22	D.R.	San Cristobal	Bajos de Haina	2011	11	3	D.R.	Distrito Nacional	Santo Domingo	Matty	Alou	Mateo Rojas	160	69	L	L	1960-09-26	1974-06-21	aloum101	alouma01
aloumo01	1966	7	3	USA	GA	Atlanta							Moises	Alou	Moises Rojas	185	75	R	R	1990-07-26	2008-06-10	aloum001	aloumo01
alperwh01	1879	11	10	USA	PA	Etna	1942	12	25	USA	PA	Pittsburgh	Whitey	Alpermann	Charles Augustus	180	70	R	R	1906-04-13	1909-10-02	alpew101	alperwh01
alstode01	1952	9	22	USA	NY	Valhalla							Dell	Alston	Wendell	180	72	L	R	1977-05-17	1980-10-04	alstd101	alstode01
alstoga01	1971	12	8	USA	NY	Mount Vernon							Garvin	Alston	Garvin James	185	74	R	R	1996-06-06	1996-06-18	alstg001	alstoga01
alstoto01	1926	1	31	USA	NC	Greensboro	1993	12	30	USA	NC	Winston-Salem	Tom	Alston	Thomas Edison	210	77	L	R	1954-04-13	1957-09-29	alstt101	alstoto01
alstowa01	1911	12	1	USA	OH	Venice	1984	10	1	USA	OH	Oxford	Walter	Alston	Walter Emmons	195	74	R	R	1936-09-27	1936-09-27	alstw101	alstowa01
altampo01	1952	5	17	Nicaragua	Matagalpa	Ciudad Dario							Porfi	Altamirano	Porfirio	175	72	R	R	1982-05-09	1984-06-08	altap001	altampo01
altavda01	1992	9	8	USA	PA	McKeesport							Dan	Altavilla	Daniel	200	71	R	R	2016-08-27	2017-06-11	altad001	altavda01
altener01	1894	12	1	USA	OH	Avon	1981	9	9	USA	CA	Napa	Ernie	Alten	Ernest Matthias	175	72	R	L	1920-04-17	1920-06-30	altee101	altener01
altenje01	1893	1	2	USA	MI	Ashley	1973	3	12	USA	MI	Lansing	Jesse	Altenburg	Jesse Howard	158	69	L	R	1916-09-19	1917-05-17	altej101	altenje01
altheaa01	1991	1	14	Germany	Rhineland-Palatinate	Landstuhl							Aaron	Altherr	Aaron Samuel	215	77	R	R	2014-06-16	2017-06-16	altha001	altheaa01
altizda01	1876	11	6	USA	IL	Pearl	1964	5	14	USA	IL	Pleasant Hill	Dave	Altizer	David Tilden	160	70	L	R	1906-05-29	1911-07-10	altid101	altizda01
altmage01	1933	3	20	USA	NC	Goldsboro							George	Altman	George Lee	200	76	L	R	1959-04-11	1967-10-01	altmg101	altmage01
altobjo01	1932	5	26	USA	MI	Detroit							Joe	Altobelli	Joseph Salvatore	185	72	L	L	1955-04-14	1961-10-01	altoj101	altobjo01
altroni01	1876	9	15	USA	OH	Cincinnati	1965	1	20	USA	DC	Washington	Nick	Altrock	Nicholas	197	70	B	L	1898-07-14	1933-10-01	altrn101	altroni01
altuvjo01	1990	5	6	Venezuela	Carabobo	Puerto Cabello							Jose	Altuve	Jose Carlos	165	66	R	R	2011-07-20	2017-06-16	altuj001	altuvjo01
alusige01	1935	2	11	USA	PA	Ashley							George	Alusik	George Joseph	175	75	R	R	1958-09-11	1964-10-02	alusg101	alusige01
alvarab01	1982	10	17	USA	CA	Los Angeles							Abe	Alvarez	Abraham	190	74	L	L	2004-07-22	2006-05-21	alvaa001	alvarab01
alvarcl01	1968	5	18	Venezuela	Anzoategui	Guanta							Clemente	Alvarez	Clemente Rafael	180	71	R	R	2000-09-19	2000-10-01	alvac001	alvarcl01
alvarda01	1989	1	17	D.R.	Santiago	Santiago							Dario	Alvarez	Dario Rafael	170	73	L	L	2014-09-03	2017-06-16	alvad001	alvarda01
alvarda02	1988	11	7	Cuba		Camaguey							Dariel	Alvarez	Dariel	180	74	R	R	2015-08-28	2016-07-25	alvad002	alvarda02
alvarga01	1974	3	6	Mexico	Sonora	Navojoa							Gabe	Alvarez	Gabriel de Jesus	185	73	R	R	1998-06-22	2000-09-30	alvag001	alvarga01
alvarhe01	1990	4	18	Venezuela	Carabobo	Valencia							Henderson	Alvarez	Henderson Javier	205	72	R	R	2011-08-10	2015-05-22	alvah001	alvarhe01
alvarjo01	1956	4	12	USA	FL	Tampa							Jose	Alvarez	Jose Lino	170	70	R	R	1981-10-01	1989-06-24	alvaj001	alvarjo01
alvarjo02	1989	5	6	Venezuela	Anzoategui	Barcelona							Jose	Alvarez	Jose Ricardo	190	71	L	L	2013-06-09	2017-06-15	alvaj003	alvarjo02
alvarjo03	1995	5	21	Venezuela	Zulia	Maracaibo							Jose	Alvarado	Jose Antonio	245	74	L	L	2017-05-03	2017-06-16		alvarjo03
alvarju01	1973	8	9	USA	FL	Coral Gables							Juan	Alvarez	Juan M.	180	73	L	L	1999-09-01	2003-06-03	alvaj002	alvarju01
alvarlu01	1949	1	15	P.R.		Lajas	2001	3	20	P.R.		Lajas	Luis	Alvarado	Luis Cesar	162	69	R	R	1968-09-13	1977-04-30	alval101	alvarlu01
alvaror01	1952	2	28	P.R.		Rio Grande	2016	3	31	P.R.		Rio Grande	Orlando	Alvarez	Jesus Manuel Orlando	165	72	R	R	1973-09-01	1976-06-18	alvao102	alvaror01
alvaros01	1933	10	19	Cuba		Bolondron	2008	3	8	Mexico	Jalisco	Guadalajara	Ossie	Alvarez	Oswaldo	165	70	R	R	1958-04-19	1959-04-26	alvao101	alvaros01
alvarpe01	1987	2	6	D.R.	Distrito Nacional	Santo Domingo							Pedro	Alvarez	Pedro Manuel	250	75	L	R	2010-06-16	2016-10-01	alvap001	alvarpe01
alvarrj01	1991	6	8	USA	FL	West Palm Beach							R. J.	Alvarez	Roy Emilio	225	74	R	R	2014-09-03	2015-09-29	alvar001	alvarrj01
alvarro01	1938	4	18	Cuba	Pinar del Rio	Pinar del Rio	2012	11	30	USA	FL	Hialeah	Rogelio	Alvarez	Rogelio	183	71	R	R	1960-09-18	1962-09-28	alvar101	alvarro01
alvarta01	1971	11	25	Mexico	Sonora	Ciudad Obregon							Tavo	Alvarez	Cesar Octavio	245	75	R	R	1995-08-21	1996-09-29	alvat001	alvarta01
alvarto01	1979	5	10	Venezuela	Distrito Federal	Caracas							Tony	Alvarez	Antonio Enrique	200	73	R	R	2002-09-04	2004-10-03	alvat002	alvarto01
alvarvi01	1976	11	8	Mexico	Sinaloa	Culiacan							Victor	Alvarez	Victor Aurelio	150	70	L	L	2002-07-30	2003-08-26	alvav001	alvarvi01
alvarwi01	1970	3	24	Venezuela	Zulia	Maracaibo							Wilson	Alvarez	Wilson Eduardo	175	73	L	L	1989-07-24	2005-09-28	alvaw001	alvarwi01
alvisma01	1938	2	2	USA	TX	Jasper							Max	Alvis	Roy Maxwell	185	71	R	R	1962-09-11	1970-09-27	alvim101	alvisma01
alvorbi01	1863	8	10	USA	MO	St. Louis	1927	4	7	USA	FL	St. Petersburg	Billy	Alvord	William Crawford	187	70	R	R	1885-04-30	1893-07-08	alvob101	alvorbi01
alyeabr01	1940	12	8	USA	NJ	Passaic							Brant	Alyea	Garrabrant Ryerson	215	75	R	R	1965-09-11	1972-10-03	alyeb101	alyeabr01
amalfjo01	1934	1	23	USA	CA	San Pedro							Joey	Amalfitano	John Joseph	175	71	R	R	1954-05-02	1967-06-27	amalj101	amalfjo01
amarari01	1962	4	1	USA	CA	Visalia							Rich	Amaral	Richard Louis	175	72	R	R	1991-05-27	2000-06-14	amarr001	amarari01
amarial01	1989	4	6	Venezuela	Anzoategui	Barcelona							Alexi	Amarista	Alexi Jose	160	66	L	R	2011-04-26	2017-06-16	amara001	amarial01
amaroru01	1936	1	6	Mexico	Tamaulipas	Nuevo Laredo	2017	3	31	USA	FL	Weston	Ruben	Amaro	Ruben	170	71	R	R	1958-06-29	1969-09-28	amarr101	amaroru01
amaroru02	1965	2	12	USA	PA	Philadelphia							Ruben	Amaro	Ruben	170	70	B	R	1991-06-08	1998-09-27	amarr002	amaroru02
amblewa01	1915	11	8	USA	PA	Abington	1998	1	3	USA	FL	Ponte Vedra Beach	Wayne	Ambler	Wayne Harper	165	68	R	R	1937-06-04	1939-09-04	amblw101	amblewa01
ambrech01	1979	12	19	USA	TX	Beaumont							Chip	Ambres	Raymond Payne	190	73	R	R	2005-07-20	2008-09-28	ambrc001	ambrech01
ambrihe01	1984	5	24	USA	CA	Orange							Hector	Ambriz	Hector	235	74	L	R	2010-04-30	2014-05-07	ambrh001	ambrihe01
amelued01	1959	4	13	USA	CA	Fullerton							Ed	Amelung	Edward Allen	180	71	L	L	1984-07-28	1986-07-07	amele001	amelued01
amesre01	1882	8	2	USA	OH	Warren	1936	10	8	USA	OH	Warren	Red	Ames	Leon Kessling	185	70	B	R	1903-09-14	1919-09-25	amesr101	amesre01
amesst01	1988	3	15	USA	WA	Vancouver							Steve	Ames	Steven C.	205	73	R	R	2013-07-30	2013-08-11	amess001	amesst01
amezaal01	1978	1	16	Mexico	Sonora	Ciudad Obregon							Alfredo	Amezaga	Alfredo	165	71	B	R	2002-05-24	2011-09-04	ameza001	amezaal01
amoledo01	1874	1	1	USA	PA	Coatesville	1912	3	9	USA	DE	Wilmington	Doc	Amole	Morris F.	165	69	R	L	1897-08-19	1898-05-17	amold101	amoledo01
amorosa01	1930	1	30	Cuba	La Habana	La Habana	1992	6	27	USA	FL	Miami	Sandy	Amoros	Edmundo	170	67	L	L	1952-08-22	1960-10-02	amors101	amorosa01
amorvi01	1932	8	8	Cuba	La Habana	La Habana							Vicente	Amor	Vicente	182	75	R	R	1955-04-16	1957-08-26	amorv101	amorvi01
anckewa01	1893	4	10	USA	NY	New York	1954	2	13	USA	NJ	Englewood	Walter	Ancker	Walter	190	73	R	R	1915-09-03	1915-09-14	anckw101	anckewa01
anderal01	1914	1	28	USA	GA	Gainesville	1985	6	23	USA	GA	Albany	Alf	Anderson	Alfred Walton	165	71	R	R	1941-04-20	1946-04-21	andea102	anderal01
anderal02	1964	1	7	USA	OH	Lancaster							Allan	Anderson	Allan Lee	178	71	L	L	1986-06-11	1991-10-06	andea001	anderal02
anderan01	1922	11	13	USA	WA	Bremerton	1982	7	18	USA	WA	Seattle	Andy	Anderson	Andy Holm	172	71	R	R	1948-05-10	1949-10-02	andea101	anderan01
anderbi01	1895	11	28	USA	MA	Boston	1983	3	13	USA	MA	Medford	Bill	Anderson	William Edward	165	73	R	L	1925-09-10	1925-09-17	andeb103	anderbi01
anderbo01	1935	9	29	USA	IN	East Chicago	2015	3	12	USA	OK	Tulsa	Bob	Anderson	Robert Carl	210	76	R	R	1957-07-31	1963-09-25	andeb102	anderbo01
anderbr01	1964	1	18	USA	MD	Silver Spring							Brady	Anderson	Brady Kevin	170	73	L	L	1988-04-04	2002-05-20	andeb001	anderbr01
anderbr02	1972	4	26	USA	VA	Portsmouth							Brian	Anderson	Brian James	190	73	B	L	1993-09-10	2005-05-08	andeb002	anderbr02
anderbr03	1982	3	11	USA	AZ	Tucson							Brian	Anderson	Brian Nikola	220	74	R	R	2005-08-16	2009-10-04	andeb003	anderbr03
anderbr04	1988	2	1	USA	TX	Midland							Brett	Anderson	Brett Franklin	230	75	L	L	2009-04-10	2017-05-06	andeb004	anderbr04
anderbr05	1986	12	16	USA	CA	Thousand Oaks							Bryan	Anderson	Bryan Douglas	200	73	L	R	2010-04-15	2015-10-04	andeb005	anderbr05
anderbu01	1956	5	27	USA	NY	Westbury							Bud	Anderson	Karl Adam	210	75	R	R	1982-06-11	1983-10-02	andeb101	anderbu01
anderch01	1987	11	30	USA	TX	Wichita Falls							Chase	Anderson	Robert Chase	200	73	R	R	2014-05-11	2017-06-11	andec001	anderch01
anderco01	1990	9	14	USA	CA	Quincy							Cody	Anderson	Cody Andrew	240	76	R	R	2015-06-21	2016-09-28	andec002	anderco01
andercr01	1938	7	1	USA	DC	Washington							Craig	Anderson	Norman Craig	205	74	R	R	1961-06-23	1964-05-31	andec101	andercr01
anderda01	1868	10	10	USA	PA	Chester	1897	3	22	USA	PA	Chester	Dave	Anderson	David S.				L	1889-08-24	1890-09-29	anded102	anderda01
anderda02	1960	8	1	USA	KY	Louisville							Dave	Anderson	David Carter	185	74	R	R	1983-05-08	1992-10-03	anded001	anderda02
anderdr01	1981	6	9	USA	NE	Kearney							Drew	Anderson	Drew Thomas	195	74	L	R	2006-09-11	2006-10-01	anded002	anderdr01
anderdw01	1947	11	23	USA	CA	Oakland							Dwain	Anderson	Dwain Cleaven	165	71	R	R	1971-09-03	1974-05-28	anded101	anderdw01
anderfe01	1918	1	9	USA	KS	Maple City	1978	3	12	USA	MO	Joplin	Ferrell	Anderson	Ferrell Jack	200	73	R	R	1946-04-16	1953-09-01	andef102	anderfe01
anderfr01	1885	12	11	USA	NC	Calahan	1957	11	8	USA	NC	Winston-Salem	Fred	Anderson	John Frederick	180	74	R	R	1909-09-25	1918-07-09	andef101	anderfr01
anderga01	1972	6	30	USA	CA	Los Angeles							Garret	Anderson	Garret Joseph	190	75	L	L	1994-07-27	2010-08-06	andeg001	anderga01
anderge01	1889	9	26	USA	OH	Cleveland	1962	5	28	USA	OH	Cleveland	George	Anderson	George Jendrus	160	68	L	R	1914-05-26	1918-09-02	andeg102	anderge01
andergo01	1880	1	13	USA	OH	Cleveland	1923	3	15	USA	IN	South Bend	Goat	Anderson	Edward John			L	R	1907-04-11	1907-10-06	andeg101	andergo01
anderha01	1904	2	10	USA	MO	St. Louis	1974	5	1	USA	MO	St. Louis	Hal	Anderson	Harold	160	71	R	R	1932-04-12	1932-04-24	andeh102	anderha01
anderha02	1931	9	10	USA	MD	North East	1998	6	11	USA	DE	Greenville	Harry	Anderson	Harry Walter	205	75	L	R	1957-04-18	1961-05-05	andeh101	anderha02
anderja01	1979	6	9	USA	IL	Danville							Jason	Anderson	Jason Roger	188	72	L	R	2003-03-31	2005-07-15	andej003	anderja01
anderji01	1957	2	23	USA	CA	Los Angeles							Jim	Anderson	James Lea	170	72	R	R	1978-07-02	1984-09-26	andej001	anderji01
anderji02	1976	1	22	USA	VA	Portsmouth							Jimmy	Anderson	James Drew	195	73	L	L	1999-07-04	2004-07-21	andej002	anderji02
anderjo01	1873	12	14	Norway		Sarpsborg	1949	7	23	USA	MA	Worcester	John	Anderson	John Joseph	180	74	B	R	1894-09-08	1908-10-02	andej101	anderjo01
anderjo02	1929	11	23	USA	MN	St. Paul	1998	12	20	USA	TX	Houston	John	Anderson	John Charles	190	73	R	R	1958-08-17	1962-06-23	andej102	anderjo02
anderjo03	1982	8	10	USA	KY	Somerset							Josh	Anderson	Joshua Aaron	195	74	L	R	2007-09-02	2009-10-02	andej004	anderjo03
anderke01	1963	8	12	USA	SC	Florence							Kent	Anderson	Kent McKay	180	73	R	R	1989-04-15	1990-09-06	andek001	anderke01
anderla01	1952	12	3	USA	CA	Maywood							Larry	Anderson	Lawrence Dennis	190	75	R	R	1974-09-25	1977-06-26	andel101	anderla01
anderla02	1953	5	6	USA	OR	Portland							Larry	Andersen	Larry Eugene	200	75	R	R	1975-09-05	1994-07-31	andel001	anderla02
anderla03	1987	9	25	USA	CA	Oakland							Lars	Anderson	Lars Eric	215	76	L	L	2010-09-06	2012-05-01	andel002	anderla03
anderma01	1976	8	17	USA	KY	Louisville							Matt	Anderson	Matthew Jason	200	76	R	R	1998-06-25	2005-07-01	andem002	anderma01
anderma02	1974	1	6	USA	AL	Montgomery							Marlon	Anderson	Marlon Ordell	190	70	L	R	1998-09-08	2009-04-10	andem003	anderma02
andermi01	1951	6	22	USA	SC	Florence							Mike	Anderson	Michael Allen	200	74	R	R	1971-09-02	1979-09-30	andem101	andermi01
andermi02	1966	7	30	USA	TX	Austin							Mike	Anderson	Michael James	200	75	R	R	1993-09-07	1993-09-17	andem001	andermi02
anderre01	1912	6	19	USA	IA	Lawton	1972	8	7	USA	IA	Sioux City	Red	Anderson	Arnold Revola	210	75	R	R	1937-09-19	1941-09-24	ander102	anderre01
anderri01	1953	12	25	USA	CA	Inglewood	1989	6	23	USA	CA	Wilmington	Rick	Anderson	Richard Lee	210	74	R	R	1979-09-18	1980-10-05	ander101	anderri01
anderri02	1956	11	29	USA	WA	Everett							Rick	Anderson	Richard Arlen	175	72	R	R	1986-06-09	1988-07-28	ander001	anderri02
andersc01	1962	8	1	USA	OR	Corvallis							Scott	Anderson	Scott Richard	190	78	R	R	1987-04-08	1995-08-26	andes001	andersc01
andersp01	1934	2	22	USA	SD	Bridgewater	2010	11	4	USA	CA	Thousand Oaks	Sparky	Anderson	George Lee	170	69	R	R	1959-04-10	1959-09-27	andes101	andersp01
anderti01	1993	6	23	USA	AL	Tuscaloosa							Tim	Anderson	Timothy Devon	185	73	R	R	2016-06-10	2017-06-16	andet001	anderti01
anderty01	1989	12	30	USA	NV	Las Vegas							Tyler	Anderson	Tyler John	210	76	L	L	2016-06-12	2017-05-30	andet002	anderty01
anderva01	1866	6	18	USA	IL	Geneva	1941	11	5	USA	IL	Rockford	Varney	Anderson	Warner Samuel	165	70	R	R	1889-08-01	1896-05-06	andev101	anderva01
anderwa01	1897	9	25	USA	MI	Grand Rapids	1990	1	6	USA	MI	Battle Creek	Walter	Anderson	Walter Carl	160	74	L	L	1917-05-14	1919-05-02	andew102	anderwa01
anderwi01	1886	8	13	USA	TX	Lillian	1950	12	19	USA	TX	Fort Worth	Wingo	Anderson	Wingo Charlie	150	70	L	L	1910-04-16	1910-06-01	andew101	anderwi01
andinro01	1984	4	25	USA	FL	Miami							Robert	Andino	Robert Lazaro	185	71	R	R	2005-09-04	2016-09-10	andir001	andinro01
andrast01	1978	2	6	USA	CA	Woodland							Steve	Andrade	Stephen Michael	220	73	R	R	2006-05-01	2006-05-10	andrs002	andrast01
andrecl01	1978	5	15	USA	FL	Dunedin							Clayton	Andrews	Clayton John	175	72	R	L	2000-04-16	2000-06-13	andrc001	andrecl01
andreed01	1859	4	5	USA	OH	Painesville	1934	8	12	USA	FL	West Palm Beach	Ed	Andrews	George Edward	160	68	R	R	1884-05-01	1891-07-26	andre101	andreed01
andreel01	1901	12	11	USA	SC	Greenwood	1979	11	25	USA	SC	Greenwood	Elbert	Andrews	Elbert DeVore	175	72	L	R	1925-05-01	1925-06-12	andre102	andreel01
andreer01	1918	1	11	USA	IN	Jeffersonville	2008	9	19	USA	FL	Bradenton	Ernie	Andres	Ernest Henry	200	73	R	R	1946-04-16	1946-05-16	andre103	andreer01
andrefr01	1952	5	4	USA	LA	Lafayette							Fred	Andrews	Fred	163	68	R	R	1976-09-26	1977-10-02	andrf101	andrefr01
andrehu01	1922	8	31	USA	OK	Burbank	2012	3	11	USA	KS	Dodge City	Hub	Andrews	Hubert	170	72	R	R	1947-04-20	1948-04-30	andrh101	andrehu01
andreiv01	1907	5	6	USA	AL	Dora	1970	11	24	USA	AL	Birmingham	Ivy	Andrews	Ivy Paul	200	73	R	R	1931-08-15	1938-09-28	andri101	andreiv01
andreji01	1865	6	5	USA	MA	Shelburne Falls	1907	12	27	USA	IL	Chicago	Jim	Andrews	James Pratt					1890-04-19	1890-07-04	andrj103	andreji01
andrejo01	1923	1	3	USA	MA	Brockton	1976	11	25	USA	MA	Barnstable	John	Andre	John Edward	200	76	L	R	1955-04-16	1955-07-16	andrj102	andrejo01
andrejo02	1949	2	9	USA	CA	Monterey Park							John	Andrews	John Richard	175	70	L	L	1973-04-08	1973-09-19	andrj101	andrejo02
andreki01	1953	11	14	USA	CA	Glendale							Kim	Andrew	Kim Darrell	160	70	R	R	1975-04-16	1975-04-21	andrk101	andreki01
andremi01	1943	7	9	USA	CA	Los Angeles							Mike	Andrews	Michael Jay	195	75	R	R	1966-09-18	1973-09-29	andrm101	andremi01
andrena01	1913	9	30	USA	NC	Pembroke	1991	4	26	USA	NC	Winston-Salem	Nate	Andrews	Nathan Hardy	195	72	R	R	1937-05-01	1946-06-23	andrn101	andrena01
andrero01	1952	12	11	USA	CA	Santa Monica							Rob	Andrews	Robert Patrick	185	72	R	R	1975-04-07	1979-09-26	andrr101	andrero01
andresh01	1971	8	28	USA	TX	Dallas							Shane	Andrews	Darrell Shane	215	73	R	R	1995-04-26	2002-09-29	andrs001	andresh01
andrest01	1917	4	17	USA	MA	Lynn	1995	6	10	USA	FL	Bradenton	Stan	Andrews	Stanley Joseph	178	71	R	R	1939-06-11	1945-09-30	andrs101	andrest01
andrewa01	1859	9	18	USA	PA	Philadelphia	1940	1	20	USA	IN	Indianapolis	Wally	Andrews	William Walter	170	75	R	R	1884-05-22	1888-08-08	andrw102	andrewa01
andrima01	1989	8	28	USA	CA	Redlands							Matt	Andriese	Matthew Lee	225	74	R	R	2015-04-10	2017-06-10	andrm001	andrima01
andrubi01	1907	7	25	USA	TX	Beaumont	1982	3	12	USA	DC	Washington	Bill	Andrus	William Morgan	185	72	R	R	1931-09-19	1937-05-11	andrb101	andrubi01
andruel01	1988	8	26	Venezuela	Aragua	Maracay							Elvis	Andrus	Elvis Augusto	200	72	R	R	2009-04-06	2017-06-16	andre001	andruel01
andrufr01	1850	8	23	USA	MI	Washington	1937	11	10	USA	MI	Detroit	Fred	Andrus	Frederick Hotham	185	74	R	R	1876-07-25	1884-07-04	andrf102	andrufr01
andruwi01	1858	10	14	CAN	ON	Orono	1935	6	17	USA	MT	Miles City	Wyman	Andrus	William Wiman	155	66			1885-09-15	1885-09-15	andrw101	andruwi01
andujjo01	1952	12	21	D.R.	San Pedro de Macoris	San Pedro de Macoris	2015	9	8	D.R.	San Pedro de Macoris	San Pedro de Macoris	Joaquin	Andujar	Joaquin	170	72	B	R	1976-04-08	1988-09-30	anduj001	andujjo01
andujlu01	1972	11	22	D.R.	Peravia	Bani							Luis	Andujar	Luis	175	74	R	R	1995-09-08	1998-06-28	andul001	andujlu01
angelno01	1947	9	24	USA	CA	San Francisco							Norm	Angelini	Norman Stanley	175	71	L	L	1972-07-22	1973-06-19	angen101	angelno01
anglema01	1985	9	10	USA	OH	Columbus							Matt	Angle	Matthew Ryan	185	69	L	R	2011-07-17	2011-09-28	anglm001	anglema01
angleto01	1904	10	2	USA	MD	Baltimore	1952	10	26	USA	KS	Wichita	Tom	Angley	Thomas Samuel	190	68	L	R	1929-04-23	1929-04-30	anglt101	angleto01
ankenpa01	1912	12	23	USA	TX	Houston	1989	1	13	USA	TX	Houston	Pat	Ankenman	Frederick Norman	125	64	R	R	1936-04-16	1944-06-02	ankep101	ankenpa01
ankieri01	1979	7	19	USA	FL	Fort Pierce							Rick	Ankiel	Richard Alexander	210	73	L	L	1999-08-23	2013-06-08	ankir001	ankieri01
annade01	1986	11	24	USA	IL	Glenwood							Dean	Anna	Dean William	180	71	L	R	2014-04-04	2015-04-23	annad001	annade01
annisbi01	1857	5	24	USA	MA	Stoneham	1923	6	10	USA	ME	Kennebunkport	Bill	Annis	William Perley	150	67	R		1884-05-01	1884-08-08	annib101	annisbi01
ansonca01	1852	4	17	USA	IA	Marshalltown	1922	4	14	USA	IL	Chicago	Cap	Anson	Adrian Constantine	227	72	R	R	1871-05-06	1897-10-03	ansoc101	ansonca01
anthoer01	1967	11	8	USA	CA	San Diego							Eric	Anthony	Eric Todd	195	74	L	L	1989-07-28	1997-09-27	anthe001	anthoer01
antoldu01	1989	8	9	USA	HI	Mililani							Dustin	Antolin	Dustin Kamakana Mai Ku'u Makualani	230	74	R	R	2016-05-16	2016-05-16	antod001	antoldu01
antoljo01	1916	4	11	USA	PA	Hokendauqua	2002	6	25	USA	PA	Catasauqua	Joe	Antolick	Joseph	185	72	R	R	1944-09-20	1944-09-26	antoj102	antoljo01
antonbi01	1927	5	19	USA	NY	Brooklyn	1993	3	4	USA	MN	Fridley	Bill	Antonello	William James	185	71	R	R	1953-04-30	1953-09-27	antob101	antonbi01
antonjo01	1915	7	15	USA	TN	Memphis	1990	4	18	USA	TN	Memphis	John	Antonelli	John Lawrence	165	70	R	R	1944-09-16	1945-09-17	antoj101	antonjo01
antonjo02	1930	4	12	USA	NY	Rochester							Johnny	Antonelli	John August	185	73	L	L	1948-07-04	1961-09-04	antoj103	antonjo02
antonma01	1985	4	8	USA	MA	Peabody							Matt	Antonelli	Matthew Antonio	195	73	R	R	2008-09-01	2008-09-28	antom001	antonma01
aokino01	1982	1	5	Japan	Miyazaki	Hyuga							Nori	Aoki	Norichika	180	69	L	R	2012-04-06	2017-06-16	aokin001	aokino01
aparilu01	1934	4	29	Venezuela	Zulia	Maracaibo							Luis	Aparicio	Luis Ernesto	160	69	R	R	1956-04-17	1973-09-28	aparl101	aparilu01
apodabo01	1950	1	31	USA	CA	Los Angeles							Bob	Apodaca	Robert John	170	71	R	R	1973-09-18	1977-09-18	apodb101	apodabo01
apontlu01	1953	6	14	Venezuela	Anzoategui	El Tigre							Luis	Aponte	Luis Eduardo	185	72	R	R	1980-09-04	1984-07-06	aponl001	apontlu01
appieke01	1967	12	6	USA	CA	Lancaster							Kevin	Appier	Robert Kevin	180	74	R	R	1989-06-04	2004-04-23	appik001	appieke01
appleed01	1892	2	29	USA	TX	Arlington	1932	1	27	USA	TX	Arlington	Ed	Appleton	Edward Samuel	173	72	R	R	1915-04-16	1916-10-05	apple101	appleed01
applefr01	1879	5	9	USA	PA	Williamsport	1968	4	21	USA	PA	Williamsport	Fred	Applegate	Frederick Romaine	180	74	R	R	1904-09-30	1904-10-10	applf101	applefr01
applepe01	1904	5	20	USA	CT	Terryville	1974	1	18	USA	NJ	Trenton	Pete	Appleton	Peter William	180	71	R	R	1927-09-14	1945-09-20	applp101	applepe01
applilu01	1907	4	2	USA	NC	High Point	1991	1	3	USA	GA	Cumming	Luke	Appling	Lucius Benjamin	183	70	R	R	1930-09-10	1950-10-01	appll101	applilu01
aquingr01	1978	1	11	D.R.	San Cristobal	Puerto Palenque							Greg	Aquino	Gregori Emilio	190	73	R	R	2004-07-02	2009-06-17	aquig001	aquingr01
aquinja01	1992	11	22	D.R.	San Pedro de Macoris	San Pedro de Macoris							Jayson	Aquino	Jayson Julio	225	73	L	L	2016-07-04	2017-04-29	aquij001	aquinja01
aquinlu01	1964	5	19	P.R.		Santurce							Luis	Aquino	Luis Antonio	155	72	R	R	1986-08-08	1995-09-12	aquil001	aquinlu01
aragoan01	1890	8	2	Cuba	La Habana	La Habana	1952	1	24	USA	NY	New York	Angel	Aragon	Angel	150	65	R	R	1914-08-20	1917-07-21	araga101	aragoan01
aragoja01	1915	11	20	Cuba	La Habana	La Habana	1988	4	4	USA	FL	Clearwater	Jack	Aragon	Angel Valdes	176	70	R	R	1941-08-13	1941-08-13	aragj101	aragoja01
araujel01	1991	7	15	Venezuela	Zulia	Maracaibo							Elvis	Araujo	Elvis Alejandro	275	79	L	L	2015-05-05	2016-08-16	araue001	araujel01
archdma01	1898	12	14	USA	MO	St. Louis	1954	9	5	USA	MO	St. Louis	Maurice	Archdeacon	Maurice John	153	68	L	L	1923-09-17	1925-05-29	archm101	archdma01
archech01	1988	9	26	USA	NC	Raleigh							Chris	Archer	Christopher Alan	195	74	R	R	2012-06-20	2017-06-11	archc001	archech01
archefr01	1910	3	7	USA	TN	Johnson City	1981	10	31	USA	NC	Charlotte	Fred	Archer	Frederick Marvin	193	72	L	L	1936-09-05	1937-09-09	archf101	archefr01
archeji01	1883	5	13	Ireland	Dublin	Dublin	1958	3	29	USA	WI	Milwaukee	Jimmy	Archer	James Patrick	168	70	R	R	1904-09-06	1918-09-02	archj102	archeji01
archeji02	1932	5	25	USA	VA	Max Meadows							Jim	Archer	James William	190	72	R	L	1961-04-30	1962-09-19	archj101	archeji02
archige01	1914	4	27	USA	TN	Nashville	2001	9	20	USA	TN	Nashville	George	Archie	George Albert	170	72	R	R	1938-09-14	1946-04-21	archg101	archige01
arciajo01	1943	8	22	Cuba	La Habana	La Habana	2016	7	30	USA	FL	Miami	Jose	Arcia	Jose Raimundo	170	75	R	R	1968-04-10	1970-09-30	arcij101	arciajo01
arciaor01	1994	8	4	Venezuela	Anzoategui	Anaco							Orlando	Arcia	Orlando Jesus	165	72	R	R	2016-08-02	2017-06-16	arcio002	arciaor01
arciaos01	1991	5	9	Venezuela	Anzoategui	Anaco							Oswaldo	Arcia	Oswaldo Celestino	225	72	L	R	2013-04-15	2016-09-18	arcio001	arciaos01
ardelda01	1941	5	27	USA	WA	Seattle							Dan	Ardell	Daniel Miers	190	74	L	L	1961-09-14	1961-09-27	arded101	ardelda01
ardizru01	1919	11	20	Italy	Novara	Oleggio	2015	7	19	USA	CA	San Francisco	Rugger	Ardizoia	Rinaldo Joseph	180	71	R	R	1947-04-30	1947-04-30	ardir101	ardizru01
ardnejo01	1858	2	27	USA	OH	Mount Vernon	1935	9	15	USA	OH	Cleveland	Joe	Ardner	Joseph A.	160	67	R	R	1884-05-01	1890-08-18	ardnj101	ardnejo01
ardoida01	1974	7	8	USA	LA	Mamou							Danny	Ardoin	Daniel Wayne	205	72	R	R	2000-08-02	2008-09-26	ardod001	ardoida01
arellfr01	1882	1	28	USA	CA	Santa Cruz	1918	12	13	USA	CA	San Jose	Frank	Arellanes	Frank Julian	180	72	R	R	1908-07-28	1910-08-14	arelf101	arellfr01
arenano01	1991	4	16	USA	CA	Newport Beach							Nolan	Arenado	Nolan James	205	74	R	R	2013-04-28	2017-06-16	arenn001	arenano01
arencjp01	1986	1	5	USA	FL	Miami							J. P.	Arencibia	Jonathan Paul	210	73	R	R	2010-08-07	2015-10-01	arenj001	arencjp01
arftha01	1922	1	28	USA	MO	Manchester	2002	12	14	USA	MO	St. Louis	Hank	Arft	Henry Irven	190	70	L	L	1948-07-27	1952-05-23	arfth101	arftha01
ariasal01	1967	11	20	USA	NY	New York							Alex	Arias	Alejandro	185	75	R	R	1992-05-12	2002-09-22	ariaa001	ariasal01
ariasal02	1983	10	14	D.R.	Distrito Nacional	Santo Domingo							Alberto	Arias	Alberto A.	155	71	R	R	2007-05-01	2009-08-23	ariaa002	ariasal02
ariasge01	1972	3	12	USA	AZ	Tucson							George	Arias	George Alberto	190	71	R	R	1996-04-02	1999-07-28	ariag001	ariasge01
ariasjo01	1984	9	21	D.R.	Distrito Nacional	Santo Domingo							Joaquin	Arias	Joaquin	185	73	R	R	2006-09-13	2015-07-24	ariaj001	ariasjo01
ariasru01	1931	6	6	Cuba		Las Villas							Rudy	Arias	Rodolfo	165	70	L	L	1959-04-10	1959-08-26	ariar101	ariasru01
arletbu01	1899	1	3	USA	CA	Elmhurst	1964	5	16	USA	MN	Minneapolis	Buzz	Arlett	Russell Loris	225	75	B	R	1931-04-14	1931-09-27	arleb101	arletbu01
arlicdo01	1943	2	15	USA	MI	Wayne							Don	Arlich	Donald Louis	185	74	L	L	1965-10-02	1966-08-04	arlid101	arlicdo01
arlinst01	1945	9	25	USA	WA	Seattle	2016	8	17	USA	CA	San Diego	Steve	Arlin	Stephen Ralph	195	75	R	R	1969-06-17	1974-09-14	arlis101	arlinst01
armasma01	1969	8	5	Venezuela	Anzoategui	Puerto Piritu							Marcos	Armas	Marcos Rafael	190	77	R	R	1993-05-25	1993-09-29	armam001	armasma01
armasto01	1953	7	2	Venezuela	Anzoategui	Puerto Piritu							Tony	Armas	Antonio Rafael	182	71	R	R	1976-09-06	1989-10-01	armat001	armasto01
armasto02	1978	4	29	Venezuela	Anzoategui	Puerto Piritu							Tony	Armas	Antonio Jose	205	76	R	R	1999-08-16	2008-07-07	armat002	armasto02
armbrch01	1880	8	30	USA	OH	Cincinnati	1964	10	7	USA	OR	Grants Pass	Charlie	Armbruster	Charles Anthony	180	69	R	R	1905-07-17	1907-09-11	armbc101	armbrch01
armbred01	1948	7	4	Bahamas	New Providence	Nassau							Ed	Armbrister	Edison Rosanda	160	71	R	R	1973-08-31	1977-10-02	armbe101	armbred01
armbrha01	1882	3	20	USA	OH	Liverpool	1953	12	10	USA	OH	Cincinnati	Harry	Armbruster	Harry Gregory	190	70	L	L	1906-04-30	1906-10-03	armbh101	armbrha01
armbror01	1908	3	2	USA	AR	Beirne	1967	10	2	USA	AL	Mobile	Orville	Armbrust	Orville Martin	195	70	R	R	1934-09-18	1934-09-30	armbo101	armbror01
armoubi99	1869	9	3	USA	PA	Homestead	1922	12	2	USA	MN	Minneapolis	Bill	Armour	William Reginald							armob801	armoubi99
armstbo01	1850	7	4	USA	MD	Baltimore	1917	12	3	USA	TX	Fort Worth	Robert	Armstrong	Robert Livingston	160	74			1871-06-26	1871-08-29	armsr101	armstsa01
armstge01	1924	6	3	USA	NJ	Orange	1993	7	24	USA	NJ	Orange	George	Armstrong	Noble George	190	70	R	R	1946-04-26	1946-06-23	armsg101	armstge01
armstho01	1889	12	2	USA	OH	East Claridon	1926	3	8	USA	NY	Canisteo	Howard	Armstrong	Howard Elmer	165	69	R	R	1911-09-30	1911-09-30	armsh101	armstho01
armstja01	1965	3	7	USA	NJ	Englewood							Jack	Armstrong	Jack William	220	77	R	R	1988-06-21	1994-04-17	armsj001	armstja01
armstmi01	1954	3	7	USA	NY	Glen Cove							Mike	Armstrong	Michael Dennis	193	75	R	R	1980-08-12	1987-07-05	armsm001	armstmi01
armstsh01	1990	9	11	USA	NC	New Bern							Shawn	Armstrong	Shawn Michael	225	74	R	R	2015-08-08	2017-05-27	armss001	armstsh01
arndtha01	1879	2	12	USA	IN	South Bend	1921	3	25	USA	IN	South Bend	Harry	Arndt	Harry John	165		R	R	1902-07-02	1907-05-25	arndh101	arndtha01
arndtla01	1963	2	25	USA	OH	Fremont	2014	1	3	USA	AZ	Tucson	Larry	Arndt	Larry Wayne	195	73	R	R	1989-06-06	1989-06-07	arndl001	arndtla01
arnolbi01	1851	3	2	USA	CT	Middletown	1899	1	18	USA	NY	Albany	Billy	Arnold	Willis S.					1872-04-26	1872-05-02	arnob101	arnolbi01
arnolch01	1947	11	6	USA	CA	Long Beach							Chris	Arnold	Christopher Paul	160	70	R	R	1971-09-07	1976-10-02	arnoc101	arnolch01
arnolja01	1974	3	24	USA	MI	Dearborn							Jamie	Arnold	James Lee	190	74	R	R	1999-04-20	2000-10-01	arnoj001	arnolja01
arnolsc01	1962	8	18	USA	KY	Lexington							Scott	Arnold	Scott Gentry	210	74	R	R	1988-04-07	1988-04-23	arnos001	arnolsc01
arnolto01	1959	5	3	USA	TX	El Paso							Tony	Arnold	Tony Dale	170	71	R	R	1986-08-09	1987-10-03	arnot001	arnolto01
arnovmo01	1910	11	16	USA	WI	Superior	1959	7	20	USA	WI	Superior	Morrie	Arnovich	Morris	168	70	R	R	1936-09-14	1946-04-21	arnom101	arnovmo01
arnsbbr01	1963	8	20	USA	WA	Seattle							Brad	Arnsberg	Bradley James	205	76	R	R	1986-09-06	1992-04-23	arnsb001	arnsbbr01
arntzor01	1909	10	18	USA	IL	Beverly	1970	1	28	USA	IA	Cedar Rapids	Orie	Arntzen	Orie Edgar	200	73	R	R	1943-04-20	1943-09-26	arnto101	arntzor01
arochre01	1964	2	24	Cuba	La Habana	La Habana							Rene	Arocha	Rene	180	72	R	R	1993-04-09	1997-06-06	arocr001	arochre01
arojo01	1990	10	10	D.R.	La Vega	La Vega							Jonathan	Aro	Jonathan Arturo	235	72	R	R	2015-06-25	2016-06-20	aro-j001	arojo01
arredjo01	1984	3	12	D.R.	San Pedro de Macoris	San Pedro de Macoris							Jose	Arredondo	Jose Juan	190	72	R	R	2008-05-14	2012-10-03	arrej001	arredjo01
arrieja01	1986	3	6	USA	MO	Farmington							Jake	Arrieta	Jacob Joseph	225	76	R	R	2010-06-10	2017-06-11	arrij001	arrieja01
arrigge01	1941	6	12	USA	IL	Chicago							Gerry	Arrigo	Gerald William	185	73	L	L	1961-06-12	1970-06-05	arrig101	arrigge01
arrojro01	1965	7	18	Cuba	Villa Clara	Santa Clara							Rolando	Arrojo	Luis Rolando	215	76	R	R	1998-04-01	2002-09-22	arror001	arrojro01
arroybr01	1977	2	24	USA	FL	Key West							Bronson	Arroyo	Bronson Anthony	185	75	R	R	2000-06-12	2017-06-12	arrob001	arroybr01
arroych01	1995	5	30	USA	FL	Tampa							Christian	Arroyo	Christian Israel	180	73	R	R	2017-04-24	2017-06-02		arroych01
arroyfe01	1952	3	21	USA	CA	Sacramento							Fernando	Arroyo	Fernando	180	74	R	R	1975-06-28	1986-08-11	arrof001	arroyfe01
arroylu01	1927	2	18	P.R.		Penuelas	2016	1	13	P.R.		Ponce	Luis	Arroyo	Luis Enrique	178	68	L	L	1955-04-20	1963-05-28	arrol101	arroylu01
arroyru01	1950	6	19	USA	NY	New York							Rudy	Arroyo	Rudolph	195	74	L	L	1971-06-01	1971-06-24	arror101	arroyru01
arrueer01	1990	3	25	Cuba	Cienfuegos	Cienfuegos							Erisbel	Arruebarrena	Barbaro Erisbel	230	73	R	R	2014-05-23	2014-09-28	arrue001	arrueba01
arundha01	1855	2	8	USA	PA	Philadelphia	1904	3	25	USA	OH	Cleveland	Harry	Arundel	Harry	145	66		R	1875-07-19	1884-10-10	arunh101	arundha01
arundtu01	1862	6	30	USA	NY	Auburn	1912	9	5	USA	NY	Romulus	Tug	Arundel	John Thomas	175	70	R	R	1882-05-23	1888-09-27	arunt101	arundtu01
asadora01	1962	10	20	USA	CA	Fresno							Randy	Asadoor	Randall Carl	185	73	R	R	1986-09-14	1986-10-05	asadr001	asadora01
asbelji01	1914	6	22	USA	TX	Dallas	1967	7	6	USA	CA	San Mateo	Jim	Asbell	James Marion	195	72	R	R	1938-05-08	1938-10-02	asbej101	asbelji01
asbjoca01	1909	6	19	USA	MA	Concord	1970	1	21	USA	PA	Williamsport	Casper	Asbjornson	Robert Anthony	196	73	R	R	1928-09-17	1932-08-31	asbjc101	asbjoca01
ascanjo01	1985	5	2	Venezuela	Aragua	Maracay							Jose	Ascanio	Jose Eleazar	195	71	R	R	2007-07-13	2011-06-05	ascaj001	ascanjo01
ascheco01	1990	6	30	USA	MO	St. Charles							Cody	Asche	Cody James	205	73	L	R	2013-07-30	2017-05-12	aschc001	ascheco01
asencmi01	1980	9	29	D.R.	Santo Domingo	Villa Mella							Miguel	Asencio	Miguel	190	74	R	R	2002-04-06	2006-04-29	asenm001	asencmi01
ashburi01	1927	3	19	USA	NE	Tilden	1997	9	9	USA	NY	New York	Richie	Ashburn	Don Richard	170	70	L	R	1948-04-20	1962-09-30	ashbr101	ashburi01
ashbyal01	1951	7	8	USA	CA	Long Beach							Alan	Ashby	Alan Dean	185	74	B	R	1973-07-03	1989-05-09	ashba001	ashbyal01
ashbyan01	1967	7	11	USA	MO	Kansas City							Andy	Ashby	Andrew Jason	180	73	R	R	1991-06-10	2004-09-14	ashba002	ashbyan01
asheral01	1991	10	4	USA	FL	Lakeland							Alec	Asher	Alec Edward	230	76	R	R	2015-08-30	2017-06-13	ashea001	asheral01
ashfotu01	1954	12	4	USA	TN	Memphis							Tucker	Ashford	Thomas Steven	195	73	R	R	1976-09-21	1984-05-14	ashft001	ashfotu01
ashke01	1901	9	16	USA	WV	Anmoore	1979	11	15	USA	WV	Clarksburg	Ken	Ash	Kenneth Lowther	165	71	R	R	1925-04-17	1930-09-26	ash-k101	ashke01
ashlebi01	1970	7	11	USA	MI	Trenton							Billy	Ashley	Billy Manual	220	79	R	R	1992-09-01	1998-07-30	ashlb001	ashlebi01
ashlene01	1984	8	14	USA	IN	Vincennes							Nevin	Ashley	Nevin Robert	245	73	R	R	2015-09-09	2015-10-02	ashln001	ashlene01
asmusto01	1878	9	26	USA	IL	Chicago	1963	8	21	USA	IL	Arlington Heights	Tom	Asmussen	Thomas William		71		R	1907-08-10	1907-08-19	asmut101	asmusto01
asprobo01	1938	6	19	USA	NY	Brooklyn							Bob	Aspromonte	Robert Thomas	170	74	R	R	1956-09-19	1971-09-28	asprb101	asprobo01
asproke01	1931	9	22	USA	NY	Brooklyn							Ken	Aspromonte	Kenneth Joseph	180	72	R	R	1957-09-02	1963-06-21	asprk101	asproke01
asselbr01	1953	9	23	USA	CA	Santa Barbara							Brian	Asselstine	Brian Hanly	175	73	L	R	1976-09-14	1981-10-03	asseb101	asselbr01
assenpa01	1960	12	10	USA	MI	Detroit							Paul	Assenmacher	Paul Andre	195	75	L	L	1986-04-12	1999-10-03	assep001	assenpa01
astacez01	1979	11	4	D.R.	Hato Mayor	Hato Mayor del Rey							Ezequiel	Astacio	Ezequiel F.	200	75	R	R	2005-05-03	2006-05-10	astae001	astacez01
astacpe01	1968	11	28	D.R.	Hato Mayor	Hato Mayor del Rey							Pedro	Astacio	Pedro Julio	174	74	R	R	1992-07-03	2006-09-27	astap001	astacpe01
astinba01	1991	10	22	USA	AR	Forrest City							Barrett	Astin	Barrett	225	73	R	R	2017-04-03	2017-05-14		astinba01
astrojo01	1922	9	1	USA	IL	East Alton	2013	5	3	USA	FL	Boca Raton	Joe	Astroth	Joseph Henry	187	69	R	R	1945-08-13	1956-05-13	astrj101	astrojo01
asuajca01	1991	11	2	Venezuela	Lara	Barquisimeto							Carlos	Asuaje	Carlos A.	158	69	L	R	2016-09-21	2017-05-24	asuac001	asuajca01
atchisc01	1976	3	29	USA	TX	Denton							Scott	Atchison	Scott Barham	200	74	R	R	2004-07-31	2015-06-22	atchs001	atchisc01
atchlju01	1973	9	5	USA	WA	Sedro-Woolley							Justin	Atchley	Justin Scott	215	75	L	L	2001-04-07	2001-07-12	atchj001	atchlju01
atherch01	1873	11	19	USA	NJ	New Brunswick	1935	12	17	Austria		Vienna	Charlie	Atherton	Charles Morgan Herbert	160	70	R	R	1899-05-30	1899-08-22	athec101	atherch01
atherke01	1959	2	19	USA	VA	Newport News							Keith	Atherton	Keith Rowe	200	76	R	R	1983-07-14	1989-08-05	athek001	atherke01
atilalu01	1985	5	10	P.R.		Santurce							Luis	Atilano	Luis A.	220	74	R	R	2010-04-23	2010-07-20	atill001	atilalu01
atkinal01	1861	3	9	USA	IL	Clinton	1952	6	17	USA	MO	McNatt	Al	Atkinson	Albert Wright	165	71	R	R	1884-05-01	1887-08-13	atkia101	atkinal01
atkinbi01	1954	10	4	CAN	ON	Chatham							Bill	Atkinson	William Cecil Glenn	165	67	L	R	1976-09-18	1979-09-26	atkib101	atkinbi01
atkined01	1851			USA	MD	Baltimore							Ed	Atkinson	Edward					1873-10-22	1873-10-23	atkie101	atkined01
atkinga01	1979	12	12	USA	CA	Orange							Garrett	Atkins	Garrett Bernard	190	74	R	R	2003-08-03	2010-06-25	atkig001	atkinga01
atkinja01	1921	3	10	USA	AL	Birmingham	2009	2	28	USA	AL	Hanceville	James	Atkins	James Curtis	205	75	L	R	1950-09-29	1952-05-10	atkij101	atkinja01
atkinle01	1904	6	4	USA	IL	Chicago	1961	2	12	USA	IL	Chicago	Lefty	Atkinson	Hubert Burley	149	66	L	L	1927-08-05	1927-08-05	atkil101	atkinle01
atkinmi01	1985	10	1	USA	NC	Browns Summit							Mitch	Atkins	Mitchell Shane	225	76	R	R	2009-07-29	2011-07-17	atkim001	atkinmi01
atkinto01	1887	12	9	USA	NE	Ponca	1956	5	7	USA	OH	Cleveland	Tommy	Atkins	Francis Montgomery	165	70	L	L	1909-10-02	1910-09-28	atkit101	atkinto01
attredi01	1897	4	8	USA	IL	Chicago	1964	7	5	USA	IL	Chicago	Dick	Attreau	Richard Gilbert	160	72	L	L	1926-09-14	1927-09-28	attrd101	attredi01
atwelto01	1924	3	8	USA	VA	Leesburg	2003	1	25	USA	VA	Purcellville	Toby	Atwell	Maurice Dailey	185	69	L	R	1952-04-15	1956-09-28	atwet101	atwelto01
atwoobi01	1911	9	25	USA	GA	Rome	1993	9	14	USA	TX	Snyder	Bill	Atwood	William Franklin	190	71	R	R	1936-04-15	1940-09-29	atwob101	atwoobi01
atzja01	1879	7	1	USA	DC	Washington	1945	5	22	USA	LA	New Orleans	Jake	Atz	Jacob Henry	160	69	R	R	1902-09-24	1909-09-30	atz-j101	atzja01
aubreha01	1881	7	5	USA	MO	St. Joseph	1953	9	18	USA	MD	Baltimore	Chub	Aubrey	Harry Herbert	130	67	R	R	1903-04-22	1903-09-27	aubrc101	aubreha01
aubremi01	1982	4	15	USA	LA	Shreveport							Michael	Aubrey	Robert Michael	190	72	L	L	2008-05-17	2009-10-04	aubrm001	aubremi01
aucoide01	1970	3	27	CAN	QC	Lachine							Derek	Aucoin	Derek Alfred	235	79	R	R	1996-05-21	1996-05-25	aucod001	aucoide01
auderi01	1971	7	13	USA	CA	Van Nuys							Rich	Aude	Richard Thomas	180	77	R	R	1993-09-09	1996-05-15	auder001	auderi01
auerbri01	1950	2	15	USA	CA	Woodland Hills							Rick	Auerbach	Frederick Steven	165	72	R	R	1971-04-13	1981-08-12	auerr101	auerbri01
augenbr01	1986	7	11	USA	FL	Sebastian							Bryan	Augenstein	Bryan Christopher	230	78	R	R	2009-05-13	2011-04-12	augeb001	augenbr01
augusda01	1949	11	28	USA	WV	Follansbee							Dave	Augustine	David Ralph	174	74	R	R	1973-09-03	1974-10-02	augud101	augusda01
augusdo01	1963	7	3	USA	CA	Inglewood							Don	August	Donald Glenn	190	75	R	R	1988-06-02	1991-10-01	augud001	augusdo01
augusje01	1952	7	24	USA	WI	Kewaunee							Jerry	Augustine	Gerald Lee	183	72	L	L	1975-09-09	1984-04-11	auguj001	augusje01
aukerel01	1910	9	21	USA	KS	Norcatur	2006	8	4	USA	FL	Vero Beach	Elden	Auker	Elden LeRoy	194	74	R	R	1933-08-10	1942-09-20	aukee101	aukerel01
auldsle01	1920	12	28	USA	LA	Farmerville	1999	10	13	USA	TX	Hondo	Tex	Aulds	Leycester Doyle	185	74	R	R	1947-05-25	1947-06-22	auldt101	auldsle01
aultdo01	1950	3	9	USA	TX	Beaumont	2004	12	22	USA	FL	Tarpon Springs	Doug	Ault	Douglas Reagan	200	75	R	L	1976-09-09	1980-10-05	aultd101	aultdo01
aumonph01	1989	1	7	CAN	QC	Gatineau							Phillippe	Aumont	Phillippe	240	79	L	R	2012-08-23	2015-06-19	aumop001	aumonph01
aurilri01	1971	9	2	USA	NY	Brooklyn							Rich	Aurilia	Richard Santo	170	72	R	R	1995-09-06	2009-10-04	aurir001	aurilri01
ausanjo01	1965	12	9	USA	NY	Kingston							Joe	Ausanio	Joseph John	205	73	R	R	1994-07-14	1995-09-15	ausaj001	ausanjo01
ausmubr01	1969	4	14	USA	CT	New Haven							Brad	Ausmus	Bradley David	190	71	R	R	1993-07-28	2010-10-03	ausmb001	ausmubr01
austde01	1940	11	25	USA	NE	Tecumseh							Dennis	Aust	Dennis Kay	180	71	R	R	1965-09-06	1966-05-07	austd101	austde01
austihe01	1844	10		USA	NY		1904	11	2	USA	NY	Amityville	Henry	Austin	Henry C.					1873-04-28	1873-08-07	austh101	austihe01
austije01	1976	10	19	USA	CA	San Bernardino							Jeff	Austin	Jeffrey Wellington	185	72	R	R	2001-06-26	2003-05-28	austj002	austije01
austiji01	1879	12	8	United Kingdom	Swansea	Swansea	1965	3	6	USA	CA	Laguna Beach	Jimmy	Austin	James Philip	155	67	B	R	1909-04-19	1929-10-06	austj101	austiji01
austiji02	1963	12	7	USA	VA	Farmville							Jim	Austin	James Parker	200	74	R	R	1991-07-04	1993-07-20	austj001	austiji02
austiri01	1946	10	27	USA	WA	Seattle							Rick	Austin	Rick Gerald	190	76	R	L	1970-06-21	1976-06-27	austr101	austiri01
austity01	1991	9	6	USA	GA	Conyers							Tyler	Austin	Christopher Tyler	220	74	R	R	2016-08-13	2016-10-02	austt001	austity01
autryal01	1952	2	29	USA	CA	Modesto							Al	Autry	Albert	225	77	R	R	1976-09-14	1976-09-14	autra101	autryal01
autrych01	1885	1	2	USA	TN	Humboldt	1976	1	16	USA	CA	Santa Rosa	Chick	Autry	William Askew	168	71	L	L	1907-09-18	1909-10-07	autrc101	autrych01
autrych02	1903	3	5	USA	TX	Martindale	1950	1	26	USA	GA	Savannah	Chick	Autry	Martin Gordon	180	72	R	R	1924-04-20	1930-09-18	autrc102	autrych02
avenbr01	1972	3	4	USA	TX	Orange							Bruce	Aven	David Bruce	180	69	R	R	1997-08-27	2002-05-27	avenb001	avenbr01
averiea01	1902	5	21	USA	WA	Snohomish	1983	8	16	USA	WA	Everett	Earl	Averill	Howard Earl	172	69	L	R	1929-04-16	1941-04-25	avere101	averiea01
averiea02	1931	9	9	USA	OH	Cleveland	2015	5	13	USA	WA	Tacoma	Earl	Averill	Earl Douglas	185	70	R	R	1956-04-19	1963-09-26	avere102	averiea02
averyst01	1970	4	14	USA	MI	Trenton							Steve	Avery	Steven Thomas	180	76	L	L	1990-06-13	2003-07-20	avers001	averyst01
averyxa01	1990	1	1	USA	GA	Atlanta							Xavier	Avery	Xavier Tyrone	190	72	L	L	2012-05-13	2012-10-01	averx001	averyxa01
avilaal01	1987	1	29	USA	FL	Hialeah							Alex	Avila	Alexander Thomas	210	71	L	R	2009-08-06	2017-06-16	avila001	avilaal01
avilabo01	1924	4	2	Mexico	Veracruz	Veracruz	2004	10	26	Mexico	Veracruz	Veracruz	Bobby	Avila	Roberto Francisco	175	70	R	R	1949-04-30	1959-09-29	avilb101	avilabo01
avilalu01	1989	7	19	Venezuela	Distrito Federal	Caracas							Luis	Avilan	Luis Armando	225	74	L	L	2012-07-14	2017-06-14	avill001	avilalu01
avilemi01	1981	3	13	USA	NY	New York							Mike	Aviles	Michael Anthony	205	70	R	R	2008-05-29	2017-05-16	avilm001	avilemi01
avilera01	1952	1	22	P.R.		Manati							Ramon	Aviles	Ramon Antonio	155	69	R	R	1977-07-10	1981-10-04	avilr101	avilera01
avreaja01	1920	7	6	USA	TX	Cleburne	1987	6	26	USA	TX	Dallas	Jay	Avrea	James Epherium	175	73	R	R	1950-04-22	1950-05-06	avrej101	avreaja01
axelrdy01	1985	7	30	USA	CA	Santa Barbara							Dylan	Axelrod	Dylan Davis Haines	195	70	R	R	2011-09-07	2015-08-18	axeld001	axelrdy01
axforjo01	1983	4	1	CAN	ON	Simcoe							John	Axford	John Berton	220	77	R	R	2009-09-15	2017-06-15	axfoj001	axforjo01
ayalabe01	1951	2	7	P.R.		Yauco							Benny	Ayala	Benigno	185	73	R	R	1974-08-27	1985-10-02	ayalb001	ayalabe01
ayalabo01	1969	7	8	USA	CA	Ventura							Bobby	Ayala	Robert Joseph	190	74	R	R	1992-09-05	1999-10-02	ayalb002	ayalabo01
ayalalu01	1978	1	12	Mexico	Sinaloa	Los Mochis							Luis	Ayala	Luis Ignacio	205	74	R	R	2003-03-31	2013-09-29	ayall001	ayalalu01
aybarer01	1984	1	14	D.R.	Peravia	Bani							Erick	Aybar	Erick Johan	195	70	B	R	2006-05-16	2017-06-16	aybae001	aybarer01
aybarma01	1972	5	4	D.R.	Peravia	Bani							Manny	Aybar	Manuel Antonio	165	73	R	R	1997-08-04	2005-06-10	aybam001	aybarma01
aybarwi01	1983	3	9	D.R.	Peravia	Bani							Willy	Aybar	Willy Del Jesus	205	71	B	R	2005-08-31	2010-10-03	aybaw001	aybarwi01
aydelja01	1861	7	6	USA	IN	Marion	1926	10	22	USA	MI	Detroit	Jake	Aydelott	Jacob Stuart	180	72	L	R	1884-05-15	1886-07-13	aydej101	aydelja01
ayersbi01	1919	9	27	USA	GA	Newnan	1980	9	24	USA	GA	Newnan	Bill	Ayers	William Oscar	185	75	R	R	1947-04-17	1947-07-13	ayerb101	ayersbi01
ayersdo01	1891	5	21	USA	VA	Snake Creek	1968	5	26	USA	VA	Pulaski	Doc	Ayers	Yancey Wyatt	185	73	R	R	1913-09-09	1921-05-21	ayerd101	ayersdo01
aylwadi01	1925	6	4	USA	MD	Baltimore	1983	6	11	USA	CA	Spring Valley	Dick	Aylward	Richard John	190	72	R	R	1953-05-01	1953-05-20	aylwd101	aylwadi01
ayraubo01	1966	4	27	USA	CA	South Lake Tahoe							Bob	Ayrault	Robert Cunningham	230	76	R	R	1992-06-07	1993-07-25	ayrab001	ayraubo01
ayraujo01	1971	10	8	USA	MI	Rochester							Joe	Ayrault	Joseph Allen	190	75	R	R	1996-09-01	1996-09-29	ayraj001	ayraujo01
azcuejo01	1939	8	18	Cuba	Cienfuegos	Cienfuegos							Joe	Azcue	Jose Joaquin	190	72	R	R	1960-08-03	1972-09-29	azcuj101	azcuejo01
azocaos01	1965	2	21	Venezuela	Sucre	Soro	2010	6	14	Venezuela	Carabobo	Valencia	Oscar	Azocar	Oscar Gregorio	170	73	L	L	1990-07-17	1992-10-04	azoco001	azocaos01
babbch01	1873	2	20	USA	OR	Milwaukie	1954	3	19	USA	OR	Portland	Charlie	Babb	Charles Amos	165	70	B	R	1903-04-17	1905-09-02	babbc101	babbch01
babcobo01	1949	8	25	USA	PA	New Castle							Bob	Babcock	Robert Ernest	210	77	R	R	1979-07-22	1981-06-11	babcb101	babcobo01
babelo01	1928	1	11	USA	IA	Pisgah	1984	2	14	USA	NE	Omaha	Loren	Babe	Loren Rolland	180	70	L	R	1952-08-19	1953-09-27	babel101	babelo01
babicjo01	1913	5	14	USA	CA	Albion	2001	1	19	USA	CA	Richmond	Johnny	Babich	John Charles	185	73	R	R	1934-06-19	1941-08-28	babij101	babicjo01
babinch01	1895	5	4	USA	RI	Cranston	1957	3	22	USA	RI	Providence	Charlie	Babington	Charles Percy	170	72	R	R	1915-07-20	1915-09-26	babic101	babinch01
babitsh01	1959	3	9	USA	CA	Oakland							Shooty	Babitt	Mack Neal	174	68	R	R	1981-04-09	1981-09-04	babis101	babitsh01
backebr01	1978	4	5	USA	TX	Galveston							Brandon	Backe	Brandon Allen	182	72	R	R	2002-07-19	2009-06-18	backb001	backebr01
backmle01	1888	3	20	USA	OH	Cleves	1975	11	8	USA	OH	Cincinnati	Les	Backman	Lester John	195	72	R	R	1909-07-03	1910-08-28	backl101	backmle01
backmwa01	1959	9	22	USA	OR	Hillsboro							Wally	Backman	Walter Wayne	160	69	B	R	1980-09-02	1993-05-14	backw001	backmwa01
baconed01	1895	4	8	USA	KY	Frankfort	1963	10	2	USA	KY	Louisville	Eddie	Bacon	Edgar Suter	158	68			1917-08-13	1917-08-20	bacoe101	baconed01
bacsimi01	1952	4	1	USA	TX	Dallas							Mike	Bacsik	Michael James	180	74	R	R	1975-06-15	1980-08-09	bacsm101	bacsimi01
bacsimi02	1977	11	11	USA	TX	Dallas							Mike	Bacsik	Michael Joseph	225	74	L	L	2001-08-05	2007-09-30	bacsm001	bacsimi02
baczefr01	1926	5	15	USA	MN	St. Paul	1976	11	14	USA	CA	Culver City	Fred	Baczewski	Frederic John	185	74	L	L	1953-04-26	1955-04-16	baczf101	baczefr01
badenbu01	1983	2	8	USA	GA	Atlanta							Burke	Badenhop	Burke Heinrich	205	77	R	R	2008-04-09	2015-10-03	badeb001	badenbu01
baderar01	1886	9	21	USA	MO	St. Louis	1957	4	5	USA	MO	St. Louis	Art	Bader	Arthur Herman	170	70	R	R	1904-08-02	1904-08-03	badea101	baderar01
baderlo01	1888	4	27	USA	IL	Bader	1973	6	2	USA	KS	Le Roy	King	Bader	Lore Verne	175	72	L	R	1912-09-30	1918-07-18	badek101	baderlo01
badgrre01	1902	12	1	USA	WA	Orillia	1998	7	13	USA	WA	Kent	Red	Badgro	Morris Hiram	190	72	L	R	1929-06-20	1930-09-18	badgr101	badgrre01
baeched01	1907	5	15	USA	OK	Paden	1957	8	15	USA	IL	Grafton	Ed	Baecht	Edward Joseph	195	75	R	R	1926-04-24	1937-09-03	baece101	baeched01
baekch01	1980	5	29	South Korea	Busan	Busan							Cha-Seung	Baek	Cha-Seung	190	76	R	R	2004-08-08	2008-09-28	baekc001	baekch01
baergca01	1968	11	4	P.R.		Santurce							Carlos	Baerga	Carlos Obed	165	71	B	R	1990-04-14	2005-09-30	baerc001	baergca01
baezbe01	1977	5	6	D.R.	Monsenor Nouel	Bonao							Benito	Baez	Benito	160	72	L	L	2001-08-25	2001-10-05	baezb001	baezbe01
baezda01	1977	9	10	Cuba	Pinar del Rio	Pinar del Rio							Danys	Baez	Danys G.	225	75	R	R	2001-05-13	2011-07-16	baezd001	baezda01
baezja01	1992	12	1	P.R.		Bayamon							Javier	Baez	Ednel Javier	190	72	R	R	2014-08-05	2017-06-14	baezj001	baezja01
baezjo01	1953	12	31	D.R.	San Cristobal	San Cristobal							Jose	Baez	Jose Antonio	160	68	R	R	1977-04-06	1978-06-06	baezj101	baezjo01
baezke01	1967	1	10	USA	NY	Brooklyn							Kevin	Baez	Kevin Richard	160	72	R	R	1990-09-03	1993-10-03	baezk001	baezke01
baezpe01	1988	3	11	D.R.	Peravia	Bani							Pedro	Baez	Pedro Alberys	230	72	R	R	2014-05-05	2017-06-14	baezp001	baezpe01
bagbyji01	1889	10	5	USA	GA	Barnett	1954	7	28	USA	GA	Marietta	Jim	Bagby	James Charles Jacob	170	72	B	R	1912-04-22	1923-09-07	bagbj101	bagbyji01
bagbyji02	1916	9	8	USA	OH	Cleveland	1988	9	2	USA	GA	Marietta	Jim	Bagby	James Charles Jacob	170	74	R	R	1938-04-18	1947-09-25	bagbj102	bagbyji02
bagwebi01	1895	2	24	USA	LA	Choudrant	1976	10	5	USA	LA	Choudrant	Bill	Bagwell	William Mallory	175	73	L	L	1923-04-17	1925-09-26	bagwb101	bagwebi01
bagweje01	1968	5	27	USA	MA	Boston							Jeff	Bagwell	Jeffrey Robert	195	72	R	R	1991-04-08	2005-10-02	bagwj001	bagweje01
bahnsst01	1944	12	15	USA	IA	Council Bluffs							Stan	Bahnsen	Stanley Raymond	185	74	R	R	1966-09-09	1982-10-02	bahns101	bahnsst01
bahred01	1919	10	16	CAN	SK	Rouleau	2007	4	6	USA	WA	Seattle	Ed	Bahr	Edson Garfield	172	73	R	R	1946-05-01	1947-07-04	bahre101	bahred01
bahrefr01	1858			USA	NY	Poughkeepsie	1888	3	30	USA	NY	Poughkeepsie	Frank	Bahret	Franklin F.	184	73			1884-04-17	1884-04-22	bahrf101	bahrefr01
baichgr01	1889	12	10	USA	IL	Toledo	1956	6	28	USA	CA	San Jose	Grover	Baichley	Grover Cleveland	165	68	R	R	1914-08-24	1914-09-04	baicg101	baichgr01
bailean01	1984	5	31	USA	NJ	Voorhees							Andrew	Bailey	Andrew Scott	240	75	R	R	2009-04-06	2017-04-09	baila001	bailean01
bailebi01	1888	4	12	USA	AR	Fort Smith	1926	11	2	USA	TX	Houston	Bill	Bailey	William F.	165	71	L	L	1907-09-17	1922-06-26	bailb101	bailebi01
bailebi02	1881	11	19	USA	OH	Shawnee	1967	10	27	USA	WA	Seattle	Bill	Bailey	Harry Lewis	170	70	L	R	1911-04-21	1911-05-27	bailb102	bailebi02
bailebo01	1942	10	13	USA	CA	Long Beach							Bob	Bailey	Robert Sherwood	180	73	R	R	1962-09-14	1978-10-02	bailb103	bailebo01
baileco01	1971	1	24	USA	IL	Herrin							Cory	Bailey	Philip Cory	195	72	R	R	1993-09-01	2002-07-03	bailc001	baileco01
baileed01	1931	4	15	USA	TN	Strawberry Plains	2007	3	23	USA	TN	Knoxville	Ed	Bailey	Lonas Edgar	205	74	L	R	1953-09-26	1966-04-26	baile101	baileed01
bailefr01	1895	8	16	USA	WV	Mount Hope	1972	8	16	USA	WV	Huntington	Fred	Bailey	Frederick Middleton	150	71	L	L	1916-08-19	1918-04-27	bailf101	bailefr01
bailege01	1893	11	25	USA	TX	Pearsall	1973	11	14	USA	TX	Houston	Gene	Bailey	Arthur Eugene	160	68	R	R	1917-09-10	1924-06-03	bailg101	bailege01
baileha01	1876	11	24	USA	MI	Palmyra	1922	7	10	USA	OH	Toledo	Harvey	Bailey	Harvey Francis	160	72		L	1899-06-30	1900-05-21	bailh102	baileha01
baileho01	1957	7	31	USA	MI	Grand Haven							Howard	Bailey	Howard Lee	195	72	R	L	1981-04-12	1983-10-01	bailh101	baileho01
baileho02	1986	5	3	USA	TX	La Grange							Homer	Bailey	David Dewitt	223	76	R	R	2007-06-08	2016-08-28	bailh001	baileho02
baileje01	1978	11	19	USA	WA	Longview							Jeff	Bailey	Jeffrey Todd	200	74	R	R	2007-07-06	2009-07-04	bailj001	baileje01
baileji01	1934	12	16	USA	TN	Strawberry Plains							Jim	Bailey	James Hopkins	210	74	B	L	1959-09-10	1959-09-20	bailj101	baileji01
baileki01	1869	11	22	USA	VA	Tunstall Station	1917	11	19	USA	GA	Macon	King	Bailey	Linwood Clifton	185	72	L	L	1895-09-21	1895-09-21	bailk101	baileki01
bailema01	1961	11	4	USA	MO	Springfield							Mark	Bailey	John Mark	195	77	B	R	1984-04-27	1992-08-22	bailm001	bailema01
bailero01	1970	10	3	USA	FL	Chattahoochee							Roger	Bailey	Charles Roger	180	73	R	R	1995-04-27	1997-09-24	bailr001	bailero01
bailesc01	1961	12	18	USA	OH	Chillicothe							Scott	Bailes	Scott Alan	170	74	L	L	1986-04-09	1998-09-27	bails001	bailesc01
bailest01	1942	2	12	USA	NY	Bronx							Steve	Bailey	Steven John	194	73	R	R	1967-04-14	1968-09-26	bails102	bailest01
bailesw01	1895	2	12	USA	IL	Joliet	1939	9	27	USA	IL	Joliet	Sweetbread	Bailey	Abraham Lincoln	184	72	R	R	1919-05-23	1921-06-11	bails101	bailesw01
bailobo01	1951	7	10	USA	PA	Connellsville							Bob	Bailor	Robert Michael	170	71	R	R	1975-09-06	1985-10-06	bailb001	bailobo01
baineha01	1959	3	15	USA	MD	Easton							Harold	Baines	Harold Douglas	175	74	L	L	1980-04-10	2001-09-27	bainh001	baineha01
bainlo01	1922	7	4	USA	MN	Staples	1996	11	24	USA	WI	Chetek	Loren	Bain	Herbert Loren	190	72	R	R	1945-06-23	1945-07-04	bainl101	bainlo01
bairdal01	1895	6	2	USA	TX	Cleburne	1976	11	27	USA	LA	Shreveport	Al	Baird	Albert Wells	160	69	R	R	1917-09-10	1919-09-28	baira101	bairdal01
bairdbo01	1940	1	16	USA	TN	Knoxville	1974	4	11	USA	TN	Chattanooga	Bob	Baird	Robert Allen	195	76	L	L	1962-09-03	1963-09-27	bairb101	bairdbo01
bairddo01	1891	9	27	USA	MO	St. Charles	1967	6	13	USA	GA	Thomasville	Doug	Baird	Howard Douglas	148	69	R	R	1915-04-17	1920-10-02	baird101	bairddo01
bairdo01	1949	8	22	USA	OH	Defiance							Doug	Bair	Charles Douglas	170	72	R	R	1976-09-13	1990-10-03	baird001	bairdo01
baislje01	1982	12	19	USA	FL	Tampa							Jeff	Baisley	Jeffrey Scot	225	75	R	R	2008-09-09	2008-09-28	baisj001	baislje01
bajenje01	1978	3	21	USA	CA	Pomona							Jeff	Bajenaru	Jeffrey Michael	190	73	R	R	2004-09-04	2006-08-07	bajej001	bajenje01
bakelje01	1864	4	17	USA	NJ	Blackwood	1915	2	17	USA	PA	Philadelphia	Jersey	Bakley	Edward Enoch	170	68	R	R	1883-05-11	1891-08-20	bakej102	bakelje01
bakenda01	1945	3	5	USA	OH	Columbus	2014	7	30	USA	OH	Galena	Dave	Bakenhaster	David Lee	168	70	R	R	1964-06-20	1964-07-22	baked103	bakenda01
bakeral01	1906	2	28	USA	MS	Batesville	1982	11	6	USA	TX	Kenedy	Al	Baker	Albert Jones	170	71	R	R	1938-08-20	1938-08-29	bakea101	bakeral01
bakerbi01	1911	2	22	USA	NC	Paw Creek	2006	4	13	USA	SC	Myrtle Beach	Bill	Baker	William Presley	200	72	R	R	1940-05-04	1949-08-01	bakeb101	bakerbi01
bakerbo01	1878	7	17	USA	NY	Troy	1940	8	17	USA	NY	New York	Bock	Baker	Charles	181	69		L	1901-04-28	1901-05-13	bakeb102	bakerbo01
bakerch01	1856	1	15	USA	MA	West Boylston	1937	1	15	USA	NH	Goffstown	Charlie	Baker	Charles Arthur	140	64	R	R	1884-08-01	1884-08-27	bakec102	bakerch01
bakerch02	1952	12	6	USA	WA	Seattle							Chuck	Baker	Charles Joseph	180	71	R	R	1978-04-07	1981-10-04	bakec101	bakerch02
bakerda01	1956	11	25	USA	IA	Lacona							Dave	Baker	David Glenn	185	72	L	R	1982-09-12	1982-09-29	baked101	bakerda01
bakerde01	1892	5	3	USA	OR	Sherwood	1973	9	11	USA	TX	Olmos Park	Del	Baker	Delmer David	176	71	R	R	1914-04-16	1916-09-30	baked102	bakerde01
bakerdo01	1961	4	3	USA	CA	Fullerton							Doug	Baker	Douglas Lee	165	69	B	R	1984-07-02	1990-04-12	baked001	bakerdo01
bakerdu01	1949	6	15	USA	CA	Riverside							Dusty	Baker	Johnnie B.	183	74	R	R	1968-09-07	1986-10-04	baked002	bakerdu01
bakerer01	1875	8	8	USA	MI	Concord	1945	10	25	USA	MI	Homer	Ernie	Baker	Earnest Gould	160	70	R	R	1905-08-18	1905-08-18	bakee101	bakerer01
bakerfl01	1916	10	10	USA	VA	Luray	2004	11	16	USA	OH	Youngstown	Floyd	Baker	Floyd Wilton	160	69	L	R	1943-05-04	1955-05-04	bakef103	bakerfl01
bakerfr01	1886	3	13	USA	MD	Trappe	1963	6	28	USA	MD	Trappe	Home Run	Baker	John Franklin	173	71	L	R	1908-09-21	1922-09-29	bakef102	bakerfr01
bakerfr02	1944	1	11	USA	FL	Bartow	2010	1	28	USA	NC	Raleigh	Frank	Baker	Frank	180	70	L	R	1969-07-27	1971-09-29	bakef104	bakerfr02
bakerfr03	1946	10	29	USA	MS	Meridian							Frank	Baker	Frank Watts	178	74	L	R	1970-08-09	1974-10-02	bakef101	bakerfr03
bakerge01	1857	8	20	USA	MO	St. Louis	1915	1	29	USA	MO	St. Louis	George	Baker	George F.	162	71			1883-05-24	1886-05-01	bakeg102	bakerge01
bakerge02	1925	6	15	USA	IA	Davenport	1999	12	1	USA	IA	Davenport	Gene	Baker	Eugene Walter	170	73	R	R	1953-09-20	1961-06-10	bakeg101	bakerge02
bakerho01	1888	3	1	USA	CT	Bridgeport	1964	1	16	USA	CT	Bridgeport	Howard	Baker	Howard Francis	175	71	R	R	1912-08-11	1915-10-06	bakeh101	bakerho01
bakerja01	1950	5	4	USA	AL	Birmingham							Jack	Baker	Jack Edward	225	77	R	R	1976-09-11	1977-06-08	bakej103	bakerja01
bakerje01	1888	6	3	USA	WA	Anderson Island	1972	9	26	USA	WA	Tacoma	Jesse	Baker	Jesse Ormond	188	71	L	L	1911-04-23	1911-09-04	bakej101	bakerje01
bakerje02	1895	3	4	USA	OH	Cleveland	1976	7	29	USA	CA	West Los Angeles	Jesse	Baker	Jesse	140	64	R	R	1919-09-14	1919-09-14	bakej104	bakerje02
bakerje03	1981	6	21	Germany	Bavaria	Bad Kissingen							Jeff	Baker	Jeffrey Glen	220	74	R	R	2005-04-04	2015-07-07	bakej001	bakerje03
bakerjo01	1981	1	20	USA	CA	Alameda							John	Baker	John David	215	73	L	R	2008-07-09	2014-09-28	bakej002	bakerjo01
bakerki01	1869	6	24	USA	IN	Aurora	1927	4	13	USA	KY	Covington	Kirtley	Baker	Kirtley	160	69	R	R	1890-05-07	1899-06-14	bakek101	bakerki01
bakerne01	1904	4	30	USA	TX	La Porte	1982	1	5	USA	TX	Houston	Neal	Baker	Neal Vernon	175	73	R	R	1927-06-26	1927-07-26	baken102	bakerne01
bakerno01	1862	10	14	USA	PA	Philadelphia	1949	2	20	USA	NJ	Hurffville	Norm	Baker	Norman Leslie					1883-05-21	1890-08-30	baken101	bakerno01
bakerph01	1856	9	19	USA	PA	Philadelphia	1940	6	4	USA	DC	Washington	Phil	Baker	Philip	152	68	L	L	1883-05-01	1886-09-02	bakep101	bakerph01
bakersc01	1970	5	18	USA	CA	San Jose							Scott	Baker	Scott	175	74	L	L	1995-07-17	1995-07-17	bakes001	bakersc01
bakersc02	1981	9	19	USA	LA	Shreveport							Scott	Baker	Timothy Scott	215	76	R	R	2005-05-07	2015-05-02	bakes002	bakersc02
bakerst01	1956	8	30	USA	OR	Eugene							Steve	Baker	Steven Byrne	185	72	R	R	1978-05-25	1983-09-27	bakes101	bakerst01
bakerto01	1913	6	11	USA	TX	Nursery	1991	1	3	USA	TX	Fort Worth	Tom	Baker	Thomas Calvin	180	73	R	R	1935-08-15	1938-09-24	baket103	bakerto01
bakerto02	1934	5	6	USA	WA	Port Townsend	1980	3	9	USA	WA	Port Townsend	Tom	Baker	Thomas Henry	195	72	L	L	1963-08-02	1963-09-14	baket102	bakerto02
bakertr01	1891	11	7	USA	OR	Pendleton	1975	3	14	USA	CA	Placerville	Tracy	Baker	Trace Lee	180	73	R	R	1911-06-19	1911-06-19	baket101	bakertr01
bakopa01	1972	6	20	USA	LA	Lafayette							Paul	Bako	Gabor Paul	205	74	L	R	1998-04-30	2009-10-04	bakop001	bakopa01
balasmi01	1910	5	9	USA	MA	Lowell	1996	10	15	USA	MA	Westford	Mike	Balas	Mitchell Francis	195	72	R	R	1938-04-27	1938-04-27	balam101	balasmi01
balazjo01	1950	11	24	CAN	ON	Toronto							John	Balaz	John Lawrence	180	75	R	R	1974-09-10	1975-09-28	balaj101	balazjo01
balbost01	1957	1	16	USA	MA	Brockton							Steve	Balboni	Stephen Charles	225	75	R	R	1981-04-22	1993-10-02	balbs001	balbost01
balcebo01	1925	8	1	USA	CA	San Pedro	1990	1	5	USA	CA	San Pedro	Bobby	Balcena	Robert Rudolph	160	67	R	L	1956-09-16	1956-09-29	balcb101	balcebo01
baldero01	1981	9	25	USA	RI	Woonsocket							Rocco	Baldelli	Rocco Dan	190	76	R	R	2003-03-31	2010-10-03	baldr001	baldero01
baldsja01	1936	10	16	USA	OH	Greenville							Jack	Baldschun	Jack Edward	175	73	R	R	1961-04-28	1970-08-21	baldj101	baldsja01
baldwbi01	1948	6	9	USA	VA	Tazewell	2011	6	28	USA	OH	Hudson	Billy	Baldwin	Robert Harvey	175	72	L	L	1975-07-29	1976-09-28	baldb101	baldwbi01
baldwda01	1938	3	30	USA	AZ	Tucson							Dave	Baldwin	David George	200	74	R	R	1966-09-06	1973-08-07	baldd101	baldwda01
baldwfr01	1928	12	25	USA	NJ	High Bridge	2004	11	18	USA	OH	Beaver	Frank	Baldwin	Frank DeWitt	195	71	R	R	1953-04-22	1953-09-05	baldf101	baldwfr01
baldwha01	1900	6	3	USA	MD	Baltimore	1958	1	23	USA	MD	Baltimore	Harry	Baldwin	Howard Edward	160	71	R	R	1924-05-04	1925-04-24	baldh101	baldwha01
baldwhe01	1894	6	13	USA	PA	Chadds Ford	1964	2	24	USA	PA	West Chester	Henry	Baldwin	Henry Clay	180	71	R	R	1927-05-22	1927-06-03	baldh102	baldwhe01
baldwja01	1971	7	15	USA	NC	Pinehurst							James	Baldwin	James	210	75	R	R	1995-04-30	2005-09-29	baldj002	baldwja01
baldwje01	1965	9	5	USA	DE	Milford							Jeff	Baldwin	Jeffrey Allen	180	73	L	L	1990-05-22	1990-06-04	baldj001	baldwje01
baldwki01	1864	11	1	USA	KY	Newport	1897	7	10	USA	OH	Cincinnati	Kid	Baldwin	Clarence Geoghan	147	66	R	R	1884-07-27	1890-09-16	baldk101	baldwki01
baldwla01	1859	4	8	USA	NY	Oramel	1937	3	7	USA	MI	Hastings	Lady	Baldwin	Charles B.	160	71	R	L	1884-09-30	1890-06-26	baldl101	baldwla01
baldwma01	1863	10	29	USA	PA	Pittsburgh	1929	11	10	USA	PA	Pittsburgh	Mark	Baldwin	Marcus Elmore	190	72	R	R	1887-05-02	1893-09-30	baldm101	baldwma01
baldwof01	1881	11	3	USA	MI	Carson City	1942	2	16	USA	CA	Los Angeles	Orson	Baldwin	Orson Frederick	185			R	1908-09-06	1908-09-22	baldo101	baldwo.01
baldwre01	1954	8	19	USA	MI	River Rouge							Reggie	Baldwin	Reginald Conrad	195	73	R	R	1978-05-25	1979-09-24	baldr102	baldwre01
baldwri01	1953	6	1	USA	CA	Fresno							Rick	Baldwin	Rickey Alan	180	75	L	R	1975-04-10	1977-10-02	baldr101	baldwri01
balejo01	1974	5	22	USA	MD	Cheverly							John	Bale	John Robert	210	76	L	L	1999-09-30	2009-10-02	balej001	balejo01
balenmi01	1886	7	3	USA	OK	Calumet	1955	8	4	USA	OK	Altus	Mike	Balenti	Michael Richard	175	71	R	R	1911-07-19	1913-09-22	balem101	balenmi01
balenwl01	1984	7	2	Curacao		Willemstad							Wladimir	Balentien	Wladimir Ramon	220	74	R	R	2007-09-04	2009-10-02	balew001	balenwl01
balesco01	1986	6	6	USA	CA	Huntington Beach							Collin	Balester	Collin Thomas	190	76	R	R	2008-07-01	2015-10-02	balec001	balesco01
balesle01	1944	12	4	USA	CA	Los Angeles							Lee	Bales	Wesley Owen	165	70	B	R	1966-08-07	1967-10-01	balel101	balesle01
balfogr01	1977	12	30	Australia	New South Wales	Sydney							Grant	Balfour	Grant Robert	200	74	R	R	2001-07-22	2015-04-18	balfg001	balfogr01
ballaje01	1963	8	13	USA	MT	Billings							Jeff	Ballard	Jeffrey Scott	195	75	L	L	1987-05-09	1994-07-08	ballj002	ballaje01
ballar01	1872	4		USA	IN	Madison	1915	12	26	USA	IL	Chicago	Art	Ball	Arthur	168			R	1894-08-01	1898-10-15	balla101	ballar01
balleja01	1960	10	6	USA	OR	Stayton							Jay	Baller	Jay Scott	215	78	R	R	1982-09-19	1992-08-31	ballj001	balleja01
ballepe01	1894	2	6	USA	SC	Gilreath Mill	1948	12	8	USA	SC	Gantt	Pelham	Ballenger	Pelham Ashby	160	71	R	R	1928-05-07	1928-05-12	ballp101	ballepe01
ballima01	1949	1	31	USA	CA	Glendale	2014	6	13	USA	FL	Okeechobee	Mark	Ballinger	Mark Alan	205	78	R	R	1971-08-06	1971-09-25	ballm101	ballima01
ballje01	1969	4	17	USA	CA	Merced							Jeff	Ball	Jeffery D.	185	70	R	R	1998-06-10	1998-06-16	ballj003	ballje01
ballji01	1884	2	22	USA	MD	Harford County	1963	4	7	USA	CA	Glendale	Jim	Ball	James Chandler	175	71	R	R	1907-09-21	1908-06-17	ballj101	ballji01
ballne01	1881	4	22	USA	MI	Grand Haven	1957	10	15	USA	CT	Bridgeport	Neal	Ball	Cornelius	145	67	R	R	1907-09-12	1913-06-30	balln101	ballne01
ballowi01	1897	11	30	USA	KY	Mount Morgan	1963	1	29	USA	CA	San Francisco	Win	Ballou	Noble Winfred	170	70	R	R	1925-08-24	1929-09-15	ballw101	ballowi01
balsato01	1937	11	21	USA	NY	Brooklyn							Tony	Balsamo	Anthony Fred	185	74	R	R	1962-04-14	1962-06-26	balst101	balsato01
bambege01	1923	8	1	USA	NY	Staten Island	2004	4	4	USA	FL	North Redington Beach	George	Bamberger	George Irvin	175	72	R	R	1951-04-19	1959-04-22	bambg101	bambege01
bambeha01	1924	10	29	USA	PA	Lebanon	2010	11	14	USA	PA	Reading	Hal	Bamberger	Harold Earl	173	72	L	R	1948-09-15	1948-10-03	bambh101	bambeha01
banckst01	1853			USA	PA	Philadelphia	1888	10	7	USA	PA	Philadelphia	Studs	Bancker	John V.					1875-04-19	1875-06-05	bancs101	banckst01
bancrda01	1891	4	20	USA	IA	Sioux City	1972	10	9	USA	WI	Superior	Dave	Bancroft	David James	160	69	B	R	1915-04-14	1930-05-31	bancd101	bancrda01
bancrfr99	1846	5	9	USA	MA	Lancaster	1921	3	30	USA	OH	Cincinnati	Frank	Bancroft	Frank Carter							bancf801	bancrfr99
bandoch01	1956	2	4	USA	OH	Cleveland							Chris	Bando	Christopher Michael	195	72	B	R	1981-08-13	1989-10-01	bandc001	bandoch01
bandosa01	1944	2	13	USA	OH	Cleveland							Sal	Bando	Salvatore Leonard	195	72	R	R	1966-09-03	1981-10-03	bands101	bandosa01
bandyje01	1990	3	26	USA	CA	West Hills							Jett	Bandy	Jett Adam	235	76	R	R	2015-09-14	2017-06-15	bandj001	bandyje01
baneed01	1952	3	22	USA	IL	Chicago							Eddie	Bane	Edward Norman	160	69	R	L	1973-07-04	1976-09-12	banee101	baneed01
baneydi01	1946	11	1	USA	CA	Fullerton							Dick	Baney	Richard Lee	185	72	R	R	1969-07-11	1974-10-02	baned101	baneydi01
banisje01	1964	1	15	USA	OK	Weatherford							Jeff	Banister	Jeffery Todd	200	74	R	R	1991-07-23	1991-07-23	banij001	banisje01
bankhda01	1920	5	3	USA	AL	Empire	1976	5	2	USA	TX	Houston	Dan	Bankhead	Daniel Robert	184	73	R	R	1947-08-26	1951-07-18	bankd101	bankhda01
bankhsc01	1963	7	31	USA	NC	Raleigh							Scott	Bankhead	Michael Scott	175	70	R	R	1986-05-25	1995-07-18	banks001	bankhsc01
banksbi01	1874	2	26	USA	PA	Danville	1936	9	8	USA	PA	Danville	Bill	Yerrick	William John	150	71	R	R	1895-09-27	1896-09-01	bankb102	banksbi01
banksbr01	1970	9	28	USA	AZ	Mesa							Brian	Banks	Brian Glen	200	75	B	R	1996-09-09	2003-09-28	bankb001	banksbr01
bankser01	1931	1	31	USA	TX	Dallas	2015	1	23	USA	IL	Chicago	Ernie	Banks	Ernest	180	73	R	R	1953-09-17	1971-09-26	banke101	bankser01
banksev01	1893	5	25	USA	GA	Barnesville	1970	2	26	USA	GA	Griffin	Bill	Bankston	Wilborn Everett	180	71	L	R	1915-08-05	1915-09-27	bankb101	banksev01
banksge01	1938	9	24	USA	SC	Pacolet Mills	1985	3	1	USA	SC	Spartanburg	George	Banks	George Edward	185	71	R	R	1962-04-15	1966-05-07	bankg101	banksge01
banksjo01	1982	7	18	USA	MD	Baltimore							Josh	Banks	Joshua Charles	215	75	R	R	2007-09-11	2010-06-26	bankj001	banksjo01
bankswe01	1983	11	23	USA	TX	Dallas							Wes	Bankston	Wesley Wade	215	76	R	R	2008-07-02	2008-07-30	bankw002	bankswe01
bankswi01	1969	2	27	USA	NJ	Jersey City							Willie	Banks	Willie Anthony	190	73	R	R	1991-07-31	2002-09-26	bankw001	bankswi01
bannial01	1951	9	3	USA	CA	Montebello							Alan	Bannister	Alan	170	71	R	R	1974-07-13	1985-10-06	banna001	bannial01
bannibr01	1981	2	28	USA	AZ	Scottsdale							Brian	Bannister	Brian Patrick	202	74	R	R	2006-04-05	2010-09-17	bannb001	bannibr01
bannifl01	1955	6	10	USA	SD	Pierre							Floyd	Bannister	Floyd Franklin	190	73	L	L	1977-04-19	1992-08-10	bannf001	bannifl01
banniji01	1865	6	11	USA	NY	New York	1952	10	14	USA	MN	St. Paul	Jim	Banning	James M.	150	66	L	R	1888-09-27	1889-05-11	bannj102	banniji01
bannoji01	1871	5	5	USA	MA	Amesbury	1948	3	24	USA	NJ	Glen Rock	Jimmy	Bannon	James Henry	160	65	R	R	1893-06-15	1896-08-12	bannj101	bannoji01
bannoto01	1869	5	8	USA	MA	Amesbury	1950	1	26	USA	MA	Lynn	Tom	Bannon	Thomas Edward	175	68	R	R	1895-05-10	1896-09-25	bannt101	bannoto01
bantaja01	1925	6	24	USA	KS	Hutchinson	2006	9	17	USA	KS	Hutchinson	Jack	Banta	Jackie Kay	175	74	L	R	1947-09-18	1950-06-21	bantj101	bantaja01
bantzbr01	1987	1	7	USA	TX	Arlington							Brandon	Bantz	Brandon	205	73	R	R	2013-06-08	2013-06-08	bantb001	bantzbr01
banuema01	1991	3	13	Mexico	Durango	Gomez Palacio							Manny	Banuelos	Manuel	215	70	R	L	2015-07-02	2015-09-06	banum001	banuema01
baptitr01	1971	12	30	USA	OR	Forest Grove							Travis	Baptist	Travis Steven	195	72	L	L	1998-08-01	1998-09-23	baptt001	baptitr01
barajro01	1975	9	5	USA	CA	Ontario							Rod	Barajas	Rodrigo Richard	250	74	R	R	1999-09-25	2012-10-03	barar001	barajro01
barbajo01	1992	7	11	USA	FL	Miami							Johnny	Barbato	John Edward	235	73	R	R	2016-04-05	2017-06-07	barbj001	barbajo01
barbare01	1920	6	20	USA	SC	Simpsonville	2003	9	27	USA	SC	Simpsonville	Red	Barbary	Donald Odell	190	75	R	R	1943-05-22	1943-05-22	barbr101	barbare01
barbawa01	1891	8	11	USA	SC	Greenville	1965	10	28	USA	SC	Greenville	Walter	Barbare	Walter Lawrence	162	72	R	R	1914-09-17	1922-10-01	barbw101	barbawa01
barbebr01	1967	8	16	USA	CA	Long Beach							Bret	Barberie	Bret Edward	185	71	B	R	1991-06-16	1996-06-22	barbb001	barbebr01
barbebr02	1973	3	4	USA	OH	Hamilton							Brian	Barber	Brian Scott	175	73	R	R	1995-08-12	1999-08-01	barbb002	barbebr02
barbech01	1854			USA	PA	Philadelphia	1910	11	23	USA	PA	Philadelphia	Charlie	Barber	Charles D.	148	70	R	R	1884-04-17	1884-08-10	barbc101	barbech01
barbeda01	1905	5	7	USA	NC	Greensboro	1968	7	1	USA	NC	Albemarle	Dave	Barbee	David Monroe	178	71	R	R	1926-07-29	1932-09-25	barbd101	barbeda01
barbefr01	1882	2	3	USA	NY	New Town	1965	5	1	USA	FL	Ocala	Frank	Barberich	Frank Frederick	175	70	B	R	1907-09-17	1910-06-16	barbf101	barbefr01
barbeja01	1882	6	10	USA	NY	New York	1969	9	10	USA	WI	Milwaukee	Jap	Barbeau	William Joseph	140	65	R	R	1905-09-27	1910-05-02	barbj101	barbeja01
barbest01	1938	2	22	USA	MD	Takoma Park	2007	2	4	USA	NV	Henderson	Steve	Barber	Stephen David	195	72	L	L	1960-04-21	1974-07-31	barbs102	barbest01
barbest02	1948	3	13	USA	MI	Grand Rapids							Steve	Barber	Steven Lee	190	73	R	R	1970-04-09	1971-05-06	barbs101	barbest02
barbetu01	1893	7	9	USA	TN	Lavinia	1968	10	20	USA	TN	Milan	Turner	Barber	Tyrus Turner	170	71	L	R	1915-08-19	1923-04-30	barbt101	barbetu01
barbiji01	1941	9	15	USA	NY	Schenectady							Jim	Barbieri	James Patrick	155	67	L	R	1966-07-05	1966-09-24	barbj102	barbiji01
barcelo01	1977	8	10	D.R.	San Pedro de Macoris	San Pedro de Macoris							Lorenzo	Barcelo	Lorenzo Antonio	230	76	R	R	2000-07-22	2002-04-19	barcl001	barcelo01
barclcu01	1931	8	22	USA	IL	Chicago	1985	3	25	USA	MT	Missoula	Curt	Barclay	Curtis Cordell	210	75	R	R	1957-04-21	1959-04-16	barcc101	barclcu01
barclge01	1876	5	16	USA	PA	Millville	1909	4	3	USA	PA	Philadelphia	George	Barclay	George Oliver	162	70	R	R	1902-04-17	1905-05-30	barcg101	barclge01
bardda01	1985	6	25	USA	TX	Houston							Daniel	Bard	Daniel Paul	215	76	R	R	2009-05-13	2013-04-27	bardd001	bardda01
bardebr01	1981	4	2	USA	CA	Templeton							Brian	Barden	Brian David	190	71	R	R	2007-04-03	2010-07-02	bardb001	bardebr01
bardjo01	1978	3	30	USA	NY	Ithaca							Josh	Bard	Joshua David	225	75	B	R	2002-08-23	2011-09-17	bardj001	bardjo01
barera01	1949	4	15	USA	FL	Miami	1994	3	29	USA	FL	Miami	Ray	Bare	Raymond Douglas	185	74	R	R	1972-07-30	1977-05-03	barer101	barera01
barfije01	1959	10	29	USA	IL	Joliet							Jesse	Barfield	Jesse Lee	200	73	R	R	1981-09-03	1992-06-17	barfj001	barfije01
barfijo01	1964	10	15	USA	AR	Pine Bluff	2016	12	24	USA	AR	Little Rock	John	Barfield	John David	195	73	L	L	1989-09-07	1991-08-01	barfj002	barfijo01
barfijo02	1982	12	17	Venezuela	Lara	Barquisimeto							Josh	Barfield	Joshua LaRoy	190	72	R	R	2006-04-03	2009-06-25	barfj003	barfijo02
barfocl01	1891	7	8	USA	VA	Richmond	1971	3	11	USA	CA	Highland Park	Clyde	Barfoot	Clyde Raymond	170	72	R	R	1922-04-13	1926-05-24	barfc101	barfocl01
bargagr01	1959	1	27	USA	CA	Inglewood							Greg	Bargar	Greg Robert	185	74	R	R	1983-07-17	1986-10-02	bargg001	bargagr01
bargecy01	1885	5	18	USA	KY	Jamestown	1964	9	23	USA	KY	Columbia	Cy	Barger	Eros Bolivar	160	72	L	R	1906-08-30	1915-10-02	bargc101	bargecy01
barkbr01	1968	8	26	USA	MD	Baltimore							Brian	Bark	Brian Stuart	170	69	L	L	1995-07-06	1995-09-08	barkb001	barkbr01
barkeal01	1839	1	18	USA	IN	Lost Creek	1912	9	15	USA	IL	Rockford	Al	Barker	Alfred L.	162	72			1871-06-01	1871-06-01	barka101	barkeal01
barkean01	1974	9	5	USA	FL	Miami							Andy	Barkett	Andrew Jon	205	73	L	L	2001-05-28	2001-06-24	barka001	barkean01
barkegl01	1971	5	10	USA	NY	Albany							Glen	Barker	Glen F.	180	70	B	R	1999-04-07	2001-10-07	barkg001	barkegl01
barkeke01	1975	7	26	USA	VA	Bristol							Kevin	Barker	Kevin Stewart	195	74	L	L	1999-08-19	2009-10-04	barkk001	barkeke01
barkele01	1955	7	7	USA	KY	Fort Knox							Len	Barker	Leonard Harold	225	77	R	R	1976-09-14	1987-09-26	barkl001	barkele01
barkera01	1936	3	12	USA	WV	Martinsburg							Ray	Barker	Raymond Herrell	192	72	L	R	1960-09-13	1967-05-21	barkr102	barkera01
barkeri01	1972	10	29	USA	MA	Revere							Richie	Barker	Richard Frank	210	74	R	R	1999-04-25	1999-05-05	barkr001	barkeri01
barkese01	1980	5	26	USA	CA	Bakersfield							Sean	Barker	Sean Reed	220	75	R	R	2007-06-06	2007-06-15	barks001	barkese01
barklbr01	1975	12	8	USA	TX	Conroe							Brian	Barkley	Brian Edward	180	74	L	L	1998-05-28	1998-09-27	barkb002	barklbr01
barklje01	1959	11	21	USA	NC	Hickory							Jeff	Barkley	Jeffrey Carver	185	75	B	R	1984-09-16	1985-07-26	barkj001	barklje01
barklre01	1912	9	19	USA	TX	Childress	2000	12	12	USA	TX	Waco	Red	Barkley	John Duncan	160	71	R	R	1937-09-02	1943-08-14	barkr101	barklre01
barklsa01	1858	5	24	USA	WV	Wheeling	1912	4	20	USA	WV	Wheeling	Sam	Barkley	Samuel W.	180	71	R	R	1884-05-01	1889-07-12	barks101	barklsa01
barlial99	1915	4	2	USA	IL	Springfield	1995	12	27	USA	IL	Springfield	Al	Barlick	Albert Joseph	185	71					barla901	barlial99
barlomi01	1948	4	30	USA	NY	Stamford							Mike	Barlow	Michael Roswell	210	78	L	R	1975-06-18	1981-06-08	barlm101	barlomi01
barloto01	1852			USA	NY								Tom	Barlow	Thomas H.					1872-05-02	1875-07-30	barlt101	barloto01
barmebr01	1929	10	23	USA	IN	Vincennes	2014	1	25	USA	NC	Garner	Bruce	Barmes	Bruce Raymond	165	68	L	R	1953-09-13	1953-09-27	barmb101	barmebr01
barmecl01	1979	3	6	USA	IN	Vincennes							Clint	Barmes	Clint Harold	200	73	R	R	2003-09-05	2015-10-04	barmc001	barmecl01
barnaba01	1915	3	2	USA	WV	Clarksburg	1972	5	18	USA	WV	Charleston	Babe	Barna	Herbert Paul	210	74	L	R	1937-09-16	1943-07-28	barnb102	barnaba01
barnach01	1900	6	12	USA	CO	Russell Gulch	1977	8	16	USA	TX	Waco	Charlie	Barnabe	Charles Edward	164	71	L	L	1927-04-14	1928-05-13	barnc101	barnach01
barneau01	1989	12	28	USA	CA	Riverside							Austin	Barnes	Austin Scott	190	70	R	R	2015-05-24	2017-06-15	barna001	barneau01
barnebi01	1858	4	13	USA	MN	Shakopee	1945	7	10	USA	MN	St. Paul	Bill	Barnes	William Horace	175	70			1884-09-27	1884-10-13	barnb103	barnebi01
barnebo01	1902	1	6	USA	IL	Washburn	1993	12	8	USA	IL	Peoria	Bob	Barnes	Robert Avery	150	71	L	L	1924-07-08	1924-07-10	barnb104	barnebo01
barnebr01	1967	3	25	USA	NC	Roanoke Rapids							Brian	Barnes	Brian Keith	170	69	L	L	1990-09-14	1994-07-01	barnb001	barnebr01
barnebr02	1986	5	15	USA	CA	Orange							Brandon	Barnes	Brandon Michael	210	74	R	R	2012-08-07	2016-07-24	barnb002	barnebr02
barneda01	1985	11	8	USA	OR	Portland							Darwin	Barney	Darwin James Kunane	180	70	R	R	2010-08-12	2017-06-16	barnd001	barneda01
barneda02	1989	10	21	USA	NY	Manhasset							Danny	Barnes	Daniel J.	195	73	L	R	2016-08-02	2017-06-16	barnd002	barneda02
barneed01	1890	1	23	USA	WI	Amery	1967	10	4	USA	WI	Rice Lake	Ed	Barney	Edmund J.	178	70	L	R	1915-07-22	1916-07-02	barne104	barneed01
barneep01	1900	12	1	USA	NY	Ossining	1980	11	17	USA	NY	Mineola	Eppie	Barnes	Everett Duane	175	69	L	R	1923-09-24	1924-09-24	barne101	barneep01
barnefr01	1900	1	9	USA	TX	Dallas	1967	9	27	USA	TX	Houston	Frank	Barnes	Frank Samuel	195	74	L	L	1929-04-18	1930-09-26	barnf101	barnefr01
barnefr02	1926	8	26	USA	MS	Longwood	2014	10	19	USA	MS	Greenville	Frank	Barnes	Frank	170	72	R	R	1957-09-22	1960-05-14	barnf102	barnefr02
barneho01	1900	1	31	USA	NY	Fulton	1981	6	18	USA	NY	Lockport	Honey	Barnes	John Francis	175	70	L	R	1926-04-20	1926-04-20	barnh101	barneho01
barneja01	1990	4	14	USA	FL	St. Petersburg							Jacob	Barnes	Jacob Andrew	220	74	R	R	2016-06-03	2017-06-16	barnj002	barneja01
barneje01	1892	8	26	USA	OK	Perkins	1961	9	9	USA	NM	Santa Rosa	Jesse	Barnes	Jesse Lawrence	170	72	L	R	1915-07-30	1927-08-20	barnj102	barneje01
barnejo01	1976	4	24	USA	CA	San Diego							John	Barnes	John Delbert	205	74	R	R	2000-09-16	2001-08-26	barnj001	barnejo01
barneju01	1911	12	1	USA	NC	Linwood	1963	12	31	USA	NC	Jacksonville	Junie	Barnes	Junie Shoaf	170	71	L	L	1934-09-12	1934-09-21	barnj101	barneju01
barnela01	1974	7	23	USA	CA	Bakersfield							Larry	Barnes	Larry Richard	195	73	L	L	2001-04-11	2003-07-31	barnl001	barnela01
barnelu01	1947	4	28	USA	IA	Forest City							Lute	Barnes	Luther Owens	160	70	R	R	1972-08-06	1973-09-26	barnl102	barnelu01
barnema01	1990	6	17	USA	CT	Danbury							Matt	Barnes	Matthew D.	210	76	R	R	2014-09-09	2017-06-16	barnm001	barnema01
barnere01	1903	12	25	USA	AL	Suggsville	1959	7	3	USA	AL	Mobile	Red	Barnes	Emile Deering	158	70	L	R	1927-09-29	1930-09-20	barnr104	barnere01
barnere02	1924	12	19	USA	NE	Omaha	1997	8	12	USA	MD	Baltimore	Rex	Barney	Rex Edward	185	75	R	R	1943-08-18	1950-09-04	barnr103	barnere02
barneri01	1959	7	21	USA	FL	Palm Beach							Rich	Barnes	Richard Monroe	186	76	R	L	1982-07-18	1983-09-25	barnr101	barneri01
barnero01	1850	5	8	USA	NY	Mount Morris	1915	2	5	USA	IL	Chicago	Ross	Barnes	Charles Roscoe	145	68	R	R	1871-05-05	1881-09-21	barnr102	barnero01
barnesa01	1899	12	18	USA	AL	Suggsville	1981	2	19	USA	AL	Montgomery	Sam	Barnes	Samuel Thomas	150	68	L	R	1921-09-14	1921-10-02	barns101	barnesa01
barnesc01	1987	9	5	USA	MA	Springfield							Scott	Barnes	Scott Michael	200	76	L	L	2012-05-30	2013-05-31	barns002	barnesc01
barnesk01	1957	3	3	USA	OH	Cincinnati							Skeeter	Barnes	William Henry	175	71	R	R	1983-09-06	1994-06-20	barns001	barnesk01
barneto01	1983	11	9	USA	AK	Anchorage							Tony	Barnette	Anthony Lee	190	73	R	R	2016-04-05	2017-06-14	barnt002	barneto01
barnevi01	1897	3	5	USA	KS	Ontario	1958	7	24	USA	KS	Wichita	Virgil	Barnes	Virgil Jennings	165	72	R	R	1919-09-25	1928-09-15	barnv101	barnevi01
barnhcl01	1895	12	29	USA	PA	Buck Valley	1980	1	21	USA	MD	Hagerstown	Clyde	Barnhart	Clyde Lee	155	70	R	R	1920-09-22	1928-08-23	barnc102	barnhcl01
barnhed01	1904	9	16	USA	MO	Providence	1984	9	14	USA	MO	Columbia	Edgar	Barnhart	Edgar Vernon	160	70	L	R	1924-09-23	1924-09-23	barne103	barnhed01
barnhle01	1905	2	23	USA	KS	Hoxie	1971	10	7	USA	AZ	Scottsdale	Les	Barnhart	Leslie Earl	180	72	R	R	1928-09-22	1930-09-27	barnl101	barnhle01
barnhtu01	1991	1	7	USA	IN	Indianapolis							Tucker	Barnhart	Tucker Jackson	192	71	B	R	2014-04-03	2017-06-14	barnt001	barnhtu01
barnhvi01	1922	9	1	USA	MD	Hagerstown	2017	4	13	USA	MD	Hagerstown	Vic	Barnhart	Victor Dee	188	72	R	R	1944-10-01	1946-04-21	barnv102	barnhvi01
barnibi01	1853	1	26	USA	NY	New York	1900	7	15	USA	CT	Hartford	Billy	Barnie	William Harrison	157	67		R	1874-05-07	1886-06-28	barnb101	barnibi01
barnige01	1917	8	26	USA	MA	Fitchburg	1990	10	10	USA	FL	Largo	George	Barnicle	George Bernard	175	74	R	R	1939-09-06	1941-04-19	barng101	barnige01
barnoed01	1943	8	23	USA	PA	Scranton							Ed	Barnowski	Edward Anthony	195	74	R	R	1965-09-08	1966-09-16	barne102	barnoed01
barnwch01	1979	3	1	USA	FL	Jacksonville							Chris	Barnwell	Christopher Edward	180	70	R	R	2006-06-20	2006-07-25	barnc001	barnwch01
barojsa01	1957	6	16	Mexico	Veracruz	Cordoba							Salome	Barojas	Salome	160	69	R	R	1982-04-11	1988-09-26	baros001	barojsa01
baronda01	1983	4	24	USA	CA	San Jose							Daniel	Barone	Daniel Edward	185	74	R	R	2007-08-10	2007-09-26	barod001	baronda01
barondi01	1932	10	13	USA	CA	San Jose	2015	4	23	USA	CA	Hollister	Dick	Barone	Richard Anthony	165	69	R	R	1960-09-22	1960-09-30	barod101	barondi01
baronst01	1990	12	7	USA	FL	Miami							Steve	Baron	Steven Phillip	205	72	R	R	2015-09-09	2015-09-25	baros002	baronst01
barracu01	1932	6	20	USA	CA	Sacramento							Cuno	Barragan	Facundo Anthony	180	71	R	R	1961-09-01	1963-04-21	barrc101	barracu01
barrage01	1956	10	19	Mexico	Veracruz	Veracruz							German	Barranca	German	160	72	L	R	1979-09-02	1982-07-11	barrg101	barrage01
barraky01	1990	5	23	USA	CA	Santa Clara							Kyle	Barraclough	Kyle David	225	75	R	R	2015-08-07	2017-06-16	barrk002	barraky01
barrbo01	1856	12		USA	DC	Washington	1930	3	11	USA	DC	Washington	Bob	Barr	Robert McClelland	192	73	R	R	1883-06-23	1891-09-12	barrb101	barrbo01
barrbo02	1908	3	12	USA	MA	Newton	2002	7	25	USA	NH	Dover	Bob	Barr	Robert Alexander	175	72	R	R	1935-09-11	1935-09-14	barrb103	barrbo02
barre01				USA	NY	Brooklyn							John	Barrett	John					1872-09-18	1872-10-31	barru101	barre01
barreaa01	1988	1	2	USA	IN	Evansville							Aaron	Barrett	Aaron James	230	75	R	R	2014-03-31	2015-08-05	barra001	barreaa01
barrebi01				USA	MD	Baltimore							Bill	Barrett	William					1871-07-08	1873-10-18	barrb102	barrebi01
barrebi02	1900	5	28	USA	MA	Cambridge	1951	1	26	USA	MA	Cambridge	Bill	Barrett	William Joseph	175	72	R	R	1921-05-13	1930-05-31	barrb105	barrebi02
barrebo01	1899	1	27	USA	GA	Atlanta	1982	1	18	USA	GA	Atlanta	Bob	Barrett	Robert Schley	175	71	R	R	1923-04-30	1929-08-01	barrb104	barrebo01
barredi01	1906	9	28	USA	PA	Montoursville	1966	10	30	USA	WA	Seattle	Dick	Barrett	Tracy Souter	175	69	R	R	1933-06-27	1945-09-30	barrd101	barredi01
barrefr01	1913	7	1	USA	FL	Fort Lauderdale	1998	3	6	USA	FL	Leesburg	Frank	Barrett	Francis Joseph	173	74	R	R	1939-10-01	1950-09-15	barrf104	barrefr01
barreja01	1991	7	22	USA	CA	Upland							Jake	Barrett	Jake Dalton	240	74	R	R	2016-04-04	2016-09-21	barrj002	barreja01
barreji01	1875	3	28	USA	MA	Athol	1921	10	25	USA	MI	Detroit	Jimmy	Barrett	James Erigena	170	67	L	R	1899-09-13	1908-05-13	barrj103	barreji01
barrejo01	1915	12	18	USA	MA	Lowell	1974	8	17	USA	NH	Seabrook Beach	Johnny	Barrett	John Joseph	170	70	L	L	1942-04-14	1946-09-26	barrj106	barrejo01
barrema01	1860	11		USA	NY	Port Henry	1910	1	29	USA	MA	Holyoke	Marty	Barrett	Martin F.	170	69	R	R	1884-06-24	1884-10-15	barrm101	barrema01
barrema02	1958	6	23	USA	CA	Arcadia							Marty	Barrett	Martin Glenn	175	70	R	R	1982-09-06	1991-05-07	barrm001	barrema02
barremi01	1976	10	22	USA	GA	Atlanta							Michael	Barrett	Michael Patrick	185	75	R	R	1998-09-19	2009-04-17	barrm003	barremi01
barrere01	1915	2	14	USA	CA	Santa Barbara	1990	7	28	USA	NC	Wilson	Red	Barrett	Charles Henry	183	71	R	R	1937-09-15	1949-09-29	barrr101	barrere01
barreti01	1961	1	24	USA	IN	Huntingburg							Tim	Barrett	Timothy Wayne	185	73	L	R	1988-07-18	1988-08-09	barrt001	barreti01
barreto01	1960	4	2	USA	CA	San Fernando							Tom	Barrett	Thomas Loren	157	69	B	R	1988-07-02	1992-08-16	barrt002	barreto01
barrifr01	1953	6	10	Mexico	Sonora	Hermosillo	1982	4	9	Mexico	Sonora	Hermosillo	Francisco	Barrios	Francisco Javier	155	71	R	R	1974-08-18	1981-06-03	barrf101	barrifr01
barrijo01	1957	6	26	USA	NY	New York							Jose	Barrios	Jose Manuel	195	76	R	R	1982-04-23	1982-05-07	barrj102	barrijo01
barrima01	1974	9	21	Panama	Chiriqui	Cabecera							Manuel	Barrios	Manuel Antonio	170	72	R	R	1997-09-16	1998-07-03	barrm002	barrima01
barriyh01	1991	12	1	Colombia	Bolivar	Cartagena							Yhonathan	Barrios	Yhonathan	205	70	B	R	2015-09-24	2015-10-04	barry001	barriyh01
barrji01	1948	2	10	USA	CA	Lynwood							Jim	Barr	James Leland	205	75	R	R	1971-07-31	1983-10-02	barrj101	barrji01
barrocu01	1883	10	20	USA	ME	Gray	1955	2	10	USA	ME	Gorham	Cuke	Barrows	Roland	158	68	R	L	1909-09-18	1912-09-10	barrc102	barrocu01
barroed99	1868	5	10	USA	IL	Springfield	1953	12	15	USA	NY	Port Chester	Ed	Barrow	Edward Grant							barre801	barroed99
barrofr01	1844	10	22	USA	OH	Hudson	1922	2	6	USA	MA	Fitchburg	Frank	Barrows	Franklin Lee					1871-05-20	1871-10-07	barrf102	barrofr01
barrofr02	1890	8	6	USA	WV	St. Marys	1964	9	18	USA	WV	St. Marys	Frank	Barron	Frank John	175	73	L	L	1914-08-19	1914-08-19	barrf103	barrofr02
barrore01	1900	6	21	USA	GA	Clarkesville	1982	10	4	USA	GA	Atlanta	Red	Barron	David Irenus	185	71	R	R	1929-06-10	1929-07-07	barrr103	barrore01
barroto01	1966	8	17	USA	OR	Portland							Tony	Barron	Anthony Dirk	185	72	R	R	1996-06-02	1997-09-28	barrt003	barroto01
barrsc01	1886	10	6	USA	TN	Bristol	1934	12	2	USA	TX	Fort Worth	Scotty	Barr	Hyder Edward	175	72	R	R	1908-08-22	1909-07-17	barrs102	barrsc01
barrst01	1951	9	8	USA	MO	St. Louis							Steve	Barr	Steven Charles	200	76	L	L	1974-10-01	1976-09-29	barrs103	barrst01
barryed01	1882	10	2	USA	WI	Madison	1920	6	19	USA	MA	Montague	Ed	Barry	Edward	185	75	R	L	1905-08-27	1907-10-04	barre101	barryed01
barryha01	1891	3	26	USA	CA	Susanville	1969	11	5	USA	NV	Carson City	Hardin	Barry	Hardin	185	72	R	R	1912-06-21	1912-07-13	barrh101	barryha01
barryja01	1887	4	26	USA	CT	Meriden	1961	4	23	USA	MA	Shrewsbury	Jack	Barry	John Joseph	158	69	R	R	1908-07-13	1919-06-23	barrj104	barryja01
barryje01	1969	9	22	USA	OR	Medford							Jeff	Barry	Jeffrey Finas	190	73	B	R	1995-06-09	1999-10-03	barrj001	barryje01
barryke01	1978	8	18	USA	NJ	Princeton Junction							Kevin	Barry	Kevin Thomas	235	74	R	R	2006-06-26	2007-05-13	barrk001	barryke01
barryri01	1940	9	12	USA	CA	Berkeley							Rich	Barry	Richard Donovan	205	76	R	R	1969-07-04	1969-08-19	barrr102	barryri01
barrysh01	1878	10	27	USA	NY	Newburgh	1936	11	27	USA	CA	Los Angeles	Shad	Barry	John C.			R	R	1899-05-30	1908-10-07	barrs101	barrysh01
barryto01	1879	4	10	USA	MO	St. Louis	1946	6	4	USA	MO	St. Louis	Tom	Barry	Thomas Arthur	155	69		R	1904-04-15	1904-04-15	barrt101	barryto01
bartedi01	1907	11	22	USA	IL	Chicago	1995	8	4	USA	CA	Alameda	Dick	Bartell	Richard William	160	69	R	R	1927-10-02	1946-05-24	bartd101	bartedi01
barteki01	1972	7	21	USA	NE	Omaha							Kimera	Bartee	Kimera Anotchi	175	72	B	R	1996-04-03	2001-08-03	bartk001	barteki01
barthbo01	1924	7	15	USA	CT	New Haven	2000	4	14	USA	CT	Branford	Bob	Barthelson	Robert Edward	185	72	R	R	1944-07-04	1944-09-27	bartb103	barthbo01
barthji01	1984	1	6	USA	GA	Atlanta							Jimmy	Barthmaier	James Richard	205	77	R	R	2008-06-27	2008-09-27	bartj002	barthji01
barthjo01	1882	4	14	USA	PA	Philadelphia	1946	11	4	USA	PA	Fairview Village	John	Barthold	John Francis	180	71	B	R	1904-05-17	1904-06-08	bartj101	barthjo01
barthle01	1903	4	4	USA	WI	Madison	1972	9	19	USA	IL	Barrington	Les	Bartholomew	Lester Justin	195	71	R	L	1928-04-11	1932-08-28	bartl101	barthle01
bartito01	1932	5	9	USA	PA	Pittsburgh							Tony	Bartirome	Anthony Joseph	155	70	L	L	1952-04-19	1952-09-28	bartt101	bartito01
bartlbi01	1885	1	8	USA	OH	Cincinnati	1965	5	17	USA	OH	Cincinnati	Bill	Bartley	William Jackson	190	71	R	R	1903-09-15	1907-09-20	bartb102	bartlbi01
bartlbo01	1920	2	11	USA	IL	Chicago	2012	12	21	USA	TX	North Richland Hills	Boyd	Bartley	Boyd Owen	165	68	R	R	1943-05-30	1943-06-07	bartb104	bartlbo01
bartlir01	1914	6	27	USA	MI	Bay City	1973	6	12	USA	MI	Westland	Irv	Bartling	Henry Irving	175	72	R	R	1938-09-08	1938-09-29	barti101	bartlir01
bartlja01	1979	10	30	USA	CA	Mountain View							Jason	Bartlett	Jason Alan	190	72	R	R	2004-08-03	2014-04-06	bartj001	bartlja01
bartobo01	1941	7	30	USA	OH	Norwood							Bob	Barton	Robert Wilbur	175	72	R	R	1965-09-17	1974-07-30	bartb101	bartobo01
bartobr01	1982	4	25	USA	CA	Los Angeles							Brian	Barton	Brian Deon	190	75	R	R	2008-04-01	2009-06-03	bartb001	bartobr01
bartocl01	1979	9	5	USA	TX	West							Cliff	Bartosh	Clifford Paul	175	74	L	L	2004-05-15	2005-06-18	bartc001	bartocl01
bartoda01	1917	3	24	USA	MO	St. Louis	2006	4	30	USA	TN	Nashville	Dave	Bartosch	David Robert	190	73	R	R	1945-04-28	1945-07-22	bartd102	bartoda01
bartoda02	1985	8	16	USA	VT	Springfield							Daric	Barton	Daric William	215	72	L	R	2007-09-10	2014-05-13	bartd001	bartoda02
bartoha01	1875	1	20	USA	PA	Chester	1955	1	25	USA	PA	Upland	Harry	Barton	Harry Lamb	155	66	B	R	1905-04-15	1905-09-26	barth101	bartoha01
bartosh01	1963	5	14	USA	CA	Los Angeles							Shawn	Barton	Shawn Edward	195	75	R	L	1992-08-06	1996-09-06	barts001	bartosh01
bartovi01	1908	2	1	CAN	AB	Edmonton	1973	9	13	CAN	ON	Toronto	Vince	Barton	Vincent David	180	72	L	R	1931-07-17	1932-07-24	bartv101	bartovi01
bartsch01	1865	3	13	USA	IL	Peoria	1936	6	9	USA	IL	Peoria	Charlie	Bartson	Charles Franklin	170	72			1890-05-14	1890-09-16	bartc101	bartsch01
barziph01	1979	1	25	USA	TX	Houston							Philip	Barzilla	Philip Joseph	180	72	L	L	2006-06-11	2006-06-11	barzp001	barziph01
basakch01	1978	12	6	USA	NE	North Platte							Chris	Basak	Christopher Joseph	190	74	R	R	2007-06-09	2007-07-31	basac001	basakch01
basgamo01	1922	2	8	USA	KS	Pfeifer	2005	9	22	USA	AZ	Sierra Vista	Monty	Basgall	Romanus	175	70	R	R	1948-04-19	1951-08-11	basgm101	basgamo01
bashaal01	1888	8	22	USA	OH	Cincinnati	1967	6	23	USA	OH	Cincinnati	Al	Bashang	Albert C.	150	68	B	R	1912-07-30	1918-07-13	basha101	bashaal01
bashowa01	1909	10	6	USA	PA	Harrisburg	1984	9	26	USA	FL	Sebring	Walt	Bashore	Walter Franklin	170	72	R	R	1936-07-14	1936-08-07	bashw101	bashowa01
basined01	1922	11	4	USA	NY	Buffalo							Eddie	Basinski	Edwin Frank	172	73	R	R	1944-05-20	1947-07-04	basie101	basined01
baskeji01	1887	12	10	USA	TN	Athens	1942	7	30	USA	TN	Athens	Jim	Baskette	James Blaine	185	74	R	R	1911-09-22	1913-05-09	baskj101	baskeji01
bassan01	1987	11	1	USA	MI	Dearborn							Anthony	Bass	Anthony Edward	200	74	R	R	2011-06-13	2017-05-03	bassa001	bassan01
bassbr01	1982	1	6	USA	NC	Pinehurst							Brian	Bass	Brian Michael	215	74	R	R	2008-04-01	2010-09-08	bassb001	bassbr01
bassdi01	1906	7	7	USA	TN	Rogersville	1989	2	8	USA	FL	Graceville	Dick	Bass	Richard William	175	74	R	R	1939-09-21	1939-09-21	bassd102	bassdi01
bassdo01	1898	12	4	USA	GA	Macon	1970	1	12	USA	GA	Macon	Doc	Bass	William Capers	165	70			1918-07-29	1918-07-29	bassd101	bassdo01
bassech01	1863	2	9	USA	RI	Central Falls	1942	5	28	USA	RI	Pawtucket	Charley	Bassett	Charles Edwin	150	70	R	R	1884-07-22	1892-10-15	bassc101	bassech01
bassich01	1989	2	22	USA	OH	Toledo							Chris	Bassitt	Christopher M.	220	77	R	R	2014-08-30	2016-04-28	bassc001	bassich01
bassjo01	1848			USA	MD	Charleston	1888	9	25	USA	CO	Denver	John	Bass	John Elias	150	66			1871-05-04	1877-08-20	bassj101	bassjo01
basske01	1959	5	12	USA	CA	Redwood City							Kevin	Bass	Kevin Charles	183	72	B	R	1982-04-09	1995-10-01	bassk001	basske01
bassljo01	1895	6	3	USA	PA	Lancaster	1979	6	29	USA	CA	Santa Monica	Johnny	Bassler	John Landis	170	69	L	R	1913-07-11	1927-09-30	bassj102	bassljo01
bassno01	1939	1	21	USA	MS	Laurel							Norm	Bass	Norman Delaney	205	75	R	R	1961-04-23	1963-04-26	bassn101	bassno01
bassra01	1954	3	13	USA	OK	Lawton							Randy	Bass	Randy William	210	73	L	R	1977-09-03	1982-06-07	bassr101	bassra01
bastaan01	1985	9	21	D.R.	Hato Mayor	Hato Mayor del Rey							Antonio	Bastardo	Antonio Francisco	202	71	R	L	2009-06-02	2017-04-24	basta001	bastaan01
bastich01	1858	3	2	USA	PA	Philadelphia	1943	11	10	USA	PA	Philadelphia	Charlie	Bastian	Charles A.	145	66	R	R	1884-08-18	1891-08-22	bastc101	bastich01
batchem01	1880	1	21	USA	NY	Brooklyn	1926	8	23	USA	NY	Brooklyn	Emil	Batch	Emil	170	67	R	R	1904-09-13	1907-10-05	batce101	batchem01
batchjo01	1898	7	11	USA	MA	Wenham	1989	5	5	USA	MA	Beverly	Joe	Batchelder	Joseph Edward	165	67	R	L	1923-09-29	1925-05-20	batcj101	batchjo01
batchri01	1967	4	8	USA	SC	Florence							Rich	Batchelor	Richard Anthony	195	73	R	R	1993-09-03	1997-07-15	batcr001	batchri01
batemjo01	1940	7	21	USA	OK	Fort Sill	1996	12	3	USA	OK	Sand Springs	John	Bateman	John Alvin	210	75	R	R	1963-04-19	1972-10-03	batej102	batemjo01
batesaa01	1984	3	10	USA	NY	New York							Aaron	Bates	Aaron	230	76	R	R	2009-07-06	2009-07-12	batea001	batesaa01
batesbi01	1963	12	7	USA	TX	Houston							Billy	Bates	William Derrick	155	67	L	R	1989-08-17	1990-10-02	bateb001	batesbi01
batesbu01	1912	3	16	USA	CA	Los Angeles	1987	4	29	USA	CA	Long Beach	Bud	Bates	Hubert Edgar	165	72	R	R	1939-09-16	1939-10-01	bateb101	batesbu01
batesch01	1907	9	17	USA	PA	Philadelphia	1980	1	29	USA	KS	Topeka	Charlie	Bates	Charles William	165	70	R	R	1927-09-22	1927-10-02	batec101	batesch01
batesde01	1940	6	12	USA	WA	Seattle	2009	9	24	USA	WA	Spokane	Del	Bates	Delbert Oakley	195	74	L	R	1970-05-06	1970-06-05	bated101	batesde01
batesdi01	1945	10	7	USA	OH	McArthur							Dick	Bates	Charles Richard	190	72	L	R	1969-04-27	1969-04-27	bated102	batesdi01
batesfr01	1876	9	28	USA	TN	Cleveland							Frank	Bates	Creed Napoleon	156	70		R	1898-10-07	1899-09-09	batef101	batesfr01
batesja01	1971	1	5	USA	CA	Downey							Jason	Bates	Jason Charles	170	71	B	R	1995-04-26	1998-09-27	batej001	batesja01
batesjo01	1868	5	28	USA	OH		1919	3	24	USA	CA	Oakland	John	Bates	John William					1889-08-25	1889-08-25	batej103	batesjo01
batesjo02	1882	8	21	USA	OH	Steubenville	1949	2	10	USA	OH	Steubenville	Johnny	Bates	John William	168	67	L	L	1906-04-12	1914-10-10	batej101	batesjo02
batesra01	1890	2	8	USA	NJ	Paterson	1970	8	15	USA	AZ	Tucson	Ray	Bates	Raymond	165	72	R	R	1913-05-31	1917-10-03	bater101	batesra01
bathebi01	1960	10	14	USA	CA	Downey							Bill	Bathe	William David	200	74	R	R	1986-04-12	1990-10-03	bathb001	bathebi01
batiske01	1966	10	21	USA	TX	Galveston							Kevin	Batiste	Kevin Wade	178	74	R	R	1989-06-13	1989-06-21	batik001	batiske01
batiski01	1968	3	15	USA	LA	New Orleans							Kim	Batiste	Kimothy Emil	175	72	R	R	1991-09-08	1996-09-28	batik002	batiski01
batismi01	1971	2	19	D.R.	Distrito Nacional	Santo Domingo							Miguel	Batista	Miguel Jerez	210	73	R	R	1992-04-11	2012-09-11	batim001	batismi01
batisra01	1945	11	25	D.R.	San Pedro de Macoris	San Pedro de Macoris	2008	10	25	D.R.	Distrito Nacional	Santo Domingo	Rafael	Batista	Rafael	195	73	L	L	1973-06-17	1975-04-27	batir101	batisra01
batisto01	1973	12	9	D.R.	Puerto Plata	Puerto Plata							Tony	Batista	Leocadio Francisco	180	72	R	R	1996-06-03	2007-09-30	batit001	batisto01
batscbi01	1892	5	18	USA	OH	Mingo Junction	1963	12	31	USA	OH	Canton	Bill	Batsch	William McKinley	168	70	R	R	1916-09-09	1916-09-09	batsb101	batscbi01
battala01	1876	5	1	USA	NY	Brooklyn	1938	1	27	USA	NY	Brooklyn	Larry	Battam	Lawrence	166	71			1895-09-28	1895-09-30	battl101	battala01
batteea01	1935	1	5	USA	CA	Los Angeles	2003	11	15	USA	FL	Ocala	Earl	Battey	Earl Jesse	205	73	R	R	1955-09-10	1967-09-27	batte101	batteea01
battege01	1891	10	7	USA	NJ	Haddonfield	1972	8	4	USA	FL	New Port Richey	George	Batten	George Burnett	165	71	R	R	1912-09-28	1912-09-28	battg101	battege01
battijo01	1853	11	11	USA	PA	West Bradford	1937	12	10	USA	OH	Akron	Joe	Battin	Joseph V.	169	70	R	R	1871-08-11	1890-05-28	battj102	battijo01
battlal01	1968	11	29	USA	NC	Grantham							Allen	Battle	Allen Zelmo	170	72	R	R	1995-04-26	1996-08-14	batta001	battlal01
battlho01	1972	3	25	USA	MS	Biloxi							Howard	Battle	Howard Dion	210	72	R	R	1995-09-05	1999-10-03	batth001	battlho01
battlji01	1901	3	26	USA	TX	Bailey	1965	9	30	USA	CA	Chico	Jim	Battle	James Milton	170	73	R	R	1927-09-09	1927-10-02	battj101	battlji01
battoch01	1954	8	24	USA	CA	Los Angeles							Chris	Batton	Christopher Sean	195	76	R	R	1976-09-19	1976-10-02	battc101	battoch01
battsma01	1921	10	16	USA	TX	San Antonio	2013	7	14	USA	LA	Baton Rouge	Matt	Batts	Matthew Daniel	200	71	R	R	1947-09-10	1956-05-08	battm101	battsma01
baueral01	1859	8	7	USA	OH	Columbus	1944	2	23	USA	OH	Columbus	Al	Bauer	Albert	190	69		L	1884-09-22	1886-06-11	bauea101	baueral01
bauerha01	1922	7	31	USA	IL	East St. Louis	2007	2	9	USA	KS	Lenexa	Hank	Bauer	Henry Albert	192	72	R	R	1948-09-06	1961-07-21	baueh101	bauerha01
bauerlo01	1898	11	30	USA	NJ	Egg Harbor City	1979	2	4	USA	NJ	Pomona	Lou	Bauer	Louis Walter	175	72	R	R	1918-08-13	1918-08-13	bauel101	bauerlo01
bauerri01	1977	1	10	USA	CA	Garden Grove							Rick	Bauer	Richard Edward	215	78	R	R	2001-09-02	2008-06-29	bauer001	bauerri01
bauerru01	1914	5	10	USA	WI	Townsend	1995	1	21	USA	IL	Hines	Russ	Bauers	Russell Lee	195	75	L	R	1936-08-20	1950-05-06	bauer101	bauerru01
bauertr01	1991	1	17	USA	CA	North Hollywood							Trevor	Bauer	Trevor Andrew	190	73	R	R	2012-06-28	2017-06-13	bauet001	bauertr01
baughju01	1974	8	1	USA	CA	Mountain View							Justin	Baughman	Justin Reis	175	71	R	R	1998-05-17	2000-09-30	baugj001	baughju01
baumabu01	1987	12	9	USA	IL	Chicago							Buddy	Baumann	George Charles	198	71	L	L	2016-07-16	2016-09-28	baumb001	baumabu01
baumafr01	1933	7	1	USA	MO	St. Louis							Frank	Baumann	Frank Matt	205	72	L	L	1955-07-31	1965-05-08	baumf102	baumafr01
baumapa01	1885	12	20	USA	IN	Indianapolis	1969	11	20	USA	IN	Indianapolis	Paddy	Baumann	Charles John	160	69	R	R	1911-08-10	1917-09-08	baump101	baumapa01
baumeji01	1931	1	29	USA	OK	Tulsa	1996	7	8	USA	PA	Paoli	Jim	Baumer	James Sloan	185	74	R	R	1949-09-14	1961-04-27	baumj102	baumeji01
baumgge01	1891	7	22	USA	WV	Barboursville	1970	12	13	USA	WV	Barboursville	George	Baumgardner	George Washington	178	71	L	R	1912-04-14	1916-07-15	baumg101	baumgge01
baumgha01	1892	10	6	USA	TN	South Pittsburg	1930	12	3	USA	GA	Augusta	Harry	Baumgartner	Harry Edward	175	71	L	R	1920-09-06	1920-10-02	baumh101	baumgha01
baumgjo01	1931	5	29	USA	AL	Birmingham							John	Baumgartner	John Edward	190	73	R	R	1953-04-14	1953-04-21	baumj101	baumgjo01
baumgro01	1955	5	27	USA	IL	Highland Park							Ross	Baumgarten	Ross	180	73	L	L	1978-08-16	1982-08-23	baumr101	baumgro01
baumgst01	1894	12	14	USA	TX	Houston	1955	10	4	USA	PA	Philadelphia	Stan	Baumgartner	Stanwood Fulton	175	72	L	L	1914-06-26	1926-05-30	baums101	baumgst01
baumhfr01	1918	10	7	USA	OH	Midvale	1997	12	14	USA	FL	Winter Springs	Frank	Baumholtz	Frank Conrad	175	70	L	L	1947-04-15	1957-05-26	baumf101	baumhfr01
bausege01	1869	3	22	USA	PA	Philadelphia	1947	7	29	USA	PA	Norristown	George	Bausewine	George W.	207	74			1889-09-14	1889-10-11	bausg101	bausege01
bautaed01	1935	1	6	Cuba		Florida							Ed	Bauta	Eduardo	200	75	R	R	1960-07-06	1964-05-09	baute101	bautaed01
bautida01	1972	5	24	D.R.	Distrito Nacional	Santo Domingo							Danny	Bautista	Daniel	170	71	R	R	1993-09-15	2004-09-28	bautd001	bautida01
bautide01	1982	10	23	D.R.	Samana	Sanchez							Denny	Bautista	Denny M.	190	77	R	R	2004-05-25	2010-08-04	bautd002	bautide01
bautijo01	1964	7	25	D.R.	Peravia	Bani							Jose	Bautista	Jose Joaquin	177	73	R	R	1988-04-09	1997-09-25	bautj001	bautijo01
bautijo02	1980	10	19	D.R.	Distrito Nacional	Santo Domingo							Jose	Bautista	Jose Antonio	205	72	R	R	2004-04-04	2017-06-16	bautj002	bautijo02
bautira01	1993	3	8	D.R.	Distrito Nacional	Santo Domingo							Rafael	Bautista	Rafael Darwing	165	74	R	R	2017-04-30	2017-05-07		bautira01
baxesji01	1928	7	5	USA	CA	San Francisco	1996	11	14	USA	CA	Garden Grove	Jim	Baxes	Dimitrios Speros	190	73	R	R	1959-04-11	1959-09-26	baxej101	baxesji01
baxesmi01	1930	12	18	USA	CA	San Francisco							Mike	Baxes	Michael	175	70	R	R	1956-04-17	1958-09-27	baxem101	baxesmi01
baxtemi01	1984	12	7	USA	NY	Queens							Mike	Baxter	Michael Joseph	205	72	L	R	2010-09-06	2015-07-08	baxtm001	baxtemi01
baxtemo01	1876	7	27	USA	WI	Chippewa Falls	1926	8	7	USA	OR	Portland	Moose	Baxter	John Morris	200	74	L	R	1907-04-19	1907-04-24	baxtj101	baxtemo01
bayha01	1878	1	17	USA	IL	Pontiac	1952	3	20	USA	IL	Peoria	Harry	Bay	Harry Elbert	138	68	L	L	1901-07-23	1908-05-03	bay-h101	bayha01
bayja01	1978	9	20	CAN	BC	Trail							Jason	Bay	Jason Raymond	210	74	R	R	2003-05-23	2013-07-26	bay-j001	bayja01
bayledi01	1883	9	6	USA	MO	Joplin	1920	12	16	USA	NM	Santa Rita	Dick	Bayless	Harry Owen	178	69	L	R	1908-09-09	1908-10-04	bayld101	bayledi01
baylijo01	1980	8	13	USA	MA	North Adams							Jonah	Bayliss	Jonah James	200	73	R	R	2005-06-21	2007-08-03	baylj001	baylijo01
baylodo01	1949	6	28	USA	TX	Austin							Don	Baylor	Don Edward	190	73	R	R	1970-09-18	1988-10-01	bayld001	baylodo01
baynebi01	1899	4	18	USA	PA	Pittsburgh	1981	5	22	USA	MO	St. Louis	Bill	Bayne	William Lear	160	69	L	L	1919-09-20	1930-04-26	baynb101	baynebi01
bazaryo01	1984	7	11	Venezuela	Aragua	Maracay							Yorman	Bazardo	Yorman Michael	230	74	R	R	2005-05-26	2009-10-03	bazay001	bazaryo01
beachbr01	1986	9	3	USA	IN	Kokomo							Brandon	Beachy	Brandon Alan	220	74	R	R	2010-09-20	2015-07-20	beacb001	beachbr01
beachja01	1862			USA	VA	Alexandria	1896	7	23	USA	VA	Alexandria	Jack	Beach	Stonewall Jackson					1884-05-01	1884-06-12	beacj101	beachja01
beallbo01	1948	4	24	USA	OR	Portland							Bob	Beall	Robert Brooks	180	71	B	L	1975-05-12	1980-09-23	bealb101	beallbo01
bealljo01	1882	3	12	USA	MD	Beltsville	1926	6	13	USA	MD	Beltsville	Johnny	Beall	John Woolf	180	72	L	R	1913-04-17	1918-07-16	bealj101	bealljo01
beallwa01	1899	7	29	USA	DC	Washington	1959	1	28	USA	MD	Suitland	Walter	Beall	Walter Esau	178	70	R	R	1924-09-03	1929-06-12	bealw101	beallwa01
bealsto01	1850	8		USA	NY	New York	1915	10	2	USA	CA	San Francisco	Tommy	Beals	Thomas Lamb	144	65	R		1871-07-27	1880-09-29	bealt101	bealsto01
beamal01	1869	11	21	USA	PA	Johnstown	1938	4	17	USA	AZ	Nogales	Alex	Beam	Alexander Rodger		69			1889-05-25	1889-05-29	beama101	beamal01
beamer01	1867	3	17	USA	OH	Mansfield	1918	9	13	USA	OH	Mansfield	Ernie	Beam	Ernest Joseph	185	72		R	1895-05-02	1895-08-03	beame101	beamer01
beamoch01	1934	12	25	USA	CA	Oakland	2016	5	3	USA	CA	San Leandro	Charlie	Beamon	Charles Alonzo	195	71	R	R	1956-09-26	1958-09-13	beamc102	beamoch01
beamoch02	1953	12	4	USA	CA	Oakland							Charlie	Beamon	Charles Alonzo	183	73	L	L	1978-09-11	1981-09-22	beamc101	beamoch02
beamotr01	1974	2	11	USA	TX	Dallas							Trey	Beamon	Clifford	195	75	L	R	1996-08-04	1998-09-27	beamt001	beamotr01
beamtj01	1980	8	28	USA	AZ	Scottsdale							T. J.	Beam	Theodore Lester	215	79	R	R	2006-06-17	2008-09-28	beamt002	beamtj01
beanbe01	1905	4	25	USA	TX	Mullin	1988	6	1	USA	TX	Comanche	Belve	Bean	Beveric Benton	197	73	R	R	1930-05-30	1935-06-27	beanb101	beanbe01
beanbi01	1964	5	11	USA	CA	Santa Ana							Bill	Bean	William Daro	185	72	L	L	1987-04-25	1995-07-08	beanb002	beanbi01
beanco01	1977	1	16	USA	AL	Anniston							Colter	Bean	Randall Colter	255	78	R	R	2005-04-26	2007-05-04	beanc001	beanco01
beanebi01	1962	3	29	USA	FL	Orlando							Billy	Beane	William Lamar	195	76	R	R	1984-09-13	1989-10-01	beanb001	beanebi01
beanjo01	1874	3	18	USA	MA	Boston	1961	2	15	USA	GA	Atlanta	Joe	Bean	Joseph William	138	68	R	R	1902-04-28	1902-06-30	beanj101	beanjo01
beardda01	1959	10	2	USA	GA	Atlanta							Dave	Beard	Charles David	190	77	L	R	1980-07-16	1989-07-21	beard001	beardda01
beardge01	1920	9	5	USA	AR	Lexa	2004	3	18	USA	AL	Alexander City	Gene	Bearden	Henry Eugene	198	75	L	L	1947-05-10	1953-09-05	bearg102	beardge01
beardmi01	1950	6	21	USA	AR	Little Rock							Mike	Beard	Michael Richard	185	73	L	L	1974-09-07	1977-05-02	bearm101	beardmi01
beardol01	1862	5	2	USA	KY	Lexington	1929	5	28	USA	OH	Cincinnati	Ollie	Beard	Oliver Perry	180	71	R	R	1889-04-17	1891-06-28	bearo101	beardol01
beardra01	1929	2	11	USA	OH	Cincinnati	2003	2	10	USA	FL	West Palm Beach	Ralph	Beard	Ralph William	200	77	R	R	1954-06-29	1954-09-09	bearr101	beardra01
beardte01	1921	1	7	USA	MD	Woodsboro	2011	12	30	USA	IN	Fishers	Ted	Beard	Cramer Theodore	165	68	L	L	1948-09-05	1958-05-13	beart101	beardte01
bearega01	1952	8	22	USA	CA	San Diego							Gary	Beare	Gary Ray	205	76	R	R	1976-09-07	1977-10-01	bearg101	bearega01
bearnla01	1941	9	11	USA	NY	New York	1999	12	31	USA	FL	Seminole	Larry	Bearnarth	Lawrence Donald	203	74	R	R	1963-04-16	1971-05-30	bearl101	bearnla01
bearske01	1965	11	7	USA	NJ	Jersey City							Kevin	Bearse	Kevin Gerard	195	74	L	L	1990-04-15	1990-04-30	beark001	bearske01
beaslch01	1962	6	23	USA	TN	Jackson							Chris	Beasley	Christopher Charles	190	74	R	R	1991-07-20	1991-09-29	beasc001	beaslch01
beaslle01	1948	8	27	USA	VA	Sparta							Lew	Beasley	Lewis Paige	172	70	L	R	1977-05-21	1977-10-02	beasl101	beaslle01
beatied01	1866	8	10	USA	MD	Baltimore	1925	5	9	USA	MD	Baltimore	Ed	Beatin	Ebenezer Ambrose	162	69	R	L	1887-08-02	1891-09-14	beate101	beatied01
beatlda01	1864	1		USA	NY	New York	1925	9	22	USA	NY	New York	Dave	Beadle	David A.	200	74	L		1884-06-17	1884-06-17	beatd102	beatlda01
beatope01	1986	10	27	D.R.	Distrito Nacional	Santo Domingo							Pedro	Beato	Pedro	230	78	R	R	2011-04-01	2014-06-18	beatp001	beatope01
beattbl01	1964	4	25	USA	TX	Victoria							Blaine	Beatty	Gordon Blaine	185	74	L	L	1989-09-16	1991-09-30	beatb001	beattbl01
beattde01	1893	4	7	USA	MD	Baltimore	1969	10	6	USA	ME	Norway	Desmond	Beatty	Desmond Aloysius	158	68	R	R	1914-09-28	1914-10-06	beatd101	beattde01
beattji01	1954	7	4	USA	VA	Hampton							Jim	Beattie	James Louis	210	77	R	R	1978-04-25	1986-08-05	beatj001	beattji01
beaucji01	1939	8	21	USA	OK	Vinita	2007	12	25	USA	GA	Union City	Jim	Beauchamp	James Edward	190	74	R	R	1963-09-22	1973-09-20	beauj101	beaucji01
beaumgi01	1876	7	23	USA	WI	Rochester	1956	4	10	USA	WI	Burlington	Ginger	Beaumont	Clarence Howeth	190	68	L	R	1899-04-21	1910-10-15	beaug101	beaumgi01
beavabl01	1989	1	17	USA	TX	Irving							Blake	Beavan	Blake William	245	79	R	R	2011-07-03	2014-04-15	beavb001	beavabl01
beaveed01	1848			USA	NY	Troy							Edward	Beavens	Edward P.	138	68			1871-05-09	1872-08-22	beave101	beavee.01
beazljo01	1918	5	25	USA	TN	Nashville	1990	4	21	USA	TN	Nashville	Johnny	Beazley	John Andrew	190	73	R	R	1941-09-28	1949-05-08	beazj101	beazljo01
becanbu01	1859	8	22	USA	NY	New York	1923	11	5	USA	NY	New York	Buck	Becannon	James Melvin	165	70			1884-10-15	1887-05-28	becab101	becanbu01
bechlst01	1979	11	18	USA	OR	Medford	2003	2	17	USA	FL	Fort Lauderdale	Steve	Bechler	Steven Scott	207	74	R	R	2002-09-06	2002-09-22	bechs001	bechlst01
bechtge01	1848	9	2	USA	PA	Philadelphia	1921	4	3	USA	PA	Philadelphia	George	Bechtel	George W.	165	71			1871-05-20	1876-08-19	bechg101	bechtge01
beckbo01	1904	10	16	USA	IL	Decatur	1987	5	7	USA	IL	Champaign	Boom-Boom	Beck	Walter William	200	74	R	R	1924-09-22	1945-09-26	beckb104	beckbo01
beckch01	1985	1	17	USA	TX	Jasper							Chad	Beck	Chad Lee	250	76	R	R	2011-09-13	2012-10-01	beckc001	beckch01
beckch02	1990	9	4	USA	GA	Commerce							Chris	Beck	Christopher Michael	225	75	R	R	2015-05-28	2017-06-15	beckc002	beckch02
beckcl01	1900	1	6	USA	CA	Bassett	1988	7	15	USA	CA	Temple City	Clyde	Beck	Clyde Eugene	176	70	R	R	1926-05-19	1931-09-11	beckc101	beckcl01
beckebe01	1886	7	5	USA	KS	El Dorado	1943	8	16	USA	CA	Huntington Park	Beals	Becker	David Beals	170	69	L	L	1908-04-19	1915-10-06	beckb101	beckebe01
beckebo01	1875	8	15	USA	NY	Syracuse	1951	10	11	USA	NY	Syracuse	Bob	Becker	Robert Charles	148	67	L	L	1897-09-06	1898-05-17	beckb102	beckebo01
beckech01	1890	10	14	USA	DC	Washington	1928	7	30	USA	DC	Washington	Charlie	Becker	Charles Schlagel	180	74	L	L	1911-08-02	1912-05-18	beckc102	beckech01
beckegl01	1940	10	12	USA	PA	Pittsburgh							Glenn	Beckert	Glenn Alfred	190	73	R	R	1965-04-12	1975-04-27	beckg101	beckegl01
beckehe01	1884	6	15	USA	NY	New York	1949	9	15	USA	NY	Jackson Heights	Heinie	Beckendorf	Henry Ward	174	69	R	R	1909-04-16	1910-09-10	beckh101	beckehe01
beckehe02	1915	8	26	Germany	Berlin	Berlin	1991	11	11	USA	TX	Dallas	Heinz	Becker	Heinz Reinhard	200	74	B	R	1943-04-21	1947-05-09	beckh102	beckehe02
beckejo01	1908	6	25	USA	MO	St. Louis	1998	1	11	USA	MO	Sunset Hills	Joe	Becker	Joseph Edward	180	73	R	R	1936-05-10	1937-09-14	beckj102	beckejo01
beckejo02	1980	5	15	USA	TX	Spring							Josh	Beckett	Joshua Patrick	230	77	R	R	2001-09-04	2014-08-03	beckj002	beckejo02
beckema01	1893	12	22	USA	OH	Tiffin	1957	9	25	USA	OH	Cincinnati	Marty	Becker	Martin Henry	155	68	B	L	1915-09-08	1915-10-06	beckm101	beckema01
becker01	1878	7	19	USA	OH	Toledo	1916	12	23	USA	OH	Toledo	Erve	Beck	Ervin F.	168	70	R	R	1899-09-19	1902-09-27	becke101	becker01
beckeri01	1972	2	1	USA	IL	Aurora							Rich	Becker	Richard Godhard	180	70	L	L	1993-09-10	2000-10-01	beckr002	beckeri01
beckero01	1972	7	16	USA	TX	Austin							Robbie	Beckett	Robert Joseph	240	77	R	L	1996-09-12	1997-09-26	beckr003	beckero01
beckfr01	1858	11		USA	NY	Poughkeepsie							Frank	Beck	Frank J.	141	69		R	1884-05-02	1884-09-18	beckf102	beckfr01
beckfr02	1886	11	17	USA	IL	Havana	1962	3	12	USA	IL	Havana	Fred	Beck	Frederick Thomas	180	73	L	L	1909-04-14	1915-10-03	beckf101	beckfr02
beckge01	1890	2	21	USA	IN	South Bend	1973	10	29	USA	IN	South Bend	George	Beck	Ernest George Bernard	165	71	R	R	1914-05-15	1914-05-15	beckg102	beckge01
beckhgo01	1986	9	16	USA	GA	Atlanta							Gordon	Beckham	James Gordon	190	72	R	R	2009-06-04	2016-10-01	beckg001	beckhgo01
beckhti01	1990	1	27	USA	GA	Griffin							Tim	Beckham	Timothy Lamar	205	73	R	R	2013-09-19	2017-06-16	beckt001	beckhti01
becklja01	1867	8	4	USA	MO	Hannibal	1918	6	25	USA	MO	Kansas City	Jake	Beckley	Jacob Peter	200	70	L	L	1888-06-20	1907-06-15	beckj103	becklja01
beckmbi01	1907	12	8	USA	MO	Clayton	1990	1	2	USA	MO	Florissant	Bill	Beckmann	William Aloysius	175	72	R	R	1939-05-02	1942-09-20	beckb103	beckmbi01
beckmji01	1905	3	1	USA	OH	Cincinnati	1974	12	5	USA	OH	Montgomery	Jim	Beckman	James Joseph	172	70	R	R	1927-07-27	1928-09-22	beckj101	beckmji01
beckri01	1940	1	21	USA	WA	Pasco							Rich	Beck	Richard Henry	190	75	B	R	1965-09-14	1965-09-28	beckr101	beckri01
beckro01	1968	8	3	USA	CA	Burbank	2007	6	23	USA	AZ	Phoenix	Rod	Beck	Rodney Roy	215	73	R	R	1991-05-06	2004-08-14	beckr001	beckro01
beckwjo01	1955	1	28	USA	AL	Auburn							Joe	Beckwith	Thomas Joseph	200	75	L	R	1979-07-21	1986-09-30	beckj001	beckwjo01
beckzi01	1885	9	30	USA	OH	Steubenville	1981	3	19	USA	FL	West Palm Beach	Zinn	Beck	Zinn Bertram	160	70	R	R	1913-09-14	1918-07-22	beckz101	beckzi01
becquju01	1931	12	20	Cuba	La Habana	La Habana							Julio	Becquer	Julio	178	71	L	L	1955-09-13	1963-09-18	becqj101	becquju01
bedarer01	1979	3	5	CAN	ON	Navan							Erik	Bedard	Erik Joseph	195	73	L	L	2002-04-17	2014-07-12	bedae001	bedarer01
bedelho01	1935	9	29	USA	PA	Clearfield							Howie	Bedell	Howard William	185	73	L	R	1962-04-10	1968-07-04	bedeh101	bedelho01
bedfoge01	1896	12	2	USA	TX	Dallas	1977	10	6	USA	TX	San Antonio	Gene	Bedford	William Eugene	170	68	B	R	1925-06-25	1925-09-16	bedfg101	bedfoge01
bedgoph01	1898	3	8	USA	GA	Harrison	1927	11	8	USA	FL	Fort Pierce	Phil	Bedgood	Phillip Burlette	218	75	R	R	1922-09-20	1923-09-15	bedgp101	bedgoph01
bediehu01	1889	10	23	USA	NY	Gerry	1965	7	21	USA	NY	Jamestown	Hugh	Bedient	Hugh Carpenter	185	72	R	R	1912-04-26	1915-09-29	bedih101	bediehu01
bednaan01	1908	8	16	USA	IL	Streator	1937	11	26	USA	TX	Stephens County	Andy	Bednar	Andrew Jackson	180	70	R	R	1930-09-06	1931-05-03	bedna101	bednaan01
bedroca01	1991	10	2	USA	GA	Senoia							Cam	Bedrosian	Cameron Rock	230	72	R	R	2014-06-03	2017-04-21	bedrc001	bedroca01
bedrost01	1957	12	6	USA	MA	Methuen							Steve	Bedrosian	Stephen Wayne	200	75	R	R	1981-08-14	1995-08-09	bedrs001	bedrost01
beebefr01	1879	12	31	USA	NE	Lincoln	1957	10	30	USA	IL	Elgin	Fred	Beebe	Frederick Leonard	190	73	R	R	1906-04-17	1916-09-30	beebf101	beebefr01
beeched01	1859	7	2	USA	CT	Guilford	1935	9	12	USA	CT	Hartford	Ed	Beecher	Edward Harry	185	70	L	L	1887-06-28	1891-07-16	beece101	beeched01
beeched02	1875	8	27	USA	MO	St. Louis	1939	7	15	USA	MO	St. Louis	Ed	Biecher	Edward					1897-09-26	1898-10-10	beece102	beeched02
beechma01	1972	1	20	USA	CA	Oakland							Matt	Beech	Lucas Matthew	190	74	L	L	1996-08-08	1998-08-09	beecm001	beechma01
beechro01	1884	5	10	USA	OH	Swanton	1952	10	11	USA	OH	Toledo	Roy	Beecher	Leroy	180	74	L	R	1907-09-29	1908-06-25	beecr101	beechro01
beeleda01	1989	6	12	USA	OK	Tulsa							Dallas	Beeler	Dallas James	225	77	R	R	2014-06-28	2015-07-28	beeld001	beeleda01
beelejo01	1921	11	26	USA	TX	Dallas	2002	10	8	USA	TX	Mesquite	Jodie	Beeler	Joseph Sam	170	72	R	R	1944-09-21	1944-10-01	beelj101	beelejo01
beenean01	1956	10	13	USA	TX	Freeport							Andy	Beene	Ramon Andrew	205	75	R	R	1983-09-22	1984-08-24	beena001	beenean01
beenefr01	1942	11	24	USA	TX	Angleton							Fred	Beene	Freddy Ray	155	69	B	R	1968-09-18	1975-09-28	beenf101	beenefr01
beerscl01	1918	12	9	USA	KS	El Dorado	2002	12	6	USA	AZ	Tucson	Clarence	Beers	Clarence Scott	175	72	R	R	1948-05-02	1948-05-02	beerc101	beerscl01
beggsjo01	1910	11	4	USA	PA	Rankin	1983	7	19	USA	IN	Indianapolis	Joe	Beggs	Joseph Stanley	182	73	R	R	1938-04-19	1948-04-24	beggj101	beggsjo01
begleed01	1863	10		USA	NY	New York	1919	7	24	USA	CT	Waterbury	Ed	Bagley	Edward H.	173	68			1884-05-03	1885-07-04	begle101	begleed01
beglege01	1861	6	7	USA	NY	New York	1901	8	15	USA	NY	Long Island City	Gene	Bagley	Eugene T.					1886-09-11	1886-10-01	beglg101	beglege01
begleji01	1902	9	19	USA	CA	San Francisco	1957	2	22	USA	CA	San Francisco	Jim	Begley	James Lawrence	145	66	R	R	1924-05-28	1924-05-28	beglj101	begleji01
behanpe01	1887	12	11	USA	PA	Dallas City	1957	1	22	USA	PA	North Warren	Petie	Behan	Charles Frederick	160	70	R	R	1921-09-16	1923-09-26	behap101	behanpe01
behelst01	1860	11	6	USA	IL	Earlville	1945	2	15	USA	CA	Los Angeles	Steve	Behel	Stephen Arnold Douglas					1884-09-27	1886-08-26	behes101	behelst01
behenri01	1960	3	6	USA	FL	Miami	2012	1	31	USA	GA	Newnan	Rick	Behenna	Richard Kipp	170	74	R	R	1983-04-12	1985-06-21	beher001	behenri01
behneme01	1947	9	2	USA	NJ	Newark							Mel	Behney	Melvin Brian	180	74	L	L	1970-08-14	1970-09-20	behnm101	behneme01
behrmha01	1921	6	27	USA	NY	Brooklyn	1987	1	20	USA	NY	New York	Hank	Behrman	Henry Bernard	174	71	R	R	1946-04-17	1949-09-18	behrh101	behrmha01
beimejo01	1977	4	19	USA	PA	St. Marys							Joe	Beimel	Joseph Ronald	205	75	L	L	2001-04-08	2015-10-03	beimj001	beimejo01
beirnke01	1974	1	1	USA	TX	Houston							Kevin	Beirne	Kevin Patrick	210	76	L	R	2000-05-17	2002-09-28	beirk001	beirnke01
bejmaol01	1907	9	12	USA	IN	South Bend	1995	1	3	USA	IN	South Bend	Ollie	Bejma	Aloysius Frank	165	70	R	R	1934-04-24	1939-10-01	bejmo101	bejmaol01
belanma01	1944	6	8	USA	MA	Pittsfield	1998	10	6	USA	NY	New York	Mark	Belanger	Mark Henry	170	73	R	R	1965-08-07	1982-10-02	belam101	belanma01
belarwa01	1930	9	5	USA	CA	St. Helena	1993	10	21	USA	CA	Santa Cruz	Wayne	Belardi	Carroll Wayne	185	73	L	L	1950-04-18	1956-09-30	belaw101	belarwa01
belchke01	1967	8	8	USA	TX	Waco							Kevin	Belcher	Kevin Donnell	170	72	R	R	1990-09-03	1990-10-03	belck001	belchke01
belchti01	1961	10	19	USA	OH	Mount Gilead							Tim	Belcher	Timothy Wayne	210	75	R	R	1987-09-06	2000-09-30	belct001	belchti01
beldeir01	1874	4	16	USA	OH	Cleveland	1916	7	15	USA	OH	Lakewood	Ira	Belden	Ira Allison	175	71	L	R	1897-09-17	1897-09-25	beldi101	beldeir01
belfimi01	1988	10	3	USA	NY	Huntington							Mike	Belfiore	Michael John	220	75	R	L	2013-09-27	2013-09-27	belfm001	belfimi01
belinbo01	1936	12	7	USA	NY	New York	2001	11	23	USA	NV	Las Vegas	Bo	Belinsky	Robert	191	74	L	L	1962-04-18	1970-05-18	belib101	belinbo01
belinst01	1966	8	6	USA	PA	Huntingdon							Stan	Belinda	Stanley Peter	185	75	R	R	1989-09-08	2000-09-03	belis001	belinst01
belisma01	1980	6	6	USA	TX	Austin							Matt	Belisle	Matthew Thomas	230	75	R	R	2003-09-07	2017-06-14	belim001	belisma01
belisro01	1982	12	31	Venezuela	Aragua	Maracay							Ronald	Belisario	Ronald J.	240	75	R	R	2009-04-07	2015-06-30	belir001	belisro01
belitto01	1975	10	23	USA	IA	Des Moines							Todd	Belitz	Todd Stephen	218	73	L	L	2000-09-04	2001-10-06	belit001	belitto01
belivje01	1987	1	17	USA	RI	Providence							Jeff	Beliveau	Jeffrey Ryan	190	73	L	L	2012-07-22	2017-06-16	belij001	belivje01
belkti01	1970	4	6	USA	OH	Cincinnati							Tim	Belk	Timothy William	200	75	R	R	1996-06-25	1996-07-03	belkt001	belkti01
bellaan01	1991	8	5	USA	CA	San Diego							Andrew	Bellatti	Andrew James	190	73	R	R	2015-05-09	2015-10-02	bella001	bellaan01
bellast01	1849	10	1	Cuba	La Habana	La Habana	1932	8	8	Cuba	La Habana	La Habana	Steve	Bellan	Stephen B.	154	68			1871-05-09	1873-06-09	bells101	bellast01
bellaze01	1930	8	23	USA	CT	Greenwich	2013	11	17	USA	CT	Greenwich	Zeke	Bella	John	185	71	R	L	1957-09-11	1959-09-25	bellz101	bellaze01
bellbe01	1907	8	20	USA	TX	Bellville	1977	9	14	USA	TX	Bryan	Beau	Bell	Roy Chester	185	74	R	R	1935-04-16	1941-09-01	bellb102	bellbe01
bellbi01	1933	10	24	USA	NC	Goldsboro	1962	10	11	USA	NC	Durham	Bill	Bell	William Samuel	200	75	R	R	1952-09-05	1955-04-16	bellb101	bellbi01
bellbu01	1951	8	27	USA	PA	Pittsburgh							Buddy	Bell	David Gus	180	73	R	R	1972-04-15	1989-06-17	bellb001	bellbu01
bellch01	1868	8	12	USA	OH	Cincinnati	1937	2	7	USA	OH	Cincinnati	Charlie	Bell	Charles C.				R	1889-10-13	1891-07-27	bellc101	bellch01
bellch02	1989	2	28	USA	TN	Knoxville							Chad	Bell	Chadwick Micah	200	75	R	L	2017-05-10	2017-06-13		bellch02
bellco99	1903	5	17	USA	MS	Starkville	1991	3	7	USA	MO	St. Louis	Cool Papa	Bell	James Thomas	155	72	B	L				bellco99
bellda01	1972	9	14	USA	OH	Cincinnati							David	Bell	David Michael	170	70	R	R	1995-05-03	2006-10-01	belld002	bellda01
bellde01	1968	12	11	USA	FL	Tampa							Derek	Bell	Derek Nathaniel	200	74	R	R	1991-06-28	2001-07-03	belld001	bellde01
belleal01	1966	8	25	USA	LA	Shreveport							Albert	Belle	Albert Jojuan	190	73	R	R	1989-07-15	2000-10-01	bellj002	belleal01
beller01	1963	10	27	USA	CA	Modesto							Eric	Bell	Eric Alvin	178	72	L	L	1985-09-24	1993-05-08	belle001	beller01
bellfe01	1913	1	21	USA	OK	Ada	2000	8	29	USA	CA	Rancho Mirage	Fern	Bell	Fernando Jerome Lee	180	72	R	R	1939-04-17	1940-05-06	bellf102	bellfe01
bellfr01	1862	12	11	USA	OH	Cincinnati	1891	4	14	USA	OH	Cincinnati	Frank	Bell	Frank Gustav		72			1885-07-07	1885-07-31	bellf101	bellfr01
bellga01	1936	11	17	USA	TX	San Antonio							Gary	Bell	Wilbur Gary	196	73	R	R	1958-06-01	1969-09-12	bellg102	bellga01
bellge01	1874	11	2	USA	NY	Greenwood	1941	12	25	USA	NY	New York	George	Bell	George Glenn	195	72	R	R	1907-04-17	1911-08-19	bellg101	bellge01
bellge02	1959	10	21	D.R.	San Pedro de Macoris	San Pedro de Macoris							George	Bell	George Antonio	190	73	R	R	1981-04-09	1993-10-02	bellg001	bellge02
bellgu01	1928	11	15	USA	KY	Louisville	1995	5	7	USA	OH	Montgomery	Gus	Bell	David Russell	190	73	L	R	1950-05-30	1964-05-01	bellg103	bellgu01
bellhe01	1977	9	29	USA	CA	Oceanside							Heath	Bell	Heath Justin	235	75	R	R	2004-08-24	2014-05-03	bellh001	bellhe01
bellhi01	1897	7	16	USA	KY	Mount Sherman	1949	6	7	USA	CA	Glendale	Hi	Bell	Herman S.	185	72	R	R	1924-04-16	1934-08-23	bellh101	bellhi01
bellhma01	1974	8	23	USA	MA	South Weymouth							Mark	Bellhorn	Mark Christian	195	73	B	R	1997-06-10	2007-09-30	bellm002	bellhma01
bellicl01	1968	11	18	USA	NY	Oneonta							Clay	Bellinger	Clayton Daniel	195	75	R	R	1999-04-09	2002-04-08	bellc001	bellicl01
bellico01	1995	7	13	USA	AZ	Scottsdale							Cody	Bellinger	Cody James	210	76	L	L	2017-04-25	2017-06-16		bellico01
bellira01	1961	10	24	D.R.	Valverde	Pueblo Nuevo							Rafael	Belliard	Rafael Leonidas	160	66	R	R	1982-09-06	1998-04-09	bellr001	bellira01
belliro01	1975	4	7	USA	NY	New York							Ronnie	Belliard	Ronald	210	69	R	R	1998-09-12	2010-09-06	bellr002	belliro01
bellja01	1965	12	11	USA	FL	Pensacola							Jay	Bell	Jay Stuart	180	73	R	R	1986-09-29	2003-09-28	bellj001	bellja01
bellje01	1947	10	6	USA	TN	Madison							Jerry	Bell	Jerry Houston	190	76	B	R	1971-09-06	1974-05-15	bellj101	bellje01
belljo01	1986	11	13	USA	IL	Rockford							Josh	Bell	Joshua Lee	230	75	B	R	2010-07-01	2012-06-26	bellj004	belljo01
belljo02	1992	8	14	USA	TX	Irving							Josh	Bell	Joshua Evan	230	74	B	R	2016-07-08	2017-06-16	bellj005	belljo02
bellju01	1968	3	29	D.R.	San Pedro de Macoris	San Pedro de Macoris	2016	8	24	D.R.	Distrito Nacional	Santo Domingo	Juan	Bell	Juan	172	71	R	R	1989-09-06	1995-08-25	bellj003	bellju01
bellke01	1955	7	13	USA	CA	Los Angeles							Kevin	Bell	Kevin Robert	195	72	R	R	1976-06-16	1982-10-03	bellk101	bellke01
bellle01	1901	12	14	USA	PA	Harrisburg	1985	12	26	USA	PA	Hershey	Les	Bell	Lester Rowland	165	71	R	R	1923-09-17	1931-09-27	belll101	bellle01
bellmi01	1968	4	22	USA	NY	Lewiston							Mike	Bell	Michael Allen	175	73	L	L	1990-05-02	1991-10-06	bellm001	bellmi01
bellmi02	1974	12	7	USA	OH	Cincinnati							Mike	Bell	Michael John	195	74	R	R	2000-07-20	2000-10-01	bellm003	bellmi02
bellmja01	1864	3	4	USA	KY	Louisville	1931	12	8	USA	KY	Louisville	Jack	Bellman	John Hutchins					1889-04-23	1889-04-23	bellj102	bellmja01
belloed01	1982	2	21	Venezuela	Bolivar	San Felix							Edwin	Bellorin	Edwin Daniel	240	70	R	R	2007-08-07	2009-06-06	belle002	belloed01
belloro01	1948	7	13	Germany	Baden-Wurttemberg	Heidelberg							Rob	Belloir	Robert Edward	155	70	R	R	1975-08-02	1978-09-29	bellr102	belloro01
bellra01	1890	11	6	USA	MO	Kahoka	1959	10	18	USA	IA	Burlington	Ralph	Bell	Ralph Albert	170	71	L	L	1912-07-16	1912-07-22	bellr101	bellra01
bellro01	1977	1	17	USA	NY	Newburgh							Rob	Bell	Robert Allen	225	77	R	R	2000-04-08	2007-09-30	bellr003	bellro01
bellru01	1881	1	1	USA	WI	Wausau	1955	7	28	USA	NM	Albuquerque	Rudy	Bell	Jack	158	68	R	R	1907-09-16	1907-10-05	bellr103	bellru01
bellte01	1962	10	27	USA	OH	Dayton							Terry	Bell	Terence William	195	72	R	R	1986-09-03	1987-09-15	bellt001	bellte01
belltr01	1986	10	12	USA	CA	North Hollywood							Trevor	Bell	Trevor Daniel	205	74	L	R	2009-08-12	2014-04-07	bellt002	belltr01
belnovi01	1988	3	11	USA	PA	Coatesville							Vince	Belnome	Vincent Michael	205	71	L	R	2014-07-03	2014-08-19	belnv001	belnovi01
belowdu01	1985	11	15	USA	MI	Britton							Duane	Below	Duane Arthur	210	75	L	L	2011-07-20	2013-05-27	belod001	belowdu01
beltbr01	1988	4	20	USA	TX	Nacogdoches							Brandon	Belt	Brandon Kyle	220	77	L	L	2011-03-31	2017-06-16	beltb001	beltbr01
beltrad01	1979	4	7	D.R.	Distrito Nacional	Santo Domingo							Adrian	Beltre	Adrian	220	71	R	R	1998-06-24	2017-06-16	belta001	beltrad01
beltrca01	1977	4	24	P.R.		Manati							Carlos	Beltran	Carlos Ivan	215	73	B	R	1998-09-14	2017-06-16	beltc001	beltrca01
beltren01	1989	11	1	D.R.	Distrito Nacional	Santo Domingo							Engel	Beltre	Engel Manuel	180	74	L	L	2013-06-26	2013-09-23	belte002	beltren01
beltres01	1967	12	26	D.R.	San Pedro de Macoris	Quisqueya							Esteban	Beltre	Esteban	155	70	R	R	1991-09-03	1996-06-05	belte001	beltres01
beltrfr01	1979	11	29	D.R.	Distrito Nacional	Santo Domingo							Francis	Beltran	Francis LeBron	255	78	R	R	2002-06-28	2008-08-24	beltf001	beltrfr01
beltrom01	1981	8	24	D.R.	Distrito Nacional	Santo Domingo							Omar	Beltre	Omar	230	75	R	R	2010-06-30	2010-07-05	belto001	beltrom01
beltrri01	1969	11	13	Mexico	Baja California	Tijuana							Rigo	Beltran	Rigoberto	185	71	L	L	1997-06-02	2004-04-28	beltr001	beltrri01
bemisha01	1874	2	1	USA	NH	Farmington	1947	5	23	USA	OH	Cleveland	Harry	Bemis	Harry Parker	155	66	R	R	1902-04-23	1910-08-15	bemih101	bemisha01
benarma01	1971	1	20	Nicaragua	Atlantico Sur	Bluefields							Marvin	Benard	Marvin Larry	180	70	L	L	1995-09-05	2003-09-27	benam001	benarma01
benavfr01	1966	4	7	USA	TX	Laredo							Freddie	Benavides	Alfredo	180	74	R	R	1991-05-14	1994-08-11	benaf001	benavfr01
benchjo01	1947	12	7	USA	OK	Oklahoma City							Johnny	Bench	Johnny Lee	197	73	R	R	1967-08-28	1983-09-29	bencj101	benchjo01
bendech01	1884	5	5	USA	MN	Crow Wing County	1954	5	22	USA	PA	Philadelphia	Chief	Bender	Charles Albert	185	74	R	R	1903-04-20	1925-07-21	bendc101	bendech01
benedar01	1862	3	31	USA	IL	Cornwall	1948	1	14	USA	CO	Denver	Art	Benedict	Arthur Melville			R	R	1883-05-14	1883-06-06	benea101	benedar01
benedbr01	1955	8	18	USA	AL	Birmingham							Bruce	Benedict	Bruce Edwin	175	73	R	R	1978-08-18	1989-09-11	beneb001	benedbr01
benesal01	1972	1	21	USA	IN	Evansville							Alan	Benes	Alan Paul	215	77	R	R	1995-09-19	2003-05-28	benea002	benesal01
benesan01	1967	8	20	USA	IN	Evansville							Andy	Benes	Andrew Charles	235	78	R	R	1989-08-11	2002-09-29	benea001	benesan01
benesjo01	1901	1	8	USA	NY	Long Island City	1975	3	7	USA	NY	Elmhurst	Joe	Benes	Joseph Anthony	158	68	R	R	1931-05-09	1931-06-14	benej101	benesjo01
bengera01	1902	4	22	USA	TX	Jacksonville	1997	6	27	USA	TX	Centerville	Ray	Benge	Raymond Adelphia	160	69	R	R	1925-09-26	1938-06-02	bengr101	bengera01
bengobe01	1898	7	27	USA	NY	Niagara Falls	1968	12	22	USA	PA	Philadelphia	Benny	Bengough	Bernard Oliver	168	67	R	R	1923-05-18	1932-09-24	bengb101	bengobe01
beninan01	1994	7	6	USA	OH	Cincinnati							Andrew	Benintendi	Andrew S.	170	70	L	L	2016-08-02	2017-06-16	benia002	beninan01
beniqju01	1950	5	13	P.R.		San Sebastian							Juan	Beniquez	Juan Jose	150	71	R	R	1971-09-04	1988-05-30	benij001	beniqju01
benitar01	1972	11	3	D.R.	San Pedro de Macoris	Ramon Santana							Armando	Benitez	Armando German	180	76	R	R	1994-07-28	2008-06-06	benia001	benitar01
benitya01	1972	10	5	P.R.		San Juan							Yamil	Benitez	Yamil Antonio	195	74	R	R	1995-09-15	1998-09-27	beniy001	benitya01
benjami01	1965	11	22	USA	OH	Euclid							Mike	Benjamin	Michael Paul	195	75	R	R	1989-07-07	2002-09-28	benjm001	benjami01
benjast01	1914	5	20	USA	MA	Framingham	2009	12	24	USA	MA	Harwich	Stan	Benjamin	Alfred Stanley	194	74	R	R	1939-09-16	1945-09-16	benjs101	benjast01
bennech01	1854	11	21	USA	PA	New Castle	1927	2	24	USA	MI	Detroit	Charlie	Bennett	Charles Wesley	180	71	R	R	1878-05-01	1893-09-30	bennc101	bennech01
benneda01	1945	11	7	USA	CA	Berkeley							Dave	Bennett	David Hans	195	77	R	R	1964-06-12	1964-06-12	bennd102	benneda01
bennede01	1939	10	5	USA	CA	Oakland	2012	3	24	USA	OR	Klamath Falls	Dennis	Bennett	Dennis John	192	75	L	L	1962-05-12	1968-09-29	bennd101	bennede01
benneer01	1968	9	13	USA	CA	Yreka							Erik	Bennett	Erik Hans	205	74	R	R	1995-05-15	1996-06-08	benne001	benneer01
bennefr01	1904	10	27	USA	MD	Mardela Springs	1966	3	18	USA	DE	Wilmington	Frank	Bennett	Francis Allen	163	70	R	R	1927-09-17	1928-04-11	bennf102	bennefr01
bennefr02	1902	3	15	USA	AR	Atkins	1957	5	12	USA	AR	Atkins	Fred	Bennett	James Fred	185	69	R	R	1928-04-13	1931-07-28	bennf101	bennefr02
bennega01	1972	4	17	USA	IL	Waukegan							Gary	Bennett	Gary David	190	72	R	R	1995-09-24	2008-05-18	benng001	bennega01
bennehe01	1896	9	21	USA	MO	Elwood	1964	9	9	USA	MO	Springfield	Herschel	Bennett	Herschel Emmett	160	69	L	R	1923-04-19	1927-10-01	bennh102	bennehe01
benneik01	1856	6	7	USA	PA	Philadelphia	1932	4	18	USA	PA	Philadelphia	Ike	Benners	Isaac B.	175		L		1884-05-01	1884-09-03	benni101	benneik01
benneje01	1980	6	10	USA	TN	Donelson							Jeff	Bennett	David Jeffrey	200	75	R	R	2004-04-06	2009-10-04	bennj002	benneje01
bennejo01	1900	7	2	USA	NY	New York	1987	7	11	USA	CA	Morro Bay	Joe	Bennett	Joseph Rosenblum	168	69	R	R	1923-07-05	1923-07-05	bennj101	bennejo01
bennejo02	1970	1	31	USA	NY	Binghamton							Joel	Bennett	Joel Todd	160	73	R	R	1998-07-15	1999-06-06	bennj001	bennejo02
bennepu01	1874	2	20	USA	NE	Ponca	1935	9	10	USA	WA	Kirkland	Pug	Bennett	Justin Titus	165	71	L	R	1906-04-12	1907-09-20	bennp101	bennepu01
bennesh01	1972	4	10	Australia	South Australia	Adelaide							Shayne	Bennett	Shayne Anthony	200	77	R	R	1997-08-22	1999-08-15	benns001	bennesh01
bennhe01	1890	1	25	USA	WI	Viola	1967	6	4	USA	WI	Madison	Henry	Benn	Henry Omer	190	72	R	R	1914-09-24	1914-09-24	bennh101	bennhe01
benoijo01	1977	7	26	D.R.	Santiago	Santiago							Joaquin	Benoit	Joaquin Antonio	250	76	R	R	2001-08-08	2017-06-16	benoj001	benoijo01
bensoal01	1905	3	28	USA	SD	Hurley	1999	11	16	USA	SD	Viborg	Allen	Benson	Allen Wilbert	185	73	R	R	1934-08-19	1934-08-26	bensa101	bensoal01
bensojo01	1988	3	5	USA	IL	Hinsdale							Joe	Benson	William Joseph	205	73	R	R	2011-09-06	2011-09-28	bensj001	bensojo01
bensokr01	1974	11	7	USA	GA	Kennesaw							Kris	Benson	Kristen James	190	76	R	R	1999-04-09	2010-04-28	bensk001	bensokr01
bensove01	1924	9	19	USA	NC	Granite Quarry	2014	1	20	USA	NC	Salisbury	Vern	Benson	Vernon Adair	160	70	L	R	1943-07-31	1953-05-30	bensv101	bensove01
bentlcy01	1850	11	23	USA	CT	East Haven	1873	2	26	USA	CT	Middletown	Cy	Bentley	Clytus George					1872-04-26	1872-08-09	bentc101	bentlcy01
bentlja01	1895	3	8	USA	MD	Sandy Spring	1969	10	24	USA	MD	Olney	Jack	Bentley	John Needles	200	71	L	L	1913-09-06	1927-05-20	bentj101	bentlja01
bentoal01	1911	3	18	USA	OK	Noble	1968	4	14	USA	CA	Lynwood	Al	Benton	John Alton	215	76	R	R	1934-04-18	1952-09-21	benta101	bentoal01
bentobu01	1957	8	24	USA	FL	Tampa							Butch	Benton	Alfred Lee	190	73	R	R	1978-09-14	1985-06-15	bentb001	bentobu01
bentola01	1897	11	20	USA	MO	St. Louis	1953	4	3	USA	OH	Amberley	Larry	Benton	Lawrence James	165	71	R	R	1923-04-19	1935-08-16	bentl101	bentola01
bentora01	1901	9	29	USA	KY	Cannel City	1984	6	7	USA	TX	Mesquite	Rabbit	Benton	Stanley W.	150	67	R	R	1922-09-13	1922-09-19	bentr101	bentora01
bentoru01	1890	6	27	USA	NC	Clinton	1937	12	12	USA	AL	Dothan	Rube	Benton	John Cleave	190	73	R	L	1910-06-28	1925-09-21	bentr102	bentoru01
bentosi01	1894	8	4	USA	AR	Buckner	1977	3	8	USA	AR	Fayetteville	Sid	Benton	Sidney Wright	170	73	R	R	1922-04-18	1922-04-18	bents101	bentosi01
bentzch01	1980	5	5	USA	AK	Juneau							Chad	Bentz	Chad Robert	215	74	R	L	2004-04-07	2005-06-21	bentc001	bentzch01
benzito01	1963	2	11	USA	KY	Dayton							Todd	Benzinger	Todd Eric	185	73	B	R	1987-06-21	1995-05-14	benzt001	benzito01
benzjo01	1886	1	21	USA	IN	New Alsace	1957	4	22	USA	IL	Chicago	Joe	Benz	Joseph Louis	196	73	R	R	1911-08-16	1919-05-02	benzj101	benzjo01
berarjo01	1917	5	1	USA	CA	Los Angeles	1996	5	19	USA	CA	Los Angeles	Johnny	Berardino	John	175	71	R	R	1939-04-22	1952-09-19	beraj101	berarjo01
berbelo01	1929	11	20	USA	CA	Long Beach	2004	4	6	USA	NV	Las Vegas	Lou	Berberet	Louis Joseph	200	71	L	R	1954-09-17	1960-09-25	berbl101	berbelo01
berblje01	1970	11	19	USA	KS	Wichita							Jeff	Berblinger	Jeffrey James	190	72	R	R	1997-09-07	1997-09-27	berbj001	berblje01
bereja01	1971	5	26	USA	MA	Cambridge							Jason	Bere	Jason Phillip	185	75	R	R	1993-05-27	2003-05-27	berej002	bereja01
berenbr01	1954	8	21	USA	OH	Bryan							Bruce	Berenyi	Bruce Michael	205	75	R	R	1980-07-05	1986-07-09	bereb001	berenbr01
berenju01	1954	11	30	Panama	Cocle	Aguadulce							Juan	Berenguer	Juan Bautista	186	71	R	R	1978-08-17	1992-10-04	berej001	berenju01
beresja01	1989	1	19	Australia	Victoria	Mount Waverley							James	Beresford	James Richard	170	73	L	R	2016-09-10	2016-10-01	berej003	beresja01
bergaau01	1917	2	14	USA	MI	Detroit	1974	8	19	USA	MI	Grosse Pointe	Augie	Bergamo	August Samuel	165	69	L	L	1944-04-25	1945-09-30	berga102	bergaau01
bergda01	1970	9	3	USA	CA	Roseville							Dave	Berg	David Scott	185	71	R	R	1998-04-02	2004-09-29	bergd002	bergda01
bergebi01	1878	6	13	USA	MA	North Brookfield	1943	12	19	USA	MA	Worcester	Bill	Bergen	William Aloysius	184	72	R	R	1901-05-06	1911-09-20	bergb102	bergebi01
bergebo01	1910	5	13	USA	MD	Baltimore	1992	11	3	USA	MD	Bethesda	Boze	Berger	Louis William	180	74	R	R	1932-08-17	1939-09-30	bergb101	bergebo01
bergebr01	1975	2	21	USA	KY	Covington							Brandon	Berger	Brandon Charles	205	71	R	R	2001-09-09	2004-06-13	bergb001	bergebr01
bergebr02	1985	9	25	USA	CA	Fairfield							Brad	Bergesen	Bradley Steven	210	74	L	R	2009-04-21	2012-10-01	bergb002	bergebr02
bergecl01	1894	11	1	USA	OH	East Cleveland	1959	6	30	USA	DC	Washington	Clarence	Berger	Clarence Edward	185	72	L	R	1914-09-23	1914-10-05	bergc101	bergecl01
bergehe01	1882	1	7	USA	IL	LaSalle	1954	2	10	USA	OH	Lakewood	Heinie	Berger	Charles Carl		69	R	R	1907-05-06	1910-07-22	bergh101	bergehe01
bergejo01	1886	12	20	USA	MO	St. Louis	1956	3	6	USA	IL	Rock Island	Joe	Berger	Joseph August	170	70	R	R	1913-04-11	1914-09-27	bergj103	bergejo01
bergejo02	1901	8	27	USA	PA	Philadelphia	1979	5	7	USA	LA	Lake Charles	Johnny	Berger	John Henne	165	69	R	R	1922-04-20	1927-09-06	bergj102	bergejo02
bergema01	1871	10	25	USA	MA	North Brookfield	1900	1	19	USA	MA	North Brookfield	Marty	Bergen	Martin	170	70		R	1896-04-17	1899-10-13	bergm102	bergema01
bergepe01	1977	11	9	USA	MA	Greenfield							Peter	Bergeron	Peter Francis	185	74	L	R	1999-09-07	2004-04-18	bergp001	bergepe01
bergetu01	1867	12	6	USA	PA	Pittsburgh	1907	6	10	USA	PA	Pittsburgh	Tun	Berger	John Henry	178	66		R	1890-05-09	1892-08-28	bergt101	bergetu01
bergewa01	1905	10	10	USA	IL	Chicago	1988	11	30	USA	CA	Redondo Beach	Wally	Berger	Walter Anton	198	74	R	R	1930-04-15	1940-07-04	bergw101	bergewa01
berghjo01	1857	10	8	USA	MA	Boston	1883	4	17	USA	MA	Boston	John	Bergh	John Baptist					1876-08-05	1880-06-09	bergj101	berghjo01
berghma01	1888	6	18	USA	PA	Elliott	1957	12	21	USA	PA	Pittsburgh	Marty	Berghammer	Martin Andrew	172	69	L	R	1911-09-08	1915-10-03	bergm101	berghma01
bergju01	1984	6	7	USA	WI	Antigo							Justin	Berg	Justin Christopher	225	75	R	R	2009-08-13	2011-05-25	bergj002	bergju01
bergmal01	1889	9	27	USA	IN	Peru	1961	6	21	USA	IN	Fort Wayne	Al	Bergman	Alfred Henry	155	67	R	R	1916-08-29	1916-09-12	berga101	bergmal01
bergmch01	1988	5	4	USA	CA	Glendale							Christian	Bergman	Christian Stanford	195	73	R	R	2014-06-09	2017-06-13	bergc001	bergmch01
bergmda01	1953	6	6	USA	IL	Evanston	2015	2	2	USA	MI	Detroit	Dave	Bergman	David Bruce	185	73	L	L	1975-08-26	1992-10-04	bergd001	bergmda01
bergmdu01	1978	2	1	USA	NV	Carson City							Dusty	Bergman	Dustin Michael	200	77	L	L	2004-06-09	2004-06-09	bergd003	bergmdu01
bergmja01	1981	9	25	USA	NJ	Neptune							Jason	Bergmann	Jason Chris	220	75	R	R	2005-08-28	2010-04-14	bergj001	bergmja01
bergmo01	1902	3	2	USA	NY	New York	1972	5	29	USA	NJ	Belleville	Moe	Berg	Morris	185	73	R	R	1923-06-27	1939-09-01	bergm103	bergmo01
bergmse01	1970	4	11	USA	IL	Joliet							Sean	Bergman	Sean Frederick	205	76	R	R	1993-07-07	2000-06-17	bergs001	bergmse01
bergowi01	1983	2	4	Venezuela	Carabobo	Carabobo							William	Bergolla	William Jose	195	70	R	R	2005-05-09	2005-06-25	bergw001	bergowi01
berkefr01	1853	7	27	USA	PA	Philadelphia	1932	6	10	USA	NJ	Merchantville	Frank	Berkelbach	Frank Pierce	182	72			1884-07-04	1884-07-12	berkf101	berkefr01
berkeja01	1983	11	27	USA	WI	Green Bay							Jason	Berken	Jason Thomas	210	72	R	R	2009-05-26	2012-10-01	berkj001	berkeja01
berkena01	1831			USA	PA		1900	2	23	USA	PA	Philadelphia	Nate	Berkenstock	Nathan					1871-10-30	1871-10-30	berkn101	berkena01
berkmla01	1976	2	10	USA	TX	Waco							Lance	Berkman	William Lance	220	73	B	L	1999-07-16	2013-09-17	berkl001	berkmla01
berlyja01	1903	5	24	USA	LA	Natchitoches	1977	6	26	USA	TX	Houston	Jack	Berly	John Chambers	190	71	R	R	1924-04-22	1933-09-24	berlj101	berlyja01
bermabo01	1899	1	24	USA	NY	New York	1988	8	2	USA	CT	Bridgeport	Bob	Berman	Robert Leon	147	68	R	R	1918-06-04	1918-06-12	bermb101	bermabo01
bernacu01	1878	2	18	USA	WV	Parkersburg	1955	4	10	USA	CA	Culver City	Curt	Bernard	Curtis Henry	150	70	L	R	1900-09-17	1901-06-24	bernc101	bernacu01
bernadw01	1952	5	31	USA	IL	Mount Vernon							Dwight	Bernard	Dwight Vern	170	74	R	R	1978-06-29	1982-10-02	bernd101	bernadw01
bernajo01	1882	3	24	USA	IL	Brighton	1960	9	22	USA	IL	Springfield	Joe	Bernard	Joseph Carl	175	73	R	R	1909-09-23	1909-09-23	bernj102	bernajo01
bernaro01	1984	6	12	Curacao		Willemstad							Roger	Bernadina	Rogearvin Argelo	210	74	L	L	2008-06-29	2014-09-28	bernr001	bernaro01
bernato01	1956	8	24	P.R.		Caguas							Tony	Bernazard	Antonio	150	69	B	R	1979-07-13	1991-04-26	bernt001	bernato01
bernavi01	1953	10	6	USA	CA	Los Angeles	2006	9	2	USA	CA	Arcadia	Victor	Bernal	Victor Hugo	175	73	R	R	1977-04-06	1977-05-17	bernv101	bernavi01
bernead01	1976	11	28	USA	CA	San Jose							Adam	Bernero	Adam Gino	205	76	R	R	2000-08-01	2006-09-30	berna001	bernead01
bernhbi01	1871	3	16	USA	NY	Clarence	1949	3	30	USA	CA	San Diego	Bill	Bernhard	William Henry	205	73	B	R	1899-04-24	1907-09-27	bernb101	bernhbi01
bernhju01	1953	8	31	D.R.	San Pedro de Macoris	San Pedro de Macoris							Juan	Bernhardt	Juan Ramon	160	71	R	R	1976-07-10	1979-04-08	bernj101	bernhju01
bernhwa01	1893	5	20	USA	PA	Pleasant Village	1958	7	26	USA	NY	Watertown	Walter	Bernhardt	Walter Jacob	175	74	R	R	1918-07-16	1918-07-16	bernw101	bernhwa01
bernica01	1927	1	28	P.R.		Juana Diaz	1989	4	6	P.R.		Juana Diaz	Carlos	Bernier	Carlos	180	69	R	R	1953-04-22	1953-09-22	bernc102	bernica01
bernido01	1980	6	24	USA	CA	Santa Maria							Doug	Bernier	Douglas Howell	185	73	R	R	2008-06-17	2015-05-17	bernd001	bernido01
berojo01	1922	12	22	USA	WV	Gary	1985	5	11	USA	CA	Gardena	Johnny	Bero	John George	170	72	L	R	1948-09-26	1951-07-22	beroj101	berojo01
berrada01	1956	12	13	USA	NJ	Ridgewood							Dale	Berra	Dale Anthony	180	72	R	R	1977-08-22	1987-10-04	berrd001	berrada01
berrade01	1887	10	8	USA	MA	Merrimac	1943	4	28	USA	MA	Boston	Dennis	Berran	Dennis Martin		71	L	L	1912-08-11	1912-08-11	berrd101	berrade01
berrayo01	1925	5	12	USA	MO	St. Louis	2015	9	22	USA	NJ	West Caldwell	Yogi	Berra	Lawrence Peter	185	67	L	R	1946-09-22	1965-05-09	berry101	berrayo01
berrera01	1907	8	31	USA	WI	Kenosha	2007	2	1	USA	WI	Kenosha	Ray	Berres	Raymond Frederick	170	69	R	R	1934-04-24	1945-09-30	berrr101	berrera01
berrijo01	1994	5	27	P.R.		Bayamon							Jose	Berrios	Jose Orlando	185	72	R	R	2016-04-27	2017-06-15	berrj001	berrijo01
berroan01	1978	1	27	D.R.	Distrito Nacional	Santo Domingo							Angel	Berroa	Angel Maria	195	72	R	R	2001-09-18	2009-08-06	berra001	berroan01
berroge01	1965	3	18	D.R.	Distrito Nacional	Santo Domingo							Geronimo	Berroa	Geronimo Emiliano Letta	165	72	R	R	1989-04-05	2000-05-30	berrg001	berroge01
berrych01	1860	9	6	USA	NJ	Elizabeth	1940	2	16	USA	NJ	Phillipsburg	Charlie	Berry	Charles Joseph	175	71	R	R	1884-04-30	1884-08-27	berrc102	berrych01
berrych02	1902	10	18	USA	NJ	Phillipsburg	1972	9	6	USA	IL	Evanston	Charlie	Berry	Charles Francis	185	72	R	R	1925-06-15	1938-09-08	berrc103	berrych02
berrycl01	1880	2	14	USA	IN	Losantville	1974	2	1	USA	IN	Richmond	Claude	Berry	Claude Elzy	165	67	R	R	1904-04-22	1915-10-03	berrc101	berrycl01
berryda01	1963	12	3	USA	CA	South Laguna							Damon	Berryhill	Damon Scott	205	72	B	R	1987-09-05	1997-09-28	berrd002	berryda01
berryjo01	1872	9	10	USA	OH	Steubenville	1961	3	13	USA	NJ	Allenwood	Joe	Berry	Joseph Howard	172	69	B	R	1902-09-04	1902-09-04	berrj101	berryjo01
berryjo02	1894	12	31	USA	PA	Philadelphia	1976	4	29	USA	PA	Philadelphia	Joe	Berry	Joseph Howard	159	70	B	R	1921-07-18	1922-05-16	berrj103	berryjo02
berryjo03	1904	12	16	USA	AR	Huntsville	1958	9	27	USA	CA	Anaheim	Joe	Berry	Jonas Arthur	145	70	L	R	1942-09-06	1946-09-21	berrj102	berryjo03
berryke01	1941	5	10	USA	MO	Kansas City							Ken	Berry	Allen Kent	175	72	R	R	1962-09-09	1975-05-31	berrk101	berryke01
berryne01	1922	1	11	USA	MI	Kalamazoo	2016	8	24	USA	MI	Kalamazoo	Neil	Berry	Cornelius John	168	70	R	R	1948-04-20	1954-05-11	berrn101	berryne01
berryqu01	1984	11	21	USA	CA	San Diego							Quintin	Berry	Quintin Lonell	195	73	L	L	2012-05-23	2015-10-04	berrq001	berryqu01
berryse01	1966	3	22	USA	CA	Santa Monica							Sean	Berry	Sean Robert	200	71	R	R	1990-09-17	2000-07-24	berrs001	berryse01
berryto01	1842	12	31	USA	PA	Chester	1915	6	6	USA	PA	Chester	Tom	Berry	Thomas Haney	140	66			1871-09-02	1871-09-02	berrt101	berryto01
bertafr01	1944	4	14	USA	CA	San Francisco	2010	3	3	USA	CA	Santa Rosa	Frank	Bertaina	Frank Louis	177	71	L	L	1964-08-01	1970-09-25	bertf101	bertafr01
bertedi01	1935	11	21	USA	IL	Oak Park	1999	12	20	USA	CA	Mission Viejo	Dick	Bertell	Richard George	200	72	R	R	1960-09-22	1967-04-12	bertd101	bertedi01
berteha01	1872	5	10	USA	KY	Covington	1952	5	6	USA	CA	Los Angeles	Harry	Berte	Harry Thomas	160	70		R	1903-09-17	1903-09-22	berth102	berteha01
berthha01	1844	1	1	USA	NY	Mumford	1928	4	24	USA	MA	Chelsea	Harry	Berthrong	Henry Washburn	140	66			1871-05-05	1871-07-04	berth101	berthha01
bertomi01	1970	1	18	USA	NJ	Jersey City							Mike	Bertotti	Michael David	185	73	L	L	1995-07-29	1997-05-10	bertm001	bertomi01
bertore01	1935	1	8	Italy	Friuli-Venezia Giulia	San Vito al Tagliamento	2011	4	15	CAN	ON	Windsor	Reno	Bertoia	Pierino Peter	185	71	R	R	1953-09-22	1962-04-28	bertr101	bertore01
bertrle01	1909	2	28	USA	MN	Cobden	2002	3	17	USA	OR	The Dalles	Lefty	Bertrand	Roman Mathias	180	72	R	L	1936-04-15	1936-04-15	bertl101	bertrle01
beruman01	1971	4	5	Mexico	Baja California	Tijuana							Andres	Berumen	Andres	210	74	R	R	1995-04-27	1996-06-17	berua001	beruman01
besanfr01	1930	4	5	USA	CA	Lincoln	2015	11	7	USA	CA	Roseville	Fred	Besana	Frederick Cyril	200	75	R	L	1956-04-18	1956-05-13	besaf101	besanfr01
beschbo01	1884	2	25	USA	OH	London	1942	11	29	USA	OH	London	Bob	Bescher	Robert Henry	200	73	B	L	1908-09-05	1918-09-01	bescb101	beschbo01
bessedo01	1931	3	13	USA	FL	Jacksonville	1990	7	7	USA	FL	Jacksonville	Don	Bessent	Fred Donald	175	72	R	R	1955-07-17	1958-09-27	bessd101	bessedo01
bessehe01	1911	8	16	USA	MO	St. Louis	1972	8	13	USA	CA	Los Angeles	Herman	Besse	Herman A.	190	74	L	L	1940-04-19	1946-05-22	bessh101	bessehe01
besti01				USA	NY	New York							William	Bestick	William					1872-06-20	1872-07-09	bestu101	besti01
bestka01	1959	3	6	USA	WA	Aberdeen							Karl	Best	Karl Jon	190	76	R	R	1983-08-19	1988-06-20	bestk001	bestka01
beswiji01	1958	2	12	USA	PA	Wilkinsburg							Jim	Beswick	James William	180	73	B	R	1978-08-09	1978-09-30	beswj101	beswiji01
betande01	1988	3	23	USA	NY	New York							Dellin	Betances	Dellin	265	80	R	R	2011-09-22	2017-06-15	betad001	betande01
betanra01	1975	4	29	Venezuela	Sucre	Cumana							Rafael	Betancourt	Rafael Jose	215	74	R	R	2003-07-13	2015-08-22	betar001	betanra01
betanyu01	1982	1	31	Cuba	Villa Clara	Santa Clara							Yuniesky	Betancourt	Yuniesky	205	70	R	R	2005-07-28	2013-09-29	betay001	betanyu01
betchfr01	1888	2	15	USA	PA	Philadelphia	1981	11	27	USA	PA	Wynnewood	Frank	Betcher	Franklin Lyle	173	71	B	R	1910-05-21	1910-10-13	betcf101	betchfr01
betemwi01	1981	11	2	D.R.	Distrito Nacional	Santo Domingo							Wilson	Betemit	Wilson	220	74	B	R	2001-09-18	2013-09-12	betew001	betemwi01
bethach01	1991	9	2	Panama	Panama	Panama							Christian	Bethancourt	Christian Gabriel	213	74	R	R	2013-09-29	2017-04-22	bethc001	bethach01
bethebi01	1942	1	1	USA	TX	Houston							Bill	Bethea	William Lamar	175	72	R	R	1964-09-13	1964-09-29	bethb101	bethebi01
bethkji01	1946	11	5	USA	NE	Falls City							Jim	Bethke	James Charles	185	75	R	R	1965-04-12	1965-09-11	bethj101	bethkji01
betteje01	1960	12	10	USA	CA	Lompoc							Jeff	Bettendorf	Jeffrey Allen	180	75	R	R	1984-04-08	1984-04-25	bettj001	betteje01
bettela01	1905	9	22	USA	CA	Newark	1978	9	15	USA	LA	New Orleans	Larry	Bettencourt	Lawrence Joseph	195	71	R	R	1928-06-02	1932-09-17	bettl101	bettela01
bettich01	1989	4	26	USA	TX	Lubbock							Chad	Bettis	Chad Robert	200	73	R	R	2013-08-01	2016-09-30	bettc001	bettich01
bettsha01	1881	6	19	USA	OH	Alliance	1946	5	22	USA	TX	San Antonio	Harry	Betts	Harold Matthew	200	70	R	R	1903-09-22	1913-05-13	betth102	bettsha01
bettshu01	1897	2	18	USA	DE	Millsboro	1987	6	13	USA	DE	Millsboro	Huck	Betts	Walter McKinley	170	71	R	R	1920-04-26	1935-09-27	betth101	bettshu01
bettsmo01	1992	10	7	USA	TN	Nashville							Mookie	Betts	Markus Lynn	180	69	R	R	2014-06-29	2017-06-16	bettm001	bettsmo01
betzebr01	1894	12	6	USA	OH	Chattanooga	1965	2	7	USA	FL	West Hollywood	Bruno	Betzel	Christian Frederick Albert John Henry David	158	69	R	R	1914-09-03	1918-09-02	betzb101	betzebr01
bevacku01	1947	1	23	USA	FL	Miami Beach							Kurt	Bevacqua	Kurt Anthony	180	72	R	R	1971-06-22	1985-10-06	bevak001	bevacku01
bevanha01	1930	11	15	USA	LA	New Orleans	1968	10	5	USA	LA	New Orleans	Hal	Bevan	Harold Joseph	198	74	R	R	1952-04-24	1961-05-13	bevah101	bevanha01
bevenbi01	1916	10	21	USA	OR	Hubbard	1991	10	26	USA	OR	Salem	Bill	Bevens	Floyd Clifford	210	75	R	R	1944-05-12	1947-09-27	beveb101	bevenbi01
beverja01	1973	11	27	USA	OH	Ashtabula							Jason	Beverlin	Jason Robert	220	77	L	R	2002-07-29	2002-09-28	bevej001	beverja01
bevilbe01	1877	8	28	USA	CA	Colusa	1937	1	5	USA	CA	Yountville	Ben	Beville	Clarence Benjamin	190	69	R	R	1901-05-24	1901-06-02	bevib101	bevilbe01
bevilbr01	1971	9	5	USA	TX	Houston							Brian	Bevil	Brian Scott	190	75	R	R	1996-06-17	1998-09-26	bevib001	bevilbr01
bevillo01	1922	11	27	USA	IL	Nelson	1973	2	1	USA	IL	Dixon	Lou	Bevil	Louis Eugene	190	71	B	R	1942-09-02	1942-09-13	bevil101	bevillo01
bevilmo01	1875	2	24	USA	IN	Dublin	1955	1	24	USA	MI	Grand Rapids	Monte	Beville	Henry Monte	180	71	L	R	1903-04-24	1904-10-08	bevim101	bevilmo01
bevinte99	1956	7	7	USA	OH	Akron							Terry	Bevington	Terry Paul	190	74	R	R			bevit801	bevinte99
bezdehu99	1883	4	1	Czech Republic		Prague	1952	9	19	USA	NJ	Atlantic City	Hugo	Bezdek	Hugo Francis							bezdh801	bezdehu99
biagijo01	1990	5	29	USA	CA	Redwood City							Joe	Biagini	Joseph Carlo	240	77	R	R	2016-04-08	2017-06-16	biagj001	biagijo01
biancbu01	1960	2	2	USA	CA	Greenbrae							Buddy	Biancalana	Roland Americo	160	71	B	R	1982-09-12	1987-10-04	bianb001	biancbu01
biancje01	1986	10	5	USA	PA	Lancaster							Jeff	Bianchi	Jeffrey Thomas	185	71	R	R	2012-07-13	2015-06-14	bianj001	biancje01
biancto01	1952	12	16	USA	NY	Rockville Centre							Tommy	Bianco	Thomas Anthony	190	71	B	R	1975-05-28	1975-09-27	biant101	biancto01
biasaha01	1922	1	14	Italy		Beano	1996	4	20	USA	MI	Dearborn	Hank	Biasatti	Henry Arcado	175	71	L	L	1949-04-23	1949-10-02	biash101	biasaha01
bibbyji01	1944	10	29	USA	NC	Franklinton	2010	2	16	USA	VA	Lynchburg	Jim	Bibby	James Blair	235	77	R	R	1972-09-04	1984-05-26	bibbj001	bibbyji01
bibenau01	1985	4	29	USA	OR	Salem							Austin	Bibens-Dirkx	Austin M.	210	73	R	R	2017-05-17	2017-06-11		bibenau01
bicheda01	1963	11	18	USA	FL	West Palm Beach							Dante	Bichette	Alphonse Dante	215	75	R	R	1988-09-05	2001-10-06	bichd001	bicheda01
bicke99	1848	8		USA	DC	Washington	1916	2	9	USA	DC	Washington	John	Bickerton	John A.							bicku801	bickejo99
bickfve01	1920	8	17	USA	KY	Hellier	1960	5	6	USA	VA	Richmond	Vern	Bickford	Vernon Edgell	180	72	R	R	1948-04-24	1954-04-24	bickv101	bickfve01
bickhda01	1864	10	31	USA	OH	Dayton	1951	3	3	USA	OH	Dayton	Dan	Bickham	Daniel Denison	160	70	R	R	1886-08-13	1886-08-13	bickd101	bickhda01
bicknch01	1928	7	27	USA	NJ	Plainfield	2013	11	24	USA	MT	Livingston	Charlie	Bicknell	Charles Stephen	170	71	R	R	1948-04-22	1949-09-18	bickc101	bicknch01
biddlro01	1976	5	21	USA	NV	Las Vegas							Rocky	Biddle	Lee Francis	230	75	R	R	2000-08-10	2004-09-06	biddr001	biddlro01
bielaos01	1847	3	21	USA	DC	Washington	1911	11	8	USA	DC	Washington	Oscar	Bielaski	Oscar	170	70	R	R	1872-04-24	1876-08-21	bielo101	bielaos01
bielemi01	1959	7	31	USA	MD	Baltimore							Mike	Bielecki	Michael Joseph	195	75	R	R	1984-09-14	1997-08-16	bielm001	bielemi01
biemiha01	1897	10	9	USA	MD	Baltimore	1965	5	25	USA	FL	Orlando	Harry	Biemiller	Harry Lee	171	73	R	R	1920-08-26	1925-08-26	biemh101	biemiha01
bierblo01	1865	9	28	USA	PA	Erie	1926	1	31	USA	PA	Erie	Lou	Bierbauer	Louis W.	140	68	L	R	1886-04-17	1898-04-30	bierl101	bierblo01
bierbni01	1978	5	16	USA	CA	Tarzana							Nick	Bierbrodt	Nicholas Raymond	215	77	L	L	2001-06-07	2004-07-06	biern001	bierbni01
bierdra01	1984	3	14	D.R.	Distrito Nacional	Santo Domingo							Randor	Bierd	Randor	190	76	R	R	2008-04-02	2008-09-28	bierr001	bierdra01
biermch01	1845			USA	NJ	Hoboken	1879	8	4	USA	NJ	Hoboken	Charles	Bierman	Charles S.	180	72			1871-06-21	1871-06-21	bierc101	biermch01
biesest01	1967	8	4	USA	MO	Perryville							Steve	Bieser	Steven Ray	170	70	L	R	1997-04-01	1998-07-28	biess001	biesest01
bigbeca01	1895	3	31	USA	OR	Lebanon	1964	10	17	USA	OR	Portland	Carson	Bigbee	Carson Lee	157	69	L	R	1916-08-24	1926-08-07	bigbc101	bigbeca01
bigbely01	1893	8	22	USA	OR	Waterloo	1942	8	3	USA	OR	Portland	Lyle	Bigbee	Lyle Randolph	180	72	L	R	1920-04-15	1921-09-15	bigbl101	bigbely01
bigbila01	1977	11	4	USA	IN	Hobart							Larry	Bigbie	Larry Robert	190	76	L	R	2001-06-23	2006-06-04	bigbl001	bigbila01
bigelel01	1897	10	13	USA	FL	Tarpon Springs	1933	8	13	USA	FL	Tampa	Elliot	Bigelow	Elliot Allardice	185	71	L	L	1929-04-18	1929-10-06	bigee101	bigelel01
biggicr01	1965	12	14	USA	NY	Smithtown							Craig	Biggio	Craig Alan	185	71	R	R	1988-06-26	2007-09-30	biggc001	biggicr01
biggsch01	1906	9	15	USA	IN	French Lick	1954	5	24	USA	IN	French Lick	Charlie	Biggs	Charles Orval	185	73	R	R	1932-09-03	1932-09-24	biggc101	biggsch01
biglepe01	1892	12	13	USA	OH	Bradford	1975	4	1	USA	MI	Coldwater	Ivan	Bigler	Ivan Edward	150	69	R	R	1917-05-06	1917-05-06	bigli101	biglepe01
bignege01	1858	7	18	USA	MA	Taunton	1925	1	16	USA	RI	Providence	George	Bignell	George William	160	69			1884-09-27	1884-10-05	bigng101	bignege01
biittla01	1945	7	27	USA	IA	Pocahontas							Larry	Biittner	Lawrence David	205	74	L	L	1970-07-17	1983-09-29	biitl101	biittla01
bilarda01	1959	5	26	USA	CA	Santa Cruz							Dann	Bilardello	Dann James	185	72	R	R	1983-04-11	1992-10-04	bilad001	bilarda01
bilbrji01	1924	4	20	USA	TN	Rickman	1985	12	26	USA	OH	Toledo	Jim	Bilbrey	James Melvin	205	74	R	R	1949-05-17	1949-05-17	bilbj101	bilbrji01
bildiem01	1912	9	16	USA	IN	Diamond	1946	9	16	USA	IN	Hartford City	Emil	Bildilli	Emil	170	70	R	L	1937-08-24	1941-05-01	bilde101	bildiem01
bilkost01	1928	11	13	USA	PA	Nanticoke	1978	3	7	USA	PA	Wilkes-Barre	Steve	Bilko	Stephen Thomas	230	73	R	R	1949-09-22	1962-08-23	bilks101	bilkost01
billibr01	1975	4	19	USA	CA	Downey							Brent	Billingsley	Brett Aaron	200	74	L	L	1999-05-20	1999-10-03	billb001	billibr01
billibr02	1985	11	18	USA	CA	San Diego							Bruce	Billings	Bruce	205	72	R	R	2011-05-27	2014-04-25	billb002	billibr02
billich01	1984	7	29	USA	OH	Defiance							Chad	Billingsley	Chad Ryan	240	73	R	R	2006-06-15	2015-07-18	billc001	billich01
billidi01	1942	12	4	USA	MI	Detroit							Dick	Billings	Richard Arlin	195	73	R	R	1968-09-11	1975-06-27	billd101	billidi01
billiha01	1883	11	11	USA	IN	Monroe	1923	6	3	USA	OH	Wooster	Harry	Billiard	Harry Pree	190	72	R	R	1908-07-31	1915-10-03	billh101	billiha01
billija01	1943	2	21	USA	FL	Orlando							Jack	Billingham	John Eugene	195	76	R	R	1968-04-11	1980-06-20	billj101	billija01
billijo01	1891	11	30	USA	KS	Grantville	1981	12	30	USA	CA	Santa Monica	Josh	Billings	John Augustus	165	71	R	R	1913-09-09	1923-08-24	billj103	billijo01
billijo02	1907	9	27	USA	NY	New York	1983	12	26	USA	CA	Greenbrae	Josh	Billings	Haskell Clark	180	71	R	R	1927-08-17	1929-08-05	billj102	billijo02
binksge01	1914	7	11	USA	IL	Chicago	2010	11	13	USA	TN	Woodbury	George	Binks	George Alvin	175	72	L	L	1944-09-23	1948-07-03	binkg101	binksge01
birasst01	1922	2	26	USA	IL	East St. Louis	1965	4	21	USA	MO	St. Louis	Steve	Biras	Stephen Alexander	185	71	R	R	1944-09-15	1944-09-26	biras101	birasst01
birchju01	1855	9	12	USA	PA	Philadelphia	1887	12	22	USA	PA	Philadelphia	Jud	Birchall	Adoniram Judson					1882-05-02	1884-10-10	bircj101	birchju01
birddo01	1950	3	5	USA	CA	Corona							Doug	Bird	James Douglas	180	76	R	R	1973-04-29	1983-09-10	birdd101	birddo01
birdfr01	1869	3	10	USA	MA	Spencer	1958	5	20	USA	MA	Worcester	Frank	Bird	Frank Zephrin	195	70	R	R	1892-04-16	1892-06-10	birdf101	birdfr01
birdge01	1850	6	23	USA	IL	Stillman Valley	1940	11	9	USA	IL	Rockford	George	Bird	George Raymond	150	69	R	R	1871-05-06	1871-09-15	birdg101	birdge01
birdgr01	1992	11	9	USA	CO	Aurora							Greg	Bird	Gregory Paul	220	76	L	R	2015-08-13	2017-05-01	birdg001	birdgr01
birdre01	1890	4	25	USA	TX	Stephenville	1972	3	23	USA	AR	Murfreesboro	Red	Bird	James Edward	170	71	L	L	1921-09-17	1921-09-17	birdr101	birdre01
birdsda01	1838	7	16	USA	NY	New York	1896	12	30	USA	MA	Boston	Dave	Birdsall	David Solomon	126	69			1871-05-05	1873-05-17	birdd102	birdsda01
birkbmi01	1961	3	10	USA	OH	Orrville							Mike	Birkbeck	Michael Lawrence	190	73	R	R	1986-08-17	1995-06-11	birkm001	birkbmi01
birkiku01	1980	8	11	USA	CA	West Hills							Kurt	Birkins	Kurt Daniel	188	74	L	L	2006-05-04	2008-05-04	birkk001	birkiku01
birkora01	1908	11	5	USA	OH	Cincinnati	1971	3	16	USA	OH	Cincinnati	Ralph	Birkofer	Ralph Joseph	213	71	L	L	1933-04-25	1937-07-11	birkr101	birkora01
birmijo01	1884	12	3	USA	NY	Elmira	1946	4	24	Mexico	Tamaulipas	Tampico	Joe	Birmingham	Joseph Leo	185	70	R	R	1906-09-12	1914-07-25	birmj101	birmijo01
birreba01	1929	7	4	USA	NY	Buffalo	2013	11	19	USA	NY	Clarence	Babe	Birrer	Werner Joseph	195	72	R	R	1955-06-05	1958-09-24	birrb101	birreba01
birtsti01	1960	9	5	USA	MI	Pontiac							Tim	Birtsas	Timothy Dean	240	79	L	L	1985-05-03	1990-10-03	birtt001	birtsti01
biscafr01	1920	3	13	USA	IL	Mount Olive	1959	5	22	USA	MO	St. Louis	Frank	Biscan	Frank Stephen	190	71	L	L	1942-05-03	1948-09-30	biscf101	biscafr01
bischjo01	1894	10	28	USA	IL	Edwardsville	1981	12	28	USA	IL	Granite City	John	Bischoff	John George	165	67	R	R	1925-04-18	1926-09-22	biscj101	bischjo01
bisenjo01	1982	9	18	USA	IA	Sioux City							Joe	Bisenius	Joseph Richard	210	76	R	R	2007-04-05	2010-09-27	bisej001	bisenjo01
bishobi01	1864	12	27	USA	PA	Adamsburg	1932	12	15	USA	PA	Allgeheny County	Bill	Bishop	William Robinson	187	68	R	R	1886-09-13	1889-09-19	bishb101	bishobi01
bishobi02	1900	10	22	USA	PA	Houtzdale	1956	2	14	USA	MO	St. Joseph	Bill	Bishop	William Henry	170	68	L	L	1921-09-15	1921-09-24	bishb102	bishobi02
bishoch01	1924	1	1	USA	GA	Atlanta	1993	7	5	USA	GA	Lawrenceville	Charlie	Bishop	Charles Tuller	195	74	R	R	1952-08-22	1955-05-07	bishc101	bishoch01
bishofr01	1856	9	21	USA	IL	Belvidere	1929	6	18	USA	IL	Chicago	Frank	Bishop	Frank H.					1884-05-27	1884-05-30	bishf101	bishofr01
bishoji01	1898	1	28	USA	MO	Montgomery City	1973	9	20	USA	MO	Montgomery City	Jim	Bishop	James Morton	195	72	R	R	1923-04-26	1924-09-24	bishj101	bishoji01
bisholl01	1890	4	25	USA	KS	Conway Springs	1968	6	18	USA	KS	Wichita	Lloyd	Bishop	Lloyd Clifton	180	72	R	R	1914-09-05	1914-09-14	bishl101	bisholl01
bishoma01	1899	9	5	USA	PA	Waynesboro	1962	2	25	USA	PA	Waynesboro	Max	Bishop	Max Frederick	165	68	L	R	1924-04-15	1935-09-21	bishm102	bishoma01
bishomi01	1958	11	5	USA	CA	Santa Maria	2005	2	8	USA	CA	Bakersfield	Mike	Bishop	Michael David	188	74	R	R	1983-04-16	1983-04-24	bishm101	bishomi01
bislari01	1890	2	17	USA	NY	New York	1973	1	11	Austria	Salzburg	Salzburg	Rivington	Bisland	Rivington Martin	155	69	R	R	1912-09-13	1914-06-12	bislr101	bislari01
bissode01	1899	9	6	USA	ME	Winthrop	1972	6	9	USA	ME	Augusta	Del	Bissonette	Delphia Louis	180	71	L	L	1928-04-11	1933-06-04	bissd101	bissode01
bithohi01	1916	3	18	P.R.		Santurce	1951	12	29	Mexico	Tamaulipas	Ciudad Victoria	Hi	Bithorn	Hiram Gabriel	200	73	R	R	1942-04-15	1947-05-04	bithh101	bithohi01
bitkejo01	1964	2	12	USA	CA	Glendale							Joe	Bitker	Joseph Anthony	175	73	R	R	1990-07-31	1991-06-19	bitkj001	bitkejo01
bittije01	1962	4	13	USA	NJ	Jersey City							Jeff	Bittiger	Jeffrey Scott	175	70	R	R	1986-09-02	1989-05-30	bittj001	bittije01
bittmre01	1862	7	22	USA	OH	Cincinnati	1929	11	8	USA	OH	Cincinnati	Red	Bittmann	Henry Peter	180	69			1889-10-10	1889-10-14	bittr101	bittmre01
bivinji01	1909	12	11	USA	MS	Jackson	1982	11	7	USA	CO	Pueblo	Jim	Bivin	James Nathaniel	155	72	R	R	1935-04-16	1935-09-29	bivij101	bivinji01
bixlebr01	1982	10	22	USA	OH	Sandusky							Brian	Bixler	Brian Joseph	195	73	R	R	2008-04-06	2012-07-28	bixlb001	bixlebr01
bjorkge01	1956	8	26	USA	CA	Ontario							George	Bjorkman	George Anton	190	74	R	R	1983-07-10	1983-10-02	bjorg101	bjorkge01
blachty01	1990	10	20	USA	CO	Denver							Ty	Blach	Tyson Michael	200	74	R	L	2016-09-05	2017-06-16	blact002	blachty01
blackbi01	1899	8	12	USA	PA	Philadelphia	1968	1	14	USA	PA	Philadelphia	Bill	Black	John William	168	71	L	R	1924-05-04	1924-05-23	blacb103	blackbi01
blackbo01	1862	12	10	USA	OH	Cincinnati	1933	3	21	USA	IA	Sioux City	Bob	Black	Robert Benjamin	155	65		R	1884-08-19	1884-10-19	blacb102	blackbo01
blackbu01	1932	7	9	USA	MO	St. Louis	2005	10	2	USA	MO	St. Louis	Bud	Black	William Carroll	197	75	R	R	1952-09-13	1956-05-12	blacb101	blackbu01
blackbu02	1957	6	30	USA	CA	San Mateo							Buddy	Black	Harry Ralston	180	74	L	L	1981-09-05	1995-07-09	blacb001	blackbu02
blackch01	1895	1	6	USA	IL	Chicago	1984	3	9	USA	FL	New Port Richey	Charlie	Blackburn	Foster Edwin	165	73	R	R	1915-04-17	1921-09-02	blacc101	blackch01
blackch02	1986	7	1	USA	TX	Dallas							Charlie	Blackmon	Charles Cobb	210	75	L	L	2011-06-07	2017-06-16	blacc001	blackch02
blackda01	1893	11	8	USA	IL	Chicago	1959	6	17	USA	IL	Chicago	Dave	Black	David	175	74	L	L	1914-05-02	1923-05-10	blacd102	blackda01
blackdo01	1916	7	20	USA	IA	Salix	1959	4	21	USA	OH	Cuyahoga Falls	Don	Black	Donald Paul	185	72	R	R	1943-04-24	1948-09-13	blacd101	blackdo01
blackea01	1892	11	1	USA	OH	Leesville	1966	8	3	USA	OH	Mansfield	Earl	Blackburn	Earl Stuart	180	71	R	R	1912-09-17	1917-07-02	blace101	blackea01
blacket01	1940	7	24	USA	OH	Cincinnati							Ethan	Blackaby	Ethan Allen	190	71	L	L	1962-09-06	1964-10-04	blace103	blacket01
blackew01	1922	10	23	USA	CA	Fresno	1996	10	29	USA	NC	Hendersonville	Ewell	Blackwell	Ewell	195	78	R	R	1942-04-21	1955-04-18	blace102	blackew01
blackfr01	1891	9	7	USA	KY	Bowling Green	1975	12	8	USA	KY	Morgantown	Fred	Blackwell	Frederick William	160	70	L	R	1917-09-25	1919-09-28	blacf101	blackfr01
blackge01	1869	9	21	USA	MO	Ozark							George	Blackburn	George W.	184	71		R	1897-07-06	1897-07-24	blacg102	blackge01
blackge02	1903	11	18	USA	OK	Luther	1987	3	30	USA	TX	Wichita Falls	George	Blackerby	George Franklin	176	73	R	R	1928-08-10	1928-09-29	blacg101	blackge02
blackji01	1924	6	19	USA	KY	Warsaw	1969	10	26	USA	OH	Cincinnati	Jim	Blackburn	James Ray	175	76	R	R	1948-07-24	1951-05-05	blacj102	blackji01
blackjo01	1890	2	23	USA	KY	Covington	1962	3	20	USA	NJ	Rutherford	John	Black	John Falconor	185	73	R	R	1911-06-20	1911-09-12	blacj101	blackjo01
blackjo02	1924	2	8	USA	NJ	Plainfield	2002	5	17	USA	AZ	Scottsdale	Joe	Black	Joseph	220	74	R	R	1952-05-01	1957-09-11	blacj103	blackjo02
blackle01	1886	10	23	USA	PA	Clifton Heights	1968	2	29	USA	NJ	Riverside	Lena	Blackburne	Russell Aubrey	160	71	R	R	1910-04-14	1929-06-05	blacl101	blackle01
blackni01	1982	2	24	USA	OK	Ada							Nick	Blackburn	Robert Nicholas	240	76	R	R	2007-09-03	2012-08-17	blacn001	blackni01
blackro01	1935	4	23	USA	NC	Mount Airy	1998	4	29	USA	NC	Morganton	Ron	Blackburn	Ronald Hamilton	160	72	R	R	1958-04-15	1959-07-28	blacr101	blackro01
blackti01	1952	8	19	USA	CA	San Diego							Tim	Blackwell	Timothy P.	170	71	B	R	1974-07-03	1983-05-17	blact101	blackti01
blacktr01	1982	11	4	Australia	Victoria	Melbourne							Travis	Blackley	Travis Jarred	190	75	L	L	2004-07-01	2013-09-13	blact001	blacktr01
blackvi01	1988	5	23	USA	TX	Amarillo							Vic	Black	Victor Laurence	210	76	R	R	2013-07-25	2014-09-13	blacv001	blackvi01
bladera01	1896	8	6	USA	IL	Mount Vernon	1979	5	18	USA	IL	Lincoln	Ray	Blades	Francis Raymond	163	67	R	R	1922-08-19	1932-09-25	bladr102	bladera01
bladtri01	1946	12	9	USA	CA	Santa Cruz							Rick	Bladt	Richard Alan	160	73	R	R	1969-06-15	1975-09-28	bladr101	bladtri01
blaehge01	1904	1	26	USA	CA	Orange	1947	12	29	USA	CA	Garden Grove	George	Blaeholder	George Franklin	175	71	R	R	1925-04-20	1936-09-22	blaeg101	blaehge01
blaemra01	1911	2	8	USA	IN	Gary	1975	12	23	USA	IL	Champaign	Rae	Blaemire	Rae Bertrum	178	72	R	R	1941-09-13	1941-09-23	blaer101	blaemra01
blairaa01	1992	5	26	USA	NV	Las Vegas							Aaron	Blair	Aaron Daniel	250	76	R	R	2016-04-24	2016-10-01	blaia001	blairaa01
blairbi01	1863	9	17	USA	PA	Pittsburgh	1890	2	22	USA	PA	Pittsburgh	Bill	Blair	William Ellsworth	172	68	L	L	1888-07-19	1888-09-23	blaib101	blairbi01
blairbu01	1910	9	10	USA	MS	Columbia	1996	6	7	USA	LA	Monroe	Buddy	Blair	Louis Nathan	186	72	L	R	1942-04-14	1942-09-20	blaib102	blairbu01
blairca01	1989	10	18	USA	TX	Carrollton							Carson	Blair	Carson Reynolds	210	74	R	R	2015-09-06	2015-09-24	blaic001	blairca01
blairde01	1954	6	5	USA	OH	Middletown							Dennis	Blair	Dennis Herman	182	77	R	R	1974-05-26	1980-07-04	blaid101	blairde01
blairfo01	1900	7	13	USA	OK	Enterprise	1982	7	1	USA	TX	Texarkana	Footsie	Blair	Clarence Vick	180	73	L	R	1929-04-28	1931-09-27	blaif101	blairfo01
blairpa01	1944	2	1	USA	OK	Cushing	2013	12	26	USA	MD	Baltimore	Paul	Blair	Paul L. D.	168	72	R	R	1964-09-09	1980-06-20	blaip101	blairpa01
blairwa01	1883	10	13	USA	PA	Landrus	1948	8	20	USA	PA	Lewisburg	Walter	Blair	Walter Allen	185	72	R	R	1907-09-17	1915-09-29	blaiw101	blairwa01
blairwi01	1965	12	18	USA	KY	Paintsville							Willie	Blair	William Allen	185	73	R	R	1990-04-11	2001-07-26	blaiw001	blairwi01
blaisdi01	1862	6	18	USA	MA	Bradford	1886	8	20	USA	MA	Malden	Dick	Blaisdell	Howard Carleton					1884-07-09	1884-07-14	blaid102	blaisdi01
blakeca01	1973	8	23	USA	IA	Des Moines							Casey	Blake	William Casey	205	74	R	R	1999-08-14	2011-08-31	blakc001	blakeca01
blakeed01	1925	12	23	USA	IL	East St. Louis	2009	4	15	USA	IL	Swansea	Ed	Blake	Edward James	175	71	R	R	1951-05-01	1957-04-28	blake101	blakeed01
blakeha01	1874	6	16	USA	OH	Portsmouth	1919	10	14	USA	IL	Chicago	Harry	Blake	Harry Cooper	165	67	R	R	1894-07-07	1899-10-09	blakh101	blakeha01
blakeli01	1912	2	12	USA	CA	Oakland	1976	9	28	USA	CA	Oakland	Linc	Blakely	Lincoln Howard	180	72	R	R	1934-04-29	1934-06-27	blakl101	blakeli01
blakesh01	1899	9	17	USA	WV	Ansted	1982	10	31	USA	WV	Beckley	Sheriff	Blake	John Frederick	180	72	B	R	1920-06-29	1937-09-26	blaks101	blakesh01
blakibo01	1855	10	2	USA	CA	San Francisco	1918	12	26	USA	CA	San Francisco	Bob	Blakiston	John Robert	180	68			1882-05-02	1884-10-15	blakb101	blakibo01
blaloha01	1980	11	21	USA	CA	San Diego							Hank	Blalock	Hank Joe	192	73	L	R	2002-04-01	2010-06-27	blalh001	blaloha01
blancal01	1909	9	21	USA	MA	Somerville	1997	4	2	USA	MA	Melrose	Al	Blanche	Prosper Albert	178	72	R	R	1935-08-23	1936-06-19	blana101	blancal01
blancan01	1984	4	11	Venezuela	Carabobo	Urama							Andres	Blanco	Andres Eloy	195	70	B	R	2004-04-17	2017-06-16	blana001	blancan01
blancda01	1941	12	11	Venezuela	Miranda	Curiepe							Damaso	Blanco	Damaso	165	70	R	R	1972-05-26	1974-06-02	bland101	blancda01
blancgi01	1945	12	15	USA	AZ	Phoenix							Gil	Blanco	Gilbert Henry	205	77	L	L	1965-04-24	1966-09-22	blang101	blancgi01
blancgr01	1983	12	24	Venezuela	Distrito Federal	Caracas							Gregor	Blanco	Gregor Miguel	175	71	L	L	2008-03-30	2017-06-16	blang001	blancgr01
blanche01	1971	8	29	Venezuela	Distrito Federal	Caracas							Henry	Blanco	Henry Ramon	220	71	R	R	1997-07-25	2013-09-23	blanh001	blanche01
blancjo01	1933	2	26	USA	MN	Minneapolis	2009	3	25	USA	MN	Robbinsdale	Johnny	Blanchard	John Edwin	193	73	L	R	1955-09-25	1965-09-27	blanj101	blancjo01
blancos01	1945	9	8	Venezuela	Distrito Federal	Caracas							Ossie	Blanco	Oswaldo Carlos	185	72	R	R	1970-05-26	1974-06-09	blano101	blancos01
blancto01	1981	11	10	D.R.	San Juan	San Juan de la Maguana							Tony	Blanco	Tony Hemiphere	200	74	R	R	2005-04-04	2005-09-24	blant001	blancto01
blandfr01	1888	2	8	USA	CA	Redlands	1950	7	17	USA	VA	Salem	Fred	Blanding	Frederick James	185	72	R	R	1910-09-15	1914-09-30	blanf102	blandfr01
blandna01	1974	12	27	USA	AL	Birmingham							Nate	Bland	Nathan Garrett	190	77	L	L	2003-05-05	2003-06-27	blann001	blandna01
blankcl01	1880	4	10	USA	GA	Columbus	1956	4	26	USA	CA	Oakland	Cliff	Blankenship	Clifford Douglas	165	70	R	R	1905-04-17	1909-08-18	blanc103	blankcl01
blankco01	1892	10	18	USA	MO	St. Louis	1961	12	8	USA	MO	St. Louis	Coonie	Blank	Frank Ignatz	165	71	R	R	1909-08-15	1909-08-15	blanc102	blankco01
blankfr01	1874	6	18	USA	MO	De Soto	1936	2	5	USA	MO	St. Louis	Fred	Blank	Frederick August	175	72	L	L	1894-06-20	1894-06-20	blanf101	blankfr01
blankho01	1902	8	4	USA	TX	Bonham	1974	6	21	USA	TX	Longview	Homer	Blankenship	Homer	185	72	R	R	1922-09-06	1928-09-27	blanh101	blankho01
blankke01	1963	1	26	USA	CA	Anaheim							Kevin	Blankenship	Kevin DeWayne	180	72	R	R	1988-09-20	1990-06-12	blank001	blankke01
blankky01	1986	9	11	USA	PA	Souderton							Kyle	Blanks	Kyle Nathaniel	265	78	R	R	2009-06-19	2015-06-16	blank002	blankky01
blankla01	1950	1	28	USA	TX	Del Rio							Larvell	Blanks	Larvell	167	68	R	R	1972-07-19	1980-08-03	blanl101	blankla01
blankla02	1963	12	6	USA	OR	Portland							Lance	Blankenship	Lance Robert	190	72	R	R	1988-09-04	1993-08-15	blanl001	blankla02
blankma01	1976	4	5	USA	TX	Texarkana							Matt	Blank	Clarence Matthew	200	74	L	L	2000-04-03	2001-06-21	blanm001	blankma01
blankte01	1901	5	10	USA	TX	Bonham	1945	1	14	USA	OK	Atoka	Ted	Blankenship	Theodore	170	73	R	R	1922-07-02	1930-05-24	blant101	blankte01
blantcy01	1908	7	6	USA	OK	Waurika	1945	9	13	USA	OK	Norman	Cy	Blanton	Darrell Elijah	180	71	L	R	1934-09-23	1942-05-06	blanc101	blantcy01
blantjo01	1980	12	11	USA	KY	Bowling Green							Joe	Blanton	Joseph Matthew	225	75	R	R	2004-09-21	2017-06-15	blanj001	blantjo01
blashja01	1989	7	4	V.I.	St. Thomas	St. Thomas							Jabari	Blash	Jabari Jerell	235	77	R	R	2016-04-04	2017-05-08	blasj001	blashja01
blasido01	1932	3	16	USA	MS	Corinth	2005	4	13	USA	AZ	Fountain Hills	Don	Blasingame	Don Lee	160	70	L	R	1955-09-20	1966-08-27	blasd101	blasido01
blasiwa01	1943	11	22	USA	NM	Deming							Wade	Blasingame	Wade Allen	185	73	L	L	1963-09-17	1972-09-22	blasw101	blasiwa01
blassst01	1942	4	18	USA	CT	Canaan							Steve	Blass	Stephen Robert	165	72	R	R	1964-05-10	1974-04-17	blass101	blassst01
blatest01	1944	3	20	USA	CO	Denver							Steve	Blateric	Stephen Lawrence	200	75	R	R	1971-09-17	1975-04-21	blats101	blatest01
blatnjo01	1921	3	10	USA	OH	Bridgeport	2004	1	21	USA	OH	Lansing	Johnny	Blatnik	John Louis	195	72	R	R	1948-04-21	1950-05-14	blatj101	blatnjo01
blattbu01	1920	2	8	USA	MO	St. Louis	2009	9	5	USA	MO	Chesterfield	Buddy	Blattner	Robert Garnett	180	72	R	R	1942-04-18	1949-10-02	blatb101	blattbu01
blausje01	1965	11	8	USA	CA	Los Gatos							Jeff	Blauser	Jeffrey Michael	170	72	R	R	1987-07-05	1999-10-03	blauj001	blausje01
blauvhe01	1867	12		USA	NY	New York	1929	5	25	USA	NY	Trumansburg	Harvey	Blauvelt	Harvey King					1890-06-22	1890-06-29	blauh101	blauvhe01
blaylbo01	1935	6	28	USA	TN	Chattanooga							Bob	Blaylock	Robert Edward	185	73	R	R	1956-07-22	1959-09-20	blayb101	blaylbo01
blaylga01	1931	10	11	USA	MO	Clarkton							Gary	Blaylock	Gary Nelson	196	72	R	R	1959-04-10	1959-09-27	blayg101	blaylga01
blaylma01	1929	9	30	USA	AR	Fort Smith	1993	10	23	USA	AR	Conway	Marv	Blaylock	Marvin Edward	175	73	L	L	1950-09-26	1957-09-28	blaym101	blaylma01
blazemi01	1989	3	16	USA	NV	Las Vegas							Michael	Blazek	Michael Robert	205	72	R	R	2013-06-22	2016-09-24	blazm001	blazemi01
blaziro01	1971	7	30	USA	PA	Altoona							Ron	Blazier	Ronald Patrick	215	78	R	R	1996-05-31	1997-09-28	blazr001	blaziro01
blefacu01	1943	7	5	USA	NY	Brooklyn	2001	1	28	USA	FL	Pompano Beach	Curt	Blefary	Curtis Leroy	195	74	L	R	1965-04-14	1972-10-04	blefc101	blefacu01
bleieri01	1987	4	16	USA	FL	Davie							Richard	Bleier	Richard Sidney	215	75	L	L	2016-05-30	2017-06-13	bleir001	bleieri01
blemkra01	1937	8	9	USA	IN	Huntingburg	1994	2	15	USA	IN	Evansville	Ray	Blemker	Raymond	190	71	R	L	1960-07-03	1960-07-03	blemr101	blemkra01
blessik01	1949	9	30	USA	MI	Detroit							Ike	Blessitt	Isaiah	185	71	R	R	1972-09-07	1972-10-04	blesi101	blessik01
blethcl01	1893	7	11	USA	ME	Dover-Foxcroft	1973	4	11	USA	MD	Frederick	Clarence	Blethen	Clarence Waldo	165	71	L	R	1923-09-17	1929-09-26	bletc101	blethcl01
blevije01	1983	9	6	USA	TN	Johnson City							Jerry	Blevins	Jerry Richard	190	78	L	L	2007-09-16	2017-06-14	blevj001	blevije01
blewebo01	1877	6	28	USA	WI	Fond du Lac	1958	3	17	USA	WA	Sedro-Woolley	Bob	Blewett	Robert Lawrence	170	71	L	L	1902-06-17	1902-07-14	blewb101	blewebo01
blighne01	1864	6	30	USA	NY	Brooklyn	1892	4	18	USA	NY	Brooklyn	Ned	Bligh	Edwin Forrest	172	71	R	R	1886-06-26	1890-10-14	blign101	blighne01
blissel01	1875	3	9	USA	PA	Penfield	1962	3	18	USA	PA	Bradford	Elmer	Bliss	Elmer Ward	180	72	L	R	1903-09-28	1904-05-11	blise101	blissel01
blissfr01	1852	12	10	USA	IL	Chicago	1929	1	9	USA	TN	Nashville	Frank	Bliss	Frank Eugene					1878-06-20	1878-06-22	blisf101	blissfr01
blissja01	1882	1	9	USA	WA	Vancouver	1968	10	23	USA	CA	Temple City	Jack	Bliss	John Joseph Albert	185	69	R	R	1908-05-10	1912-09-30	blisj101	blissja01
blockbr01	1885	3	13	USA	WI	Wisconsin Rapids	1937	8	6	USA	WI	South Milwaukee	Bruno	Block	James John	185	69	R	R	1907-08-05	1914-10-04	blocb101	blockbr01
blockcy01	1919	5	4	USA	NY	Brooklyn	2004	9	22	USA	NY	Manhasset	Cy	Block	Seymour	180	72	R	R	1942-09-07	1946-09-23	blocc101	blockcy01
blockte01	1959	8	18	USA	SC	Columbia							Terry	Blocker	Terry Fennell	195	74	L	L	1985-04-11	1989-06-11	bloct001	blockte01
bloggwe01	1855			USA	VA	Norfolk	1897	3	10	USA	MD	Baltimore	Wes	Blogg	Wesley Collins	155	68			1883-06-20	1883-07-30	blogw101	bloggwe01
blombro01	1948	8	23	USA	GA	Atlanta							Ron	Blomberg	Ronald Mark	195	73	L	R	1969-09-10	1978-10-01	blomr101	blombro01
blomdbe01	1970	12	30	USA	CA	Long Beach							Ben	Blomdahl	Benjamin Earl	185	74	R	R	1995-04-28	1995-09-30	blomb001	blomdbe01
blongjo01	1853	9	17	USA	MO	St. Louis	1892	9	17	USA	MO	St. Louis	Joe	Blong	Joseph Myles			R	R	1875-05-04	1877-10-06	blonj101	blongjo01
bloodji01	1917	7	26	USA	FL	Tallahassee	2002	8	17	USA	FL	Apalachicola	Jimmy	Bloodworth	James Henry	180	71	R	R	1937-09-14	1951-08-19	blooj101	bloodji01
bloombu01	1936	1	5	USA	OK	Oklahoma City	2011	12	21	USA	AR	Huntsville	Bud	Bloomfield	Clyde Stalcup	175	71	R	R	1963-09-25	1964-06-22	bloob101	bloombu01
bloomwi01	1977	11	27	USA	WA	Bremerton							Willie	Bloomquist	William Paul	200	71	R	R	2002-09-01	2015-06-28	bloow001	bloomwi01
blossgr01	1971	6	26	USA	FL	Manatee							Greg	Blosser	Gregory Brent	200	75	L	L	1993-09-05	1994-04-17	blosg001	blossgr01
blottja01	1902	8	24	USA	OH	Girard	1964	6	11	USA	MI	Ann Arbor	Jack	Blott	John Leonard	210	72	R	R	1924-07-30	1924-09-03	blotj101	blottja01
blowemi01	1965	4	24	Germany	Bavaria	Wurzburg							Mike	Blowers	Michael Roy	190	74	R	R	1989-09-01	1999-10-03	blowm001	blowemi01
bluebe01	1877	12	9	USA	OH	Bettsville	1929	9	2	USA	MI	Detroit	Bert	Blue	Bird Wayne	200	75	R	R	1908-06-15	1908-09-04	blueb101	bluebe01
bluegos01	1900	10	24	USA	IL	Chicago	1985	10	14	USA	MN	Edina	Ossie	Bluege	Oswald Louis	162	71	R	R	1922-04-24	1939-07-13	blueo102	bluegos01
bluegot01	1909	7	20	USA	IL	Chicago	1977	6	28	USA	IL	Chicago	Otto	Bluege	Otto Adam	154	70	R	R	1932-04-12	1933-10-01	blueo101	bluegot01
bluejji01	1887	7	8	USA	OK	Adair	1947	3	26	USA	IL	Pekin	Jim	Bluejacket	James	200	74	R	R	1914-08-06	1916-07-16	bluej101	bluejji01
bluelu01	1897	3	5	USA	DC	Washington	1958	7	28	USA	VA	Alexandria	Lu	Blue	Luzerne Atwell	165	70	B	L	1921-04-14	1933-04-25	bluel101	bluelu01
bluevi01	1949	7	28	USA	LA	Mansfield							Vida	Blue	Vida Rochelle	189	72	B	L	1969-07-20	1986-10-02	bluev001	bluevi01
bluhmre01	1894	6	27	USA	OH	Cleveland	1952	5	7	USA	MI	Flint	Red	Bluhm	Harvey Fred	165	71	R	R	1918-07-03	1918-07-03	bluhr101	bluhmre01
blumaja01	1972	5	18	USA	SC	Beaufort							Jaime	Bluma	James Andrew	195	71	R	R	1996-08-09	1996-09-27	blumj001	blumaja01
blumecl01	1898	10	17	USA	NY	Brooklyn	1973	6	12	USA	NY	Islip	Clint	Blume	Clinton Willis	175	71	R	R	1922-09-30	1923-07-13	blumc101	blumecl01
blumge01	1973	4	26	USA	CA	Redwood City							Geoff	Blum	Geoffrey Edward	220	75	B	R	1999-08-09	2012-07-17	blumg001	blumge01
blylebe01	1951	4	6	Netherlands	Utrecht	Zeist							Bert	Blyleven	Rik Aalbert	200	75	R	R	1970-06-05	1992-10-04	blylb001	blylebe01
blyzkmi01	1928	12	25	USA	MI	Hamtramck	2004	10	13	USA	WY	Cheyenne	Mike	Blyzka	Michael John	190	71	R	R	1953-04-21	1954-09-25	blyzm101	blyzkmi01
boakch01	1935	6	19	USA	PA	New Castle	1983	11	28	USA	PA	Emporium	Chet	Boak	Chester Robert	180	72	R	R	1960-09-18	1961-05-04	boakc101	boakch01
boardch01	1893	3	27	USA	NY	Seneca Falls	1968	8	10	USA	CA	Sacramento	Charlie	Boardman	Charles Louis	194	74	L	R	1913-09-26	1915-09-21	boarc101	boardch01
boardfr01	1851	2	18	USA	MO	St. Joseph	1941	4	12	USA	IN	Indianapolis	Frederick	Boardman	Frederick Stanley					1874-08-29	1874-08-29	boarf101	boardfr01
bobbra01	1948	1	1	USA	CA	Los Angeles	1982	6	13	USA	CA	Carnelian Bay	Randy	Bobb	Mark Randall	185	73	R	R	1968-08-15	1969-09-19	bobbr101	bobbra01
bocachi01	1976	3	4	P.R.		Ponce							Hiram	Bocachica	Hiram Colon	195	71	R	R	2000-09-13	2007-07-17	bocah001	bocachi01
boccajo01	1941	6	29	USA	CA	San Francisco							John	Boccabella	John Dominic	195	73	R	R	1963-09-02	1974-09-19	boccj101	boccajo01
bocekmi01	1912	7	16	USA	IL	Chicago	2007	4	29	USA	IL	Brookfield	Milt	Bocek	Milton Francis	185	73	R	R	1933-09-03	1934-08-02	bocem101	bocekmi01
bochtbr01	1950	11	12	USA	CA	Pasadena							Bruce	Bochte	Bruce Anton	195	75	L	L	1974-07-19	1986-10-05	bochb001	bochtbr01
bochtdo01	1970	7	5	USA	FL	West Palm Beach							Doug	Bochtler	Douglas Eugene	205	75	R	R	1995-05-05	2000-07-22	bochd001	bochtdo01
bochybr01	1955	4	16	France	Nouvelle-Aquitaine	Landes de Bussac							Bruce	Bochy	Bruce Douglas	205	75	R	R	1978-07-19	1987-10-04	bochb002	bochybr01
bochybr02	1987	8	27	USA	CA	San Diego							Brett	Bochy	Brett	200	74	R	R	2014-09-13	2015-10-04	bochb003	bochybr02
bockmed01	1920	7	26	USA	CA	Santa Ana	2011	9	29	USA	CA	Millbrae	Eddie	Bockman	Joseph Edward	175	69	R	R	1946-09-11	1949-10-02	bocke101	bockmed01
bockura01	1960	10	5	USA	OH	Canton							Randy	Bockus	Randy Walter	190	74	L	R	1986-09-10	1989-05-27	bockr001	bockura01
bococbr01	1985	3	9	USA	VA	Harrisonburg							Brian	Bocock	Brian William	185	71	R	R	2008-03-31	2010-10-03	bocob001	bococbr01
boddimi01	1957	8	23	USA	IA	Cedar Rapids							Mike	Boddicker	Michael James	172	71	R	R	1980-10-04	1993-06-13	boddm001	boddimi01
bodiepi01	1887	10	8	USA	CA	San Francisco	1961	12	17	USA	CA	San Francisco	Ping	Bodie	Frank Stephen	195	68	R	R	1911-04-22	1921-07-24	bodip101	bodiepi01
boeckto01	1892	8	25	USA	CA	Los Angeles	1924	2	16	USA	CA	La Jolla	Tony	Boeckel	Norman Doxie	175	70	R	R	1917-07-23	1923-10-06	boect101	boeckto01
boehlge01	1892	1	2	USA	IN	Lawrenceburg	1958	6	23	USA	IN	Lawrenceburg	George	Boehler	George Henry	180	74	R	R	1912-09-13	1926-09-07	boehg101	boehlge01
boehljo01	1891	3	20	USA	VA	Richmond	1941	9	8	USA	VA	Richmond	Joe	Boehling	John Joseph	168	71	L	L	1912-06-20	1920-06-03	boehj101	boehljo01
boehmle01	1941	6	28	USA	MO	Flint Hill							Len	Boehmer	Leonard Joseph Stephen	192	73	R	R	1967-06-18	1971-07-06	boehl101	boehmle01
boehrbr01	1969	1	8	USA	MO	St. Louis							Brian	Boehringer	Brian Edward	180	74	B	R	1995-04-30	2004-06-01	boehb001	boehrbr01
boernla01	1905	1	21	USA	VA	Staunton	1969	10	16	USA	VA	Staunton	Larry	Boerner	Lawrence Hyer	175	76	R	R	1932-06-30	1932-09-24	boerl101	boernla01
boescbr01	1985	4	12	USA	CA	Santa Monica							Brennan	Boesch	Brennan Philip	225	76	L	L	2010-04-23	2015-10-01	boesb001	boescbr01
boevejo01	1960	10	4	USA	MO	Kirkwood							Joe	Boever	Joseph Martin	200	73	R	R	1985-07-19	1996-09-29	boevj001	boevejo01
bogaexa01	1992	10	1	Aruba		Oranjestad							Xander	Bogaerts	Xander Jan	210	73	R	R	2013-08-20	2017-06-16	bogax001	bogaexa01
bogarjo01	1900	9	21	USA	PA	Bloomsburg	1986	12	7	USA	NY	Clarence	John	Bogart	John Renzie	195	74	R	R	1920-09-17	1920-10-03	bogaj101	bogarjo01
bogarti01	1966	10	28	USA	IN	Indianapolis							Tim	Bogar	Timothy Paul	198	74	R	R	1993-04-21	2001-07-01	bogat001	bogarti01
bogente01	1955	9	28	USA	MO	Hannibal							Terry	Bogener	Terry Wayne	193	72	L	L	1982-06-14	1982-10-03	boget101	bogente01
boggsbr01	1983	1	9	USA	MO	St. Louis							Brandon	Boggs	Brandon Kyle	210	72	B	R	2008-04-29	2011-05-24	boggb001	boggsbr01
boggsmi01	1984	2	15	USA	GA	Dalton							Mitchell	Boggs	Mitchell Thomas	235	76	R	R	2008-06-06	2013-09-27	boggm001	boggsmi01
boggsra01	1904	12	12	USA	KS	Reamsville	1989	11	27	USA	CO	Grand Junction	Ray	Boggs	Raymond Joseph	170	72	L	L	1928-09-01	1928-09-17	boggr101	boggsra01
boggsto01	1955	10	25	USA	NY	Poughkeepsie							Tommy	Boggs	Thomas Winton	195	74	R	R	1976-07-19	1985-05-07	boggt001	boggsto01
boggswa01	1958	6	15	USA	NE	Omaha							Wade	Boggs	Wade Anthony	190	74	L	R	1982-04-10	1999-08-27	boggw001	boggswa01
boglewa01	1946	10	19	USA	NJ	Passaic							Warren	Bogle	Warren Frederick	220	76	L	L	1968-07-31	1968-09-15	boglw101	boglewa01
bogusbr01	1984	2	18	USA	IL	Oak Lawn							Brian	Bogusevic	Brian Thomas	215	75	L	L	2010-09-01	2015-10-03	bogub001	bogusbr01
bohanbr01	1968	8	1	USA	TX	Denton							Brian	Bohanon	Brian Edward	210	74	L	L	1990-04-10	2001-08-17	bohab001	bohanbr01
bohenpa01	1890	9	30	USA	IA	Oakland	1942	4	8	USA	CA	Napa	Pat	Bohen	Leo Ignatius	155	70	R	R	1913-10-01	1914-09-06	bohep101	bohenpa01
bohnch01	1856	10		USA	OH	Cleveland	1903	8	1	USA	OH	Cleveland	Charlie	Bohn	Charles	165	69	R	R	1882-06-20	1882-07-13	bohnc101	bohnch01
bohnejo01	1961	1	18	USA	CA	Pasadena							John	Bohnet	John Kelly	175	72	B	L	1982-05-10	1982-05-21	bohnj101	bohnejo01
bohnesa01	1896	10	22	USA	CA	San Francisco	1977	5	23	USA	CA	Palo Alto	Sam	Bohne	Samuel Arthur	175	68	R	R	1916-09-09	1926-09-26	bohns101	bohnesa01
bohntj01	1980	1	17	USA	MN	St. Louis Park							T. J.	Bohn	Thomas Joseph	200	77	R	R	2006-08-22	2008-06-01	bohnt001	bohntj01
boiscbr01	1952	12	9	USA	CT	Putnam							Bruce	Boisclair	Bruce Armand	185	74	L	L	1974-09-11	1979-09-30	boisb101	boiscbr01
boitada01	1953	3	22	USA	CA	Sacramento							Dan	Boitano	Danny Jon	185	72	R	R	1978-10-01	1982-10-01	boitd101	boitada01
bokeldi01	1926	10	26	USA	IL	Arlington Heights							Dick	Bokelmann	Richard Werner	180	72	R	R	1951-08-03	1953-05-03	boked101	bokeldi01
bokenbo01	1908	2	23	USA	IL	Maryvale	1988	10	8	USA	NV	Las Vegas	Bob	Boken	Robert Anthony	165	74	R	R	1933-04-25	1934-09-30	bokeb101	bokenbo01
bokinjo01	1910	4	4	USA	MA	Northampton	1991	10	25	USA	TN	Chattanooga	Joe	Bokina	Joseph	184	72	R	R	1936-04-16	1936-05-09	bokij101	bokinjo01
bolan01														Boland						1875-09-04	1875-09-04	bolau101	bolan01
bolanbe01	1892	1	21	USA	NY	Rochester	1973	9	12	USA	MI	Detroit	Bernie	Boland	Bernard Anthony	168	68	R	R	1915-04-14	1921-06-17	bolab101	bolanbe01
bolaned01	1908	4	18	USA	NY	Long Island City	1993	2	5	USA	FL	Clearwater	Ed	Boland	Edward John	165	70	L	L	1934-09-18	1944-08-14	bolae101	bolaned01
boldch01	1894	10	27	Sweden		Karlskrona	1978	7	29	USA	MA	Chelsea	Charlie	Bold	Charles Dickens	185	74	R	R	1914-08-24	1914-08-28	boldc101	boldch01
boldebi01	1893	5	9	USA	TN	Dandridge	1966	12	8	USA	TN	Jefferson City	Bill	Bolden	William Horace	200	76	R	R	1919-06-27	1919-07-07	boldb101	boldebi01
bolenst01	1902	10	12	USA	AL	Jackson	1969	8	30	USA	AL	Mobile	Stew	Bolen	Stewart O'Neal	180	71	L	L	1926-04-15	1932-05-16	boles101	bolenst01
bolesca01	1934	10	31	USA	AR	Center Point							Carl	Boles	Carl Theodore	185	71	R	R	1962-08-02	1962-10-02	bolec101	bolesca01
bolesjo99	1948	8	19	USA	IL	Chicago							John	Boles	John							bolej801	bolesjo99
boleyjo01	1896	7	19	USA	PA	Mahanoy City	1962	12	30	USA	PA	Mahanoy City	Joe	Boley	John Peter	170	71	R	R	1927-04-12	1932-06-29	bolej101	boleyjo01
bolgeji01	1932	2	23	USA	OH	Cincinnati							Jim	Bolger	James Cyril	180	74	R	R	1950-06-24	1959-09-18	bolgj101	bolgeji01
bolicfr01	1966	6	28	USA	PA	Ashland							Frank	Bolick	Frank Charles	190	70	B	R	1993-04-05	1998-06-03	bolif001	bolicfr01
bolinbo01	1939	1	29	USA	SC	Hickory Grove							Bobby	Bolin	Bobby Donald	185	76	R	R	1961-04-18	1973-09-30	bolib101	bolinbo01
bollifr01	1931	11	16	USA	AL	Mobile							Frank	Bolling	Frank Elmore	175	73	R	R	1954-04-13	1966-09-15	bollf101	bollifr01
bollija01	1917	2	20	USA	AL	Mobile	1998	4	13	USA	FL	Panama City	Jack	Bolling	John Edward	168	71	L	L	1939-06-10	1944-09-20	bollj101	bollija01
bollimi01	1930	8	9	USA	MS	Mississippi City	2013	1	19	USA	AL	Mobile	Milt	Bolling	Milton Joseph	177	73	R	R	1952-09-10	1958-07-28	bollm101	bollimi01
bollogr01	1943	11	16	USA	MI	Detroit							Greg	Bollo	Gregory Gene	183	76	R	R	1965-05-09	1966-10-02	bollg101	bollogr01
bollwdo01	1921	2	12	USA	IL	Wheaton	1996	5	26	USA	IL	Wheaton	Don	Bollweg	Donald Raymond	190	73	L	L	1950-09-28	1955-05-10	bolld101	bollwdo01
bolsimi01	1988	1	29	USA	IL	Chicago							Mike	Bolsinger	Michael P.	215	73	R	R	2014-04-14	2017-05-31	bolsm001	bolsimi01
boltoce01	1904	2	13	USA	MS	Booneville	1993	8	25	USA	MS	Jackson	Cecil	Bolton	Cecil Glenford	195	76	L	L	1928-09-21	1928-09-30	boltc102	boltoce01
boltocl01	1907	4	10	USA	NC	High Point	1979	4	21	USA	NC	Lexington	Cliff	Bolton	William Clifton	160	69	L	R	1931-04-20	1941-09-24	boltc101	boltocl01
boltoro01	1968	9	23	USA	TN	Chattanooga							Rod	Bolton	Rodney Earl	190	74	R	R	1993-04-10	1995-09-19	boltr001	boltoro01
boltoto01	1962	5	6	USA	TN	Nashville							Tom	Bolton	Thomas Edward	172	74	L	L	1987-05-17	1994-07-30	boltt001	boltoto01
bombama01	1953	4	14	USA	VA	Portsmouth							Mark	Bomback	Mark Vincent	170	71	R	R	1978-09-12	1982-07-21	bombm101	bombama01
bondeje01	1982	10	28	USA	WA	Kennewick							Jeremy	Bonderman	Jeremy Allen	210	72	R	R	2003-04-02	2013-09-21	bondj001	bondeje01
bondsba01	1964	7	24	USA	CA	Riverside							Barry	Bonds	Barry Lamar	185	73	L	L	1986-05-30	2007-09-26	bondb001	bondsba01
bondsbo01	1946	3	15	USA	CA	Riverside	2003	8	23	USA	CA	San Carlos	Bobby	Bonds	Bobby Lee	190	73	R	R	1968-06-25	1981-10-04	bondb101	bondsbo01
bondto01	1856	4	2	Ireland		Granard	1941	1	24	USA	MA	Boston	Tommy	Bond	Thomas Henry	160	67	R	R	1874-05-05	1884-08-11	bondt101	bondto01
bondwa01	1937	10	19	USA	TN	Denmark	1967	9	14	USA	TX	Houston	Walt	Bond	Walter Franklin	228	79	L	R	1960-04-19	1967-05-07	bondw101	bondwa01
bonege01	1874	8	28	USA	CT	New Haven	1918	5	26	USA	CT	West Haven	George	Bone	George Drummond	152	67	B	R	1901-09-18	1901-09-28	boneg101	bonege01
bonesri01	1969	4	7	P.R.		Salinas							Ricky	Bones	Ricardo Ricky	200	70	R	R	1991-08-11	2001-10-05	boner001	bonesri01
bonetju01	1911	7	14	Italy	Liguria	Genoa	1952	6	17	USA	CA	Belmont	Julio	Bonetti	Julio Giacomo	180	72	R	R	1937-04-22	1940-04-22	bonej101	bonetju01
boneyha01	1903	10	28	USA	NC	Wallace	2002	6	12	USA	FL	Lake Worth	Hank	Boney	Henry Tate	176	71	L	R	1927-06-28	1927-07-13	boneh101	boneyha01
bongini01	1911	12	21	USA	LA	New Orleans	2009	1	6	USA	CA	San Jose	Nino	Bongiovanni	Anthony Thomas	175	70	L	L	1938-04-23	1939-10-01	bongn101	bongini01
bongju01	1980	7	15	South Korea	Seoul	Seoul							Jung	Bong	Jung Keun	175	75	L	L	2002-04-23	2004-06-20	bongj001	bongju01
bonhabi01	1948	10	1	USA	CA	Glendale							Bill	Bonham	William Gordon	190	75	R	R	1971-04-07	1980-07-26	bonhb101	bonhabi01
bonhati01	1913	8	16	USA	CA	Ione	1949	9	15	USA	PA	Pittsburgh	Tiny	Bonham	Ernest Edward	215	74	R	R	1940-08-05	1949-08-27	bonht101	bonhati01
bonifem01	1985	4	23	D.R.	Distrito Nacional	Santo Domingo							Emilio	Bonifacio	Emilio Jose	210	70	B	R	2007-09-02	2017-05-31	bonie001	bonifem01
bonifjo01	1993	6	4	D.R.	Distrito Nacional	Santo Domingo							Jorge	Bonifacio	Jorge Luis	195	73	R	R	2017-04-21	2017-06-16		bonifjo01
bonikjo01	1941	1	16	USA	PA	Philadelphia							Joe	Bonikowski	Joseph Peter	175	72	R	R	1962-04-12	1962-09-28	bonij101	bonikjo01
bonilbo01	1963	2	23	USA	NY	Bronx							Bobby	Bonilla	Roberto Martin Antonio	210	75	B	R	1986-04-09	2001-10-07	bonib001	bonilbo01
bonilju01	1956	1	12	P.R.		Santurce							Juan	Bonilla	Juan Guillermo	170	69	R	R	1981-04-09	1987-10-03	bonij001	bonilju01
bonilli01	1990	6	18	D.R.	Samana	Samana							Lisalverto	Bonilla	Lisalverto	225	72	B	R	2014-09-04	2017-06-05	bonil001	bonilli01
bonined01	1981	6	6	USA	GA	Columbus							Eddie	Bonine	Eddie Keith	220	77	R	R	2008-06-14	2010-10-01	bonie002	bonined01
boninlu01	1888	1	13	USA	IN	Greenhill	1966	1	3	USA	OH	Sycamore	Luther	Bonin	Ernest Luther	178	69	L	R	1913-04-13	1914-05-16	bonil101	boninlu01
bonneba01	1953	10	27	USA	OH	Mariemont							Barry	Bonnell	Robert Barry	190	75	R	R	1977-05-04	1986-07-12	bonnb001	bonneba01
bonnebi01	1923	12	15	USA	OH	Cleveland	1977	12	3	USA	OH	Cleveland	Bill	Bonness	William John	200	76	R	L	1944-09-26	1944-09-29	bonnb102	bonnebi01
bonnebo01	1956	8	12	USA	TX	Uvalde							Bobby	Bonner	Robert Averill	185	72	R	R	1980-09-12	1983-09-28	bonnb101	bonnebo01
bonnefr01	1869	8	20	USA	MA	Lowell	1905	12	31	USA	MO	Kansas City	Frank	Bonner	Frank J.	169	67	R	R	1894-04-26	1903-06-25	bonnf101	bonnefr01
bonogu01	1894	8	29	USA	MO	Doe Run	1948	12	3	USA	MI	Dearborn	Gus	Bono	Adlai Wendell	175	71	R	R	1920-09-13	1920-10-03	bonog101	bonogu01
bonsebo01	1981	10	14	USA	FL	St. Petersburg							Boof	Bonser	Boof	245	76	R	R	2006-05-21	2010-10-03	bonsb001	bonsebo01
bonurze01	1908	9	20	USA	LA	New Orleans	1987	3	9	USA	LA	New Orleans	Zeke	Bonura	Henry John	210	72	R	R	1934-04-17	1940-09-26	bonuz101	bonurze01
booeev01	1891	9	28	USA	NC	Mocksville	1969	3	21	USA	TX	Kenedy	Everett	Booe	Everett Little	165	68	L	R	1913-04-13	1914-10-05	booee101	booeev01
bookebu01	1942	5	28	USA	VA	Lynchburg							Buddy	Booker	Richard Lee	170	70	L	R	1966-06-04	1968-06-14	bookb101	bookebu01
bookech01	1976	12	9	USA	AL	Monroeville							Chris	Booker	Christopher Scott	230	75	R	R	2005-09-05	2007-07-25	bookc001	bookech01
bookegr01	1960	6	22	USA	VA	Lynchburg							Greg	Booker	Gregory Scott	230	78	R	R	1983-09-11	1990-05-26	bookg001	bookegr01
bookero01	1958	9	4	USA	CA	Los Angeles							Rod	Booker	Roderick Stewart	175	72	L	R	1987-04-29	1991-07-14	bookr001	bookero01
boolal01	1897	8	24	USA	NE	Lincoln	1981	9	27	USA	NE	Lincoln	Al	Bool	Albert	180	71	R	R	1928-09-29	1931-09-27	boola101	boolal01
boolere01	1880	7	14	USA	LA	Bernice	1955	3	16	USA	LA	Monroe	Red	Booles	Seabron Jesse	150	70	L	L	1909-07-30	1909-08-20	boolr101	boolere01
booneaa01	1973	3	9	USA	CA	La Mesa							Aaron	Boone	Aaron John	190	74	R	R	1997-06-20	2009-10-04	boona001	booneaa01
boonebo01	1947	11	19	USA	CA	San Diego							Bob	Boone	Robert Raymond	195	74	R	R	1972-09-10	1990-09-27	boonb001	boonebo01
boonebr01	1969	4	6	USA	CA	El Cajon							Bret	Boone	Bret Robert	180	70	R	R	1992-08-19	2005-07-30	boonb002	boonebr01
booneda01	1895	1	19	USA	AL	Samantha	1968	6	11	USA	AL	Tuscaloosa	Dan	Boone	James Albert	190	74	R	R	1919-09-10	1923-10-06	boond102	booneda01
booneda02	1954	1	14	USA	CA	Long Beach							Danny	Boone	Daniel Hugh	150	68	L	L	1981-04-11	1990-09-30	boond101	booneda02
boonege01	1871	3	1	USA	KY	Louisville	1910	9	24	USA	KY	Louisville	George	Boone	George Morris					1891-04-23	1891-05-13	boong101	boonege01
booneik01	1897	2	17	USA	AL	Samantha	1958	8	1	USA	AL	Northport	Ike	Boone	Isaac Morgan	195	72	L	R	1922-04-22	1932-05-09	booni101	booneik01
boonelu01	1890	5	6	USA	PA	Pittsburgh	1982	7	29	USA	PA	Pittsburgh	Luke	Boone	Lute Joseph	160	69	R	R	1913-09-09	1918-09-02	boonl101	boonelu01
boonera01	1923	7	27	USA	CA	San Diego	2004	10	17	USA	CA	San Diego	Ray	Boone	Raymond Otis	172	72	R	R	1948-09-03	1960-08-11	boonr101	boonera01
bootcch01	1978	10	24	USA	IN	La Porte							Chris	Bootcheck	Christopher Brandon	210	77	R	R	2003-09-09	2013-06-14	bootc001	bootcch01
booth01														Booth						1875-05-01	1875-05-01	bootu101	booth01
bootham01	1848	9	4	USA	OH	Lebanon	1921	7	1	USA	OH	Miamisburg	Amos	Booth	Amos Smith	159	69	R	R	1876-04-25	1882-09-28	boota101	bootham01
boothed01				USA	NY	Brooklyn							Eddie	Booth	Edward H.					1872-04-26	1876-10-17	boote101	boothed01
bootyjo01	1975	4	29	USA	MS	Starkville							Josh	Booty	Joshua Gibson	210	75	R	R	1996-09-24	1998-04-11	bootj001	bootyjo01
boozejo01	1938	7	6	USA	SC	Columbia	1986	1	24	USA	SC	Lexington	John	Boozer	John Morgan	205	75	R	R	1962-07-22	1969-10-01	boozj101	boozejo01
borboju01	1986	2	20	USA	MS	Starkville							Julio	Borbon	Julio Alberto	195	72	L	L	2009-06-29	2016-08-27	borbj001	borboju01
borbope01	1946	12	2	D.R.	Valverde	Mao	2012	6	4	USA	TX	Pharr	Pedro	Borbon	Pedro	185	74	R	R	1969-04-09	1980-05-25	borbp101	borbope01
borbope02	1967	11	15	D.R.	Valverde	Mao							Pedro	Borbon	Pedro Felix	205	73	R	L	1992-10-02	2003-08-15	borbp001	borbope02
borchge01	1869	4	18	USA	CA	Sacramento	1938	10	24	USA	CA	Sacramento	George	Borchers	George Bernard	180	70	B	R	1888-05-18	1895-05-26	borcg101	borchge01
borchjo01	1978	11	25	USA	CA	Panorama City							Joe	Borchard	Joseph Edward	230	76	B	R	2002-09-02	2007-08-05	borcj001	borchjo01
bordafr01	1910	1	3	USA	CA	Coalinga	2000	4	13	USA	CA	Ventura	Frenchy	Bordagaray	Stanley George	175	67	R	R	1934-04-17	1945-09-30	bordf101	bordafr01
bordejo01	1854	5	9	USA	NJ	Jacobstown	1929	10	14	USA	PA	Yeadon	Joe	Borden	Joseph Emley	140	69	R	R	1875-07-24	1876-07-15	bordj101	bordejo01
bordepa01	1963	5	14	USA	OH	Columbus							Pat	Borders	Patrick Lance	190	74	R	R	1988-04-06	2005-07-27	bordp001	bordepa01
bordimi01	1965	7	21	USA	MI	Marquette							Mike	Bordick	Michael Todd	170	71	R	R	1990-04-11	2003-09-28	bordm001	bordimi01
bordiri01	1959	4	18	USA	CA	San Francisco							Rich	Bordi	Richard Albert	210	79	R	R	1980-07-16	1988-07-19	bordr001	bordiri01
bordlbi01	1958	1	9	USA	CA	Los Angeles							Bill	Bordley	William Clarke	185	75	R	L	1980-06-30	1980-09-09	bordb101	bordlbi01
borgmgl01	1950	5	25	USA	NJ	Paterson							Glenn	Borgmann	Glenn Dennis	210	76	R	R	1972-07-01	1980-10-05	borgg101	borgmgl01
borispa01	1955	12	13	USA	NJ	Irvington							Paul	Boris	Paul Stanley	200	74	R	R	1982-05-21	1982-10-03	borip101	borispa01
borkfr01	1940	7	13	USA	NY	Buffalo							Frank	Bork	Frank Bernard	175	74	R	L	1964-04-15	1964-10-03	borkf101	borkfr01
borkobo01	1926	1	27	USA	OH	Dayton							Bob	Borkowski	Robert Vilarian	182	72	R	R	1950-04-22	1955-07-10	borkb101	borkobo01
borkoda01	1977	2	7	USA	MI	Detroit							Dave	Borkowski	David Richard	200	73	R	R	1999-07-17	2008-09-27	borkd001	borkoda01
borlato01	1933	2	14	USA	KS	El Dorado	2013	3	2	USA	OK	Stillwater	Tom	Borland	Thomas Bruce	172	75	L	L	1960-05-15	1961-04-23	borlt101	borlato01
borlato02	1969	5	29	USA	LA	Ruston							Toby	Borland	Toby Shawn	186	78	R	R	1994-05-27	2004-06-24	borlt001	borlato02
bormajo01	1993	4	4	USA	VA	Danville							John	Bormann	John William	205	72	R	R	2017-04-30	2017-04-30		bormajo01
boromre01	1915	10	30	USA	SC	Spartanburg	2011	1	7	USA	TX	Dallas	Red	Borom	Edward Jones	180	71	L	R	1944-04-23	1945-09-30	boror101	boromre01
borosst01	1936	9	3	USA	MI	Flint	2010	12	29	USA	FL	Deland	Steve	Boros	Stephen	185	72	R	R	1957-06-19	1965-05-08	boros101	borosst01
borowha01	1916	5	12	USA	NJ	Bloomfield	2004	8	23	USA	NJ	Brick	Hank	Borowy	Henry Ludwig	175	72	R	R	1942-04-18	1951-09-14	boroh101	borowha01
borowjo01	1971	5	4	USA	NJ	Bayonne							Joe	Borowski	Joseph Thomas	225	74	R	R	1995-07-09	2008-07-01	boroj001	borowjo01
bortoba01	1888	8	14	USA	IL	Marion	1954	7	29	USA	CA	Berkeley	Babe	Borton	William Baker	178	72	L	L	1912-09-02	1916-09-30	bortb101	bortoba01
boscajc01	1979	12	26	Venezuela	Zulia	Maracaibo							J. C.	Boscan	Jean Carlos	215	74	R	R	2010-10-01	2013-09-29	boscj001	boscajc01
boscawi01	1989	10	26	Venezuela	Zulia	Maracaibo							Wilfredo	Boscan	Wilfredo Jose	175	74	R	R	2016-05-19	2016-06-21	boscw001	boscawi01
boschdo01	1942	7	15	USA	CA	San Francisco							Don	Bosch	Donald John	160	70	B	R	1966-09-19	1969-07-09	boscd101	boschdo01
bosetri01	1953	8	5	USA	CA	Redding							Rick	Bosetti	Richard Alan	185	71	R	R	1976-09-09	1982-05-26	boser101	bosetri01
boshebu01	1988	5	9	USA	AL	Huntsville							Buddy	Boshers	Jeffrey Alan	205	75	L	L	2013-08-10	2017-06-14	boshb001	boshebu01
bosioch01	1963	4	3	USA	CA	Carmichael							Chris	Bosio	Christopher Louis	220	75	R	R	1986-08-03	1996-09-22	bosic001	bosioch01
boskish01	1967	3	28	USA	NV	Hawthorne							Shawn	Boskie	Shawn Kealoha	205	75	R	R	1990-05-20	1998-07-18	bosks001	boskish01
bosleth01	1956	9	17	USA	CA	Oceanside							Thad	Bosley	Thaddis	175	75	L	L	1977-06-29	1990-05-30	boslt001	bosleth01
bosmadi01	1944	2	17	USA	WI	Kenosha							Dick	Bosman	Richard Allen	205	74	R	R	1966-06-01	1976-09-19	bosmd101	bosmadi01
bosseme01	1914	2	8	USA	PA	Johnstown	1986	3	26	USA	TN	Crossville	Mel	Bosser	Melvin Edward	173	72	R	R	1945-04-29	1945-06-09	bossm101	bosseme01
bossha01	1908	11	19	USA	LA	Hodge	1964	5	15	USA	TN	Nashville	Harley	Boss	Elmer Harley	185	71	L	L	1928-07-19	1933-09-24	bossh101	bossha01
bostich01	1993	3	24	USA	NY	Rochester							Christopher	Bostick	Christopher Michael	190	70	R	R	2017-05-08	2017-05-10		bostich01
bostihe01	1895	1	12	USA	MA	Boston	1968	9	16	USA	CO	Denver	Henry	Bostick	Henry Landers		70	R	R	1915-05-18	1915-05-19	bosth101	bostihe01
bostoda01	1963	1	4	USA	OH	Cincinnati							Daryl	Boston	Daryl Lamont	185	75	L	L	1984-05-13	1994-08-11	bostd001	bostoda01
bostoly01	1950	11	22	USA	AL	Birmingham	1978	9	24	USA	IN	Gary	Lyman	Bostock	Lyman Wesley	180	73	L	R	1975-04-08	1978-09-23	bostl101	bostoly01
boswean01	1873	9	26	USA	NJ	New Gretna	1936	2	3	USA	NJ	Ocean City	Andy	Boswell	Andrew Cottrell	165	73		R	1895-05-10	1895-09-30	boswa101	boswean01
bosweda01	1945	1	20	USA	MD	Baltimore	2012	6	11	USA	MD	Joppa	Dave	Boswell	David Wilson	185	75	R	R	1964-09-18	1971-09-17	boswd101	bosweda01
bosweke01	1946	2	23	USA	TX	Austin							Ken	Boswell	Kenneth George	170	72	L	R	1967-09-18	1977-10-01	boswk101	bosweke01
botelde01	1956	8	2	USA	CA	Long Beach							Derek	Botelho	Derek Wayne	180	74	R	R	1982-07-18	1985-09-24	boted001	botelde01
bottajo01	1908	9	14	USA	CA	Crockett	1976	10	8	USA	NM	Jemez Springs	John	Bottarini	John Charles	190	72	R	R	1937-04-22	1937-09-09	bottj102	bottajo01
bottari01	1969	8	26	USA	CT	New Britain							Ricky	Bottalico	Ricky Paul	200	73	L	R	1994-07-29	2005-07-22	bottr001	bottari01
botteke01	1968	11	14	USA	OR	Portland							Kent	Bottenfield	Kent Dennis	225	75	R	R	1992-07-06	2001-06-09	bottk001	botteke01
bottira01	1955	5	12	USA	ME	Houlton							Ralph	Botting	Ralph Wayne	195	72	L	L	1979-06-28	1980-10-05	bottr101	bottira01
bottoji01	1900	4	23	USA	IL	Oglesby	1959	12	11	USA	MO	St. Louis	Jim	Bottomley	James Leroy	180	72	L	L	1922-08-18	1937-09-16	bottj101	bottoji01
bottsja01	1980	7	26	USA	CA	Paso Robles							Jason	Botts	Jason Carl	250	77	B	R	2005-09-14	2008-04-27	bottj001	bottsja01
botzbo01	1935	4	28	USA	WI	Milwaukee							Bob	Botz	Robert Allen	170	71	R	R	1962-05-08	1962-09-29	botzb101	botzbo01
bouchal01	1881	11	13	USA	MA	Franklin	1974	6	23	USA	CA	Torrance	Al	Boucher	Alexander Francis	156	68	R	R	1914-04-16	1914-10-08	bouca101	bouchal01
bouchde01	1968	3	7	CAN	QC	Montreal							Denis	Boucher	Denis	195	73	R	L	1991-04-12	1994-05-21	boucd001	bouchde01
bouched01	1933	3	7	USA	MT	Livingston	2013	1	23	USA	AZ	Phoenix	Ed	Bouchee	Edward Francis	200	72	L	L	1956-09-19	1962-07-29	bouce101	bouched01
bouchme01	1886	3	12	USA	MO	St. Louis	1974	3	12	USA	CA	Martinez	Medric	Boucher	Medric Charles Francis	165	70	R	R	1914-05-20	1914-09-10	boucm101	bouchme01
boudrlo01	1917	7	17	USA	IL	Harvey	2001	8	10	USA	IL	Olympia Fields	Lou	Boudreau	Louis	185	71	R	R	1938-09-09	1952-08-24	boudl101	boudrlo01
bouldca01	1939	9	17	USA	KY	Germantown							Carl	Bouldin	Carl Edward	180	74	B	R	1961-09-02	1964-07-05	boulc101	bouldca01
boultja01	1884	8	6	USA	MO	St. Louis	1955	12	24	USA	MO	St. Louis	Jake	Boultes	Jacob John		75	R	R	1907-04-18	1909-06-24	boulj101	boultja01
bourgja01	1982	1	4	USA	TX	Houston							Jason	Bourgeois	Jason Jerrod	195	69	R	R	2008-09-09	2015-10-04	bourj001	bourgja01
bourgst01	1972	8	4	USA	LA	Lutcher							Steve	Bourgeois	Steven James	205	73	R	R	1996-04-03	1996-09-28	bours001	bourgst01
bourjch01	1954	10	16	USA	IL	Chicago							Chris	Bourjos	Christopher	185	72	R	R	1980-08-31	1980-10-05	bourc101	bourjch01
bourjpe01	1987	3	31	USA	IL	Park Ridge							Peter	Bourjos	Peter Christopher	175	73	R	R	2010-08-03	2017-06-16	bourp001	bourjpe01
bourju01	1988	5	28	USA	DC	Washington							Justin	Bour	Justin James	265	75	L	R	2014-06-05	2017-06-16	bourj002	bourju01
bournmi01	1982	12	27	USA	TX	Houston							Michael	Bourn	Michael Ray	190	71	L	R	2006-07-30	2016-10-02	bourm001	bournmi01
bournra01	1966	5	12	D.R.	Azua	Azua							Rafael	Bournigal	Rafael Antonio	160	71	R	R	1992-09-01	1999-10-03	bourr001	bournra01
bourqpa01	1947	3	23	USA	MA	Worcester							Pat	Bourque	Patrick Daniel	210	72	L	L	1971-09-06	1974-09-28	bourp101	bourqpa01
boutoji01	1939	3	8	USA	NJ	Newark							Jim	Bouton	James Alan	170	72	R	R	1962-04-22	1978-09-29	boutj101	boutoji01
boveemi01	1973	8	21	USA	CA	San Diego							Mike	Bovee	Michael Craig	200	70	R	R	1997-09-13	1997-09-28	bovem001	boveemi01
bowala01	1945	12	6	USA	CA	Sacramento							Larry	Bowa	Lawrence Robert	155	70	B	R	1970-04-07	1985-10-06	bowal001	bowala01
bowcobe01	1879	10	28	USA	MA	Fall River	1961	6	16	USA	MA	Taunton	Benny	Bowcock	Benjamin James	150	67	R	R	1903-09-18	1903-09-28	bowcb101	bowcobe01
bowdemi01	1986	9	9	USA	IL	Winfield							Michael	Bowden	Michael Matthew	215	75	R	R	2008-08-30	2013-09-03	bowdm001	bowdemi01
bowdeti01	1891	8	15	USA	GA	McDonough	1949	10	25	USA	GA	Emory	Tim	Bowden	David Timon	175	70	L	R	1914-09-17	1914-09-27	bowdt101	bowdeti01
bowench01	1897	7	26	USA	CT	New Haven	1948	8	9	USA	CT	New Haven	Chick	Bowen	Emmons Joseph	165	67	R	R	1919-09-15	1919-09-28	bowec102	bowench01
bowency01	1871	2	17	USA	IN	Kingston	1925	1	25	USA	IN	Greensburg	Cy	Bowen	Sutherland McCoy	175	72	R	R	1896-04-28	1896-04-28	bowec101	bowency01
bowenro01	1981	2	24	USA	TX	Bedford							Rob	Bowen	Robert McClure	210	74	B	R	2003-09-01	2008-09-24	bower002	bowenro01
bowenry01	1968	2	10	USA	CA	Hanford							Ryan	Bowen	Ryan Eugene	185	72	R	R	1991-07-22	1995-10-01	bower001	bowenry01
bowensa01	1938	3	23	USA	NC	Wilmington	2003	3	28	USA	NC	Wilmington	Sam	Bowens	Samuel Edward	188	73	R	R	1963-09-07	1969-07-26	bowes103	bowensa01
bowensa02	1952	9	18	USA	GA	Brunswick							Sam	Bowen	Samuel Thomas	170	69	R	R	1977-08-25	1980-10-04	bowes101	bowensa02
bowerbi01	1922	3	25	USA	AR	Parkin	1996	9	17	USA	AR	Wynne	Billy	Bowers	Grover Bill	176	69	L	R	1949-04-24	1949-06-09	boweb101	bowerbi01
bowerbr01	1971	5	2	USA	IL	Bridgeview							Brent	Bowers	Brent Raymond	200	75	L	R	1996-08-16	1996-09-29	boweb001	bowerbr01
bowerce01	1978	2	10	USA	FL	Gainesville							Cedrick	Bowers	Cedrick Jerome	220	74	B	L	2008-07-02	2010-07-30	bowec001	bowerce01
bowerfr01	1868	12	5	USA	MI	Romeo	1948	11	30	USA	MI	Romeo	Frank	Bowerman	Frank Eugene	190	74	R	R	1895-08-24	1909-07-13	bowef102	bowerfr01
bowersh01	1971	7	27	USA	CA	Glendora							Shane	Bowers	Shane Patrick	215	76	R	R	1997-07-26	1997-08-16	bowes001	bowersh01
bowerst01	1915	2	26	USA	PA	New Freedom	2005	12	14	USA	PA	Havertown	Stew	Bowers	Stewart Cole	170	72	B	R	1935-08-05	1937-05-18	bowes102	bowerst01
bowesfr01	1865			USA	NY	Bath	1895	1	21	USA	NY	Brooklyn	Frank	Bowes	Frank M.	160	69		R	1890-04-17	1890-08-25	bowef101	bowesfr01
bowieji01	1965	2	17	Japan	Tokyo	Tokyo							Jim	Bowie	James R.	205	72	L	L	1994-08-03	1994-08-11	bowij001	bowieji01
bowiemi01	1974	11	10	USA	TX	Humble							Micah	Bowie	Micah Andrew	185	76	L	L	1999-07-24	2008-04-21	bowim001	bowiemi01
bowkejo01	1983	7	8	USA	CA	Sacramento							John	Bowker	John Brite	205	73	L	L	2008-04-12	2011-09-27	bowkj001	bowkejo01
bowlebr01	1976	8	18	USA	CA	Harbor City							Brian	Bowles	Brian Christopher	220	77	R	R	2001-06-27	2003-09-08	bowlb001	bowlebr01
bowlech01	1917	3	15	USA	MA	Norwood	2003	12	23	USA	NC	Newton	Charlie	Bowles	Charles James	180	75	R	R	1943-09-25	1945-09-19	bowlc101	bowlech01
bowleem01	1898	8	2	USA	OK	Wanette	1959	9	3	USA	AZ	Flagstaff	Emmett	Bowles	Emmett Jerome	180	72	R	R	1922-09-12	1922-09-12	bowle101	bowleem01
bowlegr01	1907	10	24	USA	CO	Denver	1968	6	25	USA	CO	Denver	Grant	Bowler	Grant Tierney	190	72	R	R	1931-08-21	1932-08-14	bowlg101	bowlegr01
bowlist01	1952	6	26	USA	OK	Tulsa							Steve	Bowling	Stephen Shaddon	185	72	R	R	1976-09-07	1977-10-02	bowls101	bowlist01
bowliwe01	1940	12	10	USA	AR	Paragould							Weldon	Bowlin	Lois Weldon	155	69	R	R	1967-09-16	1967-09-17	bowlw101	bowliwe01
bowmaab01	1893	1	25	USA	IL	Greenup	1979	10	11	USA	TX	Longview	Abe	Bowman	Alvah Edson	190	73	R	R	1914-05-19	1915-06-23	bowma101	bowmaab01
bowmabi01	1867	1	23	USA	IL	Chicago	1944	12	28	USA	IL	Chicago	Bill	Bowman	William G.	180	71			1891-06-18	1891-08-05	bowmb101	bowmabi01
bowmabo01	1910	10	3	USA	WV	Keystone	1972	9	4	USA	WV	Bluefield	Bob	Bowman	Robert James	160	70	R	R	1939-04-21	1942-05-25	bowmb103	bowmabo01
bowmabo02	1931	5	10	USA	CA	Laytonville	2017	1	27	USA	CA	San Jose	Bob	Bowman	Robert Leroy	195	73	R	R	1955-04-16	1959-09-18	bowmb102	bowmabo02
bowmael01	1897	3	19	USA	VT	Proctor	1985	12	17	USA	CA	Los Angeles	Elmer	Bowman	Elmari Wilhelm	193	72	R	R	1920-08-03	1920-08-09	bowme102	bowmael01
bowmaer01	1935	7	28	USA	TN	Johnson City							Ernie	Bowman	Ernest Ferrell	160	70	R	R	1961-04-12	1963-09-29	bowme101	bowmaer01
bowmajo01	1910	6	17	USA	KS	Kansas City	1990	11	22	USA	MO	Kansas City	Joe	Bowman	Joseph Emil	190	74	L	R	1932-04-18	1945-09-29	bowmj101	bowmajo01
bowmama01	1991	5	31	USA	MD	Chevy Chase							Matthew	Bowman	Matthew Chou	175	72	R	R	2016-04-06	2017-06-14	bowmm001	bowmama01
bowmaro01	1927	8	18	USA	NY	Amsterdam	1997	7	21	USA	CA	Los Angeles	Roger	Bowman	Roger Clinton	175	72	R	L	1949-09-22	1955-05-22	bowmr101	bowmaro01
bowmasu01	1867	2	9	USA	PA	Millersburg	1954	1	11	USA	PA	Millersburg	Sumner	Bowman	Sumner Sallade	160	72	L	L	1890-06-11	1891-10-05	bowms101	bowmasu01
bowsere01	1881	9	20	USA	PA	Freeport	1943	5	22	USA	WV	Moundsville	Red	Bowser	James Harvey	145	69			1910-09-13	1910-09-13	bowsr101	bowsere01
bowsfte01	1935	1	10	CAN	BC	Vernon							Ted	Bowsfield	Edward Oliver	190	73	R	L	1958-07-20	1964-10-04	bowst101	bowsfte01
bowyetr01	1981	8	3	USA	VA	Lynchburg							Travis	Bowyer	Travis Charlton	210	75	R	R	2005-09-10	2005-09-29	bowyt001	bowyetr01
boxbebr01	1988	5	27	USA	CA	Fullerton							Brad	Boxberger	Bradley George	205	74	R	R	2012-06-10	2016-10-02	boxbb001	boxbebr01
boydbi01	1852	12	22	USA	NY	New York	1912	10	1	USA	NY	Jamaica	Bill	Boyd	William John	250				1872-04-22	1875-10-09	boydb101	boydbi01
boydbo01	1919	10	1	USA	MS	Potts Camp	2004	9	7	USA	KS	Wichita	Bob	Boyd	Robert Richard	170	70	L	L	1951-09-08	1961-09-24	boydb102	boydbo01
boydfr01	1868	4	2	USA	PA	West Middletown	1937	12	16	USA	PA	Oil City	Frank	Boyd	Frank Jay	168		R	R	1893-05-18	1893-05-19	boydf101	boydfr01
boydga01	1946	8	22	USA	CA	Pasadena							Gary	Boyd	Gary Lee	200	76	R	R	1969-08-01	1969-09-26	boydg101	boydga01
boydja01	1874	1	19	USA	WV	Martinsburg	1932	8	12	USA	PA	Gettysburg	Jake	Boyd	Jacob Henry	160			L	1894-09-20	1896-05-08	boydj101	boydja01
boydja02	1973	2	23	USA	IL	St. Clair							Jason	Boyd	Jason Pernell	170	75	R	R	1999-09-10	2004-05-13	boydj001	boydja02
boydma01	1991	2	2	USA	WA	Bellevue							Matt	Boyd	Matthew Robert	215	75	L	L	2015-06-27	2017-05-31	boydm001	boydma01
boydoi01	1959	10	6	USA	MS	Meridian							Oil Can	Boyd	Dennis Ray	155	73	R	R	1982-09-13	1991-10-01	boydo001	boydoi01
boydra01	1887	2	11	USA	IN	Hortonville	1920	2	17	USA	IN	Hortonville	Ray	Boyd	Raymond C.	160	70	R	R	1910-09-24	1911-10-12	boydr101	boydra01
boyerbl01	1981	7	11	USA	GA	Atlanta							Blaine	Boyer	Blaine Thomas	225	75	R	R	2005-06-12	2017-06-13	boyeb001	boyerbl01
boyercl01	1927	9	1	USA	MO	Alba							Cloyd	Boyer	Cloyd Victor	188	73	R	R	1949-04-23	1955-09-24	boyec101	boyercl01
boyercl02	1937	2	9	USA	MO	Cossville	2007	6	4	USA	GA	Lawrenceville	Clete	Boyer	Cletis Leroy	165	72	R	R	1955-06-05	1971-05-23	boyec102	boyercl02
boyerke01	1931	5	20	USA	MO	Liberty	1982	9	7	USA	MO	St. Louis	Ken	Boyer	Kenton Lloyd	190	73	R	R	1955-04-12	1969-08-09	boyek101	boyerke01
boylado01	1955	1	6	USA	IL	Chicago							Doe	Boyland	Dorian Scott	200	76	L	L	1978-09-04	1981-10-04	boyld101	boylado01
boylebu01	1908	2	9	USA	OH	Cincinnati	1978	11	12	USA	OH	Cincinnati	Buzz	Boyle	Ralph Francis	170	71	L	L	1929-09-11	1935-09-29	boylb101	boylebu01
boyleed01	1874	5	8	USA	OH	Cincinnati	1941	2	10	USA	OH	Cincinnati	Eddie	Boyle	Edward Joseph	200	75	R	R	1896-04-17	1896-09-16	boyle101	boyleed01
boyleha01	1911	11	29	USA	IL	Granite City	2005	1	7	USA	TX	McAllen	Harry	Boyles	Harry	185	77	R	R	1938-08-03	1939-08-23	boylh101	boyleha01
boylehe01	1860	9	20	USA	PA	Philadelphia	1932	5	25	USA	PA	Philadelphia	Henry	Boyle	Henry J.	165	73	R	R	1884-07-09	1889-10-02	boylh102	boylehe01
boyleja01	1866	3	22	USA	OH	Cincinnati	1913	1	6	USA	OH	Cincinnati	Jack	Boyle	John Anthony	190	76	R	R	1886-10-08	1898-08-16	boylj102	boyleja01
boyleja02	1889	7	9	USA	IL	Morris	1971	4	3	USA	FL	Fort Lauderdale	Jack	Boyle	John Bellew	165	71	L	R	1912-06-28	1912-10-05	boylj101	boyleja02
boyleji01	1904	1	19	USA	OH	Cincinnati	1958	12	24	USA	OH	Cincinnati	Jim	Boyle	James John	180	72	R	R	1926-06-20	1926-06-20	boylj103	boyleji01
bozema01	1971	5	23	USA	AZ	San Manuel							Marshall	Boze	Marshall Wayne	214	73	R	R	1996-04-28	1996-07-13	bozem001	bozema01
brabege01	1941	8	16	USA	WI	Madison	1996	12	27	USA	WI	Madison	Gene	Brabender	Eugene Mathew	225	77	R	R	1966-05-11	1970-09-26	brabg101	brabege01
brachbr01	1986	4	12	USA	NJ	Freehold							Brad	Brach	Brad	215	78	R	R	2011-08-31	2017-06-14	bracb001	brachbr01
brachsi01	1992	7	17	Venezuela	Zulia	Maracaibo							Silvino	Bracho	Silvino	190	70	R	R	2015-08-30	2017-06-13	bracs001	brachsi01
brackan01	1985	12	4	USA	OH	Cincinnati							Andrew	Brackman	Andrew Warren	230	82	R	R	2011-09-22	2011-09-28	braca001	brackan01
brackgi01	1908	3	29	USA	IL	Chicago	1960	1	20	USA	TX	Greenville	Gibby	Brack	Gilbert Herman	170	69	R	R	1937-04-23	1939-09-28	bracg101	brackgi01
brackja01	1881	4	14	USA	OH	Cleveland	1954	7	16	USA	MI	Highland Park	Jack	Bracken	John James	175	71	R	R	1901-08-07	1901-09-27	bracj102	brackja01
brackjo01	1880	12	24	USA	PA	Harrisburg	1953	3	20	USA	PA	Harrisburg	John	Brackenridge	John Givler		72	R	R	1904-04-15	1904-05-30	bracj101	brackjo01
braddza01	1987	8	23	USA	NJ	Mount Holly							Zach	Braddock	William Zachary	220	74	L	L	2010-05-23	2011-07-14	bradz001	braddza01
bradeda01	1983	8	13	USA	AZ	Phoenix							Dallas	Braden	Dallas Lee	185	73	L	L	2007-04-24	2011-04-16	bradd002	bradeda01
bradedo01	1934	10	4	USA	NC	Charlotte							Don	Bradey	Donald Eugene	180	69	R	R	1964-09-25	1964-10-04	bradd102	bradedo01
bradfbi01	1921	8	28	USA	AR	Choctaw	2000	8	22	USA	AR	Fairfield Bay	Bill	Bradford	William D.	180	74	R	R	1956-04-24	1956-04-24	bradb106	bradfbi01
bradfbu01	1944	7	25	USA	AL	Mobile							Buddy	Bradford	Charles William	170	71	R	R	1966-09-09	1976-07-24	bradb105	bradfbu01
bradfch01	1974	9	14	USA	MS	Jackson							Chad	Bradford	Chadwick Lee	205	77	R	R	1998-08-01	2009-09-23	bradc001	bradfch01
bradfla01	1949	12	21	USA	IL	Chicago	1998	9	11	USA	GA	Atlanta	Larry	Bradford	Larry	200	73	R	L	1977-09-24	1981-09-25	bradl101	bradfla01
bradfvi01	1915	3	5	USA	TN	Brownsville	1994	6	10	USA	KY	Paris	Vic	Bradford	Henry Victor	190	74	R	R	1943-05-01	1943-05-14	bradv101	bradfvi01
bradlal01	1856	5	23	USA	PA	Brady's Bend	1937	2	5	USA	PA	Altoona	Al	Bradley	Albert Joseph	185	70			1884-05-21	1884-05-21	brada101	bradlal01
bradlar01	1992	8	10	USA	OK	Muskogee							Archie	Bradley	Archie N.	225	76	R	R	2015-04-11	2017-06-16	brada001	bradlar01
bradlbe01	1956	12	23	USA	GA	Athens							Bert	Bradley	Steven Bert	190	73	B	R	1983-09-03	1983-10-02	bradb101	bradlbe01
bradlbi01	1878	2	13	USA	OH	Cleveland	1954	3	11	USA	OH	Cleveland	Bill	Bradley	William Joseph	185	72	R	R	1899-08-26	1915-09-28	bradb102	bradlbi01
bradlfo01	1855	7	1	USA	MA	Medford	1900	3	31	USA	PA	Philadelphia	Foghorn	Bradley	George H.	175	72	R	R	1876-08-23	1876-10-21	bradf101	bradlfo01
bradlfr01	1920	7	31	USA	KS	Parsons	2012	4	24	USA	CA	Pico Rivera	Fred	Bradley	Fred Langdon	180	73	R	R	1948-05-01	1949-05-01	bradf102	bradlfr01
bradlge01	1852	7	13	USA	PA	Reading	1931	10	2	USA	PA	Philadelphia	George	Bradley	George Washington	175	70	R	R	1875-05-04	1888-08-08	bradg103	bradlge01
bradlge02	1914	4	1	USA	AR	Greenwood	1982	10	19	USA	TN	Lawrenceburg	George	Bradley	George Washington	185	73	R	R	1946-04-28	1946-05-13	bradg101	bradlge02
bradlhe01	1903	1	3	USA	KS	Agenda	1959	10	16	USA	KS	Clay Center	Herb	Bradley	Herbert Theodore	170	72	R	R	1927-05-09	1929-07-15	bradh102	bradlhe01
bradlhu01	1885	5	23	USA	MA	Grafton	1949	1	26	USA	MA	Worcester	Hugh	Bradley	Hugh Frederick	175	70	R	R	1910-04-25	1915-09-07	bradh101	bradlhu01
bradlja01	1893	9	20	USA	CO	Denver	1969	3	18	USA	OK	Tulsa	Jack	Bradley	John Thomas	175	71	R	R	1916-06-18	1916-07-31	bradj103	bradlja01
bradlja02	1990	4	19	USA	VA	Richmond							Jackie	Bradley	Jackie	200	70	L	R	2013-04-01	2017-06-16	bradj001	bradlja02
bradlje01	1990	6	12	USA	AL	Huntsville							Jed	Bradley	Jedidiah Custer	225	75	L	L	2016-09-03	2016-09-24	bradj002	bradlje01
bradlma01	1956	12	3	USA	KY	Elizabethtown							Mark	Bradley	Mark Allen	180	73	R	R	1981-09-03	1983-10-02	bradm101	bradlma01
bradlmi01	1978	4	15	USA	CA	Harbor City							Milton	Bradley	Milton Obelle	215	72	B	R	2000-07-19	2011-05-08	bradm001	bradlmi01
bradlph01	1959	3	11	USA	IN	Bloomington							Phil	Bradley	Philip Poole	185	72	R	R	1983-09-02	1990-09-29	bradp001	bradlph01
bradlry01	1975	10	26	USA	CA	Covina							Ryan	Bradley	Ryan J.	220	76	R	R	1998-08-22	1998-09-23	bradr001	bradlry01
bradlsc01	1960	3	22	USA	NJ	Glen Ridge							Scott	Bradley	Scott William	185	71	L	R	1984-09-09	1992-06-13	brads001	bradlsc01
bradlto01	1947	3	16	USA	NC	Asheville							Tom	Bradley	Thomas William	180	74	R	R	1969-09-09	1975-09-15	bradt102	bradlto01
bradsda01	1895	11	23	USA	IL	Wolf Creek	1939	12	11	USA	IL	Herrin	Dallas	Bradshaw	Dallas Carl	145	67	L	R	1917-06-05	1917-06-09	bradd101	bradsda01
bradsge01	1924	9	12	USA	NC	Salisbury	1994	11	4	USA	NC	Hendersonville	George	Bradshaw	George Thomas	185	74	R	R	1952-08-10	1952-09-19	bradg102	bradsge01
bradsjo01	1897	8	17	USA	TN	Ro Ellen	1985	1	31	USA	FL	Tavares	Joe	Bradshaw	Joseph Siah	200	74	R	R	1929-05-09	1929-05-13	bradj101	bradsjo01
bradste01	1969	2	3	USA	VA	Franklin							Terry	Bradshaw	Terry Leon	180	72	L	R	1995-05-04	1996-09-29	bradt001	bradste01
brady01	1854	12		USA	IL	Chicago							Spike	Brady	Michael Peter					1875-09-25	1875-09-25	bradu102	brady01
bradybi01	1889	8	18	USA	NY	New York	1956	4	10	USA	NY	Brooklyn	Bill	Brady	William Aloysius	180	73	R	R	1912-07-09	1912-07-09	bradb104	bradybi01
bradybo01	1922	11	8	USA	PA	Lewiston	1996	4	22	USA	CT	Manchester	Bob	Brady	Robert Jay	175	73	L	R	1946-08-24	1947-04-17	bradb103	bradybo01
bradybr01	1962	7	11	USA	NY	Elmhurst							Brian	Brady	Brian Phelan	185	71	L	L	1989-04-16	1989-04-22	bradb001	bradybr01
bradycl01	1897	3	6	USA	MO	St. Louis	1974	9	25	USA	IL	Belleville	Cliff	Brady	Clifford Francis	140	65	R	R	1920-08-08	1920-09-28	bradc101	bradycl01
bradydo01	1969	11	23	USA	IL	Jacksonville							Doug	Brady	Stephen Douglas	165	71	B	R	1995-09-05	1995-10-01	bradd001	bradydo01
bradyji01	1936	3	2	USA	NJ	Jersey City							Jim	Brady	James Joseph	185	74	L	L	1956-05-12	1956-08-02	bradj102	bradyji01
bradyki01	1881	5	28	USA	NJ	Elmer	1947	8	21	USA	NY	Albany	King	Brady	James Ward	190	72	R	R	1905-09-21	1912-04-13	bradk101	bradyki01
bradyne01	1897	3	4	USA	KY	Covington	1947	6	18	USA	KY	South Fort Mitchell	Neal	Brady	Cornelius Joseph	197	72	R	R	1915-09-25	1925-09-21	bradn101	bradyne01
bradyst01	1851	7	14	USA	MA	Worcester	1917	11	1	USA	CT	Hartford	Steve	Brady	Stephen A.	165	69			1874-07-23	1886-10-05	brads101	bradyst01
bragabo01	1917	10	30	USA	AL	Birmingham	2010	1	21	USA	TX	Fort Worth	Bobby	Bragan	Robert Randall	175	70	R	R	1940-04-16	1948-06-27	bragb101	bragabo01
braggda01	1969	9	7	USA	CT	Waterbury							Darren	Bragg	Darren William	180	69	L	R	1994-04-12	2004-10-03	bragd001	braggda01
braggdi01	1877	12	25	USA	PA	Mercer	1963	8	12	USA	FL	Babson Park	Dick	Braggins	Richard Realf	170	71	R	R	1901-05-16	1901-06-26	bragd101	braggdi01
bragggl01	1962	10	17	USA	CA	San Bernardino							Glenn	Braggs	Glenn Erick	210	75	R	R	1986-07-18	1992-09-10	bragg001	bragggl01
brainas01	1841			USA	NY	Albany	1888	12	29	USA	CO	Denver	Asa	Brainard	Asahel	150	68		R	1871-05-05	1874-10-14	braia102	brainas01
brainda01	1879	1	24	United Kingdom	Herefordshire	Hereford	1959	5	25	USA	CA	Los Angeles	Dave	Brain	David Leonard	170	70	R	R	1901-04-24	1908-10-07	braid101	brainda01
brainfr01	1892	2	17	USA	IL	Champaign	1959	4	17	USA	TX	Galveston	Fred	Brainard	Frederick F.	176	72	R	R	1914-10-06	1916-04-13	braif101	brainfr01
braital01	1892	2	15	USA	IL	Braceville	1960	11	24	USA	WV	Rowlesburg	Al	Braithwood	Alfred	145	73	R	L	1915-09-01	1915-10-02	braia101	braital01
brameer01	1901	10	12	USA	TN	Big Rock	1949	11	22	USA	KY	Hopkinsville	Erv	Brame	Ervin Beckham	190	74	L	R	1928-04-14	1932-09-23	brame101	brameer01
bramhar01	1909	2	22	USA	IL	Oak Park	1985	9	4	USA	WI	Madison	Art	Bramhall	Arthur Washington	170	71	R	R	1935-04-18	1935-04-26	brama101	bramhar01
brancal01	1919	5	29	USA	PA	Philadelphia	2012	6	14	USA	PA	Media	Al	Brancato	Albert	188	69	R	R	1939-09-07	1945-09-19	brana101	brancal01
brancha01	1939	2	8	USA	TN	Memphis							Harvey	Branch	Harvey Alfred	175	72	R	L	1962-09-18	1962-09-18	branh101	brancha01
brancno01	1915	3	22	USA	WA	Spokane	1971	11	21	USA	TX	Navasota	Norm	Branch	Norman Downs	200	75	R	R	1941-05-05	1942-08-20	brann101	brancno01
brancra01	1926	1	6	USA	NY	Mount Vernon	2016	11	23	USA	NY	Rye	Ralph	Branca	Ralph Theodore Joseph	220	75	R	R	1944-06-12	1956-09-07	branr103	brancra01
brancro01	1953	7	12	USA	MO	St. Louis							Roy	Branch	Roy	175	72	R	R	1979-09-11	1979-09-18	branr102	brancro01
brandbi01	1915	3	21	USA	IN	Aurora	1968	5	16	USA	IN	Fort Wayne	Bill	Brandt	William George	170	68	R	R	1941-09-20	1943-10-03	branb101	brandbi01
brandbu01	1940	7	8	USA	TX	Nacogdoches							Bucky	Brandon	Darrell G.	200	74	R	R	1966-04-19	1973-09-30	branb102	brandbu01
brandch01	1887	3	31	USA	KS	Coldwater	1958	10	7	USA	CA	Santa Ana	Chick	Brandom	Chester Milton	161	68	R	R	1908-09-03	1915-09-07	branc101	brandch01
branded01	1905	2	17	USA	WA	Spokane	1944	11	2	USA	WA	Spokane	Ed	Brandt	Edward Arthur	190	73	L	L	1928-04-15	1938-09-29	brane101	branded01
brandja01	1934	4	28	USA	NE	Omaha							Jackie	Brandt	John George	165	71	R	R	1956-04-21	1967-09-02	branj101	brandja01
brandma01	1970	7	14	USA	TX	Houston							Mark	Brandenburg	Mark Clay	180	72	R	R	1995-07-20	1997-09-27	branm002	brandma01
brandro01	1940	1	13	USA	CA	Los Angeles							Ron	Brand	Ronald George	167	67	R	R	1963-05-26	1971-09-25	branr101	brandro01
brannmi01	1851	10	25	USA	MA	Douglas	1881	10	7	USA	IL	Chicago	Mike	Brannock	Michael J.	162	68			1871-10-21	1875-08-28	branm102	brannmi01
brannot01	1899	3	13	USA	AR	Greenbrier	1967	6	6	USA	AR	Little Rock	Otis	Brannan	Otis Owen	160	69	L	R	1928-04-11	1929-10-05	brano101	brannot01
branodu01	1897	11	30	USA	TX	Sulphur Springs	1980	2	4	USA	AZ	Sun City	Dud	Branom	Edgar Dudley	190	73	L	L	1927-04-12	1927-05-31	brand101	branodu01
bransje01	1967	1	26	USA	MS	Waynesboro							Jeff	Branson	Jeffery Glenn	180	72	L	R	1992-04-12	2001-10-06	branj002	bransje01
branski01	1875	1	7	USA	MA	Worcester	1947	5	1	USA	MA	Worcester	Kitty	Bransfield	William Edward	207	71	R	R	1898-08-22	1911-09-14	brank101	branski01
brantcl01	1968	4	12	USA	NY	Staten Island							Cliff	Brantley	Clifford	190	74	R	R	1991-09-03	1992-09-28	branc001	brantcl01
brantje01	1963	9	5	USA	AL	Florence							Jeff	Brantley	Jeffrey Hoke	180	71	R	R	1988-08-05	2001-05-23	branj001	brantje01
brantma01	1955	9	17	USA	CA	Garberville							Marshall	Brant	Marshall Lee	185	77	R	R	1980-10-01	1983-07-11	branm101	brantma01
brantmi01	1961	6	17	USA	NY	Catskill							Mickey	Brantley	Michael Charles	180	70	R	R	1986-08-09	1989-06-01	branm001	brantmi01
brantmi02	1987	5	15	USA	WA	Bellevue							Michael	Brantley	Michael Charles	200	74	L	L	2009-09-01	2017-06-14	branm003	brantmi02
brantro01	1989	7	14	USA	CA	San Diego							Rob	Brantly	Robert Jacob	195	73	L	R	2012-08-14	2015-10-04	branr002	brantro01
branyru01	1975	12	19	USA	GA	Warner Robins							Russell	Branyan	Russell Oles	235	76	L	R	1998-09-26	2011-09-26	branr001	branyru01
brashki01	1877	8	27	USA	OH	Mansfield	1934	12	22	USA	CA	Los Angeles	Kitty	Brashear	Norman Cobb	205	71	R	R	1899-06-25	1899-07-30	brask101	brashki01
brashro01	1874	1	3	USA	OH	Ashtabula	1951	4	20	USA	CA	Los Angeles	Roy	Brashear	Roy Parks	190	71	R	R	1902-04-25	1903-05-23	brasr101	brashro01
brasiry01	1987	8	26	USA	TX	Wichita Falls							Ryan	Brasier	Ryan David	225	72	R	R	2013-05-02	2013-09-27	brasr001	brasiry01
bratcjo01	1898	7	22	USA	TX	Grand Saline	1977	10	13	USA	TX	Fort Worth	Joe	Bratcher	Joseph Warwick	140	68	L	R	1924-08-26	1924-08-29	bratj101	bratcjo01
bratsfr01	1892	1	16	USA	OH	Alliance	1962	1	10	USA	OH	Massillon	Fred	Bratschi	Frederick Oscar	170	70	R	R	1921-07-24	1927-04-12	bratf101	bratsfr01
braulst01	1992	4	29	USA	CA	La Mesa							Steven	Brault	Steven Joseph	200	72	L	L	2016-07-05	2016-09-26	braus002	braulst01
braunjo01	1939	12	26	USA	WI	Madison	2011	6	10	USA	CA	Oceanside	John	Braun	John Paul	218	77	R	R	1964-10-02	1964-10-02	brauj101	braunjo01
braunry01	1980	7	29	CAN	ON	Kitchener							Ryan	Braun	Ryan Zachary	220	73	R	R	2006-09-02	2007-09-25	braur001	braunry01
braunry02	1983	11	17	USA	CA	Mission Hills							Ryan	Braun	Ryan Joseph	205	74	R	R	2007-05-25	2017-05-25	braur002	braunry02
braunst01	1948	5	8	USA	NJ	Trenton							Steve	Braun	Stephen Russell	180	70	L	R	1971-04-06	1985-10-06	braus001	braunst01
bravoan01	1942	8	4	Venezuela	Zulia	Maracaibo							Angel	Bravo	Angel Alfonso	150	68	L	L	1969-06-06	1971-09-04	brava101	bravoan01
braxtga01	1900	6	10	USA	NC	Snow Camp	1966	2	26	USA	VA	Norfolk	Garland	Braxton	Edgar Garland	152	71	B	L	1921-05-27	1933-09-23	braxg101	braxtga01
braybi01	1983	6	5	USA	VA	Virginia Beach							Bill	Bray	William Paul	215	75	L	L	2006-06-03	2012-07-30	brayb001	braybi01
braybu01	1913	4	1	USA	AL	Birmingham	1982	9	4	USA	IN	Evansville	Buster	Bray	Clarence Wilbur	170	72	L	L	1941-04-18	1941-05-07	brayb101	braybu01
brazecr01	1980	5	10	USA	AL	Montgomery							Craig	Brazell	Craig Walter	210	75	L	R	2004-08-17	2007-09-30	brazc001	brazecr01
brazede01	1980	6	16	USA	TN	Tullahoma							Dewon	Brazelton	Dewon Cortez	215	76	R	R	2002-09-13	2006-05-11	brazd001	brazede01
brazifr01	1899	8	11	USA	PA	Spangler	1976	11	3	USA	CA	Oakland	Frank	Brazill	Frank Leo	175	71	L	R	1921-04-13	1922-05-05	brazf101	brazifr01
brazlal01	1913	10	19	USA	OK	Loyal	1973	10	24	USA	CO	Grand Junction	Al	Brazle	Alpha Eugene	185	74	L	L	1943-07-25	1954-09-24	braza101	brazlal01
brazoyh01	1980	6	11	D.R.	Distrito Nacional	Santo Domingo							Yhency	Brazoban	Yhency Jose	250	73	R	R	2004-08-05	2011-07-19	brazy001	brazoyh01
breale01	1973	10	12	D.R.	San Pedro de Macoris	San Pedro de Macoris							Leslie	Brea	Lesli Guillermo	170	70	R	R	2000-08-13	2001-06-16	breal001	breale01
breamsi01	1960	8	3	USA	PA	Carlisle							Sid	Bream	Sidney Eugene	215	76	L	L	1983-09-01	1994-07-27	breas001	breamsi01
breazji01	1949	10	3	USA	TX	Houston							Jim	Breazeale	James Leo	210	74	L	R	1969-09-13	1978-07-19	breaj101	breazji01
brebbjo01	1990	5	30	USA	MA	Sharon							John	Brebbia	John Fulboam	185	73	L	R	2017-05-28	2017-06-15		brebbjo01
brechha01	1914	10	14	USA	OK	Broken Bow	2004	1	17	USA	OK	Bethany	Harry	Brecheen	Harry David	160	70	L	L	1940-04-22	1953-09-13	brech101	brechha01
breckbi01	1907	10	16	USA	OK	Tulsa	1958	8	23	USA	OK	Tulsa	Bill	Breckinridge	William Robertson	175	71	R	R	1929-06-30	1929-09-21	brecb101	breckbi01
bredebr01	1971	9	13	USA	IL	Belleville							Brent	Brede	Brent David	190	76	L	L	1996-09-08	1998-09-27	bredb001	bredebr01
breedda01	1942	6	27	USA	GA	Albany							Danny	Breeden	Danny Richard	185	71	R	R	1969-07-24	1971-06-17	breed101	breedda01
breedha01	1944	6	28	USA	GA	Albany							Hal	Breeden	Harold Noel	200	74	R	L	1971-04-07	1975-09-11	breeh101	breedha01
breedma01	1934	3	8	USA	AL	Decatur	2006	12	31	USA	AL	Decatur	Marv	Breeding	Marvin Eugene	175	72	R	R	1960-04-19	1963-09-29	breem101	breedma01
bregmal01	1994	3	30	USA	NM	Albuquerque							Alex	Bregman	Alexander David	180	72	R	R	2016-07-25	2017-06-16	brega001	bregmal01
breinfr01	1955	11	15	USA	CA	San Francisco							Fred	Breining	Fred Lawrence	185	76	R	R	1980-09-04	1984-05-06	breif001	breinfr01
breital01	1857	11	9	USA	NY	Utica	1932	6	19	USA	NY	Utica	Alonzo	Breitenstein	Alonzo					1883-07-07	1883-07-07	breia101	breital01
breitte01	1869	6	1	USA	MO	St. Louis	1935	5	3	USA	MO	St. Louis	Ted	Breitenstein	Theodore J.	167	69	L	L	1891-04-28	1901-05-09	breit101	breitte01
bremehe01	1913	10	25	USA	IL	Chicago	1979	11	28	USA	GA	Columbus	Herb	Bremer	Herbert Frederick	195	72	R	R	1937-09-16	1939-09-06	bremh101	bremehe01
brenesa01	1890	9	1	USA	WI	Galesville	1956	4	20	USA	WI	Galesville	Sam	Brenegan	Olaf Selmar	185	74	L	R	1914-04-24	1914-04-24	brens101	brenesa01
brenlbo01	1954	2	25	USA	OH	Coshocton							Bob	Brenly	Robert Earl	210	74	R	R	1981-08-14	1989-10-01	brenb001	brenlbo01
brennad01	1887	7	18	USA	KS	La Harpe	1962	1	7	USA	MO	Kansas City	Ad	Brennan	Addison Foster	170	71	L	L	1910-05-19	1918-07-27	brena101	brennad01
brennbe01	1887	7	18	USA	MN	Minneapolis	1971	4	11	USA	MN	St. Louis Park	Bert	Brenner	Delbert Henry	175	72	R	R	1912-09-21	1912-10-05	brenb102	brennbe01
brenndo01	1903	12	2	USA	ME	Augusta	1953	4	26	USA	MA	Boston	Don	Brennan	James Donald	210	72	R	R	1933-04-16	1937-09-29	brend101	brenndo01
brennji01	1863	9	15	USA	MO	St. Louis	1914	3	24	USA	MO	Koch	Jack	Brennan	Jack	155				1884-04-20	1890-10-04	brenj102	brennji01
brennji02	1941	2	13	USA	CA	San Diego	1994	3	10	USA	MS	Pearl	Jim	Brenneman	James Leroy	180	74	R	R	1965-07-09	1965-07-23	brenj101	brennji02
brennto01	1952	10	30	USA	IL	Chicago							Tom	Brennan	Thomas Martin	180	73	R	R	1981-09-05	1985-05-27	brent001	brennto01
brennwi01	1963	1	15	USA	FL	Tampa							William	Brennan	William Raymond	200	75	R	R	1988-07-19	1993-10-02	brenw001	brennwi01
brentbr01	1988	12	30	USA	TN	Crossville							Bryce	Brentz	Bryce Everett	210	72	R	R	2014-09-17	2016-08-10	brenb002	brentbr01
brently01	1889	10	7	USA	IL	Peoria	1968	10	14	USA	CA	Los Angeles	Lynn	Brenton	Lynn Davis	165	70	R	R	1913-08-10	1921-07-04	brenl101	brently01
brenzbi01	1910	3	3	USA	CA	Oakland	1979	6	12	USA	CA	Oakland	Bill	Brenzel	William Richard	173	70	R	R	1932-04-13	1935-09-28	brenb101	brenzbi01
breslcr01	1980	8	8	USA	CT	New Haven							Craig	Breslow	Craig Andrew	190	72	L	L	2005-07-23	2017-06-16	bresc001	breslcr01
bresnro01	1879	6	11	USA	OH	Toledo	1944	12	4	USA	OH	Toledo	Roger	Bresnahan	Roger Philip	200	69	R	R	1897-08-27	1915-10-03	bresr102	bresnro01
bressed01	1932	5	2	USA	CA	Los Angeles							Eddie	Bressoud	Edward Francis	175	73	R	R	1956-06-14	1967-09-26	brese101	bressed01
bressru01	1894	10	23	USA	PA	Coder	1966	11	7	USA	OH	Mount Washington	Rube	Bressler	Raymond Bloom	187	72	R	L	1914-04-24	1932-07-18	bresr101	bressru01
bretoji01	1891	7	15	USA	IL	Chicago	1973	5	30	USA	WI	Beloit	Jim	Breton	John Frederick	178	70	R	R	1913-08-25	1915-07-17	bretj101	bretoji01
brettge01	1953	5	15	USA	WV	Glen Dale							George	Brett	George Howard	185	72	L	R	1973-08-02	1993-10-03	bretg001	brettge01
bretthe01	1900	5	23	USA	VA	Lawrenceville	1974	11	25	USA	FL	St. Petersburg	Duke	Brett	Herbert James	175	72	R	R	1924-08-08	1925-08-05	bretd101	bretthe01
brettke01	1948	9	18	USA	NY	Brooklyn	2003	11	18	USA	WA	Spokane	Ken	Brett	Kenneth Alven	190	72	L	L	1967-09-27	1981-10-03	bretk101	brettke01
brettry01	1991	10	9	USA	WA	Seattle							Ryan	Brett	Ryan Duane	180	69	B	R	2015-04-18	2015-04-21	bretr001	brettry01
breuema01	1914	4	29	USA	MO	Rolla	1991	1	17	USA	MO	Rolla	Marv	Breuer	Marvin Howard	185	74	R	R	1939-05-04	1943-09-28	breum101	breuema01
brewebi01	1968	4	15	USA	TX	Fort Worth							Billy	Brewer	William Robert	175	73	L	L	1993-04-08	1999-10-02	brewb001	brewebi01
brewech01	1988	4	7	USA	AZ	Paradise Valley							Charles	Brewer	Charles Robert	210	75	R	R	2013-06-10	2013-07-08	brewc001	brewech01
breweja01	1918	4	21	USA	CA	Los Angeles	2003	11	30	USA	CA	Sun City	Jack	Brewer	Jack Herndon	170	74	R	R	1944-07-15	1946-04-18	brewj101	breweja01
breweji01	1937	11	14	USA	CA	Merced	1987	11	16	USA	TX	Tyler	Jim	Brewer	James Thomas	186	73	L	L	1960-07-17	1976-05-24	brewj102	breweji01
brewemi01	1959	10	24	USA	LA	Shreveport							Mike	Brewer	Michael Quinn	190	77	R	R	1986-06-11	1986-07-02	brewm001	brewemi01
brewero01	1966	2	24	USA	FL	Eustis							Rod	Brewer	Rodney Lee	210	75	L	L	1990-09-05	1993-10-03	brewr001	brewero01
breweto01	1931	9	3	USA	NC	Wadesboro							Tom	Brewer	Thomas Austin	175	73	R	R	1954-04-18	1961-09-27	brewt101	breweto01
breweto02	1957	11	25	USA	LA	Coushatta							Tony	Brewer	Anthony Bruce	190	71	R	R	1984-08-01	1984-09-30	brewt001	breweto02
brewija01	1971	9	28	USA	NC	Greenville							Jamie	Brewington	Jamie Chancellor	180	76	R	R	1995-07-24	2000-09-24	brewj001	brewija01
brewsch01	1916	12	27	USA	LA	Marthaville	2000	10	1	USA	GA	Alma	Charlie	Brewster	Charles Lawrence	175	68	R	R	1943-05-02	1946-05-29	brewc101	brewsch01
briceal01	1937	10	1	USA	NY	New York	2016	7	30	USA	FL	Bradenton	Alan	Brice	Alan Healey	215	77	R	R	1961-09-22	1961-09-27	brica101	briceal01
briceau01	1992	6	19	Hong Kong		Hong Kong							Austin	Brice	Austin Robert	235	76	R	R	2016-08-12	2017-06-12	brica001	briceau01
brickfr01	1906	11	9	USA	KS	Saffordville	1961	4	8	USA	KS	Wichita	Fred	Brickell	George Frederick	160	67	L	R	1926-08-19	1933-05-01	bricf101	brickfr01
brickfr02	1935	3	19	USA	KS	Wichita	1965	10	15	USA	KS	Wichita	Fritz	Brickell	Fritz Darrell	157	65	R	R	1958-04-30	1961-05-15	bricf102	brickfr02
brickge01	1894	7	19	USA	MA	Everett	1947	2	23	USA	MA	Everett	George	Brickley	George Vincent	180	69	R	R	1913-09-26	1913-10-01	bricg101	brickge01
brickra01	1925	5	2	USA	OH	Cincinnati	1994	5	9	USA	OH	Bridgetown	Ralph	Brickner	Ralph Harold	215	75	R	R	1952-05-04	1952-09-17	bricr101	brickra01
brideji01	1927	2	13	USA	OH	Lancaster	1989	8	25	USA	CA	El Toro	Jim	Brideweser	James Ehrenfeld	165	72	R	R	1951-09-29	1957-09-21	bridj101	brideji01
bridgma01	1931	6	2	USA	MS	Jackson	1990	9	3	USA	MS	Jackson	Marshall	Bridges	Marshall	165	73	B	L	1959-06-17	1965-09-25	bridm101	bridgma01
bridgro01	1927	8	7	USA	TX	Refugio	2015	1	28	USA	ID	Coeur d'Alene	Rocky	Bridges	Everett Lamar	170	68	R	R	1951-04-17	1961-10-01	bridr101	bridgro01
bridgto01	1906	12	28	USA	TN	Gordonsville	1968	4	19	USA	TN	Nashville	Tommy	Bridges	Thomas Jefferson Davis	155	70	R	R	1930-08-13	1946-07-20	bridt101	bridgto01
bridwal01	1884	1	4	USA	OH	Friendship	1969	1	23	USA	OH	Portsmouth	Al	Bridwell	Albert Henry	170	69	L	R	1905-04-16	1915-09-23	brida101	bridwal01
bridwpa01	1991	8	2	USA	TX	Hereford							Parker	Bridwell	Parker Alan	185	76	R	R	2016-08-21	2017-06-14	bridp001	bridwpa01
briefbu01	1892	7	3	USA	MI	Remus	1963	2	11	USA	WI	Milwaukee	Bunny	Brief	Anthony Vincent	185	72	R	R	1912-09-22	1917-06-24	brieb101	briefbu01
briggbu01	1875	7	8	USA	NY	Poughkeepsie	1911	2	18	USA	OH	Cleveland	Buttons	Briggs	Herbert Theodore	180	73	R	R	1896-04-23	1905-09-25	brigb101	briggbu01
briggch01	1860	9		USA	IL	Batavia	1920	3	10	USA	WA	Seattle	Charlie	Briggs	Charles R.	170	67			1884-05-02	1884-08-05	brigc101	briggch01
briggda01	1952	11	18	USA	CA	Scotia							Dan	Briggs	Dan Lee	180	72	L	L	1975-09-10	1982-07-03	brigd101	briggda01
brigggr01	1865	3	16	USA	PA	Pittsburgh	1928	5	31	USA	PA	Pittsburgh	Grant	Briggs	Grant	170	71			1890-04-17	1895-06-22	brigg101	brigggr01
briggjo01	1934	1	24	USA	CA	Natoma							John	Briggs	Jonathan Tift	175	70	R	R	1956-04-17	1960-09-04	brigj101	briggjo01
briggjo02	1944	3	10	USA	NJ	Paterson							John	Briggs	John Edward	190	73	L	L	1964-04-17	1975-09-28	brigj102	briggjo02
brighha01	1929	9	22	USA	MO	Kansas City	2000	3	13	USA	CA	Sacramento	Harry	Bright	Harry James	190	72	R	R	1958-07-25	1965-06-30	brigh101	brighha01
brighja01	1988	2	10	USA	FL	Winter Garden							Jake	Brigham	Jacob Daniel	210	75	R	R	2015-06-30	2015-08-30	brigj001	brighja01
brignre01	1986	1	16	USA	LA	St. Amant							Reid	Brignac	Reid Michael	210	75	B	R	2008-07-04	2016-05-26	brigr001	brignre01
brilegr01	1965	5	24	USA	NC	Greenville							Greg	Briley	Gregory	175	69	L	R	1988-06-27	1993-09-24	brilg001	brilegr01
brilene01	1943	8	5	USA	CA	Dorris	2005	2	13	USA	FL	Orlando	Nelson	Briles	Nelson Kelley	195	71	R	R	1965-04-19	1978-09-13	briln101	brilene01
brillfr01	1864	3	28	USA	NY	Astoria	1944	11	19	USA	NY	Flushing	Frank	Brill	Francis Hasbrouck	155	68	R	R	1884-06-23	1884-08-08	brilf101	brillfr01
brillji01	1903	9	28	USA	VA	Dublin	1972	9	2	USA	VA	Radford	Jim	Brillheart	James Benson	170	71	R	L	1922-04-17	1931-06-03	brilj101	brillji01
brinkbi01	1883	8	30	USA	MO	Warrensburg	1965	2	5	USA	CA	Arcadia	Bill	Brinker	William Hutchinson	190	73	B	R	1912-04-24	1912-05-27	brinb101	brinkbi01
brinkbr01	1965	1	20	USA	CA	Roseville							Brad	Brink	Bradford Albert	195	74	R	R	1992-05-17	1994-07-19	brinb001	brinkbr01
brinkch01	1944	9	16	USA	OH	Cincinnati							Chuck	Brinkman	Charles Ernest	185	73	R	R	1969-07-10	1974-08-04	brinc101	brinkch01
brinked01	1941	12	8	USA	OH	Cincinnati	2008	9	30	USA	OH	Cincinnati	Ed	Brinkman	Edwin Albert	170	72	R	R	1961-09-06	1975-09-28	brine101	brinked01
brinkle01	1926	10	20	USA	MO	Cape Girardeau	1998	7	2	USA	MO	Cape Girardeau	Leon	Brinkopf	Leon Clarence	185	71	R	R	1952-04-18	1952-05-05	brinl101	brinkle01
brinsle01	1994	5	8	USA	FL	Fort Lauderdale							Lewis	Brinson	Lewis Lamont	195	75	R	R	2017-06-11	2017-06-16
briodfa01	1858	8	13	USA	NY	Lansingburgh	1903	6	22	USA	IL	Chicago	Fatty	Briody	Charles F.	190	68		R	1880-06-16	1888-07-24	briof101	briodfa01
briscjo01	1967	9	22	USA	IL	La Grange							John	Briscoe	John Eric	185	75	R	R	1991-04-18	1996-05-21	brisj001	briscjo01
brisslo01	1924	6	5	USA	SC	Anderson	2013	11	25	USA	SC	Augusta	Lou	Brissie	Leland Victor	210	76	L	L	1947-09-28	1953-09-01	brisl101	brisslo01
bristda99	1933	6	23	USA	GA	Bristol							Dave	Bristol	James David	175	71	R	R			brisd801	bristda99
bristge01	1870	5	13	USA	IL	Paw Paw	1939	10	17	USA	WA	Bellingham	George	Bristow	George Gates	170	70	R	R	1899-04-15	1899-05-08	brisg101	bristge01
britobe01	1963	12	4	D.R.	San Cristobal	San Cristobal							Bernardo	Brito	Bernardo	190	73	R	R	1992-09-15	1995-06-24	britb001	britobe01
britoeu01	1978	8	19	D.R.	Hato Mayor	Sabana de la Mar							Eude	Brito	Eude Ezequiel	170	72	L	L	2005-08-21	2006-09-18	brite001	britoeu01
britojo01	1966	6	22	D.R.	Santiago Rodriguez	Moncion							Jorge	Brito	Jorge Manuel	190	73	R	R	1995-04-30	1996-04-21	britj001	britojo01
britoju01	1979	11	7	D.R.	Santiago Rodriguez	Moncion							Juan	Brito	Juan Ramon	205	71	R	R	2002-05-03	2004-10-03	britj002	britoju01
britoso01	1992	9	6	D.R.	Azua	Azua							Socrates	Brito	Socrates Orel	205	74	L	L	2015-09-08	2016-10-02	brits001	britoso01
britoti01	1972	5	28	D.R.	Distrito Nacional	Santo Domingo							Tilson	Brito	Tilson Manuel	170	72	R	R	1996-04-01	1997-09-28	britt001	britoti01
brittch01	1982	12	16	USA	FL	Hollywood							Chris	Britton	Christopher Daniel	275	75	R	R	2006-04-12	2008-09-26	britc001	brittch01
brittdr01	1989	5	22	USA	TX	Waco							Drake	Britton	John Drake	215	74	L	L	2013-07-20	2014-09-28	britd001	brittdr01
brittgi01	1891	9	21	USA	KS	Parsons	1983	6	20	USA	KS	Parsons	Gil	Britton	Stephen Gilbert	160	70	R	R	1913-09-20	1913-09-23	britg101	brittgi01
brittgu01	1909	11	29	USA	NC	Wilmington	1974	2	16	USA	NC	Wilmington	Gus	Brittain	August Schuster	192	70	R	R	1937-07-22	1937-09-15	britg102	brittgu01
brittja01	1924	3	4	USA	IL	Athens	1994	1	5	USA	IL	Springfield	Jack	Brittin	John Albert	175	71	R	R	1950-09-15	1951-05-13	britj102	brittja01
brittji01	1856	2	25	USA	NY	Brooklyn	1923	2	28	USA	CA	San Francisco	Jim	Britt	James Edward		66			1872-05-02	1873-11-01	britj103	brittji01
brittji02	1944	3	25	USA	NY	North Tonawanda							Jim	Britton	James Allan	225	77	R	R	1967-09-20	1971-09-25	britj101	brittji02
brittza01	1987	12	22	USA	CA	Panorama City							Zach	Britton	Zachary Grant	195	75	L	L	2011-04-03	2017-05-04	britz001	brittza01
brizzto01	1957	1	14	USA	CA	Santa Monica							Tony	Brizzolara	Anthony John	215	77	R	R	1979-05-19	1984-09-28	brizt001	brizzto01
broacjo01	1909	10	3	USA	MA	Lawrence	1985	5	16	USA	MA	Lawrence	Johnny	Broaca	John Joseph	190	71	R	R	1934-06-02	1939-09-23	broaj101	broacjo01
broadla01	1983	8	20	USA	TX	Bryan							Lance	Broadway	Lance Daniel	210	74	R	R	2007-09-07	2009-09-26	broal001	broadla01
broadmi01	1987	3	30	USA	KY	Paducah							Mike	Broadway	Michael Allen	215	77	R	R	2015-06-13	2016-04-29	broam001	broadmi01
brobepe01	1950	3	2	USA	FL	West Palm Beach							Pete	Broberg	Peter Sven	205	75	R	R	1971-06-20	1978-10-01	brobp101	brobepe01
brocado01	1967	5	16	USA	PA	Clearfield							Doug	Brocail	Douglas Keith	220	77	L	R	1992-09-08	2009-10-02	brocd001	brocado01
brockch01	1970	2	5	USA	FL	Orlando							Chris	Brock	Terrence Christopher	175	72	R	R	1997-06-11	2002-09-28	brocc001	brockch01
brockgr01	1957	6	14	USA	OR	McMinnville							Greg	Brock	Gregory Allen	200	75	L	R	1982-09-01	1991-06-28	brocg001	brockgr01
brockjo01	1896	10	16	USA	IL	Hamilton	1951	10	27	USA	MO	Clayton	John	Brock	John Roy	165	66	R	R	1917-08-10	1918-09-02	brocj101	brockjo01
brockle01	1880	7	23	USA	IL	Brownsville	1960	9	19	USA	IL	Norris City	Lew	Brockett	Lewis Albert	168	70	R	R	1907-04-25	1911-07-26	brocl101	brockle01
brocklo01	1939	6	18	USA	AR	El Dorado							Lou	Brock	Louis Clark	170	71	L	L	1961-09-10	1979-09-30	brocl102	brocklo01
brockta01	1973	12	25	USA	CA	Goleta							Tarrik	Brock	Tarrik Jumaan	170	75	L	L	2000-03-29	2000-04-22	broct001	brockta01
brodebr01	1986	9	1	USA	AZ	Phoenix							Brian	Broderick	Brian Michael	205	78	R	R	2011-04-03	2011-05-13	brodb001	brodebr01
brodema01	1877	12	1	USA	PA	Lattimer	1940	2	26	USA	PA	Freeland	Matt	Broderick	Matthew Thomas	135	66	R	R	1903-05-01	1903-05-06	brodm101	brodema01
brodist01	1868	9	11	USA	VA	Warrenton	1935	10	30	USA	MD	Baltimore	Steve	Brodie	Walter Scott	180	71	L	R	1890-04-21	1902-10-04	brods101	brodist01
brododi01	1932	7	26	USA	NJ	Bayonne							Dick	Brodowski	Richard Stanley	182	73	R	R	1952-06-15	1959-07-04	brodd101	brododi01
brogler01	1935	8	27	USA	CA	Berkeley							Ernie	Broglio	Ernest Gilbert	200	74	R	R	1959-04-11	1966-07-02	broge101	brogler01
brognri01	1970	4	18	USA	MA	Turners Falls							Rico	Brogna	Rico Joseph	205	74	L	L	1992-08-08	2001-07-16	brogr001	brognri01
brohaja01	1950	2	26	USA	CA	Maywood							Jack	Brohamer	John Anthony	165	70	L	R	1972-04-18	1980-09-28	brohj101	brohaja01
brohatr01	1973	1	14	USA	MD	Cambridge							Troy	Brohawn	Michael Troy	190	73	L	L	2001-04-14	2003-05-12	broht001	brohatr01
brondke01	1921	10	17	USA	NE	Bradshaw	2004	10	3	USA	CA	Van Nuys	Ken	Brondell	Kenneth Leroy	195	73	R	R	1944-05-03	1944-10-01	bronk101	brondke01
bronkhe01	1885	3	30	USA	CT	South Manchester	1968	5	27	USA	CT	Somers	Herman	Bronkie	Herman Charles	165	69	R	R	1910-09-20	1922-08-15	bronh101	bronkhe01
bronkje01	1965	9	18	Afghanistan		Kabul							Jeff	Bronkey	Jacob Jeffery	215	75	R	R	1993-05-02	1995-08-12	bronj001	bronkje01
bronsji01	1936	6	22	USA	TX	Fort Worth							Jim	Bronstad	James Warren	196	75	R	R	1959-06-07	1964-10-04	bronj101	bronsji01
brookaa01	1990	4	27	USA	CA	Montclair							Aaron	Brooks	Aaron Lee	225	76	R	R	2014-05-03	2015-10-02	brooa001	brookaa01
brookbo01	1945	11	1	USA	CA	Los Angeles	1994	10	11	USA	CA	Harbor City	Bobby	Brooks	Robert	165	68	R	R	1969-09-01	1973-06-05	broob101	brookbo01
brookfr01	1978	9	6	USA	NY	Brooklyn							Frank	Brooks	Frank J.	190	73	L	L	2004-08-27	2005-05-16	broof001	brookfr01
brookha01	1862	4	19	USA	NJ	Hamburg	1922	4	19	USA	NY	Schenectady	Fred	Mauer	Frederick H.					1886-07-24	1886-07-24	brooh101	brookha01
brookhu01	1956	9	24	USA	CA	Los Angeles							Hubie	Brooks	Hubert	178	72	R	R	1980-09-04	1994-07-02	brooh001	brookhu01
brookik01	1949	1	3	USA	PA	Chambersburg							Ike	Brookens	Edward Dwain	170	77	R	R	1975-06-17	1975-06-25	brooi101	brookik01
brookje01	1967	3	23	USA	NY	Syracuse							Jerry	Brooks	Jerome Edward	195	72	R	R	1993-09-06	1996-09-28	brooj001	brookje01
brookma01	1897	8	18	USA	WI	Milwaukee	1976	12	6	USA	WI	Fort Atkinson	Mandy	Brooks	Jonathan	165	69	R	R	1925-05-30	1926-06-22	broom101	brookma01
brookto01	1953	8	10	USA	PA	Chambersburg							Tom	Brookens	Thomas Dale	165	70	R	R	1979-07-10	1990-09-30	broot001	brookto01
brosisc01	1966	8	15	USA	OR	Hillsboro							Scott	Brosius	Scott David	200	73	R	R	1991-08-07	2001-10-06	bross001	brosisc01
brosksi01	1911	3	23	USA	PA	Iselin	1975	5	17	USA	OH	Canton	Sig	Broskie	Sigmund Theodore	200	71	R	R	1940-09-11	1940-09-29	bross101	brosksi01
brosnji01	1929	10	24	USA	OH	Cincinnati	2014	6	28	USA	IL	Park Ridge	Jim	Brosnan	James Patrick	197	76	R	R	1954-04-15	1963-09-21	brosj101	brosnji01
brossfr01	1944	7	31	USA	ND	Drayton							Frank	Brosseau	Franklin Lee	180	73	R	R	1969-09-10	1971-06-13	brosf101	brossfr01
brosste01	1966	3	30	USA	TX	El Paso							Terry	Bross	Terrance Paul	234	81	R	R	1991-09-04	1993-09-14	brost001	brosste01
brothre01	1987	12	18	USA	TN	Murfreesboro							Rex	Brothers	Rex Colman	210	72	L	L	2011-06-06	2015-10-04	brotr001	brothre01
brottto01	1891	4	30	USA	MN	Halstad	1929	8	5	USA	IL	Chicago	Tony	Brottem	Anton Christian	176	72	R	R	1916-04-17	1921-09-29	brott101	brottto01
brougca01	1860	12	28	USA	WI	Magnolia	1939	3	15	USA	WI	Evansville	Cal	Broughton	Cecil Calvert	180	70	R	R	1883-05-02	1888-04-21	brouc101	brougca01
brouhma01	1956	5	22	USA	CA	Burbank							Mark	Brouhard	Mark Steven	210	73	R	R	1980-04-12	1985-10-06	broum001	brouhma01
brousbe01	1976	9	24	USA	TX	Beaumont							Ben	Broussard	Benjamin Isaac	220	74	L	L	2002-06-22	2008-05-02	broub001	brousbe01
broutar01	1882	11	25	USA	AL	Montgomery	1959	9	28	USA	SC	Charleston	Art	Brouthers	Arthur Henry		73	R	R	1906-04-14	1906-06-23	broua101	broutar01
broutda01	1858	5	8	USA	NY	Sylvan Lake	1932	8	2	USA	NJ	East Orange	Dan	Brouthers	Dennis Joseph	207	74	L	L	1879-06-23	1904-10-04	broud101	broutda01
brovijo01	1922	2	18	USA	CA	Davenport	1994	8	15	USA	CA	Santa Cruz	Joe	Brovia	Joseph John	195	75	L	R	1955-07-03	1955-08-05	brovj101	brovijo01
browebo01	1960	1	10	USA	NY	Jamaica							Bob	Brower	Robert Richard	185	71	R	R	1986-09-03	1989-05-30	browb002	browebo01
browefr01	1893	3	26	USA	VA	Cartharpin	1960	11	20	USA	MD	Baltimore	Frank	Brower	Frank Willard	180	74	L	R	1920-08-14	1924-09-24	browf102	browefr01
broweji01	1972	12	29	USA	MN	Edina							Jim	Brower	James Robert	205	74	R	R	1999-09-05	2007-08-14	browj003	broweji01
browelo01	1900	7	1	USA	OH	Cleveland	1994	3	4	USA	TX	Tyler	Louis	Brower	Louis Lester	155	70	R	R	1931-06-13	1931-07-27	browl106	browelo01
brown01													Robert	Brown	Robert					1874-07-29	1874-08-31	browu101	brown01
brownad01	1974	2	7	USA	MS	McComb							Adrian	Brown	Adrian Demond	175	72	B	R	1997-05-16	2006-05-23	browa001	brownad01
brownal01	1925	4	16	USA	VA	Norfolk	2016	1	10	USA	VA	Virginia Beach	Alton	Brown	Alton Leo	195	74	R	R	1951-04-21	1951-05-27	browa101	brownal01
brownan01	1981	2	17	USA	OH	Chardon							Andrew	Brown	Andrew Aaron	230	78	R	R	2006-08-13	2008-07-25	browa002	brownan01
brownan02	1984	9	10	USA	TX	Dallas							Andrew	Brown	Andrew Marshall	200	72	R	R	2011-06-12	2014-06-15	browa003	brownan02
brownba01	1984	12	28	USA	GA	Brunswick							Barret	Browning	Gary Barret	230	74	L	L	2012-06-30	2012-08-23	browb004	brownba01
brownbi01	1893	7	8	USA	TX	Coleman	1965	5	13	USA	TX	Lubbock	Bill	Brown	William Verna	185	68	L	L	1912-08-15	1912-09-13	browb104	brownbi01
brownbo01	1889	2	20	USA	NJ	Woodbury	1977	2	8	USA	NJ	Burlington	Boardwalk	Brown	Carroll William	178	73	R	R	1911-09-27	1915-10-07	browb103	brownbo01
brownbo02	1911	4	1	USA	MA	Dorchester	1990	8	3	USA	MA	Pembroke	Bob	Brown	Robert Murray	190	72	R	R	1930-04-21	1936-05-03	browb106	brownbo02
brownbo03	1924	10	25	USA	WA	Seattle							Bobby	Brown	Robert William	180	73	L	R	1946-09-22	1954-06-30	browb105	brownbo03
brownbo04	1954	5	25	USA	VA	Norfolk							Bobby	Brown	Rogers Lee	190	74	B	R	1979-04-05	1985-10-05	browb001	brownbo04
[truncated: 17,215 more rows]
