# Supplementary material for: Ten quick tips for getting the most scientific value out of numerical data
Source: PLoS Comput Biol. 2018 Oct 11;14(10):e1006141. doi: 10.1371/journal.pcbi.1006141 (PMC6181270; doi:10.1371/journal.pcbi.1006141)
Supplement: S3 Data — This archive contains selected tables of the Lahman Baseball Database [41] (in comma-separated values format) by Sean Lahman, licensed under a Creative Commons Attribution-ShareAlike 3.0 Unported License [42], and our Python code implementing the calculations described in Supporting Information S1 Text. (TGZ) [file pcbi.1006141.s004.tgz › pValueHackingExample/data/Pitching.csv]

playerID	yearID	stint	teamID	lgID	W	L	G	GS	CG	SHO	SV	IPouts	H	ER	HR	BB	SO	BAOpp	ERA	IBB	WP	HBP	BK	BFP	GF	R	SH	SF	GIDP
bechtge01	1871	1	PH1	NA	1	2	3	3	2	0	0	78	43	23	0	11	1		7.96				0			42
brainas01	1871	1	WS3	NA	12	15	30	30	30	0	0	792	361	132	4	37	13		4.5				0			292
fergubo01	1871	1	NY2	NA	0	0	1	0	0	0	0	3	8	3	0	0	0		27				0			9
fishech01	1871	1	RC1	NA	4	16	24	24	22	1	0	639	295	103	3	31	15		4.35				0			257
fleetfr01	1871	1	NY2	NA	0	1	1	1	1	0	0	27	20	10	0	3	0		10				0			21
flowedi01	1871	1	TRO	NA	0	0	1	0	0	0	0	3	1	0	0	0	0		0				0			0
mackde01	1871	1	RC1	NA	0	1	3	1	1	0	0	39	20	5	0	3	1		3.46				0			30
mathebo01	1871	1	FW1	NA	6	11	19	19	19	1	0	507	261	97	5	21	17		5.17				2			243
mcbridi01	1871	1	PH1	NA	18	5	25	25	25	0	0	666	285	113	3	40	15		4.58				0			223
mcmuljo01	1871	1	TRO	NA	12	15	29	29	28	0	0	747	430	153	4	75	12		5.53				0			362
meyerle01	1871	1	PH1	NA	0	0	1	0	0	0	0	3	1	1	0	2	0		9				0			1
paborch01	1871	1	CL1	NA	0	2	7	1	1	0	0	88	50	22	4	6	0		6.75				0			53
pinkhed01	1871	1	CH1	NA	1	0	3	0	0	0	1	31	10	4	0	3	0		3.48				0			8
prattal01	1871	1	CL1	NA	10	17	28	28	22	0	0	674	296	94	9	47	34		3.77				0			288
spaldal01	1871	1	BS1	NA	19	10	31	31	22	1	0	772	333	96	2	38	23		3.36				0			272
stearbi01	1871	1	WS3	NA	2	0	2	2	2	0	0	54	10	5	0	8	0		2.5				0			11
woltery01	1871	1	NY2	NA	16	16	32	32	31	1	0	849	345	108	7	39	22		3.43				0			283
wrighha01	1871	1	BS1	NA	1	0	9	0	0	0	3	56	34	13	0	4	0		6.27				0			31
zettlge01	1871	1	CH1	NA	18	9	28	28	25	0	0	722	298	73	6	25	22		2.73				0			233
bentlcy01	1872	1	MID	NA	2	15	18	17	16	0	0	462	273	105	4	12	5		6.14				0			252
brainas01	1872	1	WS3	NA	2	7	9	9	9	0	0	237	147	56	0	5	1		6.38				0			140
brainas01	1872	2	MID	NA	0	2	2	2	1	0	0	24	14	7	1	0	0		7.88				0			17
brittji01	1872	1	BR2	NA	9	28	37	37	37	0	0	1008	561	189	6	19	13		5.06				1			473
buttefr01	1872	1	MID	NA	3	2	6	5	5	0	0	147	81	28	0	1	0		5.14				0			78
cummica01	1872	1	NY2	NA	33	20	55	55	53	3	0	1491	600	139	2	30	43		2.52				0			347
fishech01	1872	1	BL1	NA	10	1	19	11	9	1	1	331	89	31	0	11	20		2.53				0			78
malonma01	1872	1	BR1	NA	0	3	3	3	3	0	0	81	98	34	1	0	0		11.33				0			86
martiph01	1872	1	TRO	NA	1	2	8	3	0	0	0	112	73	24	0	2	1		5.79				0			59
martiph01	1872	2	BR1	NA	2	7	10	9	9	0	0	255	142	42	1	4	2		4.45				0			106
mathebo01	1872	1	BL1	NA	25	18	49	47	39	0	0	1216	477	142	3	52	55		3.15				0			356
mcbridi01	1872	1	PH1	NA	30	14	47	47	47	1	0	1257	513	140	3	26	44		3.01				0			349
mcderjo01	1872	1	BR1	NA	0	7	7	7	7	0	0	189	142	58	3	12	1		8.29				0			144
mcmuljo01	1872	1	NY2	NA	1	0	3	1	1	0	0	45	18	6	0	2	1		3.6				0			15
orour01	1872	1	BR1	NA	0	1	1	1	1	0	0	27	16	6	0	2	0		6				0			15
paborch01	1872	1	CL1	NA	1	1	2	2	2	0	0	54	20	6	0	3	0		3				0			15
prattal01	1872	1	CL1	NA	2	9	15	12	8	0	0	314	150	51	3	14	7		4.39				0			133
spaldal01	1872	1	BS1	NA	38	8	48	48	41	3	0	1214	412	89	0	27	27		1.98				1			224
stearbi01	1872	1	WS4	NA	0	11	11	11	11	0	0	297	194	76	2	3	2		6.91				0			190
woltery01	1872	1	CL1	NA	3	6	12	8	5	0	0	229	119	44	3	7	4		5.19				0			106
wrighha01	1872	1	BS1	NA	1	0	7	0	0	0	1	77	26	6	0	0	1		2.1				0			12
zettlge01	1872	1	TRO	NA	14	8	25	22	17	2	0	563	209	53	2	8	17		2.54				0			132
zettlge01	1872	2	BR1	NA	1	8	9	9	8	0	0	226	105	25	1	6	8		2.99				0			62
bechtge01	1873	1	PH2	NA	0	2	3	2	1	0	0	48	27	8	0	2	0		4.5				0			24
brainas01	1873	1	BL1	NA	5	7	14	14	12	0	0	326	182	50	0	9	3		4.14				0			139
brittji01	1873	1	BR2	NA	17	36	54	54	51	1	0	1442	696	208	6	40	15		3.89				0			519
campbhu01	1873	1	ELI	NA	2	16	19	18	18	0	0	495	250	52	7	7	5		2.84				0			213
cummica01	1873	1	BL1	NA	28	14	42	42	42	1	0	1146	475	113	4	33	31		2.66				0			292
fergubo01	1873	1	BR2	NA	0	1	4	1	1	0	0	58	41	13	2	2	0		6.05				0			30
fishech01	1873	1	PH1	NA	3	4	13	5	5	0	1	253	90	17	1	10	14		1.81				0			73
fleetfr01	1873	1	ELI	NA	0	3	3	3	2	0	0	72	57	15	0	0	1		5.63				0			47
forceda01	1873	1	BL1	NA	1	1	3	1	1	0	0	54	23	7	0	0	0		3.5				0			20
frencbi01	1873	1	BL4	NA	0	1	1	1	1	0	0	27	30	12	1	0	0		12				0			27
fulmech01	1873	1	PH2	NA	0	0	2	0	0	0	0	15	7	2	0	1	0		3.6				0			4
greasjo01	1873	1	WS5	NA	1	6	7	7	7	0	0	189	112	38	3	7	3		5.43				0			90
lovetle01	1873	1	ELI	NA	0	1	1	1	1	0	0	27	22	7	0	1	1		7				0			16
martiph01	1873	1	NY2	NA	0	1	6	1	1	0	0	102	50	13	0	7	1		3.44				0			37
mathebo01	1873	1	NY2	NA	29	23	52	52	47	2	0	1329	489	126	5	62	75		2.56				0			348
mcbridi01	1873	1	PH1	NA	24	19	46	46	38	3	0	1148	453	141	3	47	25		3.32				0			325
mcdoo01	1873	1	BL4	NA	0	1	1	1	1	0	0	27	18	3	0	0	0		3				0			24
mcmuljo01	1873	1	PH1	NA	1	0	1	1	1	0	0	24	10	2	0	1	2		2.25				0			5
selmafr01	1873	1	BL4	NA	0	1	1	1	1	0	0	27	21	8	0	0	0		8				0			26
spaldal01	1873	1	BS1	NA	41	14	60	55	48	1	2	1493	643	136	5	28	31		2.46				0			414
stearbi01	1873	1	WS5	NA	7	25	32	32	32	0	0	849	481	143	8	15	4		4.55				0			395
strated01	1873	1	BL4	NA	0	3	3	3	3	0	0	81	75	25	3	0	0		8.33				0			75
woltery01	1873	1	ELI	NA	0	1	1	1	1	0	0	27	13	0	0	1	1		0				0			23
wrighha01	1873	1	BS1	NA	2	2	12	5	0	0	1	115	65	18	0	7	0		4.23				1			46
zettlge01	1873	1	PH2	NA	36	15	51	51	49	0	0	1380	593	138	3	41	28		2.7				0			368
bechtge01	1874	1	PH2	NA	1	3	6	4	4	0	0	126	64	18	0	0	13		3.86				0			42
bondto01	1874	1	BR2	NA	22	32	55	55	55	1	0	1491	609	176	16	10	11		3.19				0			440
brainas01	1874	1	BL1	NA	5	22	29	27	25	0	0	717	403	131	1	27	16		4.93				0			329
collida01	1874	1	CH2	NA	1	1	2	2	1	0	0	33	21	7	0	2	18		5.73				0			17
cummica01	1874	1	PH2	NA	28	26	54	54	52	3	0	1446	602	154	4	21	11		2.88				0			386
fergubo01	1874	1	BR2	NA	0	1	1	1	1	0	0	27	12	4	0	3	15		4				0			10
fishech01	1874	1	HR1	NA	14	23	39	35	31	0	0	951	405	107	1	10	11		3.04				0			277
forceda01	1874	1	CH2	NA	0	0	1	0	0	0	0	21	22	19	4	0	0		24.43				0			24
hatfijo01	1874	1	NY2	NA	0	1	3	0	0	0	0	24	11	2	0	1	13		2.25				0			6
mannija01	1874	1	BL1	NA	4	16	22	20	18	0	0	539	231	68	3	10	12		3.41				0			168
mathebo01	1874	1	NY2	NA	42	22	65	65	62	4	0	1734	647	148	3	39	10		2.3				0			371
mcbridi01	1874	1	PH1	NA	33	22	55	55	55	0	0	1461	514	138	5	29	10		2.55				0			344
ryanjo01	1874	1	BL1	NA	0	0	1	0	0	0	0	10	13	3	0	0	0		8.1				0			8
spaldal01	1874	1	BS1	NA	52	16	71	69	65	4	0	1849	753	161	1	23	11		2.35				0			402
stearbi01	1874	1	HR1	NA	2	14	22	18	14	0	1	492	255	82	1	13	14		4.5				0			194
wrighha01	1874	1	BS1	NA	0	2	6	2	0	0	3	50	24	5	0	4	15		2.7				0			13
zettlge01	1874	1	CH2	NA	27	30	57	57	57	3	0	1547	653	176	3	46	12		3.07				0			439
arundha01	1875	1	BR2	NA	0	1	1	1	0	0	0	7	6	3	0	0	0		11.57				0			6
bechtge01	1875	1	PH3	NA	2	12	14	14	14	0	0	378	170	55	0	3	12		3.93				0			138
bechtge01	1875	2	PH1	NA	3	1	4	4	4	0	0	108	45	9	0	3	12		2.25				0			19
blongjo01	1875	1	SL1	NA	3	12	15	15	12	1	0	387	169	48	0	2	11		3.35				1			121
bondto01	1875	1	HR1	NA	19	16	40	39	37	6	0	1056	301	61	3	10	8		1.56				0			152
bordejo01	1875	1	PH2	NA	2	4	7	7	7	2	0	198	47	12	0	7	7		1.64				0			30
boydbi01	1875	1	BR2	NA	0	0	1	0	0	0	0	5	4	0	0	0	0		0				0			3
bradlge01	1875	1	SL2	NA	33	26	60	60	57	4	0	1607	538	122	3	16	9		2.05				0			304
cassijo01	1875	1	BR2	NA	1	20	30	22	18	0	0	644	278	95	6	12	12		3.98				0			242
clintji01	1875	1	BR2	NA	1	14	17	14	9	0	0	369	146	44	0	8	11		3.22				0			104
cummica01	1875	1	HR1	NA	35	12	48	47	46	7	0	1251	396	74	0	6	8		1.6				0			184
devliji01	1875	1	CH2	NA	7	16	28	24	24	0	0	672	254	72	0	11	10		2.89				0			179
edwar01	1875	1	BR2	NA	0	1	1	1	0	0	0	6	4	2	0	0	0		9				0			6
fergubo01	1875	1	HR1	NA	0	0	1	0	0	0	0	6	9	4	1	0	0		18				0			7
fishech01	1875	1	PH2	NA	22	19	41	41	36	2	0	1070	345	76	6	9	8		1.92				0			189
fleetfr01	1875	1	SL2	NA	2	1	3	3	3	0	0	81	33	7	0	3	12		2.33				0			17
fleetfr01	1875	2	BR2	NA	0	1	2	1	1	0	0	46	24	8	1	0	14		4.7				0			20
galvipu01	1875	1	SL2	NA	4	2	8	7	7	1	1	186	53	15	0	1	7		2.18				0			37
gedneco01	1875	1	NY2	NA	1	0	2	1	1	0	0	33	7	2	0	1	6		1.64				0			4
goldemi01	1875	1	KEO	NA	1	12	13	13	13	0	0	336	110	35	0	14	10		2.81				0			88
goldemi01	1875	2	CH2	NA	6	7	14	14	12	1	0	357	129	38	0	11	10		2.87				0			95
heifefr01	1875	1	BS1	NA	0	0	2	0	0	0	1	7	6	2	0	0	0		7.71				0			4
knighge01	1875	1	NH1	NA	1	0	1	1	1	0	0	27	12	2	0	0	12		2				0			6
knighlo01	1875	1	PH1	NA	6	5	13	13	12	0	0	321	114	29	0	12	10		2.44				0			73
luffhe01	1875	1	NH1	NA	1	6	10	7	5	0	0	209	100	37	2	3	13		4.78				2			91
mannija01	1875	1	BS1	NA	15	2	27	17	8	1	7	419	153	34	1	14	10		2.19				0			86
masonch01	1875	2	WS6	NA	0	0	1	0	0	0	0	6	3	1	0	1	0		4.5				0			2
mathebo01	1875	1	NY2	NA	29	38	70	70	69	2	0	1880	709	168	3	23	10		2.41				0			421
mcbridi01	1875	1	PH1	NA	44	14	60	60	59	6	0	1614	602	118	4	25	10		1.97				0			297
mcmuljo01	1875	1	PH2	NA	0	0	4	0	0	0	0	38	31	9	0	1	22		6.39				0			23
mcveyca01	1875	1	BS1	NA	1	0	3	2	0	0	1	33	15	4	0	1	13		3.27				0			9
morgapi01	1875	1	SL1	NA	1	3	7	4	4	1	0	126	38	16	0	1	8		3.43				0			40
nichotr01	1875	1	NH1	NA	4	29	34	33	30	0	0	864	319	97	2	10	10		3.03				1			245
oneilj01	1875	1	BR2	NA	0	4	5	4	3	0	0	102	56	18	2	0	14		4.76				0			45
paborch01	1875	1	BR2	NA	0	1	1	1	0	0	0	12	11	4	0	1	0		9				0			12
parksbi01	1875	1	WS6	NA	4	8	14	11	9	0	0	320	146	48	5	6	12		4.05				0			120
parksbi01	1875	2	PH2	NA	0	0	2	0	0	0	0	16	13	4	0	1	0		6.75				0			11
pearcdi01	1875	1	SL2	NA	0	0	2	0	0	0	0	16	10	2	0	0	0		3.38				0			11
ryanjo01	1875	1	NH1	NA	1	5	10	6	4	0	0	178	69	22	1	9	11		3.34				0			55
spaldal01	1875	1	BS1	NA	55	5	72	63	52	7	8	1725	571	97	1	14	9		1.52				1			241
stearbi01	1875	1	WS6	NA	1	14	17	16	14	0	0	423	243	84	1	4	15		5.36				0			211
suttoez01	1875	1	PH1	NA	0	0	2	0	0	0	0	18	14	5	0	0	0		7.5				0			13
weavesa01	1875	1	PH2	NA	1	0	1	1	1	0	0	18	6	1	0	2	12		1.5				0			2
withech01	1875	1	WS6	NA	0	1	1	1	0	0	0	3	4	2	0	0	0		18				0			5
wrighge01	1875	1	BS1	NA	0	1	2	0	0	0	0	12	5	1	0	0	11		2.25				0			3
zettlge01	1875	1	CH2	NA	17	14	31	31	29	6	0	846	269	57	0	6	8		1.82				0			142
zettlge01	1875	2	PH2	NA	12	8	21	21	20	1	0	541	208	48	0	10	10		2.4				0			121
barnero01	1876	1	CHN	NL	0	0	1	0	0	0	0	4	7	3	0	0	0	0.53	20.25		0		0	13	0	8
blongjo01	1876	1	SL3	NL	0	0	1	0	0	0	0	12	2	0	0	1	0	0.15	0		0		0	14	1	0
bondto01	1876	1	HAR	NL	31	13	45	45	45	6	0	1224	355	76	2	13	88	0.22	1.68		8		0	1623	0	164
bootham01	1876	1	CN1	NL	0	1	3	1	0	0	0	29	22	10	0	0	0	0.43	9.31		0		0	51	1	18
boothed01	1876	1	NY3	NL	0	0	1	0	0	0	0	15	16	6	0	0	0	0.47	10.8		0		0	34	1	10
bordejo01	1876	1	BSN	NL	11	12	29	24	16	2	1	655	257	70	4	51	34	0.27	2.89		21		0	983	6	155
bradlfo01	1876	1	BSN	NL	9	10	22	21	16	1	1	520	201	48	1	16	16	0.26	2.49		7		0	779	1	116
bradlge01	1876	1	SL3	NL	45	19	64	64	63	16	0	1719	470	78	3	38	103	0.21	1.23		34		0	2269	0	229
clackbo01	1876	1	CN1	NL	0	0	1	0	0	0	0	6	2	1	0	0	0	0.25	4.5		0		0	8	1	1
clintji01	1876	1	LS1	NL	0	1	1	1	1	0	0	27	12	6	0	0	1	0.27	6		2		0	43	0	11
coonwi01	1876	1	PHN	NL	0	0	2	0	0	0	0	21	9	4	0	0	0	0.25	5.14		0		0	35	2	8
cummica01	1876	1	HAR	NL	16	8	24	24	24	5	0	648	215	40	0	14	26	0.23	1.67		7		0	913	0	97
deando01	1876	1	CN1	NL	4	26	30	30	26	0	0	788	397	109	1	24	22	0.32	3.73		17		0	1257	1	268
devliji01	1876	1	LS1	NL	30	35	68	68	66	5	0	1866	566	108	3	37	122	0.22	1.56		14		0	2568	0	309
fishech01	1876	1	CN1	NL	4	20	28	24	22	0	0	688	294	77	6	6	29	0.28	3.02		6		0	1039	4	202
gouldch01	1876	1	CN1	NL	0	0	2	0	0	0	0	13	10	0	0	0	0	0.4	0		0		0	25	1	9
knighlo01	1876	1	PHN	NL	10	22	34	32	27	0	0	846	383	82	0	34	12	0.29	2.62		23		0	1324	1	288
laffefl01	1876	1	PHN	NL	0	1	1	1	1	0	0	27	5	0	0	0	0	0.15	0		0		0	33	0	3
larkite01	1876	1	NY3	NL	0	1	1	1	1	0	0	27	9	3	0	0	0	0.23	3		0		0	39	0	7
mannija01	1876	1	BSN	NL	18	5	34	20	13	0	5	592	213	47	1	32	24	0.25	2.14		16		0	878	13	139
mathebo01	1876	1	NY3	NL	21	34	56	56	55	2	0	1548	693	164	8	24	37	0.3	2.86		3		0	2327	0	395
mcbridi01	1876	1	BSN	NL	0	4	4	4	3	0	0	99	53	10	1	5	2	0.35	2.73		1		0	155	0	35
mcveyca01	1876	1	CHN	NL	5	2	11	6	5	0	2	178	57	10	0	2	9	0.23	1.52		2		0	245	5	22
meyerle01	1876	1	PHN	NL	0	2	2	2	2	0	0	54	28	10	0	1	0	0.33	5		6		0	84	0	23
nichotr01	1876	1	BSN	NL	1	0	1	1	1	0	0	27	7	1	0	0	0	0.2	1		0		0	35	0	5
pearcfr01	1876	1	LS1	NL	0	0	1	0	0	0	0	12	5	2	0	1	1	0.26	4.5		2		0	20	1	4
peterjo01	1876	1	CHN	NL	0	0	1	0	0	0	1	3	1	0	0	1	0	0.25	0		0		0	5	1	1
piersda01	1876	1	CN1	NL	0	1	1	1	0	0	0	0	2	2	1	0	0	1			0		0	2	0	2
ryanjo01	1876	1	LS1	NL	0	0	1	0	0	0	0	24	22	5	0	0	1	0.44	5.63		7		0	49	1	20
spaldal01	1876	1	CHN	NL	47	12	61	60	53	8	0	1586	542	103	6	26	39	0.24	1.75		1		0	2219	1	226
whitede01	1876	1	CHN	NL	0	0	1	0	0	0	1	6	1	0	0	0	3	0.14	0		0		0	7	1	0
willida01	1876	1	CN1	NL	1	8	9	9	9	0	0	249	123	39	1	4	9	0.33	4.23		5		0	367	0	75
wrighge01	1876	1	BSN	NL	0	0	1	0	0	0	0	3	1	0	0	0	1	0.25	0		1		0	4	1	0
zettlge01	1876	1	PHN	NL	4	20	28	25	23	1	2	702	358	101	2	6	10	0.33	3.88		4		0	1089	4	212
battijo01	1877	1	SL3	NL	0	0	1	0	0	0	0	11	3	2	0	1	1	0.2	4.91		1		0	16	1	2
blongjo01	1877	1	SL3	NL	10	9	25	21	17	0	0	562	203	57	0	38	51	0.26	2.74		29		0	813	4	121
bondto01	1877	1	BSN	NL	40	17	58	58	58	6	0	1563	530	122	5	36	170	0.24	2.11		18		0	2165	0	248
bootham01	1877	1	CN1	NL	1	7	12	8	6	0	0	258	114	34	1	13	18	0.29	3.56		7		0	398	4	75
bradlge01	1877	1	CHN	NL	18	23	50	44	35	2	0	1182	452	145	4	39	59	0.26	3.31		39		0	1719	7	266
cassijo01	1877	1	HAR	NL	1	1	2	2	2	0	0	54	24	10	0	1	2	0.32	5		0		0	76	0	11
cummica01	1877	1	CN1	NL	5	14	19	19	16	0	0	467	219	75	2	13	11	0.31	4.34		15		0	709	0	144
devliji01	1877	1	LS1	NL	35	25	61	61	61	4	0	1677	617	140	4	41	141	0.27	2.25		20		0	2328	0	288
fergubo01	1877	1	HAR	NL	1	1	3	2	2	0	0	75	38	11	0	2	1	0.35	3.96		0		0	110	1	15
larkite01	1877	1	HAR	NL	29	25	56	56	55	4	0	1503	510	119	2	53	96	0.24	2.14		18		0	2132	0	285
mannija01	1877	1	CN1	NL	0	4	10	4	2	0	1	132	83	34	1	7	6	0.37	6.95		11		0	226	6	65
mathebo01	1877	1	CN1	NL	3	12	15	15	13	0	0	388	208	58	0	17	9	0.33	4.04		10		0	631	0	132
mcveyca01	1877	1	CHN	NL	4	8	17	10	6	0	2	276	129	46	2	11	20	0.3	4.5		3		0	439	6	87
mitchbo01	1877	1	CN1	NL	6	5	12	12	11	1	0	300	123	39	0	11	41	0.28	3.51		4		0	448	0	69
nichotr01	1877	1	SL3	NL	18	23	42	39	35	1	0	1050	376	101	2	53	80	0.26	2.6		22		0	1484	3	195
reisla01	1877	1	CHN	NL	3	1	4	4	4	1	0	108	29	3	1	6	11	0.21	0.75		3		0	142	0	8
roweda01	1877	1	CHN	NL	0	1	1	1	0	0	0	3	3	2	0	2	0	0.6	18		0		0	7	0	2
spaldal01	1877	1	CHN	NL	1	0	4	1	0	0	1	33	17	4	0	0	2	0.32	3.27		0		0	53	2	12
whitewi01	1877	1	BSN	NL	2	1	3	3	3	1	0	81	27	9	0	2	7	0.24	3		2		0	113	0	15
allisdo01	1878	1	PRO	NL	0	0	1	0	0	0	0	15	11	1	0	1	0	0.44	1.8		0		0	26	1	5
bondto01	1878	1	BSN	NL	40	19	59	59	57	9	0	1598	571	122	5	33	182	0.26	2.06		13		0	2159	1	222
brownle01	1878	1	PRO	NL	0	0	1	0	0	0	0	3	0	2	0	4	0	0	18		2		0	8	0	4
coreyfr01	1878	1	PRO	NL	1	2	5	5	2	0	0	69	22	6	0	7	7	0.25	2.35		1		0	95	0	10
ellicjo01	1878	1	ML2	NL	0	1	1	0	0	0	0	9	1	1	0	1	0	0.1	3		1		0	11	1	1
fishech01	1878	1	PRO	NL	0	1	1	1	1	0	0	27	14	4	0	0	2	0.3	4		1		0	46	0	12
goldemi01	1878	1	ML2	NL	3	13	22	18	15	0	0	483	217	74	1	33	52	0.29	4.14		24		0	769	4	171
hankifr01	1878	1	CHN	NL	0	1	1	1	1	0	0	27	11	6	0	0	4	0.28	6		1		0	39	0	9
healeto01	1878	1	PRO	NL	0	3	3	3	3	0	0	72	27	8	1	7	2	0.27	3		6		0	104	0	17
healeto01	1878	2	IN1	NL	6	4	11	10	9	0	1	267	98	22	1	13	18	0.27	2.22		2		0	376	1	50
larkite01	1878	1	CHN	NL	29	26	56	56	56	1	0	1518	511	126	4	31	163	0.24	2.24		37		0	2105	0	288
mannija01	1878	1	BSN	NL	1	0	3	1	1	0	0	34	24	18	1	5	2	0.39	14.29		4		0	66	1	19
mccorji01	1878	1	IN1	NL	5	8	14	14	12	1	0	351	128	22	0	15	36	0.26	1.69		4		0	490	0	47
mckelru01	1878	1	IN1	NL	0	2	4	1	1	0	0	75	38	6	1	3	3	0.32	2.16		3		0	121	3	23
mitchbo01	1878	1	CN1	NL	7	2	9	9	9	1	0	240	69	19	1	18	51	0.22	2.14		3		0	328	0	32
nichotr01	1878	1	PRO	NL	4	7	11	10	10	0	0	294	157	46	0	8	21	0.34	4.22		9		0	464	1	98
nolanth01	1878	1	IN1	NL	13	22	38	38	37	1	0	1041	357	99	1	56	125	0.25	2.57		21		0	1469	0	208
reisla01	1878	1	CHN	NL	1	3	4	4	4	0	0	108	55	13	0	4	8	0.33	3.25		0		0	168	0	34
wardjo01	1878	1	PRO	NL	22	13	37	37	37	6	0	1002	308	56	3	34	116	0.23	1.51		26		0	1365	0	151
weavesa01	1878	1	ML2	NL	12	31	45	43	39	1	0	1149	371	83	2	21	95	0.23	1.95		25		0	1589	2	214
wheelha01	1878	1	PRO	NL	6	1	7	6	6	0	0	186	70	24	1	25	25	0.27	3.48		13		0	280	1	40
whitewi01	1878	1	CN1	NL	30	21	52	52	52	5	0	1404	477	93	1	45	169	0.25	1.79		40		0	1939	0	249
bondto01	1879	1	BSN	NL	43	19	64	64	59	11	0	1666	543	121	8	24	155	0.25	1.96		13		0	2189	1	206
bradlge01	1879	1	TRN	NL	13	40	54	54	53	3	0	1461	590	154	12	26	133	0.27	2.85		43		0	2170	0	361
broutda01	1879	1	TRN	NL	0	2	3	2	2	0	0	63	35	13	0	8	6	0.34	5.57		4		0	110	1	30
dorgami01	1879	1	SR1	NL	0	0	2	0	0	0	0	36	13	3	0	2	8	0.26	2.25		2		0	52	0	6
foleycu01	1879	1	BSN	NL	9	9	21	16	16	1	0	485	175	45	1	15	57	0.25	2.51		9		0	709	4	111
galvipu01	1879	1	BFN	NL	37	27	66	66	65	6	0	1779	585	150	3	31	136	0.24	2.28		23		0	2436	0	299
gardngi01	1879	1	TRN	NL	0	2	2	2	2	0	0	42	27	9	0	0	3	0.36	5.79		7		0	74	0	21
goldsfr01	1879	1	TRN	NL	2	4	8	7	7	0	0	189	61	11	0	1	31	0.23	1.57		3		0	258	1	38
hankifr01	1879	1	CHN	NL	15	10	26	25	25	2	0	692	248	64	0	27	69	0.25	2.5		4		0	1000	1	134
larkite01	1879	1	CHN	NL	31	23	58	58	57	4	0	1540	514	139	5	30	142	0.24	2.44		20		0	2176	0	277
mathebo01	1879	1	PRO	NL	12	6	27	25	15	1	1	567	194	48	4	26	90	0.25	2.29		17		0	779	2	85
mccorha01	1879	1	SR1	NL	18	33	54	54	49	5	0	1372	517	152	3	31	96	0.26	2.99		31		0	1975	4	291
mccorji01	1879	1	CL2	NL	20	40	62	60	59	3	0	1639	582	147	3	74	197	0.25	2.42		30		0	2325	1	308
mcgunbi01	1879	1	BFN	NL	9	5	14	13	13	2	0	360	113	35	0	16	62	0.23	2.63		2		0	496	1	66
mcmanpa01	1879	1	TRN	NL	0	2	2	2	2	0	0	63	24	7	1	1	6	0.25	3		2		0	94	0	21
mcveyca01	1879	1	CN1	NL	0	2	3	1	1	0	0	42	34	13	1	2	7	0.45	8.36		3		0	77	1	23
mitchbo01	1879	1	CL2	NL	7	15	23	22	20	0	0	584	236	71	1	42	90	0.28	3.28		26		0	876	2	153
neaglja01	1879	1	CN1	NL	0	1	2	2	1	0	0	39	13	5	0	5	4	0.24	3.46		1		0	59	0	12
purcebl01	1879	1	SR1	NL	4	15	22	17	15	0	0	539	245	75	1	19	28	0.3	3.76		31		0	827	3	165
purcebl01	1879	2	CN1	NL	0	2	2	2	2	0	0	54	27	8	0	2	3	0.35	4		3		0	78	0	15
richmle01	1879	1	BSN	NL	1	0	1	1	1	0	0	27	4	2	0	1	11	0.11	2		1		0	36	0	6
salisha01	1879	1	TRN	NL	4	6	10	10	9	0	0	267	103	22	0	11	31	0.26	2.22		8		0	400	0	72
tyngji01	1879	1	BSN	NL	1	2	3	3	3	0	0	81	35	15	0	6	7	0.29	5		1		0	126	0	25
wardjo01	1879	1	PRO	NL	47	19	70	60	58	2	1	1761	571	140	5	36	239	0.23	2.15		29		0	2425	10	270
wheelha01	1879	1	CN1	NL	0	1	1	1	0	0	0	3	6	9	0	4	0	0.66	81		1		0	13	0	10
whitewi01	1879	1	CN1	NL	43	31	76	75	75	4	0	2040	676	150	10	68	232	0.23	1.99		49		0	2906	1	404
bondto01	1880	1	BSN	NL	26	29	63	57	49	3	0	1479	559	146	1	45	118	0.27	2.67		24		0	2082	6	298
bradlge01	1880	1	PRO	NL	13	8	28	20	16	4	1	588	158	30	2	6	54	0.21	1.38		7		0	757	7	66
burnsto01	1880	1	CHN	NL	0	0	1	0	0	0	0	4	2	0	0	2	1	0.25	0		0		0	10	0	4
corcola01	1880	1	CHN	NL	43	14	63	60	57	4	2	1609	404	116	6	99	268	0.19	1.95		19		0	2133	3	218
coreyfr01	1880	1	WOR	NL	8	9	25	17	9	2	2	445	131	40	6	16	47	0.21	2.43		3		0	614	6	72
dorgami01	1880	1	PRO	NL	0	0	1	0	0	0	0	24	4	1	0	0	2	0.13	1.13		0		0	29	1	3
driscde01	1880	1	BFN	NL	1	3	6	4	4	0	0	125	48	18	1	9	17	0.27	3.89		8		0	187	2	33
evansja01	1880	1	TRN	NL	0	0	1	0	0	0	0	12	11	6	0	0	0	0.52	13.5		0		0	21	1	8
foleycu01	1880	1	BSN	NL	14	14	36	28	21	1	0	714	264	103	1	40	68	0.27	3.89		15		0	1004	8	150
galvipu01	1880	1	BFN	NL	20	35	58	54	46	5	0	1376	528	138	5	32	128	0.27	2.71		24		0	1969	4	281
gardngi01	1880	1	CL2	NL	1	8	9	9	9	0	0	231	80	22	2	20	21	0.25	2.57		10		0	335	0	53
goldsfr01	1880	1	CHN	NL	21	3	26	24	22	4	1	631	189	41	2	18	90	0.23	1.75		10		0	837	1	80
guthch01	1880	1	CHN	NL	1	0	1	1	1	0	0	27	12	5	0	1	7	0.29	5		4		0	42	0	8
hankifr01	1880	1	CL2	NL	1	1	4	2	2	0	1	75	20	3	0	3	8	0.21	1.08		0		0	96	2	10
hornujo01	1880	1	BFN	NL	0	0	1	0	0	0	0	9	2	2	0	1	0	0.16	6		1		0	13	1	2
keefeti01	1880	1	TRN	NL	6	6	12	12	12	0	0	315	71	10	0	17	43	0.18	0.86		1		0	397	0	27
kellyki01	1880	1	CHN	NL	0	0	1	0	0	0	0	9	3	0	0	1	1	0.25	0		0		0	13	1	2
larkite01	1880	1	TRN	NL	0	5	5	5	3	0	0	114	83	37	1	10	5	0.42	8.76		9		0	207	0	65
learyja01	1880	1	BSN	NL	0	1	1	1	0	0	0	9	8	5	0	0	1	0.72	15		0		0	11	0	5
mccorji01	1880	1	CL2	NL	45	28	74	74	72	7	0	1973	585	135	2	75	260	0.22	1.85		21		0	2669	0	274
mcgunbi01	1880	1	BFN	NL	2	3	5	5	4	1	0	111	43	14	0	8	3	0.27	3.41		1		0	162	0	19
morrijo01	1880	1	BSN	NL	0	0	3	0	0	0	0	32	9	1	0	1	0	0.27	0.84		0		0	34	2	3
mountfr01	1880	1	TRN	NL	1	1	2	2	2	0	0	51	23	10	0	6	2	0.3	5.29		1		0	81	0	17
nichotr01	1880	1	WOR	NL	0	2	2	2	2	0	0	53	29	8	0	4	4	0.35	4.08		1		0	85	0	16
poormto01	1880	1	BFN	NL	1	8	11	9	9	0	1	255	117	39	3	19	13	0.3	4.13		7		0	400	2	90
poormto01	1880	2	CHN	NL	2	0	2	1	0	0	0	45	12	4	0	8	0	0.2	2.4		0		0	67	1	5
purcebl01	1880	1	CN1	NL	3	17	25	21	21	0	0	588	235	70	1	32	47	0.27	3.21		10		0	899	4	149
richmle01	1880	1	WOR	NL	32	32	74	66	57	5	3	1772	541	141	7	74	243	0.23	2.15		29		0	2410	9	278
stoveha01	1880	1	WOR	NL	0	0	2	0	0	0	0	18	8	3	0	3	3	0.3	4.5		0		0	32	2	4
wardjo01	1880	1	PRO	NL	39	24	70	67	59	8	1	1785	501	115	5	45	230	0.21	1.74		19		0	2351	4	230
welchmi01	1880	1	TRN	NL	34	30	65	64	64	4	0	1722	575	162	7	80	123	0.24	2.54		26		0	2387	1	321
whitewi01	1880	1	CN1	NL	18	42	62	62	58	3	0	1552	550	123	9	56	161	0.25	2.14		35		0	2217	0	323
wiedmst01	1880	1	BFN	NL	0	9	17	13	9	0	0	341	141	43	1	9	25	0.29	3.4		9		0	493	4	77
bondto01	1881	1	BSN	NL	0	3	3	3	2	0	0	76	40	12	3	2	2	0.36	4.26		3		0	113	0	17
bradlge01	1881	2	CL2	NL	2	4	6	6	5	0	0	153	70	22	2	3	6	0.32	3.88		2		0	222	0	36
corcola01	1881	1	CHN	NL	31	14	45	44	43	4	0	1190	380	102	10	78	150	0.24	2.31		27		0	1650	1	204
coreyfr01	1881	1	WOR	NL	6	15	23	21	20	1	0	566	231	78	3	31	33	0.29	3.72		8		0	803	2	127
derbyge01	1881	1	DTN	NL	29	26	56	55	55	9	0	1484	505	121	3	86	212	0.25	2.2		14		0	2101	1	252
foleycu01	1881	1	BFN	NL	3	4	10	6	2	0	0	123	70	24	1	5	2	0.33	5.27		1		0	213	3	48
foxjo01	1881	1	BSN	NL	6	8	17	16	12	0	0	373	144	46	0	39	30	0.27	3.33		21		0	556	1	90
galvipu01	1881	1	BFN	NL	28	24	56	53	48	5	0	1422	546	125	4	46	136	0.27	2.37		31		0	2037	3	250
goldsfr01	1881	1	CHN	NL	24	13	39	39	37	5	0	990	328	95	4	44	76	0.24	2.59		10		1	1373	0	166
keefeti01	1881	1	TRN	NL	18	27	45	45	45	4	0	1206	442	145	4	81	103	0.27	3.25		13		0	1693	0	243
learyja01	1881	1	DTN	NL	0	2	2	2	1	0	0	39	13	6	0	2	2	0.25	4.15		0		0	53	0	6
lynchja01	1881	1	BFN	NL	10	9	20	19	17	0	0	497	203	66	2	29	32	0.29	3.59		10		1	713	1	112
mathebo01	1881	1	PRO	NL	4	8	14	14	10	1	0	307	121	36	2	21	28	0.26	3.17		9		0	473	0	81
mathebo01	1881	2	BSN	NL	1	0	5	1	1	0	2	69	22	6	0	11	5	0.23	2.35		2		0	103	4	11
mccorha01	1881	1	WOR	NL	1	8	9	9	9	1	0	235	89	31	1	15	7	0.27	3.56		3		0	339	0	50
mccorji01	1881	1	CL2	NL	26	30	59	58	57	2	0	1578	484	143	4	84	178	0.23	2.45		24		0	2145	1	267
morrijo01	1881	1	BSN	NL	0	1	3	0	0	0	1	17	9	4	0	1	0	0.33	6.35		0		0	28	3	8
mountfr01	1881	1	DTN	NL	3	4	7	7	7	0	0	180	80	35	2	18	13	0.29	5.25		10		0	292	0	63
mullato01	1881	1	DTN	NL	1	4	5	5	5	0	0	132	55	24	2	17	7	0.3	4.91		6		0	199	0	42
nolanth01	1881	1	CL2	NL	8	14	22	21	20	0	0	540	183	61	3	38	54	0.25	3.05		10		0	768	1	111
purcebl01	1881	2	BFN	NL	4	1	9	5	5	0	0	185	62	19	2	9	15	0.24	2.77		2		0	259	4	37
radboch01	1881	1	PRO	NL	25	11	41	36	34	3	0	976	309	88	1	64	117	0.23	2.43		17		0	1380	4	162
richmle01	1881	1	WOR	NL	25	26	53	52	50	3	0	1387	547	174	7	68	156	0.28	3.39		24		1	1992	1	302
taylobi01	1881	1	WOR	NL	0	1	1	1	1	0	0	24	15	7	0	6	0	0.36	7.88		2		0	47	0	13
taylobi01	1881	3	CL2	NL	0	0	1	0	0	0	0	9	0	0	0	1	2	0	0		0		0	10	1	0
wardjo01	1881	1	PRO	NL	18	18	39	35	32	3	0	990	326	78	2	53	119	0.24	2.13		32		0	1398	5	183
welchmi01	1881	1	TRN	NL	21	18	40	40	40	4	0	1104	371	109	7	78	104	0.25	2.67		11		0	1534	0	186
whitewi01	1881	1	DTN	NL	0	2	2	2	2	0	0	54	24	10	0	2	5	0.29	5		1		0	83	0	18
whitnji01	1881	1	BSN	NL	31	33	66	63	57	6	0	1657	548	152	6	90	162	0.24	2.48		46		1	2301	3	284
wiedmst01	1881	1	DTN	NL	8	5	13	13	13	1	0	345	108	23	1	12	26	0.23	1.8		3		0	466	0	48
willine01	1881	1	CHN	NL	1	1	3	1	1	0	0	54	14	4	0	0	2	0.2	2		1		0	67	2	9
arundha01	1882	1	PT1	AA	4	10	14	14	13	0	0	360	155	62	3	23	47		4.65		0		0	0	0	112
bohnch01	1882	1	LS2	AA	1	1	2	2	2	0	0	54	21	6	0	3	1		3		0		0	0	0	8
bondto01	1882	1	WOR	NL	0	1	2	2	0	0	0	37	12	6	0	7	2	0.21	4.38		1		0	62	0	13
bradlge01	1882	1	CL2	NL	6	9	18	16	15	0	0	441	164	61	5	22	32	0.26	3.73		14		0	643	2	102
browned01	1882	1	SL4	AA	0	0	1	0	0	0	0	6	2	0	0	0	1		0		0		0	0	1	1
brownto01	1882	1	BL2	AA	0	0	2	0	0	0	0	25	13	1	0	6	2		1.08		0		0	0	1	7
buffich01	1882	1	BSN	NL	2	3	5	5	4	1	0	126	53	19	2	14	17	0.29	4.07		2		0	193	0	34
burkeja01	1882	1	BFN	NL	0	1	1	1	0	0	0	12	10	5	0	0	0	0.43	11.25		0		0	23	0	9
clarkjo01	1882	1	WOR	NL	1	2	3	3	2	0	0	72	49	12	0	2	3	0.39	4.5		3		0	127	0	31
comisch01	1882	1	SL4	AA	0	1	2	1	1	0	0	24	12	0	0	3	2		0		0		0	0	0	8
corcola01	1882	1	CHN	NL	27	12	39	39	38	3	0	1067	281	77	5	63	170	0.2	1.95		17		0	1469	0	153
coreyfr01	1882	1	WOR	NL	1	13	21	14	12	0	0	417	180	55	5	19	36	0.28	3.56		23		0	648	7	132
critcmo01	1882	1	PT1	AA	1	0	1	1	1	1	0	27	7	0	0	1	3		0		0		0	0	0	0
critcmo01	1882	2	SL4	AA	0	4	4	4	4	0	0	102	43	16	3	7	2		4.24		0		0	0	0	31
dailyhu01	1882	1	BFN	NL	15	14	29	29	29	0	0	767	246	85	6	70	116	0.23	2.99		11		0	1120	0	165
derbyge01	1882	1	DTN	NL	17	20	40	39	38	3	0	1086	386	131	8	81	182	0.25	3.26		16		0	1590	1	267
dorrbe01	1882	1	SL4	AA	2	6	8	8	8	0	0	198	53	19	0	1	34		2.59		0		0	0	0	39
doylejo02	1882	1	SL4	AA	0	3	3	3	3	0	0	72	41	7	0	3	5		2.63		2		0	125	0	33
driscde01	1882	1	PT1	AA	13	9	23	23	23	0	0	603	162	27	0	12	59		1.21		0		0	0	0	73
eganji01	1882	1	TRN	NL	4	6	12	10	10	0	0	300	133	46	2	24	20	0.31	4.14		5		0	446	2	79
evansja01	1882	1	WOR	NL	0	1	1	1	1	0	0	24	13	5	1	0	2	0.31	5.63		1		0	41	0	10
ewingbu01	1882	1	TRN	NL	0	0	1	0	0	0	0	3	2	1	0	1	0	0.4	9		0		0	6	1	1
foleycu01	1882	1	BFN	NL	0	0	1	0	0	0	0	3	2	2	0	0	0	0.33	18		0		0	6	1	2
fusseed01	1882	1	SL4	AA	1	2	4	2	2	0	1	69	34	12	0	2	3		4.7		0		0	0	2	24
galvipu01	1882	1	BFN	NL	28	23	52	51	48	3	0	1336	476	157	8	40	162	0.25	3.17		19		1	1900	2	255
geisbi01	1882	1	BL2	AA	4	9	13	13	10	1	0	287	84	51	2	22	10		4.8		0		0	0	0	73
goldsfr01	1882	1	CHN	NL	28	17	45	45	45	4	0	1215	377	109	7	38	109	0.23	2.42		13		0	1637	0	192
halbred01	1882	1	PH4	AA	0	1	1	1	1	0	0	24	17	7	1	4	4		7.88		0		0	0	0	12
heckegu01	1882	1	LS2	AA	6	6	13	11	10	0	0	312	75	15	0	5	33		1.3		0		0	0	1	49
hoganed01	1882	1	SL4	AA	0	1	1	1	1	0	0	24	10	1	0	0	4		1.13		0		0	0	0	7
keefeti01	1882	1	TRN	NL	17	26	43	42	41	1	0	1125	368	104	4	81	116	0.24	2.5		8		0	1588	1	221
landido01	1882	1	PH4	AA	1	1	2	2	2	0	0	51	16	6	1	1	13		3.18		0		0	0	0	12
landido01	1882	2	BL2	AA	11	27	42	39	35	0	0	1023	409	126	7	46	62		3.33		0		0	0	3	252
learyja01	1882	1	PT1	AA	1	0	3	2	1	0	0	56	28	13	0	3	5		6.27		0		0	0	1	22
learyja01	1882	2	BL2	AA	2	1	3	3	3	0	0	78	29	4	1	8	2		1.38		0		0	0	0	22
mathebo01	1882	1	BSN	NL	19	15	34	32	31	0	0	855	278	91	5	22	153	0.23	2.87		13		0	1220	2	151
mccorha01	1882	1	CN2	AA	14	11	25	25	24	3	0	659	177	37	4	42	33		1.52		0		0	0	0	87
mccorji01	1882	1	CL2	NL	36	30	68	67	65	4	0	1787	550	157	14	103	200	0.23	2.37		22		0	2412	1	274
mcginju01	1882	1	SL4	AA	25	18	45	45	43	3	0	1165	391	112	2	53	134		2.6		0		0	0	0	241
mitchbo01	1882	1	SL4	AA	0	1	1	1	0	0	0	21	12	6	0	2	2		7.71		0		0	0	0	13
morrijo01	1882	1	BSN	NL	0	0	1	0	0	0	0	6	3	0	0	0	2	0.37	0		0		0	8	1	0
mountfr01	1882	1	WOR	NL	0	5	5	5	5	0	0	126	47	14	0	11	5	0	3				0		0	30
mountfr01	1882	2	PH4	AA	2	6	8	8	8	0	0	207	72	30	1	11	15		3.91		10		0	308	0	49
mountfr01	1882	3	WOR	NL	2	11	13	13	11	0	0	306	138	45	4	24	24	0.29	3.97				0		0	93
mullato01	1882	1	LS2	AA	30	24	55	55	51	5	0	1381	418	96	4	78	170		1.88		0		0	0	0	212
myershe01	1882	1	BL2	AA	0	2	6	2	1	0	0	78	30	19	2	4	7		6.58		0		0	0	3	28
nichotr01	1882	1	BL2	AA	1	12	16	13	12	0	0	355	155	66	2	17	21		5.02		0		0	0	3	113
purcebl01	1882	1	BFN	NL	2	1	6	3	2	0	0	93	44	17	2	4	9	0.33	4.94		2		0	134	2	30
radboch01	1882	1	PRO	NL	33	20	55	52	51	6	0	1422	429	110	6	51	201	0.22	2.09		23		0	1948	3	215
reccijo01	1882	1	LS2	AA	4	6	13	10	9	1	0	285	106	32	3	22	31		3.03		0		0	0	3	70
reynoch01	1882	1	PH4	AA	1	1	2	2	1	0	0	36	18	7	0	3	4		5.25		0		0	0	0	11
richmle01	1882	1	WOR	NL	14	33	48	46	44	0	0	1233	525	171	11	88	123	0.29	3.74		26		0	1876	2	343
robinya01	1882	1	DTN	NL	0	0	1	0	0	0	0	6	0	0	0	1	0	0	0		0		0	8	1	0
roweda01	1882	1	CL2	NL	0	1	1	1	1	0	0	27	29	12	3	7	0	0.49	12		3		0	66	0	35
russjo01	1882	1	BL2	AA	0	1	1	1	0	0	0	15	10	4	0	1	0		7.2		0		0	0	0	6
salisha01	1882	1	PT1	AA	20	18	38	38	38	1	0	1005	315	98	1	37	135		2.63		0		0	0	0	188
schapjo01	1882	1	SL4	AA	8	7	15	14	13	0	0	384	131	50	2	32	38		3.52		0		0	0	1	99
schenbi01	1882	1	LS2	AA	1	0	2	1	1	0	0	30	6	1	0	1	4		0.9		0		0	0	1	2
seymoja01	1882	1	PT1	AA	0	1	1	1	1	0	0	24	16	7	0	2	2		7.88		5		0	43	0	13
snydege01	1882	1	PH4	AA	1	0	1	1	1	0	0	27	4	0	0	2	0		0		0		0	0	0	3
striccu01	1882	1	PH4	AA	1	0	2	0	0	0	0	21	3	1	0	1	2		1.29		0		0	0	2	1
sweenbi01	1882	1	PH4	AA	9	10	20	20	18	0	0	510	178	55	4	42	48		2.91		0		0	0	0	119
taylobi01	1882	1	PT1	AA	0	1	1	0	0	0	0	15	11	9	0	4	1		16.2		0		0	0	1	10
wardjo01	1882	1	PRO	NL	19	12	33	32	29	4	1	834	261	80	6	36	72	0.23	2.59		13		0	1159	1	141
weavesa01	1882	1	PH4	AA	26	15	42	41	41	2	0	1113	374	113	6	35	104		2.74		0		0	0	1	182
welchmi01	1882	1	TRN	NL	14	16	33	33	30	5	0	843	334	108	7	62	53	0.28	3.46		15		0	1256	0	221
wheelha01	1882	1	CN2	AA	1	2	4	1	1	0	0	65	21	13	0	12	10		5.4		0		0	0	3	17
whitewi01	1882	1	CN2	AA	40	12	54	54	52	8	0	1440	411	82	3	71	122		1.54		14		0	1900	0	164
whitnar01	1882	2	DTN	NL	0	1	3	2	1	0	0	54	31	12	1	8	11	0.37	6		1		0	91	1	17
whitnji01	1882	1	BSN	NL	24	21	49	48	46	3	0	1260	404	123	3	41	180	0.23	2.64		29		0	1743	1	229
wiedmst01	1882	1	DTN	NL	25	20	46	45	43	4	0	1233	391	120	10	39	161	0.23	2.63		8		0	1697	1	204
willine01	1882	1	CHN	NL	0	0	1	0	0	0	0	9	9	2	1	1	0	0.5	6		0		0	19	1	8
wisebi01	1882	1	BL2	AA	1	2	3	3	3	0	0	78	30	8	1	4	9		2.77		0		0	0	0	14
wolfji01	1882	1	LS2	AA	0	0	1	0	0	0	0	18	11	6	0	3	1		9		0		0	0	1	11
allenmy01	1883	1	NY1	NL	0	1	1	1	1	0	0	24	8	1	0	3	0	0.27	1.13		1		0	32	0	5
ansonca01	1883	1	CHN	NL	0	0	2	0	0	0	1	9	1	0	0	1	0	0.09	0		0		0	12	2	1
bakelje01	1883	1	PH4	AA	5	3	8	8	7	0	0	184	65	22	0	12	14		3.23		0		0	0	0	47
bakerno01	1883	1	PT1	AA	0	2	3	3	2	0	0	57	24	7	0	11	5		3.32		0		0	0	0	16
barrbo01	1883	1	PT1	AA	6	18	26	23	19	0	1	610	263	99	5	28	81		4.38		0		0	1029	3	166
battijo01	1883	1	PT1	AA	0	0	2	0	0	0	0	12	9	1	0	1	0		2.25		0		0	0	1	4
bradlge01	1883	2	PH4	AA	16	7	26	23	22	0	0	643	215	75	7	22	56		3.15		0		0	927	3	129
breital01	1883	1	PHI	NL	0	1	1	1	0	0	0	15	8	5	0	2	0	0.32	9		1		0	27	0	9
broutda01	1883	1	BFN	NL	0	0	1	0	0	0	0	6	9	7	0	3	2	0.64	31.5		0		0	17	0	7
brownto01	1883	1	CL5	AA	0	1	3	1	1	0	0	42	14	9	0	10	6		5.79		0		0	0	2	17
buffich01	1883	1	BSN	NL	25	14	43	41	34	4	1	999	346	112	4	51	188	0.25	3.03		17		0	1444	3	187
burkeja01	1883	1	BFN	NL	0	0	1	1	0	0	0	24	9	5	0	3	1	0.24	5.63		0		0	40	0	8
burnsdi01	1883	1	DTN	NL	2	12	17	13	13	0	0	383	172	64	8	33	30	0.3	4.51		6		0	604	4	122
cadych01	1883	1	CL2	NL	0	1	1	1	1	0	0	24	13	7	0	4	5	0.36	7.88		3		0	40	0	13
colemjo01	1883	1	PHI	NL	12	48	65	61	59	3	0	1615	772	291	17	48	159	0.3	4.87		9		0	2546	4	510
corcola01	1883	1	CHN	NL	34	20	56	53	51	3	0	1421	483	131	7	82	216	0.24	2.49		19		0	2041	3	281
coreyfr01	1883	1	PH4	AA	10	7	18	16	15	0	0	445	182	56	3	24	42		3.4		0		0	0	2	106
cushmed01	1883	1	BFN	NL	3	3	7	7	5	0	0	151	61	22	0	17	34	0.28	3.93		4		0	231	1	41
dailyhu01	1883	1	CL2	NL	23	19	45	43	40	4	1	1136	360	102	5	99	171	0.24	2.42		23		0	1578	2	193
deaglre01	1883	1	CN2	AA	10	8	18	18	17	1	0	444	136	38	0	34	48		2.31		0		0	637	0	78
derbyge01	1883	1	BFN	NL	2	10	14	13	12	0	1	323	173	70	3	15	34	0.33	5.85		5		0	533	1	120
devinji01	1883	1	BL2	AA	1	1	2	2	1	0	0	33	15	9	0	1	3		7.36		0		0	0	0	15
dolanto01	1883	1	SL4	AA	0	0	1	0	0	0	0	12	4	2	0	0	0		4.5		0		0	0	1	3
dorgami01	1883	1	NY1	NL	0	1	1	1	1	0	0	21	8	3	0	6	3	0.28	3.86		1		0	34	0	7
driscde01	1883	1	PT1	AA	18	21	41	40	35	1	0	1009	427	149	3	39	79		3.99		0		0	1489	1	239
dundoed01	1883	1	CL5	AA	3	16	20	19	16	0	0	500	213	83	7	38	31		4.48		0		0	768	1	153
emslibo01	1883	1	BL2	AA	9	13	24	23	21	1	0	604	188	71	3	41	62		3.17		12		0	877	1	149
evansja01	1883	1	CL2	NL	0	0	1	0	0	0	0	9	0	0	0	0	1	0	0		0		0	9	1	0
fergubo01	1883	1	PHI	NL	0	0	1	0	0	0	0	3	2	1	0	0	0	0.28	9		0		0	7	1	2
foleycu01	1883	1	BFN	NL	1	0	1	0	0	0	0	3	0	0	0	4	0	0	0		0		0	6	1	0
foxjo01	1883	1	BL2	AA	6	13	20	19	18	0	0	496	209	74	2	32	49		4.03		0		0	804	1	140
friespe01	1883	1	CL5	AA	0	3	3	3	3	0	0	75	34	18	1	14	7		6.48		0		0	0	0	31
gallabi01	1883	1	BL2	AA	0	5	7	5	4	0	0	155	79	31	0	6	19		5.4		0		0	0	2	57
galvipu01	1883	1	BFN	NL	46	29	76	75	72	5	0	1969	676	198	9	50	279	0.25	2.72		28		0	2741	1	367
gardngi01	1883	1	BL2	AA	1	0	2	0	0	0	0	21	9	4	1	1	2		5.14		0		0	0	1	7
goldsfr01	1883	1	CHN	NL	25	19	46	45	40	2	0	1150	456	134	14	39	82	0.27	3.15		11		1	1683	1	256
haganar01	1883	1	PHI	NL	1	14	17	16	15	0	0	411	207	83	2	33	39	0.34	5.45		22		0	639	1	151
haganar01	1883	2	BFN	NL	0	2	2	2	1	0	0	45	17	6	0	6	7	0.27	3.6		3		0	69	0	12
heckegu01	1883	1	LS2	AA	26	23	51	50	49	3	0	1353	509	167	4	72	153		3.33		0		0	1993	1	287
hendeha01	1883	1	PHI	NL	0	1	1	1	1	0	0	27	26	19	0	2	2	0.48	19		4		0	56	0	24
hendeha01	1883	2	BL2	AA	10	32	45	42	38	0	0	1075	383	160	4	87	145		4.02		0		0	1705	3	315
hilsech01	1883	1	PHI	NL	0	3	3	3	3	0	0	78	36	16	1	4	8	0.3	5.54		1		0	122	0	26
hodnech01	1883	1	SL4	AA	2	2	4	4	3	0	0	96	28	5	1	7	6		1.41		0		0	0	0	10
huntele01	1883	1	CL2	NL	0	0	1	0	0	0	0	19	10	1	0	2	4	0.37	1.42		0		0	27	1	7
jonesja02	1883	1	DTN	NL	6	5	12	12	9	1	0	278	103	36	0	19	33	0.25	3.5		4		0	416	0	63
jonesja02	1883	2	PH4	AA	5	2	7	7	7	0	0	195	58	19	1	6	28		2.63		0		0	0	0	38
keefeti01	1883	1	NY4	AA	41	27	68	68	68	5	0	1857	486	166	6	98	361		2.41		26		0	2418	0	244
kellyki01	1883	1	CHN	NL	0	0	1	0	0	0	0	3	1	0	0	0	0	0.33	0		0		0	3	1	0
lilliji01	1883	1	BFN	NL	0	1	3	0	0	0	0	36	16	4	0	2	4	0.3	3		2		0	55	3	12
lynchja01	1883	1	NY4	AA	13	15	29	29	29	1	0	765	263	116	6	25	119		4.09		15		0	1040	0	161
manseto01	1883	1	DTN	NL	0	0	1	0	0	0	0	20	21	14	2	5	3	0.55	18.9		1		0	43	1	18
mathebo01	1883	1	PH4	AA	30	13	44	44	41	1	0	1143	396	104	11	31	203		2.46		0		0	1649	0	224
mccorha01	1883	1	CN2	AA	8	6	15	15	14	1	0	386	139	41	1	27	21		2.87		0		0	575	0	70
mccorji01	1883	1	CL2	NL	28	12	43	41	36	1	1	1026	316	70	1	65	145	0.23	1.84		11		0	1421	2	151
mcginju01	1883	1	SL4	AA	28	16	45	45	41	6	0	1148	325	99	3	69	128		2.33		0		0	1564	0	174
mcintfr01	1883	1	DTN	NL	1	0	1	1	1	0	0	33	11	1	0	1	0	0.23	0.82		0		0	48	0	10
mcintfr01	1883	2	CL5	AA	1	1	2	2	2	0	0	57	20	11	0	7	6		5.21		2		0	87	0	19
mclaufr01	1883	1	PT1	AA	0	0	2	0	0	0	0	27	14	13	0	3	1		13		0		0	0	2	21
morrijo01	1883	1	BSN	NL	1	0	2	1	1	0	0	39	15	4	0	4	5	0.26	2.77		0		0	60	1	11
mountbi01	1883	1	CN2	AA	0	1	1	1	1	0	0	24	9	2	0	2	3		2.25		0		0	31	0	4
mountfr01	1883	1	CL5	AA	26	33	59	59	57	4	0	1509	546	201	8	123	159		3.6		0		0	2177	0	345
mullato01	1883	1	SL4	AA	35	15	53	49	49	3	1	1382	372	112	3	74	191		2.19		0		0	1841	4	222
neaglja01	1883	1	PHI	NL	1	7	8	7	6	0	0	184	88	47	0	21	13	0.31	6.9		9		0	300	1	77
neaglja01	1883	2	BL2	AA	1	4	6	5	4	0	0	138	48	25	1	20	9		4.89		0		0	0	1	48
neaglja01	1883	3	PT1	AA	3	12	16	16	12	0	0	342	156	74	9	25	41		5.84		0		0	0	0	123
nolanth01	1883	1	PT1	AA	0	7	7	7	6	0	0	165	81	26	0	10	23		4.25		0		0	0	0	44
oneilti01	1883	1	NY1	NL	5	12	19	19	15	0	0	444	182	67	5	64	55	0.28	4.07		33		0	694	0	129
orourji01	1883	1	BFN	NL	0	0	2	0	0	0	1	21	10	5	0	1	1	0.35	6.43		1		0	29	1	9
purcebl01	1883	1	PHI	NL	2	6	11	9	7	0	0	240	110	39	0	12	30	0.3	4.39		7		0	371	0	71
radboch01	1883	1	PRO	NL	48	25	76	68	66	4	1	1897	563	144	7	56	315	0.22	2.05		36		0	2540	8	275
radboge01	1883	1	DTN	NL	1	2	3	3	2	0	0	66	38	16	1	7	2	0.34	6.55		5		0	117	0	28
reccijo01	1883	1	LS2	AA	0	0	1	0	0	0	0	12	10	1	0	0	0		2.25		0		0	0	1	3
richmle01	1883	1	PRO	NL	3	7	12	12	8	0	0	276	122	34	2	27	13	0.31	3.33		6		0	416	0	67
roweda01	1883	1	BL2	AA	0	0	1	0	0	0	0	12	12	9	1	2	1		20.25		0		0	0	1	11
sawyewi01	1883	1	CL2	NL	4	10	17	15	15	0	0	423	119	37	1	47	76	0.21	2.36		13		0	596	2	79
shawdu01	1883	1	DTN	NL	10	15	26	25	23	1	0	681	238	63	3	44	73	0.25	2.5		6		0	974	1	135
smithed01	1883	2	PHI	NL	0	1	1	1	0	0	0	21	18	12	0	3	2	0.4	15.43		1		0	47	1	17
smithpo01	1883	1	CL5	AA	0	0	3	0	0	0	0	17	10	4	0	0	0		6.35		0		0	30	3	7
sommejo01	1883	1	CN2	AA	0	0	1	0	0	0	0	15	9	3	0	1	2		5.4		0		0	0	1	6
stoveha01	1883	1	PH4	AA	0	0	1	0	0	0	0	9	5	3	0	0	4		9		0		0	0	1	3
sweench01	1883	1	PRO	NL	7	7	20	18	14	0	0	440	142	51	3	28	48	0.23	3.13		17		0	626	2	94
taylobi01	1883	1	PT1	AA	4	7	19	9	8	0	0	381	166	76	4	34	41		5.39		0		0	580	9	115
valenjo01	1883	1	CL5	AA	2	10	13	12	11	0	0	306	130	40	0	17	13		3.53		0		0	501	1	80
wardjo01	1883	1	NY1	NL	16	13	34	25	24	1	0	831	278	83	3	31	121	0.24	2.7		19		0	1159	9	165
weavesa01	1883	1	LS2	AA	26	22	48	48	47	4	0	1256	468	172	3	38	116		3.7		0		0	1776	0	272
welchmi01	1883	1	NY1	NL	25	23	54	52	46	4	0	1278	431	129	11	66	144	0.24	2.73		27		0	1829	2	271
wheelha01	1883	1	CL5	AA	0	1	1	1	0	0	0	15	13	4	0	2	0		7.2		0		0	0	0	7
whitewi01	1883	1	CN2	AA	43	22	65	64	64	6	0	1731	473	134	16	104	141		2.09		0		0	2320	1	255
whitnji01	1883	1	BSN	NL	37	21	62	56	54	1	2	1542	492	128	7	35	345	0.23	2.24		37		0	2101	5	258
wiedmst01	1883	1	DTN	NL	20	24	52	47	41	3	2	1207	435	158	8	72	183	0.25	3.53		11		0	1762	5	265
willine01	1883	1	CHN	NL	0	0	1	0	0	0	0	3	1	1	0	1	1	0.16	9		0		0	7	0	2
woodge01	1883	1	DTN	NL	0	0	1	0	0	0	0	15	8	4	0	3	0	0.34	7.2		1		0	26	1	9
andrufr01	1884	1	CHN	NL	1	0	1	1	1	0	0	27	11	2	1	2	2	0.29	2		0	0	0	39	0	3
ansonca01	1884	1	CHN	NL	0	1	1	0	0	0	0	3	3	2	2	1	1	0.37	18		0	0	0	9	1	4
arundha01	1884	1	PRO	NL	1	0	1	1	1	0	0	27	8	1	0	4	4	0.25	1		1	0	0	36	0	2
atkinal01	1884	1	PH4	AA	11	11	22	22	20	1	0	552	186	86	3	21	93		4.21		0	10	0	792	0	130
atkinal01	1884	2	CHU	UA	6	10	16	16	16	1	0	420	127	43	1	21	104		2.76		0		0		0	52
atkinal01	1884	3	BLU	UA	3	5	8	8	8	0	0	209	60	18	4	12	50		2.33		0		0		0	34
aydelja01	1884	1	IN2	AA	5	7	12	12	11	0	0	318	129	58	0	29	30		4.92		0	0	0	487	0	100
bakelje01	1884	1	PHU	UA	14	25	39	38	38	1	0	1034	390	171	0	76	204		4.47		0		0		1	305
bakelje01	1884	2	WIL	UA	0	2	2	2	2	0	0	51	24	8	0	1	9		4.24		0		0		0	17
bakelje01	1884	3	KCU	UA	2	3	5	5	3	0	0	99	29	9	0	4	13		2.45		0		0		0	16
baldwla01	1884	1	MLU	UA	1	1	2	2	2	0	0	51	7	5	0	1	21		2.65		0		0		0	5
barrbo01	1884	1	WS7	AA	9	23	32	32	32	2	0	843	311	108	9	31	138		3.46		0	13	0	1248	0	210
barrbo01	1884	2	IN2	AA	3	11	16	16	15	0	0	396	160	73	2	19	69		4.98		0	5	0	605	0	117
bastich01	1884	1	WIL	UA	0	0	1	0	0	0	0	18	6	2	0	0	2		3		0		0		1	5
baueral01	1884	1	CL5	AA	1	2	3	3	3	0	0	75	22	13	1	14	13		4.68		0	0	0	112	0	21
becanbu01	1884	1	NY4	AA	1	0	1	1	1	0	0	18	2	1	0	2	2		1.5		0	0	0	24	0	2
beckfr01	1884	1	PT1	AA	0	3	3	3	3	0	0	75	33	17	0	6	11		6.12		0	5	0	119	0	29
beckfr01	1884	2	BLU	UA	0	2	2	2	1	0	0	27	17	8	0	4	7		8		0		0		0	13
begleed01	1884	1	NY1	NL	12	18	31	30	30	0	0	798	296	123	9	99	104	0.26	4.16		33	0	0	1223	1	209
blackbo01	1884	1	KCU	UA	4	9	16	15	13	0	0	369	127	44	1	17	93		3.22		0		0		1	79
blaisdi01	1884	1	KCU	UA	0	3	3	3	3	0	0	78	49	25	0	4	8		8.65		0		0		0	39
bondto01	1884	1	BSU	UA	13	9	23	21	19	0	0	567	185	63	3	14	128		3		0		0		2	120
bondto01	1884	2	IN2	AA	0	5	5	5	5	0	0	129	62	27	5	4	15		5.65		0	2	0	206	0	51
boylehe01	1884	1	SLU	UA	15	3	19	16	16	2	1	450	118	29	3	10	88		1.74		0		0		3	63
bradlge01	1884	1	CNU	UA	25	15	41	38	36	3	0	1026	350	103	7	23	168		2.71		0		0		3	203
brillfr01	1884	1	DTN	NL	2	10	12	12	12	1	0	309	148	63	7	26	18	0.31	5.5		4	0	0	500	0	98
browned01	1884	1	TL1	AA	0	1	1	1	1	0	0	27	19	9	0	4	1		9		0	1	0	53	0	16
brownji01	1884	1	ALT	UA	1	9	11	11	7	0	0	222	99	44	0	36	39		5.35		0		0		0	80
brownji01	1884	2	NY1	NL	0	1	1	1	1	0	0	27	10	5	0	8	2	0.26	5		2	0	0	46	0	9
brownji01	1884	3	SPU	UA	1	4	6	6	4	1	0	108	43	15	1	14	20		3.75		0		0		0	34
brownjo01	1884	1	CHN	NL	4	2	7	6	5	0	0	150	56	26	4	7	27	0.25	4.68		1	0	0	224	1	36
brownle01	1884	1	BSU	UA	0	0	1	0	0	0	1	3	6	4	0	1	0		36		0		0		1	7
brownpe01	1884	1	LS2	AA	0	1	1	1	0	0	0	1	2	2	0	2	0		54		0	1	0	5	0	3
brownto01	1884	1	CL5	AA	2	1	4	0	0	0	0	57	27	15	0	7	5		7.11		0	0	0	103	4	24
buffich01	1884	1	BSN	NL	48	16	67	67	63	8	0	1761	506	140	15	76	417	0.21	2.15		24	0	0	2383	0	225
burkeja01	1884	1	BSU	UA	19	15	38	36	34	0	0	966	326	102	10	31	255		2.85		0		0		2	201
burnsdi01	1884	1	CNU	UA	23	15	40	40	34	1	0	989	298	90	7	47	167		2.46		0		0		0	179
burnsoy01	1884	2	BL2	AA	0	0	2	0	0	0	1	27	12	3	0	2	6		3		0	0	0	37	2	5
cadych01	1884	1	CHU	UA	3	1	4	4	4	0	0	105	37	11	0	13	15		2.83		0		0		0	25
cahiljo01	1884	1	CL5	AA	1	0	2	1	1	0	0	48	15	9	0	4	1		5.06		0	3	0	78	1	15
carutbo01	1884	1	SL4	AA	7	2	13	7	7	0	0	248	61	24	1	15	58		2.61		0	3	0	341	6	34
caseyda01	1884	1	WIL	UA	1	1	2	2	2	0	0	54	23	2	0	4	10		1		0		0		0	17
cattajo01	1884	1	PRO	NL	0	0	1	1	0	0	0	15	2	5	0	4	2	0.1	9		3	0	0	24	0	7
cattajo01	1884	2	SLU	UA	1	1	2	2	2	0	0	51	12	4	0	4	13		2.12		0		0		0	10
chattji01	1884	1	KCU	UA	0	1	1	1	0	0	0	15	11	2	0	2	2		3.6		0		0		0	7
clarkjo01	1884	1	CHN	NL	10	3	14	13	12	0	0	354	94	28	10	25	102	0.2	2.14		7	0	0	478	1	64
colemjo01	1884	1	PHI	NL	5	15	21	19	14	1	0	463	216	84	9	22	37	0.3	4.9		8	0	0	724	2	147
colemjo01	1884	2	PH4	AA	0	2	3	2	2	0	0	63	28	8	0	2	5		3.43		0	4	0	98	1	14
comisch01	1884	1	SL4	AA	0	0	1	0	0	0	0	12	1	1	0	0	4		2.25		0	0	0	17	1	1
conleed01	1884	1	PRO	NL	4	4	8	8	8	1	0	213	63	17	4	22	33	0.22	2.15		7	0	0	304	0	47
connojo01	1884	1	ALT	UA	0	1	1	1	1	0	0	27	18	7	0	5	0		7		0		0		0	14
connojo01	1884	2	KCU	UA	0	1	2	1	1	0	0	36	24	6	1	0	1		4.5		0		0		1	14
connojo02	1884	1	BSN	NL	1	4	7	7	7	0	0	180	70	21	1	18	29	0.27	3.15		3	0	0	273	0	44
conwaji01	1884	1	BR3	AA	3	9	13	13	10	0	0	316	132	52	4	15	25		4.44		0	3	0	474	0	84
corcoja01	1884	1	BR3	AA	0	0	1	0	0	0	0	3	0	0	0	1	0		0		0	0	0	5	1	0
corcola01	1884	1	CHN	NL	35	23	60	59	57	7	0	1550	473	138	35	116	272	0.22	2.4		27	0	0	2180	1	286
corcomi01	1884	1	CHN	NL	0	1	1	1	1	0	0	27	16	4	1	7	2	0.37	4		5	0	0	50	0	14
corkhpo01	1884	1	CN2	AA	1	0	1	0	0	0	0	15	1	1	0	2	4		1.8		0	0	0	18	1	1
coughed01	1884	1	BFN	NL	0	0	1	0	0	0	0	0	3	0	0	0	0	0.6			2	0	0	5	0	4
craneed01	1884	1	BSU	UA	0	2	4	2	1	0	0	54	17	8	1	6	13		4		0		0		2	14
crosbge01	1884	1	CHN	NL	1	2	3	3	3	0	0	84	27	11	3	12	11	0.22	3.54		4	0	0	131	0	21
crothdo01	1884	1	KCU	UA	1	2	3	3	3	0	0	75	26	5	0	6	11		1.8		0		0		0	15
cudwoji01	1884	1	KCU	UA	0	0	2	1	1	0	0	51	19	8	1	3	6		4.24		0		0		1	16
currywe01	1884	1	RIC	AA	0	2	2	2	2	0	0	48	15	9	2	3	1		5.06		0	1	0	72	0	14
cushmed01	1884	1	MLU	UA	4	0	4	4	4	2	0	108	10	4	0	3	47		1		0		0		0	4
dailyhu01	1884	1	CHU	UA	27	27	56	56	54	5	0	1454	430	131	11	71	469		2.43		0		0		0	217
dailyhu01	1884	2	WSU	UA	1	1	2	2	2	0	0	48	16	4	0	1	14		2.25		0		0		0	11
daniech01	1884	1	BSU	UA	0	2	2	2	2	0	0	50	20	8	0	2	12		4.32		0		0		0	14
davisda01	1884	1	SL4	AA	10	12	25	24	20	1	0	595	196	64	1	35	143		2.9		0	14	0	837	1	113
davisda01	1884	2	BSN	NL	1	3	4	4	3	0	0	93	50	27	2	8	13	0.35	7.84		2	0	0	149	0	36
deaglre01	1884	1	CN2	AA	3	1	4	4	4	1	0	102	39	19	0	9	12		5.03		0	1	0	131	0	26
deaglre01	1884	2	LS2	AA	4	6	12	12	8	0	0	262	80	25	0	13	23		2.58		0	7	0	356	0	43
dorgami01	1884	1	NY1	NL	8	6	14	14	12	0	0	339	98	44	5	51	90	0.21	3.5		21	0	1	507	0	84
dorseje01	1884	1	BLU	UA	0	1	1	1	0	0	0	12	7	4	1	0	3		9		1		0		0	8
drewda01	1884	1	PHU	UA	0	1	1	0	0	0	0	21	7	3	0	0	2		3.86		0		0		1	5
driscde01	1884	1	LS2	AA	6	6	13	13	10	0	0	306	110	39	3	7	16		3.44		0	2	0	446	0	69
duganed01	1884	1	RIC	AA	5	14	20	20	20	0	0	499	196	83	5	15	60		4.49		0	2	0	751	0	137
dundoed01	1884	1	CL5	AA	6	4	11	9	7	0	0	243	85	34	9	15	37		3.78		0	0	0	356	2	55
dunlafr01	1884	1	SLU	UA	0	0	1	0	0	0	1	2	2	1	0	0	1		13.5		0		0		1	1
edench01	1884	1	PT1	AA	0	1	2	1	1	0	0	36	12	8	1	3	3		6		0	1	0	51	1	9
elybo01	1884	1	BFN	NL	0	1	1	1	0	0	0	15	17	8	1	5	4	0.5	14.4		1	0	0	39	0	15
emslibo01	1884	1	BL2	AA	32	17	50	50	50	4	0	1366	419	139	5	88	264		2.75		43	14	0	1936	0	241
ewingbu01	1884	1	NY1	NL	0	1	1	1	1	0	0	24	7	1	0	4	3	0.24	1.13		0	0	0	33	0	3
ferguch01	1884	1	PHI	NL	21	25	50	47	46	2	1	1250	443	164	13	93	194	0.25	3.54		33	0	0	1844	3	297
firthte01	1884	1	RIC	AA	0	1	1	1	1	0	0	27	14	8	0	5	0		8		0	0	0	48	0	13
fishe01	1884	1	PHU	UA	1	7	8	8	8	0	0	212	76	28	0	13	42		3.57		0		0		0	49
fogarji01	1884	1	PHI	NL	0	0	1	0	0	0	0	3	2	0	0	0	1	0.33	0		1	0	0	6	1	2
foremfr01	1884	1	CHU	UA	1	2	3	3	1	0	0	54	23	8	0	2	10		4		0		0		0	17
foremfr01	1884	2	KCU	UA	0	1	1	1	1	0	0	24	17	5	0	2	5		5.63		0		0		0	12
foutzda01	1884	1	SL4	AA	15	6	25	25	19	2	0	620	167	50	7	36	95		2.18		0	9	0	833	0	100
foxjo01	1884	1	PT1	AA	1	6	7	7	7	0	0	177	76	37	2	16	22		5.64		0	3	0	280	0	59
gagusch01	1884	1	WSU	UA	10	9	23	21	19	0	0	532	143	50	2	38	156		2.54		0		0		2	100
gallabi01	1884	1	PHU	UA	1	2	3	3	3	0	0	75	32	9	3	4	12		3.24		0		0		0	29
galvilo01	1884	1	SPU	UA	0	2	3	3	3	0	0	75	21	8	0	10	17		2.88		0		0		0	18
galvipu01	1884	1	BFN	NL	46	22	72	72	71	12	0	1909	566	141	23	63	369	0.22	1.99		16	0	0	2554	0	254
gardngi01	1884	2	CHU	UA	0	1	1	1	0	0	0	18	10	4	0	1	4		6		0		0		0	8
geerbi01	1884	2	BR3	AA	0	0	2	0	0	0	0	15	14	7	0	3	1		12.6		0	0	0	26	2	12
geisbi01	1884	1	DTN	NL	0	0	1	0	0	0	0	15	14	8	0	2	1	0.42	14.4		0	0	0	35	1	16
getzich01	1884	1	DTN	NL	5	12	17	17	17	1	0	442	118	32	2	25	107	0.2	1.95		9	0	0	604	0	73
glassja01	1884	1	CL2	NL	0	0	2	0	0	0	0	15	8	3	0	2	1	0.33	5.4		1	0	0	26	2	6
goldsfr01	1884	1	CHN	NL	9	11	21	21	20	1	0	564	245	89	11	29	34	0.29	4.26		10	0	0	852	0	141
goldsfr01	1884	2	BL2	AA	3	1	4	4	3	0	0	90	29	9	0	2	11		2.7		0	1	0	125	0	12
gormaja01	1884	2	PT1	AA	1	2	3	3	3	0	0	75	22	13	0	5	10		4.68		0	1	0	110	0	20
haganar01	1884	1	BFN	NL	1	2	3	3	3	0	0	78	53	17	1	4	4	0.38	5.88		0	0	0	142	0	38
hamiljo01	1884	1	WS7	AA	2	17	19	19	18	1	0	470	197	78	8	43	50		4.48		0	5	0	735	0	158
harkijo01	1884	1	CL2	NL	12	32	46	45	42	3	0	1173	399	160	7	108	192	0.24	3.68		48	0	0	1709	1	300
heckegu01	1884	1	LS2	AA	52	20	75	73	72	6	0	2012	526	134	4	56	385		1.8		0	16	0	2649	2	230
hendeha01	1884	1	BL2	AA	27	23	52	52	50	4	0	1318	382	128	9	116	346		2.62		0	16	0	1900	0	235
henryjo01	1884	1	CL2	NL	1	4	5	5	5	1	0	126	46	17	2	26	23	0.25	3.64		4	0	2	205	0	39
hibbajo01	1884	1	CHN	NL	1	1	2	2	2	1	0	51	18	5	1	9	4	0.3	2.65		0	0	0	69	0	10
hickmer01	1884	1	KCU	UA	4	13	17	17	15	0	0	412	172	69	5	36	68		4.52		0		0		0	146
hilsech01	1884	1	PH4	AA	2	1	3	3	3	0	0	81	29	14	0	5	10		4.67		0	0	0	118	0	19
hinespa01	1884	1	PRO	NL	0	0	1	0	0	0	0	3	3	0	0	0	0	0.5	0		1	0	0	6	0	1
hodnech01	1884	1	SLU	UA	12	2	14	14	12	1	0	363	121	27	0	16	41		2.01		0		0		0	56
horanjo01	1884	1	CHU	UA	3	6	13	10	9	0	0	294	94	38	0	24	55		3.49		0		0		3	73
housech01	1884	1	CHU	UA	0	0	2	0	0	0	0	9	4	1	0	0	3		3		0		0		2	3
hutchbi01	1884	1	KCU	UA	1	1	2	2	2	0	0	51	14	5	0	1	5		2.65		0		0		0	11
irwinar01	1884	1	PRO	NL	0	0	1	0	0	0	0	9	5	1	0	1	0	0.35	3		0	0	0	15	1	2
keefeti01	1884	1	NY4	AA	37	17	58	58	56	4	0	1449	380	121	11	71	334	0.2	2.25		0	15	0	1950	0	195
keenaji01	1884	1	IN2	AA	0	0	1	0	0	0	0	9	2	1	0	0	0		3		0	0	0	11	1	1
kellyki01	1884	1	CHN	NL	0	1	2	0	0	0	0	16	12	5	2	2	1	0.4	8.44		2	0	0	32	0	11
kented01	1884	1	TL1	AA	0	1	1	1	1	0	0	27	14	6	0	3	4		6		0	1	0	51	0	11
kimbesa01	1884	1	BR3	AA	18	20	41	41	41	4	0	1084	364	153	6	72	122		3.81		0	15	0	1559	0	240
kirbyjo01	1884	1	KCU	UA	0	1	2	2	1	0	0	33	13	5	0	2	1		4.09		0		0		0	10
knighjo01	1884	1	PHI	NL	2	4	6	6	6	0	0	153	66	31	2	21	8	0.29	5.47		2	0	0	246	0	53
knighlo01	1884	1	PH4	AA	0	1	2	1	1	0	0	42	24	14	0	4	2		9		0	1	0	74	1	19
kreegfr01	1884	1	KCU	UA	0	1	1	1	0	0	0	21	9	0	0	5	3		0		0		0		0	8
lauerch01	1884	1	PT1	AA	0	2	3	3	2	0	0	57	23	16	0	9	8		7.58		0	3	0	95	0	25
learyja01	1884	1	ALT	UA	0	3	3	3	2	0	0	72	31	14	0	2	7		5.25		0		0		0	30
learyja01	1884	2	CHU	UA	0	2	2	1	1	0	0	30	14	6	0	5	6		5.4		0		0		1	14
leeto01	1884	1	CHN	NL	1	4	5	5	5	0	0	136	55	19	12	15	14	0.27	3.77		2	0	0	217	0	43
leeto01	1884	2	BLU	UA	5	8	15	14	12	0	0	366	121	46	1	29	81		3.39		0		0		1	88
lilliji01	1884	1	BFN	NL	0	1	2	1	0	0	0	39	22	9	0	5	4	0.32	6.23		1	0	0	73	1	24
lockwmi01	1884	1	WSU	UA	1	9	11	10	6	0	0	203	99	56	4	15	48		7.45		0		0		0	95
lynchja01	1884	1	NY4	AA	37	15	55	54	54	5	0	1488	420	147	10	42	292		2.67		0	10	0	2002	1	226
lynchto02	1884	1	CHN	NL	0	0	1	1	0	0	0	21	7	2	1	3	2	0.24	2.57		0	0	0	32	0	4
macarma01	1884	1	IN2	AA	1	5	6	6	6	0	0	156	57	29	1	21	19		5.02		0	2	0	240	0	49
mathebo01	1884	1	PH4	AA	30	18	49	49	48	3	0	1292	401	159	10	49	286		3.32		0	12	0	1788	0	238
mattecv01	1884	1	SLU	UA	1	0	1	1	0	0	0	18	9	6	1	3	3		9		0		0		0	11
maulal01	1884	1	PHU	UA	0	1	1	1	1	0	0	24	10	4	0	1	7		4.5		0		0		0	7
mccarto01	1884	1	BSU	UA	0	7	7	6	5	0	0	168	73	30	2	14	18		4.82		0		0		1	53
mccaual01	1884	1	IN2	AA	2	7	10	9	9	0	0	228	87	43	2	25	34		5.09		0	0	0	358	1	74
mccorje01	1884	1	PHU	UA	0	0	1	0	0	0	0	6	5	2	1	0	3		9		0		0		1	4
mccorji01	1884	1	CL2	NL	19	22	42	41	39	3	0	1077	357	114	17	75	182	0.24	2.86		12	0	0	1518	1	206
mccorji01	1884	2	CNU	UA	21	3	24	24	24	7	0	630	151	36	3	14	161		1.54		0		0		0	57
mcelrji01	1884	1	PHI	NL	1	12	13	13	13	0	0	333	115	60	1	54	45	0.25	4.86		46	0	0	507	0	112
mcelrji01	1884	2	WIL	UA	0	1	1	1	0	0	0	15	10	6	0	0	3		10.8		0		0		0	6
mcfarch01	1884	1	BLU	UA	0	1	1	1	0	0	0	9	9	5	1	1	3		15		0		0		0	10
mcginju01	1884	1	SL4	AA	24	16	40	40	39	5	0	1063	331	112	4	35	141		2.84		0	12	0	1466	0	196
mckeola01	1884	1	IN2	AA	18	41	61	60	59	2	0	1536	488	199	20	94	308		3.5		0	18	0	2185	1	350
mclauba01	1884	1	KCU	UA	1	3	7	4	4	0	0	146	62	29	2	15	14		5.36		0		0		3	44
mclaufr01	1884	3	KCU	UA	0	0	2	1	0	0	0	30	15	6	0	2	3		5.4		0		0		1	12
mclauji01	1884	1	BL2	AA	1	2	3	2	2	0	0	66	27	9	2	11	8		3.68		0	0	0	101	1	22
mcsortr01	1884	1	TL1	AA	0	0	1	0	0	0	0	6	5	1	0	0	1		4.5		0	0	0	9	1	2
meegape01	1884	1	RIC	AA	7	12	22	22	22	1	0	537	177	86	7	29	106		4.32		0	14	0	763	0	130
meinkfr01	1884	1	DTN	NL	8	23	35	31	31	1	0	867	341	102	10	63	124	0.27	3.18		15	0	0	1303	4	217
millecy01	1884	1	CHU	UA	1	0	1	1	1	0	0	27	4	1	0	0	13		1		1		0		0	2
millecy01	1884	2	PRO	NL	3	2	6	5	2	0	0	104	36	8	0	11	12	0.25	2.08		11	0	0	150	1	24
millecy01	1884	3	PHI	NL	0	1	1	1	1	0	0	27	17	10	5	6	1	0.38	10		4	0	0	50	0	19
moffesa01	1884	1	CL2	NL	3	19	24	22	21	0	0	593	236	85	9	58	84	0.28	3.87		29	0	0	890	2	165
moriage01	1884	2	IN2	AA	0	2	2	2	2	0	0	41	16	8	0	7	4		5.27		1	1	0	68	0	13
morrie01	1884	1	BLU	UA	0	0	1	0	0	0	0	3	2	1	0	2	0		9		0		0		0	2
morried01	1884	1	CL5	AA	34	13	52	52	47	3	0	1289	335	104	3	51	302		2.18		0	13	0	1703	0	159
morrijo01	1884	1	BSN	NL	0	1	7	1	1	0	2	69	34	19	0	6	13	0.31	7.43		5	0	0	114	6	23
mortoch01	1884	1	TL1	AA	0	1	3	1	1	0	0	70	18	8	0	5	7		3.09		0	1	0	92	2	14
mortosp01	1884	1	PHI	NL	0	2	2	2	2	0	0	51	16	10	0	11	5	0.22	5.29		4	0	0	83	0	20
mountbi01	1884	1	CN2	AA	19	12	33	33	32	3	0	867	274	94	5	43	96		2.93		18	16	0	1193	0	148
mountfr01	1884	1	CL5	AA	23	17	42	41	40	5	1	1082	289	98	7	78	156		2.45		0	11	0	1473	1	163
mullato01	1884	1	TL1	AA	36	26	67	65	64	7	0	1701	481	159	5	89	325		2.52		0	32	0	2364	2	276
murphco01	1884	1	PHI	NL	0	3	3	3	3	0	0	78	37	19	1	6	10	0.31	6.58		5	0	0	122	0	34
murphjo01	1884	1	ALT	UA	5	6	14	10	10	0	0	335	141	48	3	9	46		3.87		0		0		4	90
murphjo01	1884	2	WIL	UA	0	6	7	6	5	0	0	144	52	16	3	2	27		3		0		0		1	36
neaglja01	1884	1	PT1	AA	11	26	38	38	37	2	0	978	354	135	6	70	85		3.73		0	18	0	1474	0	219
nelsobi01	1884	1	PT1	AA	1	2	3	3	3	0	0	78	26	13	1	8	6		4.5		5	4	0	115	0	21
nolanth01	1884	1	WIL	UA	1	4	5	5	5	0	0	120	44	13	1	7	52		2.93		0		0		0	28
oberbhe01	1884	1	BLU	UA	0	0	2	1	0	0	0	18	9	2	0	2	1		3		0		0		1	3
oberbhe01	1884	2	KCU	UA	0	5	6	4	3	0	0	89	47	19	0	3	6		5.76		0		0		2	35
obriebi01	1884	1	SPU	UA	1	0	2	0	0	0	0	30	8	2	0	3	7		1.8		0		0		2	5
odayha01	1884	1	TL1	AA	9	28	41	40	35	2	1	980	335	136	6	66	163		3.75		0	18	0	1412	1	241
oneilti01	1884	1	SL4	AA	11	4	17	14	14	0	0	423	125	42	3	51	36		2.68		0	4	0	625	3	95
orourji01	1884	1	BFN	NL	0	1	4	0	0	0	1	38	7	4	0	1	3	0.17	2.84		0	0	0	41	3	5
pfefffr01	1884	1	CHN	NL	0	0	1	0	0	0	0	3	3	1	0	1	0	0.33	9		1	0	0	10	1	2
poormto01	1884	1	TL1	AA	0	1	1	1	1	0	0	27	13	3	1	2	0		3		0	0	0	44	0	11
portehe01	1884	1	MLU	UA	3	3	6	6	6	1	0	153	32	17	1	9	71		3		0		0		0	25
powelab01	1884	1	WSU	UA	6	12	18	17	14	1	0	402	135	51	3	19	78		3.43		0		0		1	107
purcebl01	1884	1	PHI	NL	0	0	1	0	0	0	0	12	3	1	1	0	1	0.18	2.25		2	0	0	16	1	1
pylesh01	1884	1	PHI	NL	0	1	1	1	1	0	0	27	9	4	0	6	4	0.25	4		1	0	0	41	0	8
radboch01	1884	1	PRO	NL	59	12	75	73	73	11	1	2036	528	104	18	98	441	0.2	1.38		34	0	0	2672	2	216
radfopa01	1884	1	PRO	NL	0	2	2	2	1	0	0	39	27	11	0	3	2	0.4	7.62		1	0	0	70	0	19
recciph01	1884	1	LS2	AA	6	7	18	11	11	0	0	388	118	39	2	19	46		2.71		0	4	0	540	7	80
robinya01	1884	1	BLU	UA	3	3	11	3	3	0	0	225	96	29	1	18	61		3.48		0		0		8	61
roweda01	1884	1	SLU	UA	1	0	1	1	1	0	0	27	10	2	0	0	2		2		0		0		0	3
ryanjo02	1884	1	BLU	UA	3	2	6	6	5	0	0	153	61	19	1	16	33		3.35		0		0		0	42
seradbi01	1884	1	BFN	NL	16	20	37	37	34	2	0	924	373	146	21	111	150	0.28	4.27		42	0	0	1440	2	285
shallgu01	1884	1	CN2	AA	11	10	23	23	23	0	0	599	163	82	6	53	78		3.7		0	26	0	847	0	113
shawdu01	1884	1	DTN	NL	9	18	28	28	25	0	0	683	219	77	8	72	142	0.23	3.04		9	0	0	998	0	153
shawdu01	1884	2	BSU	UA	21	15	39	38	35	5	0	947	227	62	1	37	309		1.77		0		0		1	128
smith01	1884	1	BLU	UA	0	0	1	1	0	0	0	18	12	6	0	2	2		9		0		0		0	9
smithed01	1884	1	WS7	AA	0	2	3	2	2	0	0	66	27	12	0	5	4		4.91		0	1	0	104	1	23
smithed05	1884	1	BLU	UA	3	4	9	8	5	0	0	186	86	24	2	17	13		3.48		0		0		1	63
smithge01	1884	1	ALT	UA	0	0	1	0	0	0	0	3	3	1	0	0	1		9		0		0		1	2
smithph01	1884	1	PH4	AA	0	1	1	1	1	0	0	27	14	4	0	1	3		4		1	0	0	39	0	6
smithph01	1884	2	PT1	AA	0	1	1	1	1	0	0	24	11	8	0	2	4		9		1	1	0	39	0	10
striccu01	1884	1	PH4	AA	0	0	1	0	0	0	0	9	6	2	0	1	1		6		0	0	0	19	1	2
sullifl01	1884	1	PT1	AA	16	35	51	51	51	2	0	1323	496	206	15	96	189		4.2		0	20	0	1967	0	328
sullipa01	1884	1	KCU	UA	0	1	1	1	0	0	0	21	15	9	1	5	1		11.57		0		0		0	17
sullisl01	1884	1	SLU	UA	1	0	1	1	0	0	0	18	10	3	0	0	3		4.5		0		0		0	6
sullito01	1884	1	CL5	AA	2	2	4	4	4	0	0	93	42	14	2	3	12		4.06		3	0	0	135	0	22
swarted01	1884	1	PT1	AA	0	0	1	0	0	0	0	7	6	3	0	1	0		11.57		0	0	0	16	1	5
sweenbi01	1884	1	BLU	UA	40	21	62	60	58	4	0	1614	522	155	13	74	374		2.59		0		0		2	294
sweench01	1884	1	PRO	NL	17	8	27	24	22	4	1	663	153	38	4	29	145	0.18	1.55		10	0	0	846	3	70
sweench01	1884	2	SLU	UA	24	7	33	32	31	2	0	813	207	55	2	13	192		1.83		0		0		1	112
sylvelo01	1884	1	CNU	UA	0	1	6	1	1	0	1	98	32	13	0	6	7		3.58		0		0		5	27
taylobi01	1884	1	SLU	UA	25	4	33	29	29	2	4	789	222	49	2	40	154		1.68		0		0		4	97
taylobi01	1884	2	PH4	AA	18	12	30	30	30	1	0	780	232	73	3	44	130		2.53		0	12	0	1115	0	118
tennefr01	1884	2	BSU	UA	3	1	4	4	4	0	0	105	31	9	0	5	18		2.31		0		0		0	21
tennefr01	1884	3	WIL	UA	0	1	1	1	1	0	0	24	6	1	0	4	10		1.13		0		0		0	5
terryad01	1884	1	BR3	AA	19	35	56	55	54	2	0	1428	486	188	10	72	230		3.55		0	8	0	2046	1	308
thompar01	1884	1	WSU	UA	0	1	1	1	1	0	0	24	10	6	0	3	8		6.75		0		0		0	11
trumbed01	1884	1	WS7	AA	1	9	10	10	10	0	0	252	108	44	4	31	43		4.71		14	1	0	398	0	90
veachpe01	1884	1	KCU	UA	3	9	12	12	12	0	0	312	95	28	1	10	62		2.42		0		0		0	57
vintobi01	1884	1	PHI	NL	10	10	21	21	20	0	0	546	166	45	6	35	105	0.22	2.23		20	0	0	789	0	131
vossal01	1884	1	WSU	UA	5	14	27	20	18	0	0	559	206	74	2	32	112		3.57		0		0		7	136
vossal01	1884	2	KCU	UA	0	6	7	6	6	0	0	159	74	25	2	7	17		4.25		0		0		1	45
wardjo01	1884	1	NY1	NL	3	3	9	5	5	0	0	182	72	23	2	18	23	0.28	3.41		6	0	0	275	3	43
weavesa01	1884	1	PHU	UA	5	10	17	17	14	0	0	408	206	87	3	11	40		5.76		0		0		0	146
welchmi01	1884	1	NY1	NL	39	21	65	65	62	4	0	1672	528	155	12	146	345	0.23	2.5		39	0	0	2370	1	275
werdepe01	1884	1	SLU	UA	12	1	16	16	12	1	0	424	113	31	1	22	51		1.97		0		0		0	61
wheelha01	1884	2	KCU	UA	0	1	1	1	1	0	0	24	7	1	0	0	6		1.13		0		0		0	6
whitemi01	1884	1	SLU	UA	0	1	1	1	1	0	0	24	14	8	0	2	2		9		3		0		0	9
whitewi01	1884	1	CN2	AA	34	18	52	52	52	7	0	1368	479	168	16	74	118		3.32		0	35	0	1986	0	224
whitnji01	1884	1	BSN	NL	23	14	38	37	35	6	0	1008	272	78	12	27	270	0.2	2.09		18	0	0	1343	1	140
wiedmst01	1884	1	DTN	NL	4	21	26	26	24	0	0	638	257	88	9	57	96	0.27	3.72		7	0	0	1000	0	179
willine01	1884	1	CHN	NL	0	0	2	0	0	0	0	6	8	4	0	2	0	0.5	18		1	0	0	18	1	8
wisebi01	1884	1	WSU	UA	23	18	50	41	34	4	0	1093	383	123	5	60	268		3.04		0		0		8	219
wymanfr01	1884	1	KCU	UA	0	1	3	1	1	0	0	63	37	16	0	3	9		6.86		0		0		2	29
bakerno01	1885	1	LS2	AA	13	12	25	24	24	1	0	651	210	82	3	69	79		3.4		19	10	0	952	1	142
baldwki01	1885	1	CN2	AA	0	0	2	1	0	0	0	12	5	4	0	6	1		9		0	0	0	23	1	6
baldwla01	1885	1	DTN	NL	11	9	21	20	19	1	1	538	137	37	2	28	135	0.19	1.86		8	0	0	724	1	84
becanbu01	1885	1	NY4	AA	2	8	10	10	10	0	0	255	108	59	5	24	13		6.25		13	5	0	394	0	84
begleed01	1885	1	NY4	AA	4	9	15	14	10	0	0	345	131	63	5	48	44		4.93		17	8	0	527	1	102
boylehe01	1885	1	SL5	NL	16	24	42	39	39	1	0	1100	346	112	2	100	133	0.23	2.75		24	0	0	1547	3	207
brownjo01	1885	1	BL2	AA	0	4	4	4	4	0	0	114	52	24	0	4	9		5.68		2	0	0	174	0	33
brownto01	1885	1	PT1	AA	0	0	2	0	0	0	0	18	0	2	0	3	2		3		2	3	0	29	2	3
buffich01	1885	1	BSN	NL	22	27	51	50	49	6	0	1303	425	139	10	112	242	0.24	2.88		28	0	2	1838	1	238
burnsdi01	1885	1	SL5	NL	0	0	1	0	0	0	0	9	3	3	0	0	2	0.25	9		1	0	0	12	1	3
burnsoy01	1885	1	BL2	AA	7	4	15	11	10	1	3	317	112	42	2	21	30		3.58		23	13	0	455	4	76
carutbo01	1885	1	SL4	AA	40	13	53	53	53	6	0	1447	430	111	3	57	190		2.07		21	19	0	1948	0	196
caseyda01	1885	1	DTN	NL	4	8	12	12	12	1	0	312	105	38	1	35	79	0.25	3.29		2	0	0	445	0	61
clarkjo01	1885	1	CHN	NL	53	16	70	70	68	10	0	1869	497	128	21	97	308	0.2	1.85		14	0	0	2487	0	255
colemjo01	1885	1	PH4	AA	2	2	8	3	3	0	0	181	82	23	0	5	12		3.43		5	0	0	229	4	46
connojo02	1885	1	BFN	NL	0	1	1	1	1	0	0	27	14	4	0	2	0	0.37	4		1	0	0	39	0	9
connojo02	1885	2	LS2	AA	1	3	4	4	4	0	0	105	43	19	0	12	19		4.89		2	2	0	160	0	27
conwaji01	1885	1	PH4	AA	0	1	2	2	1	0	0	37	19	10	0	2	0		7.3		2	0	0	55	0	16
conwape01	1885	1	BFN	NL	10	17	27	27	26	1	0	630	256	109	10	44	94	0.28	4.67		21	0	0	937	0	173
corcola01	1885	1	CHN	NL	5	2	7	7	6	1	0	178	63	24	2	24	10	0.25	3.64		2	0	0	267	0	38
corcola01	1885	2	NY1	NL	2	1	3	3	2	0	0	75	24	8	1	11	10	0.24	2.88		2	0	0	109	0	12
coreyfr01	1885	1	PH4	AA	1	0	1	1	1	0	0	27	18	7	2	1	3		7		2	0	0	44	0	9
corkhpo01	1885	1	CN2	AA	1	4	8	1	0	0	1	111	36	15	2	10	12		3.65		3	1	0	159	7	25
crothdo01	1885	1	NY4	AA	7	11	18	18	18	1	0	462	192	87	4	49	40		5.08		12	2	0	706	0	135
cushmed01	1885	1	PH4	AA	3	7	10	10	10	0	0	261	101	34	1	17	37		3.52		13	3	0	396	0	77
cushmed01	1885	2	NY4	AA	8	14	22	22	22	0	0	573	158	59	2	33	133		2.78		21	3	0	790	0	105
dailyed01	1885	1	PHI	NL	26	23	50	50	49	4	0	1320	370	108	12	90	140	0.21	2.21		40	0	0	1797	0	212
dailyhu01	1885	1	SL5	NL	3	8	11	11	10	1	0	274	92	40	5	44	31	0.25	3.94		2	0	0	409	0	72
davisda01	1885	1	BSN	NL	5	6	11	11	10	1	0	283	110	45	2	28	30	0.28	4.29		9	0	0	421	0	58
edench01	1885	1	PT1	AA	1	2	4	1	0	0	0	47	22	9	0	3	5		5.17		3	0	0	73	3	13
emslibo01	1885	1	BL2	AA	3	10	13	13	11	0	0	321	131	51	0	30	27		4.29		12	5	0	474	0	87
emslibo01	1885	2	PH4	AA	0	4	4	4	3	0	0	86	37	20	1	6	9		6.28		3	0	0	145	0	30
ewingbu01	1885	1	NY1	NL	0	1	1	0	0	0	0	6	4	1	0	3	0	0.44	4.5		0	0	0	12	1	4
ferguch01	1885	1	PHI	NL	26	20	48	45	45	5	0	1215	345	100	5	81	197	0.21	2.22		15	0	3	1657	3	197
fishe01	1885	1	BFN	NL	0	1	1	1	1	0	0	27	10	5	0	2	4	0.25	5		2	0	0	41	0	9
foleyjo01	1885	1	PRO	NL	0	1	1	1	1	0	0	24	6	4	0	5	2	0.18	4.5		1	0	0	37	0	7
foremfr01	1885	1	BL2	AA	2	1	3	3	2	0	0	81	33	18	0	9	11		6		5	1	0	126	0	32
foutzda01	1885	1	SL4	AA	33	14	47	46	46	2	0	1223	351	119	8	92	147		2.63		22	18	0	1659	1	200
galvipu01	1885	1	BFN	NL	13	19	33	32	31	3	1	852	356	129	8	37	93	0.29	4.09		14	0	0	1255	1	204
galvipu01	1885	2	PT1	AA	3	7	11	11	9	0	0	265	97	36	2	7	27		3.67		7	0	0	372	0	64
gardngi01	1885	1	BL2	AA	0	1	1	1	1	0	0	27	16	10	2	6	3		10		1	1	0	49	0	13
getzich01	1885	1	DTN	NL	12	25	37	37	37	1	0	990	360	111	8	92	110	0.26	3.03		13	0	0	1455	0	222
hallsch01	1885	1	PRO	NL	0	1	1	1	1	0	0	27	18	11	3	6	0	0.4	11		1	0	0	50	0	16
hankifr01	1885	1	NY4	AA	0	0	1	0	0	0	0	6	2	1	1	1	0		4.5		0	0	0	5	0	1
harkijo01	1885	1	BR3	AA	14	20	34	34	33	1	0	879	303	122	7	56	141		3.75		39	7	0	1276	0	224
healyjo01	1885	1	SL5	NL	1	7	8	8	8	0	0	198	54	22	0	20	32	0.21	3		14	0	0	277	0	37
heckegu01	1885	1	LS2	AA	30	23	53	53	51	2	0	1440	454	116	6	54	209		2.18		15	18	0	1988	0	252
hendeha01	1885	1	BL2	AA	25	35	61	61	59	0	0	1618	539	191	7	117	263		3.19		55	19	0	2268	0	311
henryjo01	1885	1	BL2	AA	2	7	9	9	9	0	0	213	71	34	0	13	31		4.31		5	2	0	303	0	55
hoffojo01	1885	1	PT1	AA	0	3	3	3	3	0	0	75	28	10	1	9	21		3.6		5	0	0	111	0	16
hughebi01	1885	1	PH4	AA	0	2	2	2	2	0	0	50	18	9	0	10	4		4.86		3	2	0	79	0	17
keefeti01	1885	1	NY1	NL	32	13	46	46	45	7	0	1200	300	70	6	102	227	0.2	1.58		35	0	0	1577	0	154
keenaji01	1885	1	CN2	AA	0	0	1	0	0	0	0	24	7	1	0	1	0		1.13		0	0	0	31	1	2
kennete01	1885	1	CHN	NL	7	2	9	9	8	0	0	236	91	30	5	28	36	0.28	3.43		6	0	0	344	0	54
kimbesa01	1885	1	PRO	NL	0	1	1	1	1	0	0	24	15	10	1	5	4	0.4	11.25		1	0	0	42	0	13
kirbyjo01	1885	1	SL5	NL	5	8	14	14	14	0	0	388	118	51	0	44	46	0.24	3.55		10	0	1	534	0	66
knighlo01	1885	1	PH4	AA	0	0	1	0	0	0	0	15	4	1	0	2	1		1.8		1	0	0	21	1	1
knighlo01	1885	2	PRO	NL	0	0	1	0	0	0	0	12	4	3	1	4	1	0.23	6.75		1	0	0	21	1	4
knoufed01	1885	1	PH4	AA	7	6	14	13	12	0	0	318	103	43	0	44	43		3.65		15	9	0	505	2	76
lovetto01	1885	1	PH4	AA	7	8	16	16	15	1	0	416	130	57	3	38	56		3.7		18	5	0	594	0	96
lynchja01	1885	1	NY4	AA	23	21	44	43	43	1	0	1137	410	152	17	42	177		3.61		28	3	0	1606	1	243
maculji01	1885	1	BL2	AA	0	0	1	0	0	0	0	3	0	0	0	0	0		0		0	0	0	3	1	0
mathebo01	1885	1	PH4	AA	30	17	48	48	46	2	0	1267	394	114	3	57	286		2.43		20	20	0	1766	0	229
maysal01	1885	1	LS2	AA	6	11	17	17	17	0	0	450	129	46	3	43	61		2.76		15	8	0	639	0	102
mccaf01	1885	1	CN2	AA	1	0	1	1	1	0	0	27	13	6	1	2	2		6		2	2	0	42	0	9
mccorji01	1885	1	PRO	NL	1	3	4	4	4	0	0	111	34	10	1	20	8	0.23	2.43		7	0	0	165	0	26
mccorji01	1885	2	CHN	NL	20	4	24	24	24	3	0	645	187	58	8	40	88	0.22	2.43		3	0	0	873	0	103
mcginju01	1885	1	SL4	AA	6	6	13	13	12	3	0	336	98	42	1	19	41		3.38		11	6	0	461	0	65
mckeola01	1885	1	CN2	AA	20	13	33	33	32	2	0	870	273	92	5	50	117		2.86		8	13	0	1196	0	143
meegape01	1885	1	PT1	AA	7	8	18	16	14	1	0	438	146	55	1	38	58		3.39		7	10	0	640	2	90
meinkfr01	1885	1	DTN	NL	0	1	1	1	0	0	0	15	13	2	0	4	0	0.43	3.6		0	0	0	34	0	12
moriage01	1885	1	DTN	NL	0	0	1	0	0	0	0	6	3	2	0	1	1	0.3	9		1	0	0	11	1	3
morried01	1885	1	PT1	AA	39	24	63	63	63	7	0	1743	459	152	5	101	298		2.35		25	14	0	2321	0	245
mountbi01	1885	1	CN2	AA	10	7	17	17	17	1	0	461	149	54	5	52	50		3.16		15	7	0	666	0	89
mountbi01	1885	2	BL2	AA	2	4	6	6	6	1	0	159	72	32	1	13	15		5.43		2	4	0	231	0	47
mountfr01	1885	1	PT1	AA	1	4	5	5	5	0	0	138	56	22	1	24	7		4.3		3	2	0	201	0	31
nolanth01	1885	1	PHI	NL	1	5	7	7	6	0	0	162	55	25	1	24	20	0.25	4.17		5	0	0	239	0	43
odayha01	1885	1	PT1	AA	5	7	12	12	10	0	0	309	110	42	4	16	36		3.67		7	7	0	449	0	77
orrda01	1885	1	NY4	AA	0	0	3	0	0	0	0	30	11	8	2	5	1		7.2		1	0	0	53	3	13
palme01	1885	1	SL5	NL	0	4	4	4	4	0	0	102	46	13	2	20	9	0.31	3.44		6	0	0	168	0	33
pechige01	1885	1	CN2	AA	7	4	11	11	11	1	0	294	95	22	1	30	49		2.02		7	6	0	421	0	45
peoplji01	1885	1	CN2	AA	0	2	2	2	1	0	0	45	30	20	0	2	4		12		2	3	0	82	0	28
pfefffr01	1885	1	CHN	NL	2	1	5	2	2	0	2	95	26	9	1	8	13	0.22	2.56		3	0	0	125	3	15
portehe01	1885	1	BR3	AA	33	21	54	54	53	2	0	1445	427	149	11	107	197		2.78		26	16	0	2035	0	261
purcebl01	1885	1	PH4	AA	0	1	1	0	0	0	0	18	11	4	0	2	3		6		2	0	0	28	1	9
radboch01	1885	1	PRO	NL	28	21	49	49	49	2	0	1337	423	109	4	83	154	0.24	2.2		34	0	0	1841	0	209
radfopa01	1885	1	PRO	NL	0	2	3	2	2	0	0	55	34	16	1	8	3	0.37	7.85		1	0	0	98	0	27
ramseto01	1885	1	LS2	AA	3	6	9	9	9	0	0	237	44	17	1	28	83		1.94		8	1	0	322	0	38
recciph01	1885	1	LS2	AA	0	4	7	5	4	0	1	120	46	17	0	11	10		3.83		6	1	0	194	2	35
richada01	1885	1	NY1	NL	7	1	9	8	7	1	0	225	58	20	0	18	21	0.2	2.4		1	0	0	301	1	30
richaha01	1885	1	BFN	NL	0	0	1	0	0	0	0	12	5	1	0	3	1	0.29	2.25		2	0	0	20	1	2
rosemch01	1885	1	NY4	AA	0	1	1	1	0	0	0	3	3	3	0	2	0		27		0	0	0	11	0	5
seradbi01	1885	1	BFN	NL	7	21	30	29	27	0	0	724	299	110	5	80	90	0.29	4.1		38	0	0	1102	1	194
sewared01	1885	1	PRO	NL	0	0	1	0	0	0	0	18	2	0	0	0	1	0.1	0		2	0	0	20	1	0
shallgu01	1885	1	CN2	AA	6	4	13	12	7	0	0	274	95	33	1	33	15		3.25		14	13	0	404	1	59
shawdu01	1885	1	PRO	NL	23	26	49	49	47	6	0	1199	343	114	7	99	194	0.2	2.57		32	0	0	1740	0	209
smithed01	1885	1	PRO	NL	1	0	1	1	1	0	0	27	9	1	0	0	1	0.27	1		2	0	0	33	0	3
smithph01	1885	1	BR3	AA	0	1	1	1	1	0	0	24	12	11	0	6	2		12.38		3	1	0	47	0	18
smithph01	1885	2	PH4	AA	0	1	1	1	0	0	0	12	7	4	0	4	7		9		3	1	0	24	0	9
sommejo01	1885	1	BL2	AA	0	0	2	0	0	0	1	9	6	3	0	0	0		9		1	0	0	14	2	3
stellbi01	1885	1	PRO	NL	0	1	1	1	1	0	0	24	14	7	0	4	0	0.38	7.88		3	0	0	40	0	10
stemmbi01	1885	1	BSN	NL	1	1	2	2	2	1	0	33	7	0	0	11	8	0.19	0		2	0	0	47	0	7
sweench01	1885	1	SL5	NL	11	21	35	35	32	2	0	825	276	120	6	50	84	0.25	3.93		14	0	0	1155	0	175
taylobi01	1885	1	PH4	AA	1	5	6	6	6	0	0	157	68	19	0	9	11		3.27		6	1	0	208	0	35
terryad01	1885	1	BR3	AA	6	17	25	23	23	0	1	627	213	99	9	42	96		4.26		12	4	0	860	2	147
vintobi01	1885	1	PHI	NL	3	6	9	9	8	0	0	231	90	26	0	23	21	0.26	3.04		3	0	0	357	0	59
vintobi01	1885	2	PH4	AA	4	3	7	7	6	2	0	165	46	15	1	15	34		2.45		2	4	0	249	0	41
wardjo03	1885	1	PRO	NL	0	1	1	1	1	0	0	24	10	4	0	1	3	0.28	4.5		0	0	0	36	0	7
welchmi01	1885	1	NY1	NL	44	11	56	55	55	7	1	1476	372	91	4	131	258	0.2	1.66		39	0	1	1963	1	170
wetzesh01	1885	1	BL2	AA	0	2	2	2	1	0	0	51	27	16	0	9	6		8.47		9	3	2	93	0	26
whitewi01	1885	1	CN2	AA	18	15	34	34	33	2	0	880	295	115	9	64	80		3.53		25	27	0	1249	0	169
whitnji01	1885	1	BSN	NL	18	32	51	50	50	2	0	1324	503	146	14	37	200	0.27	2.98		32	0	0	1887	1	286
wiedmst01	1885	1	DTN	NL	14	24	38	38	37	3	0	990	343	115	7	63	149	0.25	3.14		15	0	0	1422	0	198
willine01	1885	1	CHN	NL	0	0	2	0	0	0	2	18	2	0	0	0	3	0.08	0		0	0	0	25	2	0
williwa01	1885	1	CHN	NL	0	0	1	1	0	0	0	6	2	3	0	5	0	0.4	13.5		1	0	0	10	0	5
wolfji01	1885	1	LS2	AA	0	0	1	0	0	0	0	3	1	1	0	0	1		9		0	0	0	5	0	2
woodge01	1885	1	DTN	NL	0	0	1	0	0	0	0	12	5	0	0	1	1	0.33	0		2	0	0	16	1	2
woodpe01	1885	1	BFN	NL	8	15	24	22	21	0	0	596	235	98	8	66	38	0.28	4.44		21	0	0	906	2	170
atkinal01	1886	1	PH4	AA	25	17	45	45	44	1	0	1190	414	174	11	101	154		3.95		23	22	0	1743	0	288
aydelja01	1886	1	PH4	AA	0	2	2	2	2	0	0	54	21	8	0	12	5		4		0	0	0	81	0	11
baldwla01	1886	1	DTN	NL	42	13	56	56	55	7	0	1461	371	121	11	100	323	0.2	2.24		22	0	0	1936	0	194
barrbo01	1886	1	WS8	NL	3	18	22	22	21	1	0	572	216	91	7	54	80	0.27	4.3		22	0	0	844	0	150
baueral01	1886	1	SL5	NL	0	4	4	4	3	0	0	86	31	19	1	27	13	0.26	5.97		9	0	0	143	0	27
bickhda01	1886	1	CN2	AA	1	0	1	1	1	0	0	27	13	3	0	3	6		3		0	0	0	40	0	11
bierblo01	1886	1	PH4	AA	0	0	2	0	0	0	0	32	8	5	0	5	1		4.22		0	0	0	50	2	9
bishobi01	1886	1	PT1	AA	0	1	2	2	2	0	0	51	17	6	0	11	4		3.18		0	1	0	89	0	14
boylehe01	1886	1	SL5	NL	9	15	25	24	23	2	0	630	183	41	5	46	101	0.22	1.76		12	0	1	877	1	106
brookha01	1886	1	NY4	AA	0	1	1	1	0	0	0	6	9	8	0	2	0		36		0	0	0	23	0	13
brownji01	1886	1	PH4	AA	0	1	1	1	1	0	0	25	9	3	0	3	4		3.24		0	0	0	37	0	5
brownto01	1886	1	PT1	AA	0	0	1	0	0	0	0	6	2	2	0	5	1		9		0	0	0	21	1	4
buffich01	1886	1	BSN	NL	7	10	18	17	16	0	0	453	203	77	4	39	47	0.3	4.59		9	0	0	699	1	129
cahiljo01	1886	1	SL5	NL	1	0	2	0	0	0	0	36	11	4	0	3	2	0.26	3		3	0	0	44	2	5
carutbo01	1886	1	SL4	AA	30	14	44	43	42	2	0	1162	323	100	3	86	166		2.32		12	7	0	1581	1	164
caseyda01	1886	1	PHI	NL	24	18	44	44	39	4	0	1107	326	99	8	104	193	0.22	2.41		25	0	0	1566	1	169
chambel01	1886	1	LS2	AA	0	3	4	4	4	0	0	94	39	23	0	17	18		6.61		0	0	0	153	0	43
clarked01	1886	1	PH4	AA	0	1	1	1	1	0	0	24	10	6	2	2	2		6.75		0	2	0	38	0	8
clarkjo01	1886	1	CHN	NL	36	17	55	55	50	3	0	1400	419	125	20	86	313	0.22	2.41		17	0	0	1914	0	248
colemjo01	1886	1	PH4	AA	1	1	3	1	1	0	0	62	18	6	1	5	2		2.61		0	1	0	84	2	9
conwadi01	1886	1	BL2	AA	2	7	9	9	8	0	0	230	106	58	6	43	64		6.81		0	3	0	386	0	91
conwape01	1886	1	KCN	NL	5	15	23	20	19	0	0	540	236	115	6	61	81	0.29	5.75		21	0	0	865	3	185
conwape01	1886	2	DTN	NL	6	5	11	11	11	0	0	273	93	34	1	25	35	0.25	3.36		6	0	0	389	0	55
corcola01	1886	2	WS8	NL	0	1	2	1	1	0	0	42	16	9	0	4	3	0.27	5.79		0	0	0	63	1	11
corkhpo01	1886	1	CN2	AA	0	0	1	0	0	0	0	2	1	1	0	0	1		13.5		0	0	0	8	1	1
craneed01	1886	1	WS8	NL	1	7	10	8	7	1	0	210	91	56	5	53	39	0.31	7.2		22	0	0	344	2	85
cushmed01	1886	1	NY4	AA	17	20	38	37	37	2	0	977	278	113	6	99	167		3.12		19	1	0	1365	1	180
dailyed01	1886	1	PHI	NL	16	9	27	23	22	1	0	654	211	74	7	59	95	0.24	3.06		16	0	0	932	4	123
dailyhu01	1886	1	WS8	NL	0	6	6	6	6	0	0	147	69	40	2	40	15	0.33	7.35		7	0	0	248	0	60
devliji02	1886	1	NY1	NL	0	0	1	0	0	0	1	6	3	4	0	4	2	0.25	18		1	0	0	16	1	5
elybo01	1886	1	LS2	AA	0	4	6	4	4	0	1	132	53	26	0	26	28		5.32		0	0	0	215	2	47
ferguch01	1886	1	PHI	NL	30	9	48	45	43	4	2	1187	317	87	11	69	212	0.21	1.98		11	0	0	1582	2	145
flynnjo02	1886	1	CHN	NL	23	6	32	29	28	2	1	771	207	64	9	63	146	0.21	2.24		28	0	0	1049	3	127
fogarji01	1886	1	PHI	NL	0	1	1	0	0	0	0	18	7	0	1	0	4	0.25	0		1	0	0	28	1	6
foutzda01	1886	1	SL4	AA	41	16	59	57	55	11	1	1512	418	118	5	144	283		2.11		26	10	0	2091	2	216
foxjo01	1886	1	WS8	NL	0	1	1	1	1	0	0	24	11	8	0	11	3	0.31	9		3	0	0	46	0	13
fulleed01	1886	1	WS8	NL	0	1	2	1	1	0	0	39	15	10	0	5	3	0.37	6.92		1	0	0	45	1	12
fulmech02	1886	1	BL2	AA	0	0	1	0	0	0	0	6	2	1	0	1	0		4.5		0	0	0	9	0	2
galvipu01	1886	1	PT1	AA	29	21	50	50	49	2	0	1304	457	129	3	75	72		2.67		13	7	0	1820	0	229
gessnch01	1886	1	PH4	AA	0	1	1	1	1	0	0	24	13	8	0	5	0		9		0	2	0	44	0	14
getzich01	1886	1	DTN	NL	30	11	43	43	42	1	0	1160	388	130	6	85	172	0.25	3.03		19	0	0	1640	0	203
gilmofr01	1886	1	WS8	NL	4	4	9	9	9	1	0	225	57	21	3	22	75	0.2	2.52		4	0	1	307	0	35
gravefr01	1886	1	SL5	NL	0	0	1	0	0	0	0	21	10	7	0	1	2	0.32	9		0	0	0	32	1	10
handiji01	1886	1	PT1	AA	7	7	14	14	12	1	0	342	82	42	1	33	83		3.32		0	12	0	465	0	65
harkijo01	1886	1	BR3	AA	15	16	34	33	33	0	0	877	286	117	6	114	118		3.6		26	5	0	1292	1	203
hartbi01	1886	1	PH4	AA	9	13	22	22	22	2	0	558	183	66	7	66	78		3.19		30	7	0	856	0	144
healyjo01	1886	1	SL5	NL	17	23	43	41	39	3	0	1061	315	113	5	118	213	0.23	2.88		40	0	1	1487	2	213
heckegu01	1886	1	LS2	AA	26	23	49	48	45	2	0	1262	390	134	6	118	133		2.87		17	10	0	1815	1	273
hendeha01	1886	1	BL2	AA	3	15	19	19	19	0	0	514	188	88	0	66	88		4.62		0	9	0	822	0	147
hendeha01	1886	2	BR3	AA	10	4	14	14	14	0	0	372	112	40	2	51	49		2.9		0	0	0	533	0	82
henryjo01	1886	1	WS8	NL	1	3	4	4	4	0	0	83	35	13	1	15	19	0.28	4.23		3	0	0	138	0	27
hoffojo01	1886	1	PT1	AA	3	6	9	9	9	0	0	243	88	39	1	40	25		4.33		0	2	0	379	0	66
housefr01	1886	1	BL2	AA	0	1	1	1	1	0	0	24	6	3	0	1	5		3.38		0	1	0	35	0	3
hudsona01	1886	1	SL4	AA	16	10	29	27	25	0	1	703	224	79	3	62	100		3.03		0	2	0	984	2	122
hyndmji01	1886	1	PH4	AA	0	1	1	1	0	0	0	6	5	6	1	5	1		27		0	1	0	17	0	10
irwinbi01	1886	1	CN2	AA	0	2	2	2	2	0	0	51	18	11	2	8	6		5.82		0	0	0	81	0	19
keefege01	1886	1	WS8	NL	0	3	4	4	4	0	0	94	28	18	0	15	5	0.23	5.17		5	0	0	135	0	22
keefeti01	1886	1	NY1	NL	42	20	64	64	62	2	0	1605	479	152	9	102	297	0.23	2.56		40	0	0	2173	0	250
keenaji01	1886	1	CN2	AA	0	1	2	0	0	0	0	24	8	3	0	3	2		3.38		0	0	0	34	2	5
kennete01	1886	1	PH4	AA	5	15	20	19	19	0	0	518	196	87	4	65	68		4.53		17	8	0	796	1	143
kennete01	1886	2	LS2	AA	0	4	4	4	4	0	0	96	53	19	1	16	14		5.34		0	1	0	168	0	43
kilroma01	1886	1	BL2	AA	29	34	68	68	66	5	0	1749	476	218	10	182	513		3.37		50	19	0	2469	0	350
kingsi01	1886	1	KCN	NL	1	3	5	5	5	0	0	117	43	21	1	9	23	0.24	4.85		8	0	0	188	0	35
kirbyjo01	1886	1	SL5	NL	11	26	41	41	38	1	0	975	329	119	9	134	129	0.25	3.3		43	0	1	1438	0	222
knoufed01	1886	1	BL2	AA	0	1	1	1	1	0	0	27	2	2	0	5	8		2		0	3	0	38	0	5
lilliji01	1886	1	KCN	NL	0	0	1	0	0	0	0	18	8	3	0	1	0	0.34	4.5		0	0	0	24	1	5
lynchja01	1886	1	NY4	AA	20	30	51	50	50	1	0	1298	485	190	10	116	193		3.95		39	12	0	1918	1	307
maculji01	1886	1	BL2	AA	0	0	1	0	0	0	0	6	4	2	0	0	1		9		0	0	0	10	1	3
madigto01	1886	1	WS8	NL	1	13	14	14	13	0	0	347	159	65	3	44	29	0.32	5.06		9	0	0	541	0	113
mathebo01	1886	1	PH4	AA	13	9	24	24	22	0	0	593	226	87	3	53	93		3.96		20	13	0	913	0	148
maysal01	1886	1	NY4	AA	11	28	41	41	39	1	0	1050	330	132	7	140	163		3.39		39	14	0	1528	0	231
mccarto01	1886	1	PHI	NL	0	0	1	0	0	0	0	3	0	0	0	1	1	0	0		0	0	0	4	1	0
mccorji01	1886	1	CHN	NL	31	11	42	42	38	2	0	1043	341	109	18	100	172	0.25	2.82		7	0	0	1449	0	165
mcginju01	1886	1	SL4	AA	5	5	10	10	10	1	0	263	107	37	2	27	30		3.8		0	7	0	406	0	75
mcginju01	1886	2	BL2	AA	11	13	26	25	24	0	0	628	235	81	6	48	70		3.48		0	14	0	902	1	141
mckeola01	1886	1	CN2	AA	8	8	19	19	16	0	0	468	174	88	6	54	46		5.08		16	3	0	687	0	118
mckeola01	1886	2	KCN	NL	0	2	3	3	3	0	0	63	44	25	0	8	3	0.41	10.71		2	0	0	115	0	32
millecy01	1886	1	PH4	AA	10	8	19	19	19	1	0	509	158	56	6	59	99		2.97		34	4	0	725	0	109
morried01	1886	1	PT1	AA	41	20	64	63	63	12	1	1666	455	151	5	118	326		2.45		28	7	0	2252	1	244
morrijo01	1886	1	BSN	NL	0	0	1	0	0	0	0	12	5	0	0	0	2	0.31	0		1	0	0	16	1	1
mountfr01	1886	1	PT1	AA	0	2	2	2	2	0	0	48	22	14	0	14	2		7.88		2	5	0	88	0	21
mullato01	1886	1	CN2	AA	33	27	63	56	55	1	0	1589	501	218	11	166	250		3.7		51	18	0	2258	7	315
murphjo02	1886	1	CN2	AA	2	3	5	5	5	0	0	138	50	25	0	21	11		4.89		7	1	0	217	0	34
murphjo02	1886	2	SL5	NL	0	4	4	4	3	0	0	99	45	30	3	16	11	0.31	8.18		10	0	0	157	0	41
murphjo02	1886	3	SL4	AA	1	0	1	1	1	0	0	21	5	3	0	3	3		3.86		1	0	0	31	0	4
nealejo01	1886	1	LS2	AA	0	1	1	1	0	0	0	21	11	6	0	7	0		7.71		0	1	0	36	0	12
oconnpa01	1886	1	BL2	AA	0	0	1	0	0	0	0	9	4	2	0	2	1		6		0	0	0	14	1	3
odayha01	1886	1	WS8	NL	2	2	6	6	6	0	0	147	41	9	1	17	47	0.21	1.65		3	0	0	204	0	17
parsoch01	1886	1	BSN	NL	0	2	2	2	2	0	0	48	20	7	0	4	5	0.3	3.94		0	0	0	69	0	13
pechige01	1886	1	CN2	AA	15	21	40	40	35	2	0	991	355	152	4	133	110		4.14		15	14	0	1482	0	230
pinknge01	1886	1	BR3	AA	0	0	1	0	0	0	0	6	2	1	0	0	0		4.5		0	0	0	5	1	1
portehe01	1886	1	BR3	AA	27	19	48	48	48	1	0	1272	439	161	8	120	163		3.42		20	5	0	1864	0	277
powelab01	1886	1	BL2	AA	2	5	7	7	7	0	0	180	66	34	2	26	15		5.1		0	1	0	277	0	51
powelab01	1886	2	CN2	AA	0	1	4	1	1	0	0	46	16	8	0	9	4		4.7		0	0	0	68	1	13
purcebl01	1886	1	BL2	AA	0	0	1	0	0	0	0	3	1	1	0	0	0		9		0	0	0	5	0	1
radboch01	1886	1	BSN	NL	27	31	58	58	57	3	0	1528	521	170	18	111	218	0.25	3		22	0	0	2162	0	300
ramseto01	1886	1	LS2	AA	38	27	67	67	66	3	0	1766	447	160	3	207	499		2.45		35	12	0	2477	0	297
reardje02	1886	1	SL5	NL	0	1	1	1	1	0	0	24	10	6	1	5	0	0.32	6.75		0	0	0	36	0	8
reardje02	1886	2	CN2	AA	0	1	1	1	0	0	0	6	5	4	0	4	0		18		0	0	0	14	0	4
recciph01	1886	1	LS2	AA	0	1	1	1	0	0	0	9	7	3	0	3	0		9		0	0	0	18	0	6
richada01	1886	1	NY1	NL	0	2	5	1	1	0	0	75	33	16	1	11	17	0.32	5.76		3	0	0	114	4	24
richaha01	1886	1	DTN	NL	3	0	4	0	0	0	0	36	11	6	1	10	5	0.2	4.5		2	0	0	63	4	8
richmle01	1886	1	CN2	AA	0	2	3	2	1	0	0	54	24	16	0	11	6		8		0	2	0	91	1	22
robinya01	1886	1	SL4	AA	0	1	1	1	1	0	0	27	10	3	0	7	1		3		0	0	0	42	0	11
rosemch01	1886	1	NY4	AA	0	0	1	0	0	0	0	21	6	4	0	0	0		5.14		0	0	0	25	1	6
ryanji01	1886	1	CHN	NL	0	0	5	0	0	0	1	70	19	12	2	13	15	0.25	4.63		1	0	0	87	5	13
scottmi01	1886	1	BL2	AA	0	0	1	0	0	0	0	9	2	1	0	2	0		3		0	1	0	19	1	2
seeryem01	1886	1	SL5	NL	0	0	2	0	0	0	0	21	8	6	1	3	2	0.32	7.71		0	0	0	28	2	7
shaffjo01	1886	1	NY4	AA	5	3	8	8	8	1	0	207	40	15	0	29	36		1.96		7	4	0	277	0	29
shawdu01	1886	1	WS8	NL	13	31	45	44	43	1	0	1157	384	143	12	91	177	0.25	3.34		18	0	0	1630	1	224
smithbi03	1886	1	DTN	NL	5	4	9	9	9	0	0	231	81	35	0	30	36	0.25	4.09		9	0	0	343	0	47
smithel01	1886	1	CN2	AA	4	4	9	9	8	0	0	218	57	30	1	44	40		3.72		0	3	0	362	0	62
smithph01	1886	1	DTN	NL	1	1	3	3	3	0	0	75	16	6	0	8	15	0.17	2.16		2	0	0	100	0	9
smithre01	1886	1	CN2	AA	0	1	1	1	1	0	0	27	8	4	0	10	1		4		0	0	0	0	1	4
smithre01	1886	2	PH4	AA	0	1	1	1	1	0	0	27	15	7	0	5	4		7		4	0	0	44	0	13
sommejo01	1886	1	BL2	AA	0	0	1	0	0	0	0	12	14	8	0	3	1		18		0	0	0	30	1	12
stemmbi01	1886	1	BSN	NL	22	18	41	41	41	0	0	1046	300	117	11	144	239	0.21	3.02		63	0	0	1520	0	218
stephcl01	1886	1	CN2	AA	1	0	1	1	1	0	0	24	9	5	0	5	6		5.63		3	1	0	39	0	8
stoveha01	1886	1	PH4	AA	0	0	1	0	0	0	0	1	2	1	0	0	0		27		0	0	0	3	0	2
straujo02	1886	1	LS2	AA	0	0	2	0	0	0	1	12	6	2	0	3	0		4.5		0	0	0	29	2	4
strikjo01	1886	1	PHI	NL	1	1	2	2	1	0	0	45	19	8	1	7	11	0.31	4.8		2	0	0	68	0	10
sullito01	1886	1	LS2	AA	2	7	9	9	8	0	0	225	94	33	6	33	27		3.96		11	2	0	343	0	70
sweench01	1886	1	SL5	NL	5	6	11	11	11	0	0	279	108	43	9	39	28	0.28	4.16		10	0	0	418	0	75
taylobi01	1886	1	BL2	AA	1	6	8	8	8	0	0	217	87	46	1	20	37		5.72		0	2	0	328	0	63
terryad01	1886	1	BR3	AA	18	16	34	34	32	5	0	865	263	99	1	115	162		3.09		32	16	0	1269	0	177
titcoca01	1886	1	PHI	NL	0	5	5	5	5	0	0	123	43	17	1	24	24	0.24	3.73		5	0	0	200	0	45
toolest01	1886	1	BR3	AA	6	6	13	12	11	0	0	312	100	51	0	64	48		4.41		0	8	0	479	1	92
twitcla01	1886	1	DTN	NL	0	2	4	4	2	0	0	75	35	18	1	12	6	0.34	6.48		2	0	0	113	0	22
weavesa01	1886	1	PH4	AA	0	2	2	2	1	0	0	33	30	18	0	2	2		14.73		0	1	0	74	0	29
welchmi01	1886	1	NY1	NL	33	22	59	59	56	1	0	1500	514	166	13	163	272	0.25	2.99		51	0	0	2151	0	279
whitebi02	1886	1	LS2	AA	0	0	1	0	0	0	0	3	2	1	0	2	1		9		0	0	0	7	1	2
whitewi01	1886	1	CN2	AA	1	2	3	3	3	0	0	78	28	12	1	10	6		4.15		2	6	0	116	0	23
whitnar01	1886	1	PT1	AA	0	0	1	0	0	0	0	18	7	2	0	3	2		3		0	0	0	26	1	4
whitnji01	1886	1	KCN	NL	12	32	46	44	42	3	0	1179	465	196	9	55	167	0.28	4.49		29	0	0	1691	2	292
wiedmst01	1886	1	KCN	NL	12	36	51	51	48	1	0	1283	549	214	11	112	168	0.3	4.5		35	0	0	1924	0	323
willine01	1886	1	CHN	NL	0	0	2	0	0	0	1	9	2	0	0	0	1	0.14	0		0	0	0	14	2	2
winkege01	1886	1	WS8	NL	0	1	1	1	0	0	0	18	12	7	0	5	4	0.4	10.5		5	0	0	35	0	11
wisebi01	1886	1	WS8	NL	0	1	1	1	0	0	0	9	6	3	0	2	0	0.4	9		0	0	0	17	0	6
wolfji01	1886	1	LS2	AA	0	0	1	0	0	0	0	9	7	5	0	0	0		15		0	0	0	20	1	8
yingljo01	1886	1	WS8	NL	0	0	1	0	0	0	0	9	7	4	0	1	1	0.41	12		0	0	0	18	1	6
zay01	1886	1	BL2	AA	0	1	1	1	0	0	0	6	4	2	0	4	2		9		0	0	0	16	0	4
allenmy01	1887	1	CL3	AA	1	0	2	0	0	0	0	29	9	1	0	3	1		0.93		0	1	0	41	1	4
atkinal01	1887	1	PH4	AA	6	8	15	15	11	0	0	374	156	82	2	54	34		5.92		0	6	0	594	2	121
baldwla01	1887	1	DTN	NL	13	10	24	24	24	1	0	633	225	90	8	61	60	0.26	3.84		7	5	0	901	0	136
baldwma01	1887	1	CHN	NL	18	17	40	39	35	1	1	1002	329	126	23	122	164	0.24	3.4		41	17	0	1465	2	218
beatied01	1887	1	DTN	NL	1	1	2	2	2	0	0	54	13	8	2	8	6	0.2	4		1	1	0	73	0	11
bierblo01	1887	1	PH4	AA	0	0	1	0	0	0	1	3	0	0	0	0	1		0		0	0	0	3	1	0
bishobi01	1887	1	PIT	NL	0	3	3	3	3	0	0	81	45	40	2	22	4	0.35	13.33		4	2	0	151	0	46
boylehe01	1887	1	IN3	NL	13	24	38	38	37	0	0	984	356	133	11	69	85	0.26	3.65		13	12	0	1424	0	204
buffich01	1887	1	PHI	NL	21	17	40	38	35	1	0	997	352	135	16	92	160	0.26	3.66		25	4	0	1431	1	224
burkebi01	1887	1	DTN	NL	0	1	2	2	1	0	0	45	26	10	0	5	3	0.31	6		1	2	0	73	0	14
burnsoy01	1887	1	BL2	AA	1	0	3	0	0	0	0	34	16	12	0	4	2		9.53		0	3	0	62	2	16
cahiljo01	1887	1	IN3	NL	0	2	6	1	1	0	0	66	40	35	2	19	5	0.43	14.32		4	2	0	114	5	38
carutbo01	1887	1	SL4	AA	29	9	39	39	39	2	0	1023	337	125	6	61	74		3.3		0	16	0	1442	0	185
caseybi01	1887	1	PH4	AA	0	0	1	0	0	0	0	3	4	2	0	1	0		18		0	0	0	7	1	3
caseyda01	1887	1	PHI	NL	28	13	45	45	43	4	0	1171	377	124	15	115	119	0.24	2.86		16	14	0	1660	0	199
chambel01	1887	1	LS2	AA	18	16	36	36	35	1	0	927	340	130	8	117	118		3.79		0	14	0	1374	0	226
chapmfr01	1887	1	PH4	AA	0	0	1	1	1	0	0	15	8	4	0	2	4		7.2		0	0	0	24	0	6
clarkjo01	1887	1	CHN	NL	38	21	60	59	56	2	0	1569	513	179	20	92	237	0.24	3.08		25	8	0	2183	1	283
conwadi01	1887	1	BSN	NL	9	15	26	26	25	0	0	667	249	115	10	86	45	0.27	4.66		17	7	0	996	0	161
conwape01	1887	1	DTN	NL	8	9	17	17	16	0	0	438	132	47	3	47	40	0.23	2.9		11	5	0	613	0	95
corcola01	1887	1	IN3	NL	0	2	2	2	1	0	0	45	23	21	3	19	4	0.33	12.6		0	2	0	89	0	31
corkhpo01	1887	1	CN2	AA	1	0	5	0	0	0	0	44	22	9	0	5	3		5.52		0	0	0	73	4	15
crowebi01	1887	1	CL3	AA	14	31	45	45	45	1	0	1168	541	211	9	138	72		4.88		0	20	0	1812	0	350
cunnibe01	1887	1	BR3	AA	0	2	3	3	3	0	0	69	26	13	0	13	8		5.09		0	4	0	116	0	22
cushmed01	1887	1	NY4	AA	10	15	26	26	25	0	0	660	310	146	9	83	64		5.97		0	9	0	1047	0	232
dailyed01	1887	1	PHI	NL	0	4	6	5	4	0	0	124	52	33	2	25	7	0.28	7.19		4	0	0	205	1	52
dailyed01	1887	2	WS8	NL	0	1	1	1	1	0	0	21	5	6	0	6	3	0.2	7.71		1	0	0	30	0	6
dailyhu01	1887	1	CL3	AA	4	12	16	16	16	0	0	419	181	57	1	44	30		3.67		0	3	0	629	0	108
devliji02	1887	1	PHI	NL	0	2	2	2	2	0	0	54	20	12	0	10	6	0.26	6		1	3	0	88	0	19
dunlafr01	1887	1	DTN	NL	0	0	1	0	0	0	0	6	4	1	0	0	1	0.5	4.5		0	0	0	8	1	2
faganbi01	1887	1	NY4	AA	1	4	6	6	6	0	0	135	55	20	1	24	12		4		0	2	0	206	0	34
fast01	1887	1	IN3	NL	0	1	4	2	1	0	1	47	25	18	1	8	0	0.34	10.34		4	2	0	82	1	22
ferguch01	1887	1	PHI	NL	22	10	37	33	31	2	1	892	297	99	13	47	125	0.25	3		5	11	0	1227	4	154
fieldjo01	1887	1	PIT	NL	0	0	1	0	0	0	0	3	0	0	0	2	0	0	0		1	0	0	7	0	3
fogarji01	1887	1	PHI	NL	0	0	1	0	0	0	0	9	3	3	0	1	0	0.2	9		1	0	0	16	1	4
foutzda01	1887	1	SL4	AA	25	12	40	38	36	1	0	1018	369	146	7	90	94		3.87		0	10	0	1533	2	244
galvipu01	1887	1	PIT	NL	28	21	49	48	47	2	0	1322	490	161	12	67	76	0.26	3.29		7	11	0	1897	2	259
gardnbi01	1887	1	BL2	AA	0	1	3	2	1	0	0	39	23	16	0	10	3		11.08		0	1	0	65	1	20
geissem01	1887	1	CHN	NL	0	1	1	1	1	0	0	27	17	8	0	3	4	0.39	8		0	0	0	46	0	11
georgbi01	1887	1	NY1	NL	3	9	13	13	11	0	0	324	126	63	1	89	49	0.29	5.25		22	14	0	535	0	112
getzich01	1887	1	DTN	NL	29	13	43	42	41	2	0	1100	373	152	24	106	135	0.25	3.73		18	2	0	1578	1	217
gilksbo01	1887	1	CL3	AA	7	5	13	13	12	1	0	324	104	37	1	42	28		3.08		0	9	0	475	0	66
gilmofr01	1887	1	WS8	NL	7	20	28	27	27	1	0	704	247	101	7	92	114	0.26	3.87		14	13	0	1047	1	172
glassja01	1887	1	IN3	NL	0	0	1	0	0	0	0	3	0	0	0	0	1	0	0		0	0	0	3	1	0
grubehe01	1887	1	DTN	NL	4	3	7	7	7	0	0	187	63	19	3	21	12	0.26	2.74		1	0	0	261	0	29
harkijo01	1887	1	BR3	AA	10	14	24	24	22	0	0	597	262	133	6	77	36		6.02		0	5	0	931	0	184
hartbi01	1887	1	PH4	AA	1	2	3	3	3	0	0	78	28	13	1	17	4		4.5		0	1	0	121	0	22
healyjo01	1887	1	IN3	NL	12	29	41	41	40	3	0	1023	415	196	24	108	75	0.29	5.17		39	15	0	1535	0	292
heckegu01	1887	1	LS2	AA	18	12	34	32	32	2	1	856	325	132	9	50	58		4.16		0	10	0	1256	2	214
hendeha01	1887	1	BR3	AA	5	8	13	12	12	0	0	335	127	49	3	63	28		3.95		0	5	0	520	1	85
hudsona01	1887	1	SL4	AA	4	4	9	9	7	0	0	201	91	37	2	20	15		4.97		0	4	0	322	0	57
jonesch01	1887	2	NY4	AA	0	0	2	0	0	0	0	9	2	1	0	4	0		3		0	0	0	11	1	2
keatibo01	1887	1	BL2	AA	0	1	1	1	1	0	0	27	16	11	0	6	0		11		0	0	0	49	0	16
keefege01	1887	1	WS8	NL	0	1	1	1	1	0	0	24	16	8	1	4	0	0.36	9		2	2	0	50	0	20
keefeti01	1887	1	NY1	NL	35	19	56	56	54	2	0	1430	428	165	11	108	189	0.23	3.12		37	11	0	1981	1	260
kellyki01	1887	1	BSN	NL	1	0	3	0	0	0	0	39	17	5	1	14	0	0.29	3.46		5	0	0	71	3	16
kilroma01	1887	1	BL2	AA	46	19	69	69	66	6	0	1768	585	201	9	157	217		3.07		0	20	0	2492	1	326
kingsi01	1887	1	SL4	AA	32	12	46	44	43	2	1	1170	401	164	4	109	128		3.78		0	17	0	1666	2	231
kirbyjo01	1887	1	IN3	NL	1	6	8	8	5	0	0	186	70	42	3	43	7	0.27	6.1		4	2	0	302	0	64
kirbyjo01	1887	2	CL3	AA	0	5	5	5	5	0	0	123	62	41	1	28	6		9		0	2	0	213	0	53
knoufed01	1887	1	BL2	AA	2	6	9	9	6	0	0	189	79	53	0	41	27		7.57		0	13	0	322	0	79
knoufed01	1887	2	SL4	AA	4	2	6	6	6	1	0	150	40	25	0	36	18		4.5		0	3	0	217	0	34
leitndo01	1887	1	IN3	NL	2	6	8	8	8	0	0	195	69	41	6	41	27	0.25	5.68		12	0	1	307	0	66
lynchja01	1887	1	NY4	AA	7	14	21	21	21	0	0	561	245	106	8	36	45		5.1		0	4	0	843	0	158
maddeki01	1887	1	BSN	NL	21	14	37	37	36	3	0	963	317	135	20	122	81	0.25	3.79		10	20	0	1404	0	203
mathebo01	1887	1	PH4	AA	3	4	7	7	7	0	0	174	75	43	4	25	9		6.67		0	3	0	280	0	64
mattimi01	1887	1	NY1	NL	3	3	7	7	6	1	0	172	47	15	2	28	12	0.21	2.35		3	4	0	248	0	39
maulal01	1887	1	PHI	NL	4	2	7	5	4	0	0	151	72	31	2	15	18	0.32	5.54		4	2	0	238	2	50
maysal01	1887	1	NY4	AA	17	34	52	52	50	0	0	1324	551	232	11	136	124		4.73		0	20	0	2002	1	359
mccorji01	1887	1	PIT	NL	13	23	36	36	36	0	0	967	377	154	12	84	77	0.28	4.3		16	12	0	1417	0	217
mcgeaja01	1887	1	IN3	NL	0	1	1	0	0	0	0	19	13	8	2	4	3	0.35	11.37		1	0	0	41	1	17
mcginju01	1887	1	CN2	AA	3	5	8	8	8	0	0	208	85	42	3	43	18		5.45		0	8	0	338	0	66
mcmulge01	1887	1	NY4	AA	2	1	3	3	2	0	0	63	25	18	2	19	2		7.71		0	0	0	112	1	25
moffesa01	1887	1	IN3	NL	1	5	6	6	6	0	0	150	47	21	1	23	3	0.24	3.78		3	4	0	221	0	45
morried01	1887	1	PIT	NL	14	22	38	38	37	1	0	953	375	152	13	71	91	0.28	4.31		13	8	0	1392	0	225
morriha01	1887	1	IN3	NL	3	4	7	7	5	0	0	171	79	48	2	27	13	0.3	7.58		7	1	0	285	0	73
morrimi01	1887	1	CL3	AA	12	25	40	40	35	0	0	950	385	173	13	205	158		4.92		0	22	0	1536	1	341
mullato01	1887	1	CN2	AA	31	17	48	48	47	6	0	1249	414	150	11	121	97		3.24		0	32	0	1763	1	234
murphjo02	1887	1	SL4	AA	1	0	1	1	1	0	0	27	13	5	0	4	5		5		0	1	0	46	0	8
nealejo01	1887	1	LS2	AA	1	4	5	4	4	0	0	124	60	32	4	15	11		6.97		0	2	0	201	1	50
obrieda01	1887	1	NY4	AA	0	0	1	0	0	0	0	3	1	0	0	1	0		0		0	0	0	4	0	0
obrieto01	1887	1	NY4	AA	0	0	1	0	0	0	0	11	4	3	0	5	0		7.36		0	0	0	24	0	5
odayha01	1887	1	WS8	NL	8	20	30	30	29	0	0	764	255	118	15	109	86	0.25	4.17		31	9	0	1122	0	197
parsoch01	1887	1	NY4	AA	1	1	4	4	4	0	0	102	51	17	0	6	5		4.5		0	1	0	167	0	36
pechige01	1887	1	CL3	AA	1	9	10	10	10	0	0	258	118	68	8	44	24		7.12		0	3	0	436	0	124
pettibo01	1887	1	CHN	NL	0	0	1	0	0	0	1	3	3	0	0	2	0	0.37	0		3	0	0	10	1	8
poormto01	1887	1	PH4	AA	0	0	1	0	0	0	0	2	5	3	1	1	1		40.5		0	0	0	7	0	4
portehe01	1887	1	BR3	AA	15	24	40	40	38	1	0	1019	416	159	7	96	74		4.21		0	7	0	1504	0	264
purcebl01	1887	1	BL2	AA	0	0	1	0	0	0	0	12	8	7	0	4	2		15.75		0	1	0	26	1	8
pylesh01	1887	1	CHN	NL	1	3	4	4	3	0	0	80	32	14	1	21	5	0.29	4.73		4	2	0	133	0	27
radboch01	1887	1	BSN	NL	24	23	50	50	48	1	0	1275	505	215	20	133	87	0.28	4.55		20	14	0	1915	0	305
radfopa01	1887	1	NY4	AA	0	0	2	0	0	0	0	15	15	10	1	3	4		18		0	0	0	22	1	16
ramseto01	1887	1	LS2	AA	37	27	65	64	61	0	0	1683	544	214	9	167	355		3.43		0	16	0	2430	1	358
recciph01	1887	2	CL3	AA	0	0	1	0	0	0	0	21	8	6	0	5	0		7.71		0	0	0	30	1	7
richada01	1887	1	NY1	NL	0	0	1	0	0	0	0	0	0	0	0	1	0	0			0	0	0	1	1	0
roachjo01	1887	1	NY1	NL	0	1	1	1	1	0	0	24	18	10	0	4	3	0.41	11.25		1	1	0	48	0	17
robinya01	1887	1	SL4	AA	0	0	1	0	0	0	1	9	3	1	0	3	0		3		0	1	0	13	1	2
rosemch01	1887	2	NY4	AA	0	0	2	0	0	0	0	24	11	7	0	5	1		7.88		0	2	0	34	1	14
ryancy01	1887	1	NY4	AA	0	1	2	1	0	0	0	7	5	6	1	6	0		23.14		0	0	0	17	1	9
ryanji01	1887	1	CHN	NL	2	1	8	3	2	0	0	135	53	21	3	17	14	0.3	4.2		3	6	0	197	4	36
scheifr01	1887	1	CL3	AA	0	1	1	1	1	0	0	27	17	12	1	4	3		12		2	1	0	52	0	18
seradbi01	1887	1	CN2	AA	10	11	22	21	20	2	1	562	201	85	7	80	34		4.08		0	8	0	843	1	139
sewared01	1887	1	PH4	AA	25	25	55	52	52	3	0	1412	445	216	7	140	155		4.13		0	24	0	1990	2	293
shaffjo01	1887	1	NY4	AA	2	11	13	13	13	0	0	336	148	77	3	53	22		6.19		13	11	0	542	0	119
shawdu01	1887	1	WS8	NL	7	13	21	20	20	0	0	544	263	130	8	46	47	0.32	6.45		3	3	0	852	1	177
sheami01	1887	1	CN2	AA	1	1	2	2	2	0	0	50	26	13	0	10	0		7.02		0	0	0	88	0	25
shrevle01	1887	1	BL2	AA	3	1	5	5	4	1	0	114	33	16	0	19	13		3.79		0	1	0	165	0	26
shrevle01	1887	2	IN3	NL	5	9	14	14	14	1	0	366	141	64	5	65	22	0.27	4.72		6	4	0	576	0	100
smithel01	1887	1	CN2	AA	34	17	52	52	49	3	0	1342	400	146	5	126	176		2.94		0	9	0	1872	0	224
smithph01	1887	1	BL2	AA	25	30	58	55	54	1	0	1474	526	207	7	176	206		3.79		0	14	0	2204	3	369
sommejo01	1887	1	BL2	AA	0	0	1	0	0	0	0	3	2	1	0	1	0		9		0	0	0	7	1	1
sowdejo01	1887	1	IN3	NL	0	0	1	0	0	0	0	9	11	7	0	5	0	0.5	21		4	0	0	27	1	13
spragch01	1887	1	CHN	NL	1	0	3	3	2	0	0	66	24	12	1	13	9	0.27	4.91		1	4	0	104	0	16
stemmbi01	1887	1	BSN	NL	6	8	15	14	14	0	1	358	138	69	4	41	41	0.27	5.2		12	2	0	547	1	107
striccu01	1887	1	CL3	AA	0	0	3	0	0	0	1	17	5	2	0	7	2		3.18		0	0	0	28	3	5
sullima01	1887	1	CHN	NL	0	0	1	0	0	0	0	7	6	2	0	1	1	0.5	7.71		0	0	0	13	0	2
swababi01	1887	1	NY1	NL	0	2	2	2	2	0	0	48	27	9	1	6	6	0.34	5.06		0	1	0	85	0	23
sweench01	1887	1	CL3	AA	0	3	3	3	3	0	0	72	42	22	0	13	8		8.25		7	0	0	126	0	36
taylobi01	1887	1	PH4	AA	1	0	1	1	1	0	0	27	10	3	1	7	0		3		0	0	0	42	0	5
tebeage01	1887	1	CN2	AA	0	1	1	1	1	0	0	24	21	12	0	3	1		13.5		0	1	0	47	0	16
terryad01	1887	1	BR3	AA	16	16	40	35	35	1	3	954	331	142	10	99	138		4.02		0	9	0	1373	5	230
tiernmi01	1887	1	NY1	NL	1	2	5	0	0	0	1	59	33	19	2	7	3	0.39	8.69		1	1	0	91	4	25
titcoca01	1887	1	PH4	AA	1	2	3	3	3	0	0	72	31	18	1	19	16		6.75		0	0	0	123	0	30
titcoca01	1887	2	NY1	NL	4	3	9	9	9	0	0	216	68	31	3	37	34	0.23	3.88		3	1	1	330	0	50
toolest01	1887	1	BR3	AA	14	10	24	24	22	1	0	582	186	93	1	106	48		4.31		0	12	0	850	0	133
twitcla01	1887	1	DTN	NL	11	1	15	12	11	0	1	337	120	54	3	36	24	0.26	4.33		6	10	0	494	3	74
vanhage01	1887	1	CHN	NL	11	7	20	18	18	1	1	483	177	69	7	66	76	0.27	3.86		9	16	0	722	1	113
veachpe01	1887	1	LS2	AA	0	1	1	1	1	0	0	27	5	4	1	8	2		4		0	0	0	37	0	6
watsomo01	1887	1	CN2	AA	0	1	2	2	1	0	0	42	22	9	0	6	1		5.79		0	0	0	73	0	18
welchmi01	1887	1	NY1	NL	22	15	41	40	39	2	0	1038	339	129	7	91	115	0.25	3.36		16	5	0	1438	0	191
weyhigu01	1887	1	PH4	AA	26	28	55	55	53	2	0	1399	465	221	12	167	193		4.27		0	37	0	2042	0	342
whitnji01	1887	1	WS8	NL	24	21	47	47	46	3	0	1214	430	145	16	42	146	0.25	3.22		14	16	0	1718	0	253
widnewi01	1887	1	CN2	AA	1	0	1	1	1	0	0	27	11	5	2	2	0		5		1	1	0	43	0	8
wiedmst01	1887	1	DTN	NL	13	7	21	21	20	0	0	549	221	109	9	60	56	0.29	5.36		6	9	0	815	0	132
wiedmst01	1887	2	NY4	AA	4	8	12	12	11	1	0	291	122	50	3	25	37		4.64		0	1	0	444	0	84
wiedmst01	1887	3	NY1	NL	0	1	1	1	1	0	0	24	10	1	0	2	4	0.28	1.13		1	0	0	37	0	6
willine01	1887	1	CHN	NL	0	0	1	0	0	0	0	6	2	2	0	1	0	0.22	9		0	0	0	10	1	2
allenmy01	1888	1	KC2	AA	0	2	2	2	2	0	0	54	17	5	0	1	2		2.5		0	0	0	73	0	7
bakelje01	1888	1	CL3	AA	25	33	61	61	60	4	0	1598	518	176	14	128	212		2.97		0	0	0	2195	0	321
baldwla01	1888	1	DTN	NL	3	3	6	6	5	0	0	159	76	32	5	15	26	0.32	5.43		5	1	0	252	1	50
baldwma01	1888	1	CHN	NL	13	15	30	30	27	2	0	753	241	77	13	99	157	0.24	2.76		18	13	0	1079	0	137
beatied01	1888	1	DTN	NL	5	7	12	12	12	1	0	321	111	34	6	16	44	0.25	2.86		9	2	1	461	0	60
bierblo01	1888	1	PH4	AA	0	0	1	0	0	0	0	9	5	0	0	0	3		0		0	0	0	14	1	1
blairbi01	1888	1	PH4	AA	1	3	4	4	3	0	0	93	29	9	0	8	16		2.61		0	0	0	0	0	21
borchge01	1888	1	CHN	NL	4	4	10	10	7	1	0	201	67	26	2	29	26	0.25	3.49		10	6	0	302	0	45
boylehe01	1888	1	IN3	NL	15	22	37	37	36	3	0	969	315	117	11	58	98	0.24	3.26		22	10	0	1354	0	179
brynato01	1888	1	CHN	NL	2	1	3	3	2	0	0	75	29	18	2	7	11	0.27	6.48		3	2	0	116	1	26
buffich01	1888	1	PHI	NL	28	17	46	46	43	6	0	1201	324	85	6	59	199	0.21	1.91		15	4	0	1586	0	139
burdibi01	1888	1	IN3	NL	10	10	20	20	20	0	0	528	168	55	12	43	55	0.24	2.81		15	6	0	742	0	88
burnsoy01	1888	1	BL2	AA	0	1	5	0	0	0	0	38	12	6	0	3	2		4.26		0	0	0	0	4	8
carutbo01	1888	1	BR3	AA	29	15	44	43	42	4	0	1175	337	104	4	53	140		2.39		0	0	0	1575	1	176
caseyda01	1888	1	PHI	NL	14	18	33	33	31	2	0	857	298	100	6	48	108	0.25	3.15		9	5	0	1205	0	156
chambel01	1888	1	LS2	AA	14	9	24	24	21	1	0	588	177	55	2	59	119		2.53		0	0	0	816	0	123
chambel01	1888	2	SL4	AA	11	2	14	14	13	1	0	336	61	20	1	27	57		1.61		0	0	0	0	0	34
clarkda01	1888	1	CHN	NL	1	0	2	2	1	0	0	48	23	9	2	6	6	0.31	5.06		3	2	0	81	0	17
clarkjo01	1888	1	BSN	NL	33	20	54	54	53	3	0	1450	448	148	17	119	223	0.23	2.76		33	10	0	2029	0	239
conwadi01	1888	1	BSN	NL	4	2	6	6	6	0	0	159	49	14	2	8	12	0.24	2.38		5	4	0	216	0	31
conwape01	1888	1	DTN	NL	30	14	45	45	43	4	0	1173	315	98	11	57	176	0.2	2.26		8	13	0	1586	0	170
corkhpo01	1888	1	CN2	AA	0	0	2	0	0	0	1	15	8	6	1	0	1		10.8		0	0	0	0	2	6
craneed01	1888	1	NY1	NL	5	6	12	11	11	2	1	278	70	25	3	40	58	0.19	2.43		10	2	0	404	1	51
crowebi01	1888	1	CL3	AA	5	13	18	18	16	0	0	452	212	97	8	61	61		5.79		0	0	0	1035	0	148
crowebi01	1888	2	LS2	AA	0	1	1	1	1	0	0	27	12	6	1	6	5		6		0	0	0	44	0	14
cunnibe01	1888	1	BL2	AA	22	29	51	51	50	0	0	1360	412	171	8	157	186		3.39		0	0	0	1897	0	275
dailyed01	1888	1	WS8	NL	2	7	9	8	8	0	0	221	88	40	7	19	20	0.27	4.89		10	3	0	338	1	69
dennyje01	1888	1	IN3	NL	0	0	1	0	0	0	0	12	5	4	1	4	1	0.27	9		3	0	0	22	1	5
devliji02	1888	1	SL4	AA	6	5	11	11	10	0	0	271	82	32	3	20	45		3.19		0	0	0	0	0	54
dwyerfr01	1888	1	CHN	NL	4	1	5	5	5	1	0	126	32	5	1	9	17	0.19	1.07		2	0	0	171	0	20
ehretre01	1888	1	KC2	AA	3	2	7	6	5	0	0	156	58	23	1	22	12		3.98		0	0	0	241	1	30
ewingbu01	1888	1	NY1	NL	0	0	2	0	0	0	0	21	8	2	1	4	6	0.17	2.57		2	1	0	51	2	9
ewingjo01	1888	1	LS2	AA	8	13	21	21	21	2	0	573	175	60	3	34	87		2.83		0	0	0	976	0	105
faganbi01	1888	1	KC2	AA	5	11	17	17	15	0	0	427	179	90	4	75	49		5.69		0	0	0	696	0	148
foutzda01	1888	1	BR3	AA	12	7	23	19	19	0	0	528	146	49	3	35	73		2.51		0	0	0	660	4	85
freemju01	1888	1	SL4	AA	0	1	1	1	0	0	0	19	7	3	0	4	1		4.26		0	0	0	0	0	5
galvipu01	1888	1	PIT	NL	23	25	50	50	49	6	0	1312	446	128	9	53	107	0.25	2.63		11	8	0	1809	0	190
gamblbo01	1888	1	PH4	AA	0	1	1	1	1	0	0	27	10	8	0	3	2		8		0	0	0	0	0	10
georgbi01	1888	1	NY1	NL	2	1	4	3	3	1	0	101	18	5	0	11	26	0.14	1.34		3	1	0	133	1	9
getzich01	1888	1	DTN	NL	19	25	46	46	45	2	0	1212	411	137	13	54	202	0.25	3.05		23	8	0	1697	0	225
gilksbo01	1888	1	CL3	AA	0	2	4	2	2	0	1	63	26	19	1	8	3		8.14		0	0	0	98	2	23
gilmofr01	1888	1	WS8	NL	1	9	12	11	10	0	0	287	131	70	4	29	23	0.32	6.59		6	7	0	442	1	101
glassja01	1888	1	IN3	NL	0	0	1	0	0	0	0	1	1	2	0	2	1	1	54		0	1	0		0	3
gleaski01	1888	1	PHI	NL	7	16	24	23	23	0	0	599	199	63	11	53	89	0.25	2.84		11	12	0	855	1	112
greenjo01	1888	1	WS8	NL	0	1	1	1	1	0	0	27	17	11	2	4	2	0.4	11		4	0	0	46	0	13
grubehe01	1888	1	DTN	NL	11	14	27	25	25	3	0	720	196	61	8	41	71	0.21	2.29		15	4	0	966	2	121
gumbead01	1888	1	CHN	NL	3	3	6	6	5	0	0	146	44	17	0	10	16	0.23	3.14		0	5	0	203	0	24
haddoge01	1888	1	WS8	NL	0	2	2	2	2	0	0	48	9	4	0	2	3	0.14	2.25		1	1	0	64	0	8
hafnefr01	1888	1	KC2	AA	0	2	2	2	2	0	0	54	24	14	2	16	5		7		6	1	0	93	0	23
harkijo01	1888	1	BL2	AA	0	1	1	1	1	0	0	24	12	6	0	3	2		6.75		0	0	0	0	0	12
healyjo01	1888	1	IN3	NL	12	24	37	37	36	1	0	964	347	139	13	87	124	0.26	3.89		19	15	1	1401	0	199
heckegu01	1888	1	LS2	AA	8	17	26	25	25	0	0	670	251	84	5	43	63		3.39		0	0	0	951	1	154
hendeha01	1888	1	PIT	NL	1	3	5	5	4	0	0	106	43	21	0	20	9	0.28	5.35		4	2	0	171	0	31
hoffmfr01	1888	1	KC2	AA	3	9	12	12	12	0	0	312	102	32	3	42	38		2.77		0	0	0	0	0	71
hudsona01	1888	1	SL4	AA	25	10	39	37	36	5	0	999	283	94	8	59	130		2.54		0	0	0	1334	2	155
hughemi01	1888	1	BR3	AA	25	13	40	40	40	2	0	1089	281	86	5	98	159		2.13		0	0	0	1465	0	163
keased01	1888	1	CL3	AA	3	3	6	6	6	0	0	153	53	13	1	12	18		2.29		0	0	0	0	0	28
keefege01	1888	1	WS8	NL	6	7	13	13	13	1	0	342	87	36	2	43	52	0.2	2.84		7	4	0	469	0	55
keefeti01	1888	1	NY1	NL	35	12	51	51	48	8	0	1303	317	84	5	90	335	0.19	1.74		21	12	0	1723	0	140
kilroma01	1888	1	BL2	AA	17	21	40	40	35	2	0	963	347	144	5	79	135		4.04		0	0	0	1264	0	224
kilromi01	1888	1	BL2	AA	0	1	1	1	1	0	0	27	12	8	1	5	1		8		0	0	0	0	0	9
kingsi01	1888	1	SL4	AA	45	21	66	65	64	6	0	1757	437	107	6	76	258		1.64		0	0	0	2294	1	205
kirbyjo01	1888	1	KC2	AA	1	4	5	5	5	0	0	129	48	20	0	7	11		4.19		0	0	0	0	0	36
knellph01	1888	1	PIT	NL	1	2	3	3	3	0	0	79	20	11	1	18	15	0.21	3.76		4	5	0	115	0	19
knoufed01	1888	1	SL4	AA	5	4	9	9	9	0	0	243	66	24	0	37	25		2.67		0	0	0	0	0	45
knoufed01	1888	2	CL3	AA	0	1	2	2	1	0	0	27	8	1	0	3	2		1		0	0	0	0	0	2
krockgu01	1888	1	CHN	NL	25	14	39	39	39	4	0	1019	295	92	20	45	161	0.22	2.44		14	9	0	1351	0	143
maddeki01	1888	1	BSN	NL	7	11	20	18	17	1	0	495	142	54	6	24	53	0.22	2.95		6	15	0	662	2	76
mainswi01	1888	1	CHN	NL	1	1	2	2	1	0	0	33	8	6	0	6	5	0.21	4.91		1	1	0	45	0	10
mattimi01	1888	1	PH4	AA	15	10	26	24	24	4	0	663	221	83	6	65	80		3.38		0	0	0	0	2	146
maulal01	1888	1	PIT	NL	0	2	3	1	1	0	0	51	26	12	0	5	12	0.34	6.35		2	0	0	81	2	20
maysal01	1888	1	BR3	AA	9	9	18	18	17	1	0	482	150	50	1	32	67		2.8		0	0	0	686	0	81
mccarto01	1888	1	SL4	AA	0	0	2	0	0	0	0	13	3	2	1	2	1		4.15		0	0	0	0	2	3
mcgeaja01	1888	1	IN3	NL	0	0	1	0	0	0	0	15	5	4	1	3	0	0.23	7.2		1	0	0	24	1	5
moffesa01	1888	1	IN3	NL	2	5	7	7	6	1	0	168	62	29	3	17	7	0.27	4.66		2	2	0	242	0	40
morried01	1888	1	PIT	NL	29	23	55	55	54	5	0	1440	470	123	7	74	135	0.24	2.31		13	8	0	2002	0	216
morrimi01	1888	1	CL3	AA	1	3	4	4	4	0	0	105	40	21	3	19	14		5.4		0	0	0	0	0	35
mullato01	1888	1	CN2	AA	26	16	44	42	41	4	1	1141	341	120	9	75	186		2.84		0	0	0	1504	2	194
oberldo01	1888	1	CL3	AA	1	2	3	3	3	0	0	77	27	15	2	18	23		5.26		5	1	0	129	0	33
obrieda02	1888	1	CL3	AA	11	19	30	30	30	1	0	777	245	95	5	99	135		3.3		0	0	0	0	0	162
odayha01	1888	1	WS8	NL	16	29	46	46	46	3	0	1209	359	139	19	117	186	0.23	3.1		17	16	0	1680	0	208
portehe01	1888	1	KC2	AA	18	37	55	54	53	4	0	1422	527	219	16	120	145		4.16		0	0	0	0	1	336
proesge01	1888	1	CL3	AA	3	4	7	7	7	1	0	177	53	25	4	30	20		3.81		0	0	0	0	0	39
radboch01	1888	1	BSN	NL	7	16	24	24	24	1	0	621	187	66	8	45	64	0.23	2.87		8	8	0	852	0	110
ramseto01	1888	1	LS2	AA	8	30	40	40	37	1	0	1027	362	130	10	86	228		3.42		0	0	0	0	0	278
ryanji01	1888	1	CHN	NL	4	0	8	2	1	0	0	115	47	13	2	12	11	0.29	3.05		2	0	0	170	5	29
sandebe01	1888	1	PHI	NL	19	10	31	29	28	8	0	826	240	58	3	33	121	0.22	1.9		14	3	1	1089	2	100
schoeju01	1888	1	IN3	NL	0	0	2	0	0	0	0	13	5	0	0	1	1	0.22	0		1	0	0	23	2	4
seradbi01	1888	1	CN2	AA	2	3	6	5	5	0	0	152	62	20	1	19	4		3.55		0	0	0	0	1	43
sewared01	1888	1	PH4	AA	35	19	57	57	57	6	0	1556	388	116	4	127	272		2.01		0	0	0	2075	0	203
shawdu01	1888	1	WS8	NL	0	3	3	3	3	0	0	75	36	18	2	7	8	0.33	6.48		2	0	0	115	0	24
shawsa01	1888	1	BL2	AA	2	4	6	6	6	0	0	159	65	20	2	15	22		3.4		0	0	0	0	0	37
shochge01	1888	1	WS8	NL	0	0	1	0	0	0	0	9	2	0	0	1	0	0.16	0		0	0	0	13	1	0
shrevle01	1888	1	IN3	NL	11	24	35	35	34	1	0	893	352	153	23	93	101	0.28	4.63		24	8	0	1325	0	208
smithel01	1888	1	CN2	AA	22	17	40	40	37	5	0	1045	309	106	1	89	154		2.74		0	0	0	1431	0	167
smithph01	1888	1	BL2	AA	14	19	35	32	31	0	0	876	249	117	5	137	152		3.61		0	0	0	1259	2	170
smithph01	1888	2	PH4	AA	2	1	3	3	3	0	0	66	21	7	0	10	19		2.86		4	0	0	101	0	15
sowdebi01	1888	1	BSN	NL	19	15	36	35	34	2	0	951	278	73	3	73	132	0.22	2.07		14	9	0	1311	1	155
staleha01	1888	1	PIT	NL	12	12	25	24	24	2	0	622	185	62	6	53	89	0.23	2.69		13	7	0	848	1	104
stemmbi01	1888	1	CL3	AA	0	2	2	2	2	0	0	48	37	16	0	9	7		9		2	5	0	114	0	42
stratsc01	1888	1	LS2	AA	10	17	33	28	28	2	0	809	287	109	7	53	97		3.64		0	0	0	0	5	196
striccu01	1888	1	CL3	AA	1	0	2	0	0	0	0	36	16	6	0	2	5		4.5		0	0	0	0	2	6
sullito01	1888	1	KC2	AA	8	16	24	24	24	0	0	644	227	81	2	68	84		3.4		28	24	0	941	0	146
tenerjo01	1888	1	CHN	NL	7	5	12	12	11	1	0	306	90	31	6	25	39	0.22	2.74		7	8	0	427	0	59
terryad01	1888	1	BR3	AA	13	8	23	23	20	2	0	585	145	44	2	67	138		2.03		0	0	0	825	0	79
titcoca01	1888	1	NY1	NL	14	8	23	23	22	4	0	591	149	49	4	46	129	0.2	2.24		12	5	0	792	0	91
toolest01	1888	1	KC2	AA	5	6	12	10	10	0	0	275	124	68	4	50	35		6.68		0	0	0	0	2	99
tucketo01	1888	1	BL2	AA	0	0	1	0	0	0	0	7	4	1	0	0	2		3.86		0	0	0	0	1	1
twitcla01	1888	1	DTN	NL	0	0	2	0	0	0	1	12	6	3	1	0	3	0.37	6.75		0	0	0	16	1	3
tyngji01	1888	1	PHI	NL	0	0	1	0	0	0	1	12	8	2	0	2	2	0.38	4.5		1	1	1	24	1	4
vanhage01	1888	1	CHN	NL	13	13	30	24	24	4	1	737	263	96	15	60	139	0.26	3.52		21	13	1	1057	6	149
viaule01	1888	1	CN2	AA	27	14	42	42	42	1	0	1163	331	114	7	110	164		2.65		0	0	0	1502	0	192
walkege01	1888	1	BL2	AA	1	3	4	4	4	1	0	105	36	23	2	14	18		5.91		5	0	0	155	0	31
welchmi01	1888	1	NY1	NL	26	19	47	47	47	5	0	1276	328	91	12	108	167	0.2	1.93		17	14	0	1710	0	156
weyhigu01	1888	1	PH4	AA	28	18	47	47	45	3	0	1212	314	101	4	111	204		2.25		0	0	0	1652	0	198
weyhijo01	1888	1	CN2	AA	3	4	8	8	7	0	0	197	52	9	0	17	30		1.23		0	0	0	0	0	26
whitapa01	1888	1	BL2	AA	1	1	2	2	2	0	0	42	13	8	0	6	5		5.14		0	2	0	61	0	12
whitnji01	1888	1	WS8	NL	18	21	39	39	37	2	0	975	317	110	7	54	79	0.24	3.05		7	9	1	1357	0	184
widnewi01	1888	1	WS8	NL	5	7	13	13	13	0	0	345	111	36	7	22	33	0.24	2.82		4	6	0	478	0	69
wiedmst01	1888	1	NY1	NL	1	1	2	2	2	0	0	54	17	7	2	8	5	0.23	3.5		0	2	0	84	0	20
woodge01	1888	1	PHI	NL	0	0	2	0	0	0	2	6	3	1	0	1	0	0.3	4.5		0	0	0	11	2	3
anderda01	1889	1	PHI	NL	0	1	5	2	1	0	0	69	30	19	2	14	8	0.3	7.43		1	0	0	95	3	21
anderva01	1889	1	IN3	NL	0	1	2	1	1	0	0	36	13	6	0	9	3	0.26	4.5		0	3	0	54	1	10
bakelje01	1889	1	CL4	NL	12	22	36	34	33	2	0	913	296	100	9	106	105	0.24	2.96		24	8	0	1287	2	169
baldwma01	1889	1	CL6	AA	27	34	63	59	54	6	1	1541	458	206	9	274	368		3.61		39	0	0	2256	4	358
batesjo01	1889	1	KC2	AA	0	1	1	1	1	0	0	24	15	12	0	5	3		13.5		0	0	0	0	0	14
bausege01	1889	1	PH4	AA	1	4	7	6	6	0	0	166	64	24	1	33	18		3.9		0	0	0	0	1	46
beamal01	1889	1	PIT	NL	1	1	2	2	2	0	0	54	11	13	0	15	1	0.17	6.5		3	0	0	85	0	16
beatied01	1889	1	CL4	NL	20	15	36	36	35	3	0	953	316	126	12	141	126	0.25	3.57		9	6	0	1382	0	179
bellch01	1889	1	KC2	AA	1	0	1	1	1	0	0	27	4	1	0	3	3		1		0	0	0	0	0	5
bishobi01	1889	1	CHN	NL	0	0	2	0	0	0	2	9	6	6	0	6	1	0.4	18		0	0	0	0	2	13
boylehe01	1889	1	IN3	NL	21	23	46	45	38	2	0	1136	422	165	14	95	97	0.27	3.92		10	14	0	1691	1	224
buffich01	1889	1	PHI	NL	28	16	47	43	37	2	0	1140	390	137	10	121	153	0.25	3.24		15	6	0	1661	4	196
burdibi01	1889	1	IN3	NL	2	4	10	4	2	0	1	137	58	23	7	13	16	0.3	4.53		1	0	0	163	5	42
carutbo01	1889	1	BR3	AA	40	11	56	50	46	7	1	1335	444	155	16	104	118		3.13		22	0	0	1827	6	215
caseyda01	1889	1	PHI	NL	6	10	20	20	15	1	0	458	170	64	4	72	65	0.27	3.77		7	8	0	781	0	92
chambel01	1889	1	SL4	AA	34	15	54	52	45	3	1	1265	376	139	18	165	202		2.97		17	0	0	1818	2	220
clarkjo01	1889	1	BSN	NL	49	19	73	72	68	8	1	1860	589	188	16	203	284	0.24	2.73		16	17	0	2736	1	280
colemjo01	1889	1	PH4	AA	3	2	5	5	4	0	0	102	38	11	2	14	6		2.91		0	0	0	0	0	23
comisch01	1889	1	SL4	AA	0	0	1	0	0	0	0	1	0	0	0	0	0		0		0	0	0	0	1	0
conovte01	1889	1	CN2	AA	0	0	1	0	0	0	1	6	4	3	0	2	1		13.5		0	0	0	0	1	4
conwaji01	1889	1	KC2	AA	19	19	41	37	33	0	0	1005	334	121	12	90	115		3.25		19	0	0	1448	4	232
conwape01	1889	1	PIT	NL	2	1	3	3	2	0	0	66	26	12	1	16	2	0.28	4.91		0	0	0	117	0	16
craneed01	1889	1	NY1	NL	14	10	29	25	23	0	0	690	221	94	10	136	130	0.24	3.68		18	10	0	1021	4	161
cunnibe01	1889	1	BL2	AA	16	19	39	33	29	0	1	838	306	151	11	141	140		4.87		20	0	0	1310	5	245
dailyed01	1889	1	CL6	AA	0	0	2	0	0	0	1	5	1	4	0	4	2		21.6		0	0	0	0	1	7
daleybi01	1889	1	BSN	NL	3	3	9	7	4	0	0	144	34	23	1	43	40	0.19	4.31		2	2	0	260	2	29
daybi01	1889	1	PHI	NL	0	3	4	3	2	0	0	57	16	11	0	23	20	0.22	5.21		1	0	0	116	1	24
devliji02	1889	1	SL4	AA	4	2	9	8	5	0	0	180	56	16	0	24	37		2.4		0	0	0	0	1	38
dunnian01	1889	1	PIT	NL	0	2	2	2	2	0	0	54	20	14	1	16	4	0.27	7		1	0	0	85	0	19
duryeje01	1889	1	CN2	AA	32	19	53	48	38	2	1	1203	372	114	9	127	183		2.56		20	0	0	1731	5	208
dwyerfr01	1889	1	CHN	NL	16	13	32	30	27	0	0	828	307	110	14	72	63	0.27	3.59		15	7	0	1225	2	177
eastoja01	1889	1	CL6	AA	1	0	4	1	1	0	1	54	13	7	0	21	7		3.5		0	0	0	0	3	8
ehretre01	1889	1	LS2	AA	10	29	45	38	35	1	0	1092	441	194	11	115	135		4.8		29	0	0	1591	7	287
ewingbu01	1889	1	NY1	NL	2	0	3	2	2	0	0	60	23	9	0	8	12	0.28	4.05		1	0	0	83	1	14
ewingjo01	1889	1	LS2	AA	6	30	40	39	37	1	0	993	407	179	6	147	155		4.87		13	0	0	1459	1	296
fannija01	1889	1	IN3	NL	0	1	1	1	0	0	0	3	3	2	0	2	0	0.5	18		0	0	0	0	0	3
feeja01	1889	1	IN3	NL	2	2	7	3	2	0	0	120	39	19	2	31	10	0.24	4.28		4	0	0	132	4	29
fersoal01	1889	1	WS8	NL	17	17	36	34	28	1	0	865	319	125	9	105	85	0.27	3.9		9	12	0	1274	2	199
fogarji01	1889	1	PHI	NL	0	0	4	0	0	0	0	12	4	4	0	2	0	0.25	9		1	0	0	0	3	4
foremfr01	1889	1	BL2	AA	23	21	51	48	43	5	0	1242	364	162	8	137	180		3.52		38	0	0	1506	3	257
foutzda01	1889	1	BR3	AA	3	0	12	4	3	0	0	179	70	29	2	19	21		4.37		0	0	0	0	6	50
galvipu01	1889	1	PIT	NL	23	16	41	40	38	4	0	1023	392	158	19	78	77	0.28	4.17		13	10	0	1495	1	233
garfibi01	1889	1	PIT	NL	0	2	4	2	2	0	0	87	45	25	2	17	4	0.34	7.76		3	1	0	118	2	35
gastrha01	1889	1	CL6	AA	10	16	32	26	21	0	0	668	255	113	8	104	115		4.57		27	0	0	1017	6	175
georgbi01	1889	2	CL6	AA	0	0	2	0	0	0	0	24	11	7	1	3	3		7.88		0	0	0	0	2	13
getzich01	1889	1	IN3	NL	18	22	45	44	36	0	1	1047	395	176	27	100	139	0.27	4.54		14	9	0	1655	1	256
glassja01	1889	1	IN3	NL	0	0	1	0	0	0	0	2	3	0	0	3	0	0.6	0		1	0	0	0	1	2
gleaski01	1889	1	PHI	NL	9	15	29	21	15	0	1	615	242	127	8	97	64	0.28	5.58		14	9	0	902	7	177
goetzge01	1889	1	BL2	AA	1	0	1	1	0	0	0	27	12	4	0	0	2		4		0	0	0	0	0	6
grubehe01	1889	1	CL4	NL	7	16	25	23	23	0	1	615	198	83	6	94	74	0.24	3.64		18	8	0	862	2	125
gumbead01	1889	1	CHN	NL	16	13	31	28	25	2	0	739	258	99	16	76	91	0.26	3.62		7	14	0	1070	3	148
haddoge01	1889	1	WS8	NL	11	19	33	31	30	0	0	829	299	129	10	123	106	0.26	4.2		16	9	0	1229	2	203
hatfigi01	1889	1	NY1	NL	2	4	6	5	5	0	0	156	53	23	2	25	28	0.25	3.98		3	1	0	207	1	43
healyjo01	1889	1	WS8	NL	1	11	13	12	10	0	0	303	139	70	2	38	49	0.31	6.24		10	5	0	505	1	111
healyjo01	1889	2	CHN	NL	1	4	5	5	5	0	0	138	48	23	4	18	22	0.26	4.5		3	4	0	208	0	35
heckegu01	1889	1	LS2	AA	5	13	19	16	15	0	0	454	215	94	7	47	33		5.59		15	0	0	719	3	145
hudsona01	1889	1	SL4	AA	3	2	9	5	4	0	0	180	71	28	2	15	13		4.2		0	0	0	0	4	47
hughemi01	1889	1	BR3	AA	9	8	20	17	13	0	0	459	172	74	6	86	54		4.35		4	0	0	694	3	120
hutchbi01	1889	1	CHN	NL	16	17	37	36	33	3	0	954	306	125	11	117	136	0.24	3.54		16	8	0	1231	1	206
irwinar01	1889	2	WS8	NL	0	0	1	0	0	0	0	3	1	0	0	0	0	0.25	0		0	0	0	5	0	1
jonesal01	1889	1	PIT	NL	1	0	1	1	1	0	0	27	7	3	0	1	10	0.2	3		0	0	0	37	0	5
keefege01	1889	1	WS8	NL	8	18	30	27	24	0	0	690	266	131	6	143	90	0.28	5.13		8	4	0	1124	3	182
keefeti01	1889	1	NY1	NL	28	13	47	45	39	3	1	1092	319	134	9	151	225	0.22	3.31		11	18	0	1704	2	212
kilroma01	1889	1	BL2	AA	29	25	59	56	55	5	0	1442	476	152	8	142	217		2.85		33	0	0	2000	3	283
kingsi01	1889	1	SL4	AA	34	17	55	52	46	2	1	1374	462	160	15	125	188		3.14		29	0	0	1920	2	257
knoufed01	1889	1	PH4	AA	2	0	3	3	2	0	0	75	37	11	2	9	5		3.96		0	0	0	0	0	17
krockgu01	1889	1	CHN	NL	3	3	7	7	5	0	0	182	86	33	10	14	16	0.32	4.9		0	2	0	295	0	43
krockgu01	1889	2	IN3	NL	2	2	4	4	3	0	0	96	48	26	2	14	10	0.33	7.31		1	0	0	166	0	38
krockgu01	1889	3	WS8	NL	2	4	6	6	6	0	0	144	65	28	1	22	17	0.31	5.25		1	1	0	234	0	50
krummal01	1889	1	PIT	NL	0	1	1	1	1	0	0	27	8	10	0	10	4	0.23	10		1	0	0	40	0	11
ladewst01	1889	1	KC2	AA	0	0	1	0	0	0	0	6	1	1	0	3	0		4.5		0	0	0	0	1	4
lovetto01	1889	1	BR3	AA	17	10	29	28	23	1	0	687	234	110	3	65	92		4.32		8	0	0	950	1	132
maddeki01	1889	1	BSN	NL	10	10	22	19	18	1	1	534	194	87	7	71	64	0.26	4.4		7	16	0	769	3	131
mattimi01	1889	1	PH4	AA	2	1	5	1	1	0	1	93	43	20	0	13	6		5.81		0	0	0	0	4	27
mattimi01	1889	2	KC2	AA	0	0	1	0	0	0	0	9	3	1	1	2	1		3		0	0	0	0	1	3
maulal01	1889	1	PIT	NL	1	4	6	4	4	0	0	126	64	46	3	28	11	0.34	9.86		4	1	0	185	2	53
maysal01	1889	1	CL6	AA	10	7	21	19	13	1	0	420	167	75	4	56	52		4.82		10	0	0	641	1	119
mccarjo01	1889	1	KC2	AA	8	6	15	14	13	0	0	359	147	52	4	61	36		3.91		0	0	0	0	1	108
mccarto01	1889	1	SL4	AA	0	0	1	0	0	0	0	15	4	4	0	6	1		7.2		0	0	0	0	1	4
mcdermi01	1889	1	LS2	AA	1	8	9	9	9	0	0	253	108	39	4	34	22		4.16		0	0	0	0	0	65
mcgeaja01	1889	1	IN3	NL	0	0	3	0	0	0	0	14	7	6	2	6	3	0.33	11.57		0	0	0	0	1	9
mcmahsa01	1889	1	PH4	AA	14	12	28	27	27	2	0	726	230	95	5	102	117		3.53		15	0	0	1097	1	160
morried01	1889	1	PIT	NL	6	13	21	21	18	0	0	510	196	78	4	48	40	0.28	4.13		3	6	0	835	0	107
morrijo01	1889	1	WS8	NL	0	0	1	0	0	0	0	1	0	0	0	0	0	0	0		0	0	0	0	0	0
mullato01	1889	1	CN2	AA	11	9	33	24	17	0	5	660	218	73	4	89	112		2.99		21	0	0	883	9	133
nashbi01	1889	1	BSN	NL	0	0	1	0	0	0	0	3	0	0	0	1	0	0	0		0	0	0	4	1	0
obrieda02	1889	1	CL4	NL	22	17	41	41	39	1	0	1040	345	160	9	167	122	0.25	4.15		27	24	0	1544	0	216
odayha01	1889	1	WS8	NL	2	10	13	13	11	0	0	324	117	52	7	57	23	0.26	4.33		4	6	0	516	0	88
odayha01	1889	2	NY1	NL	9	1	10	10	8	0	0	234	83	37	2	35	28	0.26	4.27		0	7	0	369	0	51
pearsfr01	1889	1	KC2	AA	0	2	3	2	2	0	0	66	21	12	2	9	5		4.91		0	0	0	0	1	16
pettych01	1889	1	CN2	AA	2	3	5	5	5	0	0	132	44	27	3	20	10		5.52		0	0	0	0	0	29
portehe01	1889	1	KC2	AA	0	3	4	4	3	0	0	69	52	32	0	14	9		12.52		0	0	0	0	0	46
radboch01	1889	1	BSN	NL	20	11	33	31	28	1	0	831	282	113	14	72	99	0.25	3.67		4	8	0	1163	2	151
ramseto01	1889	1	LS2	AA	1	16	18	18	15	0	0	420	175	87	7	71	60		5.59		0	0	0	0	0	152
ramseto01	1889	2	SL4	AA	3	1	5	3	3	0	0	123	44	18	0	10	33		3.95		0	0	0	0	2	29
raymoha01	1889	1	LS2	AA	1	0	1	1	1	0	0	27	8	1	0	11	1		1		2	0	0	42	0	2
robinbi01	1889	1	LS2	AA	0	1	1	1	1	0	0	24	10	9	2	6	2		10.13		2	0	0	40	0	10
rusieam01	1889	1	IN3	NL	12	10	33	22	19	1	0	675	246	133	12	116	109	0.27	5.32		9	9	0	953	11	181
sandebe01	1889	1	PHI	NL	19	18	44	39	34	1	1	1049	406	138	9	96	123	0.28	3.55		8	4	0	1539	4	217
sewared01	1889	1	PH4	AA	21	15	39	38	35	3	0	960	353	141	8	101	102		3.97		12	0	0	1355	1	212
shrevle01	1889	1	IN3	NL	0	3	3	3	1	0	0	47	25	24	3	12	5	0.35	13.79		2	0	0	0	0	27
smithel01	1889	1	CN2	AA	9	12	29	22	16	0	0	609	253	110	11	101	104		4.88		11	0	0	932	7	171
smithph01	1889	1	PH4	AA	2	3	5	5	5	0	0	129	53	21	2	25	12		4.4		1	1	0	205	0	31
sowdebi01	1889	1	BSN	NL	1	2	7	4	3	0	2	126	53	24	3	23	10	0.29	5.14		2	2	0	177	3	35
sowdebi01	1889	2	PIT	NL	6	5	13	11	9	0	0	158	94	43	1	29	33	0.37	7.35		5	0	0	211	2	55
sowdejo01	1889	1	KC2	AA	6	16	25	23	20	0	1	555	204	99	9	105	104		4.82		17	0	0	865	2	181
spragch01	1889	1	CL4	NL	0	2	2	2	2	0	0	51	27	16	0	10	8	0.34	8.47		1	2	0	93	0	31
sprined01	1889	1	LS2	AA	0	1	1	1	1	0	0	15	8	5	0	2	1		9		0	0	0	0	0	8
staleha01	1889	1	PIT	NL	21	26	49	47	46	1	1	1260	433	164	11	116	159	0.25	3.51		30	8	0	1791	2	254
stiveja01	1889	1	SL4	AA	12	7	26	20	18	2	1	575	153	48	4	68	143		2.25		16	0	0	814	6	85
stratsc01	1889	1	LS2	AA	3	13	19	17	13	0	1	401	157	48	6	42	42		3.23		3	0	0	610	2	126
sullimi02	1889	1	WS8	NL	0	3	9	3	3	0	0	123	47	33	2	32	15	0.27	7.24		7	3	0	187	6	47
sullito01	1889	1	KC2	AA	2	8	10	10	10	0	0	262	111	55	2	48	24		5.67		7	6	0	424	0	88
swartpa01	1889	1	KC2	AA	19	27	48	47	45	0	1	1231	481	197	21	117	147		4.32		35	0	0	1830	1	334
tenerjo01	1889	1	CHN	NL	15	15	35	30	28	1	0	861	302	116	16	105	105	0.26	3.64		9	7	0	1232	5	192
terryad01	1889	1	BR3	AA	22	15	41	39	35	2	0	978	285	119	6	126	186		3.29		25	0	0	1381	2	189
thornjo01	1889	1	WS8	NL	0	1	1	1	1	0	0	27	8	5	0	7	3	0.23	5		0	0	1	45	0	11
titcoca01	1889	1	NY1	NL	1	2	3	3	3	0	0	78	27	19	1	16	7	0.26	6.58		0	2	0	120	0	26
twitcla01	1889	1	CL4	NL	0	0	1	0	0	0	0	3	0	0	0	1	0	0	0		0	0	0	0	0	0
viaule01	1889	1	CN2	AA	22	20	47	42	38	1	1	1119	379	157	8	136	152		3.79		15	0	0	1612	5	224
welchmi01	1889	1	NY1	NL	27	12	45	41	39	3	2	1125	340	126	14	149	125	0.23	3.02		18	10	0	1548	4	196
weyhigu01	1889	1	PH4	AA	30	21	54	53	50	4	0	1347	382	147	15	212	213		2.95		37	0	0	1882	1	271
weyhijo01	1889	1	CL6	AA	0	0	1	0	0	0	0	3	1	3	0	4	0		27		0	0	0	0	1	3
whitapa01	1889	1	BL2	AA	1	0	1	1	1	0	0	27	10	2	0	4	1		2		0	0	0	0	0	4
whitnar01	1889	1	NY1	NL	0	1	1	0	0	0	0	18	7	2	0	3	3	0.28	3		0	0	0	0	1	5
whitnji01	1889	1	IN3	NL	2	7	9	8	7	0	0	210	106	53	4	19	16	0.33	6.81		2	2	0	309	1	73
widnewi01	1889	1	CL6	AA	12	20	41	34	25	2	1	882	368	170	11	85	63		5.2		10	0	0	1304	7	241
woodge01	1889	1	PHI	NL	0	0	1	0	0	0	0	3	2	2	0	0	2	0.4	18		0	0	0	0	1	2
woodpe01	1889	1	PHI	NL	1	1	3	2	2	0	0	57	28	11	0	3	8	0.33	5.21		0	0	0	70	1	15
abbotda01	1890	1	TL2	AA	0	2	3	1	1	0	1	39	19	9	0	8	1		6.23		0	0	0	0	2	14
anderda01	1890	1	PHI	NL	1	1	3	2	1	0	0	58	31	16	0	11	7	0.35	7.45		1	0	0	0	0	25
anderda01	1890	2	PIT	NL	2	11	13	13	13	0	0	324	116	56	2	49	41	0.26	4.67		4	7	0	491	0	84
bakelje01	1890	1	CLP	PL	12	25	43	38	32	0	0	979	412	162	13	147	67	9.99	4.47		19	7	0	1526	5	307
bakerki01	1890	1	PIT	NL	3	19	25	21	19	2	0	535	209	111	11	86	76	0.28	5.6		22	17	0	874	4	176
bakerno01	1890	1	BL3	AA	1	1	2	2	2	0	0	51	16	7	0	6	10		3.71		0	0	0	0	0	9
baldwla01	1890	1	BRO	NL	1	0	2	1	0	0	0	23	15	6	0	4	4	0.39	7.04		0	0	0	0	2	6
baldwla01	1890	2	BFP	PL	2	5	7	7	7	0	0	186	90	31	5	24	13	9.99	4.5		2	1	0	310	0	72
baldwma01	1890	1	CHP	PL	34	24	59	57	54	1	0	1503	498	184	10	249	211	9.99	3.31		31	12	0	2225	2	322
barrbo01	1890	1	RC2	AA	28	24	57	54	52	3	0	1480	458	178	7	219	209		3.25		29	16	0	2038	3	267
bartsch01	1890	1	CHP	PL	8	10	25	19	16	0	1	564	222	89	8	66	47	9.99	4.26		4	9	0	901	6	144
beatied01	1890	1	CL4	NL	22	30	54	54	53	1	0	1423	518	202	11	186	155	0.26	3.83		17	0	0	0	0	300
beeched01	1890	1	BFP	PL	0	0	1	0	0	0	0	18	10	8	0	3	0	9.99	12		0	0	0	0	1	8
blauvhe01	1890	1	RC2	AA	0	0	2	0	0	0	0	37	19	14	0	8	5		10.22		0	0	0	0	2	23
bowmasu01	1890	1	PHI	NL	0	0	1	1	0	0	0	24	11	7	0	2	2	0.31	7.88		1	0	0	0	0	7
bowmasu01	1890	2	PIT	NL	2	5	9	7	6	0	0	212	100	52	1	50	22	0.32	6.62		15	11	0	369	2	90
buckljo01	1890	1	BFP	PL	1	3	4	4	4	0	0	102	49	29	5	16	4	9.99	7.68		0	0	0	0	0	32
buffich01	1890	1	PHP	PL	19	15	36	33	28	0	1	850	312	120	8	126	89	9.99	3.81		10	6	0	1342	3	211
burkeje01	1890	1	NY1	NL	3	10	21	12	6	0	0	354	134	73	3	92	82	0.27	5.57		16	0	0	0	7	123
calihwi01	1890	1	RC2	AA	18	15	37	36	31	0	0	889	276	108	4	125	127		3.28		15	9	0	1204	1	170
carutbo01	1890	1	BRO	NL	23	11	37	33	30	1	0	900	292	103	9	87	64	0.24	3.09		9	0	0	0	4	163
caseyda01	1890	1	SR2	AA	19	22	45	42	40	2	0	1082	365	166	8	165	169		4.14		12	13	0	1320	3	249
chambel01	1890	1	SL4	AA	3	1	5	5	3	0	0	105	47	23	1	26	14		5.91		14	7	0		0	37
chambel01	1890	2	CL6	AA	12	6	25	21	19	6	0	525	128	43	2	70	114		2.21		0	0	0	765	3	69
clarkjo01	1890	1	BSN	NL	26	18	44	44	43	2	0	1149	370	139	14	140	138	0.24	3.27		21	0	0	0	0	186
clarksp01	1890	1	BFP	PL	0	0	1	0	0	0	0	12	8	3	0	2	2	9.99	6.75		0	0	0	0	1	4
colemjo01	1890	1	PIT	NL	0	2	2	2	1	0	0	42	28	15	1	6	3	0.4	9.64		1	0	0	73	0	23
colemjo02	1890	1	PHI	NL	0	1	1	1	0	0	0	5	4	4	0	3	2	0.44	21.6		2	0	0	0	0	8
cotteda01	1890	1	BFP	PL	0	1	1	1	1	0	0	27	18	14	1	7	0	9.99	14		0	0	0	0	0	19
coughro01	1890	1	CHN	NL	4	6	11	10	10	0	0	285	102	45	3	40	29	0.26	4.26		5	0	0	0	1	60
craneed01	1890	1	NYP	PL	16	19	43	35	28	0	0	991	323	170	12	210	117	9.99	4.63		39	11	0	1529	7	280
cunnibe01	1890	1	PHP	PL	3	9	14	11	11	0	0	326	133	63	0	67	33	9.99	5.22		0	0	0	0	3	103
cunnibe01	1890	2	BFP	PL	9	15	25	25	24	2	0	633	251	137	8	134	78	9.99	5.84		34	10	0	1419	0	190
cushmed01	1890	1	TL2	AA	17	21	40	38	34	0	1	947	346	147	5	107	125		4.19		8	11	0	1337	2	208
dailevi01	1890	1	CL4	NL	0	1	2	1	0	0	0	21	12	6	0	7	0	0.36	7.71		0	0	0	0	0	17
dailyed01	1890	1	BR4	AA	10	15	27	27	27	0	0	707	252	106	3	93	82		4.05		0	0	0	0	0	161
dailyed01	1890	2	NY1	NL	2	0	2	1	1	0	0	48	6	4	0	6	0	0.11	2.25		1	0	0	0	1	6
dailyed01	1890	3	LS2	AA	6	3	12	10	9	1	0	279	83	20	2	30	31		1.94		13	12	0	1134	2	35
daleybi01	1890	1	BSP	PL	18	7	34	25	19	2	2	705	246	94	7	167	110	9.99	3.6		0	6	0	1092	8	178
daniepe01	1890	1	PIT	NL	1	2	4	4	3	0	0	84	40	22	1	12	8	0.32	7.07		0	2	0	143	0	29
daybi01	1890	1	PHI	NL	1	1	4	2	2	0	0	71	26	8	0	12	9	0.27	3.04		0	0	0	0	2	16
daybi01	1890	2	PIT	NL	0	6	6	6	6	0	0	150	66	29	1	24	10	0.3	5.22		1	1	0	241	0	50
demarfr01	1890	1	CHN	NL	0	0	1	0	0	0	0	6	1	0	0	1	1	0.14	0		2	0	0	10	1	0
dewalch01	1890	1	CLP	PL	2	0	2	2	2	0	0	42	13	1	0	5	6	9.99	0.64		0	0	0	0	0	7
doefr01	1890	1	BFP	PL	0	1	1	1	1	0	0	18	10	8	0	7	2	9.99	12		0	0	0	35	0	10
doefr01	1890	2	PTP	PL	0	0	1	0	0	0	0	12	4	2	0	2	2	9.99	4.5		0	0	0	18	1	2
dolanjo01	1890	1	CIN	NL	1	1	2	2	2	0	0	54	17	9	3	10	9	0.24	4.5		0	0	0	0	0	13
dotyba01	1890	1	TL2	AA	1	0	1	1	1	0	0	27	9	1	0	1	4		1		0	0	0	0	0	1
dowseto01	1890	1	CL4	NL	0	0	1	0	0	0	0	15	6	3	0	1	0	0.28	5.4		0	0	0	0	1	3
duryeje01	1890	1	CIN	NL	16	12	33	32	29	2	0	822	270	89	11	60	108	0.25	2.92		14	0	0	0	1	148
duzenbi01	1890	1	BFP	PL	0	2	2	2	2	0	0	39	20	20	2	14	5	9.99	13.85		0	0	0	0	0	24
dwyerfr01	1890	1	CHP	PL	3	6	12	6	6	0	1	208	98	48	4	25	17	9.99	6.23		5	0	0	339	6	71
eastoja01	1890	1	CL6	AA	15	14	37	29	23	0	1	767	213	100	4	125	147		3.52		23	27	0	1108	8	148
ehretre01	1890	1	LS2	AA	25	14	43	38	35	4	2	1077	351	101	5	79	174		2.53		13	15	0	1519	5	182
eiteled01	1890	1	CHN	NL	0	1	1	1	0	0	0	6	5	5	0	1	1	0.45	22.5		0	0	0	0	0	7
elybo01	1890	1	SR2	AA	0	0	1	0	0	0	0	6	7	5	0	0	0		22.5		0	0	0	0	1	5
esperdu01	1890	1	PH4	AA	8	9	18	16	14	1	0	431	176	78	1	67	61		4.89		2	5	0	685	2	99
esperdu01	1890	2	PIT	NL	0	2	2	2	2	0	0	51	18	10	0	10	9	0.26	5.29		2	1	0	79	0	16
esperdu01	1890	3	PHI	NL	5	0	5	5	4	0	0	123	40	14	1	16	18	0.24	3.07		0	0	0	183	0	22
ewingbu01	1890	1	NYP	PL	0	1	1	1	1	0	0	27	11	4	1	3	2	9.99	4		0	0	1	39	0	5
ewingjo01	1890	1	NYP	PL	18	12	35	31	27	1	2	802	293	126	6	104	145	9.99	4.24		11	15	0	1213	4	196
fersoal01	1890	1	BFP	PL	1	7	10	10	7	0	0	213	88	43	5	40	13	9.99	5.45		2	1	0	331	0	66
fieldji01	1890	1	RC2	AA	1	0	2	1	1	0	1	29	7	3	0	4	2		2.79		0	0	0	0	1	4
fitzgjo01	1890	1	RC2	AA	3	8	11	11	8	1	0	234	77	35	0	45	35		4.04		0	0	0	0	0	51
fordto01	1890	1	CL6	AA	0	0	1	0	0	0	0	6	0	0	0	3	0		0		0	0	0	0	1	0
fordto01	1890	2	BR4	AA	0	6	7	6	6	0	0	147	70	28	2	32	12		5.14		0	0	0	0	1	60
foremfr01	1890	1	CIN	NL	13	10	25	24	20	0	0	595	201	87	6	89	57	0.25	3.95		7	0	0	0	1	139
foutzda01	1890	1	BRO	NL	2	1	5	2	2	0	2	87	29	6	0	6	4	0.25	1.86		1	0	0	0	3	10
francos01	1890	1	CHN	NL	0	0	1	0	0	0	0	6	3	3	0	2	0	0.33	13.5		0	0	0	0	1	3
galvipu01	1890	1	PTP	PL	12	13	26	25	23	1	0	651	275	105	3	49	35	9.99	4.35		7	6	0	1031	1	192
garfibi01	1890	1	CL4	NL	1	7	9	8	7	0	0	210	91	38	3	35	16	0.3	4.89		2	0	0	0	1	64
gastrha01	1890	1	CL6	AA	30	14	48	45	41	4	0	1204	312	131	8	135	199		2.94		32	20	0	1571	2	204
germale01	1890	1	BL3	AA	5	11	17	16	15	0	0	397	147	71	2	54	37		4.83		7	11	0	543	1	95
getzich01	1890	1	BSN	NL	23	17	40	40	39	4	0	1050	342	124	5	82	140	0.24	3.19		8	0	0	0	0	201
gibsoro01	1890	1	CHN	NL	1	0	1	1	1	0	0	27	6	0	0	2	1	0.18	0		1	0	0	0	0	1
gibsoro01	1890	2	PIT	NL	0	3	3	3	2	0	0	36	24	23	0	23	3	0.4	17.25		6	2	0	85	0	38
gilksbo01	1890	1	CL4	NL	2	2	4	3	3	0	0	95	34	15	0	9	5	0.26	4.26		1	0	0	0	1	17
gleasbi02	1890	1	CLP	PL	0	1	1	1	0	0	0	12	14	12	1	6	0	9.99	27		0	0	0	0	0	16
gleaski01	1890	1	PHI	NL	38	17	60	55	54	6	2	1518	479	148	8	167	222	0.24	2.63		11	0	1	0	5	253
goodahe01	1890	1	LS2	AA	8	5	18	13	8	1	4	327	94	41	2	51	46		3.39		5	9	0	435	5	73
graych01	1890	1	PIT	NL	1	4	5	4	3	0	0	93	48	26	0	24	10	0.34	7.55		6	4	0	176	1	35
greened01	1890	1	PH4	AA	7	15	25	22	20	1	1	573	267	123	4	94	56		5.8		11	9	0	775	3	184
grimjo01	1890	1	RC2	AA	0	0	1	0	0	0	0	10	3	0	0	4	3		0		0	0	0	0	1	3
grubehe01	1890	1	CLP	PL	22	23	48	44	39	1	0	1150	464	182	15	204	110	9.99	4.27		47	17	0	1848	4	352
gumbead01	1890	1	BSP	PL	23	12	39	33	27	1	0	832	338	122	18	86	81	9.99	3.96		0	8	0	1348	6	189
gumbebi01	1890	1	PIT	NL	4	6	10	10	8	0	0	238	96	46	0	31	18	0.29	5.22		2	7	0	367	0	71
haddoge01	1890	1	BFP	PL	9	26	35	34	31	0	0	872	366	186	15	149	123	9.99	5.76		31	7	0	1409	1	307
hartbi02	1890	1	SL4	AA	12	8	26	24	20	0	0	604	188	82	6	66	95		3.67		20	15	0	795	2	111
hatfigi01	1890	1	NYP	PL	1	1	3	0	0	0	1	23	8	3	1	4	3	9.99	3.52		0	0	0	0	3	8
haynefr01	1890	1	PIT	NL	0	0	1	0	0	0	0	12	7	6	2	5	1	0.37	13.5		0	0	0	24	1	9
healyjo01	1890	1	TL2	AA	22	21	46	46	44	2	0	1167	326	125	5	127	225		2.89		23	26	0	1556	0	201
heardch01	1890	1	PIT	NL	0	6	6	6	5	0	0	132	75	41	5	32	13	0.36	8.39		5	2	0	237	0	65
heckegu01	1890	1	PIT	NL	2	9	14	12	11	0	0	359	160	68	9	44	32	0.31	5.11		4	1	0	567	2	111
helmbho01	1890	1	PH4	AA	0	1	1	1	1	0	0	21	17	11	0	6	3		14.14		0	0	0	0	0	15
hemmige01	1890	1	CLP	PL	0	1	3	1	1	0	0	63	25	16	1	19	3	9.99	6.86		0	0	0	0	2	23
hemmige01	1890	2	BRP	PL	8	4	19	11	11	0	3	369	117	52	3	59	32	9.99	3.8		7	3	0	540	8	86
hughemi01	1890	1	BRO	NL	4	4	9	8	6	0	0	199	77	38	1	30	22	0.28	5.16		1	0	0	0	1	47
hughemi01	1890	2	PH4	AA	1	3	6	5	4	0	0	124	64	25	0	21	15		5.44		0	0	0	0	0	56
hustebi01	1890	1	PHP	PL	5	10	18	17	12	0	0	387	148	70	2	67	33	9.99	4.88		9	3	0	597	1	105
hutchbi01	1890	1	CHN	NL	42	25	71	66	65	5	2	1809	505	181	20	199	289	0.22	2.7		27	0	0	0	5	315
joneshe02	1890	1	PIT	NL	2	1	5	4	2	0	0	93	35	12	1	14	13	0.27	3.48		5	0	0	147	1	25
jonesmi01	1890	1	LS2	AA	2	0	3	3	2	0	0	66	21	8	2	9	6		3.27		0	0	0	97	0	12
keefege01	1890	1	BFP	PL	6	16	25	22	22	0	0	588	280	142	11	138	55	9.99	6.52		17	0	0	1004	3	229
keefejo01	1890	1	SR2	AA	17	24	43	41	36	2	0	1057	355	169	9	148	120		4.32		10	17	0	1431	2	234
keefeti01	1890	1	NYP	PL	17	11	30	30	23	1	0	687	228	86	6	85	88	9.99	3.38		17	8	0	1056	0	137
keffefr01	1890	1	SR2	AA	1	1	2	1	1	0	0	48	15	10	0	9	4		5.63		0	0	0	0	1	13
kellyki01	1890	1	BSP	PL	1	0	1	0	0	0	0	6	1	1	0	2	2	9.99	4.5		0	0	0	0	1	1
kilroma01	1890	1	BSP	PL	9	15	30	27	18	0	0	653	268	103	14	87	48	9.99	4.26		11	9	0	976	3	161
kingsi01	1890	1	CHP	PL	30	22	56	56	48	4	0	1383	420	138	5	163	185	9.99	2.69		13	17	0	1975	0	233
knausfr01	1890	1	CL6	AA	17	12	37	34	28	3	2	827	206	86	3	106	148		2.81		14	24	0	1071	3	131
knellph01	1890	1	PHP	PL	22	11	35	31	30	2	0	860	287	122	10	166	99	9.99	3.83		22	16	0	1318	4	199
krockgu01	1890	1	BFP	PL	0	3	4	3	3	0	0	75	43	17	1	15	5	9.99	6.12		0	0	0	0	1	37
lacke01	1890	1	PH4	AA	0	0	1	0	0	0	0	6	1	2	0	3	1		9		0	0	0	3	1	4
lawsoal01	1890	1	BSN	NL	0	1	1	1	1	0	0	27	12	4	0	4	1	0.31	4		0	0	0	0	0	7
lawsoal01	1890	2	PIT	NL	0	2	2	2	1	0	0	30	15	10	0	10	2	0.33	9		2	0	0	55	0	20
lewis01	1890	1	BFP	PL	0	1	1	1	0	0	0	9	13	20	3	7	1	9.99	60		0	0	0	0	0	20
lincoez01	1890	1	CL4	NL	3	11	15	15	13	0	0	354	157	58	1	53	22	0.31	4.42		6	0	0	0	0	102
lincoez01	1890	2	SR2	AA	0	3	3	3	2	0	0	60	33	23	1	4	6		10.35		0	0	0	0	0	27
lovetto01	1890	1	BRO	NL	30	11	44	41	39	4	0	1116	327	115	14	141	124	0.22	2.78		18	0	1	0	2	195
lubypa01	1890	1	CHN	NL	20	9	34	31	26	0	1	803	226	95	6	95	85	0.22	3.19		17	0	0	0	3	129
lynchja01	1890	1	BR4	AA	0	1	1	1	1	0	0	27	22	12	1	5	1		12		1	0	0	50	0	18
lyonsha01	1890	1	RC2	AA	0	0	1	0	0	0	0	11	8	5	0	1	2		12.27		0	0	0	0	0	7
lyonsto01	1890	1	SR2	AA	0	2	3	3	2	0	0	67	40	26	1	21	6		10.48		0	0	0	0	0	36
maddeki01	1890	1	BSP	PL	3	2	10	7	5	1	0	186	85	33	2	25	24	9.99	4.79		2	6	0	307	3	55
marsed01	1890	1	SR2	AA	9	5	16	14	14	0	0	364	132	63	2	49	59		4.67		5	5	0	405	2	80
mattimi01	1890	1	BR4	AA	6	13	19	19	19	0	0	535	201	90	3	76	33		4.54		10	10	0	587	0	149
maulal01	1890	1	PTP	PL	16	12	30	28	26	2	0	740	258	104	13	104	81	9.99	3.79		13	8	0	1056	2	189
maysal01	1890	1	CL6	AA	0	1	1	1	1	0	0	27	14	8	0	8	2		8		0	0	0	0	0	13
mcculch01	1890	1	BR4	AA	4	21	26	25	24	0	0	647	247	110	5	102	61		4.59		21	13	0	1009	1	174
mcculch01	1890	2	SR2	AA	1	2	3	3	3	0	0	78	29	21	1	14	8		7.27		0	0	0	0	0	25
mcfetja01	1890	1	PHI	NL	1	0	1	1	1	0	0	27	5	1	0	2	4	0.15	1		0	0	0	0	0	1
mcgilwi01	1890	1	CLP	PL	11	9	24	20	19	0	0	551	222	84	5	96	82	9.99	4.12		12	11	0	853	4	146
mcguide01	1890	1	RC2	AA	0	0	1	0	0	0	0	12	10	3	0	1	1		6.75		0	0	0	0	1	5
mcmahsa01	1890	1	PH4	AA	29	18	48	46	44	0	1	1230	414	152	5	133	225		3.34		0	0	0	2084	2	238
mcmahsa01	1890	2	BL3	AA	7	3	12	11	11	1	0	297	84	33	1	33	66		3		21	22	0	133	1	49
meakige01	1890	1	LS2	AA	12	7	28	21	16	3	1	576	173	62	4	63	123		2.91		16	8	0	758	7	100
millebo01	1890	1	RC2	AA	3	7	13	12	11	0	1	277	89	44	2	26	20		4.29		5	4	0	402	1	58
morried01	1890	1	PTP	PL	8	7	18	15	15	1	0	433	178	78	5	35	25	9.99	4.86		2	4	0	615	3	116
morrimi01	1890	1	SR2	AA	6	9	17	14	13	1	0	381	131	83	4	81	69		5.88		0	0	0	0	3	112
morrimi01	1890	2	BL3	AA	1	2	4	4	3	0	0	78	15	11	0	20	13		3.81		21	11	0	616	0	20
mullato01	1890	1	CIN	NL	12	10	25	21	21	0	1	627	175	52	7	96	91	0.22	2.24		12	0	0	0	4	101
murphbo01	1890	1	NY1	NL	1	0	3	2	1	0	0	54	23	11	0	10	8	0.3	5.5		1	0	0	0	1	17
murphbo01	1890	2	BR4	AA	3	9	12	12	10	0	0	288	121	61	6	46	26		5.72		0	0	0	0	0	95
murphco01	1890	1	BRP	PL	4	10	20	14	11	0	2	417	168	74	2	82	29	9.99	4.79		9	4	0	701	6	134
nashbi01	1890	1	BSP	PL	0	0	1	0	0	0	0	1	1	0	0	0	0	9.99	0		0	0	0	0	1	0
nealejo01	1890	1	SL4	AA	5	3	10	9	8	0	0	207	53	26	4	15	23		3.39		9	6	0	349	1	37
nichoki01	1890	1	BSN	NL	27	19	48	47	47	7	0	1272	374	105	8	112	222	0.22	2.23		30	12	0	1744	1	175
nicolge01	1890	1	SL4	AA	2	1	3	3	2	0	0	51	11	9	1	19	16		4.76		0	0	0	0	0	13
obrieda02	1890	1	CLP	PL	8	16	25	25	22	0	0	619	229	78	9	93	54	9.99	3.4		22	17	0	978	0	171
odayha01	1890	1	NYP	PL	22	13	43	35	32	1	3	987	356	154	11	163	94	9.99	4.21		18	14	0	1507	7	249
oneiled01	1890	1	TL2	AA	0	2	2	2	2	0	0	48	27	14	0	13	2		7.88		2	0	0	87	0	18
oneiled01	1890	2	PH4	AA	0	6	6	6	6	0	0	156	84	56	0	32	17		9.69		10	5	0	278	0	77
orourmi01	1890	1	BL3	AA	1	2	5	5	5	0	0	123	45	18	0	10	8		3.95		0	2	0	186	0	19
osborfr01	1890	1	PIT	NL	0	5	8	5	5	0	0	174	82	54	6	45	14	0.32	8.38		16	8	0	318	3	87
parsoch01	1890	1	CL4	NL	0	1	2	1	0	0	0	27	12	6	0	6	2	0.31	6		0	0	0	0	1	11
phillbi02	1890	1	PIT	NL	1	9	10	10	9	0	0	246	123	69	8	29	25	0.33	7.57		7	1	0	402	0	97
powerji01	1890	1	BR4	AA	1	2	4	2	2	0	0	90	38	19	1	16	3		5.7		0	0	0	0	2	29
pricebi01	1890	1	PH4	AA	1	0	1	1	1	0	0	27	6	2	0	7	1		2		0	0	0	7	0	3
radboch01	1890	1	BSP	PL	27	12	41	38	36	1	0	1029	352	126	8	100	80	9.99	3.31		11	11	0	1486	3	183
radfopa01	1890	1	CLP	PL	0	0	1	0	0	0	0	15	7	2	1	1	3	9.99	3.6		0	0	0	0	1	5
ramseto01	1890	1	SL4	AA	24	17	44	40	34	1	0	1046	325	143	10	102	257		3.69		31	10	0	1380	4	221
rhinebi01	1890	1	CIN	NL	28	17	46	45	45	6	0	1204	337	87	6	113	182	0.22	1.95		14	0	1	0	1	163
rusieam01	1890	1	NY1	NL	29	34	67	63	56	4	1	1646	436	156	3	289	341	0.21	2.56		36	0	0	0	5	300
sandebe01	1890	1	PHP	PL	19	18	43	40	37	2	1	1040	412	145	13	69	107	9.99	3.76		8	10	0	1504	3	237
schmicr01	1890	1	PIT	NL	1	9	11	10	9	1	0	250	108	54	3	42	35	0.3	5.83		4	8	0	419	1	98
sewared01	1890	1	PH4	AA	6	12	21	19	15	1	0	462	165	81	4	72	55		4.73		8	8	0	657	2	105
sharrja01	1890	1	NY1	NL	11	10	25	20	18	0	0	552	162	59	3	88	84	0.22	2.89		8	0	0	0	6	107
smithed01	1890	1	CL4	NL	1	4	6	6	5	0	0	132	42	21	1	10	11	0.24	4.3		1	0	0	0	0	24
smithfr02	1890	1	TL2	AA	19	13	35	34	31	2	0	858	273	104	13	90	116		3.27		12	11	0	1183	1	155
smithph01	1890	1	PHI	NL	8	12	24	20	19	1	0	612	209	97	5	89	81	0.25	4.28		7	0	0	0	4	125
smithph01	1890	2	PIT	NL	1	3	5	5	5	0	0	132	39	15	0	13	15	0.23	3.07		4	2	0	185	0	25
sommejo01	1890	1	CL4	NL	0	0	1	0	0	0	0	3	2	0	1	2	0	0.4	0		0	0	0	0	1	3
sowdebi01	1890	1	PIT	NL	3	8	15	11	9	0	0	318	117	52	1	24	30	0.27	4.42		7	2	0	490	4	77
sowdejo01	1890	1	BRP	PL	19	16	39	37	28	1	0	927	358	131	3	161	91	9.99	3.82		13	9	0	1486	2	233
spragch01	1890	1	TL2	AA	9	5	19	12	9	0	0	368	111	53	0	78	59		3.89		20	20	0	591	5	83
staffge01	1890	1	BFP	PL	3	9	12	12	11	0	0	294	123	56	8	43	21	9.99	5.14		3	1	0	502	0	89
staleha01	1890	1	PTP	PL	21	25	46	46	44	3	0	1163	392	139	5	74	145	9.99	3.23		18	10	0	1625	0	246
stechch01	1890	1	PH4	AA	0	10	10	10	9	0	0	204	111	78	1	60	18		10.32		0	0	0	0	0	110
steined01	1890	1	CHN	NL	12	6	20	18	14	1	0	482	147	68	9	83	65	0.23	3.81		9	0	0	0	2	100
sterljo01	1890	1	PH4	AA	0	1	1	1	1	0	0	15	16	12	1	4	1		21.6		0	1	0	34	0	12
stineha01	1890	1	PH4	AA	0	1	1	1	1	0	0	24	17	8	0	4	1		9		0	0	0	0	0	9
stiveja01	1890	1	SL4	AA	27	21	54	46	41	3	0	1258	399	164	14	179	289		3.52		33	14	0	1782	8	255
stratsc01	1890	1	LS2	AA	34	14	50	49	44	4	0	1293	398	113	3	61	207		2.36		11	12	0	1777	1	186
sullibi02	1890	1	SR2	AA	1	4	6	6	4	0	0	126	51	37	2	27	13		7.93		0	0	0	0	0	50
sullimi02	1890	1	CHN	NL	5	6	12	12	10	0	0	288	108	49	3	58	33	0.27	4.59		6	0	0	0	0	77
sundabi01	1890	1	PIT	NL	0	0	1	0	0	0	0	0	2	2	0	0	0	1			0	0	0	2	0	2
swarted01	1890	1	TL2	AA	0	0	1	0	0	0	0	9	2	1	0	0	1		3		0	0	0	8	1	1
taberjo01	1890	1	BSN	NL	0	1	2	1	1	0	1	39	11	6	0	8	3	0.22	4.15		0	0	1	0	1	8
tebeage01	1890	1	TL2	AA	0	0	1	0	0	0	0	15	9	5	0	5	0		9		0	0	0	0	1	8
tenerjo01	1890	1	PTP	PL	3	11	14	14	13	0	0	351	160	95	6	70	30	9.99	7.31		15	4	0	626	0	147
terryad01	1890	1	BRO	NL	26	16	46	44	38	1	0	1110	362	121	3	133	185	0.24	2.94		27	0	0	0	2	200
titcoca01	1890	1	RC2	AA	10	9	20	19	19	1	0	506	168	70	6	97	73		3.74		14	12	0	797	1	123
toolest01	1890	1	BR4	AA	2	4	6	6	6	0	0	160	47	24	0	39	10		4.05		0	0	0	0	0	32
twitcla01	1890	2	BFP	PL	5	7	13	12	12	0	0	313	112	53	3	72	29	9.99	4.57		9	12	0	508	1	77
vanhage01	1890	1	BRP	PL	15	10	28	25	23	0	2	669	272	106	8	89	48	9.99	4.28		11	19	0	1064	3	190
viaule01	1890	1	CIN	NL	7	5	13	10	7	1	0	270	97	45	8	39	41	0.26	4.5		1	0	0	0	3	69
viaule01	1890	2	CL4	NL	4	9	13	13	13	1	0	321	101	40	4	42	30	0.24	3.36		3	0	0	0	0	65
vicketo01	1890	1	PHI	NL	24	22	46	46	41	2	0	1146	405	146	8	184	162	0.26	3.44		23	0	1	0	0	250
vonfrto01	1890	1	BSN	NL	0	1	1	1	1	0	0	24	23	9	0	8	2	0.49	10.13		1	0	0	52	0	16
wadswja01	1890	1	CL4	NL	2	16	20	19	19	0	0	509	202	98	6	81	26	0.28	5.2		12	0	0	0	1	139
welchcu01	1890	1	PH4	AA	0	0	1	0	0	0	0	3	6	6	0	0	1		54		0	0	0	0	1	6
welchmi01	1890	1	NY1	NL	17	14	37	37	33	2	0	877	268	97	5	122	97	0.23	2.99		6	0	0	0	0	145
weyhigu01	1890	1	BRP	PL	30	16	49	46	38	3	0	1170	419	156	10	179	177	9.99	3.6		19	18	0	1774	3	250
whitede01	1890	1	BFP	PL	0	0	1	0	0	0	0	24	18	8	0	2	0	9.99	9		0	0	0	0	1	15
whitnji01	1890	1	PH4	AA	2	2	6	4	3	0	0	120	61	23	1	11	6		5.18		0	0	0	0	2	27
whitrbi01	1890	1	SL4	AA	5	6	16	11	10	0	1	315	104	41	2	40	39		3.51		12	8	0	411	5	62
widnewi01	1890	1	CL6	AA	4	8	13	10	8	1	0	288	103	35	3	24	14		3.28		5	3	0	450	3	52
willigu01	1890	1	BR4	AA	0	1	2	2	1	0	0	36	13	10	0	12	2		7.5		0	0	0	0	0	15
youngcy01	1890	1	CL4	NL	9	7	17	16	16	0	0	443	145	57	6	30	39	0.24	3.47		7	5	0	607	1	87
zieglge01	1890	1	PIT	NL	0	1	1	1	0	0	0	18	12	7	0	0	1	0.4	10.5		2	0	0	30	0	7
bakelje01	1891	1	WS9	AA	2	10	13	12	11	0	0	313	127	62	6	60	32		5.35		0	0	0	0	1	107
bakelje01	1891	2	BL3	AA	4	2	8	6	5	0	0	177	48	15	1	30	13		2.29		0	0	0	0	2	32
baldwma01	1891	1	PIT	NL	22	28	53	50	48	2	0	1313	385	134	10	227	197	0.22	2.76		24	0	0	0	3	278
barrbo01	1891	1	NY1	NL	0	4	5	4	2	0	0	81	47	16	1	12	11	0.36	5.33		1	0	0	0	1	25
beatied01	1891	1	CL4	NL	0	3	5	4	2	0	0	87	39	17	1	21	4	0.31	5.28		1	0	0	0	1	44
bellch01	1891	1	LS2	AA	2	6	10	9	8	0	0	231	93	40	4	20	16		4.68		2	0	0	357	1	65
bellch01	1891	2	CN3	AA	1	0	1	1	1	0	0	27	2	0	0	3	1		0		0	0	0	0	0	2
boonege01	1891	1	LS2	AA	0	0	4	1	0	0	1	45	15	13	0	9	4		7.8		0	0	0	0	3	15
bowmasu01	1891	1	PH4	AA	2	5	8	8	8	0	0	204	73	26	0	37	22		3.44		0	0	0	0	0	54
breitte01	1891	1	SL4	AA	2	0	6	1	1	1	1	86	15	7	2	14	13		2.2		0	0	0	0	5	14
brynato01	1891	1	BSN	NL	0	1	1	1	0	0	0	3	4	6	0	3	0	0.57	54		0	0	0	0	0	6
buffich01	1891	1	BS2	AA	29	9	48	43	33	2	1	1091	303	103	8	120	158		2.55		0	0	0	0	4	153
burreha01	1891	1	SL4	AA	4	2	7	4	3	0	0	129	51	23	4	21	19		4.81		0	0	0	0	3	36
calihwi01	1891	1	PH4	AA	6	6	13	11	11	0	0	336	151	80	7	47	28		6.43		4	0	0	522	2	103
carseki01	1891	1	WS9	AA	14	37	54	53	46	1	0	1245	513	230	17	161	174		4.99		22	0	0	1810	1	358
carutbo01	1891	1	BRO	NL	18	14	38	32	29	2	1	891	323	103	7	107	69	0.26	3.12		12	0	0	0	6	185
cassied01	1891	1	PHI	NL	1	3	6	4	3	0	0	114	40	12	0	16	10	0.26	2.84		7	0	0	0	2	20
cassied01	1891	2	WS9	AA	2	4	7	5	5	0	0	159	73	33	4	35	14		5.6		0	0	0	0	2	63
chambel01	1891	1	PH4	AA	22	23	49	46	44	0	0	1217	397	190	10	206	204		4.22		22	0	0	1760	3	263
clarkda01	1891	1	CL6	AA	1	2	5	3	2	0	0	69	32	16	0	16	3		6.26		0	0	0	0	2	21
clarkda02	1891	1	NY1	NL	1	2	5	2	1	0	0	84	24	9	0	18	11	0.22	2.89		4	0	0	0	2	23
clarkjo01	1891	1	BSN	NL	33	19	55	51	47	3	3	1382	435	143	18	154	141	0.24	2.79		14	0	0	0	4	244
coughro01	1891	1	NY1	NL	3	4	8	7	6	0	0	183	74	26	5	23	22	0.28	3.84		9	0	0	0	1	50
craneed01	1891	1	CN3	AA	14	14	32	31	25	1	0	750	216	68	3	139	122		2.45		16	0	0	962	1	151
craneed01	1891	2	CIN	NL	4	8	15	13	11	1	0	350	134	53	3	64	51	0.27	4.09		5	0	0	0	2	91
cunnibe01	1891	1	BL3	AA	11	14	30	25	21	0	0	713	241	106	8	138	59		4.01		20	0	0	857	5	181
dailyed01	1891	1	LS2	AA	4	8	15	14	11	0	0	334	149	71	6	48	27		5.74		10	0	0	478	1	109
daleybi01	1891	1	BS2	AA	8	6	19	11	10	0	2	380	119	42	6	81	68		2.98		8	0	0	473	8	76
daviege01	1891	1	ML3	AA	7	5	12	12	12	1	0	306	94	30	2	35	61		2.65		3	0	0	398	0	48
davisge01	1891	1	CL4	NL	0	1	3	0	0	0	1	12	8	7	0	3	4	0.4	15.75		0	0	0	0	3	8
dolanjo01	1891	1	CL6	AA	12	11	27	24	19	0	0	610	216	94	8	84	68		4.16		7	0	0	783	3	131
doranjo01	1891	1	LS2	AA	5	10	15	14	12	1	0	378	160	76	3	75	55		5.43		10	0	0	565	1	111
dukema01	1891	1	WS9	AA	0	3	4	3	2	0	0	69	36	19	0	19	5		7.43		0	0	0	0	1	33
dunnian01	1891	1	NY1	NL	0	1	1	1	0	0	0	6	3	1	1	3	2	0.33	4.5		1	0	0	0	0	5
duryeje01	1891	1	CIN	NL	1	9	10	10	8	0	0	231	101	46	4	25	23	0.3	5.38		10	0	0	0	0	67
duryeje01	1891	2	SL4	AA	1	1	3	3	2	0	0	72	19	9	0	10	13		3.38		0	0	0	0	0	13
dwyerfr01	1891	1	CN3	AA	13	19	35	31	29	1	0	867	332	145	10	124	101		4.52		0	0	0	0	4	225
dwyerfr01	1891	2	ML3	AA	6	4	10	10	10	0	0	258	92	21	2	21	27		2.2		0	0	0	0	0	41
eastoja01	1891	1	CL6	AA	5	10	18	16	13	0	0	406	145	68	3	59	52		4.52		15	0	0			111
eastoja01	1891	2	SL4	AA	3	2	7	6	4	0	0	143	48	27	3	23	22		5.1		0	0	0	0	1	38
eastoja01	1891	3	CL6	AA	0	2	2	2	2	0	0	45	15	6	2	4	13		3.6		2	0	0			8
ehretre01	1891	1	LS2	AA	13	13	26	24	23	2	0	662	225	85	2	70	76		3.47		10	0	0	834	2	150
eiteled01	1891	1	WS9	AA	1	5	8	7	6	0	0	184	79	42	3	41	23		6.16		0	0	0	0	1	67
esperdu01	1891	1	PHI	NL	20	15	39	36	25	1	1	888	302	117	8	121	108	0.25	3.56		5	0	0	0	2	185
ewingjo01	1891	1	NY1	NL	21	8	33	30	28	5	0	808	237	68	2	105	138	0.22	2.27		9	0	0	0	3	118
fitzgjo02	1891	1	BS2	AA	1	1	6	3	2	0	1	96	49	20	2	11	16		5.63		0	0	0	0	3	32
fitzgwa01	1891	1	LS2	AA	14	17	33	32	29	3	0	828	280	110	6	95	111		3.59		8	0	0	1054	1	170
foremfr01	1891	2	WS9	AA	18	20	43	41	39	1	1	1036	381	143	9	142	170		3.73		17	0	0	1423	2	245
foutzda01	1891	1	BRO	NL	3	2	6	5	5	0	0	156	51	19	1	16	14	0.24	3.29		0	0	0	0	1	24
freembu01	1891	1	WS9	AA	3	2	5	4	4	0	0	132	35	19	0	33	28		3.89		0	0	0	0	1	32
galvipu01	1891	1	PIT	NL	14	14	33	31	23	2	0	740	256	79	10	62	46	0.25	2.88		6	12	0	1093	2	143
gastrha01	1891	1	CL6	AA	12	19	35	33	28	1	0	851	280	119	7	136	109		3.78		20	0	0	1200	2	196
getzich01	1891	1	BSN	NL	4	5	11	9	7	0	0	267	112	38	4	23	29	0.29	3.84		2	0	0	0	2	62
getzich01	1891	2	CL4	NL	0	1	1	1	1	0	0	27	12	8	1	4	4	0.3	8		1	0	0	0	0	9
gleaski01	1891	1	PHI	NL	24	22	53	44	40	1	1	1254	431	163	10	165	100	0.25	3.51		17	0	0	0	9	237
gormljo01	1891	1	PHI	NL	0	1	1	1	1	0	0	24	10	5	0	5	2	0.29	5.63		0	0	0	35	0	8
griffcl01	1891	1	SL4	AA	11	8	27	17	12	0	0	559	195	69	8	58	68		3.33		0	0	0	0	10	122
griffcl01	1891	2	BS2	AA	3	1	7	4	3	0	0	120	47	25	3	15	20		5.63		0	0	0	0	3	33
grubehe01	1891	1	CL4	NL	17	22	44	40	35	1	0	1046	407	160	10	119	79	0.28	4.13		20	0	0	0	4	258
gumbead01	1891	1	CHN	NL	17	11	32	31	24	1	0	769	282	102	5	90	73	0.26	3.58		6	0	0	0	1	149
haddoge01	1891	1	BS2	AA	34	11	51	47	37	5	1	1139	330	105	8	137	169		2.49		18	0	0	1373	4	172
hatfigi01	1891	1	WS9	AA	0	0	4	0	0	0	0	54	29	22	1	14	3		11		0	0	0	0	4	28
healyjo01	1891	1	BL3	AA	8	10	23	22	19	0	0	511	179	71	6	57	54		3.75		11	0	0	402	1	124
hemmige01	1891	1	BRO	NL	8	15	27	22	19	1	1	599	231	110	11	84	83	0.27	4.96		10	0	0	0	5	173
hugheji01	1891	1	ML3	AA	1	0	2	1	1	0	0	45	18	5	0	3	9		3		0	0	0	0	1	6
hutchbi01	1891	1	CHN	NL	44	19	66	58	56	4	1	1683	508	175	26	178	261	0.23	2.81		25	0	0	0	8	283
inksbe01	1891	1	BRO	NL	3	10	13	13	11	1	0	289	99	43	2	43	47	0.25	4.02		5	0	0	0	0	70
keefege01	1891	1	WS9	AA	0	3	5	4	4	0	1	111	44	11	0	17	11		2.68		0	0	0	0	1	42
keefeti01	1891	1	NY1	NL	2	5	8	7	4	0	0	165	71	32	1	27	29	0.3	5.24		5	1	0	267	1	57
keefeti01	1891	2	PHI	NL	3	6	11	10	9	0	1	235	84	34	2	28	35	0.26	3.91		5	6	0	349	1	55
keenaki01	1891	1	CN3	AA	0	1	1	1	1	0	0	24	6	0	0	4	5		0		0	0	0	0	0	9
kellyki01	1891	1	CN3	AA	0	1	3	0	0	0	0	46	21	9	2	7	0		5.28		0	0	0	0	2	15
kileyjo01	1891	1	BSN	NL	0	1	1	1	1	0	0	24	13	6	3	5	1	0.35	6.75		1	0	0	0	0	9
killefr01	1891	1	ML3	AA	7	4	11	11	11	2	0	290	73	18	1	51	38		1.68		4	0	0	374	0	42
killehe01	1891	1	CL4	NL	0	1	1	1	1	0	0	26	11	6	1	8	3	0.29	6.23		0	0	0	0	0	8
kilroma01	1891	1	CN3	AA	1	4	7	6	4	0	0	136	51	15	1	19	6		2.98		0	0	0	0	1	42
kilromi01	1891	1	PHI	NL	0	2	3	1	0	0	0	30	15	11	1	4	3	0.33	9.9		1	0	0	0	2	14
kingsi01	1891	1	PIT	NL	14	29	48	44	40	3	1	1153	382	133	7	144	160	0.24	3.11		22	0	0	0	4	243
klingbi01	1891	1	PHI	NL	4	2	12	7	4	0	0	225	90	36	2	32	26	0.28	4.32		6	0	0	0	5	61
knausfr01	1891	1	CL4	NL	0	3	3	3	1	0	0	45	23	12	2	8	6	0.33	7.2		0	0	0	0	0	29
knellph01	1891	1	CL6	AA	28	27	58	52	47	5	0	1386	363	150	4	226	228		2.92		24	0	0	1745	5	228
leipeja01	1891	1	CL6	AA	2	2	6	5	4	0	0	135	41	27	3	39	19		5.4		0	0	0	0	1	43
lovetto01	1891	1	BRO	NL	23	19	44	43	39	3	0	1097	361	150	14	129	129	0.24	3.69		21	0	0	0	1	229
lowebo01	1891	1	BSN	NL	0	0	1	0	0	0	0	3	3	1	0	1	0	0.5	9		0	0	0	0	1	1
lubypa01	1891	1	CHN	NL	8	11	30	24	18	0	1	618	221	109	11	94	52	0.26	4.76		10	0	0	0	6	148
lystobi01	1891	1	CL6	AA	0	1	1	1	1	0	0	18	10	7	0	6	1		10.5		0	1	0	35	0	8
maceji01	1891	1	WS9	AA	0	1	3	1	1	0	0	48	18	13	0	8	3		7.31		0	0	0	0	1	14
maddeki01	1891	1	BS2	AA	0	1	1	1	1	0	0	24	10	6	2	6	6		6.75		0	0	0	0	0	12
maddeki01	1891	2	BL3	AA	13	12	32	27	20	1	1	672	239	102	4	88	56		4.1		10	0	0	625	5	168
mainswi01	1891	1	CN3	AA	12	12	30	23	19	0	0	612	196	61	3	107	76		2.69		10	0	0	776	6	127
mainswi01	1891	2	ML3	AA	0	2	2	2	1	0	0	30	14	12	1	10	2		10.8		0	0	0	0	0	19
maulal01	1891	1	PIT	NL	1	2	8	3	3	0	1	117	44	10	0	16	13	0.27	2.31		2	0	0	0	5	22
mccarto01	1891	1	SL4	AA	0	0	1	0	0	0	0	3	2	1	0	0	0		9		0	0	0	0	1	2
mcgilwi01	1891	1	CN3	AA	2	5	8	8	6	0	0	195	69	36	1	37	19		4.98		0	0	0	0	0	56
mcgilwi01	1891	2	SL4	AA	19	10	35	31	22	1	1	747	225	81	10	131	154		2.93		0	0	0	0	4	155
mcmahsa01	1891	1	BL3	AA	35	24	61	58	53	5	1	1509	493	157	13	149	219		2.81		12	0	0	1601	3	259
meakige01	1891	1	PH4	AA	1	4	6	6	4	0	0	105	51	27	1	22	13		6.94		0	0	0	0	0	45
meekijo01	1891	1	LS2	AA	10	16	29	26	25	2	0	684	227	109	2	113	144		4.3		15	0	0	857	3	158
millebo01	1891	1	WS9	AA	2	5	7	7	3	0	0	126	53	20	3	24	13		4.29		0	0	0	0	0	51
mullato01	1891	1	CIN	NL	23	26	51	47	42	1	0	1279	390	153	15	187	124	0.23	3.23		18	0	0	0	4	250
nealejo01	1891	1	SL4	AA	6	4	15	11	9	1	1	331	109	52	4	36	24		4.24		0	0	0	0	4	73
nichoki01	1891	1	BSN	NL	30	17	52	48	45	5	3	1276	413	113	15	103	240	0.24	2.39		16	17	0	1806	4	219
nicolge01	1891	1	CHN	NL	0	1	3	2	0	0	0	33	14	6	0	10	12	0.29	4.91		2	0	0	0	1	20
obrieda02	1891	1	BS2	AA	18	13	40	30	22	0	2	806	300	109	13	127	87		3.65		16	0	0	1161	9	197
quarlbi01	1891	1	WS9	AA	1	1	3	2	2	0	0	66	32	20	1	12	10		8.18		0	0	0	0	1	27
radboch01	1891	1	CIN	NL	11	13	26	24	23	2	0	654	236	103	13	62	54	0.26	4.25		8	13	0	951	2	149
radfopa01	1891	1	BS2	AA	0	0	1	0	0	0	0	3	0	0	0	0	0		0		0	0	0	0	0	0
rettgge01	1891	1	SL4	AA	7	3	14	12	10	1	1	278	85	35	4	51	49		3.4		7	0	0	384	2	63
rhinebi01	1891	1	CIN	NL	17	24	48	43	40	1	1	1118	364	119	4	124	138	0.24	2.87		18	0	0	0	5	224
rusieam01	1891	1	NY1	NL	33	20	61	57	52	6	1	1501	391	142	7	262	337	0.2	2.55		17	0	1	0	4	244
ryancy01	1891	1	BSN	NL	0	0	1	0	0	0	0	9	2	0	0	1	0	0.18	0		0	0	0	0	1	0
ryanji01	1891	1	CHN	NL	0	0	2	0	0	0	1	17	11	1	0	2	2	0.39	1.59		0	0	1	0	1	7
sandebe01	1891	1	PH4	AA	11	5	19	18	15	0	0	435	157	61	3	37	40		3.79		2	0	0	592	1	85
sayloph01	1891	1	PHI	NL	0	0	1	0	0	0	0	9	2	2	1	0	0	0.18	6		0	0	0	0	1	2
schuljo01	1891	1	PHI	NL	0	1	6	1	0	0	0	45	18	11	1	11	4	0.28	6.6		0	0	0	0	5	15
sewared01	1891	1	CL4	NL	2	1	3	3	0	0	0	49	16	7	0	1	4	0.24	3.86		0	0	0	0	0	10
sharrja01	1891	1	NY1	NL	5	5	10	9	6	0	1	208	47	20	2	35	41	0.18	2.6		5	0	0	0	1	32
shearjo01	1891	1	CL4	NL	1	3	6	5	4	0	0	138	57	18	2	24	19	0.29	3.52		1	0	0	0	1	39
slagljo01	1891	1	CN3	AA	0	0	1	0	0	0	1	4	3	0	0	1	1		0		0	0	0	0	1	0
smithph01	1891	1	PHI	NL	1	1	3	2	0	0	0	57	20	9	1	8	3	0.26	4.26		0	0	0	0	1	15
staleha01	1891	1	PIT	NL	4	5	9	7	6	0	0	215	77	23	4	11	25	0.26	2.89		2	0	0	0	1	49
staleha01	1891	2	BSN	NL	20	8	31	30	26	1	0	757	236	70	11	69	114	0.23	2.5		10	0	0	0	1	111
steined01	1891	1	CHN	NL	7	6	14	10	9	1	0	303	99	42	7	57	38	0.24	3.74		12	0	0	0	3	68
stephcl01	1891	1	CIN	NL	0	1	1	1	1	0	0	24	9	7	1	3	3	0.27	7.88		0	0	0	37	0	9
stiveja01	1891	1	SL4	AA	33	22	64	56	40	3	1	1320	357	140	15	232	259		2.86		25	0	0	1701	8	237
stratsc01	1891	1	PIT	NL	0	2	2	2	2	0	0	55	16	5	0	5	5	0.22	2.45		0	0	0	0	0	9
stratsc01	1891	2	LS2	AA	6	13	20	20	20	1	0	516	204	78	10	34	52		4.08		5	0	0	667	0	112
sulliji01	1891	1	BSN	NL	0	0	1	0	0	0	0	1	2	3	0	5	0	0.66	81		0	0	0	9	0	4
sulliji01	1891	2	CL6	AA	0	1	1	1	1	0	0	27	10	4	1	5	1		4		1	1	1	40	0	9
sullimi02	1891	1	PH4	AA	0	2	2	2	2	0	0	54	17	7	2	10	7		3.5		0	0	0	0	0	13
sullimi02	1891	2	NY1	NL	1	2	3	3	3	0	0	72	24	9	0	8	11	0.25	3.38		5	0	0	0	0	19
tayloja01	1891	1	NY1	NL	0	1	1	1	1	0	0	24	4	1	1	3	3	0.14	1.13		0	0	0	28	0	2
terryad01	1891	1	BRO	NL	6	16	25	22	18	1	1	582	207	91	5	80	65	0.26	4.22		11	0	0	0	3	139
thornjo01	1891	1	PHI	NL	15	16	37	32	23	1	2	807	268	110	3	115	52	0.25	3.68		8	0	1	0	5	161
tucketo01	1891	1	BSN	NL	0	0	1	0	0	0	0	3	3	1	0	0	0	0.5	9		0	0	0	0	1	2
twitcla01	1891	1	CL6	AA	1	1	6	1	1	0	0	93	29	14	1	13	8		4.06		0	0	0	0	5	22
vanhage01	1891	1	BL3	AA	0	1	6	1	0	0	0	69	38	13	1	10	7		5.09		0	0	0	0	5	34
vaughfa01	1891	1	CN3	AA	0	0	1	0	0	0	0	21	12	3	0	1	0		3.86		0	0	0	0	1	9
viaule01	1891	1	CL4	NL	18	17	45	38	31	0	0	1031	367	115	3	138	130	0.26	3.01		21	0	0	0	6	239
vicketo01	1891	1	CHN	NL	6	5	14	12	7	0	0	239	72	36	4	44	39	0.23	4.07		8	0	0	0	3	55
welchmi01	1891	1	NY1	NL	5	9	22	15	14	0	1	480	176	76	7	97	46	0.26	4.28		9	0	0	0	6	136
weyhigu01	1891	1	PH4	AA	31	20	52	51	51	3	0	1350	428	159	12	161	219		3.18		25	0	0	1824	1	231
widnewi01	1891	1	CN3	AA	0	1	1	1	1	0	0	24	13	7	0	4	0		7.88		0	2	0	41	0	7
youngcy01	1891	1	CL4	NL	27	22	55	46	43	0	2	1271	431	134	4	140	147	0.25	2.85		12	11	0	1830	8	244
abbeybe01	1892	1	WAS	NL	5	18	27	23	19	0	1	587	207	75	7	76	77	0.26	3.45		11	0	0	0	3	139
baldwma01	1892	1	PIT	NL	26	27	56	53	45	0	0	1321	447	170	11	194	157	0.25	3.47		17	0	0	0	3	272
breitte01	1892	1	SLN	NL	9	19	39	32	28	1	0	847	280	147	8	148	126	0.24	4.69		7	0	0	0	6	192
buffich01	1892	1	BLN	NL	4	8	13	13	9	0	0	291	130	53	4	46	30	0.3	4.92		9	0	0	0	0	88
campki01	1892	1	PIT	NL	0	1	4	1	1	0	0	69	31	16	4	9	6	0.31	6.26		1	0	0	0	3	23
carseki01	1892	1	PHI	NL	19	16	43	36	30	1	1	953	320	110	6	104	76	0.25	3.12		11	0	0	0	7	166
carutbo01	1892	1	SLN	NL	2	10	16	10	10	0	1	305	131	66	10	27	21	0.3	5.84		2	0	0	0	5	75
chambel01	1892	1	CIN	NL	19	23	52	49	43	2	0	1219	391	153	8	170	169	0.24	3.39		16	0	0	0	3	230
clarkda02	1892	1	BSN	NL	1	0	1	1	1	0	0	21	5	1	0	3	0	0.19	1.29		1	0	0	0	0	1
clarkjo01	1892	1	BSN	NL	8	6	16	16	15	4	0	437	115	38	4	60	48	0.2	2.35		5	0	0	0	0	65
clarkjo01	1892	2	CL4	NL	17	10	29	28	27	1	1	730	235	69	4	72	91	0.24	2.55		4	0	0	0	1	132
clausfr01	1892	1	LS3	NL	9	13	24	24	24	2	0	600	181	68	3	87	94	0.23	3.06		6	0	0	0	0	120
cobbge01	1892	1	BLN	NL	10	37	53	47	42	0	0	1183	495	213	21	140	159	0.29	4.86		15	0	0	0	6	333
craneed01	1892	1	NY1	NL	16	24	47	43	35	2	1	1093	350	154	10	189	174	0.24	3.8		31	0	0	0	4	276
cuppyni01	1892	1	CL4	NL	28	13	47	42	38	1	1	1128	333	105	9	121	103	0.22	2.51		6	0	0	0	5	175
daubda01	1892	1	CIN	NL	1	2	4	3	2	0	0	75	23	8	0	13	7	0.23	2.88		1	0	0	0	1	10
daviege01	1892	1	CL4	NL	10	16	26	26	23	0	0	647	201	62	4	69	95	0.23	2.59		6	0	0	0	0	112
demilha01	1892	1	CHN	NL	1	1	4	2	2	0	0	72	29	17	1	16	15	0.28	6.38		3	0	0	0	2	22
dolanjo01	1892	1	WAS	NL	2	2	5	4	3	0	0	111	39	18	0	15	8	0.26	4.38		1	0	0	0	1	26
duryeje01	1892	1	CIN	NL	2	5	9	7	5	0	0	204	55	27	3	26	21	0.21	3.57		6	0	0	0	2	37
duryeje01	1892	2	WAS	NL	3	11	18	15	13	1	2	381	102	34	6	45	48	0.21	2.41		3	0	0	0	3	59
dwyerfr01	1892	1	SLN	NL	2	8	10	10	6	0	0	192	90	40	1	24	16	0.31	5.63		8	0	0	0	0	58
dwyerfr01	1892	2	CIN	NL	19	10	33	27	24	3	1	778	251	67	6	49	45	0.24	2.33		2	0	0	0	6	101
eastoja01	1892	1	SLN	NL	2	0	5	2	2	0	0	93	38	22	2	26	4	0.29	6.39		5	0	0	0	2	31
ehretre01	1892	1	PIT	NL	16	20	39	36	32	0	0	948	290	93	7	83	101	0.23	2.65		12	0	0	0	3	183
elyha01	1892	1	BLN	NL	0	1	1	1	1	0	0	21	14	6	0	7	0	0.4	7.71		4	2	0	43	0	9
esperdu01	1892	1	PHI	NL	11	6	21	18	14	0	1	481	171	61	2	58	45	0.26	3.42		0	0	0	0	3	84
esperdu01	1892	2	PIT	NL	2	0	3	3	1	0	0	55	18	11	0	12	5	0.24	5.4		2	0	0	0	0	13
fersoal01	1892	1	BLN	NL	0	1	2	1	1	0	0	27	17	11	1	6	8	0.38	11		0	0	0	0	0	13
fitzgwa01	1892	1	LS3	NL	1	3	4	4	4	0	0	102	45	16	2	11	3	0.3	4.24		0	0	0	0	0	27
foremfr01	1892	1	WAS	NL	2	4	11	7	4	0	0	180	53	22	3	37	16	0.22	3.3		1	0	0	0	4	39
foremfr01	1892	2	BLN	NL	0	3	4	3	2	0	0	75	40	19	4	11	5	0.34	6.84		1	0	0	0	1	29
foutzda01	1892	1	BRO	NL	13	8	27	20	17	0	1	609	210	77	3	63	56	0.25	3.41		5	0	0	0	7	119
galvipu01	1892	1	PIT	NL	5	6	12	12	10	0	0	288	104	28	0	28	29	0.26	2.63		3	3	0	411	0	51
galvipu01	1892	2	SLN	NL	5	6	12	12	10	0	0	276	102	33	4	26	27	0.27	3.23		1	0	0	414	0	47
gastrha01	1892	1	WAS	NL	3	3	11	7	6	0	0	239	94	45	3	38	32	0.28	5.08		5	0	0	0	4	54
getzich01	1892	1	SLN	NL	5	8	13	13	12	0	0	324	159	68	5	31	32	0.32	5.67		4	0	0	0	0	87
gilbebi01	1892	1	BLN	NL	0	1	2	1	1	0	0	42	14	9	1	17	5	0.25	5.79		1	0	0	0	1	15
gleaski01	1892	1	SLN	NL	20	24	47	45	43	2	0	1200	389	148	11	151	133	0.24	3.33		9	0	0	0	0	244
grifffr01	1892	1	CHN	NL	0	1	1	1	0	0	0	12	3	5	1	6	3	0.2	11.25		2	0	0	0	0	5
gumbead01	1892	1	CHN	NL	22	19	46	45	39	0	0	1148	399	145	11	107	118	0.25	3.41		11	0	0	0	1	220
gumbebi01	1892	1	PIT	NL	3	2	6	3	2	0	0	119	30	6	0	23	3	0.2	1.36		0	0	0	0	3	15
haddoge01	1892	1	BRO	NL	29	13	46	44	39	3	1	1144	340	133	11	163	153	0.22	3.14		21	0	0	0	2	190
hartbi01	1892	1	BRO	NL	9	12	28	23	16	2	1	585	188	71	3	96	65	0.24	3.28		4	0	0	0	5	109
hawkebi01	1892	1	SLN	NL	5	5	14	11	10	1	0	292	108	40	2	45	55	0.27	3.7		5	0	0	0	3	59
hawlepi01	1892	1	SLN	NL	6	14	20	20	18	0	0	499	160	59	4	63	63	0.24	3.19		8	0	0	0	0	116
healyjo01	1892	1	BLN	NL	3	6	9	8	5	0	0	205	82	36	4	21	24	0.28	4.74		2	0	0	0	1	51
healyjo01	1892	2	LS3	NL	1	1	2	2	2	0	0	55	15	4	0	5	4	0.21	1.96		0	0	0	0	0	7
hemmige01	1892	1	CIN	NL	0	1	1	0	0	0	0	18	10	5	1	2	0	0.35	7.5		0	0	0	0	1	6
hemmige01	1892	2	LS3	NL	2	2	4	4	4	0	0	105	36	18	1	17	12	0.25	4.63		0	0	0	0	0	25
hollibu01	1892	1	CIN	NL	0	0	1	0	0	0	0	12	13	5	0	1	0	0.52	11.25		0	0	0	0	1	5
hollijo01	1892	1	CHN	NL	0	0	1	0	0	0	0	12	1	1	1	0	2	0.07	2.25		0	0	0	0	1	1
hutchbi01	1892	1	CHN	NL	36	36	75	70	67	5	1	1866	571	191	11	190	314	0.23	2.76		20	0	0	0	5	316
inksbe01	1892	1	BRO	NL	4	2	9	8	4	1	0	174	48	25	0	33	25	0.21	3.88		4	0	0	0	1	34
inksbe01	1892	2	WAS	NL	1	2	3	3	3	0	0	63	29	12	0	10	11	0.31	5.14		2	0	0	0	0	27
jonesal01	1892	1	LS3	NL	5	11	18	16	13	1	0	440	130	54	3	56	44	0.22	3.31		3	0	0	0	2	90
jonesal01	1892	2	WAS	NL	0	3	4	4	3	0	0	81	33	12	0	14	7	0.29	4		2	0	0	0	0	23
jonesbu01	1892	1	CIN	NL	1	0	1	1	1	0	0	27	0	0	0	4	3	0	0		0	0	0	0	0	1
keefeti01	1892	1	PHI	NL	19	16	39	38	31	2	0	940	264	82	4	100	127	0.21	2.36		9	13	0	1314	1	142
kellyki01	1892	1	BSN	NL	0	0	1	0	0	0	0	18	8	1	0	4	0	0.3	1.5		0	0	0	0	1	4
kennebr01	1892	1	BRO	NL	13	8	26	21	18	0	1	573	189	82	3	95	108	0.24	3.86		11	0	0	0	5	115
killefr01	1892	1	WAS	NL	29	26	60	52	46	2	0	1379	448	169	15	182	147	0.24	3.31		18	0	0	0	7	286
kilroma01	1892	1	WAS	NL	1	1	4	3	2	0	0	79	20	7	0	15	1	0.2	2.39		1	0	0	0	1	11
kingsi01	1892	1	NY1	NL	23	24	52	47	46	1	0	1258	397	151	15	174	177	0.24	3.24		21	0	0	0	5	252
klingbi01	1892	1	BLN	NL	0	2	2	2	0	0	0	33	17	14	1	7	7	0.34	11.45		2	0	0	0	0	16
knausfr01	1892	1	CIN	NL	0	0	1	0	0	0	0	24	13	3	0	5	2	0.35	3.38		0	0	0	0	1	9
knellph01	1892	1	WAS	NL	9	13	22	21	17	1	0	510	156	69	4	76	74	0.23	3.65		11	0	0	0	1	114
knellph01	1892	2	PHI	NL	5	5	11	9	7	0	0	240	87	36	0	35	43	0.26	4.05		7	0	0	0	2	47
lubypa01	1892	1	CHN	NL	11	16	31	27	24	1	0	757	248	86	10	103	66	0.25	3.07		4	0	0	0	4	157
mcgilwi01	1892	1	CIN	NL	1	1	3	3	1	0	0	51	18	10	0	5	7	0.26	5.29		1	0	0	0	0	14
mcmahsa01	1892	1	BLN	NL	19	25	48	46	44	2	1	1191	430	143	9	145	118	0.26	3.24		10	0	0	0	2	260
meakige01	1892	1	CHN	NL	0	1	1	1	1	0	0	27	18	11	0	2	0	0.4	11		0	0	0	0	0	14
meakige01	1892	2	CIN	NL	1	1	3	3	1	0	0	41	19	13	1	9	4	0.31	8.56		1	0	0	0	0	18
meekijo01	1892	1	LS3	NL	7	10	19	18	17	0	0	469	168	70	3	78	67	0.26	4.03		7	0	0	0	1	108
meekijo01	1892	2	WAS	NL	3	10	14	14	13	1	0	336	112	43	2	48	58	0.25	3.46		6	0	0	0	0	91
menefjo01	1892	1	PIT	NL	0	0	1	0	0	0	0	12	10	5	0	2	0	0.45	11.25		0	0	0	0	1	6
mullato01	1892	1	CIN	NL	21	13	37	34	30	3	1	885	222	85	12	127	109	0.2	2.59		16	0	0	0	3	131
nichoki01	1892	1	BSN	NL	35	16	53	51	49	5	0	1359	404	143	15	121	187	0.22	2.84		24	10	0	1877	1	211
pfefffr01	1892	1	LS3	NL	0	0	1	0	0	0	0	15	4	1	0	5	0	0.21	1.8		0	0	0	0	1	3
rettgge01	1892	1	CL4	NL	1	3	6	5	3	0	0	114	32	18	2	31	12	0.21	4.26		5	0	0	0	1	27
rettgge01	1892	2	CIN	NL	1	0	1	1	1	0	0	27	8	4	0	10	1	0.22	4		0	0	0	0	0	5
rhinebi01	1892	1	CIN	NL	4	7	12	10	7	0	0	251	113	47	0	36	12	0.31	5.06		2	0	0	0	2	71
rusieam01	1892	1	NY1	NL	31	31	64	61	58	2	0	1596	405	170	7	267	288	0.2	2.88		24	0	0	0	3	288
sandebe01	1892	1	LS3	NL	12	19	31	31	30	3	0	805	281	96	6	62	77	0.25	3.22		5	0	0	0	0	150
schmicr01	1892	1	BLN	NL	1	4	6	6	6	0	0	142	37	17	0	26	17	0.2	3.23		2	0	0	0	0	26
sharrja01	1892	1	NY1	NL	0	0	1	0	0	0	0	6	2	1	0	1	1	0.25	4.5		2	0	0	0	1	1
smithel01	1892	1	PIT	NL	6	7	17	13	12	1	0	402	140	54	2	58	51	0.25	3.63		3	0	0	0	4	94
staleha01	1892	1	BSN	NL	22	10	37	35	31	3	0	899	273	101	10	97	93	0.23	3.03		7	0	0	0	2	144
steined01	1892	1	BRO	NL	27	16	48	42	38	6	1	1132	310	119	6	150	190	0.21	2.84		14	0	1	0	6	166
stephbe01	1892	1	BLN	NL	1	1	5	2	2	0	1	87	37	9	2	9	7	0.29	2.79		1	0	0	0	3	22
stephbe01	1892	2	CIN	NL	0	1	1	1	0	0	0	21	12	1	0	4	1	0.36	1.29		0	0	0	0	0	3
stiveja01	1892	1	BSN	NL	35	16	54	48	45	3	1	1247	346	140	12	171	180	0.21	3.03		15	0	0	0	6	223
stratsc01	1892	1	LS3	NL	21	19	42	40	39	2	0	1055	342	114	1	70	93	0.24	2.92		6	0	0	0	2	188
sullimi02	1892	1	CIN	NL	12	4	21	16	15	0	0	499	179	57	8	74	56	0.26	3.08		10	0	0	0	5	90
tayloja01	1892	1	PHI	NL	1	0	3	3	2	0	0	78	28	4	2	10	7	0.26	1.38		0	0	0	0	0	19
terryad01	1892	1	BLN	NL	0	1	1	1	1	0	0	27	7	4	0	7	3	0.2	4		0	0	0	0	0	7
terryad01	1892	2	PIT	NL	18	7	30	26	24	2	1	720	185	67	3	106	95	0.2	2.51		8	0	0	0	4	106
thompwi01	1892	1	PIT	NL	0	1	1	1	0	0	0	9	3	1	0	5	0	0.25	3		0	0	0	0	0	5
thornjo01	1892	1	PHI	NL	0	2	3	2	1	0	0	36	16	17	1	17	2	0.3	12.75		2	0	0	0	1	19
vanhage01	1892	1	BLN	NL	0	0	4	0	0	0	0	44	28	15	1	7	5	0.38	9.2		0	0	0	0	4	17
viaule01	1892	1	CL4	NL	0	1	1	1	0	0	0	3	5	4	0	1	0	0.62	36		0	0	0	0	0	5
viaule01	1892	2	LS3	NL	4	11	16	15	14	1	0	392	156	58	7	56	36	0.28	3.99		4	0	0	0	1	86
viaule01	1892	3	BSN	NL	1	0	1	1	1	0	0	27	5	0	0	4	1	0.15	0		0	0	0	0	0	1
vicketo01	1892	1	BLN	NL	8	10	24	21	17	0	0	528	189	69	3	87	49	0.26	3.53		9	0	0	0	3	134
welchmi01	1892	1	NY1	NL	0	0	1	1	0	0	0	15	11	8	0	4	1	0.42	14.4		0	0	0	0	0	9
weyhigu01	1892	1	PHI	NL	32	21	59	49	46	6	3	1409	411	139	9	168	202	0.22	2.66		12	0	0	0	10	213
willito01	1892	1	CL4	NL	1	0	2	1	1	0	0	27	9	3	1	1	3	0.25	3		1	0	0	0	1	4
woodcfr01	1892	1	PIT	NL	1	2	5	4	3	0	0	99	42	13	1	17	8	0.29	3.55		0	0	0	0	1	28
youngcy01	1892	1	CL4	NL	36	12	53	49	48	9	0	1359	363	97	8	118	168	0.21	1.93		13	8	0	1826	4	158
youngjb01	1892	1	SLN	NL	0	0	1	0	0	0	0	6	9	5	0	2	1	0.6	22.5		0	0	0	0	0	13
abbeybe01	1893	1	CHN	NL	2	4	7	7	5	0	0	168	74	34	1	20	6	0.3	5.46		2	0	0	0	0	52
bakerki01	1893	1	BLN	NL	3	8	15	12	8	0	0	275	138	86	5	58	26	0.33	8.44		6	0	0	0	3	111
baldwma01	1893	1	PIT	NL	0	0	1	1	0	0	0	7	6	3	0	1	0	0.46	11.57		0	0	0	0	0	4
baldwma01	1893	2	NY1	NL	16	20	45	39	33	2	2	994	335	151	6	141	100	0.25	4.1		13	0	0	0	6	228
bannoji01	1893	1	SLN	NL	0	1	1	1	0	0	0	12	10	10	1	5	1	0.45	22.5		0	0	0	0	0	18
breitte01	1893	1	SLN	NL	19	24	48	42	38	1	1	1148	359	135	8	156	102	0.24	3.18		9	0	0	0	5	197
brownst01	1893	1	BLN	NL	0	0	2	0	0	0	0	27	13	6	0	5	0	0.32	6		1	0	0	0	2	8
carseki01	1893	1	PHI	NL	20	15	39	35	30	1	0	955	375	170	7	124	50	0.28	4.81		9	0	0	0	4	229
chambel01	1893	1	CIN	NL	16	12	34	27	19	1	0	723	248	100	3	112	59	0.25	3.73		15	0	0	0	7	148
clarkda02	1893	1	SLN	NL	12	9	24	21	17	1	0	559	194	72	4	79	37	0.26	3.48		10	0	0	0	3	116
clarkjo01	1893	1	CL4	NL	16	17	36	35	31	0	0	885	358	146	11	95	62	0.29	4.45		15	0	0	0	1	240
clausfr01	1893	1	LS3	NL	1	4	5	5	3	0	0	99	41	22	2	22	4	0.29	6		3	0	0	0	0	25
clausfr01	1893	2	CHN	NL	6	2	10	9	8	0	1	228	71	26	1	39	31	0.24	3.08		6	0	0	0	1	46
colcoto01	1893	1	PIT	NL	1	0	8	3	1	0	2	131	45	20	1	32	7	0.25	4.12		1	0	0	0	5	30
coylebi01	1893	1	BSN	NL	0	1	2	1	0	0	0	24	14	8	1	3	2	0.37	9		0	0	0	0	1	10
craneed01	1893	1	NY1	NL	2	4	10	7	4	0	0	205	84	45	2	41	11	0.29	5.93		3	0	0	0	3	62
craneed01	1893	2	BRO	NL	0	2	2	2	1	0	0	30	19	15	2	9	5	0.39	13.5		1	0	0	0	0	19
crossle01	1893	1	CIN	NL	0	2	3	3	2	0	0	63	24	13	3	9	7	0.27	5.57		2	0	0	0	0	16
cuppyni01	1893	1	CL4	NL	17	10	31	30	24	0	0	731	316	121	6	75	39	0.3	4.47		2	0	0	0	1	200
darbyge01	1893	1	CIN	NL	1	1	4	3	2	0	0	87	41	25	2	18	6	0.32	7.76		1	0	0	0	1	32
daubda01	1893	1	BRO	NL	6	6	12	12	12	0	0	309	104	44	3	61	25	0.25	3.84		6	0	0	0	0	64
daviege01	1893	1	CL4	NL	0	2	3	3	1	0	0	45	28	19	1	10	3	0.38	11.4		5	0	0	0	0	25
daviege01	1893	2	NY1	NL	1	1	5	1	1	0	0	109	41	25	1	13	7	0.27	6.19		1	0	0	0	4	31
dolanjo01	1893	1	SLN	NL	0	1	3	1	1	0	1	52	26	8	1	7	1	0.33	4.15		0	0	0	0	2	22
donahre01	1893	1	NY1	NL	0	0	2	0	0	0	1	15	8	5	1	3	1	0.35	9		0	0	0	0	1	10
donnefr01	1893	1	CHN	NL	3	1	7	5	3	0	2	126	51	25	1	17	6	0.29	5.36		2	0	0	0	2	42
duryeje01	1893	1	WAS	NL	4	10	17	15	9	0	0	351	182	98	8	56	20	0.34	7.54		7	0	0	0	2	137
dwyerfr01	1893	1	CIN	NL	18	15	37	30	28	1	2	862	332	132	17	93	53	0.28	4.13		5	0	0	0	7	187
ehretre01	1893	1	PIT	NL	18	18	39	35	32	4	0	943	322	120	3	115	70	0.25	3.44		10	0	0	0	4	203
esperdu01	1893	1	WAS	NL	12	28	42	36	34	0	0	1003	442	175	14	156	78	0.3	4.71		6	0	0	0	6	277
fishech04	1893	1	CL4	NL	0	2	2	2	2	0	0	54	26	11	0	9	9	0.32	5.5		1	0	0	0	0	18
foremfr01	1893	1	NY1	NL	0	1	2	1	0	0	0	17	19	17	1	10	0	0.53	27		0	0	0	0	1	17
foutzda01	1893	1	BRO	NL	0	0	6	0	0	0	0	54	28	15	2	8	3	0.34	7.5		0	0	0	0	6	17
garryji01	1893	1	BSN	NL	0	1	1	0	0	0	0	3	5	7	0	4	2	0.62	63		0	0	0	0	0	8
gastrha01	1893	1	PIT	NL	3	1	9	5	3	0	0	177	74	41	3	39	12	0.29	6.25		2	0	0	0	4	54
gastrha01	1893	2	BSN	NL	12	4	19	18	16	0	0	468	179	89	9	76	27	0.27	5.13		7	0	0	0	1	117
germale01	1893	1	NY1	NL	8	8	20	18	14	0	0	456	162	70	6	70	35	0.26	4.14		6	0	0	0	2	109
gleaski01	1893	1	SLN	NL	21	22	48	45	37	1	1	1141	436	195	18	187	86	0.27	4.61		16	0	0	0	3	276
graffjo01	1893	1	WAS	NL	0	1	2	1	1	0	0	36	21	15	2	13	4	0.37	11.25		0	0	0	0	1	21
griffcl01	1893	1	CHN	NL	1	2	4	2	2	0	0	59	24	11	1	5	9	0.29	5.03		0	0	0	0	2	14
gumbead01	1893	1	PIT	NL	11	7	22	20	16	2	0	488	207	93	5	78	40	0.3	5.15		3	0	0	0	2	119
gumbebi01	1893	1	LS3	NL	0	0	1	1	0	0	0	2	2	2	0	5	0	0.5	27		0	0	0	0	0	6
haddoge01	1893	1	BRO	NL	8	9	23	20	12	0	0	453	193	94	10	89	37	0.3	5.6		7	0	0	0	3	145
hastich01	1893	1	CL4	NL	4	5	15	9	6	0	1	276	128	48	5	33	14	0.32	4.7		8	0	0	0	5	81
hawkebi01	1893	1	SLN	NL	0	1	1	1	0	0	0	16	9	3	0	3	1	0.36	5.06		0	0	0	0	0	9
hawkebi01	1893	2	BLN	NL	11	16	29	29	22	1	0	675	248	119	8	108	69	0.27	4.76		12	0	0	0	0	175
hawlepi01	1893	1	SLN	NL	5	17	31	24	21	0	1	681	249	116	6	103	73	0.27	4.6		9	0	0	0	7	184
hemmige01	1893	1	LS3	NL	18	17	41	32	32	1	1	996	369	188	7	176	79	0.27	5.1		9	0	0	0	8	248
hugheji01	1893	1	CHN	NL	0	1	2	2	1	0	0	27	14	11	0	3	4	0.34	11		0	0	0	0	0	16
hutchbi01	1893	1	CHN	NL	16	24	44	40	38	2	0	1045	420	184	9	156	80	0.28	4.75		12	0	0	0	3	266
johnsab01	1893	1	CHN	NL	0	0	1	0	0	0	1	3	2	4	0	2	0	0.4	36		0	0	0	0	1	4
jonesbu01	1893	1	CIN	NL	1	3	6	5	2	0	0	86	37	32	1	23	6	0.3	10.05		2	0	0	0	1	37
jonesbu01	1893	2	NY1	NL	0	1	1	1	0	0	0	12	5	5	0	10	1	0.29	11.25		1	0	0	0	0	5
keefeti01	1893	1	PHI	NL	10	7	22	22	17	0	0	534	202	87	3	79	53	0.27	4.4		5	12	0	785	0	131
kennebr01	1893	1	BRO	NL	25	20	46	44	40	2	1	1148	376	158	15	168	107	0.24	3.72		12	0	0	0	2	238
killefr01	1893	1	PIT	NL	36	14	55	48	38	2	0	1245	401	168	12	140	99	0.24	3.64		10	0	1	0	6	235
kilroma01	1893	1	LS3	NL	3	2	5	5	5	1	0	105	57	35	2	23	4	0.35	9		2	0	0	0	0	41
kingsi01	1893	1	NY1	NL	3	4	7	7	4	0	0	147	69	47	4	26	13	0.32	8.63		5	0	0	0	0	58
kingsi01	1893	2	CIN	NL	5	6	17	15	8	1	1	315	119	57	2	56	30	0.27	4.89		0	0	0	0	2	69
lovetto01	1893	1	BRO	NL	3	5	14	8	6	0	1	288	134	70	2	35	15	0.32	6.56		1	0	0	0	5	92
lucidco01	1893	1	LS3	NL	0	1	2	1	0	0	0	18	10	10	0	10	0	0.36	15		1	0	0	0	1	14
mauckha01	1893	1	CHN	NL	8	10	23	18	12	1	0	429	168	70	2	60	23	0.28	4.41		9	0	0	0	4	112
maulal01	1893	1	WAS	NL	12	21	37	33	29	1	0	891	355	175	17	144	72	0.28	5.3		11	0	3	0	4	254
mcgilwi01	1893	1	CHN	NL	17	18	39	34	26	1	0	908	311	155	6	181	91	0.25	4.61		5	0	0	0	5	206
mcgingu01	1893	1	CHN	NL	2	5	13	5	3	0	0	202	85	40	2	31	13	0.29	5.35		4	0	0	0	6	67
mcgingu01	1893	2	PHI	NL	1	3	5	4	4	1	0	112	39	18	0	17	12	0.26	4.34		1	0	0	0	1	20
mcmahsa01	1893	1	BLN	NL	23	18	43	40	35	0	1	1039	378	168	6	156	79	0.26	4.37		17	0	0	0	3	232
mcnabed01	1893	1	BLN	NL	8	7	21	14	12	0	0	426	167	65	5	53	18	0.28	4.12		3	0	0	0	7	109
meekijo01	1893	1	WAS	NL	10	15	31	28	24	1	0	735	289	135	6	140	91	0.28	4.96		11	0	0	0	3	201
menefjo01	1893	1	LS3	NL	8	7	15	15	14	1	0	388	150	61	3	40	30	0.28	4.24		5	0	0	0	0	95
mullato01	1893	1	CIN	NL	6	6	15	13	11	0	1	367	130	60	4	65	24	0.26	4.41		8	0	0	0	2	84
mullato01	1893	2	BLN	NL	12	16	34	26	23	0	1	734	277	121	4	124	71	0.27	4.45		21	0	1	0	8	177
nichoki01	1893	1	BSN	NL	34	14	52	44	43	1	1	1275	426	166	15	118	94	0.25	3.52		5	16	1	1774	7	222
oconnfr01	1893	1	PHI	NL	0	0	3	1	0	0	1	12	2	5	0	9	0	0.14	11.25		2	0	0	0	1	5
parkedo01	1893	1	CHN	NL	0	0	1	0	0	0	1	6	5	3	0	1	0	0.45	13.5		0	0	0	0	1	3
parroto01	1893	1	CHN	NL	0	3	4	3	2	0	0	81	35	20	1	17	7	0.3	6.67		0	0	0	0	1	30
parroto01	1893	2	CIN	NL	10	7	22	17	11	1	0	462	174	70	1	70	33	0.27	4.09		7	0	0	0	5	95
pearsfr01	1893	1	SLN	NL	0	0	1	0	0	0	0	12	9	6	0	2	0	0.43	13.5		1	0	0	0	1	7
pettych01	1893	1	NY1	NL	5	2	9	6	4	0	0	162	66	20	0	28	12	0.29	3.33		4	0	0	0	3	36
quarlbi01	1893	1	BSN	NL	2	1	3	3	3	0	0	81	31	14	2	5	6	0.28	4.67		2	0	0	0	0	20
radfopa01	1893	1	WAS	NL	0	0	1	0	0	0	0	3	2	2	2	2	1	0.4	18		0	0	0	0	1	2
rhinebi01	1893	1	LS3	NL	1	4	5	5	3	0	0	93	49	30	3	19	0	0.34	8.71		0	0	0	0	0	37
rhodebi01	1893	1	LS3	NL	5	12	20	19	17	0	0	455	244	128	10	66	22	0.35	7.6		1	0	0	0	1	173
rusieam01	1893	1	NY1	NL	33	21	56	52	50	4	1	1446	451	173	15	218	208	0.24	3.23		26	0	0	0	4	260
ryanji01	1893	1	CHN	NL	0	0	1	0	0	0	0	14	3	0	0	0	1	0.17	0		0	0	0	0	1	0
scheija01	1893	1	CL4	NL	1	1	2	2	2	1	0	54	15	4	0	11	1	0.22	2		1	0	0	76	0	9
schmicr01	1893	1	BLN	NL	3	2	9	6	4	0	0	147	67	36	1	22	10	0.31	6.61		3	0	0	0	3	51
schmicr01	1893	2	NY1	NL	0	2	4	4	1	0	0	62	30	17	0	17	5	0.32	7.4		1	0	0	0	0	25
sharrge01	1893	1	BRO	NL	4	6	13	10	10	0	1	285	114	62	3	58	24	0.28	5.87		8	0	0	0	3	80
sharrja01	1893	1	PHI	NL	4	2	12	4	2	0	0	168	53	28	1	33	11	0.24	4.5		1	0	0	0	7	43
shawsa01	1893	1	CHN	NL	1	0	2	2	1	0	0	48	12	10	2	13	1	0.2	5.63		0	0	0	0	0	12
sigsbse01	1893	1	NY1	NL	0	0	1	0	0	0	0	9	1	3	0	4	2	0.1	9		0	0	0	0	1	4
staffjo01	1893	1	CL4	NL	0	1	2	0	0	0	0	21	12	11	1	7	4	0.36	14.14		0	0	0	0	1	15
staleha01	1893	1	BSN	NL	18	10	36	31	23	0	0	789	344	150	22	81	61	0.3	5.13		10	0	0	0	4	224
steined01	1893	1	BRO	NL	19	15	37	34	28	1	0	895	294	125	4	119	81	0.25	3.77		17	0	0	0	2	190
stephbe01	1893	1	WAS	NL	0	6	9	6	6	0	0	191	83	41	1	31	14	0.3	5.8		2	0	0	0	3	58
stiveja01	1893	1	BSN	NL	20	12	38	34	29	1	1	851	315	139	17	115	61	0.27	4.41		6	0	0	0	4	194
stockot01	1893	1	WAS	NL	2	8	11	11	7	0	0	207	111	63	4	32	12	0.35	8.22		2	0	0	0	0	82
stratsc01	1893	1	LS3	NL	12	23	37	35	34	1	0	944	445	190	8	100	43	0.32	5.43		7	0	0	0	2	259
sullimi02	1893	1	CIN	NL	8	11	27	18	14	0	1	551	200	103	5	103	40	0.26	5.05		6	0	0	0	9	146
tayloja01	1893	1	PHI	NL	10	9	25	16	14	0	1	510	189	80	8	77	41	0.27	4.24		2	0	0	0	9	113
terryad01	1893	1	PIT	NL	12	8	26	19	14	0	0	510	177	84	5	99	52	0.26	4.45		6	0	0	0	6	121
vicketo01	1893	1	PHI	NL	4	5	13	11	7	0	0	240	100	48	1	37	15	0.29	5.4		3	0	0	0	2	65
virtuja01	1893	1	CL4	NL	0	0	1	0	0	0	0	15	3	1	0	3	2	0.16	1.8		0	0	0	0	1	3
wadswja01	1893	1	BLN	NL	0	3	3	3	0	0	0	48	37	20	0	8	2	0.43	11.25		4	0	0	0	0	30
weyhigu01	1893	1	PHI	NL	23	16	42	40	33	2	0	1036	399	182	10	145	101	0.28	4.74		11	0	0	0	2	235
whitrbi01	1893	1	LS3	NL	2	5	8	8	5	0	0	140	64	42	3	18	8	0.31	8.1		1	0	0	0	0	44
willito01	1893	1	CL4	NL	1	1	5	2	2	0	0	72	33	13	1	10	6	0.31	4.88		2	0	0	0	3	18
yostgu01	1893	1	CHN	NL	0	1	1	1	0	0	0	8	3	4	0	8	1	0.27	13.5		1	0	0	17	0	4
youngcy01	1893	1	CL4	NL	34	16	53	46	42	1	1	1268	442	158	10	103	102	0.26	3.36		14	10	0	1774	7	230
abbeybe01	1894	1	CHN	NL	2	7	11	11	10	0	0	276	119	53	3	37	24	0.31	5.18		0	0	0	0	0	74
anderva01	1894	1	WAS	NL	0	2	2	2	2	0	0	42	15	11	0	6	3	0.27	7.07		0	0	0	0	0	12
bakerki01	1894	1	BLN	NL	0	1	1	0	0	0	0	0	1	0	0	2	0	1			0	0	0	0	0	5
bannoji01	1894	1	BSN	NL	0	0	1	0	0	0	0	6	4	0	1	1	0	0.41	0		1	0	0	0	1	3
blankfr01	1894	1	CIN	NL	0	1	1	1	1	0	0	24	5	4	0	9	1	0.17	4.5		0	0	0	0	0	4
boydja01	1894	1	WAS	NL	0	3	3	3	3	0	0	57	37	18	1	14	3	0.4	8.53		2	0	0	0	0	35
breitte01	1894	1	SLN	NL	27	23	56	50	46	1	0	1342	497	238	21	191	140	0.27	4.79		5	0	0	0	5	321
brownst01	1894	1	BLN	NL	4	0	9	6	3	0	0	149	59	27	3	24	8	0.29	4.89		2	0	0	0	2	39
burkeje01	1894	1	CL4	NL	0	0	1	0	0	0	0	12	6	2	0	1	0	0.34	4.5		0	0	0	0	1	2
burrial01	1894	1	PHI	NL	0	0	1	0	0	0	0	15	14	10	0	2	0	0.49	18		0	0	0	0	1	10
callani01	1894	1	PHI	NL	1	2	9	2	1	0	2	101	64	37	3	17	9	0.39	9.89		1	0	0	0	4	52
campki01	1894	1	CHN	NL	0	1	3	2	2	0	0	66	34	16	0	12	6	0.34	6.55		3	0	0	0	1	24
carseki01	1894	1	PHI	NL	18	12	35	31	26	0	0	831	349	171	22	102	41	0.3	5.56		15	0	0	0	3	229
chambel01	1894	1	CIN	NL	10	9	23	22	18	1	0	533	220	114	10	91	57	0.3	5.77		11	0	0	0	1	155
clarkda01	1894	1	NY1	NL	3	4	15	6	5	0	1	252	114	46	3	26	15	0.32	4.93		3	0	0	0	9	76
clarkda02	1894	1	SLN	NL	8	17	32	32	24	1	0	700	318	165	9	117	46	0.32	6.36		11	0	0	0	0	236
clarkjo01	1894	1	CL4	NL	8	10	22	18	13	1	0	452	173	74	6	46	28	0.28	4.42		8	0	0	0	3	109
clausfr01	1894	1	CHN	NL	0	1	1	1	0	0	0	13	5	5	0	3	1	0.28	10.38		0	0	0	0	0	5
colcoto01	1894	1	PIT	NL	8	5	22	14	11	0	0	446	207	117	5	70	29	0.32	7.08		7	0	0	0	8	143
crossle01	1894	1	CIN	NL	3	4	8	7	3	0	0	159	94	50	8	21	11	0.38	8.49		0	0	0	0	1	73
cuppyni01	1894	1	CL4	NL	24	15	43	33	29	3	0	948	381	160	11	128	65	0.29	4.56		8	0	0	0	10	246
daubda01	1894	1	BRO	NL	10	12	34	27	15	0	0	672	291	152	7	91	45	0.31	6.11		17	0	0	0	7	206
dwyerfr01	1894	1	CIN	NL	19	22	45	40	34	1	1	1044	471	196	27	106	49	0.32	5.07		9	0	0	0	5	282
eastoja01	1894	1	PIT	NL	0	1	3	1	1	0	0	59	26	9	0	4	1	0.31	4.12		1	0	0	0	2	16
eganri01	1894	1	WAS	NL	0	0	1	0	0	0	0	15	8	6	1	2	2	0.35	10.8		0	0	0	0	1	6
ehretre01	1894	1	PIT	NL	19	21	46	38	31	1	0	1040	441	198	12	128	102	0.3	5.14		5	0	0	0	8	269
elybo01	1894	1	SLN	NL	0	0	1	0	0	0	0	3	0	0	0	3	0	0	0		1	0	0	0	1	0
esperdu01	1894	1	WAS	NL	5	10	18	14	7	0	0	348	177	96	8	39	24	0.34	7.45		0	0	0	0	3	139
esperdu01	1894	2	BLN	NL	10	2	16	9	8	0	2	303	107	44	1	36	25	0.26	3.92		1	0	0	0	7	56
fannija01	1894	1	PHI	NL	1	3	5	4	2	0	0	97	45	29	4	20	7	0.32	8.07		1	0	0	0	1	43
figgefr01	1894	1	PHI	NL	0	1	1	1	1	0	0	24	12	10	1	4	2	0.34	11.25		0	0	0	0	0	14
fishech04	1894	1	CL4	NL	0	2	3	2	0	0	0	33	22	14	0	5	0	0.41	11.45		1	0	0	0	1	17
fishech04	1894	2	CIN	NL	2	8	11	11	10	0	0	273	134	74	4	44	14	0.33	7.32		3	0	0	0	0	109
flynnca01	1894	1	CIN	NL	0	2	2	1	0	0	0	23	16	15	4	10	4	0.42	17.61		0	0	0	0	1	15
fournhe01	1894	1	CIN	NL	1	3	6	4	4	0	0	135	71	27	4	20	5	0.35	5.4		1	0	0	0	2	51
foutzda01	1894	1	BRO	NL	0	0	1	0	0	0	0	6	4	3	0	1	0	0.41	13.5		1	0	0	0	1	3
frankch01	1894	1	SLN	NL	0	0	2	0	0	0	0	9	6	5	1	7	1	0.41	15		0	0	0	0	2	5
gastrha01	1894	1	BRO	NL	2	6	16	8	6	1	2	279	135	66	1	55	20	0.33	6.39		2	0	0	0	7	85
germale01	1894	1	NY1	NL	9	8	23	15	10	0	1	402	178	86	7	66	17	0.31	5.78		4	0	0	0	5	133
gleaski01	1894	1	SLN	NL	2	6	8	8	6	0	0	174	75	39	2	21	9	0.31	6.05		1	0	0	0	0	50
gleaski01	1894	2	BLN	NL	15	5	21	20	19	0	0	516	224	85	3	44	35	0.31	4.45		3	0	0	0	1	111
griffcl01	1894	1	CHN	NL	21	14	36	30	28	0	0	784	328	143	12	85	71	0.3	4.92		5	0	0	0	6	193
grifffr01	1894	1	CL4	NL	1	2	7	6	3	0	0	127	64	47	5	37	15	0.34	9.99		4	0	0	0	0	62
gumbead01	1894	1	PIT	NL	15	14	37	31	26	0	0	807	372	180	13	84	65	0.32	6.02		2	0	0	0	5	241
haddoge01	1894	1	PHI	NL	4	3	10	7	5	0	0	168	63	36	0	34	7	0.28	5.79		2	0	0	0	3	46
haddoge01	1894	2	WAS	NL	0	4	4	4	4	0	0	87	50	28	2	17	1	0.37	8.69		5	0	0	0	0	40
harpege01	1894	1	PHI	NL	6	6	12	9	7	0	0	259	128	51	3	49	24	0.34	5.32		5	0	0	0	3	84
hawkebi01	1894	1	BLN	NL	16	9	32	25	17	0	3	618	264	133	9	78	68	0.3	5.81		2	0	0	0	7	174
hawlepi01	1894	1	SLN	NL	19	27	53	41	36	0	0	1178	481	214	14	149	120	0.29	4.9		21	0	0	0	10	306
hawlesc01	1894	1	BSN	NL	0	1	1	1	1	0	0	21	10	6	0	7	1	0.33	7.71		1	0	0	0	0	6
hemmige01	1894	1	LS3	NL	13	19	35	32	32	1	1	883	358	143	7	133	66	0.29	4.37		5	0	0	0	3	213
hemmige01	1894	2	BLN	NL	4	0	6	6	4	0	0	136	48	18	0	26	4	0.26	3.57		1	0	0	0	0	22
hodsoge01	1894	1	BSN	NL	4	4	12	11	8	0	0	222	103	48	4	35	12	0.32	5.84		5	0	0	0	1	66
horneja01	1894	1	BLN	NL	0	1	2	1	1	0	1	33	15	11	0	7	2	0.32	9		3	0	0	0	1	12
hutchbi01	1894	1	CHN	NL	14	16	36	34	28	0	0	833	373	187	9	140	59	0.31	6.06		6	0	0	0	2	257
inksbe01	1894	1	BLN	NL	9	4	22	14	10	0	1	399	181	82	4	54	30	0.32	5.55		4	0	0	0	8	108
inksbe01	1894	2	LS3	NL	2	6	8	8	8	0	0	179	87	43	2	34	8	0.33	6.49		0	0	0	0	0	70
johnsjo01	1894	1	PHI	NL	1	1	4	3	2	0	0	98	44	22	3	15	10	0.31	6.06		2	0	0	0	1	30
jonesal01	1894	1	PHI	NL	1	0	1	1	1	0	0	27	10	2	0	0	2	0.27	2		0	0	0	0	0	4
jordaha01	1894	1	PIT	NL	1	0	1	1	1	0	0	27	10	4	0	2	1	0.27	4		0	0	0	0	0	7
kennebr01	1894	1	BRO	NL	24	20	48	41	34	0	2	1082	445	197	15	149	107	0.3	4.92		21	0	0	0	7	291
killefr01	1894	1	PIT	NL	14	11	28	28	20	1	0	612	261	102	3	86	62	0.3	4.5		2	0	0	0	0	148
kilroma01	1894	1	LS3	NL	0	5	8	7	3	0	0	111	46	16	2	20	11	0.3	3.89		1	0	0	0	1	34
knausfr01	1894	1	CL4	NL	0	1	2	2	1	0	0	33	7	7	0	14	2	0.18	5.73		2	0	0	0	0	9
knellph01	1894	1	PIT	NL	0	0	1	0	0	0	0	21	11	9	0	6	0	0.35	11.57		1	0	0	0	1	9
knellph01	1894	2	LS3	NL	7	21	32	28	25	0	0	741	330	146	9	104	67	0.31	5.32		13	0	0	0	4	237
korwaji01	1894	1	BRO	NL	0	0	1	0	0	0	0	15	9	8	1	5	2	0.38	14.4		1	0	0	0	1	14
lampehe01	1894	1	BSN	NL	0	1	2	1	0	0	0	16	17	7	5	7	1	0.52	11.81		1	0	0	0	1	19
lovetto01	1894	1	BSN	NL	8	6	15	13	10	0	0	312	155	69	12	36	23	0.34	5.97		2	0	0	0	2	96
lucidco01	1894	1	BRO	NL	5	3	10	9	7	0	0	214	87	52	6	44	15	0.29	6.56		7	0	0	0	1	68
lukenal01	1894	1	PHI	NL	0	1	3	2	1	0	0	45	26	17	0	10	0	0.37	10.2		0	0	0	0	1	22
lystobi01	1894	1	CL4	NL	0	0	1	1	0	0	0	11	5	4	1	4	0	0.32	9.82		0	0	0	0	0	6
malarjo01	1894	1	WAS	NL	2	1	3	3	3	0	0	78	42	12	1	5	3	0.35	4.15		1	0	0	0	0	22
masoner01	1894	1	SLN	NL	0	3	4	2	2	0	0	68	34	18	1	10	3	0.34	7.15		0	0	0	0	2	29
maulal01	1894	1	WAS	NL	11	15	29	27	21	0	0	614	275	135	12	73	34	0.31	5.94		7	0	0	0	2	200
mccarto01	1894	1	BSN	NL	0	0	1	0	0	0	0	6	1	1	0	3	0	0.14	4.5		1	0	0	0	1	1
mcgilwi01	1894	1	CHN	NL	7	19	27	23	22	0	0	624	272	135	2	117	58	0.31	5.84		6	0	0	0	3	195
mcgui01	1894	1	CIN	NL	0	0	1	0	0	0	0	18	15	7	0	5	1	0.46	10.5		0	0	0	0	1	9
mcmahsa01	1894	1	BLN	NL	25	8	35	33	26	0	0	827	317	129	7	111	60	0.28	4.21		5	0	0	0	2	176
meekijo01	1894	1	NY1	NL	33	9	52	48	40	1	2	1227	404	168	13	171	133	0.25	3.7		21	0	0	0	4	234
menefjo01	1894	1	LS3	NL	8	17	28	24	20	1	0	635	258	101	3	50	43	0.29	4.29		3	0	0	0	4	153
[truncated: 42,964 more rows]
