# Supplementary material for: Ten quick tips for getting the most scientific value out of numerical data
Source: PLoS Comput Biol. 2018 Oct 11;14(10):e1006141. doi: 10.1371/journal.pcbi.1006141 (PMC6181270; doi:10.1371/journal.pcbi.1006141)
Supplement: S3 Data — This archive contains selected tables of the Lahman Baseball Database [41] (in comma-separated values format) by Sean Lahman, licensed under a Creative Commons Attribution-ShareAlike 3.0 Unported License [42], and our Python code implementing the calculations described in Supporting Information S1 Text. (TGZ) [file pcbi.1006141.s004.tgz › pValueHackingExample/data/readme2014.txt]

The Lahman Baseball Database

2014 Version
Release Date: January 24, 2015

----------------------------------------------------------------------

README CONTENTS
0.1 Copyright Notice
0.2 Contact Information

1.0 Release Contents
1.1 Introduction
1.2 What's New
1.3 Acknowledgements
1.4 Using this Database
1.5 Revision History

2.0 Data Tables
2.1 MASTER table
2.2 Batting Table
2.3 Pitching table
2.4 Fielding Table
2.5 All-Star table
2.6 Hall of Fame table
2.7 Managers table
2.8 Teams table
2.9 BattingPost table
2.10 PitchingPost table
2.11 TeamFranchises table
2.12 FieldingOF table
2.13 ManagersHalf table
2.14 TeamsHalf table
2.15 Salaries table
2.16 SeriesPost table
2.17 AwardsManagers table
2.18 AwardsPlayers table
2.19 AwardsShareManagers table
2.20 AwardsSharePlayers table
2.21 FieldingPost table
2.22 Appearances table
2.23 Schools table
2.24 SchoolsPlayers table


----------------------------------------------------------------------

0.1 Copyright Notice & Limited Use License

This database is copyright 1996-2015 by Sean Lahman.

This work is licensed under a Creative Commons Attribution-ShareAlike 3.0 Unported License. For details see: http://creativecommons.org/licenses/by-sa/3.0/


For licensing information or further information, contact Sean Lahman
at: seanlahman@gmail.com

----------------------------------------------------------------------

0.2 Contact Information

Web site: http://www.baseball1.com
E-Mail : seanlahman@gmail.com

If you're interested in contributing to the maintenance of this
database or making suggestions for improvement, please consider
joining our mailinglist at:

    http://groups.yahoo.com/group/baseball-databank/

If you are interested in similar databases for other sports, please
vist the Open Source Sports website at http://OpenSourceSports.com

----------------------------------------------------------------------
1.0  Release Contents

This release of the database can be downloaded in several formats. The
contents of each version are listed below.

MS Access Versions:
      lahman2014.mdb
      2014readme.txt

SQL version
      lahman2043.sql
      lahman2014_tables.sql
      2014readme.txt

Comma Delimited Version:
      2014readme.txt
      AllStarFull.csv
      Appearances.csv
      AwardsManagers.csv
      AwardsPlayers.csv
      AwardsShareManagers.csv
      AwardsSharePlayers.csv
      Batting.csv
      BattingPost.csv
      CollegePlaying.csv
      Fielding.csv
      FieldingOF.csv
      FieldingPost.csv
      HallOfFame.csv
      Managers.csv
      ManagersHalf.csv
      Master.csv
      Pitching.csv
      PitchingPost.csv
      Salaries.csv
      Schools.csv
      SeriesPost.csv
      Teams.csv
      TeamsFranchises.csv
      TeamsHalf.csv

----------------------------------------------------------------------
1.1 Introduction

This database contains pitching, hitting, and fielding statistics for
Major League Baseball from 1871 through 2014.  It includes data from
the two current leagues (American and National), the four other "major"
leagues (American Association, Union Association, Players League, and
Federal League), and the National Association of 1871-1875.

This database was created by Sean Lahman, who pioneered the effort to
make baseball statistics freely available to the general public. What
started as a one man effort in 1994 has grown tremendously, and now a
team of researchers have collected their efforts to make this the
largest and most accurate source for baseball statistics available
anywhere. (See Acknowledgements below for a list of the key
contributors to this project.)

None of what we have done would have been possible without the
pioneering work of Hy Turkin, S.C. Thompson, David Neft, and Pete
Palmer (among others).  All baseball fans owe a debt of gratitude
to the people who have worked so hard to build the tremendous set
of data that we have today.  Our thanks also to the many members of
the Society for American Baseball Research who have helped us over
the years.  We strongly urge you to support and join their efforts.
Please vist their website (www.sabr.org).

If you have any problems or find any errors, please let us know.  Any
feedback is appreciated

----------------------------------------------------------------------
1.2 What's New in 2014

Player stats have been updated through 2014 season.

Removed two deprecated fields from the batting table. The G_batting and
G_old fields were rendered obsolete when we created the appearances table.
They've beenremoved from the batting table starting with this version

SchoolsPlayers has been replaced with a new table called CollegePlaying.
This reflects advances in the compilation of this data, largely led by
Ted Turocy. The old table reported college attendance for major league
players by listing a start date and end date.  The new version has a
separate record for each year that a player attended.  This allows
us to better account for players who attended multiple colleges or
skipped a season, as well as to identify teammates.


----------------------------------------------------------------------
1.3 Acknowledgements

Much of the raw data contained in this database comes from the work of
Pete Palmer, the legendary statistician, who has had a hand in most
of the baseball encylopedias published since 1974. He is largely
responsible for bringing the batting, pitching, and fielding data out
of the dark ages and into the computer era.  Without him, none of this
would be possible.  For more on Pete's work, please read his own
account at: http://sabr.org/cmsfiles/PalmerDatabaseHistory.pdf

Three people have been key contributors to the work that followed, first
by taking the raw data and creating a relational database, and later
by extending the database to make it more accesible to researchers.

Sean Lahman launched the Baseball Archive's website back before
most people had heard of the world wide web.  Frustrated by the
lack of sports data available, he led the effort to build a
baseball database that everyone could use. Baseball researchers
everywhere owe him a debt of gratitude.  Lahman served as an associate
editor for three editions of Total Baseball and contributed to five
editions of The ESPN Baseball Encyclopedia. He has also been active in
developing databases for other sports.

The work of Sean Forman to create and maintain an online encyclopedia
at "baseball-reference.com" has been remarkable. Recognized as the
premier online reference source, Forman's site provides an oustanding
interface to the raw data. His efforts to help streamline the database
have been extremely helpful. Most importantly, Forman has spearheaded
the effort to provide standards that enable several different baseball
databases to be used together. He was also instrumental in launching
the Baseball Databank, a forum for researchers to gather and share
their work.

Since 2001, these two Seans have led a group of researchers
who volunteered to maintain and update the database.

Ted Turocy has done the lion's share of the work to updating the main
data tables since 2012, including significant imporvements to the
demographic data in the master table. In his role as SABR data czar,
he led the effort to document college playing stints for all
major league players. Turocy also spearheads the Chadwick Baseball
Bureau. For more details on his tools and services, visit:
http://chadwick.sourceforge.net/doc/index.html

A handful of researchers have made substantial contributions to
maintain this database over years. Listed alphabetically, they
are: Derek Adair, Mike Crain, Kevin Johnson, Rod Nelson, Tom Tango,
and Paul Wendt. These folks did much of the heavy lifting, and are
largely responsible for the improvements made since 2000.

Others who made important contributions include: Dvd Avins,
Clifford Blau, Bill Burgess, Clem Comly, Jeff Burk, Randy Cox,
Mitch Dickerman, Paul DuBois, Mike Emeigh, F.X. Flinn, Bill Hickman,
Jerry Hoffman, Dan Holmes, Micke Hovmoller, Peter Kreutzer,
Danile Levine, Bruce Macleod, Ken Matinale, Michael Mavrogiannis,
Cliff Otto, Alberto Perdomo, Dave Quinn, John Rickert, Tom Ruane,
Theron Skyles, Hans Van Slooten, Michael Westbay, and Rob Wood.

Many other people have made significant contributions to the database
over the years.  The contribution of Tom Ruane's effort to the overall
quality of the underlying data has been tremendous. His work at
retrosheet.org integrates the yearly data with the day-by-day data,
creating a reference source of startling depth. It is unlikely than
any individual has contributed as much to the field of baseball
research in the past five years as Ruane has.

Sean Holtz helped with a major overhaul and redesign before the
2000 season. Keith Woolner was instrumental in helping turn
a huge collection of stats into a relational database in the mid-1990s.
Clifford Otto & Ted Nye also helped provide guidance to the early
versions. Lee Sinnis, John Northey & Erik Greenwood helped supply key
pieces of data. Many others have written in with corrections and
suggestions that made each subsequent version even better than what
preceded it.

The work of the SABR Baseball Records Committee, led by Lyle Spatz
has been invaluable.  So has the work of Bill Carle and the SABR
Biographical Committee. David Vincent, keeper of the Home Run Log and
other bits of hard to find info, has always been helpful. The recent
addition of colleges to player bios is the result of much research by
members of SABR's Collegiate Baseball committee.

Salary data was first supplied by Doug Pappas, who passed away during
the summer of 2004. He was the leading authority on many subjects,
most significantly the financial history of Major League Baseball.
We are grateful that he allowed us to include some of the data he
compiled.  His work has been continued by the SABR Business of
Baseball committee.

Thanks is also due to the staff at the National Baseball Library
in Cooperstown who have been so helpful over the years, including
Tim Wiles, Jim Gates, Bruce Markusen, and the rest of the staff.

A special debt of gratitude is owed to Dave Smith and the folks at
Retrosheet. There is no other group working so hard to compile and
share baseball data.  Their website (www.retrosheet.org) will give
you a taste of the wealth of information Dave and the gang have collected.

Thanks to all contributors great and small. What you have created is
a wonderful thing.

----------------------------------------------------------------------
1.4 Using this Database

This version of the database is available in Microsoft Access
format, SQL files or in a generic, comma delimited format. Because this is a
relational database, you will not be able to use the data in a
flat-database application.

Please note that this is not a stand alone application.  It requires
a database application or some other application designed specifically
to interact with the database.

If you are unable to import the data directly, you should download the
database in the delimted text format.  Then use the documentation
in sections 2.1 through 2.22 of this document to import the data into
your database application.

----------------------------------------------------------------------
1.5 Revision History

     Version      Date            Comments
       1.0      December 1992     Database ported from dBase
       1.1      May 1993          Becomes fully relational
       1.2      July 1993         Corrections made to full database
       1.21     December 1993     1993 statistics added
       1.3      July 1994         Pre-1900 data added
       1.31     February 1995     1994 Statistics added
       1.32     August 1995       Statistics added for other leagues
       1.4      September 1995    Fielding Data added
       1.41     November 1995     1995 statistics added
       1.42     March 1996        HOF/All-Star tables added
       1.5-MS   October 1996      1st public release - MS Access format
       1.5-GV   October 1996      Released generic comma-delimted files
       1.6-MS   December 1996     Updated with 1996 stats, some corrections
       1.61-MS  December 1996     Corrected error in MASTER table
       1.62     February 1997     Corrected 1914-1915 batters data and updated
       2.0      February 1998     Major Revisions-added teams & managers
       2.1      October 1998      Interim release w/1998 stats
       2.2      January 1999      New release w/post-season stats & awards added
       3.0	November 1999	  Major release - fixed errors and 1999 statistics added
       4.0      May 2001	  Major release - proofed & redesigned tables
       4.5      March 2002        Updated with 2001 stats and added new biographical data
       5.0      December 2002     Major revision - new tables and data
       5.1      January 2004      Updated with 2003 data, and new pitching categories
       5.2      November 2004     Updated with 2004 season statistics.
       5.3      December 2005     Updated with 2005 season statistics.
       5.4      December 2006     Updated with 2006 season statistics.
       5.5      December 2007     Updated with 2007 season statistics.
       5.6      December 2008     Updated with 2008 season statistics.
       5.7      December 2009     Updated for 2009 and added several tables.
       5.8      December 2010     Updated with 2010 season statistics.
       5.9      December 2011     Updated for 2011 and removed obsolete tables.
       2012     December 2012     Updated with 2012 season statistics
       2013     December 2013     Updated with 2013 season statistics
       2014     December 2014     Updated with 2013 season statistics


------------------------------------------------------------------------------
2.0 Data Tables

The design follows these general principles.  Each player is assigned a
unique number (playerID).  All of the information relating to that player
is tagged with his playerID.  The playerIDs are linked to names and
birthdates in the MASTER table.

The database is comprised of the following main tables:

  MASTER - Player names, DOB, and biographical info
  Batting - batting statistics
  Pitching - pitching statistics
  Fielding - fielding statistics

It is supplemented by these tables:

  AllStarFull - All-Star appearances
  HallofFame - Hall of Fame voting data
  Managers - managerial statistics
  Teams - yearly stats and standings
  BattingPost - post-season batting statistics
  PitchingPost - post-season pitching statistics
  TeamFranchises - franchise information
  FieldingOF - outfield position data
  FieldingPost- post-season fieldinf data
  ManagersHalf - split season data for managers
  TeamsHalf - split season data for teams
  Salaries - player salary data
  SeriesPost - post-season series information
  AwardsManagers - awards won by managers
  AwardsPlayers - awards won by players
  AwardsShareManagers - award voting for manager awards
  AwardsSharePlayers - award voting for player awards
  Appearances - details on the positions a player appeared at
  Schools - list of colleges that players attended
  CollegePlaying - list of players and the colleges they attended


Sections 2.1 through 2.24 of this document describe each of the tables in
detail and the fields that each contains.


--------------------------------------------------------------------------
2.1 MASTER table


playerID       A unique code asssigned to each player.  The playerID links
                 the data in this file with records in the other files.
birthYear      Year player was born
birthMonth     Month player was born
birthDay       Day player was born
birthCountry   Country where player was born
birthState     State where player was born
birthCity      City where player was born
deathYear      Year player died
deathMonth     Month player died
deathDay       Day player died
deathCountry   Country where player died
deathState     State where player died
deathCity      City where player died
nameFirst      Player's first name
nameLast       Player's last name
nameGiven      Player's given name (typically first and middle)
weight         Player's weight in pounds
height         Player's height in inches
bats           Player's batting hand (left, right, or both)
throws         Player's throwing hand (left or right)
debut          Date that player made first major league appearance
finalGame      Date that player made first major league appearance (blank if still active)
retroID        ID used by retrosheet
bbrefID        ID used by Baseball Reference website


------------------------------------------------------------------------------
2.2 Batting Table
playerID       Player ID code
yearID         Year
stint          player's stint (order of appearances within a season)
teamID         Team
lgID           League
G              Games
AB             At Bats
R              Runs
H              Hits
2B             Doubles
3B             Triples
HR             Homeruns
RBI            Runs Batted In
SB             Stolen Bases
CS             Caught Stealing
BB             Base on Balls
SO             Strikeouts
IBB            Intentional walks
HBP            Hit by pitch
SH             Sacrifice hits
SF             Sacrifice flies
GIDP           Grounded into double plays

------------------------------------------------------------------------------
2.3 Pitching table

playerID       Player ID code
yearID         Year
stint          player's stint (order of appearances within a season)
teamID         Team
lgID           League
W              Wins
L              Losses
G              Games
GS             Games Started
CG             Complete Games
SHO            Shutouts
SV             Saves
IPOuts         Outs Pitched (innings pitched x 3)
H              Hits
ER             Earned Runs
HR             Homeruns
BB             Walks
SO             Strikeouts
BAOpp          Opponent's Batting Average
ERA            Earned Run Average
IBB            Intentional Walks
WP             Wild Pitches
HBP            Batters Hit By Pitch
BK             Balks
BFP            Batters faced by Pitcher
GF             Games Finished
R              Runs Allowed
SH             Sacrifices by opposing batters
SF             Sacrifice flies by opposing batters
GIDP           Grounded into double plays by opposing batter
------------------------------------------------------------------------------
2.4 Fielding Table

playerID       Player ID code
yearID         Year
stint          player's stint (order of appearances within a season)
teamID         Team
lgID           League
Pos            Position
G              Games
GS             Games Started
InnOuts        Time played in the field expressed as outs
PO             Putouts
A              Assists
E              Errors
DP             Double Plays
PB             Passed Balls (by catchers)
WP             Wild Pitches (by catchers)
SB             Opponent Stolen Bases (by catchers)
CS             Opponents Caught Stealing (by catchers)
ZR             Zone Rating

------------------------------------------------------------------------------
2.5  AllstarFull table

playerID       Player ID code
YearID         Year
gameNum        Game number (zero if only one All-Star game played that season)
gameID         Retrosheet ID for the game idea
teamID         Team
lgID           League
GP             1 if Played in the game
startingPos    If player was game starter, the position played
------------------------------------------------------------------------------
2.6  HallOfFame table

playerID       Player ID code
yearID         Year of ballot
votedBy        Method by which player was voted upon
ballots        Total ballots cast in that year
needed         Number of votes needed for selection in that year
votes          Total votes received
inducted       Whether player was inducted by that vote or not (Y or N)
category       Category in which candidate was honored
needed_note    Explanation of qualifiers for special elections
------------------------------------------------------------------------------
2.7  Managers table

playerID       Player ID Number
yearID         Year
teamID         Team
lgID           League
inseason       Managerial order.  Zero if the individual managed the team
                 the entire year.  Otherwise denotes where the manager appeared
                 in the managerial order (1 for first manager, 2 for second, etc.)
G              Games managed
W              Wins
L              Losses
rank           Team's final position in standings that year
plyrMgr        Player Manager (denoted by 'Y')

------------------------------------------------------------------------------
2.8  Teams table

yearID         Year
lgID           League
teamID         Team
franchID       Franchise (links to TeamsFranchise table)
divID          Team's division
Rank           Position in final standings
G              Games played
GHome          Games played at home
W              Wins
L              Losses
DivWin         Division Winner (Y or N)
WCWin          Wild Card Winner (Y or N)
LgWin          League Champion(Y or N)
WSWin          World Series Winner (Y or N)
R              Runs scored
AB             At bats
H              Hits by batters
2B             Doubles
3B             Triples
HR             Homeruns by batters
BB             Walks by batters
SO             Strikeouts by batters
SB             Stolen bases
CS             Caught stealing
HBP            Batters hit by pitch
SF             Sacrifice flies
RA             Opponents runs scored
ER             Earned runs allowed
ERA            Earned run average
CG             Complete games
SHO            Shutouts
SV             Saves
IPOuts         Outs Pitched (innings pitched x 3)
HA             Hits allowed
HRA            Homeruns allowed
BBA            Walks allowed
SOA            Strikeouts by pitchers
E              Errors
DP             Double Plays
FP             Fielding  percentage
name           Team's full name
park           Name of team's home ballpark
attendance     Home attendance total
BPF            Three-year park factor for batters
PPF            Three-year park factor for pitchers
teamIDBR       Team ID used by Baseball Reference website
teamIDlahman45 Team ID used in Lahman database version 4.5
teamIDretro    Team ID used by Retrosheet

------------------------------------------------------------------------------
2.9  BattingPost table

yearID         Year
round          Level of playoffs
playerID       Player ID code
teamID         Team
lgID           League
G              Games
AB             At Bats
R              Runs
H              Hits
2B             Doubles
3B             Triples
HR             Homeruns
RBI            Runs Batted In
SB             Stolen Bases
CS             Caught stealing
BB             Base on Balls
SO             Strikeouts
IBB            Intentional walks
HBP            Hit by pitch
SH             Sacrifices
SF             Sacrifice flies
GIDP           Grounded into double plays

------------------------------------------------------------------------------
2.10  PitchingPost table

playerID       Player ID code
yearID         Year
round          Level of playoffs
teamID         Team
lgID           League
W              Wins
L              Losses
G              Games
GS             Games Started
CG             Complete Games
SHO             Shutouts
SV             Saves
IPOuts         Outs Pitched (innings pitched x 3)
H              Hits
ER             Earned Runs
HR             Homeruns
BB             Walks
SO             Strikeouts
BAOpp          Opponents' batting average
ERA            Earned Run Average
IBB            Intentional Walks
WP             Wild Pitches
HBP            Batters Hit By Pitch
BK             Balks
BFP            Batters faced by Pitcher
GF             Games Finished
R              Runs Allowed
SH             Sacrifice Hits allowed
SF             Sacrifice Flies allowed
GIDP           Grounded into Double Plays

------------------------------------------------------------------------------
2.11 TeamFranchises table

franchID       Franchise ID
franchName     Franchise name
active         Whetehr team is currently active (Y or N)
NAassoc        ID of National Association team franchise played as

------------------------------------------------------------------------------
2.12 FieldingOF table

playerID       Player ID code
yearID         Year
stint          player's stint (order of appearances within a season)
Glf            Games played in left field
Gcf            Games played in center field
Grf            Games played in right field

------------------------------------------------------------------------------
2.13 ManagersHalf table

playerID       Manager ID code
yearID         Year
teamID         Team
lgID           League
inseason       Managerial order.  One if the individual managed the team
                 the entire year.  Otherwise denotes where the manager appeared
                 in the managerial order (1 for first manager, 2 for second, etc.)
half           First or second half of season
G              Games managed
W              Wins
L              Losses
rank           Team's position in standings for the half

------------------------------------------------------------------------------
2.14 TeamsHalf table

yearID         Year
lgID           League
teamID         Team
half           First or second half of season
divID          Division
DivWin         Won Division (Y or N)
rank           Team's position in standings for the half
G              Games played
W              Wins
L              Losses

------------------------------------------------------------------------------
2.15 Salaries table

yearID         Year
teamID         Team
lgID           League
playerID       Player ID code
salary         Salary

------------------------------------------------------------------------------
2.16 SeriesPost table

yearID         Year
round          Level of playoffs
teamIDwinner   Team ID of the team that won the series
lgIDwinner     League ID of the team that won the series
teamIDloser    Team ID of the team that lost the series
lgIDloser      League ID of the team that lost the series
wins           Wins by team that won the series
losses         Losses by team that won the series
ties           Tie games
------------------------------------------------------------------------------
2.17 AwardsManagers table

playerID       Manager ID code
awardID        Name of award won
yearID         Year
lgID           League
tie            Award was a tie (Y or N)
notes          Notes about the award

------------------------------------------------------------------------------
2.18 AwardsPlayers table

playerID       Player ID code
awardID        Name of award won
yearID         Year
lgID           League
tie            Award was a tie (Y or N)
notes          Notes about the award

------------------------------------------------------------------------------
2.19 AwardsShareManagers table

awardID        name of award votes were received for
yearID         Year
lgID           League
playerID       Manager ID code
pointsWon      Number of points received
pointsMax      Maximum numner of points possible
votesFirst     Number of first place votes

------------------------------------------------------------------------------
2.20 AwardsSharePlayers table

awardID        name of award votes were received for
yearID         Year
lgID           League
playerID       Player ID code
pointsWon      Number of points received
pointsMax      Maximum numner of points possible
votesFirst     Number of first place votes

------------------------------------------------------------------------------
2.21 FieldingPost table

playerID       Player ID code
yearID         Year
teamID         Team
lgID           League
round          Level of playoffs
Pos            Position
G              Games
GS             Games Started
InnOuts        Time played in the field expressed as outs
PO             Putouts
A              Assists
E              Errors
DP             Double Plays
TP             Triple Plays
PB             Passed Balls
SB             Stolen Bases allowed (by catcher)
CS             Caught Stealing (by catcher)

------------------------------------------------------------------------------
2.22 Appearances table

yearID         Year
teamID         Team
lgID           League
playerID       Player ID code
G_all          Total games played
GS             Games started
G_batting      Games in which player batted
G_defense      Games in which player appeared on defense
G_p            Games as pitcher
G_c            Games as catcher
G_1b           Games as firstbaseman
G_2b           Games as secondbaseman
G_3b           Games as thirdbaseman
G_ss           Games as shortstop
G_lf           Games as leftfielder
G_cf           Games as centerfielder
G_rf           Games as right fielder
G_of           Games as outfielder
G_dh           Games as designated hitter
G_ph           Games as pinch hitter
G_pr           Games as pinch runner


------------------------------------------------------------------------------
2.23 Schools table
schoolID       school ID code
schoolName     school name
schoolCity     city where school is located
schoolState    state where school's city is located
schoolNick     nickname for school's baseball team


------------------------------------------------------------------------------
2.24 CollegePlaying table
playerid       Player ID code
schoolID       school ID code
year           year


<end of file>
