# Supplementary material for: Ten quick tips for getting the most scientific value out of numerical data
Source: PLoS Comput Biol. 2018 Oct 11;14(10):e1006141. doi: 10.1371/journal.pcbi.1006141 (PMC6181270; doi:10.1371/journal.pcbi.1006141)
Supplement: S4 Data — UQ, uncertainty quantification. (TGZ) [file pcbi.1006141.s005.tgz]

Archive with 2 entries (2 files):
- birdMonteCarloUncertaintyQuantificationExample/mc_uq_birds.py
- birdMonteCarloUncertaintyQuantificationExample/license_CC0.txt
