# Supplementary material for: Ten quick tips for getting the most scientific value out of numerical data
Source: PLOS journal article supplement (doi:10.1371/journal.pcbi.1006141), 2018-10-11
Supplement: S7 (10.1371/journal.pcbi.1006141.s007) [file journal.pcbi.1006141.s007.tgz]

Archive with 10 entries (10 files):
- flowerExample/dandelionCount.py
- flowerExample/license_CC0.txt
- flowerExample/DSC_5883.jpg
- flowerExample/DSC_5884.jpg
- flowerExample/DSC_5885.jpg
- flowerExample/DSC_5886.jpg
- flowerExample/test_image.jpg
- flowerExample/rawImages/DSC_5883.NEF
- flowerExample/rawImages/DSC_5883.NEF.xmp
- flowerExample/rawImages/DSC_5884.NEF
