# Supplementary material for: Ten quick tips for getting the most scientific value out of numerical data
Source: PLOS journal article supplement (doi:10.1371/journal.pcbi.1006141), 2018-10-11
Supplement: S7 (10.1371/journal.pcbi.1006141.s007) [file journal.pcbi.1006141.s007.tgz › flowerExample/dandelionCount.py]

#!/usr/bin/env python3

# The code in this file and the images analyzed here are released under the Creative Commons CC0 license,
# i.e., for unrestricted use and without any warranty,
# see the file license_CC0.txt or https://creativecommons.org/publicdomain/zero/1.0/

from scipy.misc import imread, imsave, imshow
from numpy import sum


# physical length of the flashlight (black rod) visible in the images
FLASHLIGHT_LENGTH_IN_M = 163 * 1.0e-3  # 163 mm in m

def isCloseToYellow(pixel_values):
    # any value (> 95 % yellow [red and green]) … white is considered yellow for the purpose of this analysis
    red_index = 0
    green_index = 1
    red_threshold = 243
    green_threshold = 243
    return (pixel_values[red_index] >= red_threshold) and (pixel_values[green_index] >= green_threshold)


def yellowArea(filename, flashlight_length_in_pixels):
    img = list(imread(filename))
    thresholded_image = [[255 if isCloseToYellow(img[i][j]) else 0 for j in range(len(img[i]))] for i in range(len(img))]
    imsave(filename[:-4]+'-thresholded.png', thresholded_image)
    num_yellow_pixels = sum(thresholded_image)/255
    pixel_area = (FLASHLIGHT_LENGTH_IN_M/flashlight_length_in_pixels)**2
    return(num_yellow_pixels*pixel_area)


def getCalibration():
    # two images with one dandelion each,
    # length of flashlight visible in image measured manually
    return 0.5 * ( yellowArea("DSC_5885.jpg", 490) + yellowArea("DSC_5886.jpg", 720) )


def countNumberOfDandelions(calibration, filename, flashlight_length_in_pixels):
    # we assume that the error (yellow pixels in the image that are not part of the flowers) is the same in all images
    num_dandelions = int(round(yellowArea(filename, flashlight_length_in_pixels) / calibration))
    print(filename + ' contains %d dandelions.'%num_dandelions)


def testCountNumberOfDandelions():
    print("The following should report 121 dandelions")
    countNumberOfDandelions(FLASHLIGHT_LENGTH_IN_M**2, "test_image.jpg", 1.)

calibration = getCalibration()
# again, length of flashlight visible in the images measured manually
# note: this neglects perspective projection
countNumberOfDandelions(calibration, "DSC_5884.jpg", 459)
countNumberOfDandelions(calibration, "DSC_5883.jpg", 530)
