# Supplementary material for: Ten quick tips for getting the most scientific value out of numerical data
Source: PLOS journal article supplement (doi:10.1371/journal.pcbi.1006141), 2018-10-11
Supplement: S7 (10.1371/journal.pcbi.1006141.s007) [file journal.pcbi.1006141.s007.tgz › flowerExample/rawImages/DSC_5883.NEF.xmp]

<?xml version="1.0" encoding="UTF-8"?>
<x:xmpmeta xmlns:x="adobe:ns:meta/" x:xmptk="XMP Core 4.4.0-Exiv2">
 <rdf:RDF xmlns:rdf="http://www.w3.org/1999/02/22-rdf-syntax-ns#">
  <rdf:Description rdf:about=""
    xmlns:exif="http://ns.adobe.com/exif/1.0/"
    xmlns:xmp="http://ns.adobe.com/xap/1.0/"
    xmlns:xmpMM="http://ns.adobe.com/xap/1.0/mm/"
    xmlns:darktable="http://darktable.sf.net/"
   exif:GPSLatitude="50,52.879944N"
   exif:GPSLongitude="9,30.740147E"
   xmp:Rating="1"
   xmpMM:DerivedFrom="DSC_5883.NEF"
   darktable:xmp_version="2"
   darktable:raw_params="0"
   darktable:auto_presets_applied="1"
   darktable:history_end="13">
   <darktable:mask_id>
    <rdf:Seq/>
   </darktable:mask_id>
   <darktable:mask_type>
    <rdf:Seq/>
   </darktable:mask_type>
   <darktable:mask_name>
    <rdf:Seq/>
   </darktable:mask_name>
   <darktable:mask_version>
    <rdf:Seq/>
   </darktable:mask_version>
   <darktable:mask>
    <rdf:Seq/>
   </darktable:mask>
   <darktable:mask_nb>
    <rdf:Seq/>
   </darktable:mask_nb>
   <darktable:mask_src>
    <rdf:Seq/>
   </darktable:mask_src>
   <darktable:history>
    <rdf:Seq>
     <rdf:li
      darktable:operation="flip"
      darktable:enabled="1"
      darktable:modversion="2"
      darktable:params="ffffffff"
      darktable:multi_name=""
      darktable:multi_priority="0"
      darktable:blendop_version="7"
      darktable:blendop_params="gz12eJxjYGBgkGAAgRNODESDBnsIHll8ANNSGQM="/>
     <rdf:li
      darktable:operation="basecurve"
      darktable:enabled="1"
      darktable:modversion="4"
      darktable:params="gz09eJxjYICAeiM3m+S3760jl06xtX7Ianfo+zy7i5us7DvqZexfzim2Z2BogOJRMJQAGxKbCUO2wR4AZwgRSw=="
      darktable:multi_name=""
      darktable:multi_priority="0"
      darktable:blendop_version="7"
      darktable:blendop_params="gz12eJxjYGBgkGAAgRNODESDBnsIHll8ANNSGQM="/>
     <rdf:li
      darktable:operation="shadhi"
      darktable:enabled="1"
      darktable:modversion="5"
      darktable:params="000000000000c8420000484200000000000048c200000000000048420000c842000048427f000000bd37863500000000"
      darktable:multi_name=""
      darktable:multi_priority="0"
      darktable:blendop_version="7"
      darktable:blendop_params="gz12eJxjYGBgkGAAgRNODESDBnsIHll8ANNSGQM="/>
     <rdf:li
      darktable:operation="sharpen"
      darktable:enabled="1"
      darktable:modversion="1"
      darktable:params="000000400000003f0000003f"
      darktable:multi_name=""
      darktable:multi_priority="0"
      darktable:blendop_version="7"
      darktable:blendop_params="gz12eJxjYGBgkGAAgRNODESDBnsIHll8ANNSGQM="/>
     <rdf:li
      darktable:operation="rawprepare"
      darktable:enabled="1"
      darktable:modversion="1"
      darktable:params="080000000200000018000000020000000000000000000000280f0000"
      darktable:multi_name=""
      darktable:multi_priority="0"
      darktable:blendop_version="7"
      darktable:blendop_params="gz12eJxjYGBgkGAAgRNODESDBnsIHll8ANNSGQM="/>
     <rdf:li
      darktable:operation="temperature"
      darktable:enabled="1"
      darktable:modversion="3"
      darktable:params="000001400000803f0080c43f0000c07f"
      darktable:multi_name=""
      darktable:multi_priority="0"
      darktable:blendop_version="7"
      darktable:blendop_params="gz12eJxjYGBgkGAAgRNODESDBnsIHll8ANNSGQM="/>
     <rdf:li
      darktable:operation="highlights"
      darktable:enabled="1"
      darktable:modversion="2"
      darktable:params="000000000000803f00000000000000000000803f"
      darktable:multi_name=""
      darktable:multi_priority="0"
      darktable:blendop_version="7"
      darktable:blendop_params="gz12eJxjYGBgkGAAgRNODESDBnsIHll8ANNSGQM="/>
     <rdf:li
      darktable:operation="demosaic"
      darktable:enabled="1"
      darktable:modversion="3"
      darktable:params="0000000000000000000000000000000000000000"
      darktable:multi_name=""
      darktable:multi_priority="0"
      darktable:blendop_version="7"
      darktable:blendop_params="gz12eJxjYGBgkGAAgRNODESDBnsIHll8ANNSGQM="/>
     <rdf:li
      darktable:operation="denoiseprofile"
      darktable:enabled="1"
      darktable:modversion="3"
      darktable:params="0000803f0000803f000080bf2175993680cae136ac3e88332caa34b4e62e19b400000000"
      darktable:multi_name=""
      darktable:multi_priority="0"
      darktable:blendop_version="7"
      darktable:blendop_params="gz12eJxjYGBgkGAAgRNODESDBnsIHll8ANNSGQM="/>
     <rdf:li
      darktable:operation="lens"
      darktable:enabled="1"
      darktable:modversion="5"
      darktable:params="gz03eJyzZoCAGw5N9gwMB4D4hCMDwwSHapWF9oxAcb/M7Pw8BRdjQwMDhoEAEPsd3XSDFVwiFKLy83N1gULZ+UUKhha6hgamubkKafrGeqa6pnpm7gquLgphQTRwRYM9BDMwAABDMxlD"
      darktable:multi_name=""
      darktable:multi_priority="0"
      darktable:blendop_version="7"
      darktable:blendop_params="gz12eJxjYGBgkGAAgRNODESDBnsIHll8ANNSGQM="/>
     <rdf:li
      darktable:operation="clipping"
      darktable:enabled="1"
      darktable:modversion="5"
      darktable:params="00000000b02cad3ec49628341909563f0000803f0000000000000000cdcc4c3ecdcc4c3ecdcc4c3fcdcc4c3ecdcc4c3fcdcc4c3fcdcc4c3ecdcc4c3f0000000000000000000000000100000003000000fcffffff"
      darktable:multi_name=""
      darktable:multi_priority="0"
      darktable:blendop_version="7"
      darktable:blendop_params="gz12eJxjYGBgkGAAgRNODESDBnsIHll8ANNSGQM="/>
     <rdf:li
      darktable:operation="exposure"
      darktable:enabled="1"
      darktable:modversion="5"
      darktable:params="000000000000000078e9a6be00004842000080c0"
      darktable:multi_name=""
      darktable:multi_priority="0"
      darktable:blendop_version="7"
      darktable:blendop_params="gz12eJxjYGBgkGAAgRNODESDBnsIHll8ANNSGQM="/>
     <rdf:li
      darktable:operation="levels"
      darktable:enabled="1"
      darktable:modversion="2"
      darktable:params="0000000000000000000048420000c842000000000000ff3e00007f3f"
      darktable:multi_name=""
      darktable:multi_priority="0"
      darktable:blendop_version="7"
      darktable:blendop_params="gz12eJxjYGBgkGAAgRNODESDBnsIHll8ANNSGQM="/>
    </rdf:Seq>
   </darktable:history>
  </rdf:Description>
 </rdf:RDF>
</x:xmpmeta>
