# Supplementary material for: Ten quick tips for getting the most scientific value out of numerical data
Source: PLoS Comput Biol. 2018 Oct 11;14(10):e1006141. doi: 10.1371/journal.pcbi.1006141 (PMC6181270; doi:10.1371/journal.pcbi.1006141)
Supplement: S7 Data — (TGZ) [file pcbi.1006141.s008.tgz]

Archive with 4 entries (4 files):
- plotExample/doExamplePlots.sh
- plotExample/example_plots.tex
- plotExample/plotExample.py
- plotExample/license_CC0.txt
