# Supplementary material for: Ten quick tips for getting the most scientific value out of numerical data
Source: PLoS Comput Biol. 2018 Oct 11;14(10):e1006141. doi: 10.1371/journal.pcbi.1006141 (PMC6181270; doi:10.1371/journal.pcbi.1006141)
Supplement: S7 Data — (TGZ) [file pcbi.1006141.s008.tgz › plotExample/doExamplePlots.sh]

#!/bin/bash

# The code in this file is released under the Creative Commons CC0 license,
# i.e., for unrestricted use and without any warranty,
# see the file license_CC0.txt or https://creativecommons.org/publicdomain/zero/1.0/

./plotExample.py
convert -quality 70 -grayscale lightness ugly_example_plot.png ugly_example_plot.jpg
mogrify -geometry 75% -quality 60 ugly_example_plot.jpg
rm ugly_example_plot.png
pdflatex example_plots
