# Supplementary material for: Ten quick tips for getting the most scientific value out of numerical data
Source: PLoS Comput Biol. 2018 Oct 11;14(10):e1006141. doi: 10.1371/journal.pcbi.1006141 (PMC6181270; doi:10.1371/journal.pcbi.1006141)
Supplement: S7 Data — (TGZ) [file pcbi.1006141.s008.tgz › plotExample/example_plots.tex]

% The code in this file is released under the Creative Commons CC0 license,
% i.e., for unrestricted use and without any warranty,
% see the file license_CC0.txt or https://creativecommons.org/publicdomain/zero/1.0/

\documentclass{standalone}
\usepackage{graphicx,pgf,textcomp}
\usepackage[utf8]{inputenc}
\usepackage{cmbright,amsmath}
\begin{document}
\includegraphics[height=2.5in]{ugly_example_plot}\resizebox{!}{2.5in}{\input{nice_example_plot.pgf}}
\end{document}
