# Supplementary figures and images for: Ten quick tips for getting the most scientific value out of numerical data
Source: PLOS journal article supplement (doi:10.1371/journal.pcbi.1006141), 2018-10-11

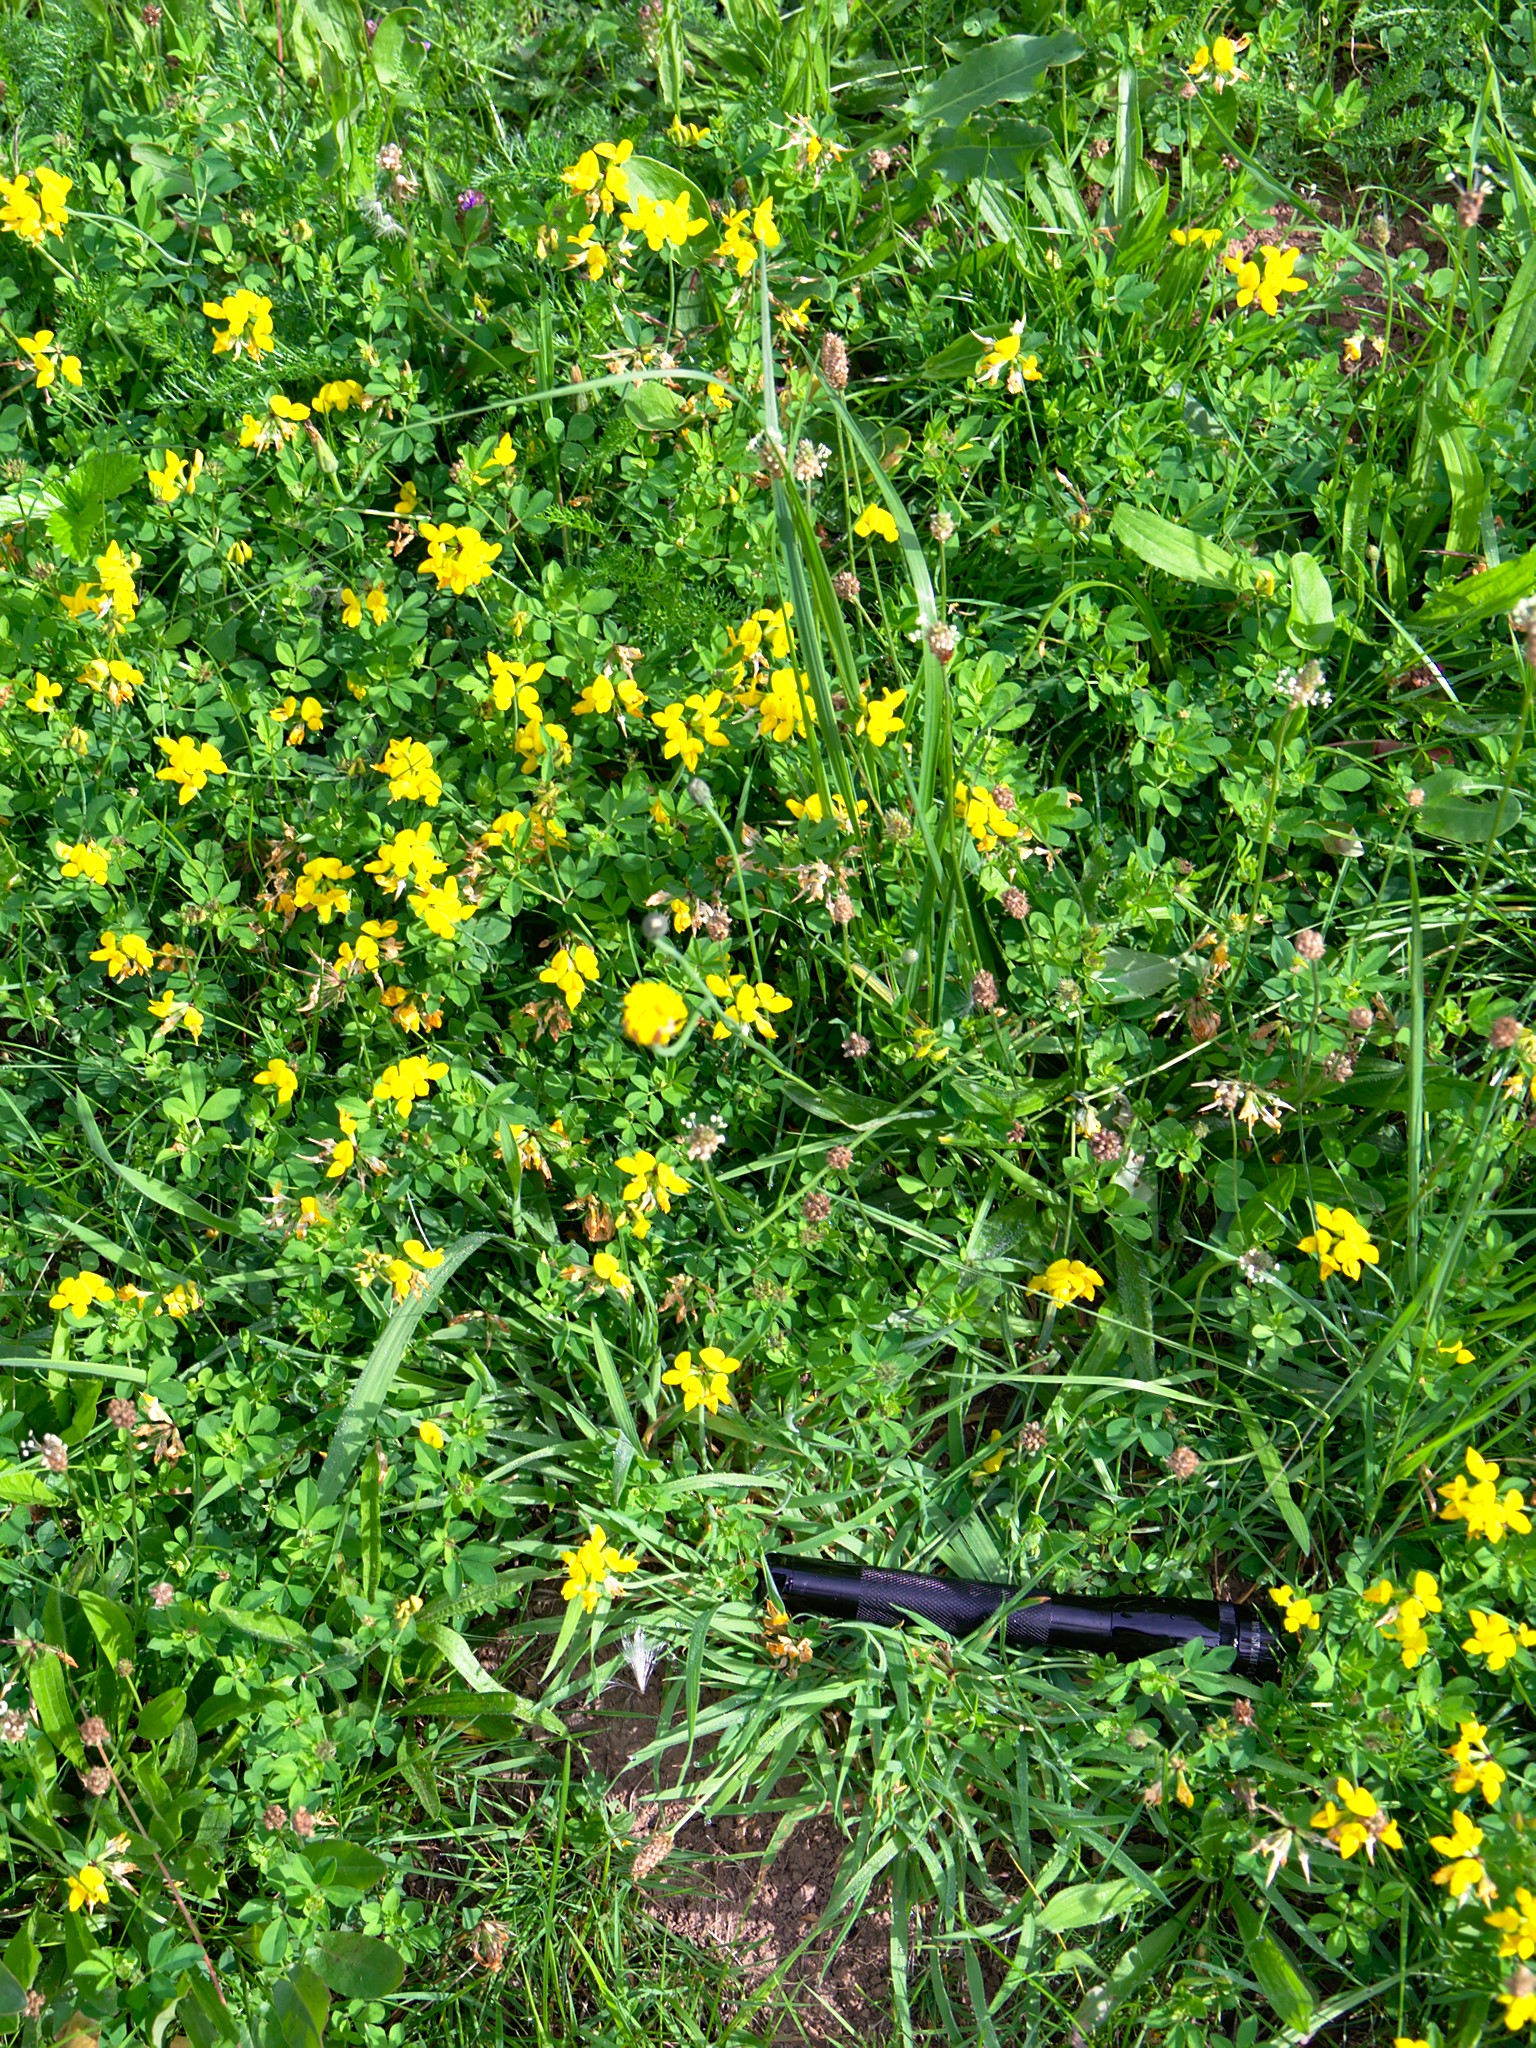

Supplement: S7 (10.1371/journal.pcbi.1006141.s007) [file journal.pcbi.1006141.s007.tgz › flowerExample/DSC_5883.jpg]

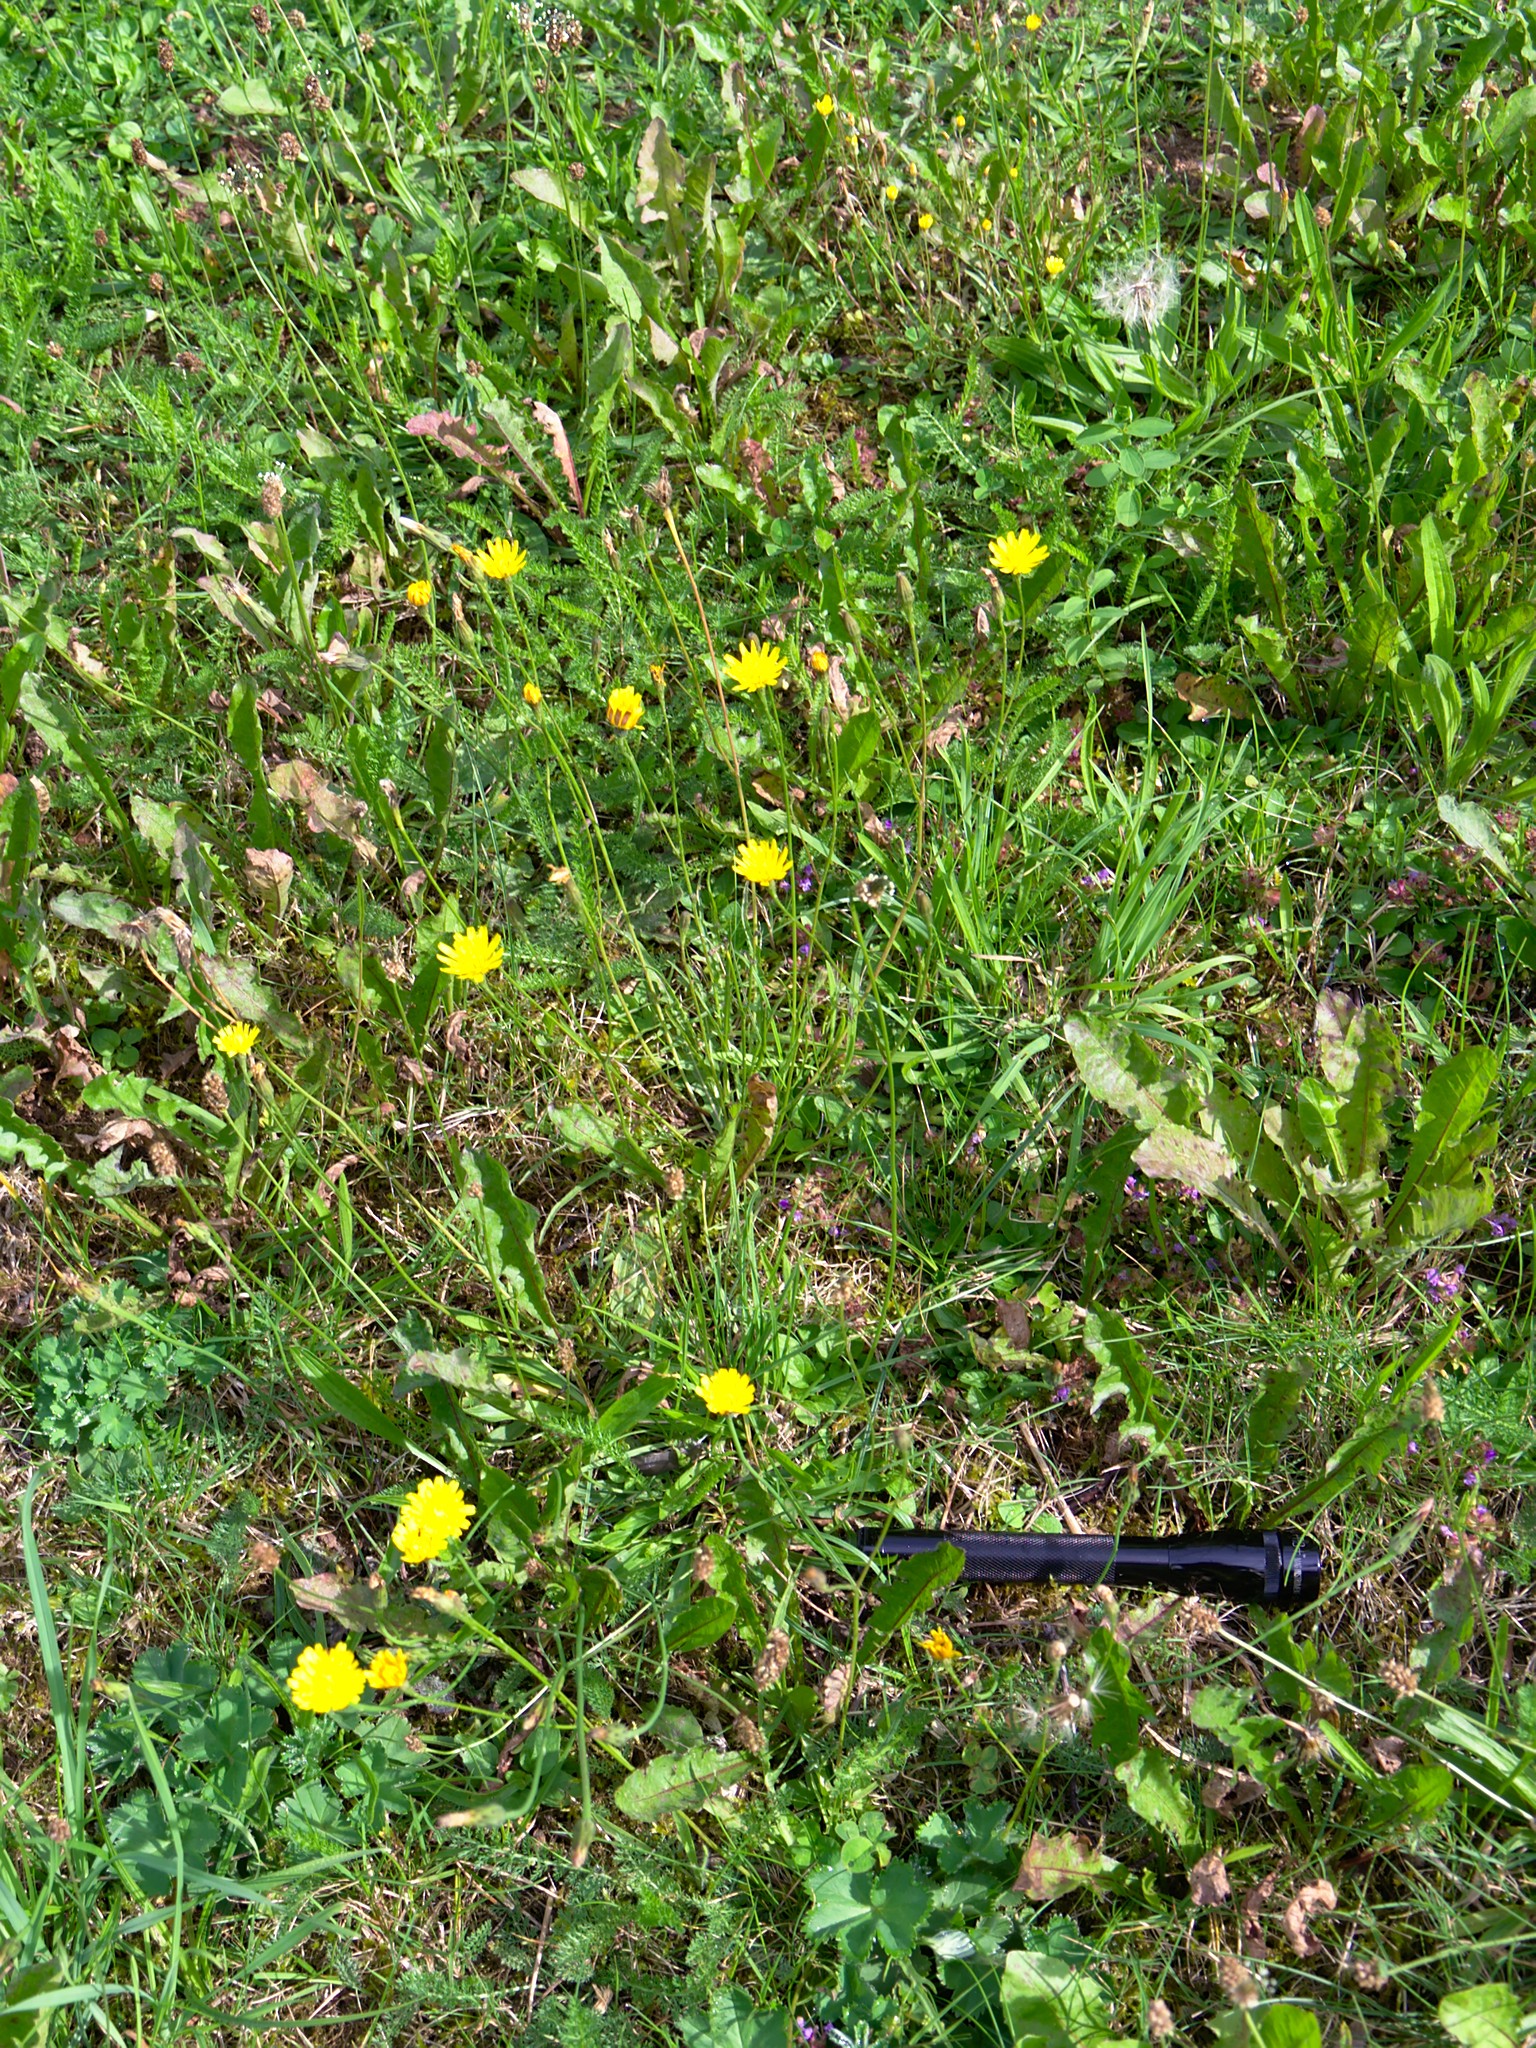

Supplement: S7 (10.1371/journal.pcbi.1006141.s007) [file journal.pcbi.1006141.s007.tgz › flowerExample/DSC_5884.jpg]

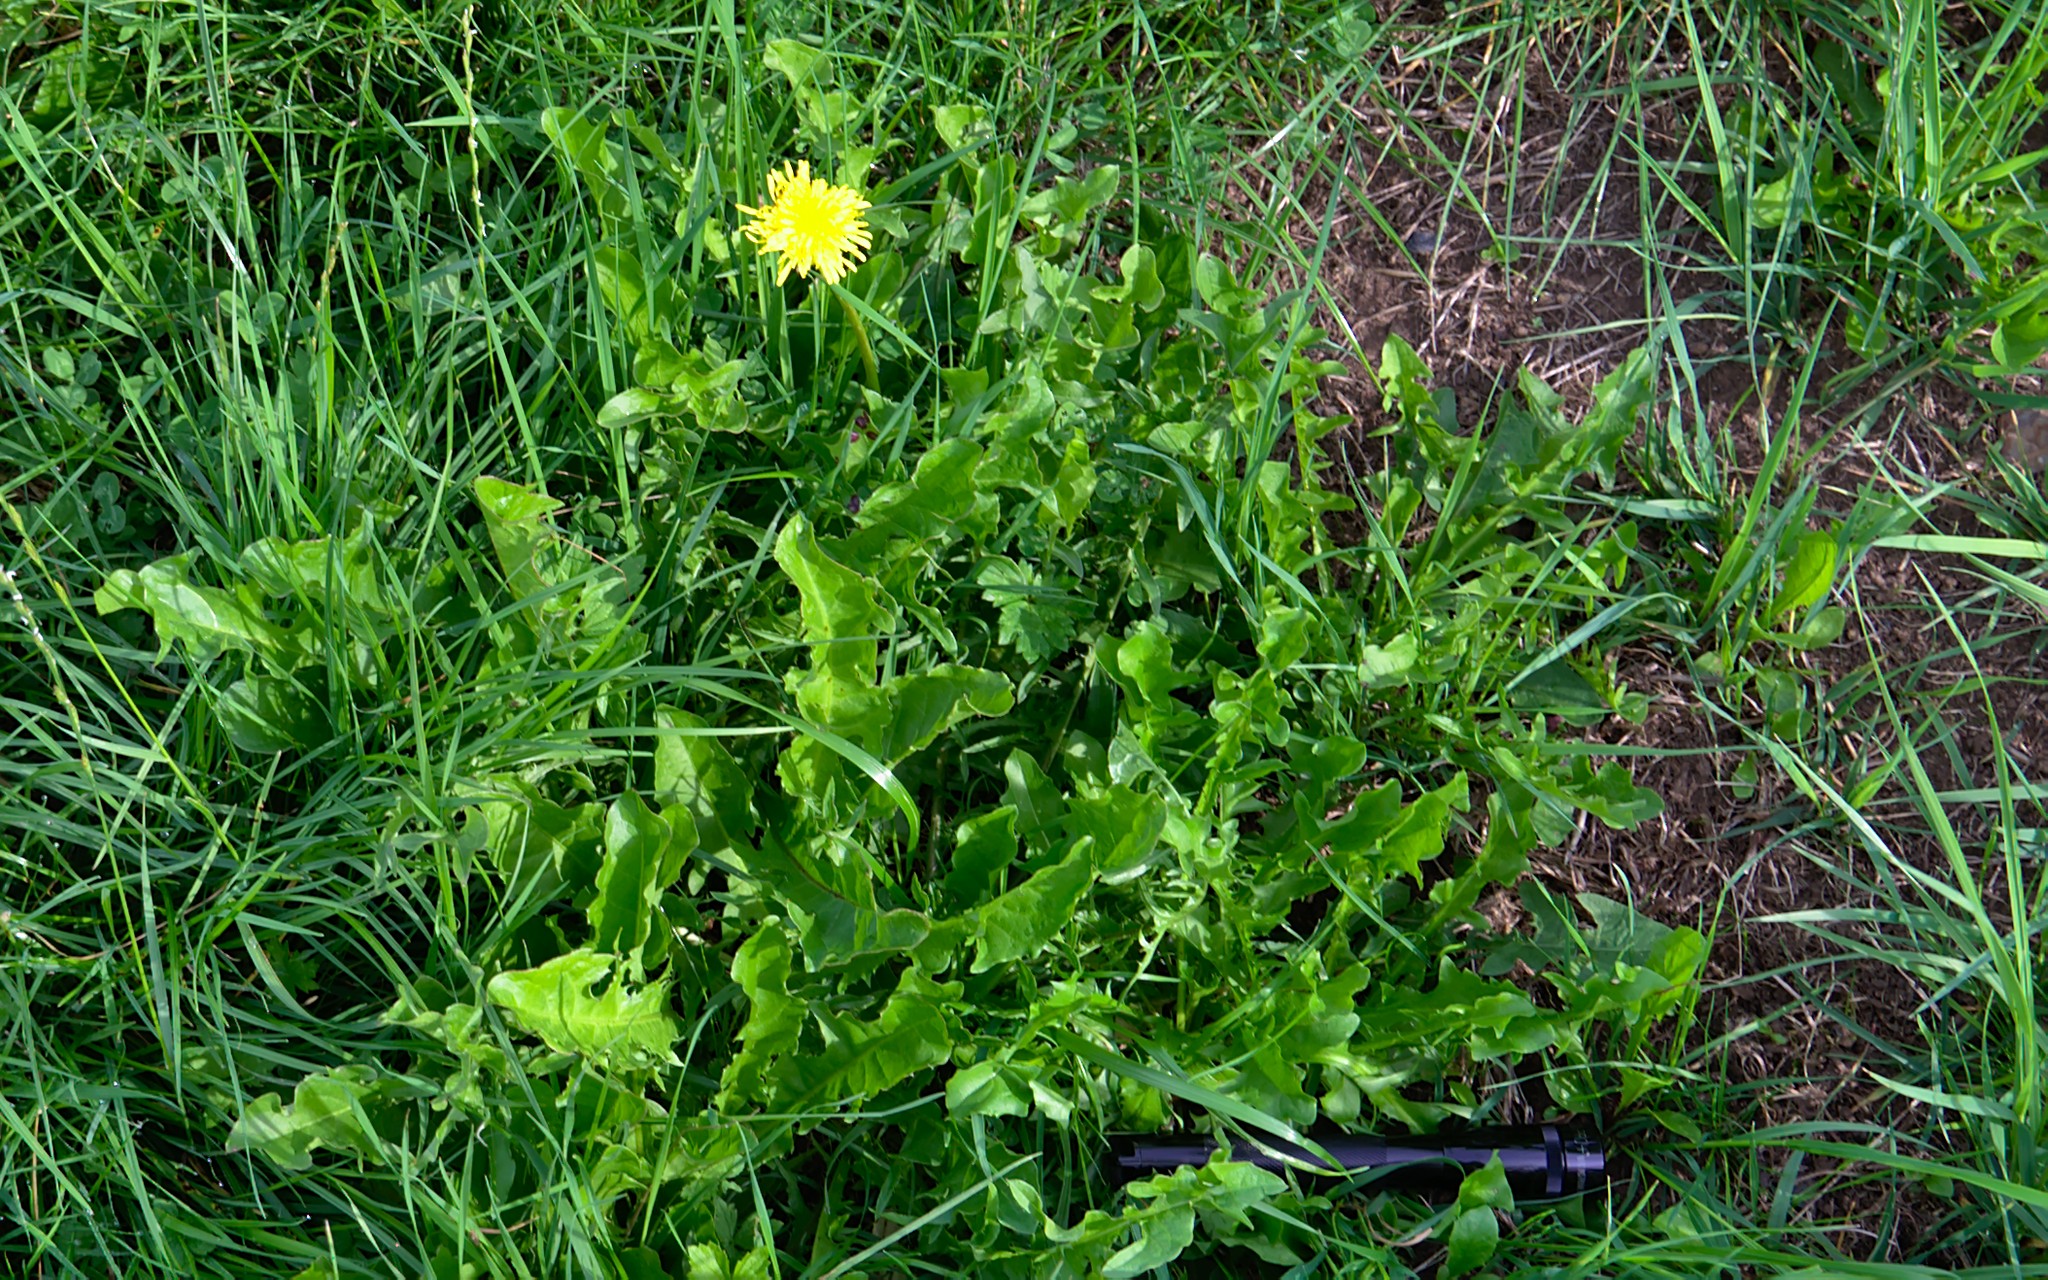

Supplement: S7 (10.1371/journal.pcbi.1006141.s007) [file journal.pcbi.1006141.s007.tgz › flowerExample/DSC_5885.jpg]

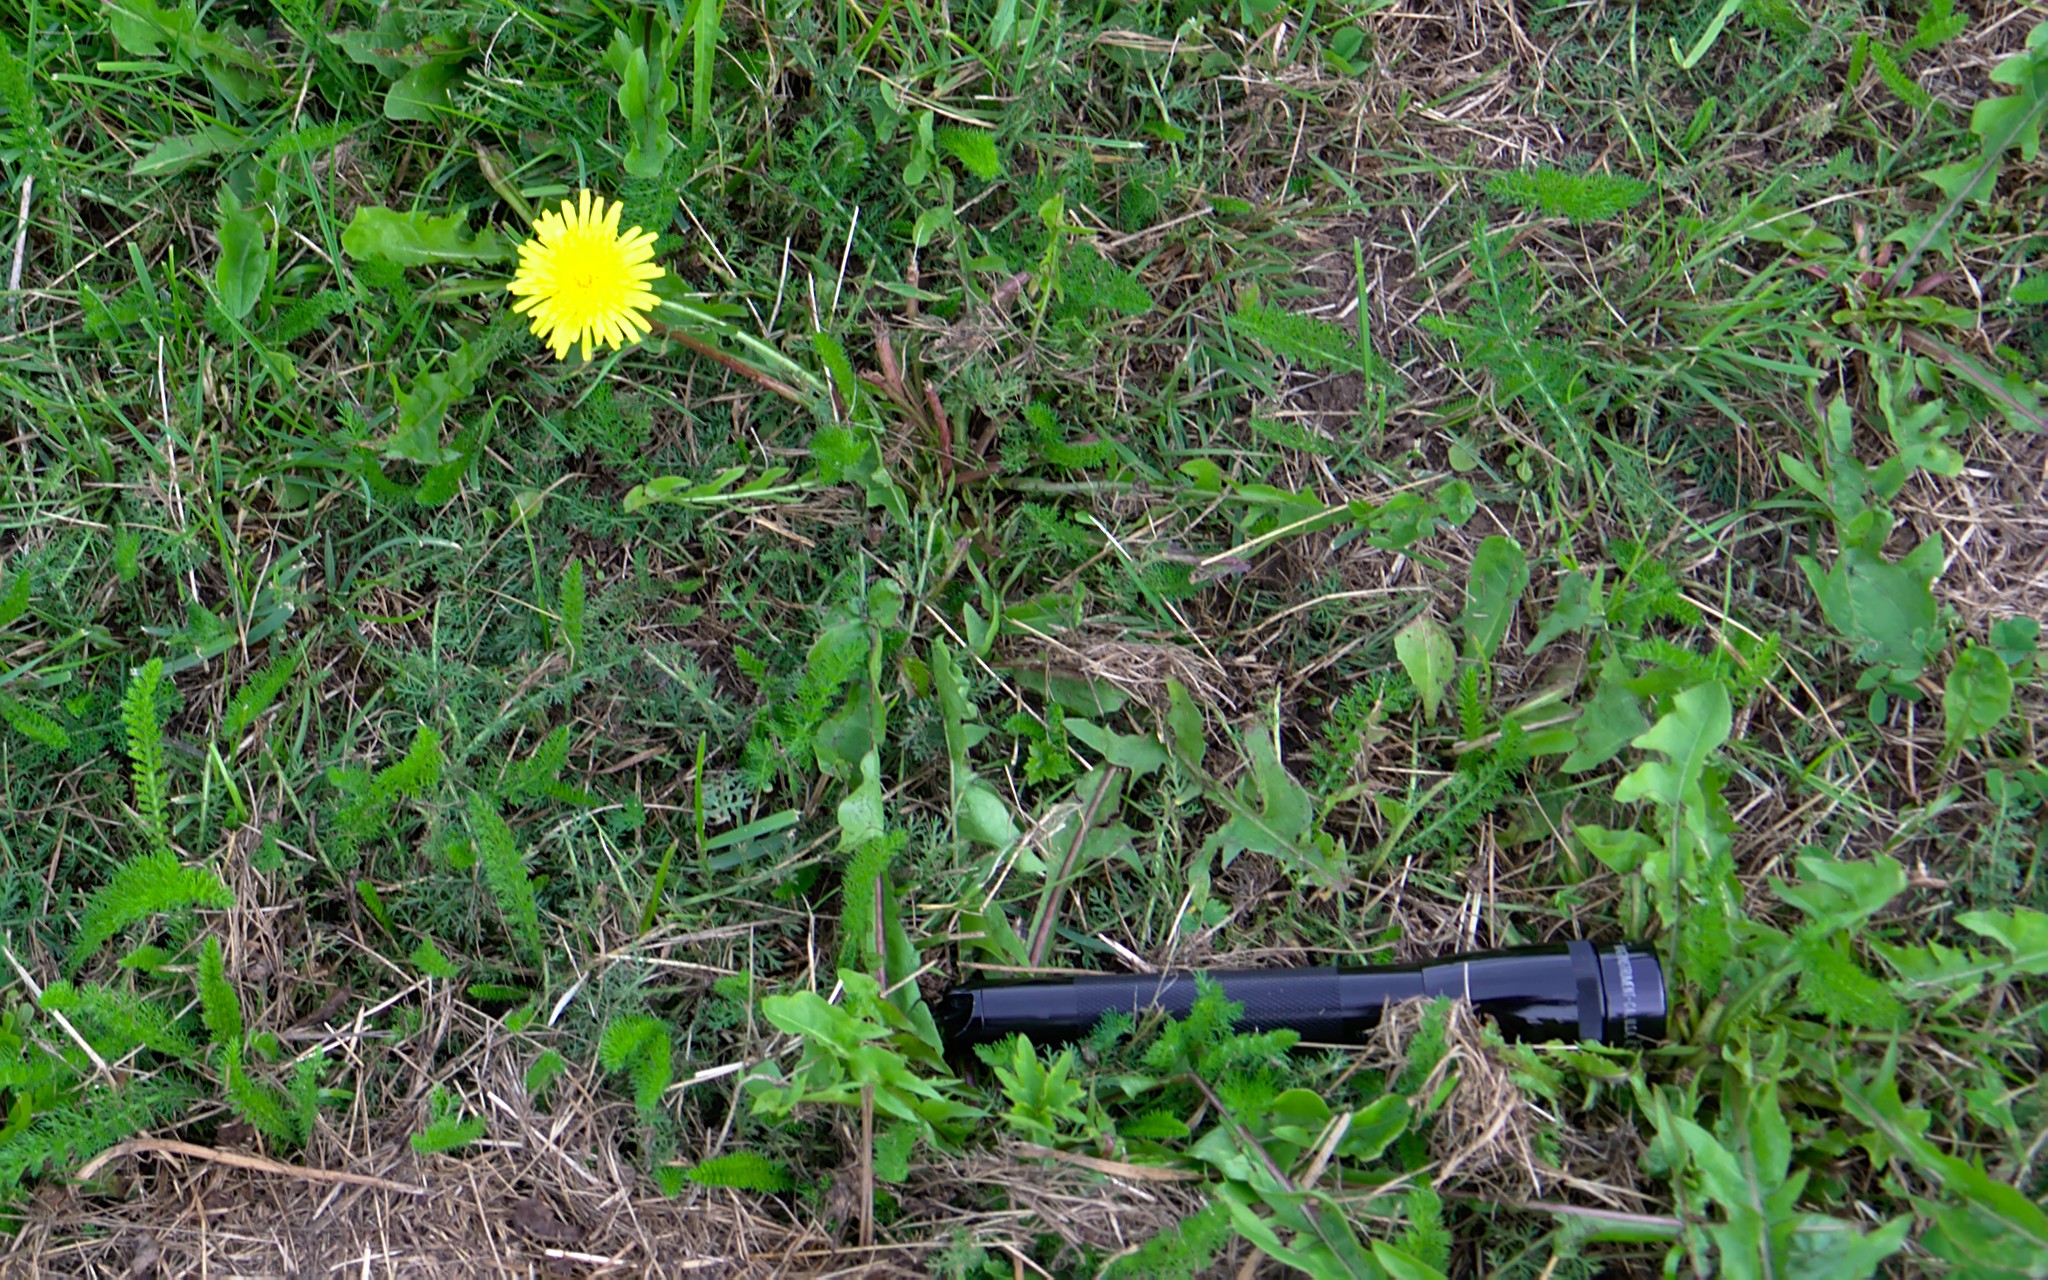

Supplement: S7 (10.1371/journal.pcbi.1006141.s007) [file journal.pcbi.1006141.s007.tgz › flowerExample/DSC_5886.jpg]

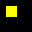

Supplement: S7 (10.1371/journal.pcbi.1006141.s007) [file journal.pcbi.1006141.s007.tgz › flowerExample/test_image.jpg]

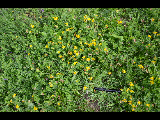

Supplement: S7 (10.1371/journal.pcbi.1006141.s007) [file journal.pcbi.1006141.s007.tgz › flowerExample/rawImages/DSC_5883.NEF]
